# Supplementary material for: Thin and thick primary cutaneous melanomas reveal distinct patterns of somatic copy number alterations
Source: PubMed Central journal article supplement (PMC5058686; doi:10.18632/oncotarget.8758), 2016-04-15
Supplement: oncotarget-07-30365-s001.pdf [file oncotarget-07-30365-s001.pdf]

# Thin and thick primary cutaneous melanomas reveal distinct patterns of somatic copy number alterations

## Supplementary Material

### SCNA > 0.45 Chromosome Arm

#### M2

| Chr | % Alteration/Arm | Gain/Loss |
|-----|------------------|-----------|
| 6p  | 47%              | Gain      |
| 6q  | 86%              | Loss      |
| 7p  | 53%              | Gain      |
| 9p  | 69%              | Loss      |
| 11p | 87%              | Gain      |
| 18q | 55%              | Gain      |
| 8q  | complete (98%)   | Gain      |

#### M11

| Chr | % Alteration/Arm | Gain/Loss |
|-----|------------------|-----------|
| 6p  | 47%              | High Gain |
| 11p | 63%              | Gain      |

#### M14

| Chr   | % Alteration/Arm | Gain/Loss |
|-------|------------------|-----------|
| 4q    | 55%              | Gain      |
| 6p    | 70%              | High Gain |
| 7p    | 61%              | Gain      |
| 8p    | 48%              | Gain      |
| 8p+q  | p half (50%)     | Gain      |
|       | q complete (99%) | Gain      |
| 9p    | 49%              | Loss      |
| 10q   | 75%              | Loss      |
| 10p   | p complete (99%) | Loss      |
| 11p   | 76%              | Gain      |
| 13q   | q complete (96%) | Gain      |
| 14q   | 45%              | Loss      |
| 18p+q | p complete (99%) | Gain      |
|       | q complete (96%) | Gain      |
| 20p   | 70%              | Gain      |

#### M9

| Chr | % Alteration/Arm | Gain/Loss |
|-----|------------------|-----------|
| 2q  | 68%              | Loss      |
| 3q  | 52%              | Loss      |
| 6p  | 47%              | High Gain |
| 6q  | 86%              | Loss      |
| 8q  | 80%              | Gain      |
| 8p  | complete (96%)   | Gain      |
| 19q | complete (95%)   | Loss      |

### Common aberrations

| Chr | % Alteration/Arm | Gain/Loss | Samples         |
|-----|------------------|-----------|-----------------|
| 6p  | 47%              | Gain      | M2, M11 M9, M14 |
| 6q  | at least 85%     | Loss      | M2, M9          |
| 7p  | at least 53%     | Gain      | M2, M14         |
| 8p  | at least 48%     | Gain      | M9, M11         |
| 9p  | at least 50%     | Loss      | M2, M14         |
| 11p | at least 76%     | Gain      | M2, M11, M14    |
| 18q | at least 50%     | Gain      | M2, M11         |

Supplementary Figure 1. Chromosome aberrations in four thick melanomas.

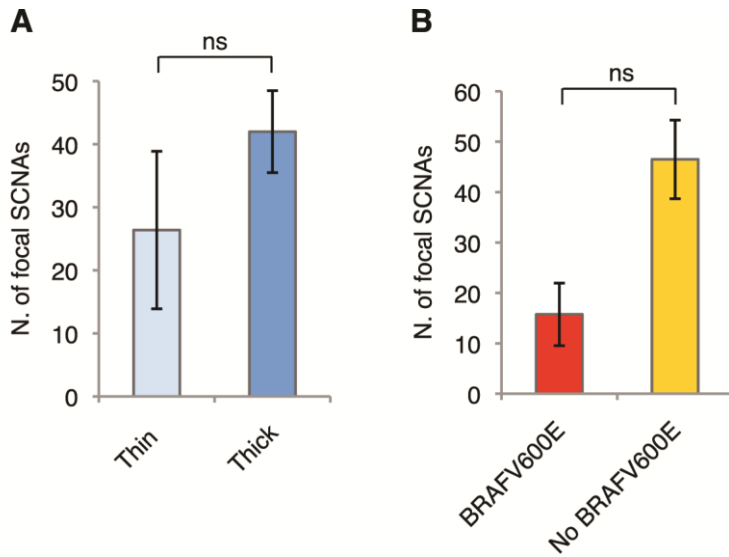

**Supplementary Figure 2.** (A) Number of focal SCNAs in thin (n=5) and thick melanomas (n=5) (p=0.27, Mann-Whitney U test). (B) Number of focal SCNAs in melanomas with BRAFV600E (n=4) and with no BRAFV600E mutation (n=6) (p=0.08, Mann-Whitney U test).

**A**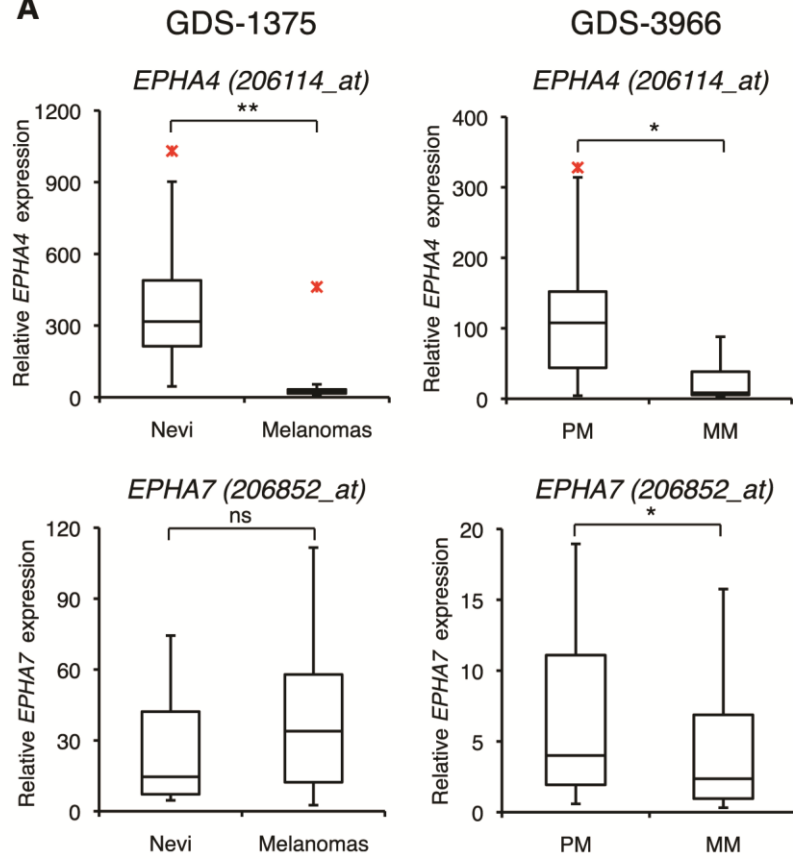**B**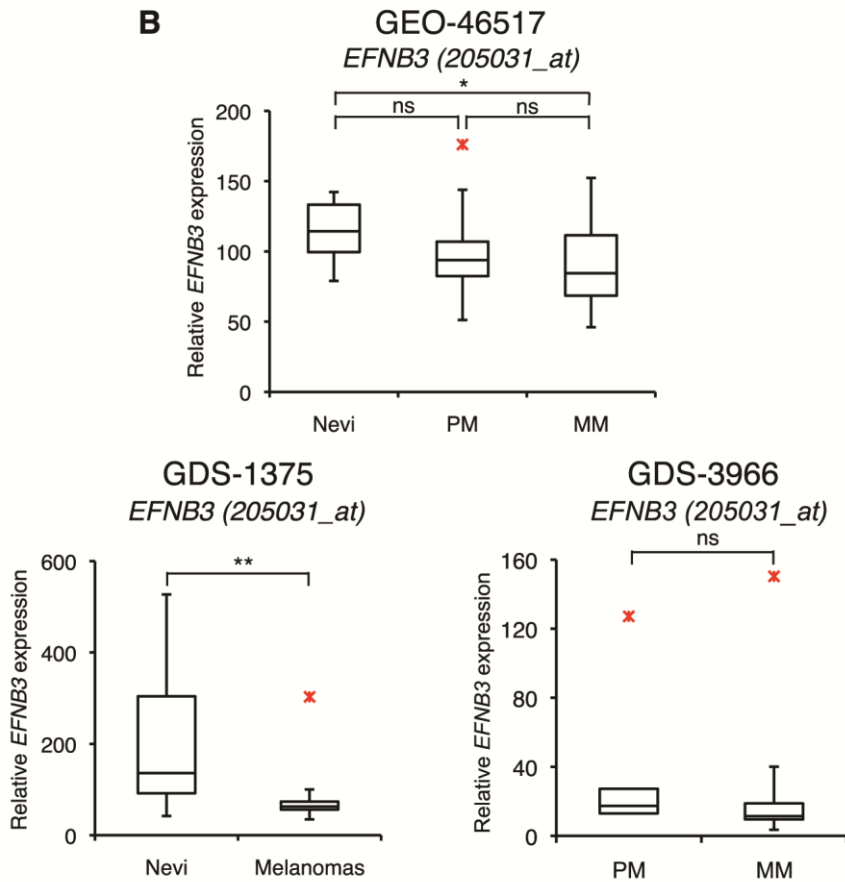

**Supplementary Figure 3.** (A) Expression of *EPHA4* and *EPHA7* mRNA determined by different publicly available microarray data sets (GDS-1375 and GDS-3966). (B) Expression of *EFNB3* mRNA determined by different publicly available microarray data sets (GEO-46517, GDS-1375 and GDS-3966). In GEO-46517 nevi (n=9), primary (n=31) and metastatic (n=73) melanomas. In GDS-1375 nevi (n=17) and melanomas (n=45). In GDS-3966 primary melanomas (n=31) and metastatic melanomas (n=52). PM, primary melanomas; MM, metastatic melanomas. Red crosses indicate outlier values. \*, p<0.05; \*\*, p<0.001.

### GDS-1375

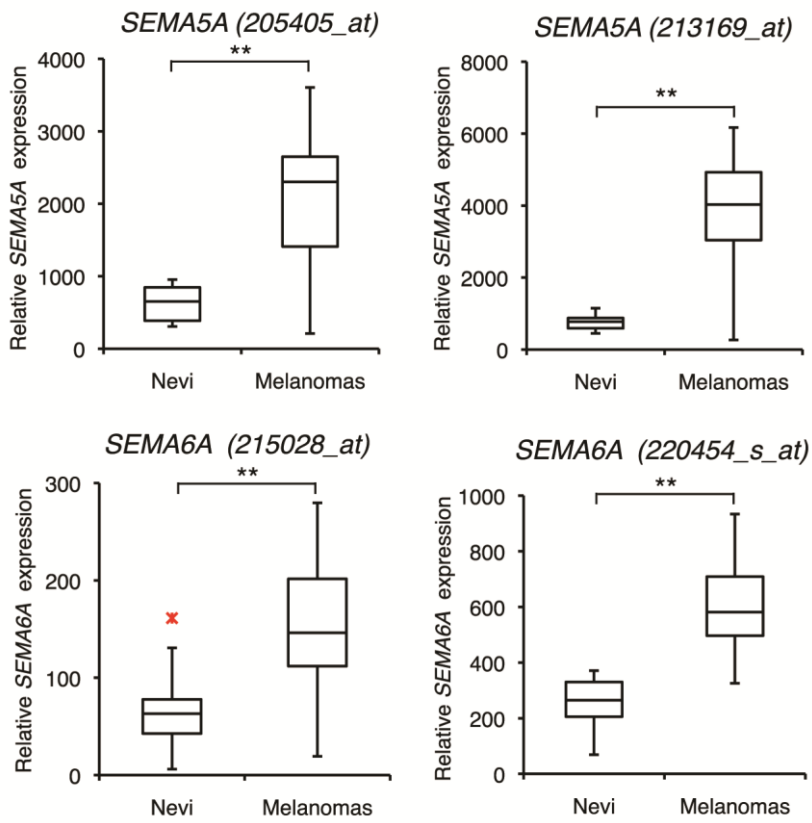

**Supplementary Figure 4.** Expression of *SEMA5A* and *SEMA6A* mRNA in nevi (n=17) and melanomas (n=45) determined by a publicly available microarray data set (GDS-1375). Red crosses indicate outlier values. \*\*, p<0.001.

|                  |                                              |
|------------------|----------------------------------------------|
| <b>Table S1:</b> | Summary of genomic data                      |
| <b>Table S2:</b> | Summary of somatic mutations                 |
| <b>Table S3:</b> | Non-synonymous and stopgain SNVs             |
| <b>Table S4:</b> | Small indels                                 |
| <b>Table S5:</b> | Splice variants                              |
| <b>Table S6:</b> | SCNA gain                                    |
| <b>Table S7:</b> | SCNA loss                                    |
| <b>Table S8:</b> | Mutations found in TCGA and Cosmic databases |
