# Supplementary material for: Thin and thick primary cutaneous melanomas reveal distinct patterns of somatic copy number alterations
Source: PubMed Central journal article supplement (PMC5058686; doi:10.18632/oncotarget.8758), 2016-04-15
Supplement: oncotarget-07-30365-s002.pdf [file oncotarget-07-30365-s002.pdf]

| Somatic SNVs, splice site variants and InDels in 10 primary melanomas |                                              |                                                                                                                        |
|-----------------------------------------------------------------------|----------------------------------------------|------------------------------------------------------------------------------------------------------------------------|
| <b>Table S1:</b>                                                      | Summary of genomic data                      |                                                                                                                        |
| <b>Table S2:</b>                                                      | Summary of somatic mutations                 |                                                                                                                        |
| <b>Table S3:</b>                                                      | Non-synonymous and stopgain SNVs             |                                                                                                                        |
| <b>Table S4:</b>                                                      | Small indels                                 |                                                                                                                        |
| <b>Table S5:</b>                                                      | Splice variants                              |                                                                                                                        |
| <b>Table S6:</b>                                                      | SCNA gain                                    |                                                                                                                        |
| <b>Table S7:</b>                                                      | SCNA loss                                    |                                                                                                                        |
| <b>Table S8:</b>                                                      | Mutations found in TCGA and Cosmic databases |                                                                                                                        |
|                                                                       |                                              |                                                                                                                        |
| Nomenclature                                                          | SNV                                          | Single Nucleotide Variant                                                                                              |
|                                                                       | Non-Syn                                      | non synonymous                                                                                                         |
|                                                                       | InDel                                        | Small Insertions and Deletions                                                                                         |
|                                                                       | SIFT                                         | Sorting Intolerant from Tolerant- <a href="http://sift.bii.a-star.edu.sg/">http://sift.bii.a-star.edu.sg/</a>          |
|                                                                       | PolyPhen2                                    | Polymorphism Phenotyping v2- <a href="http://genetics.bwh.harvard.edu/pph2/">http://genetics.bwh.harvard.edu/pph2/</a> |
|                                                                       | GERP++                                       | Genomic Evolutionary Rate Profiling                                                                                    |

Summary of genomic data

| Supplementary Table S1     |            |            |            |            |            |            |            |            |            |            |
|----------------------------|------------|------------|------------|------------|------------|------------|------------|------------|------------|------------|
| Summary of genomic data    |            |            |            |            |            |            |            |            |            |            |
| Sample                     | M1         | M2         | M4         | M6         | M8         | M9         | M11        | M14        | M16        | M17        |
| Tumor Bases Sequenced      | 4503469345 | 6195271195 | 5232754210 | 6261716882 | 5583555317 | 5351785545 | 5341091813 | 4560712004 | 4467582677 | 4569279857 |
| Normal Bases Sequenced     | 2367399291 | 1921479243 | 1666103631 | 4748181895 | 2517910195 | 3227203795 | 3203787467 | 4749850637 | 2054593095 | 2363325389 |
| Tumor Depth (Mean)         | 72.54      | 99.79      | 84.28      | 100.86     | 89.93      | 86.2       | 86.03      | 73.46      | 71.96      | 73.6       |
| Normal Depth (Mean)        | 38.13      | 30.95      | 26.84      | 76.48      | 40.56      | 51.98      | 51.6       | 76.51      | 33.09      | 38.07      |
| Tumor Depth (Median)       | 59         | 77         | 68         | 91         | 70         | 66         | 40         | 66         | 57         | 59         |
| Normal Depth (Median)      | 30         | 24         | 22         | 71         | 32         | 40         | 66         | 69         | 26         | 30         |
| Tumor Bases Above 10X (%)  | 92.7       | 94.3       | 93.7       | 94.1       | 94.3       | 93.7       | 93.8       | 92.2       | 92.7       | 93.2       |
| Normal Bases Above 10X (%) | 87.7       | 83.8       | 80.3       | 92.9       | 88.7       | 91.4       | 91.5       | 93.1       | 85.2       | 87.5       |

| <b>Supplementary Table S2</b>       |                          |              |
|-------------------------------------|--------------------------|--------------|
| <b>Summary of somatic mutations</b> |                          |              |
| <b>Category</b>                     | <b>Class</b>             | <b>Total</b> |
| Base Substitutions & Indels         | Total mutations          | 3,815        |
|                                     | <i>Synonymous</i>        | 1,192        |
|                                     | <i>Missense</i>          | 2,150        |
|                                     | <i>Nonsense</i>          | 138          |
|                                     | <i>Splice Site</i>       | 58           |
|                                     | <i>In-Frame Indel</i>    | 72           |
|                                     | <i>Frame-shift indel</i> | 205          |
|                                     | Total Indels             | 277          |
|                                     | <i>Insertions</i>        | 87           |
|                                     | <i>Deletions</i>         | 190          |

Supplementary Table S3

| Non Synonymous and Stop Gain SNVs |           | Gene symbol | Gene description | Accession                                           | Reference Allele | Variant Allele | Variant classification | cDNA change         | Protein change     | Sample             | SIFT | Polyphen2 | GERP++ |        |
|-----------------------------------|-----------|-------------|------------------|-----------------------------------------------------|------------------|----------------|------------------------|---------------------|--------------------|--------------------|------|-----------|--------|--------|
| Chr                               | Start     | End         |                  |                                                     |                  |                |                        |                     |                    |                    |      |           |        |        |
| 1                                 | 111861974 | 111861974   | CHIA             | chitinase, acidic                                   | NM_201653.3      | T              | C                      | nonsynonymous SNV   | T1061C             | F354S              | M1   | D         | D      | 3.8    |
| 1                                 | 120057246 | 120057246   | HSD3B1           | hydroxy-delta-5-steroid dehydrogenase               | NM_000862        | C              | A                      | nonsynonymous SNV   | C1100A             | T367N              | M1   | T         | B      | -0.043 |
| 1                                 | 12368514  | 12368514    | VPS13D           | vacuolar protein sorting 13 homolog D               | NM_015378.3      | G              | T                      | nonsynonymous SNV   | G6466T             | V2156F             | M1   | D         | B      | 4.47   |
| 1                                 | 152188109 | 152188109   | HRNR             | hornerin                                            | NM_001009931     | T              | A                      | nonsynonymous SNV   | A5996T             | Q1999L             | M1   | T         | B      | 3.05   |
| 1                                 | 157668390 | 157668390   | FCRL3            | Fc receptor-like 3                                  | NM_052939        | T              | C                      | nonsynonymous SNV   | A82G               | N28D               | M1   | T         | B      | -10.7  |
| 1                                 | 158298748 | 158298748   | CD1B             | CD1b molecule                                       | NM_001764        | G              | A                      | nonsynonymous SNV   | C943T              | L315F              | M1   | T         | B      | -3.14  |
| 1                                 | 19413261  | 19413261    | UBR4             | ubiquitin protein ligase E3 component 4             | NM_020765        | T              | A                      | nonsynonymous SNV   | A14599T            | M4867L             | M1   | T         | B      | 0.893  |
| 1                                 | 205272648 | 205272648   | NUAK2            | myogenin (myogenic factor 4)                        | NM_030952        | G              | A                      | nonsynonymous SNV   | C1817T             | S606F              | M1   | D         | D      | 4.94   |
| 1                                 | 231471745 | 231471745   | EXOC8            | exocyst complex component 8                         | NM_175876        | G              | T                      | nonsynonymous SNV   | C1747A             | P583T              | M1   | T         | D      | 5.54   |
| 1                                 | 247835908 | 247835908   | OR13G1           | olfactory receptor, family 13, group 1              | NM_001005487     | T              | A                      | nonsynonymous SNV   | A436T              | M146L              | M1   | D         | B      | -1.12  |
| 1                                 | 248059712 | 248059712   | OR2W3            | olfactory receptor, family 2, subfamily 3           | NM_001001957     | T              | C                      | nonsynonymous SNV   | T824C              | M275T              | M1   | T         | B      | 5.29   |
| 1                                 | 26385076  | 26385076    | TRIM63           | tripartite motif containing 63                      | NM_032588        | C              | A                      | nonsynonymous SNV   | G636T              | K212N              | M1   | D         | B      | 4.58   |
| 1                                 | 33361178  | 33361178    | TMEM54           | transmembrane protein 54                            | NM_033504        | G              | A                      | nonsynonymous SNV   | C437T              | P146L              | M1   | D         | D      | 5.32   |
| 1                                 | 89652071  | 89652071    | GBP4             | guanylate binding protein 4                         | NM_052941        | T              | C                      | nonsynonymous SNV   | A1652G             | E551G              | M1   | T         | B      | -6.34  |
| 10                                | 3208567   | 3208567     | PITRM1           | pitriylsin metalloproteinase 1                      | NM_001242307.1   | C              | G                      | GCACGCTAGG stopgain | 271_272insCATTCTCC | Q91_F92delinsPFLSL | M1   |           |        |        |
| 10                                | 48414365  | 48414365    | GDF2             | growth differentiation factor 2                     | NM_016204        | C              | T                      | nonsynonymous SNV   | G503A              | G168E              | M1   | T         | D      | 5.73   |
| 11                                | 18735639  | 18735639    | IGSF22           | immunoglobulin superfamily, member 22               | NM_173588        | C              | A                      | nonsynonymous SNV   | G1855T             | V619L              | M1   | T         | D      | 0.836  |
| 11                                | 499914    | 499914      | RNH1             | ribonuclease/angiogenesis inhibitor 1               | NM_002939.3      | G              | A                      | nonsynonymous SNV   | C358T              | L120F              | M1   | D         | D      | 3.03   |
| 11                                | 55322235  | 55322235    | OR4C15           | olfactory receptor, family 4, subfamily 15          | NM_001001920     | G              | A                      | nonsynonymous SNV   | G453A              | M151I              | M1   | T         | B      | 5.12   |
| 11                                | 55703068  | 55703068    | OR51             | olfactory receptor, family 5, subfamily 1           | NM_006637        | G              | A                      | nonsynonymous SNV   | C809T              | P270L              | M1   | T         | B      | 2.24   |
| 11                                | 56185689  | 56185689    | OR5R1            | olfactory receptor, family 5, subfamily 1           | NM_001004744     | A              | G                      | nonsynonymous SNV   | T20C               | I7T                | M1   | T         | B      | 5.7    |
| 11                                | 56230240  | 56230240    | OR5M9            | olfactory receptor, family 5, subfamily 9           | NM_001004743     | A              | T                      | nonsynonymous SNV   | T638A              | L213H              | M1   | D         | D      | 4.39   |
| 11                                | 56409051  | 56409051    | OR5AP2           | olfactory receptor, family 5, subfamily 2           | NM_001002925     | G              | A                      | nonsynonymous SNV   | C865T              | P289S              | M1   | D         | P      | 4.02   |
| 11                                | 64137784  | 64137784    | RPS6KA4          | ribosomal protein S6 kinase, family 4, subfamily A  | NM_003942.2      | C              | T                      | nonsynonymous SNV   | C1885T             | R629C              | M1   | T         | P      | 4.3    |
| 11                                | 70331722  | 70331722    | SHANK2           | SH3 and multiple ankyrin repeat domain 2            | NM_133266        | C              | A                      | nonsynonymous SNV   | G2912T             | S971I              | M1   | D         | P      | 4.48   |
| 11                                | 75511479  | 75511479    | DGAT2            | diacylglycerol O-acyltransferase 2                  | NM_032564.4      | G              | A                      | nonsynonymous SNV   | G1093A             | A365T              | M1   | T         | P      | 3.47   |
| 11                                | 828916    | 828916      | CRACR2B          | calcium release activated calcium receptor 2B       | NM_001286606.1   | G              | A                      | nonsynonymous SNV   | G230A              | R77Q               | M1   | T         | B      | 2.2    |
| 12                                | 109923849 | 109923849   | UBE3B            | ubiquitin protein ligase E3B1                       | NM_130466.3      | C              | A                      | nonsynonymous SNV   | C315A              | S105R              | M1   | T         | B      | 5.03   |
| 12                                | 120941627 | 120941627   | COQ5             | coenzyme Q5, methyltransferase                      | NM_0032314       | G              | T                      | nonsynonymous SNV   | C944A              | T315K              | M1   | D         | D      | 5.76   |
| 12                                | 15650259  | 15650259    | PTPRO            | protein tyrosine phosphatase, receptor type C       | NM_030667.2      | C              | T                      | nonsynonymous SNV   | C430T              | P144S              | M1   | T         | D      | 2.497  |
| 12                                | 52818504  | 52818504    | KRT75            | keratin 75, type II                                 | NM_004693        | T              | G                      | nonsynonymous SNV   | A1453C             | S485R              | M1   | T         | B      | -3.45  |
| 12                                | 52842736  | 52842736    | KRT6B            | keratin 6B, type II                                 | NM_005555        | C              | C                      | nonsynonymous SNV   | A1093G             | I365V              | M1   | T         | B      | 1.15   |
| 12                                | 53586319  | 53586319    | ITGB7            | integrin, beta 7                                    | NM_000889        | G              | T                      | nonsynonymous SNV   | C1950A             | D650E              | M1   |           | P      | 3.39   |
| 12                                | 6838439   | 6838439     | COP57A           | COP9 signalosome subunit 7                          | NM_001164093.1   | G              | T                      | nonsynonymous SNV   | G354T              | E118D              | M1   | T         | B      | 1.17   |
| 12                                | 91502687  | 91502687    | LUM              | lumican                                             | NM_002345        | C              | T                      | nonsynonymous SNV   | G70A               | D24N               | M1   | T         | B      | 4.75   |
| 13                                | 25671292  | 25671292    | PABPC3           | poly(A) binding protein, cytoplasmic 3              | NM_030979        | C              | T                      | nonsynonymous SNV   | C956T              | T319I              | M1   | D         | P      | 0.875  |
| 13                                | 35735999  | 35735999    | NBEA             | neurobeachin                                        | NM_015678        | G              | A                      | nonsynonymous SNV   | G3974A             | R1325Q             | M1   | T         | D      | 5.04   |
| 14                                | 103803160 | 103803160   | EIF5             | eukaryotic translation initiation factor 5          | NM_001969.4      | G              | T                      | stopgain            | G301T              | E101X              | M1   | T         |        | 4.7    |
| 14                                | 39777676  | 39777676    | CTAGE5           | CTAGE family, member 5                              | NM_001247989.1   | G              | C                      | nonsynonymous SNV   | G1093C             | E365Q              | M1   |           | B      | 4.5    |
| 14                                | 65239539  | 65239539    | SPTB             | spectrin, beta, erythrocytic                        | NM_001024858.2   | C              | T                      | stopgain            | G5312A             | W1771X             | M1   | T         |        | 5.21   |
| 15                                | 42166500  | 42166500    | SPTBN5           | spectrin, beta, non-erythrocytic 5                  | NM_016642        | C              | T                      | nonsynonymous SNV   | G4679A             | R1560H             | M1   | T         | B      | -5.21  |
| 15                                | 43820498  | 43820498    | MAP1A            | microtubule-associated protein 1A                   | NM_002373        | C              | T                      | nonsynonymous SNV   | C6827T             | S2276F             | M1   | T         | B      | 4.23   |
| 16                                | 11272426  | 11272426    | CLEC16A          | C-type lectin domain family 16, member A            | NM_015226        | A              | C                      | nonsynonymous SNV   | A3041C             | D1014A             | M1   | T         | D      | 4.87   |
| 16                                | 28607232  | 28607232    | SULT1A2          | sulfotransferase family, cytosolic 1A2              | NM_001054.3      | A              | G                      | nonsynonymous SNV   | T20C               | I7T                | M1   | T         | B      | -4.51  |
| 16                                | 48201432  | 48201432    | ABCC11           | ATP-binding cassette, subfamily C, member 11        | NM_032583.3      | T              | C                      | nonsynonymous SNV   | A4031G             | H1344R             | M1   | T         | B      | 2.03   |
| 16                                | 53653071  | 53653071    | RPGRIP1L         | RPGRIP1-like                                        | NM_015272.3      | G              | T                      | nonsynonymous SNV   | C3482A             | S1161Y             | M1   |           | P      | 5.11   |
| 16                                | 848784    | 848784      | GNG13            | guanine nucleotide binding protein 13               | NM_016541        | A              | T                      | nonsynonymous SNV   | T139A              | F47I               | M1   | D         | D      | 5.07   |
| 17                                | 26955355  | 26955355    | KIAA0100         | KIAA0100                                            | NM_014680        | C              | C                      | nonsynonymous SNV   | A4522G             | T1508A             | M1   | T         | B      | -1.17  |
| 17                                | 33288604  | 33288604    | ZNF830           | zinc finger protein 830                             | NM_052857        | G              | T                      | nonsynonymous SNV   | G19T               | A7S                | M1   | T         | B      | -5.03  |
| 17                                | 48677002  | 48677002    | CACNA1G          | calcium channel, voltage-dependent L-type, CACNA1G  | NM_018896.4      | C              | T                      | nonsynonymous SNV   | C3472T             | H1158Y             | M1   | T         | B      | 1.63   |
| 17                                | 71386453  | 71386453    | SDK2             | sidekick cell adhesion molecule 2                   | NM_001144952     | C              | A                      | nonsynonymous SNV   | G4165T             | A1389S             | M1   | T         | D      | 5.2    |
| 17                                | 7366032   | 7366032     | ZBTB4            | zinc finger and BTB domain class 4                  | NM_020899.3      | C              | A                      | nonsynonymous SNV   | G2269T             | A757S              | M1   | T         | B      | -1.34  |
| 17                                | 74765833  | 74765833    | MFSD11           | major facilitator superfamily domain 11             | NM_001242532.1   | G              | A                      | nonsynonymous SNV   | G754A              | E252K              | M1   | D         | P      | 4.71   |
| 17                                | 7578263   | 7578263     | TP53             | tumor protein p53                                   | NM_000546.5      | G              | A                      | stopgain            | C586T              | R196X              | M1   | T         | B      | 4.44   |
| 19                                | 12541795  | 12541795    | ZNF443           | zinc finger protein 443                             | NM_005815        | C              | A                      | nonsynonymous SNV   | G1191T             | Q397H              | M1   | D         | B      | -2.74  |
| 19                                | 12542653  | 12542653    | ZNF443           | zinc finger protein 443                             | NM_005815        | T              | G                      | nonsynonymous SNV   | A333C              | K111N              | M1   | T         | B      | -0.006 |
| 19                                | 12542654  | 12542654    | ZNF443           | zinc finger protein 443                             | NM_005815        | T              | A                      | nonsynonymous SNV   | A332T              | K111I              | M1   | T         | B      | -1.34  |
| 19                                | 13211811  | 13211811    | LYL1             | lymphoblastic leukemia associated protein 1         | NM_005583        | C              | A                      | nonsynonymous SNV   | G175T              | G59C               | M1   | D         | P      | 3.53   |
| 19                                | 15918802  | 15918802    | OR10H1           | olfactory receptor, family 10, subfamily 1          | NM_013940        | C              | G                      | nonsynonymous SNV   | G46C               | G16R               | M1   | D         | D      | 2.28   |
| 19                                | 17040006  | 17040006    | CPAMD8           | C3 and PZP-like, alpha-2-macroglobulin-associated 8 | NM_015692        | C              | A                      | nonsynonymous SNV   | G3031T             | V1011L             | M1   | T         | B      | 2.35   |
| 19                                | 22846697  | 22846697    | ZNF492           | zinc finger protein 492                             | NM_020855        | T              | C                      | nonsynonymous SNV   | T226C              | C76R               | M1   | D         | B      | -0.852 |
| 19                                | 42596244  | 42596244    | POU2F2           | POU class 2 homeobox 2                              | NM_001207025.2   | C              | A                      | nonsynonymous SNV   | G1377T             | L459F              | M1   | D         | D      | 3.62   |
| 19                                | 45716461  | 45716461    | EXOC3L2          | exocyst complex component 3L2                       | NM_138568        | G              | C                      | nonsynonymous SNV   | C1096G             | G247R              | M1   | T         | B      | 2.12   |

|    |           |           |                |                                    |                |   |    |                   |              |                  |    |   |   |        |
|----|-----------|-----------|----------------|------------------------------------|----------------|---|----|-------------------|--------------|------------------|----|---|---|--------|
| 19 | 50463982  | 50463982  | SIGLEC11       | sialic acid binding Ig-like lectin | NM_052884.2    | T | G  | nonsynonymous SNV | A287C        | E96A             | M1 | T | B | -1.5   |
| 19 | 54745508  | 54745508  | LILRA6, LILRB3 | leukocyte immunoglobulin-like      | NM_001081450.2 | G | A  | nonsynonymous SNV | C602T        | T201I            | M1 | D | P | -4.75  |
| 19 | 56515242  | 56515242  | NLRP5          | NLR family, pyrin domain con       | NM_153447      | G | A  | nonsynonymous SNV | G223A        | E75K             | M1 | T | D | 2.12   |
| 19 | 57089691  | 57089691  | ZNF470         | zinc finger protein 470            | NM_001001668   | C | T  | nonsynonymous SNV | C1894T       | H632Y            | M1 | T | B | 3.92   |
| 19 | 9028373   | 9028373   | MUC16          | mucin 16, cell surface associ      | NM_024690      | G | A  | nonsynonymous SNV | C36419T      | T12140M          | M1 | D | D | 2.63   |
| 2  | 113404557 | 113404557 | SLC20A1        | solute carrier family 20 (phos     | NM_005415      | C | A  | nonsynonymous SNV | C152A        | A51D             | M1 | D | D | 5.28   |
| 2  | 113414759 | 113414759 | SLC20A1        | solute carrier family 20 (phos     | NM_005415      | T | A  | nonsynonymous SNV | T719A        | V240D            | M1 | T | P | 3.52   |
| 2  | 132290275 | 132290275 | CCDC74A        | coiled-coil domain containing      | NM_138770.2    | T | A  | nonsynonymous SNV | T797A        | L266Q            | M1 | D | D | 2.66   |
| 2  | 138738831 | 138738831 | HNMT           | histamine N-methyltransferas       | NM_001024075   | G | T  | nonsynonymous SNV | G236T        | C79F             | M1 | T | B | 1.15   |
| 2  | 141283848 | 141283848 | LRP1B          | low density lipoprotein recept     | NM_018557      | G | A  | stopgain          | C7834T       | Q2612X           | M1 | T |   | 5.08   |
| 2  | 141526900 | 141526900 | LRP1B          | low density lipoprotein recept     | NM_018557      | A | T  | nonsynonymous SNV | T5640A       | F1880L           | M1 | T | D | 1.93   |
| 2  | 233199157 | 233199157 | DIS3L2         | DIS3 like 3'-5' exoribonuclea      | NM_152383      | C | T  | nonsynonymous SNV | C2237T       | S746F            | M1 | D | D | 3.93   |
| 20 | 3624876   | 3624876   | ATRN           | attractin                          | NM_139321      | C | T  | nonsynonymous SNV | C4126T       | P1376S           | M1 | D | P | 5.26   |
| 20 | 41076951  | 41076951  | PTPRT          | protein tyrosine phosphatase       | NM_133170.3    | A | G  | nonsynonymous SNV | T1469C       | L490P            | M1 | T | P | 5.88   |
| 20 | 744308    | 744308    | SLC52A3        | solute carrier family 52 (ribofl   | NM_033409      | T | C  | nonsynonymous SNV | A907G        | I303V            | M1 | D | D | 4.95   |
| 22 | 24560375  | 24560375  | CABIN1         | calcineurin binding protein 1      | NM_001199281.1 | G | A  | stopgain          | G4754A       | W1585X           | M1 | T |   | 4.65   |
| 22 | 37692041  | 37692041  | CYTH4          | cytohesin 4                        | NM_013385      | C | T  | nonsynonymous SNV | T169T        | R57W             | M1 | D | D | 4.01   |
| 22 | 39078990  | 39078990  | TOMM22         | translocase of outer mitochor      | NM_020243      | C | A  | nonsynonymous SNV | C343A        | Q115K            | M1 | T | P | 5.36   |
| 22 | 39497404  | 39497404  | APOBEC3H       | apolipoprotein B mRNA editin       | NM_001166003.2 | G | C  | nonsynonymous SNV | G313C        | G105R            | M1 | T | B | -4.63  |
| 3  | 111639187 | 111639187 | PHLDB2         | pleckstrin homology-like dom       | NM_001134438.1 | T | C  | nonsynonymous SNV | T1922C       | M641T            | M1 | T | B | 5.13   |
| 3  | 125648356 | 125648356 | ALG1L          | ALG1, chitobiosylidiphosphod       | NM_001195223.1 | T | C  | nonsynonymous SNV | A463G        | N155D            | M1 | T | B | 2.3    |
| 3  | 128623338 | 128623338 | ACAD9          | acyl-CoA dehydrogenase far         | NM_014049      | C | A  | nonsynonymous SNV | C1139A       | A380D            | M1 | D | D | 5.7    |
| 3  | 167742718 | 167742718 | GOLIM4         | golgi integral membrane prot       | NM_014498      | C | A  | nonsynonymous SNV | G1789T       | V597L            | M1 | T | P | 5.02   |
| 3  | 187446196 | 187446196 | BCL6           | B-cell CLL/lymphoma 6              | NM_001706.4    | G | A  | nonsynonymous SNV | C1492T       | A204D            | M1 | T | B | 4.1    |
| 3  | 195452018 | 195452018 | MUC20          | mucin 20, cell surface associ      | NM_001282506   | A | G  | nonsynonymous SNV | A544G        | S182G            | M1 | T | P | -1.67  |
| 3  | 46490500  | 46490500  | LTF            | lactotransferrin                   | NM_002343.4    | C | T  | nonsynonymous SNV | G1066A       | E356K            | M1 | T | B | 1.46   |
| 3  | 52823719  | 52823719  | ITIH1          | inter-alpha-trypsin inhibitor h    | NM_002215.3    | C | A  | nonsynonymous SNV | C2170A       | Q724K            | M1 | T | B | -1.36  |
| 4  | 39450229  | 39450229  | KLB            | Klotho beta                        | NM_175737      | C | A  | nonsynonymous SNV | C3058A       | Q1020K           | M1 | T | B | 2.81   |
| 4  | 55972974  | 55972974  | KDR            | Kinase insert domain recepto       | NM_002253      | T | A  | nonsynonymous SNV | A1416T       | Q472H            | M1 | T | P | -1.82  |
| 4  | 57797375  | 57797375  | REST           | RE-1-silencing transcription fa    | NM_005612      | C | T  | nonsynonymous SNV | C2351T       | P784L            | M1 | T | B | 0.413  |
| 4  | 677003    | 677003    | MFSD7          | Major facilitator superfamily d    | NM_032219      | G | T  | nonsynonymous SNV | C1147A       | L383M            | M1 | T | D | 1.145  |
| 5  | 127647634 | 127647634 | FBN2           | Fibrillin 2                        | NM_001999      | T | A  | nonsynonymous SNV | A4891T       | T1631S           | M1 | T | P | 6.07   |
| 5  | 141244356 | 141244356 | PCDH1          | Protocadherin 1                    | NM_032420      | C | T  | nonsynonymous SNV | G1540A       | A514T            | M1 | T | B | 3.87   |
| 5  | 16680198  | 16680198  | MYO10          | Myosin X                           | NM_012334      | G | T  | nonsynonymous SNV | C4400A       | T1467N           | M1 | D | P | 5.46   |
| 5  | 75954287  | 75954287  | IQGAP2         | Q motif containing GTPase a        | NM_006633      | G | T  | nonsynonymous SNV | G2324T       | G775V            | M1 | T | B | 3.9    |
| 5  | 76332468  | 76332468  | AGGF1          | Angiogenic factor with G patc      | NM_018046      | G | T  | nonsynonymous SNV | G604T        | V202L            | M1 |   | B | 5.09   |
| 5  | 96098057  | 96098057  | CAST           | Calpastatin                        | NM_001042440   | C | G  | nonsynonymous SNV | T1790G       | A597G            | M1 | T | B | 0.31   |
| 6  | 100868779 | 100868779 | SIM1           | Single-minded family bHLH tr       | NM_005068      | G | T  | nonsynonymous SNV | C1054A       | P352T            | M1 | T | B | 5.8    |
| 6  | 127898617 | 127898617 | C6orf58        | Chromosome 6 open reading          | NM_001010905   | G | T  | nonsynonymous SNV | G287T        | W96L             | M1 | D | D | 5.24   |
| 6  | 152668349 | 152668349 | SYNE1          | Spectrin repeat containing, nu     | NM_182961      | C | A  | nonsynonymous SNV | G11923T      | G3975C           | M1 | T | P | 3.11   |
| 6  | 158342607 | 158342607 | SNX9           | Sorting nexin 9                    | NM_016224      | C | T  | stopgain          | C994T        | Q332X            | M1 |   |   |        |
| 6  | 168351906 | 168351906 | MLLT4          | myeloid/lymphoid or mixed-lir      | NM_001291964   | C | A  | nonsynonymous SNV | C3728A       | A1243D           | M1 | T | B | 1.48   |
| 6  | 32809352  | 32809352  | PSMB8          | Proteasome (prosome, macr          | NM_004159      | G | T  | nonsynonymous SNV | C686A        | A229D            | M1 | D | P | -0.706 |
| 6  | 3290037   | 3290037   | SLC22A23       | solute carrier family 22, mem      | NM_015482      | C | T  | nonsynonymous SNV | G1274A       | R425Q            | M1 | D | P | 4.33   |
| 6  | 56482141  | 56482141  | DST            | Dystonin                           | NM_001723      | C | A  | nonsynonymous SNV | G6124T       | A2042S           | M1 | T | B | -0.633 |
| 7  | 100680401 | 100680401 | MUC17          | Mucin 17, Cell Surface Assoc       | NM_001040105   | G | T  | nonsynonymous SNV | G5704T       | A1902S           | M1 | T | B | -2.38  |
| 7  | 107669572 | 107669572 | LAMB4          | Laminin, Beta 4                    | NM_007356      | C | T  | nonsynonymous SNV | G5062A       | E1688K           | M1 | T | B | 2.71   |
| 7  | 116869894 | 116869894 | ST7            | Suppression Of Tumorigenicit       | NM_018412      | C | A  | nonsynonymous SNV | C1648A       | Q550K            | M1 | T | D | 5.4    |
| 7  | 137150753 | 137150753 | DGKI           | Diacylglycerol Kinase, lota        | NM_004717      | G | A  | nonsynonymous SNV | C2537T       | S846F            | M1 | D | P | 5.82   |
| 7  | 142630534 | 142630534 | TRPV5          | Transient Receptor Potential       | NM_019841      | G | A  | nonsynonymous SNV | C23T         | A8V              | M1 | T | B | -1.91  |
| 7  | 79842048  | 79842048  | GNAI1          | Guanine nucleotide binding p       | NM_002069      | G | T  | nonsynonymous SNV | G737T        | S246I            | M1 |   | D | 6.17   |
| 8  | 101054142 | 101054142 | RGS22          | regulator of G-protein signalr     | NM_015668      | G | A  | nonsynonymous SNV | C1826T       | S609L            | M1 |   |   |        |
| 8  | 106814615 | 106814615 | ZFPM2          | Zinc finger protein, FOG fami      | NM_012082      | C | T  | nonsynonymous SNV | C2305T       | P769S            | M1 | T | B | 4.83   |
| 8  | 145998769 | 145998769 | ZNF34          | Zinc finger protein 34             | NM_030580      | C | A  | nonsynonymous SNV | G1565T       | R522L            | M1 | T | B | -1.62  |
| 8  | 146107670 | 146107670 | ZNF250         | zinc finger protein 250            | NM_021061      | G | A  | nonsynonymous SNV | C913T        | H305Y            | M1 | D | D | 3.94   |
| 9  | 137620555 | 137620555 | COL5A1         | Collagen, type V, alpha 1          | NM_000093      | G | A  | nonsynonymous SNV | G826A        | E276K            | M1 | T | D | 4.24   |
| 9  | 139302388 | 139302388 | SDCCAG3        | Serologically defined colon ca     | NM_001039707   | C | A  | nonsynonymous SNV | G292T        | D98Y             | M1 | D | D | 5.34   |
| 9  | 79324872  | 79324872  | PRUNE2         | Prune homolog 2                    | NM_015225      | C | A  | nonsynonymous SNV | G2318T       | R773L            | M1 | D | B | -3.06  |
| X  | 102842229 | 102842229 | TCEAL4         | Transcription elongation fact      | NM_001300901   | T | C  | nonsynonymous SNV | T1055C       | I352T            | M1 | T | B | -0.255 |
| X  | 151092653 | 151092653 | MAGEA4         | Melanoma antigen family A4         | NM_001011550   | G | A  | nonsynonymous SNV | G517A        | A173T            | M1 |   |   | -0.42  |
| X  | 30326904  | 30326904  | NR0B1          | Nuclear receptor subfamily 0,      | NM_000475      | T | A  | nonsynonymous SNV | A577T        | T193S            | M1 | T | B | -9.23  |
| X  | 3228309   | 3228309   | MXRA5          | Matrix-remodelling associat        | NM_015419      | G | T  | nonsynonymous SNV | C7935A       | N2645K           | M1 | T | P | -0.242 |
| X  | 49355893  | 49355893  | GAGE2A         | G antigen 2A                       | NM_001127212   | C | G  | nonsynonymous SNV | C175G        | Q59E             | M1 | T | B | -1.69  |
| X  | 9707575   | 9707575   | GPR143         | G protein-coupled receptor 14      | NM_000273      | G | T  | nonsynonymous SNV | C1070A       | S357Y            | M1 | D | P | -8.94  |
| 1  | 248801602 | 248801602 | OR2T35         | Olfactory Receptor Family 2, 3     | NM_001001827   | 0 | CA | stopgain          | 957_958insTG | I320_R321delinsX | M1 |   |   |        |
| 13 | 46170839  | 46170839  | ERICH6B        | Glutamate-Rich 6B                  | NM_182542      | G | T  | nonsynonymous SNV | C302A        | A101E            | M1 | D | B | -6.51  |
| 2  | 113588140 | 113588140 | IL1B           | Interleukin 1, Beta                | NM_000576      | G | T  | nonsynonymous SNV | C608A        | P203H            | M1 | T | D | 3.63   |

|    |           |           |          |                                                |                |   |   |                   |         |         |     |   |   |        |
|----|-----------|-----------|----------|------------------------------------------------|----------------|---|---|-------------------|---------|---------|-----|---|---|--------|
| 3  | 195452870 | 195452870 | MUC20    | Mucin20                                        | NM_001282506   | G | A | nonsynonymous SNV | G1396A  | E466K   | M1  | T | B | 2.47   |
| 2  | 179449692 | 179449692 | TTN      | Titin                                          | NM_001267560   | G | C | nonsynonymous SNV | C64676G | A21559G | M1  | D | B | 5.3    |
| 15 | 89398295  | 89398295  | ACAN     | aggregran                                      | NM_013227      | A | T | stopgain          | A2479T  | K827X   | M1  | T |   | -3.62  |
| 16 | 848780    | 848780    | GNB1     | guanine nucleotide binding protein 1           | NM_016541      | A | T | nonsynonymous SNV | T143A   | L48Q    | M1  | D | D | 5.07   |
| 2  | 113588132 | 113588132 | IL1B     | Interleukin 1, Beta                            | NM_000576      | A | A | nonsynonymous SNV | T616A   | Y206N   | M1  | T | D | 2.95   |
| 3  | 195452872 | 195452872 | MUC20    | Mucin20                                        | NM_001282506   | A | C | nonsynonymous SNV | A1398C  | E466D   | M1  | T | B | -3.24  |
| 3  | 195452873 | 195452873 | MUC20    | Mucin20                                        | NM_001282506   | G | A | nonsynonymous SNV | G1399A  | A467T   | M1  | T | P | 2.42   |
| 1  | 145296373 | 145296373 | NBPF10   | Neuroblastoma Breakpoint Family 10             | NM_001039703   | G | T | nonsynonymous SNV | G295T   | V99F    | M1  | D |   | -158   |
| 1  | 1018290   | 1018290   | C1orf159 | chromosome 1 open reading frame 159            | NM_017891      | G | A | nonsynonymous SNV | C580T   | R194C   | M11 | D | D | 3.29   |
| 1  | 10239498  | 10239498  | UBE4B    | ubiquitination factor E4B                      | NM_001105562.2 | C | A | nonsynonymous SNV | C3725A  | T1242K  | M11 | T | P | 5.78   |
| 1  | 111060917 | 111060917 | KCNA10   | potassium channel, voltage-gated               | NM_005549      | C | T | nonsynonymous SNV | G493A   | E165K   | M11 | D | D | 5.93   |
| 1  | 11893615  | 11893615  | CLCN6    | chloride channel, voltage-sensitive            | NM_001286.3    | C | T | nonsynonymous SNV | C1292T  | P431L   | M11 | D | B | 5.78   |
| 1  | 13183631  | 13183631  | HNRNPCL2 | heterogeneous nuclear ribonucleoprotein C2     | NM_001136561   | A | T | nonsynonymous SNV | T242A   | V81D    | M11 |   |   |        |
| 1  | 145561870 | 145561870 | ANKRD35  | ankyrin repeat domain 35                       | NM_144698.4    | G | A | nonsynonymous SNV | G1558A  | G520R   | M11 | T | B | 4.31   |
| 1  | 149901053 | 149901053 | MTMR11   | myotubularin related protein 11                | NM_001145862.1 | G | A | nonsynonymous SNV | C2098T  | L700F   | M11 | T | B | 0.6    |
| 1  | 150676620 | 150676620 | HORMAD1  | HORMA domain containing 1                      | NM_032132.4    | G | A | nonsynonymous SNV | C922T   | P308S   | M11 | T | B | 3.66   |
| 1  | 152129137 | 152129137 | RPTN     | repetin                                        | NM_001122965   | A | T | nonsynonymous SNV | T438A   | H146Q   | M11 | T | B | -3.44  |
| 1  | 152284648 | 152284648 | FLG      | filaggrin                                      | NM_002016      | C | T | nonsynonymous SNV | G2714A  | G905D   | M11 | T | P | 0.822  |
| 1  | 158990263 | 158990263 | IFI16    | interferon, gamma-inducible factor 16          | NM_001206567.1 | C | T | nonsynonymous SNV | C937T   | L313F   | M11 | D | D | -0.713 |
| 1  | 159410507 | 159410507 | OR10J1   | olfactory receptor, family 10, subfamily 1     | NM_012351      | C | T | nonsynonymous SNV | C959T   | S320F   | M11 | D | D | 0.596  |
| 1  | 159558349 | 159558349 | APCS     | amyloid P component, serum                     | NM_001639      | G | A | nonsynonymous SNV | G523A   | D175N   | M11 | T | D | 3.33   |
| 1  | 161137789 | 161137789 | PPOX     | protoporphyrinogen oxidase                     | NM_000309.3    | C | A | nonsynonymous SNV | C343A   | L115I   | M11 | T | B | 4.63   |
| 1  | 17275337  | 17275337  | CROCC    | ciliary rootlet coiled-coil, rootlet           | NM_014675      | C | T | nonsynonymous SNV | C2752T  | R918W   | M11 | D | D | 2.36   |
| 1  | 202861672 | 202861672 | KLHL12   | kelch-like family member 12                    | NM_021633      | G | A | nonsynonymous SNV | C1696T  | R566C   | M11 | D | P | 5.27   |
| 1  | 215955491 | 215955491 | USH2A    | Usher syndrome 2A (autosomal recessive)        | NM_006933      | G | A | nonsynonymous SNV | C10633T | R3545W  | M11 | D | P | 3.62   |
| 1  | 223986173 | 223986173 | TP53BP2  | tumor protein p53 binding protein 2            | NM_001031685   | G | T | nonsynonymous SNV | C1692A  | S564R   | M11 | T | B | -5.07  |
| 1  | 240371146 | 240371146 | FMN2     | formin 2                                       | NM_020066      | C | T | nonsynonymous SNV | C3034T  | P1012S  | M11 |   | P | 2.53   |
| 1  | 24385467  | 24385467  | MYO3     | myomesin 3                                     | NM_152372      | G | A | nonsynonymous SNV | C3997T  | R1333C  | M11 | D | D | 4.64   |
| 1  | 24426228  | 24426228  | MYO3     | myomesin 3                                     | NM_152372      | G | A | nonsynonymous SNV | C598T   | R200C   | M11 | T | B | 4.81   |
| 1  | 248487736 | 248487736 | OR2M7    | olfactory receptor, family 2, subfamily 7      | NM_001004691   | C | T | nonsynonymous SNV | G135A   | M45I    | M11 | T | B | 1.55   |
| 1  | 248551026 | 248551026 | OR2T6    | olfactory receptor, family 2, subfamily 6      | NM_001005471   | G | A | nonsynonymous SNV | G117A   | M39I    | M11 | T | B | -1.34  |
| 1  | 27648704  | 27648704  | TMEM222  | transmembrane protein 222                      | NM_032125      | G | A | nonsynonymous SNV | G16A    | G6R     | M11 | D | B | 3.63   |
| 1  | 36068927  | 36068927  | PSMB2    | proteasome (prosome, macropain) subunit type 2 | NM_002794.4    | T | G | nonsynonymous SNV | A547C   | I183L   | M11 | D | B | 5.82   |
| 1  | 47767944  | 47767944  | STIL     | SCL/TAL1 interrupting locus                    | NM_001048166.1 | G | A | nonsynonymous SNV | C227T   | S76L    | M11 | T | B | 3.12   |
| 1  | 48701511  | 48701511  | SLC5A9   | solute carrier family 5 (sodium-dependent)     | NM_001135181.1 | C | T | nonsynonymous SNV | C1327T  | R443C   | M11 | D | D | 5.73   |
| 1  | 84878115  | 84878115  | DNASE2B  | deoxyribonuclease II beta                      | NM_021233.2    | C | T | stopgain          | C631T   | Q211X   | M11 | T |   | 4.51   |
| 1  | 86965508  | 86965508  | CLCA1    | chloride channel accessory 1                   | NM_001285      | T | C | nonsynonymous SNV | T2525C  | I842T   | M11 | D | D | 5.59   |
| 1  | 94543278  | 94543278  | ABCA4    | ATP-binding cassette, subfamily 4              | NM_000350      | G | A | nonsynonymous SNV | C1522T  | R508C   | M11 | T | P | 4.29   |
| 1  | 97770838  | 97770838  | DPYD     | dihydropyrimidine dehydrogenase                | NM_000110      | C | T | nonsynonymous SNV | G2276A  | R759Q   | M11 | D | B | 4.41   |
| 10 | 11505566  | 11505566  | USP6NL   | USP6 N-terminal like                           | NM_001080491.3 | G | A | nonsynonymous SNV | C1412T  | P471L   | M11 | D | B | 5.74   |
| 10 | 25273722  | 25273722  | ENKUR    | enkurin, TRPC channel interacting              | NM_145010.3    | T | G | nonsynonymous SNV | A707C   | Q236P   | M11 | D | D | 4.98   |
| 10 | 28228936  | 28228936  | ARMC4    | armadillo repeat containing 4                  | NM_001290020.1 | C | T | nonsynonymous SNV | G1987A  | E663K   | M11 | T | B | 5.53   |
| 10 | 29840139  | 29840139  | SVIL     | supervillin                                    | NM_021738.2    | G | A | stopgain          | C214T   | R72X    | M11 |   |   | 4.45   |
| 10 | 52569793  | 52569793  | A1CF     | APOBEC1 complementation factor                 | NM_001198819.1 | G | T | nonsynonymous SNV | C1518A  | F506L   | M11 | T | P | 4      |
| 10 | 6553150   | 6553150   | PRKCC    | protein kinase C, theta                        | NM_006257.4    | C | T | nonsynonymous SNV | G125A   | G42E    | M11 | T | D | 5.33   |
| 10 | 76857491  | 76857491  | DUSP13   | dual specificity phosphatase 13                | NM_001007273   | G | A | nonsynonymous SNV | C431T   | P144L   | M11 | D | D | 5.9    |
| 10 | 7745400   | 7745400   | ITIH2    | inter-alpha-trypsin inhibitor heavy chain 2    | NM_002216      | G | A | nonsynonymous SNV | G3A     | M1I     | M11 | D | D | 5.66   |
| 10 | 96985083  | 96985083  | ACSM6    | acyl-CoA synthetase medium chain               | NM_207321      | G | A | nonsynonymous SNV | G1237A  | E413K   | M11 | T | B |        |
| 11 | 123909219 | 123909219 | OR10G7   | olfactory receptor, family 10, subfamily 7     | NM_001004463   | G | A | nonsynonymous SNV | C490T   | H164Y   | M11 | D | P | 1.34   |
| 11 | 124764204 | 124764204 | ROBO4    | roundabout guidance receptor 4                 | NM_019055.5    | G | A | nonsynonymous SNV | C1211T  | T404I   | M11 | T | D | 4.93   |
| 11 | 22399062  | 22399062  | SLC17A6  | solute carrier family 17 (vesicular)           | NM_020346      | G | A | nonsynonymous SNV | G1525A  | E509K   | M11 | T | B | 5.85   |
| 11 | 5443735   | 5443735   | OR51Q1   | olfactory receptor, family 51, subfamily 1     | NM_001004757   | A | C | nonsynonymous SNV | A305C   | Q102P   | M11 | D | D | 5      |
| 11 | 5462717   | 5462717   | OR511    | olfactory receptor, family 51, subfamily 1     | NM_001005288   | G | A | stopgain          | C28T    | Q10X    | M11 | T |   | 5.75   |
| 11 | 57243942  | 57243942  | RTN4RL2  | reticulon 4 receptor-like 2                    | NM_178570      | C | A | nonsynonymous SNV | C821A   | A274D   | M11 | T | B | 4.36   |
| 11 | 63175679  | 63175679  | SLC22A9  | solute carrier family 22 (organic anion)       | NM_080866      | C | T | nonsynonymous SNV | C1384T  | P462S   | M11 | D | D | 2.46   |
| 11 | 64120647  | 64120647  | CCDC88B  | coiled-coil domain containing 88B              | NM_032251      | C | T | stopgain          | C3622T  | Q1208X  | M11 | T |   | 4.14   |
| 11 | 6943099   | 6943099   | OR2D3    | olfactory receptor, family 2, subfamily 3      | NM_001004684   | G | A | nonsynonymous SNV | G867A   | M289I   | M11 | T | B | 4.02   |
| 11 | 7064674   | 7064674   | NLRP14   | NLR family, pyrin domain containing 14         | NM_176822      | G | A | nonsynonymous SNV | G1417A  | E473K   | M11 | T | D | 2.47   |
| 11 | 72409141  | 72409141  | ARAP1    | ArfGAP with RhoGAP domain 1                    | NM_001040118.2 | G | A | nonsynonymous SNV | C2552T  | P851L   | M11 | D | B | 5.44   |
| 11 | 72409142  | 72409142  | ARAP1    | ArfGAP with RhoGAP domain 1                    | NM_001040118.2 | G | A | nonsynonymous SNV | C2551T  | P851S   | M11 | D | D | 4.53   |
| 11 | 75298775  | 75298775  | MAP6     | microtubule-associated protein 6               | NM_033063      | A | T | nonsynonymous SNV | T1771A  | S591T   | M11 | T | B | -0.357 |
| 11 | 76915147  | 76915147  | MYO7A    | myosin VIIA                                    | NM_000260.3    | C | T | nonsynonymous SNV | C5353T  | P1785S  | M11 | D | D | 4.84   |
| 11 | 829467    | 829467    | CRACR2B  | calcium release activated calcium channel 2B   | NM_001286606.1 | G | T | nonsynonymous SNV | G385T   | D129Y   | M11 | D | P | 4.15   |
| 11 | 94862169  | 94862169  | ENDOD1   | endonuclease domain containing 1               | NM_015036      | G | A | nonsynonymous SNV | G929A   | S310N   | M11 | T | B | 1.83   |
| 12 | 102155397 | 102155397 | GNPTAB   | N-acetylglucosamine-1-phosphotransferase B     | NM_024312      | G | A | nonsynonymous SNV | C2860T  | P954S   | M11 | D | D | 5.86   |
| 12 | 104102233 | 104102233 | STAB2    | stabilin 2                                     | NM_017564      | C | T | nonsynonymous SNV | C4207T  | H1403Y  | M11 | T | P | 5.4    |
| 12 | 119588962 | 119588962 | SRRM4    | serine/arginine repetitive matrix 4            | NM_194286      | G | A | nonsynonymous SNV | G1217A  | R406Q   | M11 |   | B | 2.63   |

|    |           |           |              |                                                                             |                |   |   |                   |         |        |     |   |   |        |
|----|-----------|-----------|--------------|-----------------------------------------------------------------------------|----------------|---|---|-------------------|---------|--------|-----|---|---|--------|
| 12 | 122398578 | 122398578 | WDR66        | WD repeat domain 66                                                         | NM_144668.5    | C | T | nonsynonymous SNV | C2221T  | R741C  | M11 | T | P | 3.87   |
| 12 | 124229490 | 124229490 | ATP6V0A2     | ATPase, H+ transporting, lysosomal                                          | NM_012463      | C | T | stopgain          | C1576T  | R526X  | M11 | T |   | 3.86   |
| 12 | 125455916 | 125455916 | DHX37        | DEAH (Asp-Glu-Ala-His) box                                                  | NM_032856      | G | A | nonsynonymous SNV | C1123T  | H375Y  | M11 | D | D | 5.22   |
| 12 | 18891674  | 18891674  | CAPZA3       | capping protein (actin filament)                                            | NM_033328      | C | T | nonsynonymous SNV | C472T   | H158Y  | M11 | D | P | 3.95   |
| 12 | 21918865  | 21918865  | KCNJ8        | potassium channel, inwardly rectifying                                      | NM_004982      | C | T | nonsynonymous SNV | G1067A  | R356Q  | M11 | D | B | 5.55   |
| 12 | 27152555  | 27152555  | TM7SF3       | transmembrane 7 superfamily                                                 | NM_016551      | G | A | nonsynonymous SNV | C301T   | L101F  | M11 | D | D | 3.49   |
| 12 | 48368002  | 48368002  | COL2A1       | collagen, type II, alpha 1                                                  | NM_001844.4    | C | T | nonsynonymous SNV | G4187A  | S1396N | M11 | D | D | 5.06   |
| 12 | 4848488   | 4848488   | GALNT8       | polypeptide N-acetylgalactosyltransferase 8                                 | NM_017417      | C | A | nonsynonymous SNV | C669A   | S223R  | M11 | D | D | 1.53   |
| 12 | 51773216  | 51773216  | GALNT6       | polypeptide N-acetylgalactosyltransferase 6                                 | NM_007210      | C | T | nonsynonymous SNV | G350A   | G117E  | M11 | D | D | 4.52   |
| 12 | 58114649  | 58114649  | OS9          | osteosarcoma amplified 9, early                                             | NM_006812.3    | C | T | nonsynonymous SNV | C1961T  | P654L  | M11 | T | B | -10.6  |
| 12 | 9980190   | 9980190   | KLRF1        | killer cell lectin-like receptor subfamily 1 member 1                       | NM_016523.2    | G | A | nonsynonymous SNV | G50A    | R17K   | M11 |   | P | -0.447 |
| 13 | 103389530 | 103389530 | CCDC168      | coiled-coil domain containing 168                                           | NM_001146197   | C | T | nonsynonymous SNV | G13517A | G4506E | M11 |   |   |        |
| 13 | 110804750 | 110804750 | COL4A1       | collagen, type IV, alpha 1                                                  | NM_001845      | C | T | nonsynonymous SNV | G4859A  | G1620E | M11 | D | D | 5.51   |
| 13 | 111143607 | 111143607 | COL4A2       | collagen, type IV, alpha 2                                                  | NM_001846      | G | A | nonsynonymous SNV | G3374A  | G1125E | M11 | D | D | 5.04   |
| 13 | 114758024 | 114758024 | RASA3        | RAS p21 protein activator 3                                                 | NM_007368      | G | A | nonsynonymous SNV | C2182T  | R728C  | M11 |   | 0 | 5.05   |
| 13 | 28877356  | 28877356  | FLT1         | fms-related tyrosine kinase 1                                               | NM_002019      | G | C | nonsynonymous SNV | C3965G  | S1322C | M11 | D | P | 4.21   |
| 13 | 32355867  | 32355867  | RXFP2        | relaxin/insulin-like family peptide receptor 2                              | NM_130806.3    | C | T | nonsynonymous SNV | C845T   | S282L  | M11 | T | B | 3.83   |
| 13 | 32885862  | 32885862  | ZAR1L        | zygote arrest 1-like                                                        | NM_001136571   | C | A | nonsynonymous SNV | G201T   | Q67H   | M11 | D | B | 2.17   |
| 13 | 36229748  | 36229748  | NBEA         | neurobeachin                                                                | NM_015678      | G | A | nonsynonymous SNV | G8161A  | D2721N | M11 | D | D | 6.06   |
| 13 | 46287470  | 46287470  | SPERT        | spermatid associated                                                        | NM_152719.2    | G | A | nonsynonymous SNV | G310A   | E104K  | M11 | T | D | 5.1    |
| 13 | 49281381  | 49281381  | CYSLTR2      | cysteinyln leukotriene receptor                                             | NM_020377      | C | T | nonsynonymous SNV | C428T   | P143L  | M11 | D | D | 5.89   |
| 14 | 105419084 | 105419084 | AHNAK2       | AHNAK nucleoprotein 2                                                       | NM_138420      | G | A | nonsynonymous SNV | C2704T  | P902S  | M11 | T | P | -6.96  |
| 14 | 19553526  | 19553526  | POTEG        | POTE ankyrin domain family, member 1                                        | NM_001005356   | G | A | nonsynonymous SNV | G110A   | G37E   | M11 | T | B | 0      |
| 14 | 20770112  | 20770112  | TTC5         | tetratricopeptide repeat domain containing 5                                | NM_138376      | G | A | stopgain          | C64T    | Q22X   | M11 |   |   | 4.48   |
| 14 | 24537864  | 24537864  | LRRC16B      | leucine rich repeat containing 16B                                          | NM_138360      | G | A | nonsynonymous SNV | G3754A  | E1252K | M11 | T | P | 4.17   |
| 14 | 50558457  | 50558457  | C14orf183    | long intergenic non-protein coding RNA 183                                  | NM_001014830   | C | A | nonsynonymous SNV | G111T   | Q37H   | M11 | D | D | 2.72   |
| 14 | 51080016  | 51080016  | ATL1         | atlastin GTPase 1                                                           | NM_015915.4    | G | A | nonsynonymous SNV | G670A   | E224K  | M11 | T | P | 5.41   |
| 14 | 58690508  | 58690508  | ACTR10       | actin-related protein 10 homolog 10                                         | NM_018477      | C | G | nonsynonymous SNV | C272G   | S241C  | M11 | T | P | 3.9    |
| 14 | 81046750  | 81046750  | CEP128       | centrosomal protein 128kDa                                                  | NM_152446      | G | A | stopgain          | C2824T  | Q942X  | M11 | T |   | 5.73   |
| 14 | 91739484  | 91739484  | CCDC88C      | coiled-coil domain containing 88C                                           | NM_001080414   | G | A | nonsynonymous SNV | C5572T  | R1858W | M11 | D | D | 3.86   |
| 14 | 92268705  | 92268705  | TC2N         | tandem C2 domains, nuclear                                                  | NM_152332.5    | C | T | nonsynonymous SNV | G362A   | G121E  | M11 | T | B | 4.47   |
| 14 | 94754765  | 94754765  | SERPINA10    | serpin peptidase inhibitor, clade A, member 10                              | NM_016186.2    | G | A | nonsynonymous SNV | C850T   | R284C  | M11 | T | P | 3.44   |
| 14 | 97022743  | 97022743  | PAPOLA       | poly(A) polymerase alpha                                                    | NM_032632.4    | C | A | nonsynonymous SNV | C1997A  | T666K  | M11 | T | B | 4.3    |
| 15 | 62944246  | 62944246  | TLN2         | talín 2                                                                     | NM_015059      | C | T | nonsynonymous SNV | C277T   | R93W   | M11 | D | B | 5.92   |
| 15 | 65489182  | 65489182  | CILP         | cartilage intermediate layer protein 1                                      | NM_003613      | C | T | nonsynonymous SNV | G3442A  | G1148R | M11 | T | B | 3.97   |
| 15 | 73023725  | 73023725  | BBS4         | Bardet-Biedl syndrome 4                                                     | NM_03028.4     | G | N | nonsynonymous SNV | G3028T  | C264F  | M11 | D | B | 1.87   |
| 15 | 73616228  | 73616228  | HCN4         | hyperpolarization activated cyclic nucleotide-gated channel 4               | NM_005477      | A | T | nonsynonymous SNV | T2206A  | Y736N  | M11 | T | P | 3.46   |
| 15 | 79067065  | 79067065  | ADAMTS7      | ADAM metalloproteinase with thrombospondin type 1 motifs 7                  | NM_014272      | G | A | nonsynonymous SNV | C1777T  | P593S  | M11 | T | P | 3.51   |
| 15 | 98984374  | 98984374  | FAM169B      | family with sequence similarity 169B                                        | NM_182562      | C | T | nonsynonymous SNV | G385A   | E129K  | M11 | D | B | -0.446 |
| 16 | 14988889  | 14988889  | NOMO1        | NODAL modulator 1                                                           | NM_014287      | C | T | nonsynonymous SNV | C3479T  | S1160F | M11 | D | D | 2.96   |
| 16 | 20999357  | 20999357  | DNAH3        | dynein, axonemal, heavy chain 3                                             | NM_017539      | G | A | nonsynonymous SNV | C6632T  | S2211F | M11 | T | D | 5.09   |
| 16 | 2104297   | 2104297   | TSC2         | tuberous sclerosis 2                                                        | NM_000548.3    | G | A | nonsynonymous SNV | G337A   | G113S  | M11 |   | D | 4.02   |
| 16 | 2104298   | 2104298   | TSC2         | tuberous sclerosis 2                                                        | NM_000548.3    | G | A | nonsynonymous SNV | G338A   | G113D  | M11 | T | D | 4.01   |
| 16 | 21063054  | 21063054  | DNAH3        | dynein, axonemal, heavy chain 3                                             | NM_017539      | C | T | nonsynonymous SNV | G4175A  | G1392D | M11 | D | D | 5.78   |
| 16 | 29883590  | 29883590  | SEZ6L2       | seizure related 6 homolog (mouse)                                           | NM_001243332.1 | G | A | nonsynonymous SNV | C2660T  | S887F  | M11 | D | D | 5.43   |
| 16 | 30545601  | 30545601  | ZNF747       | zinc finger protein 747                                                     | NM_023931      | G | A | nonsynonymous SNV | C400T   | P134S  | M11 | T | P | 0.042  |
| 16 | 4414299   | 4414299   | CORO7, CORO7 | CORO7-PAM16 readthrough                                                     | NM_001201479.1 | G | A | nonsynonymous SNV | C1253T  | P418L  | M11 | T | B | 3.78   |
| 16 | 53337880  | 53337880  | CHD9         | chromodomain helicase DNA binding protein 9                                 | NM_025134      | C | T | nonsynonymous SNV | C5962T  | R1988C | M11 | D | D | 6.16   |
| 16 | 56974084  | 56974084  | HERPUD1      | homocysteine-inducible, endoplasmic reticulum chaperone domain containing 1 | NM_014685.3    | C | T | nonsynonymous SNV | C832T   | L278F  | M11 | T | D | 5.74   |
| 16 | 57994779  | 57994779  | CNGB1        | cyclic nucleotide-gated channel beta 1                                      | NM_001297.4    | C | T | nonsynonymous SNV | G499A   | E167K  | M11 | D | B | 3.67   |
| 16 | 66919622  | 66919622  | PDP2         | pyruvate dehydrogenase phosphatase 2                                        | NM_020786      | A | T | nonsynonymous SNV | A1435T  | I479F  | M11 | D | P | 3.4    |
| 16 | 67270563  | 67270563  | FHOD1        | formin homology 2 domain containing 1                                       | NM_013241      | T | G | nonsynonymous SNV | A1216C  | S406R  | M11 | T | B | 2.91   |
| 16 | 71007323  | 71007323  | HYDIN        | HYDIN, axonemal central pair                                                | NM_001270974   | C | T | nonsynonymous SNV | G5302A  | E1768K | M11 | T | P | 4.35   |
| 16 | 71008524  | 71008524  | HYDIN        | HYDIN, axonemal central pair                                                | NM_001270974   | C | T | nonsynonymous SNV | G4822A  | E1608K | M11 | T | B | 3.69   |
| 16 | 71423754  | 71423754  | CALB2        | calbindin 2                                                                 | NM_001740      | G | A | nonsynonymous SNV | G802A   | E268K  | M11 | T | B | 5.35   |
| 16 | 75146500  | 75146500  | LDHD         | lactate dehydrogenase D                                                     | NM_153486.3    | C | T | nonsynonymous SNV | G1358A  | R453K  | M11 |   | P | 5.51   |
| 17 | 10304066  | 10304066  | MYH8         | myosin, heavy chain 8, skeletal muscle, non-ventricular                     | NM_002472      | C | T | nonsynonymous SNV | G3376A  | E1126K | M11 | D | D | 4.41   |
| 17 | 10346712  | 10346712  | MYH4         | myosin, heavy chain 4, skeletal muscle, ventricular                         | NM_017533      | T | A | stopgain          | A5800T  | K1934X | M11 | T |   | 5.19   |
| 17 | 15522641  | 15522641  | CDRT1        | CMT1A duplicated region transcribed                                         | NM_006382.3    | C | A | nonsynonymous SNV | G186T   | K62N   | M11 | T | B | -0.782 |
| 17 | 1747907   | 1747907   | RPA1         | replication protein A1, 70kDa                                               | NM_002945      | G | A | nonsynonymous SNV | G199A   | E67K   | M11 | T | P | 5.02   |
| 17 | 18671865  | 18671865  | FBXW10       | F-box and WD repeat domain containing 10                                    | NM_001267585.1 | G | A | nonsynonymous SNV | G1723A  | G575R  | M11 | D | D | 2.97   |
| 17 | 28545887  | 28545887  | SLC6A4       | solute carrier family 6 (neurotransmitter sodium symporter)                 | NM_001045      | C | T | nonsynonymous SNV | G406A   | E136K  | M11 | D | D | 5.71   |
| 17 | 33767745  | 33767745  | SLFN13       | schlafen family member 13                                                   | NM_144682      | G | A | nonsynonymous SNV | C2563T  | R855W  | M11 | D | D | 3.26   |
| 17 | 3665235   | 3665235   | ITGAE        | integrin, alpha E (antigen CD113)                                           | NM_002208      | C | T | nonsynonymous SNV | G289A   | V97I   | M11 | D | B | 1.5    |
| 17 | 39659206  | 39659206  | KRT13        | keratin 13, type I                                                          | NM_153490.2    | C | T | nonsynonymous SNV | G880A   | E294K  | M11 | T | B | 3.35   |
| 17 | 46607875  | 46607875  | HOXB1        | homeobox B1                                                                 | NM_002144      | C | T | nonsynonymous SNV | G392A   | G131E  | M11 | T | B | 0.693  |
| 17 | 54428267  | 54428267  | ANKFN1       | ankyrin-repeat and fibronectin type III domain containing 1                 | NM_153228      | C | T | nonsynonymous SNV | C338T   | S113F  | M11 | T | D | 5.84   |

|    |           |           |          |                                   |                |   |   |                   |         |         |     |   |   |       |
|----|-----------|-----------|----------|-----------------------------------|----------------|---|---|-------------------|---------|---------|-----|---|---|-------|
| 17 | 59482001  | 59482001  | TBX2     | T-box 2                           | NM_005994      | G | A | nonsynonymous SNV | G922A   | E308K   | M11 | T | P | 4.75  |
| 17 | 63198176  | 63198176  | RG59     | regulator of G-protein signaling  | NM_003835.3    | G | A | nonsynonymous SNV | G1042A  | E348K   | M11 | T | D | 5.81  |
| 17 | 65040837  | 65040837  | CACNG1   | calcium channel, voltage-dep      | NM_000727      | G | C | nonsynonymous SNV | G61C    | V21L    | M11 | T | B | 4.42  |
| 17 | 72367925  | 72367925  | GPR142   | G protein-coupled receptor 14     | NM_181790      | C | T | nonsynonymous SNV | C575T   | S192F   | M11 | D | D | 4.02  |
| 17 | 72954801  | 72954801  | HID1     | HID1 domain containing            | NM_030630      | G | A | nonsynonymous SNV | C1207T  | L403F   | M11 | D | D | 4.82  |
| 17 | 73236917  | 73236917  | GGA3     | golgi-associated, gamma ada       | NM_138619.3    | G | T | nonsynonymous SNV | C1168A  | L390M   | M11 | D | D | 4.56  |
| 17 | 7324322   | 7324322   | SPEM1    | spermatid maturation 1            | NM_199339      | C | T | nonsynonymous SNV | C328T   | H110Y   | M11 | D | B | 2.04  |
| 17 | 76488802  | 76488802  | DNAH17   | dynein, axonemal, heavy cha       | NM_173628      | G | A | nonsynonymous SNV | C6454T  | P2152S  | M11 | T |   | 3.68  |
| 17 | 78402442  | 78402442  | ENDOV    | endonuclease V                    | NM_173627.4    | C | T | nonsynonymous SNV | C761T   | P254L   | M11 | T | B | 0.781 |
| 17 | 9757818   | 9757818   | GLP2R    | glucagon-like peptide 2 recep     | NM_004246      | C | T | nonsynonymous SNV | C511T   | R171C   | M11 | T | B | 1.83  |
| 18 | 12009885  | 12009885  | IMPA2    | inositol(myo)-1(or 4)-monoph      | NM_014214      | C | A | nonsynonymous SNV | C234A   | R171C   | M11 | D | D | 5.48  |
| 18 | 42530690  | 42530690  | SETBP1   | SET binding protein 1             | NM_015559      | C | A | nonsynonymous SNV | C1385A  | P462H   | M11 | T | B | 5.2   |
| 18 | 42532021  | 42532021  | SETBP1   | SET binding protein 1             | NM_015559      | C | T | nonsynonymous SNV | C2716T  | P906S   | M11 | T | B | 4.34  |
| 18 | 44146307  | 44146307  | LOXHD1   | lipoxxygenase homology dom        | NM_144612      | G | A | nonsynonymous SNV | C2350T  | P784S   | M11 | T | P | 4.95  |
| 18 | 55222081  | 55222081  | FECH     | ferrochelataase                   | NM_001012515.2 | G | A | nonsynonymous SNV | C926T   | S309F   | M11 | D | D | 5.77  |
| 18 | 57103301  | 57103301  | CCBE1    | collagen and calcium binding      | NM_133459      | C | T | nonsynonymous SNV | G1060A  | E354K   | M11 | D | B | 5.8   |
| 18 | 61323113  | 61323113  | SERPINB3 | serpin peptidase inhibitor, cla   | NM_006919      | C | T | nonsynonymous SNV | G951A   | M317I   | M11 | T | B | 1.21  |
| 18 | 61325785  | 61325785  | SERPINB3 | serpin peptidase inhibitor, cla   | NM_006919      | C | T | nonsynonymous SNV | G431A   | R144Q   | M11 | D | B | 0.091 |
| 18 | 77726676  | 77726676  | HSBP1L1  | heat shock factor binding pro     | NM_001136180   | G | A | nonsynonymous SNV | G116A   | R39K    | M11 | T | B | 3.8   |
| 19 | 15572085  | 15572085  | RASAL3   | RAS protein activator like 3      | NM_022904      | C | T | nonsynonymous SNV | G488A   | G163E   | M11 | D | P | 1.5   |
| 19 | 15572086  | 15572086  | RASAL3   | RAS protein activator like 3      | NM_022904      | C | T | nonsynonymous SNV | G487A   | G163R   | M11 | D | P | 3.88  |
| 19 | 15806747  | 15806747  | CYP4F12  | cytochrome P450, family 4, s      | NM_023944      | G | A | nonsynonymous SNV | G1117A  | D373N   | M11 | D | P | 2.41  |
| 19 | 15905670  | 15905670  | OR10H5   | olfactory receptor, family 10,    | NM_001004466   | G | A | nonsynonymous SNV | G812A   | G271E   | M11 | T | P | 2.81  |
| 19 | 22156481  | 22156481  | ZNF208   | zinc finger protein 208           | NM_007153      | G | A | nonsynonymous SNV | C1355T  | P452L   | M11 | T | D | 0.432 |
| 19 | 22363024  | 22363024  | ZNF676   | zinc finger protein 676           | NM_001001411   | G | A | nonsynonymous SNV | C1495T  | H499Y   | M11 | D | D | 0.81  |
| 19 | 22941345  | 22941345  | ZNF99    | zinc finger protein 99            | NM_001080409   | C | T | nonsynonymous SNV | G1366A  | E456K   | M11 | T | B | -2.55 |
| 19 | 29699033  | 29699033  | UQCRCF1  | ubiquinol-cytochrome c reduc      | NM_006003      | T | C | nonsynonymous SNV | A247G   | I83V    | M11 | T | B | -4.98 |
| 19 | 35800953  | 35800953  | MAG      | myelin associated glycoprotei     | NM_002361.3    | C | T | nonsynonymous SNV | C1408T  | L470F   | M11 | T | B | 2.64  |
| 19 | 37643575  | 37643575  | ZNF585A  | zinc finger protein 585A          | NM_001288800.1 | G | A | nonsynonymous SNV | C1226T  | S409L   | M11 | D | B | 0.708 |
| 19 | 40903175  | 40903175  | PRX      | periaxin                          | NM_181882      | A | T | nonsynonymous SNV | T1084A  | F362I   | M11 | T | D | 4.56  |
| 19 | 42818481  | 42818481  | TMEM145  | transmembrane protein 145         | NM_173633      | C | T | nonsynonymous SNV | C178T   | R60C    | M11 | D | B | 3.43  |
| 19 | 44117527  | 44117527  | SRRM5    | serine/arginine repetitive mat    | NM_001145641   | T | A | nonsynonymous SNV | T1254A  | S418R   | M11 | T | P | -7.61 |
| 19 | 4552503   | 4552503   | SEMA6B   | sema domain, transmembran         | NM_032108      | G | A | nonsynonymous SNV | C920T   | A307V   | M11 | D | D | 4.24  |
| 19 | 4552599   | 4552599   | SEMA6B   | sema domain, transmembran         | NM_032108      | G | A | nonsynonymous SNV | C824T   | P275L   | M11 | D | B | 4.18  |
| 19 | 45976262  | 45976262  | FOSB     | FBJ murine osteosarcoma vir       | NM_006732.2    | G | A | nonsynonymous SNV | G1009A  | A337T   | M11 | T | D | 4.89  |
| 19 | 49671565  | 49671565  | TRPM4    | transient receptor potential ca   | NM_017636.3    | T | C | nonsynonymous SNV | T497C   | V166A   | M11 | D | D | 4.75  |
| 19 | 49693499  | 49693499  | TRPM4    | transient receptor potential ca   | NM_017636.3    | C | T | nonsynonymous SNV | C2054T  | A685V   | M11 | T | B | 2.71  |
| 19 | 50212088  | 50212088  | CPT1C    | carnitine palmitoyltransferase    | NM_001199752.2 | C | T | nonsynonymous SNV | C1558T  | P520S   | M11 | T | D | 4.42  |
| 19 | 51628322  | 51628322  | SIGLEC9  | sialic acid binding Ig-like lecti | NM_001198558.1 | G | A | nonsynonymous SNV | G91A    | V31M    | M11 | D | D | 2.88  |
| 19 | 52824895  | 52824895  | ZNF480   | zinc finger protein 480           | NM_144684.3    | C | T | nonsynonymous SNV | C392T   | S131F   | M11 | D | P | -3.71 |
| 19 | 54080055  | 54080055  | ZNF331   | zinc finger protein 331           | NM_018555.5    | C | T | nonsynonymous SNV | C241T   | R81C    | M11 | D | B | -0.85 |
| 19 | 55284824  | 55284824  | KIR2DL1  | killer cell immunoglobulin-like   | NM_014218      | G | C | nonsynonymous SNV | G110C   | R37P    | M11 | T | B | 1.24  |
| 19 | 55331197  | 55331197  | KIR3DL1  | killer cell immunoglobulin-like   | NM_013289      | C | T | nonsynonymous SNV | C385T   | H129Y   | M11 | D | P | 1.33  |
| 19 | 55450851  | 55450851  | NLRP7    | NLR family, pyrin domain con      | NM_001127255.1 | G | A | nonsynonymous SNV | C1336T  | R446C   | M11 | T | B | -1.84 |
| 19 | 5867208   | 5867208   | FUT5     | fucosyltransferase 5 (alpha (1    | NM_002034      | C | T | nonsynonymous SNV | G529A   | D177N   | M11 | D | D | 2.17  |
| 19 | 58806093  | 58806093  | ZNF8     | zinc finger protein 8             | NM_021089      | C | T | nonsynonymous SNV | C919T   | H307Y   | M11 | D | D | 4.82  |
| 19 | 8807909   | 8807909   | ACTL9    | actin-like 9                      | NM_178525      | C | T | stopgain          | G1143A  | W381X   | M11 | T |   | 4.51  |
| 19 | 9070708   | 9070708   | MUC16    | mucin 16, cell surface associ     | NM_024690      | G | A | nonsynonymous SNV | C16738T | L5580F  | M11 | D | B | -3.34 |
| 2  | 101648828 | 101648828 | TBC1D8   | TBC1 domain family, membe         | NM_001102426   | G | A | nonsynonymous SNV | C1793T  | S598F   | M11 | D | D | 5.02  |
| 2  | 120723203 | 120723203 | PTPN4    | protein tyrosine phosphatase      | NM_002830      | C | T | nonsynonymous SNV | C2540T  | P847L   | M11 | D | D | 5.62  |
| 2  | 128186322 | 128186322 | PROC     | protein C (inactivator of coag    | NM_000312      | G | A | nonsynonymous SNV | G1186A  | D396N   | M11 | D | D | 4.84  |
| 2  | 141816481 | 141816481 | LRP1B    | low density lipoprotein recept    | NM_018557      | C | T | nonsynonymous SNV | G1379A  | R460Q   | M11 | T | B | 4.57  |
| 2  | 160303331 | 160303331 | BAZ2B    | bromodomain adjacent to zin       | NM_013450.3    | G | A | stopgain          | C658T   | Q220X   | M11 | T |   | 5.7   |
| 2  | 167128979 | 167128979 | SCN9A    | sodium channel, voltage gate      | NM_002977      | C | T | nonsynonymous SNV | G3248A  | G1083E  | M11 | T | B | 4.49  |
| 2  | 177034144 | 177034144 | HOXD3    | homeobox D3                       | NM_006898      | G | A | nonsynonymous SNV | G302A   | G101E   | M11 |   | B | 4.59  |
| 2  | 179417157 | 179417157 | TTN      | titin                             | NM_001267550   | C | T | nonsynonymous SNV | G90470A | G30157E | M11 | D | D | 5.76  |
| 2  | 179614277 | 179614277 | TTN      | titin                             | NM_133379      | C | A | nonsynonymous SNV | G12850T | A4284S  | M11 | T | B | 3.23  |
| 2  | 179616439 | 179616439 | TTN      | titin                             | NM_133379      | G | A | nonsynonymous SNV | C10688T | S3563F  | M11 | T | P | 4.87  |
| 2  | 179644864 | 179644864 | TTN      | titin                             | NM_001267550   | G | A | stopgain          | C3592T  | Q1198X  | M11 | D |   | 4.9   |
| 2  | 203653609 | 203653609 | ICA1L    | islet cell autoantigen 1,69kDa    | NM_138468.5    | C | T | nonsynonymous SNV | G1187A  | R396Q   | M11 | T | B | -1.24 |
| 2  | 209025590 | 209025590 | CRYGA    | crystallin, gamma A               | NM_014617      | G | A | nonsynonymous SNV | C463T   | H155Y   | M11 | T | B | 3.73  |
| 2  | 21225126  | 21225126  | APOB     | apolipoprotein B                  | NM_000384      | C | T | nonsynonymous SNV | G13168A | D4390N  | M11 | D | P | 5.02  |
| 2  | 21230594  | 21230594  | APOB     | apolipoprotein B                  | NM_000384      | G | A | nonsynonymous SNV | C9146T  | R3638Q  | M11 | D | P | 4.92  |
| 2  | 219449406 | 219449406 | RQCD1    | RCD1 required for cell differe    | NM_001271634.1 | C | T | nonsynonymous SNV | C392T   | P131L   | M11 | D | D | 5.22  |
| 2  | 230377642 | 230377642 | DNER     | delta/notch-like EGF repeat c     | NM_139072      | G | A | nonsynonymous SNV | C1004T  | S335F   | M11 | T | B | 5.54  |
| 2  | 27278681  | 27278681  | AGBL5    | ATP/GTP binding protein-like      | NM_021831.5    | C | T | nonsynonymous SNV | C1040T  | S347F   | M11 | T | P | 5.36  |
| 2  | 48047595  | 48047595  | FBXO11   | F-box protein 11                  | NM_025133.4    | C | A | nonsynonymous SNV | G1451T  | G484V   | M11 | D | P | 5.35  |



|    |           |           |           |                                 |                |   |   |                   |         |        |     |   |   |  |        |
|----|-----------|-----------|-----------|---------------------------------|----------------|---|---|-------------------|---------|--------|-----|---|---|--|--------|
| 2  | 49190891  | 49190891  | FSHR      | follicle stimulating hormone r  | NM_000145.3    | C | T | nonsynonymous SNV | G1069A  | E357K  | M11 |   | D |  | 5.13   |
| 2  | 65299677  | 65299677  | CEP68     | centrosomal protein 68kDa       | NM_015147      | C | T | nonsynonymous SNV | G1447T  | L483F  | M11 | T | D |  | 4.9    |
| 2  | 96781254  | 96781254  | ADRA2B    | adrenoceptor alpha 2B           | NM_000682      | C | A | nonsynonymous SNV | G635T   | G212V  | M11 | D | B |  | 0.85   |
| 20 | 210261    | 210261    | DEFB129   | defensin, beta 129              | NM_080831      | C | T | nonsynonymous SNV | C401T   | T134I  | M11 | T | B |  | -7.35  |
| 20 | 36668956  | 36668956  | RPRD1B    | regulation of nuclear pre-mRN   | NM_021215      | C | T | nonsynonymous SNV | C271T   | H91Y   | M11 | T | D |  | 5.54   |
| 20 | 40033738  | 40033738  | CHD6      | chromodomain helicase DNA       | NM_032221      | G | A | nonsynonymous SNV | G7643T  | S2548F | M11 | D | B |  | 4.6    |
| 20 | 43615812  | 43615812  | STK4      | serine/threonine kinase 4       | NM_006282      | C | T | nonsynonymous SNV | C400T   | L134F  | M11 | D | D |  | 5.39   |
| 20 | 44678350  | 44678350  | SLC12A5   | solute carrier family 12 (potas | NM_001134771.1 | G | A | nonsynonymous SNV | G2171A  | G724E  | M11 | D | D |  | 4.43   |
| 20 | 8609000   | 8609000   | PLCB1     | phospholipase C, beta 1 (phc    | NM_015192.3    | G | A | nonsynonymous SNV | G306A   | M102I  | M11 | T | D |  | 6.17   |
| 21 | 10934114  | 10934114  | TPTE      | transmembrane phosphatase       | NM_199261.3    | C | T | nonsynonymous SNV | G863A   | R288K  | M11 | T | B |  | 1.17   |
| 21 | 27078356  | 27078356  | JAM2      | junctional adhesion molecule    | NM_021219.3    | G | A | nonsynonymous SNV | G763A   | G255S  | M11 | T | D |  | 5.02   |
| 21 | 27078357  | 27078357  | JAM2      | junctional adhesion molecule    | NM_021219.3    | G | A | nonsynonymous SNV | G764A   | G255D  | M11 | T | D |  | 5.02   |
| 21 | 43277341  | 43277341  | PRDM15    | PR domain containing 15         | NM_022115.4    | G | A | nonsynonymous SNV | C1327T  | P443S  | M11 | D | D |  | 5.58   |
| 21 | 45815369  | 45815369  | TRPM2     | transient receptor potential c  | NM_003307      | C | T | nonsynonymous SNV | C1867T  | R623C  | M11 | D | D |  | 4.32   |
| 21 | 46021150  | 46021150  | KRTAP10-7 | keratin associated protein 10   | NM_198689      | C | A | nonsynonymous SNV | C614A   | T205K  | M11 | T | B |  | 0.846  |
| 22 | 19511859  | 19511859  | CLDN5     | claudin 5                       | NM_001130861.1 | C | T | nonsynonymous SNV | G175A   | A59T   | M11 | D | B |  | 1.19   |
| 22 | 19707925  | 19707925  | SEPT5     | septin 5                        | NM_002688.5    | C | T | stopgain          | C445T   | Q149X  | M11 | T |   |  | 1.6    |
| 22 | 39714546  | 39714546  | RPL3      | ribosomal protein L3            | NM_000967.3    | G | A | nonsynonymous SNV | C55T    | R19W   | M11 | D | P |  | 4.17   |
| 3  | 107435678 | 107435678 | BBX       | bobby sox homolog (Drosoph      | NM_001142568.2 | C | A | stopgain          | C387A   | Y129X  | M11 | T |   |  | 0.585  |
| 3  | 114070014 | 114070014 | ZBTB20    | zinc finger and BTB domain c    | NM_001164342.2 | G | A | nonsynonymous SNV | C911T   | T304I  | M11 | D | B |  | 5.52   |
| 3  | 121126200 | 121126200 | STXBPL5   | syntaxin binding protein 5-lik  | NM_014980      | G | A | nonsynonymous SNV | G2770A  | E924K  | M11 | T | B |  | 4.69   |
| 3  | 130699468 | 130699468 | ATP2C1    | ATPase, Ca++ transporting, t    | NM_001199180.1 | C | T | nonsynonymous SNV | C1886T  | S629L  | M11 | D | D |  | 5.73   |
| 3  | 138763305 | 138763305 | PRR23C    | proline rich 23C                | NM_001134657   | G | A | nonsynonymous SNV | C158T   | A53V   | M11 | T | D |  | -0.863 |
| 3  | 160225913 | 160225913 | KPNA4     | karyopherin alpha 4 (importin   | NM_002268      | G | A | nonsynonymous SNV | C1354T  | L452F  | M11 | T | B |  | 5.22   |
| 3  | 16242269  | 16242269  | GALNT15   | polypeptide N-acetylgalactos    | NM_054110      | G | T | nonsynonymous SNV | G850T   | A284S  | M11 | T | B |  | 1.82   |
| 3  | 164777039 | 164777039 | SI        | sucrase-isomaltase (alpha-gli   | NM_001041      | T | A | nonsynonymous SNV | A1195T  | T399S  | M11 | D | D |  | 5.59   |
| 3  | 167183073 | 167183073 | SERPINI2  | serpin peptidase inhibitor, cla | NM_001012303.2 | C | T | nonsynonymous SNV | G817A   | E273K  | M11 | D | P |  | 5.74   |
| 3  | 189612028 | 189612028 | TP63      | tumor protein p63               | NM_003722.4    | C | T | stopgain          | C1780T  | R594X  | M11 |   |   |  | 5.02   |
| 3  | 48604446  | 48604446  | COL7A1    | collagen, type VII, alpha 1     | NM_000094      | C | T | nonsynonymous SNV | G8120A  | G2707E | M11 | D | D |  | 4.59   |
| 3  | 49940808  | 49940808  | MST1R     | macrophage stimulating 1 rec    | NM_002447.2    | G | T | nonsynonymous SNV | C235A   | H79N   | M11 | D | B |  | 2.12   |
| 3  | 50645386  | 50645386  | CISH      | cytokine inducible SH2-conta    | NM_013324.5    | G | T | nonsynonymous SNV | C480A   | N160K  | M11 | T | P |  | 2.86   |
| 3  | 52955840  | 52955840  | SFMBT1    | Scm-like with four mbt domai    | NM_016329      | G | A | nonsynonymous SNV | C1139T  | S380F  | M11 | T | B |  | 1.35   |
| 3  | 54798283  | 54798283  | CACNA2D3  | Calcium channel, voltage-dep    | NM_018398      | G | A | nonsynonymous SNV | G1285A  | E429K  | M11 | T | D |  | 5.95   |
| 3  | 64004626  | 64004626  | PSMD6     | Proteasome (prosome, macro      | NM_001271779   | T | A | nonsynonymous SNV | A744T   | K248N  | M11 | T | D |  | 2.4    |
| 3  | 75714941  | 75714941  | FRG2C     | FSHD region gene 2 family, n    | NM_001124759   | C | T | nonsynonymous SNV | C598T   | H200Y  | M11 | T | P |  | -1.35  |
| 3  | 93733599  | 93733599  | STX19     | Syntaxin 19                     | NM_001001850   | A | G | nonsynonymous SNV | T515C   | V172A  | M11 | D | D |  | 4.76   |
| 3  | 9726584   | 9726584   | MTMR14    | Myotubularin related protein    | NM_001077525   | C | G | nonsynonymous SNV | C1063G  | H355D  | M11 | D | D |  | 5.83   |
| 4  | 106613242 | 106613242 | INTS12    | Integrator complex subunit 12   | NM_001142471   | T | A | nonsynonymous SNV | A548T   | H183L  | M11 | T | D |  | 5.46   |
| 4  | 123663799 | 123663799 | BBS12     | Bardet-Biedl syndrome 12        | NM_001178007   | G | T | nonsynonymous SNV | G752T   | G251V  | M11 | D | B |  | 3.44   |
| 4  | 126240913 | 126240913 | FAT4      | FAT atypical cadherin 4         | NM_001291285   | G | A | nonsynonymous SNV | G3347A  | G1116E | M11 | D | D |  | 4.36   |
| 4  | 166418723 | 166418723 | CPE       | Carboxypeptidase E              | NM_001873      | G | A | nonsynonymous SNV | G1392A  | M464I  | M11 | D | P |  | 6.08   |
| 4  | 176622799 | 176622799 | GPM6A     | Glycoprotein M6A                | NM_005277      | G | T | nonsynonymous SNV | G157A   | G53R   | M11 | T | D |  | 6.01   |
| 4  | 183652188 | 183652188 | TENM3     | Teneurin transmembrane pro      | NM_001080477   | C | A | nonsynonymous SNV | G2863A  | D955N  | M11 | T | B |  | 5.12   |
| 4  | 25664462  | 25664462  | SLC34A2   | Solute carrier family 34 (type  | NM_006424      | C | T | nonsynonymous SNV | C248T   | S83L   | M11 | D | P |  | 5.24   |
| 4  | 47667154  | 47667154  | CORIN     | Corin, serine peptidase         | NM_006587      | G | A | nonsynonymous SNV | C1484T  | P495L  | M11 | T | D |  | 5.25   |
| 4  | 71347144  | 71347144  | MUC7      | Mucin 7, secreted               | NM_001145006   | C | T | nonsynonymous SNV | C683T   | S228F  | M11 |   | B |  | -1.32  |
| 4  | 71498383  | 71498383  | ENAM      | Enamelin                        | NM_031889      | C | T | stopgain          | C184T   | Q62X   | M11 | T |   |  | 6.07   |
| 4  | 73179476  | 73179476  | ADAMTS3   | ADAM metallopeptidase with      | NM_014243      | C | T | nonsynonymous SNV | G1663A  | G555R  | M11 | D | D |  | 6.02   |
| 4  | 88533290  | 88533290  | DSPP      | Dentin sialophosphoprotein      | NM_014208      | G | A | nonsynonymous SNV | G85A    | E29K   | M11 | D | P |  | 3.12   |
| 4  | 102515794 | 102515794 | PIIP5K2   | Diphosphoinositol pentakisph    | NM_001276277   | C | T | stopgain          | C2827T  | R943X  | M11 | T |   |  | 4.02   |
| 5  | 121739511 | 121739511 | SNCAIP    | Synuclein, alpha interacting p  | NM_001242935   | G | A | nonsynonymous SNV | G35A    | R12Q   | M11 | T | B |  | 3.85   |
| 5  | 133295535 | 133295535 | C5orf15   | Chromosome 5 open reading       | NM_020199      | G | A | nonsynonymous SNV | C316T   | P106S  | M11 | T | B |  | 3.15   |
| 5  | 13692194  | 13692194  | DNAH5     | Dynein, axonemal, heavy cha     | NM_001369      | G | A | stopgain          | C13774T | R4592X | M11 | T |   |  | 5.76   |
| 5  | 13811812  | 13811812  | DNAH5     | Dynein, axonemal, heavy cha     | NM_001369      | C | T | nonsynonymous SNV | G7351A  | E2451K | M11 | D | B |  | 5.78   |
| 5  | 156816384 | 156816384 | CYFIP2    | Cytoplasmic FMR1 interactin     | NM_001291721   | C | T | nonsynonymous SNV | C3317T  | A1106V | M11 | T | D |  | 4.93   |
| 5  | 161116139 | 161116139 | GABRA6    | Gamma-aminobutyric acid (G      | NM_000811      | G | A | nonsynonymous SNV | G410A   | R137K  | M11 | D | D |  | 5.59   |
| 5  | 170722951 | 170722951 | RANBP17   | RAN binding protein 17          | NM_022897      | C | T | nonsynonymous SNV | C3103T  | L1035F | M11 | T | B |  | 5.85   |
| 5  | 192030    | 192030    | LRRC14B   | Leucine rich repeat containi    | NM_001080478   | G | A | nonsynonymous SNV | G377A   | G126E  | M11 | T | B |  | 4.06   |
| 5  | 32048714  | 32048714  | PDZD2     | PDZ domain containing 2         | NM_178140      | T | C | nonsynonymous SNV | T1589C  | I530T  | M11 | T | B |  | -5.98  |
| 5  | 55081160  | 55081160  | DDX4      | DEAD (Asp-Glu-Ala-Asp) box      | NM_024415      | G | A | nonsynonymous SNV | G661A   | G221S  | M11 | T | B |  | 3.41   |
| 5  | 64483988  | 64483988  | ADAMTS6   | ADAM metallopeptidase with      | NM_197941      | C | T | nonsynonymous SNV | G2765A  | R922K  | M11 | D | D |  | 5.37   |
| 5  | 73136510  | 73136510  | ARHGGEF28 | Rho guanine nucleotide exch     | NM_001080479   | C | T | nonsynonymous SNV | C1352T  | S451L  | M11 | T | B |  | 2.06   |
| 5  | 94764359  | 94764359  | FAM81B    | Family with sequence similar    | NM_152548      | G | A | nonsynonymous SNV | G709A   | E237K  | M11 | T | D |  | 5.87   |
| 5  | 102503243 | 102503243 | GRIK2     | Glutamate receptor, ionotrop    | NM_021956      | C | T | stopgain          | C2350T  | Q784X  | M11 | T |   |  | 5.68   |
| 6  | 126080691 | 126080691 | HEY2      | Hes-related family bHLH tran    | NM_012259      | C | T | nonsynonymous SNV | C757T   | L253F  | M11 | T | P |  | 5.61   |
| 6  | 129637295 | 129637295 | LAMA2     | Laminin, alpha 2                | NM_000426      | G | A | nonsynonymous SNV | G4037A  | G1346E | M11 | T | D |  | 5.65   |
| 6  | 130762270 | 130762270 | TMEM200A  | Transmembrane protein 200A      | NM_052913      | G | A | nonsynonymous SNV | G703A   | E235K  | M11 | T | B |  | 5.69   |

|   |           |           |         |                                 |              |   |   |                   |        |        |     |   |   |        |
|---|-----------|-----------|---------|---------------------------------|--------------|---|---|-------------------|--------|--------|-----|---|---|--------|
| 6 | 131915473 | 131915473 | MED23   | Mediator complex subunit 23     | NM 004830    | G | A | nonsynonymous SNV | C2998T | R1000C | M11 | D | D | 6.03   |
| 6 | 133072417 | 133072417 | VNN2    | Vanin 2                         | NM 004665    | C | T | nonsynonymous SNV | G1067A | G356E  | M11 | T | P | 4.75   |
| 6 | 134210728 | 134210728 | TCF21   | Transcription factor 21         | NM 003206    | A | T | stopgain          | A193T  | K65X   | M11 | T |   | 4.31   |
| 6 | 135318774 | 135318774 | HBS1L   | HBS1-like translational GTPa    | NM 006620    | C | A | nonsynonymous SNV | G560T  | G187V  | M11 | D | D | 5.3    |
| 6 | 135763729 | 135763729 | AHI1    | Abelson helper integration sit  | NM 001134830 | G | A | nonsynonymous SNV | C1903T | P635S  | M11 | T | D | 5.66   |
| 6 | 150342289 | 150342289 | RAET1L  | Retinoic acid early transcript  | NM 130900    | T | C | nonsynonymous SNV | A383G  | E128G  | M11 | D | P | -3.81  |
| 6 | 153365149 | 153365149 | RGS17   | Regulator of G-protein signal   | NM 012419    | C | T | nonsynonymous SNV | G5A    | R2Q    | M11 | D | P | 5.15   |
| 6 | 160969590 | 160969590 | LPA     | Lipoprotein, Lp(a)              | NM 005577    | C | T | nonsynonymous SNV | G5075A | R1692Q | M11 | T | P | -5.41  |
| 6 | 25923931  | 25923931  | SLC17A2 | Solute carrier family 17, mem   | NM 001286123 | C | T | nonsynonymous SNV | G232A  | D78N   | M11 | T | B | -2.62  |
| 6 | 2675285   | 2675285   | MYLK4   | Myosin light chain kinase fam   | NM 001012418 | G | A | nonsynonymous SNV | C1115T | A372V  | M11 | T | B | 5.91   |
| 6 | 28227768  | 28227768  | NKAPL   | NFKB activating protein-like    | NM 001007531 | A | G | nonsynonymous SNV | A619G  | N207D  | M11 | T | B | -7.83  |
| 6 | 31619473  | 31619473  | BAG6    | BCL2-associated athanogene      | NM 004639    | G | A | nonsynonymous SNV | C68T   | T23I   | M11 | D | D | 4.76   |
| 6 | 32171591  | 32171591  | NOTCH4  | Notch 4                         | NM 004557    | C | T | nonsynonymous SNV | G3187A | A1063T | M11 | T | B | 2.29   |
| 6 | 33256783  | 33256783  | WDR46   | WD Repeat Domain 46             | NM 005452    | C | A | nonsynonymous SNV | G77T   | R26L   | M11 | T | B | 4.25   |
| 6 | 41162548  | 41162548  | TREML2  | Triggering Receptor Express     | NM 024807    | G | A | nonsynonymous SNV | C400T  | P134S  | M11 | T | D | 3.06   |
| 6 | 42981065  | 42981065  | MEA1    | Male-Enhanced Antigen 1         | NM 014623    | G | C | nonsynonymous SNV | C91G   | P31A   | M11 | D | B | 5.06   |
| 6 | 46847599  | 46847599  | GPR116  | adhesion G protein-coupled r    | NM 001098518 | G | A | nonsynonymous SNV | C092T  | S331L  | M11 | T | B | 4.99   |
| 6 | 52871184  | 52871184  | ICK     | Intestinal cell (MAK-like) kina | NM 016513    | G | A | nonsynonymous SNV | C1673T | S558F  | M11 | D | D | 5.63   |
| 6 | 55925721  | 55925721  | COL21A1 | Collagen, Type XXI, Alpha 1     | NM 030820    | G | A | nonsynonymous SNV | C2320T | P774S  | M11 | T | B | 2.06   |
| 6 | 74229644  | 74229644  | EEF1A1  | Eukaryotic Translation Elong    | NM 001402    | T | G | nonsynonymous SNV | A106C  | K36Q   | M11 | D | P | 4.15   |
| 6 | 75797349  | 75797349  | COL12A1 | Collagen, type XII, alpha 1     | NM 004370    | C | T | nonsynonymous SNV | G9125A | G3042E | M11 | D | D | 5.75   |
| 7 | 123594010 | 123594010 | SPAM1   | sperm adhesion molecule 1 (     | NM 003117    | A | C | nonsynonymous SNV | A386C  | K129T  | M11 | D | B | -2.14  |
| 7 | 137792253 | 137792253 | AKR1D1  | Aldo-keto reductase family 1,   | NM 005989    | G | A | nonsynonymous SNV | G782A  | R261H  | M11 | D | D | 5.55   |
| 7 | 143453704 | 143453704 | CTAGE6  | CTAGE Family, Member 6          | NM 178561    | C | T | nonsynonymous SNV | G1048A | E350K  | M11 |   |   |        |
| 7 | 143657860 | 143657860 | OR2F1   | Olfactory Receptor, Family 2,   | NM 012369    | C | T | nonsynonymous SNV | C797T  | P266L  | M11 | T | B | 4.41   |
| 7 | 143771325 | 143771325 | OR2A25  | Olfactory Receptor, Family 2,   | NM 001004488 | C | T | stopgain          | C13T   | Q5X    | M11 | T |   | 0.713  |
| 7 | 150094663 | 150094663 | ZNF775  | Zinc Finger Protein 775         | NM 173680    | C | T | nonsynonymous SNV | C1094T | A365V  | M11 |   | B | 3.14   |
| 7 | 151962134 | 151962134 | KMT2C   | Lysine (K)-Specific Methyltr    | NM 170606    | G | T | stopgain          | C1173A | C391X  | M11 | T | D |        |
| 7 | 151962168 | 151962168 | KMT2C   | Lysine (K)-Specific Methyltr    | NM 170606    | C | A | nonsynonymous SNV | G1139T | R380L  | M11 | T | D | 4.65   |
| 7 | 21521570  | 21521570  | SP4     | Sp4 transcription factor        | NM 003112    | C | T | stopgain          | C1936T | Q646X  | M11 | T |   | 5.47   |
| 7 | 40041528  | 40041528  | CDK13   | Cyclin-dependent kinase 13      | NM 003718    | C | T | stopgain          | C2251T | R751X  | M11 |   |   | 1.31   |
| 7 | 63680022  | 63680022  | ZNF735  | Zinc finger protein 735         | NM 001159524 | C | T | nonsynonymous SNV | C593T  | S198L  | M11 |   |   |        |
| 7 | 82580270  | 82580270  | PCLO    | Piccolo presynaptic cytomatri   | NM 033026    | G | T | nonsynonymous SNV | C9634A | Q3212K | M11 | D | P | 5.33   |
| 7 | 84710865  | 84710865  | SEMA3D  | Sema domain, immunoglobul       | NM 152754    | C | T | nonsynonymous SNV | G343A  | E115K  | M11 | D | P | 5.47   |
| 7 | 98792945  | 98792945  | KPNA7   | Karyopherin alpha 7 (import     | NM 001145715 | C | T | nonsynonymous SNV | G301A  | E101K  | M11 | D | B | 4.69   |
| 8 | 106814156 | 106814156 | ZFPM2   | Zinc finger protein, FOG fami   | NM 012082    | C | T | nonsynonymous SNV | C1846T | P616S  | M11 | T | B | 3.9    |
| 8 | 108276562 | 108276562 | ANGPT1  | Angiotensinogen 1               | NM 001146    | T | G | nonsynonymous SNV | A1223C | H408P  | M11 | D | D | 5.97   |
| 8 | 110464379 | 110464379 | PKHD1L1 | Polycystic kidney and hepatic   | NM 177531    | C | T | nonsynonymous SNV | C6377T | T2126I | M11 | T | P | 1.97   |
| 8 | 139890514 | 139890514 | COL22A1 | Collagen, type XXII, alpha 1    | NM 152888    | G | A | nonsynonymous SNV | C137T  | S46F   | M11 |   | D | 5.19   |
| 8 | 145737644 | 145737644 | RECQL4  | RecQ protein-like 4             | NM 004260    | G | A | nonsynonymous SNV | C3119T | P1040L | M11 |   |   |        |
| 8 | 17869206  | 17869206  | PCM1    | Pericentriolar material 1       | NM 006197    | C | T | nonsynonymous SNV | C5381T | T1794I | M11 | D | D | 3.87   |
| 8 | 27293809  | 27293809  | PTK2B   | Protein tyrosine kinase 2 bet   | NM 173174    | C | T | nonsynonymous SNV | C1285T | R429C  | M11 | D | D | 3.67   |
| 8 | 57228854  | 57228854  | SDR16C5 | Short chain dehydrogenase/r     | NM 138969    | G | A | nonsynonymous SNV | C53T   | S18L   | M11 | T | B | -0.292 |
| 8 | 61778412  | 61778412  | CHD7    | Chromodomain helicase DNA       | NM 017780    | G | T | stopgain          | G8914T | E2972X | M11 | D |   | 4.47   |
| 8 | 87683280  | 87683280  | CNGB3   | Cyclic nucleotide gated chan    | NM 019098    | C | T | nonsynonymous SNV | G385A  | D129N  | M11 | T | B | 4.79   |
| 8 | 88885976  | 88885976  | DCAF4L2 | DDB1 and CUL4 associated I      | NM 152418    | T | G | nonsynonymous SNV | A224C  | N75T   | M11 | D | B | 1.92   |
| 9 | 113308559 | 113308559 | SVEP1   | Sushi, von Willebrand factor    | NM 153366    | C | T | nonsynonymous SNV | G800A  | G267E  | M11 | D | D | 5.74   |
| 9 | 113445053 | 113445053 | MUSK    | muscle, skeletal, receptor tyr  | NM 005592    | C | T | nonsynonymous SNV | C179T  | S60F   | M11 | T | P | 5.57   |
| 9 | 126144643 | 126144643 | DENND1A | DENN/MADD Domain Contain        | NM 020946    | G | A | nonsynonymous SNV | C2098T | P700S  | M11 | T | D | 4.15   |
| 9 | 127951939 | 127951939 | PPP6C   | Protein phosphatase 6, catal    | NM 001123355 | G | A | nonsynonymous SNV | C59T   | P20L   | M11 | D | P | 4.81   |
| 9 | 129642756 | 129642756 | ZBTB34  | Zinc Finger And BTB Domain      | NM 001099270 | C | T | nonsynonymous SNV | C1066T | P356S  | M11 | T | B | 5.88   |
| 9 | 13190207  | 13190207  | MPDZ    | Multiple PDZ domain protei      | NM 003829    | A | G | nonsynonymous SNV | T2060C | V687A  | M11 | T | N | 2.08   |
| 9 | 139369268 | 139369268 | SEC16A  | SEC16 Homolog A                 | NM 014866    | G | T | nonsynonymous SNV | C2800A | P934T  | M11 | T | D | 3.61   |
| 9 | 2161869   | 2161869   | SMARCA2 | SWI/SNF related, matrix ass     | NM 003070    | G | T | nonsynonymous SNV | G4165T | A1389S | M11 | T | B | 5.1    |
| 9 | 33948481  | 33948481  | UBAP2   | Ubiquitin associated protein 2  | NM 001282529 | C | A | nonsynonymous SNV | G360T  | Q120H  | M11 | T | D | 2.1    |
| 9 | 35102161  | 35102161  | STOML2  | Stomatin (EPB72)-like 2         | NM 001287032 | G | A | nonsynonymous SNV | C61T   | R21W   | M11 | D | D | 5.56   |
| 9 | 35547189  | 35547189  | RUSC2   | RUN and SH3 domain contain      | NM 001135999 | C | T | nonsynonymous SNV | C671T  | S224F  | M11 | D | P | 5.09   |
| 9 | 40772993  | 40772993  | ZNF658  | Zinc finger protein 658         | NM 033160    | C | A | nonsynonymous SNV | G2282T | R761L  | M11 | T | B | -0.563 |
| 9 | 90585502  | 90585502  | CDK20   | Cyclin-dependent kinase 20      | NM 001039803 | C | T | nonsynonymous SNV | G544A  | D182N  | M11 | D | B | 4.73   |
| 9 | 93650819  | 93650819  | SYK     | Spleen tyrosine kinase          | NM 003177    | C | T | nonsynonymous SNV | C1745T | T582I  | M11 | T | B | 5.22   |
| 9 | 96070639  | 96070639  | WNK2    | WNK lysine deficient protein    | NM 001282394 | C | T | nonsynonymous SNV | C6400T | P2134S | M11 | T | P | 5.45   |
| X | 102755366 | 102755366 | RAB40A  | RAB40A, member RAS onco         | NM 080879    | G | A | stopgain          | C319T  | R107X  | M11 | T |   | 0.225  |
| X | 105189925 | 105189925 | NRK     | Nik related kinase              | NM 198465    | G | A | nonsynonymous SNV | G4121A | R1374Q | M11 | D | B | 3.47   |
| X | 11174649  | 11174649  | ARHGAP6 | Rho GTPase activating prote     | NM 013427    | G | A | nonsynonymous SNV | C1907T | S636L  | M11 |   | B | 4.65   |
| X | 117712597 | 117712597 | DOCK11  | Dedicator of cytokinesis 11     | NM 144658    | C | T | nonsynonymous SNV | C1499T | S500F  | M11 | T | D | 5.77   |
| X | 119249586 | 119249586 | RHOXF1  | Rhox homeobox family, mem       | NM 139282    | C | T | nonsynonymous SNV | G187A  | D63N   | M11 | T | D | -2.24  |
| X | 12632951  | 12632951  | FRMPD4  | FERM and PDZ domain conti       | NM 014728    | G | A | nonsynonymous SNV | G373A  | D125N  | M11 | T | D | 5.55   |

|    |           |           |           |                                 |                |   |    |                   |              |                  |     |   |   |        |
|----|-----------|-----------|-----------|---------------------------------|----------------|---|----|-------------------|--------------|------------------|-----|---|---|--------|
| X  | 129270094 | 129270094 | AIFM1     | Apoptosis-inducing factor, mil  | NM_004208      | C | T  | nonsynonymous SNV | G1231A       | G411S            | M11 | D | P | 6      |
| X  | 134186056 | 134186056 | FAM127B   | Family with sequence similar    | NM_01078172    | G | A  | nonsynonymous SNV | C83T         | P28L             | M11 | D | D | 2.38   |
| X  | 135323348 | 135323348 | MAP7D3    | MAP7 domain containing 3        | NM_024597      | G | A  | nonsynonymous SNV | C506T        | S169F            | M11 | D | D | 1.13   |
| X  | 135761728 | 135761728 | ARHGFE6   | Rac/Cdc42 guanine nucleotid     | NM_004840      | G | A  | nonsynonymous SNV | C1796T       | P599L            | M11 | D | D | 4.7    |
| X  | 138864823 | 138864823 | ATP11C    | ATPase, class VI, type 11C      | NM_173694      | T | G  | nonsynonymous SNV | A1844C       | N615T            | M11 | T | B | 5.68   |
| X  | 149013215 | 149013215 | MAGEA8    | Melanoma antigen family A8      | NM_001166400   | G | T  | nonsynonymous SNV | G169T        | G57W             | M11 | D | D | -0.342 |
| X  | 149013233 | 149013233 | MAGEA8    | Melanoma antigen family A8      | NM_001166400   | C | T  | stopgain          | C187T        | Q63X             | M11 | T | D | 1.03   |
| X  | 151304001 | 151304001 | MAGEA10   | Melanoma antigen family A10     | NM_001011543   | G | A  | nonsynonymous SNV | C92T         | P31L             | M11 | T | B | -0.808 |
| X  | 153763423 | 153763423 | G6PD      | Glucose-6-phosphate dehydr      | NM_000402      | C | G  | nonsynonymous SNV | G535C        | A179P            | M11 | T | B | 4.76   |
| X  | 154507236 | 154507236 | CLIC2     | Chloride intracellular channel  | NM_001289      | C | T  | nonsynonymous SNV | G700A        | E234K            | M11 | D | D | 4.86   |
| X  | 30712565  | 30712565  | GK        | Glycerol kinase                 | NM_001205019   | C | T  | nonsynonymous SNV | C463T        | R155C            | M11 | D | D | 5.46   |
| X  | 40542175  | 40542175  | MED14     | Mediator complex subunit 14     | NM_004229      | G | A  | stopgain          | C2131T       | R711X            | M11 | T | D | 5.7    |
| X  | 51639881  | 51639881  | MAGED1    | Melanoma antigen family D1      | NM_001005333   | C | T  | nonsynonymous SNV | C1298T       | P433L            | M11 | T | B | 2.95   |
| X  | 70387352  | 70387352  | NLGN3     | Neuroliquin 3                   | NM_018977      | A | C  | nonsynonymous SNV | A1345C       | T449P            | M11 | D | D | 4.9    |
| X  | 72433623  | 72433623  | NAP1L2    | Nucleosome assembly protei      | NM_021963      | C | T  | nonsynonymous SNV | G706A        | D236N            | M11 | T | D | 0.824  |
| X  | 75003383  | 75003383  | MAGEE2    | Melanoma antigen family E2      | NM_138703      | C | A  | nonsynonymous SNV | G1504T       | A502S            | M11 | T | D | 1.81   |
| X  | 79937511  | 79937511  | BRWD3     | Bromodomain and WD repea        | NM_153252      | G | A  | nonsynonymous SNV | C4480T       | P1494S           | M11 |   | B | 4.09   |
| 7  | 140453136 | 140453136 | BRAF      | v-rf murine sarcoma viral or    | NM_004333      | A | T  | nonsynonymous SNV | T1799A       | V600E            | M11 | D | D | 5.65   |
| 19 | 49558211  | 49558211  | CGB7      | Chorionic Gonadotropin, Beta    | NM_033142      | T | G  | nonsynonymous SNV | A70C         | M24L             | M11 |   |   | 946    |
| 7  | 100645960 | 100645960 | MUC12     | Mucin12                         | NM_001164462   | A | T  | nonsynonymous SNV | A12116T      | D4039V           | M11 | T |   | -1.72  |
| 1  | 248801602 | 248801602 | OR2T35    | Olfactory Receptor Family 2,    | NM_001001827   | 0 | CA | stopgain          | 957_958insTG | I320_R321delinsX | M11 |   |   |        |
| 11 | 77614590  | 77614590  | INTS4     | Integrator Complex Subunit 4    | NM_033547      | T | G  | nonsynonymous SNV | A2093C       | K698T            | M11 | T | B | 4.41   |
| 7  | 100639761 | 100639761 | MUC12     | Mucin12                         | NM_001164462   | G | C  | nonsynonymous SNV | G5917C       | D1973H           | M11 | T |   | -275   |
| 19 | 49558216  | 49558216  | CGB7      | Chorionic Gonadotropin, Beta    | NM_033142      | C | T  | nonsynonymous SNV | G65A         | R22K             | M11 | T |   | -353   |
| 5  | 43277335  | 43277335  | NIM1K     | NM1 Serine/leucine Kinase       | NM_153361      | G | C  | nonsynonymous SNV | G469C        | E157Q            | M11 | D | D | 5.91   |
| 1  | 152129130 | 152129130 | RPTN      | repetin                         | NM_001122965   | G | T  | nonsynonymous SNV | C445A        | P149T            | M11 | T | B | -10.4  |
| 1  | 214171121 | 214171121 | PROX1     | prospero homeobox 1             | NM_001270616.1 | G | A  | nonsynonymous SNV | G1243A       | V415I            | M14 | T | D | 5.43   |
| 10 | 100453657 | 100453657 | HPSE2     | heparanase 2 (inactive)         | NM_021828.4    | T | C  | nonsynonymous SNV | A1004G       | H335R            | M14 | P |   | 5.84   |
| 10 | 46254776  | 46254776  | FAM21C    | family with sequence similar    | NM_015262.2    | A | C  | nonsynonymous SNV | A1562C       | Y521S            | M14 | T | B | 3.26   |
| 10 | 49994817  | 49994817  | WDFY4     | WDFY family member 4            | NM_020945      | C | A  | nonsynonymous SNV | C3710A       | T1237K           | M14 |   | B | 5.31   |
| 12 | 123065158 | 123065158 | KNTC1     | kinetochore associated 1        | NM_014708      | C | T  | stopgain          | C2923T       | Q975X            | M14 | T |   | 4.97   |
| 12 | 25378562  | 25378562  | KRAS      | Kirsten rat sarcoma viral onc   | NM_004985.4    | C | T  | nonsynonymous SNV | G436A        | A146T            | M14 | D | D | 5.52   |
| 12 | 53668689  | 53668689  | ESPL1     | extra spindle pole bodies like  | NM_012291      | C | G  | nonsynonymous SNV | C1595G       | A532G            | M14 | T | B | 2.91   |
| 13 | 101717769 | 101717769 | NALCN     | sodium leak channel, non sel    | NM_052867      | G | A  | nonsynonymous SNV | C4591T       | H1531Y           | M14 | D | D | 5.71   |
| 14 | 102461124 | 102461124 | DYNC1H1   | dynein, cytoplasmic 1, heavy    | NM_001376      | G | A  | nonsynonymous SNV | G3271A       | G1091R           | M14 | T | B | 5.73   |
| 15 | 48431333  | 48431333  | SLC24A5   | solute carrier family 24 (sodi  | NM_205850      | G | A  | nonsynonymous SNV | G1039A       | A347T            | M14 | T | P | 4.02   |
| 16 | 2126130   | 2126130   | TSC2      | tuberous sclerosis 2            | NM_000548.3    | C | T  | nonsynonymous SNV | C2701T       | R901C            | M14 | D | D | 5.09   |
| 16 | 2546619   | 2546619   | TBC1D24   | TBC1 domain family, membe       | NM_001199107.1 | G | A  | nonsynonymous SNV | G470A        | R157H            | M14 | T | B | 4.11   |
| 16 | 28507445  | 28507445  | APOBR     | apolipoprotein B receptor       | NM_018690      | G | C  | nonsynonymous SNV | G1083C       | E361D            | M14 | T | B | -2     |
| 16 | 28507452  | 28507452  | APOBR     | apolipoprotein B receptor       | NM_018690      | G | T  | nonsynonymous SNV | G1090T       | G364W            | M14 | D | B | -2.49  |
| 16 | 53191380  | 53191380  | CHD9      | chromodomain helicase DNA       | NM_025134      | C | A  | nonsynonymous SNV | C1379A       | A460D            | M14 | T | B | 1.39   |
| 16 | 70563087  | 70563087  | SF3B3     | splicing factor 3b, subunit 3,  | NM_012426      | C | G  | nonsynonymous SNV | C382G        | R128G            | M14 | D | D | 3.65   |
| 17 | 4996073   | 4996073   | ZFP3      | ZFP3 zinc finger protein        | NM_153018      | A | C  | nonsynonymous SNV | A1274C       | E425A            | M14 | D | B | 2.79   |
| 18 | 21110511  | 21110511  | C18orf8   | chromosome 18 open reading      | NM_013326.4    | A | G  | nonsynonymous SNV | A1829G       | Y610C            | M14 | D | D | 5.8    |
| 18 | 60646603  | 60646603  | PHLPP1    | PH domain and leucine rich      | NM_194449      | C | T  | nonsynonymous SNV | C5093T       | P1698L           | M14 | D | B | -0.764 |
| 19 | 1004963   | 1004963   | GRIN3B    | glutamate receptor, ionotrop    | NM_138690      | C | G  | nonsynonymous SNV | C1463G       | A488G            | M14 | D | D | 4.43   |
| 19 | 1879987   | 1879987   | ABHD17A   | abhydrolase domain containi     | NM_031213.3    | A | C  | nonsynonymous SNV | T613G        | S205A            | M14 | D | D | 2.21   |
| 19 | 34824610  | 34824610  | KIAA0355  | KIAA0355                        | NM_014686      | T | G  | nonsynonymous SNV | T1265G       | V422G            | M14 | D | D | 5.63   |
| 19 | 58868676  | 58868676  | ZNF497    | zinc finger protein 497         | NM_198458.2    | C | T  | nonsynonymous SNV | G326A        | G109E            | M14 | T | B | 0.032  |
| 2  | 113742550 | 113742550 | IL36G     | interleukin 36, gamma           | NM_019618.3    | G | C  | nonsynonymous SNV | G434C        | R145T            | M14 | T | B | -8.78  |
| 2  | 14775367  | 14775367  | LOC653602 | LOC653602                       | NM_001291410   | C | A  | nonsynonymous SNV | C41A         | S14Y             | M14 |   |   |        |
| 2  | 212576817 | 212576817 | ERBB4     | erb-b2 receptor tyrosine kin    | NM_005235.2    | T | A  | nonsynonymous SNV | A1082T       | K361M            | M14 | D | D | 5.05   |
| 2  | 214174893 | 214174893 | SPAG16    | sperm associated antigen 16     | NM_024532.4    | G | T  | nonsynonymous SNV | G390T        | Q130H            | M14 | D | D | 1.02   |
| 2  | 74702163  | 74702163  | CCDC142   | coiled-coil domain containi     | NM_032779      | G | A  | nonsynonymous SNV | C1855T       | P619S            | M14 | T | B | 1.75   |
| 2  | 84934797  | 84934797  | DNAH6     | dynein, axonemal, heavy cha     | NM_001370      | G | A  | nonsynonymous SNV | G9005A       | C3002Y           | M14 | T | P | 5.58   |
| 22 | 50315971  | 50315971  | CRELD2    | cysteine-rich with EGF-like     | NM_001135101   | C | G  | nonsynonymous SNV | C619G        | P207A            | M14 | T | B | -2.64  |
| 3  | 139094367 | 139094367 | COPB2     | coatomer protein complex, su    | NM_004766      | G | T  | nonsynonymous SNV | C594A        | D198E            | M14 | T | B | 4.48   |
| 3  | 151474822 | 151474822 | AADACL2   | arylacetamide deacetylase-li    | NM_207365      | G | A  | nonsynonymous SNV | G646A        | V216I            | M14 | T | B | 4.05   |
| 3  | 3189176   | 3189176   | TRNT1     | tRNA nucleotidyl transferase,   | NM_182916      | G | C  | nonsynonymous SNV | G845C        | S282T            | M14 | T | B | 3.83   |
| 3  | 48664065  | 48664065  | SLC26A6   | solute carrier family 26 (anior | NM_022911.2    | G | C  | nonsynonymous SNV | C2127G       | H709Q            | M14 | T | B | -0.162 |
| 3  | 49770300  | 49770300  | IP6K1     | inositol hexakisphosphate kin   | NM_153273.3    | G | C  | nonsynonymous SNV | C540G        | H180Q            | M14 | T | B | 0.6    |
| 4  | 46067589  | 46067589  | GABRG1    | Gamma-aminobutyric acid (G      | NM_173536      | G | G  | nonsynonymous SNV | G334C        | D112H            | M14 | D | D | 5.08   |
| 5  | 179996160 | 179996160 | CNOT6     | CCR4-NOT transcription com      | NM_015455      | G | T  | nonsynonymous SNV | G1078T       | A360S            | M14 |   | D | 5.86   |
| 6  | 128302261 | 128302261 | PTPRK     | Protein tyrosine phosphatase    | NM_001291981   | G | T  | nonsynonymous SNV | C3777A       | D1259E           | M14 | D | D | -8.16  |
| 6  | 31239378  | 31239378  | HLA-C     | Major histocompatibility comp   | NM_002117      | T | G  | nonsynonymous SNV | A341C        | D114A            | M14 | T | B | -1.89  |
| 7  | 140453155 | 140453155 | BRAF      | B-Raf Proto-Oncogene, Serin     | NM_004333      | C | T  | nonsynonymous SNV | G1780A       | D594N            | M14 | D | D | 5.65   |
| 8  | 52387647  | 52387647  | PXDNL     | Peroxidase-like                 | NM_144651      | C | G  | nonsynonymous SNV | G579C        | E193D            | M14 | T | B | -5.07  |

|   |           |           |          |                                 |                |   |   |                   |         |        |     |   |   |        |
|---|-----------|-----------|----------|---------------------------------|----------------|---|---|-------------------|---------|--------|-----|---|---|--------|
| 9 | 119065180 | 119065180 | PAPPA    | Pregnancy-Associated Plasma     | NM_002581      | A | G | nonsynonymous SNV | A3098G  | D1033G | M14 | D | P | 5.82   |
| 9 | 39099985  | 39099985  | CNTNAP3  | Contactin Associated Protein    | NM_033655      | C | T | nonsynonymous SNV | G2918A  | G973E  | M14 | D | D | 3.68   |
| X | 115577943 | 115577943 | SLC6A14  | Solute carrier family 6 (amino  | NM_007231      | C | A | nonsynonymous SNV | C826A   | L276I  | M14 | D | P | -0.28  |
| X | 129518458 | 129518458 | GPR119   | G protein-coupled receptor 11   | NM_178471      | A | T | nonsynonymous SNV | T964A   | S322T  | M14 | T | B | 2.8    |
| X | 36122731  | 36122731  | CHDC2    | Cilia and flagella associated p | NM_173695      | C | T | nonsynonymous SNV | C968T   | S323F  | M14 | T | B | 2.64   |
| X | 41495910  | 41495910  | CASK     | Calcium/calmodulin-depende      | NM_003688      | C | T | nonsynonymous SNV | G836A   | R279Q  | M14 | D | P | 5.78   |
| X | 47426060  | 47426060  | ARAF     | A-Raf proto-oncogene, serine    | NM_001654      | C | G | nonsynonymous SNV | G580G   | P194A  | M14 | T | B | 4.46   |
| X | 47426061  | 47426061  | ARAF     | A-Raf proto-oncogene, serine    | NM_001654      | C | A | nonsynonymous SNV | C581A   | P194Q  | M14 | T | B | 1.02   |
| 1 | 10493999  | 10493999  | APITD1   | APITD1-CORT readthrough         | NM_198544.3    | C | T | nonsynonymous SNV | C152T   | S51L   | M16 | T | D | 4.28   |
| 1 | 109839740 | 109839740 | MYBPHL   | myosin binding protein H-like   | NM_001010985.2 | G | A | nonsynonymous SNV | C502T   | P168S  | M16 | T | P | 2.85   |
| 1 | 1133192   | 1133192   | TLL10    | tubulin tyrosine ligase-like fa | NM_001130045   | G | A | nonsynonymous SNV | G1987A  | E663K  | M16 | T | B | 1.42   |
| 1 | 117944839 | 117944839 | MAN1A2   | mannosidase, alpha, class 1/    | NM_006699      | C | T | stopgain          | C334T   | R112X  | M16 | T |   | 4.73   |
| 1 | 119934859 | 119934859 | HAO2     | hydroxyacid oxidase 2           | NM_016527.3    | G | A | nonsynonymous SNV | G898A   | G300R  | M16 |   | D | 5.17   |
| 1 | 1275465   | 1275465   | DVL1     | dishevelled segment polarity    | NM_004421      | C | G | nonsynonymous SNV | G862C   | A288P  | M16 | D | D | 3.43   |
| 1 | 12939817  | 12939817  | PRAMEF4  | PRAME family member 4           | NM_001009611   | C | T | nonsynonymous SNV | G985A   | D329N  | M16 | T | B | -2.05  |
| 1 | 12943170  | 12943170  | PRAMEF4  | PRAME family member 4           | NM_001009611   | C | T | nonsynonymous SNV | G46A    | G16R   | M16 | T | B | -0.706 |
| 1 | 152058267 | 152058267 | TCHHL1   | trichohyalin-like 1             | NM_001008536   | C | A | stopgain          | G1891T  | G631X  | M16 | T |   | -1.64  |
| 1 | 152059763 | 152059763 | TCHHL1   | trichohyalin-like 1             | NM_001008536   | C | T | nonsynonymous SNV | G395A   | R132K  | M16 | T | B | 1.42   |
| 1 | 152284394 | 152284394 | FLG      | filaggrin                       | NM_002016      | C | T | nonsynonymous SNV | G2968A  | E990K  | M16 | T | B | 1.42   |
| 1 | 152324797 | 152324797 | FLG2     | filaggrin family member 2       | NM_001014342   | C | T | nonsynonymous SNV | G5465A  | R1822Q | M16 | T | B | 0.594  |
| 1 | 152484015 | 152484015 | LCE5A    | late cornified envelope 5A      | NM_178438      | C | T | nonsynonymous SNV | C5T     | S2F    | M16 | D | D | 5.28   |
| 1 | 152484159 | 152484159 | LCE5A    | late cornified envelope 5A      | NM_178438      | C | T | nonsynonymous SNV | C149T   | S50F   | M16 | D | P | 2.23   |
| 1 | 153029109 | 153029109 | SPRR2A   | small proline-rich protein 2A   | NM_005988      | G | A | nonsynonymous SNV | C103T   | P35S   | M16 | D | D | 2.79   |
| 1 | 153314103 | 153314103 | PLYRPA   | peptidoglycan recognition pro   | NM_020393      | C | T | nonsynonymous SNV | G625A   | A209T  | M16 |   | P | 4.2    |
| 1 | 153789954 | 153789954 | GATAD2B  | GATA zinc finger domain con     | NM_020699      | A | G | nonsynonymous SNV | T794C   | V265A  | M16 | T | B | 6.17   |
| 1 | 156883829 | 156883829 | PEAR1    | platelet endothelial aggregati  | NM_001080471   | C | G | nonsynonymous SNV | C2899G  | R967G  | M16 | T | B | 1.39   |
| 1 | 157548560 | 157548560 | FCRL4    | Fc receptor-like 4              | NM_031282      | C | T | nonsynonymous SNV | G1360A  | V454I  | M16 |   | B | 3.92   |
| 1 | 157653007 | 157653007 | FCRL3    | Fc receptor-like 3              | NM_052939      | C | T | nonsynonymous SNV | G1838A  | S613N  | M16 |   | B | 4.41   |
| 1 | 158262056 | 158262056 | CD1C     | CD1c molecule                   | NM_001765      | G | A | nonsynonymous SNV | G511A   | E171K  | M16 | T | B | -1.07  |
| 1 | 158670295 | 158670295 | OR6K2    | olfactory receptor, family 6, s | NM_001005279   | G | A | stopgain          | C148T   | Q50X   | M16 | T |   | 3.73   |
| 1 | 158724778 | 158724778 | OR6K6    | olfactory receptor, family 6, s | NM_001005184   | C | T | nonsynonymous SNV | C173T   | P58L   | M16 | T | B | -0.06  |
| 1 | 162335286 | 162335286 | NOS1AP   | nitric oxide synthase 1 (neur   | NM_014697.2    | C | A | nonsynonymous SNV | C1032A  | D344E  | M16 | T | D | 5.62   |
| 1 | 169439403 | 169439403 | SLC19A2  | solute carrier family 19 (thiam | NM_006996      | G | A | nonsynonymous SNV | C829T   | L277F  | M16 | T | B | 3.97   |
| 1 | 172633498 | 172633498 | FASLG    | Fas ligand (TNF superfamily,    | NM_000639      | A | C | nonsynonymous SNV | A419C   | K140T  | M16 | T | B | 2.39   |
| 1 | 17316456  | 17316456  | ATP13A2  | ATPase type 13A2                | NM_022089.3    | G | A | stopgain          | C2455T  | R819X  | M16 | T |   | 2.53   |
| 1 | 175332847 | 175332847 | TNR      | tenascin R                      | NM_003285      | G | A | stopgain          | C2704T  | Q902X  | M16 | T |   | 4.58   |
| 1 | 175332856 | 175332856 | TNR      | tenascin R                      | NM_003285      | G | A | stopgain          | C2695T  | R899X  | M16 | T |   | 5.5    |
| 1 | 176104155 | 176104155 | RFWD2    | ring finger and WD repeat do    | NM_022457.6    | G | A | nonsynonymous SNV | C959T   | P320L  | M16 | T | D | 4.48   |
| 1 | 177901896 | 177901896 | SEC16B   | SEC16 homolog B, endoplas       | NM_033127      | A | C | nonsynonymous SNV | T2869G  | S957A  | M16 | T | D | 4.6    |
| 1 | 181686370 | 181686370 | CACNA1E  | calcium channel, voltage-dep    | NM_001205293.1 | T | C | nonsynonymous SNV | T1457C  | V486A  | M16 | D | D | 5.32   |
| 1 | 181764064 | 181764064 | CACNA1E  | calcium channel, voltage-dep    | NM_001205293.1 | C | T | nonsynonymous SNV | C6092T  | S2031F | M16 | D | P | 4.94   |
| 1 | 181767540 | 181767540 | CACNA1E  | calcium channel, voltage-dep    | NM_001205293.1 | C | T | nonsynonymous SNV | C6512T  | S2171F | M16 | D | D | 5.55   |
| 1 | 182845605 | 182845605 | DHX9     | DEAH (Asp-Glu-Ala-His) box      | NM_001357      | C | T | nonsynonymous SNV | C2053T  | P685S  | M16 | D | T | 5.54   |
| 1 | 182847164 | 182847164 | DHX9     | DEAH (Asp-Glu-Ala-His) box      | NM_001357      | T | C | nonsynonymous SNV | T2207C  | V736A  | M16 | D | P | 5.92   |
| 1 | 196887357 | 196887357 | CFHR4    | complement factor H-related     | NM_001201550.2 | G | A | nonsynonymous SNV | G1558A  | E520K  | M16 | T | P | 1.03   |
| 1 | 196964973 | 196964973 | CFHR5    | complement factor H-related     | NM_030787      | G | A | nonsynonymous SNV | G734A   | G245E  | M16 | T | D | 3.49   |
| 1 | 198498237 | 198498237 | ATP6V1G3 | ATPase, H+ transporting, lys    | NM_133262      | T | C | nonsynonymous SNV | A157G   | K53E   | M16 | D | B | 1.31   |
| 1 | 200969055 | 200969055 | KIF21B   | kinesin family member 21B       | NM_001252100.1 | G | A | stopgain          | C1723T  | Q575X  | M16 | T |   | 4.88   |
| 1 | 200977926 | 200977926 | KIF21B   | kinesin family member 21B       | NM_001252100.1 | C | T | nonsynonymous SNV | G418A   | E140K  | M16 | T | D | 5.57   |
| 1 | 201178297 | 201178297 | IGFN1    | immunoglobulin-like and fibro   | NM_001164586   | G | A | nonsynonymous SNV | G4276A  | E1426K | M16 |   |   | 1.69   |
| 1 | 201179181 | 201179181 | IGFN1    | immunoglobulin-like and fibro   | NM_001164586   | G | T | nonsynonymous SNV | G5160T  | M1720I | M16 |   |   | -0.645 |
| 1 | 201179738 | 201179738 | IGFN1    | immunoglobulin-like and fibro   | NM_001164586   | C | A | nonsynonymous SNV | C5717A  | A1906E | M16 |   |   | -5.23  |
| 1 | 201179745 | 201179745 | IGFN1    | immunoglobulin-like and fibro   | NM_001164586   | T | A | nonsynonymous SNV | T5724A  | F1908L | M16 |   |   | -3.29  |
| 1 | 203053777 | 203053777 | MYOG     | myogenin (myogenic factor 4     | NM_002479      | C | T | nonsynonymous SNV | G551A   | G184E  | M16 | T | B | 2.06   |
| 1 | 207680076 | 207680076 | CR1      | complement component (3b/4      | NM_000651.4    | C | T | nonsynonymous SNV | C319T   | P107S  | M16 | T | D | 2.94   |
| 1 | 207890877 | 207890877 | CR1L     | complement component (3b/4      | NM_175710      | C | T | nonsynonymous SNV | C1483T  | P495S  | M16 | T | B | 3.01   |
| 1 | 215960098 | 215960098 | USH2A    | Usher syndrome 2A (autoso       | NM_206933      | G | A | nonsynonymous SNV | C10301T | S3434F | M16 | T | B | 3.97   |
| 1 | 216850658 | 216850658 | ESRRG    | estrogen-related receptor ga    | NM_001438.3    | C | T | nonsynonymous SNV | G232A   | G78R   | M16 | T | D | 6.16   |
| 1 | 223568258 | 223568258 | CCDC185  | coiled-coil domain containi     | NM_152610      | G | A | nonsynonymous SNV | G1441A  | E481K  | M16 | D | P | 2.78   |
| 1 | 224008952 | 224008952 | TP53BP2  | tumor protein p53 binding pr    | NM_001031685   | A | T | nonsynonymous SNV | T145A   | C49S   | M16 | D | D | 5.75   |
| 1 | 224345354 | 224345354 | FBXO28   | F-box protein 28                | NM_015176      | C | T | nonsynonymous SNV | C1013T  | S338F  | M16 | D | B | 5.97   |
| 1 | 228506635 | 228506635 | OBSCN    | obscurin, cytoskeletal calmo    | NM_052843.3    | C | T | nonsynonymous SNV | C14182T | P4728S | M16 | T | D | 3.81   |
| 1 | 22919855  | 22919855  | EPHA8    | EPH receptor A8                 | NM_020526      | G | G | nonsynonymous SNV | C1352G  | A451G  | M16 | D | B | 4.27   |
| 1 | 22970626  | 22970626  | C1QC     | complement component 1, q       | NM_001114101.1 | C | A | nonsynonymous SNV | G110A   | G37E   | M16 | D | D | 5.26   |
| 1 | 231061316 | 231061316 | TTC13    | tetratricopeptide repeat dom    | NM_024525.4    | G | A | nonsynonymous SNV | C1535T  | S512F  | M16 | D | P | 5.75   |
| 1 | 233394089 | 233394089 | PCNXL2   | pecanex-like 2                  | NM_014801      | C | T | nonsynonymous SNV | G1519A  | G507R  | M16 | T | B | 4.15   |
| 1 | 233515429 | 233515429 | KIAA1804 | mixed lineage kinase 4          | NM_032435      | A | T | nonsynonymous SNV | A2677T  | T893S  | M16 | T | B | 3.58   |

|    |           |           |          |                                     |                |   |   |                   |        |        |     |   |   |        |
|----|-----------|-----------|----------|-------------------------------------|----------------|---|---|-------------------|--------|--------|-----|---|---|--------|
| 1  | 236729311 | 236729311 | HEATR1   | HEAT repeat containing 1            | NM_018072      | A | T | nonsynonymous SNV | T4343A | F1448Y | M16 | T | B | 4.7    |
| 1  | 243419531 | 243419531 | SDCCAG8  | serologically defined colon ca      | NM_006642      | G | A | nonsynonymous SNV | G56A   | R19Q   | M16 | T | P | 4.6    |
| 1  | 244780960 | 244780960 | C1orf101 | chromosome 1 open reading           | NM_001130957.1 | C | T | nonsynonymous SNV | C2620T | R874C  | M16 | T | D | 2.68   |
| 1  | 245849638 | 245849638 | KIF26B   | kinesin family member 26B           | NM_018012      | C | T | nonsynonymous SNV | C3353T | S1118F | M16 | D | P | 3.74   |
| 1  | 245861540 | 245861540 | KIF26B   | kinesin family member 26B           | NM_018012      | C | T | nonsynonymous SNV | C5957T | S1118F | M16 | D | P | 5.68   |
| 1  | 24786981  | 24786981  | NIPAL3   | NIPA-like domain containing         | NM_020448      | T | A | nonsynonymous SNV | T873A  | F291L  | M16 | T | D | -3.11  |
| 1  | 247875171 | 247875171 | OR6F1    | olfactory receptor, family 6, si    | NM_001005286   | T | A | nonsynonymous SNV | A887T  | E296V  | M16 | D | B | 3.49   |
| 1  | 247875270 | 247875270 | OR6F1    | olfactory receptor, family 6, si    | NM_001005286   | G | A | nonsynonymous SNV | C788T  | S263F  | M16 | D | P | 1.54   |
| 1  | 248084579 | 248084579 | OR2T8    | olfactory receptor, family 2, si    | NM_001005522   | G | A | nonsynonymous SNV | G260A  | S87N   | M16 | T | B | -6.49  |
| 1  | 248112794 | 248112794 | OR2L8    | olfactory receptor, family 2, si    | NM_001001963   | G | C | nonsynonymous SNV | G635C  | G212A  | M16 | T | B | -3.61  |
| 1  | 248344218 | 248344218 | OR2M2    | olfactory receptor, family 2, si    | NM_001004688   | G | A | nonsynonymous SNV | G931A  | E311K  | M16 | T | B | -3.33  |
| 1  | 248436683 | 248436683 | OR2T33   | olfactory receptor, family 2, si    | NM_001004695   | G | A | nonsynonymous SNV | C434T  | S145L  | M16 | D | B | -0.748 |
| 1  | 26164006  | 26164006  | AUNIP    | aurora kinase A and ninein in       | NM_001287490.1 | G | A | nonsynonymous SNV | C118T  | L40F   | M16 | T | B | -2.79  |
| 1  | 3328068   | 3328068   | PRDM16   | PR domain containing 16             | NM_022114      | C | T | nonsynonymous SNV | C1307T | S436F  | M16 | D | D | 5.26   |
| 1  | 34071511  | 34071511  | CSMD2    | CUB and Sushi multiple domi         | NM_052896      | G | A | nonsynonymous SNV | C6301T | P2101S | M16 |   |   |        |
| 1  | 3647553   | 3647553   | TP73     | tumor protein p73                   | NM_005427.3    | C | T | nonsynonymous SNV | C1408T | H470Y  | M16 | D | P | 5.13   |
| 1  | 41012675  | 41012675  | ZNF684   | zinc finger protein 684             | NM_152373      | A | C | nonsynonymous SNV | A680C  | K227T  | M16 | T | B | 1.72   |
| 1  | 41979220  | 41979220  | HIVEP3   | human immunodeficiency viru         | NM_024503.4    | C | A | nonsynonymous SNV | G5672T | R1891L | M16 | D | B | -6.49  |
| 1  | 44071282  | 44071282  | PTPRF    | protein tyrosine phosphatase        | NM_002840.3    | G | A | nonsynonymous SNV | G3472A | E1158K | M16 | T | B | 3.13   |
| 1  | 45250871  | 45250871  | BEST4    | bestrophin 4                        | NM_153274      | C | T | nonsynonymous SNV | G821A  | G274D  | M16 | T | B | 1.57   |
| 1  | 46501047  | 46501047  | MAST2    | microtubule associated serin        | NM_015112      | G | A | nonsynonymous SNV | G4706A | G1569E | M16 | T | B | -1.18  |
| 1  | 46725680  | 46725680  | RAD54L   | RAD54-like (S. cerevisiae)          | NM_003579.3    | C | T | nonsynonymous SNV | C316T  | R106C  | M16 | T | D | 5.29   |
| 1  | 47498981  | 47498981  | CYP4X1   | cytochrome P450, family 4, si       | NM_178033      | C | T | nonsynonymous SNV | C433T  | H145Y  | M16 | D | D | 2.91   |
| 1  | 50610812  | 50610812  | ELAVL4   | ELAV like neuron-specific RN        | NM_021952.4    | C | T | nonsynonymous SNV | A193T  | L65F   | M16 | D | D | 6.17   |
| 1  | 54060403  | 54060403  | GLIS1    | zinc finger, CCHC domain co         | NM_147193      | G | A | nonsynonymous SNV | C173T  | P58L   | M16 | T | B | 4.53   |
| 1  | 57169736  | 57169736  | PRKAA2   | protein kinase, AMP-activate        | NM_006252      | A | T | nonsynonymous SNV | A881T  | K294I  | M16 | T | B | 3.55   |
| 1  | 57209907  | 57209907  | C1orf168 | chromosome 1 open reading           | NM_001004303   | C | T | nonsynonymous SNV | G1420A | E474K  | M16 | T | D | 2.37   |
| 1  | 57233561  | 57233561  | C1orf168 | chromosome 1 open reading           | NM_001004303   | G | A | nonsynonymous SNV | C1004T | S335L  | M16 | T | P | 5.18   |
| 1  | 60312778  | 60312778  | HOOK1    | hook microtubule-anchoring pr       | NM_015888      | G | A | nonsynonymous SNV | G850A  | E284K  | M16 | T | D | 6.05   |
| 1  | 70505181  | 70505181  | LRRRC7   | leucine rich repeat containi        | NM_020794      | G | A | nonsynonymous SNV | G3560A | G1187E | M16 | T | P | 5.03   |
| 1  | 75702693  | 75702693  | SLC44A5  | solute carrier family 44, mem       | NM_152697.4    | C | T | nonsynonymous SNV | G719A  | R240K  | M16 | T | B | 0.193  |
| 1  | 78478831  | 78478831  | DNAJB4   | DnaJ (Hsp40) homolog, subf          | NM_007034      | G | A | nonsynonymous SNV | G308A  | G103E  | M16 | D | D | 4.46   |
| 1  | 7887537   | 7887537   | PER3     | period circadian clock 3            | NM_001289862.1 | C | T | nonsynonymous SNV | C2548T | P850S  | M16 | T | D | 0.942  |
| 1  | 79470830  | 79470830  | ELTD1    | adhesion G protein-coupled r        | NM_022159      | A | T | nonsynonymous SNV | T97A   | C33S   | M16 |   | P | 5.31   |
| 1  | 8420970   | 8420970   | REER     | arginine-glutamic acid dipept       | NM_012102.3    | G | A | nonsynonymous SNV | C2597T | P866L  | M16 | T | D | 5.18   |
| 1  | 8420971   | 8420971   | REER     | arginine-glutamic acid dipept       | NM_012102.3    | G | A | nonsynonymous SNV | C2596T | P866S  | M16 | T | D | 5.18   |
| 1  | 89834165  | 89834165  | GBP6     | guanylate binding protein fam       | NM_198460      | G | A | nonsynonymous SNV | G55A   | E19K   | M16 | T | B | 2.46   |
| 10 | 116225556 | 116225556 | ABLIM1   | actin binding LIM protein 1         | NM_002313.5    | G | A | nonsynonymous SNV | C1342T | H448Y  | M16 | T | B | 5.41   |
| 10 | 120933972 | 120933972 | PRDX3    | peroxiredoxin 3                     | NM_006793.4    | G | A | nonsynonymous SNV | C302T  | P101L  | M16 | D | D | 4.89   |
| 10 | 121551564 | 121551564 | INPP5F   | inositol polyphosphate-5-pho        | NM_001243195   | C | T | nonsynonymous SNV | C628T  | R210C  | M16 |   | B | 3.28   |
| 10 | 124909368 | 124909368 | HMX2     | H6 family homeobox 2                | NM_005519      | C | T | nonsynonymous SNV | C551T  | S184F  | M16 | D | D | 3.35   |
| 10 | 129350736 | 129350736 | NPS      | neuropeptide S                      | NM_001030013   | T | C | nonsynonymous SNV | T103C  | S35P   | M16 | T | B | -3.1   |
| 10 | 16996430  | 16996430  | CUBN     | cubilin (intrinsic factor-cobal     | NM_001081      | G | A | nonsynonymous SNV | C4813T | P1605S | M16 | T | B | -7.75  |
| 10 | 17199746  | 17199746  | TRDMT1   | tRNA aspartic acid methyltra        | NM_004412      | G | A | nonsynonymous SNV | C581T  | P194L  | M16 | T | P | 5.41   |
| 10 | 18250624  | 18250624  | SLC39A12 | solute carrier family 39 (zinc      | NM_001145195.1 | G | A | nonsynonymous SNV | G376A  | E126K  | M16 | T | B | 4.51   |
| 10 | 24762302  | 24762302  | KIAA1217 | KIAA1217                            | NM_019590.4    | C | T | nonsynonymous SNV | C992T  | P331L  | M16 | D | D | 5.74   |
| 10 | 30315955  | 30315955  | KIAA1462 | KIAA1462                            | NM_020848      | C | T | nonsynonymous SNV | G3122A | R1041Q | M16 | T | B | 1.85   |
| 10 | 31810176  | 31810176  | ZEB1     | zinc finger E-box binding hor       | NM_001128128.2 | C | T | nonsynonymous SNV | C1865T | S622L  | M16 | T | B | 4.41   |
| 10 | 37506705  | 37506705  | ANKRD30A | ANKRD30A                            | NM_052997      | G | A | nonsynonymous SNV | G2998A | E1000K | M16 | D | B | 1.9    |
| 10 | 43089641  | 43089641  | ZNF33B   | zinc finger protein 33B             | NM_006955      | C | T | nonsynonymous SNV | G757A  | G253R  | M16 | D | B | -3.62  |
| 10 | 44112386  | 44112386  | ZNF485   | zinc finger protein 485             | NM_145312      | C | T | nonsynonymous SNV | C895T  | Q299X  | M16 | T |   | 1.27   |
| 10 | 48387897  | 48387897  | RBP3     | retinol binding protein 3, inter    | NM_002900      | C | T | nonsynonymous SNV | G2981T | G994V  | M16 | D | P | 4.66   |
| 10 | 48428871  | 48428871  | GDF10    | growth differentiation factor 1     | NM_004962      | C | T | nonsynonymous SNV | G1015A | D339N  | M16 | T | B | 5.3    |
| 10 | 61833782  | 61833782  | ANK3     | ankyrin 3, node of Ranvier (a       | NM_020987      | G | A | nonsynonymous SNV | C6857T | P2286L | M16 | D | D | 5.92   |
| 10 | 61834035  | 61834035  | ANK3     | ankyrin 3, node of Ranvier (a       | NM_020987      | C | T | nonsynonymous SNV | G6604A | E2202K | M16 | D | B | 6.05   |
| 10 | 61834036  | 61834036  | ANK3     | ankyrin 3, node of Ranvier (a       | NM_020987      | C | T | nonsynonymous SNV | G6603A | M2201I | M16 | T | B | 4.16   |
| 10 | 61967957  | 61967957  | ANK3     | ankyrin 3, node of Ranvier (a       | NM_020987      | C | T | nonsynonymous SNV | G1031A | G344E  | M16 | D | D | 4.78   |
| 10 | 68526075  | 68526075  | CTNNA3   | catenin (cadherin-associated        | NM_013266.3    | C | T | nonsynonymous SNV | G1228A | E410K  | M16 | T | D | 6.17   |
| 10 | 70405014  | 70405014  | TET1     | tet methylcytosine dioxygena        | NM_030625      | T | A | nonsynonymous SNV | T2528A | I843K  | M16 | D | B | -0.647 |
| 10 | 73121791  | 73121791  | SLC29A3  | solute carrier family 29 (equil     | NM_018344      | C | T | nonsynonymous SNV | C854T  | S285L  | M16 | T | B | -3.01  |
| 10 | 78778807  | 78778807  | KCNMA1   | potassium channel, calcium $\alpha$ | NM_001014797.2 | C | T | nonsynonymous SNV | G1991A | G664E  | M16 | D | D | 5.49   |
| 10 | 81929029  | 81929029  | ANXA11   | annexin A11                         | NM_001157.2    | G | A | nonsynonymous SNV | C257T  | P86L   | M16 | T | B | 3.05   |
| 10 | 81929030  | 81929030  | ANXA11   | annexin A11                         | NM_001157.2    | G | A | nonsynonymous SNV | C256T  | P86S   | M16 | T | B | 4.9    |
| 10 | 82298121  | 82298121  | SH2D4B   | SH2 domain containing 4B            | NM_207372      | G | T | nonsynonymous SNV | G34T   | D12Y   | M16 | D | D | 5.53   |
| 10 | 89690811  | 89690811  | PTEN     | phosphatase and tensin hom          | NM_000314      | A | T | nonsynonymous SNV | A218T  | E73V   | M16 | D | D | 5.62   |
| 10 | 90524299  | 90524299  | LIPN     | lipase, family member N             | NM_001102469   | G | A | nonsynonymous SNV | G359A  | R120Q  | M16 | D | D | 4.52   |
| 10 | 96580331  | 96580331  | CYP2C19  | cytochrome P450, family 2, si       | NM_000769      | G | A | nonsynonymous SNV | G898A  | E300K  | M16 | D | D | 3.95   |

|    |           |           |           |                                 |                |   |   |                   |        |        |     |   |     |          |
|----|-----------|-----------|-----------|---------------------------------|----------------|---|---|-------------------|--------|--------|-----|---|-----|----------|
| 10 | 96708988  | 96708988  | CYP2C9    | cytochrome P450, family 2, s    | NM_000771      | G | A | nonsynonymous SNV | G766A  | D256N  | M16 | D | B   | 2.38     |
| 11 | 1016406   | 1016406   | MUC6      | mucin 6, oligomeric mucus/g     | NM_005961      | G | A | nonsynonymous SNV | C6395T | S2132F | M16 | D | B   | 0.796    |
| 11 | 123909690 | 123909690 | OR10G7    | olfactory receptor, family 10,  | NM_001004463   | G | C | nonsynonymous SNV | C19G   | L7V    | M16 |   |     |          |
| 11 | 134244947 | 134244947 | GLB1L2    | galactosidase, beta 1-like 2    | NM_138342      | A | G | nonsynonymous SNV | A1906G | K636E  | M16 | T | B   | -8.68    |
| 11 | 134244948 | 134244948 | GLB1L2    | galactosidase, beta 1-like 2    | NM_138342      | A | G | nonsynonymous SNV | A1907G | K636R  | M16 | D | B   | 4.17     |
| 11 | 1908086   | 1908086   | LSP1      | lymphocyte-specific protein 1   | NM_002124293.1 | C | T | nonsynonymous SNV | C1226T | P409L  | M16 | D | P   | 3.3      |
| 11 | 19259595  | 19259595  | E2F8      | E2F transcription factor 8      | NM_024680.3    | C | T | nonsynonymous SNV | G100A  | E34K   | M16 | D | B   | 5.05     |
| 11 | 22257764  | 22257764  | ANO5      | anoctamin 5                     | NM_213599.2    | T | C | nonsynonymous SNV | T704C  | F235S  | M16 | T | B   | 5.77     |
| 11 | 30033267  | 30033267  | KCNA4     | potassium channel, voltage g    | NM_002233      | G | A | nonsynonymous SNV | C959T  | S320F  | M16 | D | D   | 5.16     |
| 11 | 36614527  | 36614527  | RAG2      | recombination activating gene   | NM_000536.3    | C | T | nonsynonymous SNV | G1192A | E398K  | M16 | D | P   | 4.53     |
| 11 | 44253940  | 44253940  | EXT2      | exostosin glycosyltransferase   | NM_000401.3    | C | T | nonsynonymous SNV | C1799T | P600L  | M16 | T | D   | 5.16     |
| 11 | 4608285   | 4608285   | OR52I2    | olfactory receptor, family 52,  | NM_001005170   | G | A | nonsynonymous SNV | G243A  | M81I   | M16 | T | B   | 3.15     |
| 11 | 46404254  | 46404254  | MDK       | midkine (neurite growth-prom    | NM_001012334.2 | G | A | nonsynonymous SNV | G362T  | R121L  | M16 | T | b   | 3.84     |
| 11 | 46748083  | 46748083  | F2        | coagulation factor II (thrombin | NM_000506      | G | T | nonsynonymous SNV | G910A  | D304N  | M16 | D | B   | 2        |
| 11 | 46896462  | 46896462  | LRP4      | low density lipoprotein recept  | NM_002334      | T | C | nonsynonymous SNV | A4118G | D1373G | M16 | D | P   | 5.67     |
| 11 | 4790462   | 4790462   | OR51F1    | olfactory receptor, family 51,  | NM_001004752   | C | T | nonsynonymous SNV | G686A  | R229K  | M16 | T | B   | -2.13    |
| 11 | 48177364  | 48177364  | PTPRJ     | protein tyrosine phosphatase    | NM_002843      | C | T | nonsynonymous SNV | C3241T | R1081C | M16 | D | D   | 5.65     |
| 11 | 4945302   | 4945302   | OR51G1    | olfactory receptor, family 51,  | NM_001005237   | C | T | nonsynonymous SNV | G268A  | D90N   | M16 | T | B   | 3.26     |
| 11 | 50003617  | 50003617  | OR4C12    | olfactory receptor, family 4,   | NM_001005270   | G | A | nonsynonymous SNV | C421T  | L141F  | M16 | T | B   | 2.98     |
| 11 | 55111078  | 55111078  | OR4A16    | olfactory receptor, family 4,   | NM_001005274   | G | A | nonsynonymous SNV | G402A  | M134I  | M16 | D | B   | 2.69     |
| 11 | 55339891  | 55339891  | OR4C16    | olfactory receptor, family 4,   | NM_001004701   | G | A | nonsynonymous SNV | G288A  | M96I   | M16 | T | B   | -7.33    |
| 11 | 55418495  | 55418495  | OR4S2     | olfactory receptor, family 4,   | NM_001004059   | G | A | nonsynonymous SNV | G116A  | G39E   | M16 | D | D   | 5.36     |
| 11 | 55681275  | 55681275  | OR5W2     | olfactory receptor, family 5,   | NM_001001960   | G | A | nonsynonymous SNV | C784T  | P262S  | M16 | D | P   | 5.01     |
| 11 | 57955447  | 57955447  | OR10Q1    | olfactory receptor, family 10,  | NM_001004471   | C | T | nonsynonymous SNV | G901A  | D301N  | M16 | D | D   | 5.07     |
| 11 | 62189842  | 62189842  | SCGB1A1   | secretoglobulin, family 1A, mer | NM_003357      | C | T | nonsynonymous SNV | C205T  | L69F   | M16 | D | P   | 1.53     |
| 11 | 64811819  | 64811819  | SAC3D1    | SAC3 domain containing 1        | NM_0132299     | C | T | nonsynonymous SNV | C697T  | R233C  | M16 | D | D   | 4.4      |
| 11 | 66192028  | 66192028  | NPAS4     | neuronal PAS domain protein     | NM_178864      | A | G | nonsynonymous SNV | A1667G | N556S  | M16 | T | B   | 1.09     |
| 11 | 68475844  | 68475844  | MTL5      | metallothionein-like 5, testis- | NM_004923      | C | T | nonsynonymous SNV | G1459A | E487K  | M16 | D | D   | 5.32     |
| 11 | 6964819   | 6964819   | ZNF215    | zinc finger protein 215         | NM_013250      | G | T | nonsynonymous SNV | G659T  | S220I  | M16 | T | B   | -2.36    |
| 11 | 74914466  | 74914466  | SLCO2B1   | solute carrier organic anion tr | NM_007256.4    | G | A | nonsynonymous SNV | G1943A | R648Q  | M16 | D | D   | 5.24     |
| 11 | 78467965  | 78467965  | TENM4     | teneurin transmembrane prot     | NM_001098816   | C | T | nonsynonymous SNV | G2641A | E881K  | M16 |   | D   | 4.22     |
| 11 | 7960352   | 7960352   | OR10A3    | olfactory receptor, family 10,  | NM_001003745   | G | A | nonsynonymous SNV | C716T  | S239F  | M16 | D | D   | 4.74     |
| 11 | 94758846  | 94758846  | KDM4E     | lysine (K)-specific demethylas  | NM_001161630   | A | G | nonsynonymous SNV | A125G  | Q42R   | M16 | T | B   | 0.198    |
| 12 | 10772847  | 10772847  | STYK1     | serine/threonine/tyrosine kina  | NM_018423      | C | T | nonsynonymous SNV | G1165A | D389N  | M16 | T | D   | 4.96     |
| 12 | 10954619  | 10954619  | TAS2R7    | taste receptor, type 2, membe   | NM_023919      | A | T | stopgain          | T551A  | L184X  | M16 | T |     | 3.02     |
| 12 | 11420912  | 11420912  | PRB3      | proline-rich protein BstNI sub  | NM_006249      | C | T | nonsynonymous SNV | G271A  | G91S   | M16 | T |     | P -0.531 |
| 12 | 11461786  | 11461786  | PRB4      | proline-rich protein BstNI sub  | NM_002723.4    | C | T | nonsynonymous SNV | G131A  | G44E   | M16 | D | D   | 0.769    |
| 12 | 122691349 | 122691349 | B3GNT4    | UDP-GlcNAc:betaGal beta-1,      | NM_030765      | G | A | stopgain          | G551A  | W184X  | M16 | T |     | 5.2      |
| 12 | 124350615 | 124350615 | DNAH10    | dynein, axonemal, heavy cha     | NM_207437      | A | T | nonsynonymous SNV | A6808T | N2270Y | M16 | D | B   | 4.81     |
| 12 | 14834382  | 14834382  | GUCY2C    | guanylate cyclase 2C            | NM_004963      | G | A | nonsynonymous SNV | C641T  | S214F  | M16 | D | P   | 5.78     |
| 12 | 15095599  | 15095599  | ARHGDI1   | Rho GDP dissociation inhibito   | NM_001175      | A | G | nonsynonymous SNV | T463C  | F155L  | M16 | T | P   | 4.41     |
| 12 | 21069050  | 21069050  | SLCO1B3   | solute carrier organic anion tr | NM_019844.3    | G | A | nonsynonymous SNV | G1978A | D660N  | M16 | T | B   | 1.62     |
| 12 | 22025564  | 22025564  | ABCC9     | ATP-binding cassette, sub-fai   | NM_005691.3    | C | T | stopgain          | G2193A | W731X  | M16 | T |     | 5.48     |
| 12 | 4383387   | 4383387   | CCND2     | cyclin D2                       | NM_001759      | A | C | nonsynonymous SNV | A181C  | T61P   | M16 | T | B   | 4.17     |
| 12 | 48866827  | 48866827  | ANP32D    | acidic (leucine-rich) nuclear p | NM_012404      | A | G | nonsynonymous SNV | A380G  | N127S  | M16 | T | B   | 0.115    |
| 12 | 5020986   | 5020986   | KCNA1     | potassium channel, voltage g    | NM_000217      | G | A | nonsynonymous SNV | G442A  | E148K  | M16 | T | B   | 4.35     |
| 12 | 52714927  | 52714927  | KRT83     | keratin 83, type II             | NM_002282      | C | T | nonsynonymous SNV | G193A  | G65R   | M16 | T | B   | 3.8      |
| 12 | 52910916  | 52910916  | KRT5      | keratin 5, type II              | NM_000424      | G | A | nonsynonymous SNV | C1193T | A398V  | M16 | D | B   | 4.8      |
| 12 | 55420987  | 55420987  | NEUROD4   | neuronal differentiation 4      | NM_021191      | C | T | nonsynonymous SNV | C764T  | P255L  | M16 | D | D   | 5.85     |
| 12 | 55820189  | 55820189  | OR6C76    | olfactory receptor, family 6, s | NM_001005183   | C | T | nonsynonymous SNV | C152T  | S51F   | M16 | T | B   | 4.35     |
| 12 | 57648645  | 57648645  | R3HDM2    | R3H domain containing 2         | NM_014925      | G | A | nonsynonymous SNV | C2842T | R948C  | M16 | D | P   | 5.32     |
| 12 | 6105299   | 6105299   | VWF       | von Willebrand factor           | NM_000552      | G | A | stopgain          | C5932T | Q1978X | M16 | T |     | 3.63     |
| 12 | 6435679   | 6435679   | PLEKHG6   | pleckstrin homology domain      | NM_018173.3    | C | T | nonsynonymous SNV | C1610T | S537F  | M16 | D | P   | 0.662    |
| 12 | 66700185  | 66700185  | HELB      | helicase (DNA) B                | NM_033647      | T | C | nonsynonymous SNV | T668C  | V223A  | M16 |   | B   | 3.53     |
| 12 | 75436128  | 75436128  | KCNK2     | potassium channel, voltage g    | NM_139136      | C | T | nonsynonymous SNV | G1807A | E118D  | M16 | T | B   | 5.87     |
| 12 | 76788484  | 76788484  | OSBPL8    | oxysterol binding protein-like  | NM_020841.4    | G | A | nonsynonymous SNV | C698T  | E118D  | M16 | D | D   | 3.7      |
| 12 | 80982053  | 80982053  | PTPRQ     | protein tyrosine phosphatase    | NM_001145026   | G | A | stopgain          | G3915A | W1305X | M16 |   |     | 5.35     |
| 12 | 81067024  | 81067024  | PTPRQ     | protein tyrosine phosphatase    | NM_001145026   | G | A | nonsynonymous SNV | G6163A | D2055N | M16 | D | D   | 5.78     |
| 13 | 114434293 | 114434293 | GRK1      | G protein-coupled receptor ki   | NM_002929      | C | T | nonsynonymous SNV | C1171T | P391S  | M16 | D | P   | 3.64     |
| 13 | 19997242  | 19997242  | TPTE2     | transmembrane phosphoinos       | NM_199254.2    | G | A | nonsynonymous SNV | C1529T | P510L  | M16 |   | 0 B | 1.08     |
| 13 | 29608058  | 29608058  | MTUS2     | microtubule associated tumor    | NM_001033602   | C | A | nonsynonymous SNV | C2272A | P758T  | M16 |   | D   | 4.61     |
| 13 | 35632872  | 35632872  | NBEA      | neurobeachin                    | NM_015678      | C | T | nonsynonymous SNV | C1111T | L371F  | M16 | D | D   | 5.43     |
| 13 | 41766983  | 41766983  | KBTBD7    | kelch repeat and BTB (POZ)      | NM_032138      | G | A | nonsynonymous SNV | C1411T | P471S  | M16 | T | D   | 5.5      |
| 13 | 46946138  | 46946138  | KIAA0226L | KIAA0226-like                   | NM_025113.3    | G | A | nonsynonymous SNV | C473T  | P158L  | M16 | T | B   | 3.96     |
| 13 | 51935422  | 51935422  | SERPINE3  | serpin peptidase inhibitor, cla | NM_001101320   | G | A | nonsynonymous SNV | G1009A | G337S  | M16 | D | B   | 2.9      |
| 13 | 60435628  | 60435628  | DIAPH3    | diaphanous-related formin 3     | NM_001042517.1 | G | A | nonsynonymous SNV | C2650T | H884Y  | M16 | D | D   | 5.38     |
| 14 | 20665925  | 20665925  | OR11G2    | olfactory receptor, family 11,  | NM_001005503   | C | T | nonsynonymous SNV | C431T  | S144F  | M16 | T | D   | 4.93     |

|    |           |           |           |                                       |                |   |   |                   |        |        |     |   |   |        |
|----|-----------|-----------|-----------|---------------------------------------|----------------|---|---|-------------------|--------|--------|-----|---|---|--------|
| 14 | 20692716  | 20692716  | OR11H6    | olfactory receptor, family 11, s      | NM_001004480   | G | A | nonsynonymous SNV | G848A  | G283E  | M16 | T | B | 3.14   |
| 14 | 21992054  | 21992054  | SALL2     | spalt-like transcription factor 2     | NM_005407.2    | C | T | nonsynonymous SNV | G1808A | G603E  | M16 | T | B | 3.88   |
| 14 | 21993446  | 21993446  | SALL2     | spalt-like transcription factor 2     | NM_005407.2    | C | G | nonsynonymous SNV | G416C  | G139A  | M16 | T | B | 4.22   |
| 14 | 23855298  | 23855298  | MYH6      | myosin, heavy chain 6, cardiac        | NM_002471      | C | T | nonsynonymous SNV | G5002A | D1668N | M16 | D | D | 4.05   |
| 14 | 35245502  | 35245502  | BAZ1A     | bromodomain adjacent to zinc          | NM_013448.2    | G | A | nonsynonymous SNV | C2456T | S819F  | M16 | D | D | 5.75   |
| 14 | 38060761  | 38060761  | FOXA1     | forkhead box A1                       | NM_004496      | C | T | nonsynonymous SNV | G1228A | E410K  | M16 | D | D | 4.29   |
| 14 | 52899209  | 52899209  | TXNDC16   | thioredoxin domain containing         | NM_020784.2    | A | G | nonsynonymous SNV | T2291C | V764A  | M16 | T | B | -7.87  |
| 14 | 61180403  | 61180403  | SIX4      | SIX homeobox 4                        | NM_017420      | G | A | nonsynonymous SNV | C2068T | P690S  | M16 | T | B | 3.78   |
| 14 | 63174495  | 63174495  | KCNH5     | potassium channel, voltage gated      | NM_139318      | G | A | nonsynonymous SNV | C2698T | P900S  | M16 | T | B | 5.44   |
| 14 | 65253298  | 65253298  | SPTB      | spectrin, beta, erythrocytic          | NM_001024858.2 | G | A | nonsynonymous SNV | C3385T | Q1129X | M16 | T |   | 3.02   |
| 14 | 70634091  | 70634091  | SLC8A3    | solute carrier family 8 (sodium)      | NM_183002.2    | C | T | nonsynonymous SNV | G1049A | S350N  | M16 | D | D | 5.85   |
| 14 | 75514207  | 75514207  | MLH3      | mutL homolog 3                        | NM_001040108.1 | G | A | nonsynonymous SNV | C2152T | P718S  | M16 | T | B | 2.62   |
| 14 | 75991472  | 75991472  | BATF      | basic leucine zipper transcription    | NM_006399      | C | T | nonsynonymous SNV | C109T  | R37C   | M16 | D | D | 5.71   |
| 14 | 92949171  | 92949171  | SLC24A4   | solute carrier family 24 (sodium)     | NM_153646.3    | C | T | nonsynonymous SNV | C1403T | S468F  | M16 | D | D | 5.74   |
| 14 | 94526808  | 94526808  | DDX24     | DEAD (Asp-Glu-Ala-Asp) box            | NM_020414      | G | A | nonsynonymous SNV | C1549T | P517S  | M16 | T | B | 5.36   |
| 14 | 94752521  | 94752521  | SERPINA10 | serpin peptidase inhibitor, class     | NM_016186.2    | C | T | nonsynonymous SNV | G1067A | G356E  | M16 | D | D | 4.45   |
| 14 | 94964692  | 94964692  | SERPINA12 | serpin peptidase inhibitor, class     | NM_178850      | G | A | nonsynonymous SNV | C43T   | L15F   | M16 | T | P | 3.55   |
| 14 | 95670076  | 95670076  | CLMN      | calmin (calponin-like, transmembrane) | NM_024734      | G | A | nonsynonymous SNV | C1610T | S537F  | M16 | D | P | 4.33   |
| 15 | 101569214 | 101569214 | LRRK1     | leucine-rich repeat kinase 1          | NM_024652      | C | T | nonsynonymous SNV | C2740T | H914Y  | M16 | T | P | 5.12   |
| 15 | 33925277  | 33925277  | RYR3      | ryanodine receptor 3                  | NM_001036.4    | A | G | nonsynonymous SNV | A2995G | I999V  | M16 | T | D | 3.06   |
| 15 | 40093784  | 40093784  | GPR176    | G protein-coupled receptor 176        | NM_007223.2    | C | T | nonsynonymous SNV | G1097A | G366D  | M16 | D | D | 6.17   |
| 15 | 42373759  | 42373759  | PLA2G4D   | phospholipase A2, group IVD           | NM_178034      | G | A | nonsynonymous SNV | C875T  | A292V  | M16 | T | P | 3.67   |
| 15 | 43622033  | 43622033  | LCMT2     | leucine carboxyl methyltransferase    | NM_014793      | C | T | nonsynonymous SNV | G655A  | E219K  | M16 | D | D | 5.39   |
| 15 | 45059486  | 45059486  | TRIM69    | tripartite motif containing 69        | NM_182985.4    | A | G | nonsynonymous SNV | A1019G | K340R  | M16 | D | B | 5.5    |
| 15 | 48595048  | 48595048  | SLC12A1   | solute carrier family 12 (sodium)     | NM_000338.2    | G | A | nonsynonymous SNV | G3266A | G1089E | M16 | D | D | 5.86   |
| 15 | 49917531  | 49917531  | DTWD1     | DTW domain containing 1               | NM_020234.5    | C | T | nonsynonymous SNV | C167T  | S56L   | M16 |   | B | 5.09   |
| 15 | 57999064  | 57999064  | POLR2M    | polymerase (RNA) II (DNA directed)    | NM_015532.4    | C | A | nonsynonymous SNV | C24A   | F8L    | M16 | T | B | 4.67   |
| 15 | 60643445  | 60643445  | ANXA2     | annexin A2                            | NM_001002858.2 | A | G | nonsynonymous SNV | T838C  | C280R  | M16 | D | D | 4.3    |
| 15 | 65234706  | 65234706  | ANKDD1A   | ankyrin repeat and death domain       | NM_182703      | C | T | nonsynonymous SNV | R910T  | P304S  | M16 | T | D | 3.95   |
| 15 | 65234707  | 65234707  | ANKDD1A   | ankyrin repeat and death domain       | NM_182703      | C | T | nonsynonymous SNV | C911T  | P304L  | M16 | T | P | 4.87   |
| 15 | 69560649  | 69560649  | GLCE      | glucuronic acid epimerase             | NM_015554      | C | T | nonsynonymous SNV | C920T  | S307F  | M16 | D | P | 5.6    |
| 15 | 75042710  | 75042710  | CYP1A2    | cytochrome P450, family 1, sub        | NM_000761      | G | A | nonsynonymous SNV | G631A  | E211K  | M16 | D | B | 0.232  |
| 15 | 75660469  | 75660469  | MAN2C1    | mannosidase, alpha, class 2C          | NM_006715.3    | C | T | nonsynonymous SNV | G172A  | E58K   | M16 | T | B | 0.723  |
| 15 | 79051801  | 79051801  | ADAMTS7   | ADAM metalloproteinase with           | NM_014272      | C | A | nonsynonymous SNV | G5023T | A1675S | M16 | T | B | 0.947  |
| 15 | 79051846  | 79051846  | ADAMTS7   | ADAM metalloproteinase with           | NM_014272      | T | C | nonsynonymous SNV | A4978G | I1660V | M16 | T | B | -0.818 |
| 15 | 79058951  | 79058951  | ADAMTS7   | ADAM metalloproteinase with           | NM_014272      | C | T | nonsynonymous SNV | A3302G | H1101R | M16 | T | B | -2.73  |
| 15 | 80762683  | 80762683  | ARNT2     | aryl-hydrocarbon receptor nuclear     | NM_014862      | C | T | nonsynonymous SNV | C319T  | R107C  | M16 | D | D | 5      |
| 15 | 81631768  | 81631768  | TMC3      | transmembrane channel-like            | NM_001080532   | C | T | nonsynonymous SNV | G1922A | R641Q  | M16 | T | B | 2.9    |
| 15 | 82512139  | 82512139  | EFTUD1    | elongation factor Tu GTP binding      | NM_024580.5    | T | A | nonsynonymous SNV | A1465T | S489C  | M16 | D | P | 3.12   |
| 15 | 89400401  | 89400401  | ACAN      | aggrecan                              | NM_013227.3    | C | T | nonsynonymous SNV | C4585T | P1529S | M16 | T | D | 2.38   |
| 15 | 89400818  | 89400818  | ACAN      | aggrecan                              | NM_013227.3    | G | A | nonsynonymous SNV | G5002A | E1668K | M16 | D | D | 5.86   |
| 15 | 89416190  | 89416190  | ACAN      | aggrecan                              | NM_013227.3    | G | A | nonsynonymous SNV | G7267A | E2423K | M16 | D | D | 5.26   |
| 15 | 90764695  | 90764695  | SEMA4B    | sema domain, immunoglobulin           | NM_020210.3    | C | T | nonsynonymous SNV | C692T  | S231F  | M16 | T | P | 5.46   |
| 15 | 91292685  | 91292685  | BLM       | Bloom syndrome, RecQ helicase         | NM_000057.3    | A | G | nonsynonymous SNV | A187G  | K63E   | M16 | D | B | 4.65   |
| 15 | 91527990  | 91527990  | PRC1      | protein regulator of cytokinesis      | NM_003981      | C | T | nonsynonymous SNV | G77A   | W26X   | M16 | T |   | 5.65   |
| 15 | 93485138  | 93485138  | CHD2      | chromodomain helicase DNA             | NM_001271      | G | A | nonsynonymous SNV | G779A  | S260N  | M16 | T | B | 5.37   |
| 15 | 18880555  | 18880555  | SMG1      | SMG1 phosphatidylinositol 3-          | NM_015092      | G | A | nonsynonymous SNV | C2704T | P902S  | M16 | T | D | 5.22   |
| 16 | 2031176   | 2031176   | NOXO1     | NADPH oxidase organizer 1             | NM_144603.3    | G | T | nonsynonymous SNV | C5A    | A2E    | M16 | T | B | 1.47   |
| 16 | 20492161  | 20492161  | ACSM2A    | acyl-CoA synthetase medium            | NM_001010845   | C | T | nonsynonymous SNV | C1427T | S476L  | M16 | D | P | 2.17   |
| 16 | 21049192  | 21049192  | DNAH3     | dynein, axonemal, heavy chain         | NM_017539      | C | T | nonsynonymous SNV | G4841A | G1614E | M16 | D | D | 5.76   |
| 16 | 22926708  | 22926708  | HS3ST2    | heparan sulfate (glucosaminyl         | NM_006043      | G | A | nonsynonymous SNV | G929A  | G310E  | M16 | D | D | 5.11   |
| 16 | 24895381  | 24895381  | SLC5A11   | solute carrier family 5 (sodium)      | NM_052944.4    | C | T | nonsynonymous SNV | C593T  | A198V  | M16 | T | P | 5.11   |
| 16 | 28944232  | 28944232  | CD19      | CD19 molecule                         | NM_001178098.1 | G | A | nonsynonymous SNV | G356A  | G119E  | M16 | T | B | 3.71   |
| 16 | 420004    | 420004    | MRPL28    | mitochondrial ribosomal protein       | NM_006428      | G | A | nonsynonymous SNV | C215T  | P72L   | M16 | T | D | 3.89   |
| 16 | 46940844  | 46940844  | GPT2      | glutamic pyruvate transaminase        | NM_133443.3    | C | T | nonsynonymous SNV | C533T  | P178L  | M16 | T | B | 4.8    |
| 16 | 55727927  | 55727927  | SLC6A2    | solute carrier family 6 (neurotrans   | NM_001172504.1 | G | A | nonsynonymous SNV | G924A  | W308X  | M16 | T | O | 4.57   |
| 16 | 55862775  | 55862775  | CES1      | carboxylesterase 1                    | NM_001025195.1 | G | A | nonsynonymous SNV | C164T  | P55L   | M16 | D | D | 4.48   |
| 16 | 58585615  | 58585615  | CNOT1     | CCR4-NOT transcription complex        | NM_016284.4    | G | A | nonsynonymous SNV | C3079T | P1027S | M16 | T | B | 5.41   |
| 16 | 67405015  | 67405015  | LRRC36    | leucine rich repeat containing        | NM_018296.5    | G | A | nonsynonymous SNV | G1364A | G455E  | M16 | T | P | 2.67   |
| 16 | 88503168  | 88503168  | ZNF469    | zinc finger protein 469               | NM_001127464   | G | A | nonsynonymous SNV | G9206A | G3069E | M16 | T | B | -3.57  |
| 17 | 10247210  | 10247210  | MYH13     | myosin, heavy chain 13, skeletal      | NM_003802      | C | T | nonsynonymous SNV | G1801A | D601N  | M16 | D | D | 4.33   |
| 17 | 12666536  | 12666536  | MYOCD     | myocardin                             | NM_001146312.2 | C | T | nonsynonymous SNV | C2536T | P846S  | M16 | T | B | 6.08   |
| 17 | 18023016  | 18023016  | MYO15A    | myosin XVA                            | NM_016239      | C | T | nonsynonymous SNV | C902T  | P301L  | M16 | T | B | 3.51   |
| 17 | 26092620  | 26092620  | NOS2      | nitric oxide synthase 2, inducible    | NM_000625      | C | A | nonsynonymous SNV | G2369T | R790L  | M16 | D | P | 5.19   |
| 17 | 26943509  | 26943509  | KIAA0100  | KIAA0100                              | NM_014680      | G | A | nonsynonymous SNV | C6176T | P2059L | M16 | T | B | 6.11   |
| 17 | 27215999  | 27215999  | FLOT2     | flotillin 2                           | NM_004475      | C | T | nonsynonymous SNV | G95A   | W32X   | M16 | T |   | 5.8    |
| 17 | 29654691  | 29654691  | NF1       | neurofibromin 1                       | NM_001042492   | C | T | nonsynonymous SNV | C5443T | Q1815X | M16 | T |   | 5.99   |

|    |          |          |           |                                                           |                |   |   |                   |        |        |     |   |   |       |
|----|----------|----------|-----------|-----------------------------------------------------------|----------------|---|---|-------------------|--------|--------|-----|---|---|-------|
| 17 | 33690337 | 33690337 | SLFN11    | schlafen family member 11                                 | NM_001104587.1 | C | T | nonsynonymous SNV | G490A  | G164R  | M16 | T | B | -5.25 |
| 17 | 39525935 | 39525935 | KRT33B    | keratin 33B, type I                                       | NM_002279      | G | A | nonsynonymous SNV | C68T   | P23L   | M16 | T | B | 4.44  |
| 17 | 39643373 | 39643373 | KRT36     | keratin 36, type I                                        | NM_003771      | G | A | nonsynonymous SNV | C1037T | S346F  | M16 | D | D | 4.96  |
| 17 | 39780517 | 39780517 | KRT17     | keratin 17, type I                                        | NM_000422      | C | A | nonsynonymous SNV | G245A  | G82E   | M16 | D | P | 4.25  |
| 17 | 40831669 | 40831669 | CCR10     | chemokine (C-C motif) receptor 10                         | NM_016602      | G | T | nonsynonymous SNV | C991T  | P331S  | M16 | T | B | -4.01 |
| 17 | 42335497 | 42335497 | SLC4A1    | solute carrier family 4 (anion) 1                         | NM_000342      | C | T | nonsynonymous SNV | G1139A | G380E  | M16 | D | D | 4.82  |
| 17 | 42426834 | 42426834 | GRN       | granulin                                                  | NM_002087      | C | T | nonsynonymous SNV | C179T  | P60L   | M16 | T | B | 2.54  |
| 17 | 42828203 | 42828203 | DBF4B     | DBF4 zinc finger B                                        | NM_145663      | C | T | nonsynonymous SNV | C1430T | P477L  | M16 |   | B | -5    |
| 17 | 43313510 | 43313510 | FMNL1     | formin-like 1                                             | NM_005892      | C | A | nonsynonymous SNV | C622A  | P208T  | M16 | T | B | 2.94  |
| 17 | 44039785 | 44039785 | MAPT      | microtubule-associated protein tau                        | NM_001123066.3 | G | A | nonsynonymous SNV | G82A   | G28S   | M16 | D | B | 2.8   |
| 17 | 46628262 | 46628262 | HOXB3     | homeobox B3                                               | NM_002146      | T | C | nonsynonymous SNV | A730G  | K244E  | M16 | D | B | 3.66  |
| 17 | 47122365 | 47122365 | IGF2BP1   | insulin-like growth factor 2 mRNA binding protein 1       | NM_006546.3    | G | A | nonsynonymous SNV | G1333A | E445K  | M16 | T | D | 5.01  |
| 17 | 47247037 | 47247037 | B4GALNT2  | beta-1,4-N-acetyl-galactosaminyltransferase 2             | NM_153446.2    | C | T | stopgain          | C1648T | Q550X  | M16 | T |   | 2.41  |
| 17 | 48186067 | 48186067 | PKD2      | pyruvate dehydrogenase kinase PDK2                        | NM_002611.4    | C | T | nonsynonymous SNV | C953T  | T318I  | M16 | D | B | 3.94  |
| 17 | 48271805 | 48271805 | COL1A1    | collagen, type I, alpha 1                                 | NM_000088      | G | A | nonsynonymous SNV | C1519T | P507S  | M16 | T | B | 2.61  |
| 17 | 48653174 | 48653174 | CACNA1G   | calcium channel, voltage-dependent L-type                 | NM_018896.4    | C | T | nonsynonymous SNV | C1411T | L471F  | M16 | T | B | 3.16  |
| 17 | 48918243 | 48918243 | WFIKK2    | WAP, follistatin/kazal, immunoglobulin-like domain 2      | NM_175575      | G | A | nonsynonymous SNV | G1594A | E532K  | M16 | T | B | 5.12  |
| 17 | 5076229  | 5076229  | USP6      | ubiquitin specific peptidase 6                            | NM_004505      | G | A | nonsynonymous SNV | G4177A | E1393K | M16 | D | D | 2.35  |
| 17 | 54969098 | 54969098 | TRIM25    | tripartite motif containing 25                            | NM_005082      | G | A | nonsynonymous SNV | C1856T | S619F  | M16 | D | D | 4.87  |
| 17 | 56383766 | 56383766 | BZRAP1    | benzodiazepine receptor (per) 1                           | NM_004758.3    | G | A | nonsynonymous SNV | C5161T | P1721S | M16 | T | B | 1.8   |
| 17 | 56386068 | 56386068 | BZRAP1    | benzodiazepine receptor (per) 1                           | NM_004758.3    | G | A | nonsynonymous SNV | C4565T | P1522L | M16 | T | B | 2.19  |
| 17 | 56386069 | 56386069 | BZRAP1    | benzodiazepine receptor (per) 1                           | NM_004758.3    | G | A | nonsynonymous SNV | C4564T | P1522S | M16 | T | B | 3.36  |
| 17 | 65052241 | 65052241 | CACNG1    | calcium channel, voltage-dependent N-type                 | NM_000727      | G | A | nonsynonymous SNV | G523A  | E175K  | M16 | T | B | 0.276 |
| 17 | 65346383 | 65346383 | PSMD12    | proteasome (prosome, macropain) 12                        | NM_002816.3    | G | A | stopgain          | C367T  | R123X  | M16 | T |   | 3.87  |
| 17 | 66891080 | 66891080 | ABCA8     | ATP-binding cassette, subfamily A, member 8               | NM_001288985.1 | T | C | nonsynonymous SNV | A2839G | R123X  | M16 | T | D | 3.73  |
| 17 | 73832722 | 73832722 | UNC13D    | unc-13 homolog D (C. elegans)                             | NM_199242      | A | G | nonsynonymous SNV | T1229C | I410T  | M16 | D | P | 3.25  |
| 17 | 73843907 | 73843907 | WBP2      | WW domain binding protein 2                               | NM_012478      | G | A | nonsynonymous SNV | C502T  | P168S  | M16 | T | D | 3.58  |
| 17 | 74394602 | 74394602 | UBE2O     | ubiquitin-conjugating enzyme E2-ubiquitin                 | NM_022066      | G | A | nonsynonymous SNV | C1847T | T616I  | M16 | T | D | 5.42  |
| 17 | 76481017 | 76481017 | DNAH17    | dynein, axonemal, heavy chain 17                          | NM_173628      | C | T | nonsynonymous SNV | G7582A | E2528K | M16 | D |   | 4.96  |
| 18 | 10763085 | 10763085 | PIEZO2    | piezo-type mechanosensitive ion channel                   | NM_022068      | G | T | nonsynonymous SNV | C2883A | R171C  | M16 | T | B | 5.23  |
| 18 | 24497022 | 24497022 | CHST9     | carbohydrate (N-acetyl)galactosyltransferase 9            | NM_031422      | C | T | nonsynonymous SNV | G533A  | R178Q  | M16 | D | D | 6.16  |
| 18 | 31324974 | 31324974 | ASXL3     | additional sex combs like transcriber 3                   | NM_030632      | C | A | nonsynonymous SNV | C5162A | S1721Y | M16 | D | D | 5.86  |
| 18 | 32833686 | 32833686 | ZSCAN30   | zinc finger and SCAN domain 30                            | NM_001166012.2 | T | C | nonsynonymous SNV | A1213G | K405E  | M16 | D | P | 4.19  |
| 18 | 43219847 | 43219847 | SLC14A2   | solute carrier family 14 (urea) 2                         | NM_007163.3    | G | A | nonsynonymous SNV | G980A  | G327E  | M16 | D | B | 4.37  |
| 18 | 70461449 | 70461449 | NETO1     | neuropilin (NRP) and tolloid (TOLL) domain containing 1   | NM_138966      | C | T | nonsynonymous SNV | G542A  | G181E  | M16 | D | D | 5.29  |
| 19 | 10080357 | 10080357 | COL5A3    | collagen, type V, alpha 3                                 | NM_015719      | C | T | nonsynonymous SNV | G3992A | G1331E | M16 | D | D | 3.76  |
| 19 | 12186819 | 12186819 | ZNF844    | zinc finger protein 844                                   | NM_001136501   | C | T | nonsynonymous SNV | C884T  | E652D  | M16 | T | B | -5    |
| 19 | 14992110 | 14992110 | OR7A17    | olfactory receptor, family 7, subfamily A, member 17      | NM_030901      | C | T | nonsynonymous SNV | G58A   | E20K   | M16 | T | B | 1.67  |
| 19 | 15198817 | 15198817 | OR11      | olfactory receptor, family 1, subfamily A, member 11      | NM_001004713   | G | A | nonsynonymous SNV | G941A  | R314K  | M16 | T | B | 0.032 |
| 19 | 20727663 | 20727663 | ZNF737    | zinc finger protein 737                                   | NM_001159293   | C | T | nonsynonymous SNV | G1346A | G449E  | M16 | T | B | 0.801 |
| 19 | 20807247 | 20807247 | ZNF626    | zinc finger protein 626                                   | NM_001076675   | C | A | nonsynonymous SNV | G1436T | R479I  | M16 | D | B | -1.66 |
| 19 | 21366439 | 21366439 | ZNF431    | zinc finger protein 431                                   | NM_133473      | G | T | nonsynonymous SNV | G1333T | A445S  | M16 | T | B | -1.91 |
| 19 | 22942376 | 22942376 | ZNF99     | zinc finger protein 99                                    | NM_001080409   | C | T | nonsynonymous SNV | G335A  | R112Q  | M16 | T | B | -1.87 |
| 19 | 22952066 | 22952066 | ZNF99     | zinc finger protein 99                                    | NM_001080409   | C | T | nonsynonymous SNV | G64A   | D22N   | M16 | T | P | 1.05  |
| 19 | 23927898 | 23927898 | ZNF681    | zinc finger protein 681                                   | NM_138286      | G | A | nonsynonymous SNV | C454T  | H152Y  | M16 | T | B | -2.54 |
| 19 | 3008922  | 3008922  | TLE2      | transducin-like enhancer of scabrous 2                    | NM_001300846.1 | G | A | nonsynonymous SNV | C1198T | H400Y  | M16 | T | D | 2.95  |
| 19 | 30934951 | 30934951 | ZNF536    | zinc finger protein 536                                   | NM_014717      | C | T | nonsynonymous SNV | C482T  | P161L  | M16 | D | D | 4.63  |
| 19 | 31769138 | 31769138 | TSHZ3     | teashirt zinc finger homeobox 3                           | NM_020856      | C | T | nonsynonymous SNV | G1561A | D521N  | M16 | D | P | 4.37  |
| 19 | 35624952 | 35624952 | LGI4      | Leucine-rich repeat LGI family 4                          | NM_139284      | G | A | nonsynonymous SNV | C227T  | P76L   | M16 | D | D | 3.6   |
| 19 | 36387308 | 36387308 | NFKBID    | nuclear factor of kappa light chain gene 1                | NM_139239      | G | A | nonsynonymous SNV | C391T  | P131S  | M16 | T | D | 3.77  |
| 19 | 38230622 | 38230622 | ZNF573    | zinc finger protein 573                                   | NM_152360.3    | G | A | stopgain          | C595T  | Q199X  | M16 | T |   | 1.18  |
| 19 | 38378670 | 38378670 | WDR87     | WD repeat domain 87                                       | NM_001291088.1 | C | T | nonsynonymous SNV | G5641A | E1881K | M16 | T | B | 1.32  |
| 19 | 38379186 | 38379186 | WDR87     | WD repeat domain 87                                       | NM_001291088.1 | C | T | nonsynonymous SNV | G5125A | E1709K | M16 | T | B | 0.025 |
| 19 | 38379719 | 38379719 | WDR87     | WD repeat domain 87                                       | NM_001291088.1 | T | C | nonsynonymous SNV | A4592G | E1531G | M16 | D | P | 1.27  |
| 19 | 3941088  | 3941088  | NMRK2     | nicotinamide riboside kinase 2                            | NM_001289117.1 | C | T | nonsynonymous SNV | C430T  | P144S  | M16 | D | P | 4.03  |
| 19 | 4212663  | 4212663  | ANKRD24   | ankyrin repeat domain 24                                  | NM_133475      | G | A | nonsynonymous SNV | G1165A | E389K  | M16 | D | D | 5.04  |
| 19 | 43093831 | 43093831 | CEACAM8   | carcinoembryonic antigen-related cell adhesion molecule 8 | NM_001816      | C | T | nonsynonymous SNV | G481A  | D161N  | M16 | D | D | 1.52  |
| 19 | 43514178 | 43514178 | PSG11     | pregnancy specific beta-1-glycoprotein 11                 | NM_002785.2    | C | T | nonsynonymous SNV | G980A  | G327E  | M16 | T | D | -2.23 |
| 19 | 43519288 | 43519288 | PSG11     | pregnancy specific beta-1-glycoprotein 11                 | NM_002785.2    | G | A | nonsynonymous SNV | C944T  | S315F  | M16 | T | P | -1.95 |
| 19 | 43762564 | 43762564 | PSG9      | pregnancy specific beta-1-glycoprotein 9                  | NM_002784.4    | G | A | nonsynonymous SNV | C1033T | R345C  | M16 | T | D | 1.31  |
| 19 | 43771969 | 43771969 | PSG9      | pregnancy specific beta-1-glycoprotein 9                  | NM_002784.4    | C | T | nonsynonymous SNV | G397A  | E133K  | M16 | T | P | -3.11 |
| 19 | 44680298 | 44680298 | ZNF226    | zinc finger protein 226                                   | NM_001032372.1 | C | T | nonsynonymous SNV | C883T  | L295F  | M16 | D | D | 3.2   |
| 19 | 4512515  | 4512515  | PLIN4     | perilipin 4                                               | NM_001080400   | C | T | nonsynonymous SNV | G1415A | G472D  | M16 | T | B | -10.5 |
| 19 | 4652341  | 4652341  | TNFAIP8L1 | tumor necrosis factor, alpha-inducing protein 8-like 1    | NM_001167942.1 | G | A | nonsynonymous SNV | G460A  | D154N  | M16 | T | P | 4.44  |
| 19 | 50368655 | 50368655 | PNKP      | polynucleotide kinase 3'-phosphatase                      | NM_007254      | G | A | nonsynonymous SNV | C227T  | T76I   | M16 | T | B | 1.08  |
| 19 | 51645918 | 51645918 | SIGLEC7   | sialic acid binding Ig-like lectin 7                      | NM_014385.3    | C | T | nonsynonymous SNV | C292T  | L98F   | M16 | T | P | -1.16 |
| 19 | 52619546 | 52619546 | ZNF616    | zinc finger protein 616                                   | NM_178523      | G | A | nonsynonymous SNV | C871T  | H291Y  | M16 | D | D | 0.954 |



|    |           |           |          |                                  |                |   |   |                   |         |         |     |   |   |        |
|----|-----------|-----------|----------|----------------------------------|----------------|---|---|-------------------|---------|---------|-----|---|---|--------|
| 19 | 52660383  | 52660383  | ZNF836   | zinc finger protein 836          | NM_001102657   | G | A | nonsynonymous SNV | C553T   | P185S   | M16 | T | D | -2.59  |
| 19 | 54803106  | 54803106  | LILRA3   | leukocyte immunoglobulin-like    | NM_006865.4    | G | A | nonsynonymous SNV | C571T   | R191C   | M16 | T | B | -0.191 |
| 19 | 55994548  | 55994548  | ZNF628   | zinc finger protein 628          | NM_033113      | C | T | nonsynonymous SNV | C1988T  | P663L   | M16 | T | B | 0.908  |
| 19 | 56241280  | 56241280  | NLRP9    | NLR family, pyrin domain con     | NM_176820      | C | T | nonsynonymous SNV | G1911A  | M637I   | M16 | T | B | 1.22   |
| 19 | 56423937  | 56423937  | NLRP13   | NLR family, pyrin domain con     | NM_176810      | C | T | nonsynonymous SNV | G1246A  | E416K   | M16 | T | D | 2.7    |
| 19 | 56466958  | 56466958  | NLRP8    | NLR family, pyrin domain con     | NM_176811      | G | A | nonsynonymous SNV | G1534A  | E512K   | M16 | D | D | 2      |
| 19 | 56569723  | 56569723  | NLRP5    | NLR family, pyrin domain con     | NM_153447      | G | A | nonsynonymous SNV | G3417A  | M1139I  | M16 | T | B | -0.238 |
| 19 | 56895705  | 56895705  | ZNF582   | zinc finger protein 582          | NM_144690      | G | A | nonsynonymous SNV | C1081T  | H361Y   | M16 | D | D | 4.49   |
| 19 | 57327898  | 57327898  | PEG3     | paternally expressed 3           | NM_006210.2    | G | A | nonsynonymous SNV | C1912T  | H638Y   | M16 | T | D | 3.07   |
| 19 | 5790155   | 5790155   | DUS3L    | dihydrouridine synthase 3-like   | NM_020175      | A | G | nonsynonymous SNV | T290C   | L97P    | M16 | T | B | -7.82  |
| 19 | 58639694  | 58639694  | ZNF329   | zinc finger protein 329          | NM_024620      | G | A | nonsynonymous SNV | C1177T  | H393Y   | M16 | D | D | 4.31   |
| 19 | 8212238   | 8212238   | FBN3     | fibrillin 3                      | NM_032447      | C | T | nonsynonymous SNV | G127A   | G43R    | M16 | T | P | 3.41   |
| 19 | 9048512   | 9048512   | MUC16    | mucin 16, cell surface associ    | NM_024690      | C | T | nonsynonymous SNV | G33119A | G11040E | M16 | D | B | -5.35  |
| 19 | 9066247   | 9066247   | MUC16    | mucin 16, cell surface associ    | NM_024690      | G | A | nonsynonymous SNV | C21199T | P7067S  | M16 | D | B | -1.44  |
| 19 | 9074082   | 9074082   | MUC16    | mucin 16, cell surface associ    | NM_024690      | G | A | nonsynonymous SNV | C13364T | S4455F  | M16 | D | D | 2.15   |
| 19 | 9720910   | 9720910   | ZNF561   | zinc finger protein 561          | NM_152289      | G | A | nonsynonymous SNV | C1427T  | P476L   | M16 | D | D | 1.1    |
| 2  | 109964145 | 109964145 | SH3RF3   | SH3 domain containing ring f     | NM_001099289   | C | T | nonsynonymous SNV | C589T   | P197S   | M16 | D | P | 3.06   |
| 2  | 111399737 | 111399737 | BUB1     | BUB1 mitotic checkpoint seri     | NM_004336.4    | C | T | nonsynonymous SNV | G2422A  | D808N   | M16 | T | B | 4.32   |
| 2  | 112615888 | 112615888 | ANAPC1   | anaphase promoting complex       | NM_022662      | C | G | nonsynonymous SNV | G1353C  | Q451H   | M16 | T | B | 3.2    |
| 2  | 116485465 | 116485465 | DPP10    | dipeptidyl-peptidase 10          | NM_001178034.1 | G | A | nonsynonymous SNV | G662A   | G221E   | M16 | D | D | 5.46   |
| 2  | 120194981 | 120194981 | TMEM37   | transmembrane protein 37         | NM_183240      | C | T | nonsynonymous SNV | C538T   | L180F   | M16 | T | D | 4.84   |
| 2  | 1204906   | 1204906   | SNTG2    | syntrophin, gamma 2              | NM_018968      | G | A | nonsynonymous SNV | G709A   | E237K   | M16 | T | B | 3.14   |
| 2  | 121746527 | 121746527 | GLI2     | GLI family zinc finger 2         | NM_005270      | C | T | nonsynonymous SNV | C3037T  | P1013S  | M16 | T | B | -2.6   |
| 2  | 121746528 | 121746528 | GLI2     | GLI family zinc finger 2         | NM_005270      | C | T | nonsynonymous SNV | C3038T  | P1013L  | M16 | T | B | 0.584  |
| 2  | 130939113 | 130939113 | SMPD4    | sphingomyelin phosphodieste      | NM_017951.4    | C | T | stopgain          | G62A    | W21X    | M16 | T |   | -1.5   |
| 2  | 149857253 | 149857253 | KIF5C    | kinesin family member 5C         | NM_004522      | G | A | nonsynonymous SNV | G2330A  | R777K   | M16 |   | B | 5.01   |
| 2  | 153616337 | 153616337 | ARL6IP6  | ADP-ribosylation factor-like     | NM_152522      | G | T | nonsynonymous SNV | G664T   | A222S   | M16 | D | P | 5.4    |
| 2  | 166848243 | 166848243 | SCN1A    | sodium channel, voltage gate     | NM_001165963.1 | G | A | stopgain          | C5542T  | Q1848X  | M16 | T |   | 5.6    |
| 2  | 167108394 | 167108394 | SCN9A    | sodium channel, voltage gate     | NM_002977      | C | T | nonsynonymous SNV | G3320A  | R1107K  | M16 | T | B | 3.03   |
| 2  | 167262362 | 167262362 | SCN7A    | sodium channel, voltage gate     | NM_002976      | G | T | nonsynonymous SNV | G4777A  | E1593K  | M16 | D | P | 4.51   |
| 2  | 167297944 | 167297944 | SCN7A    | sodium channel, voltage gate     | NM_002976      | C | A | nonsynonymous SNV | C2119T  | P707S   | M16 | T | B | -3.9   |
| 2  | 168099701 | 168099701 | XIRP2    | xin actin binding repeat conta   | NM_152381.5    | C | T | nonsynonymous SNV | C1799T  | S600F   | M16 | D | P | 3.53   |
| 2  | 173352338 | 173352338 | ITGA6    | integrin, alpha 6                | NM_001079818.1 | C | T | nonsynonymous SNV | C2224T  | P742S   | M16 | D | D | 5.61   |
| 2  | 179594516 | 179594516 | TTN      | titin                            | NM_001267550   | G | A | nonsynonymous SNV | C18464T | S6155F  | M16 | D | P | 6.17   |
| 2  | 1921109   | 1921109   | MYT1L    | myelin transcription factor 1-li | NM_015025      | G | A | nonsynonymous SNV | C1480T  | P494S   | M16 | T | B | 5.73   |
| 2  | 197183279 | 197183279 | HECW2    | HECT, C2 and WW domain c         | NM_020760      | C | A | stopgain          | G2335T  | G779X   | M16 | T |   | 4.91   |
| 2  | 198949979 | 198949979 | PLCL1    | phospholipase C-like 1           | NM_006226      | C | T | stopgain          | C1738T  | R580X   | M16 |   |   | 1.91   |
| 2  | 207424736 | 207424736 | ADAM23   | ADAM metalloproteinase dom       | NM_003812      | G | A | nonsynonymous SNV | G1063A  | E355K   | M16 | T | B | 5.64   |
| 2  | 212652869 | 212652869 | ERBB4    | erb-b2 receptor tyrosine kinas   | NM_005235.2    | C | T | nonsynonymous SNV | G437A   | G146E   | M16 | D | D | 5.32   |
| 2  | 227954610 | 227954610 | COL4A4   | collagen, type IV, alpha 4       | NM_000092      | C | T | nonsynonymous SNV | G1433A  | G478E   | M16 | D | B | 4.86   |
| 2  | 234590724 | 234590724 | UGT1A7   | UDP glucuronosyltransferase      | NM_019077      | A | T | nonsynonymous SNV | A141T   | K47N    | M16 | D | P | -3.81  |
| 2  | 234638421 | 234638421 | UGT1A3   | UDP glucuronosyltransferase      | NM_019093      | C | T | nonsynonymous SNV | C649T   | P217S   | M16 | T | P | 3.2    |
| 2  | 27276296  | 27276296  | AGBL5    | ATP/GTP binding protein-like     | NM_021831.5    | G | A | nonsynonymous SNV | G242A   | G81E    | M16 | D | D | 5.67   |
| 2  | 27447242  | 27447242  | CAD      | carbamoyl-phosphate synthe       | NM_004341      | C | G | nonsynonymous SNV | C1138G  | P380A   | M16 | T | B | 3.08   |
| 2  | 27447243  | 27447243  | CAD      | carbamoyl-phosphate synthe       | NM_004341      | C | T | nonsynonymous SNV | C1139T  | P380L   | M16 | T | B | 3.21   |
| 2  | 27479365  | 27479365  | SLC30A3  | solute carrier family 30 (zinc   | NM_003459      | G | T | nonsynonymous SNV | G907A   | E303K   | M16 | T | B | 5.24   |
| 2  | 27552354  | 27552354  | GTF3C2   | general transcription factor III | NM_001521.3    | C | A | nonsynonymous SNV | C1769T  | P590L   | M16 | T | B | 4.78   |
| 2  | 36706651  | 36706651  | CRIM1    | cysteine rich transmembrane      | NM_016441      | C | T | nonsynonymous SNV | C1186T  | P396S   | M16 | T | P | 5.34   |
| 2  | 39178194  | 39178194  | ARHGEF33 | Rho guanine nucleotide exch      | NM_001145451   | G | A | nonsynonymous SNV | G985A   | E329K   | M16 | T | P | 4.74   |
| 2  | 80874881  | 80874881  | CTNNA2   | catenin (cadherin-associated     | NM_001282597.2 | C | T | nonsynonymous SNV | C2746T  | L916F   | M16 |   | D | 4.89   |
| 2  | 87042840  | 87042840  | CD8B     | CD8b molecule                    | NM_172213.3    | G | A | nonsynonymous SNV | C622T   | P208S   | M16 | D | B | 1.5    |
| 2  | 9474874   | 9474874   | ASAP2    | ArfGAP with SH3 domain, an       | NM_003887.2    | C | T | stopgain          | C694T   | Q232X   | M16 | T |   | 5.12   |
| 2  | 99013185  | 99013185  | CNGA3    | cyclic nucleotide gated chann    | NM_001298.2    | G | A | nonsynonymous SNV | G1552A  | E518K   | M16 | T | D | 4.87   |
| 20 | 14307771  | 14307771  | FLRT3    | fibronectin leucine rich trans   | NM_198391.2    | G | A | nonsynonymous SNV | C382T   | P128S   | M16 | T | B | 6.06   |
| 20 | 1459144   | 1459144   | SIRPB2   | signal-regulatory protein beta   | NM_001122962.1 | G | A | nonsynonymous SNV | C560T   | P187L   | M16 | D | D | 4.05   |
| 20 | 1616878   | 1616878   | SIRPG    | signal-regulatory protein gam    | NM_018556.3    | C | T | nonsynonymous SNV | G704A   | G235E   | M16 | T | B | 0.764  |
| 20 | 19665971  | 19665971  | SLC24A3  | solute carrier family 24 (sodi   | NM_020689      | T | G | nonsynonymous SNV | T1290G  | D430E   | M16 |   | B | -4.89  |
| 20 | 32345053  | 32345053  | ZNF341   | zinc finger protein 341          | NM_001282933.1 | C | T | nonsynonymous SNV | C841T   | P281S   | M16 | T | D | 5.87   |
| 20 | 32345054  | 32345054  | ZNF341   | zinc finger protein 341          | NM_001282933.1 | C | T | nonsynonymous SNV | C842T   | P281L   | M16 | D | D | 5.87   |
| 20 | 33503040  | 33503040  | ACSS2    | acyl-CoA synthetase short-ch     | NM_001076552   | C | T | nonsynonymous SNV | C854T   | S285F   | M16 | T | B | 4.71   |
| 20 | 3649620   | 3649620   | ADAM33   | ADAM metalloproteinase dom       | NM_025220.3    | C | A | nonsynonymous SNV | G2432T  | C811F   | M16 | T | B | -1.84  |
| 20 | 37195804  | 37195804  | RALGAPB  | Ral GTPase activating protei     | NM_020336.3    | C | A | nonsynonymous SNV | A3883T  | I1295F  | M16 | T | B | 5.42   |
| 20 | 3891387   | 3891387   | PANK2    | pantothenate kinase 2            | NM_153640.2    | C | T | nonsynonymous SNV | C272T   | P91L    | M16 | T | B | 4.48   |
| 20 | 40827885  | 40827885  | PTPRT    | protein tyrosine phosphatase     | NM_133170.3    | C | T | nonsynonymous SNV | G2543A  | G848E   | M16 | D | D | 5.73   |
| 20 | 43739287  | 43739287  | WFDC5    | WAP four-disulfide core dom      | NM_145652      | G | A | nonsynonymous SNV | C215T   | P72L    | M16 | T | D | -0.708 |
| 20 | 44678295  | 44678295  | SLC12A5  | solute carrier family 12 (potas  | NM_001134771.1 | G | A | nonsynonymous SNV | G2116A  | D706N   | M16 | T | B | 4.35   |
| 20 | 52790066  | 52790066  | CYP24A1  | cytochrome P450, family 24,      | NM_000782.4    | A | C | nonsynonymous SNV | T53G    | L18R    | M16 | D | B | 4.16   |

|    |           |           |          |                                 |                |   |   |                   |         |        |     |   |   |        |
|----|-----------|-----------|----------|---------------------------------|----------------|---|---|-------------------|---------|--------|-----|---|---|--------|
| 20 | 57564976  | 57564976  | NELFCD   | negative elongation factor coi  | NM_198976      | C | T | stopgain          | C775T   | Q259X  | M16 | T |   | 5.74   |
| 20 | 57568570  | 57568570  | NELFCD   | negative elongation factor coi  | NM_198976      | G | A | nonsynonymous SNV | G1465A  | E489K  | M16 | T | B | 5.32   |
| 20 | 62168628  | 62168628  | PTK6     | protein tyrosine kinase 6       | NM_005975.3    | C | A | nonsynonymous SNV | G40T    | V14L   | M16 | D | B | 1.43   |
| 20 | 9402007   | 9402007   | PLCB4    | phospholipase C, beta 4         | NM_001172646.1 | G | A | nonsynonymous SNV | G2218A  | G740R  | M16 | D | D | 5.68   |
| 20 | 9546620   | 9546620   | PAK7     | p21 protein (Cdc42/Rac)-acti    | NM_020341.3    | C | T | nonsynonymous SNV | G1402A  | E468K  | M16 |   | D | 5.5    |
| 20 | 9560902   | 9560902   | PAK7     | p21 protein (Cdc42/Rac)-acti    | NM_020341.3    | C | T | nonsynonymous SNV | G880A   | E294K  | M16 |   | P | 5.6    |
| 21 | 10908835  | 10908835  | TPTE     | transmembrane phosphatase       | NM_199261.3    | C | T | nonsynonymous SNV | G1510A  | E504K  | M16 | T | B | -4.36  |
| 21 | 41033288  | 41033288  | B3GALT5  | UDP-Gal:betaGlcNAc beta 1,      | NM_006057.2    | C | T | nonsynonymous SNV | C802T   | P268S  | M16 | T | P | 5.64   |
| 21 | 45815319  | 45815319  | TRPM2    | transient receptor potential c  | NM_003307      | C | T | nonsynonymous SNV | C1817T  | S606F  | M16 | T | D | 4.32   |
| 21 | 47359951  | 47359951  | PCBP3    | poly(rC) binding protein 3      | NM_020528.2    | G | T | nonsynonymous SNV | G917T   | G306V  | M16 | D | D | 4.19   |
| 21 | 47965801  | 47965801  | DIP2A    | disco-interacting protein 2 ho  | NM_015151.3    | C | T | nonsynonymous SNV | C2321T  | P774L  | M16 | T | B | 4.84   |
| 22 | 18138598  | 18138598  | BCL2L13  | BCL2-like 13 (apoptosis facili  | NM_015367.3    | G | A | nonsynonymous SNV | G121A   | G41R   | M16 | T | D | 5.68   |
| 22 | 19969479  | 19969479  | ARVCF    | armadillo repeat gene delet     | NM_001670      | T | A | nonsynonymous SNV | A346T   | T116S  | M16 |   | D | 3.45   |
| 22 | 21987504  | 21987504  | CCDC116  | coiled-coil domain containin    | NM_152612      | G | T | nonsynonymous SNV | G34T    | A12S   | M16 | D | D | 4.03   |
| 22 | 26165178  | 26165178  | MYO18B   | myosin XVIIIIB                  | NM_032608      | C | T | nonsynonymous SNV | C1295T  | P432L  | M16 | D | B | 2.59   |
| 22 | 29650193  | 29650193  | EMID1    | EMI domain containing 1         | NM_133455.3    | G | A | nonsynonymous SNV | G1121A  | G374E  | M16 | D | B | 4.93   |
| 22 | 29687573  | 29687573  | EWSR1    | EWS RNA-binding protein 1       | NM_013986.3    | T | C | nonsynonymous SNV | T1012C  | F338L  | M16 | D | D | 5.78   |
| 22 | 30770056  | 30770056  | CCDC157  | coiled-coil domain containin    | NM_001017437   | A | T | nonsynonymous SNV | A1648T  | R550W  | M16 | D | B | -3.61  |
| 22 | 30890857  | 30890857  | SEC14L4  | SEC14-like lipid binding 4      | NM_174977.3    | T | A | nonsynonymous SNV | A515T   | Q172L  | M16 | T | B | 5.11   |
| 22 | 32756350  | 32756350  | RFPL3    | ret finger protein-like 3       | NM_001098535.1 | G | A | nonsynonymous SNV | G485A   | R162K  | M16 | D | D | 0.664  |
| 22 | 34046465  | 34046465  | LARGE    | like-glycosyltransferase        | NM_004737.4    | G | A | nonsynonymous SNV | C296T   | S99F   | M16 | T | B | 4.57   |
| 22 | 40661348  | 40661348  | TNRC6B   | trinucleotide repeat containi   | NM_001162501.1 | G | A | nonsynonymous SNV | G1114A  | G372R  | M16 | D | P | 5.07   |
| 22 | 45931198  | 45931198  | FBLN1    | fibulin 1                       | NM_006486.2    | T | G | nonsynonymous SNV | T903G   | D301E  | M16 | T | P | 3.22   |
| 22 | 50297497  | 50297497  | ALG12    | ALG12, alpha-1,6-mannosyltr     | NM_024105      | G | A | nonsynonymous SNV | C1456T  | R486W  | M16 | D | B | -10.6  |
| 3  | 111997609 | 111997609 | SLC9C1   | solute carrier family 9, subfan | NM_183061      | C | T | nonsynonymous SNV | G285A   | M95I   | M16 | T | B | 3.31   |
| 3  | 112644023 | 112644023 | CD200R1  | CD200 receptor 1                | NM_138806.3    | A | C | nonsynonymous SNV | T787G   | M95I   | M16 | T | B | -8.32  |
| 3  | 122404136 | 122404136 | PARP14   | poly (ADP-ribose) polymerasi    | NM_017554      | C | T | nonsynonymous SNV | C292T   | H98Y   | M16 | D | B | 0.867  |
| 3  | 132047168 | 132047168 | ACPP     | acid phosphatase, prostate      | NM_001099.4    | G | A | nonsynonymous SNV | G178A   | E60K   | M16 | D | D | 5.72   |
| 3  | 134078254 | 134078254 | AMOTL2   | angiominin like 2               | NM_001278683.1 | G | A | stopgain          | C2149T  | Q717X  | M16 | T |   | 5.54   |
| 3  | 138724404 | 138724404 | PRR23A   | proline rich 23A                | NM_000134659   | G | A | nonsynonymous SNV | C707T   | P236L  | M16 | D | D | 3.23   |
| 3  | 148923998 | 148923998 | CP       | ceruloplasmin (ferroxidase)     | NM_000096      | C | T | nonsynonymous SNV | G1165A  | G389S  | M16 | T | P | 5.81   |
| 3  | 150416580 | 150416580 | ERICH6   | glutamate-rich 6                | NM_152394      | G | A | nonsynonymous SNV | C551T   | S184L  | M16 | T | B | -7.46  |
| 3  | 155314127 | 155314127 | PLCH1    | phospholipase C, eta 1          | NM_001130960.1 | C | T | nonsynonymous SNV | G84A    | M28I   | M16 | D | P | 5.42   |
| 3  | 167512485 | 167512485 | SERPINI1 | serpin peptidase inhibitor, cla | NM_005025.4    | A | G | nonsynonymous SNV | A754G   | S252G  | M16 | D | P | 4.53   |
| 3  | 169639114 | 169639114 | SAMD7    | sterile alpha motif domain cor  | NM_182610      | C | T | nonsynonymous SNV | C199T   | R67W   | M16 | D | P | 3.53   |
| 3  | 170244494 | 170244494 | SLC7A14  | solute carrier family 7, membi  | NM_020949      | C | T | nonsynonymous SNV | G232A   | V78M   | M16 | D | D | 4.71   |
| 3  | 172224307 | 172224307 | TNFSF10  | tumor necrosis factor (ligand)  | NM_003810      | A | T | nonsynonymous SNV | T821A   | F274Y  | M16 | T | B | -0.206 |
| 3  | 175345091 | 175345091 | NAALADL2 | N-acetylated alpha-linked aci   | NM_027015      | C | T | nonsynonymous SNV | C1813T  | L605F  | M16 | T | D | 5.35   |
| 3  | 186459696 | 186459696 | KNG1     | kininogen 1                     | NM_001102416.2 | G | A | nonsynonymous SNV | G1511A  | G504E  | M16 |   | B | -1.9   |
| 3  | 195516064 | 195516064 | MUC4     | mucin 4, cell surface associat  | NM_018406      | C | T | nonsynonymous SNV | G2387A  | R796Q  | M16 | T | B | -3.42  |
| 3  | 33907878  | 33907878  | PDCD6IP  | programmed cell death 6 inte    | NM_001162429.2 | C | A | nonsynonymous SNV | C2483A  | P828H  | M16 | D | D | 5.37   |
| 3  | 38835477  | 38835477  | SCN10A   | sodium channel, voltage gate    | NM_006514.3    | C | T | nonsynonymous SNV | G25A    | E9K    | M16 | D | B | -1.65  |
| 3  | 38936362  | 38936362  | SCN11A   | sodium channel, voltage gate    | NM_014139.2    | G | A | stopgain          | C2497T  | Q833X  | M16 | D |   | 5.38   |
| 3  | 38946740  | 38946740  | SCN11A   | sodium channel, voltage gate    | NM_014139.2    | G | A | nonsynonymous SNV | C1546T  | P516S  | M16 | D | B | 1.78   |
| 3  | 42732364  | 42732364  | KLHL40   | kelch-like family member 40     | NM_152393      | G | A | nonsynonymous SNV | G1621A  | E541K  | M16 | T | B | 1.74   |
| 3  | 49699177  | 49699177  | BSN      | bassoon presynaptic cytomat     | NM_003458      | G | A | nonsynonymous SNV | G9899A  | G3300E | M16 | T | D | 5.33   |
| 3  | 49936108  | 49936108  | MST1R    | macrophage stimulating 1 rec    | NM_002447.2    | G | A | nonsynonymous SNV | C1562T  | P521L  | M16 | D | D | 4.95   |
| 3  | 51393628  | 51393628  | DOCK3    | dedicator of cytokinesis 3      | NM_004947      | A | G | nonsynonymous SNV | A4358G  | K1453R | M16 | T | B | 4.2    |
| 3  | 52417889  | 52417889  | DNAH1    | dynein, axonemal, heavy cha     | NM_015512      | G | A | nonsynonymous SNV | G8164A  | V272I  | M16 | T | B | 3.32   |
| 3  | 52518642  | 52518642  | NISCH    | nischarin                       | NM_007184      | C | T | nonsynonymous SNV | C1642T  | P548S  | M16 | T | B | 5.71   |
| 3  | 53381542  | 53381542  | DCP1A    | Decapping mRNA 1A               | NM_018403      | C | T | nonsynonymous SNV | G3A     | M1I    | M16 |   |   |        |
| 3  | 74420367  | 74420367  | CNTN3    | Contactin 3 (plasmacytoma a     | NM_020872      | G | A | nonsynonymous SNV | C638T   | P213L  | M16 | T | D | 5.81   |
| 3  | 74420368  | 74420368  | CNTN3    | Contactin 3 (plasmacytoma a     | NM_020872      | G | A | nonsynonymous SNV | C637T   | P213S  | M16 | T | B | 5.81   |
| 3  | 97887693  | 97887693  | OR5H15   | Olfactory receptor, family 5, s | NM_001005515   | G | A | stopgain          | G150A   | W50X   | M16 | T |   | 1.58   |
| 3  | 98110187  | 98110187  | OR5K3    | Olfactory receptor, family 5, s | NM_001005516   | G | A | nonsynonymous SNV | G678A   | M226I  | M16 | T | B | 3.22   |
| 4  | 113352162 | 113352162 | ALPK1    | Alpha-kinase 1                  | NM_025144      | G | A | nonsynonymous SNV | G1459A  | G487R  | M16 | D | B | 4.64   |
| 4  | 121957787 | 121957787 | NDNF     | Neuron-derived neurotrophic     | NM_024574      | G | A | nonsynonymous SNV | C1339T  | L447F  | M16 | T | D | 4.08   |
| 4  | 126402868 | 126402868 | FAT4     | FAT atypical cadherin 4         | NM_001291285   | A | C | nonsynonymous SNV | A12797C | E4266A | M16 | T | D | 4.91   |
| 4  | 1345574   | 1345574   | UVSSA    | UV-stimulated scaffold protei   | NM_020894      | G | C | nonsynonymous SNV | G501C   | L167F  | M16 | T | D | 3.08   |
| 4  | 135121676 | 135121676 | PABPC4L  | Poly(A) binding protein, cytop  | NM_001114734   | C | T | nonsynonymous SNV | G673A   | V225M  | M16 |   |   |        |
| 4  | 13603320  | 13603320  | BOD1L1   | Biorientation of chromosomes    | NM_148894      | C | T | nonsynonymous SNV | G5204A  | R1735K | M16 | T | B | 4.81   |
| 4  | 145573860 | 145573860 | HHIP     | Hedgehog interacting protein    | NM_022475      | G | A | nonsynonymous SNV | G383A   | R128K  | M16 | T | B | 1.17   |
| 4  | 147830214 | 147830214 | TTC29    | Tetratricopeptide repeat dom    | NM_001300761   | G | A | nonsynonymous SNV | C442T   | H148Y  | M16 | T | B | -0.287 |
| 4  | 154702631 | 154702631 | SFRP2    | Secreted frizzled-related prot  | NM_003013      | G | A | nonsynonymous SNV | C860T   | S287F  | M16 | T | B | 5.95   |
| 4  | 156632263 | 156632263 | GUCY1A3  | Guanylate cyclase 1, soluble,   | NM_000856      | G | A | nonsynonymous SNV | G946A   | G316R  | M16 | T | B | 5.76   |
| 4  | 15720535  | 15720535  | BST1     | Bone marrow stromal cell ant    | NM_004334      | C | T | nonsynonymous SNV | C710T   | S237F  | M16 | D | D | 4.75   |
| 4  | 165118773 | 165118773 | ANP32C   | Acidic (leucine-rich) nuclear   | NM_012403      | C | T | nonsynonymous SNV | G91A    | E31K   | M16 |   |   |        |

|   |           |           |          |                                  |                         |   |   |                   |               |              |     |   |   |        |
|---|-----------|-----------|----------|----------------------------------|-------------------------|---|---|-------------------|---------------|--------------|-----|---|---|--------|
| 4 | 166916323 | 166916323 | TLL1     | Tolloid-like 1                   | NM 012464               | C | T | nonsynonymous SNV | C625T         | P209S        | M16 | T | D | 5.83   |
| 4 | 166916324 | 166916324 | TLL1     | Tolloid-like 1                   | NM 012464               | C | T | nonsynonymous SNV | C626T         | P209L        | M16 | D | D | 5.83   |
| 4 | 167921594 | 167921594 | SPOCK3   | Sparc/osteonectin, cwcv and      | NM 016950               | G | A | nonsynonymous SNV | C265T         | P89S         | M16 | T | D | 5.4    |
| 4 | 175636678 | 175636678 | GLRA3    | Glycine receptor, alpha 3        | NM 006529               | G | A | nonsynonymous SNV | C535T         | P179S        | M16 | D | D | 5.49   |
| 4 | 175899129 | 175899129 | ADAM29   | ADAM metalloproteinase dom       | NM 001278125            | C | T | nonsynonymous SNV | C2453T        | T818M        | M16 | T | P | -0.888 |
| 4 | 186112121 | 186112121 | CFAP97   | Cilia and flagella associated f  | NM 020827               | G | A | nonsynonymous SNV | C230T         | P77L         | M16 | T | B | -3.29  |
| 4 | 187130333 | 187130333 | CYP4V2   | Cytochrome P450, family 4, s     | NM 207352               | G | A | nonsynonymous SNV | G1312A        | E438K        | M16 | T | B | 5.39   |
| 4 | 187149402 | 187149402 | KLKB1    | Kallikrein B, plasma (Fletcher   | NM 000892               | C | T | nonsynonymous SNV | C53T          | S18F         | M16 | D | B | 4.39   |
| 4 | 188924697 | 188924697 | ZFP42    | Zinc finger protein 42           | NM 174900               | C | T | nonsynonymous SNV | C736T         | R246W        | M16 | D | P | 4.39   |
| 4 | 265061    | 265061    | ZNF732   | Zinc finger protein 732          | NM 001137608            | G | A | nonsynonymous SNV | C1582T        | P528S        | M16 | D | B | 0.977  |
| 4 | 265062    | 265062    | ZNF732   | Zinc finger protein 732          | NM 001137608            | T | A | nonsynonymous SNV | A1581T        | K527N        | M16 | D | P | 0.977  |
| 4 | 3225218   | 3225218   | HTT      | Huntingtin                       | NM 002111               | C | T | nonsynonymous SNV | C7556T        | A2519V       | M16 | D | P | 4.88   |
| 4 | 40104742  | 40104742  | N4BP2    | NEDD4 binding protein 2          | NM 018177               | C | T | nonsynonymous SNV | C1277T        | P426L        | M16 | D | B | 5.24   |
| 4 | 4304146   | 4304146   | ZBTB49   | Zinc finger and BTB domain       | NM 145291               | C | T | nonsynonymous SNV | C583T         | P195S        | M16 | T | B | 0.26   |
| 4 | 55593661  | 55593661  | KIT      | v-kit Hardy-Zuckerman 4 felin    | M 000222                | T | C | nonsynonymous SNV | T1727C        | L576P        | M16 | D | B | 6.06   |
| 4 | 675895    | 675895    | MFSD7    | Major facilitator superfamily d  | NM 032219               | C | A | nonsynonymous SNV | G1532T        | C511F        | M16 | D | B | 0.375  |
| 4 | 69533829  | 69533829  | UGT2B15  | UDP glucuronosyltransferase      | NM 001076               | G | A | nonsynonymous SNV | C802T         | P268S        | M16 | D | D | 1.57   |
| 4 | 70079799  | 70079799  | UGT2B11  | UDP glucuronosyltransferase      | NM 001073               | C | T | nonsynonymous SNV | G642A         | M214I        | M16 | D | B | 1.04   |
| 4 | 70504860  | 70504860  | UGT2A1   | UGT2/UDP glucuronosyltransferase | NM 001252274; NM 006060 | G | A | nonsynonymous SNV | C1102T; C499T | L368F; L167F | M16 | D | D | 2.16   |
| 4 | 70504997  | 70504997  | UGT2A1   | UGT2/UDP glucuronosyltransferase | NM 001252274; NM 006060 | C | T | nonsynonymous SNV | G965A; G362A  | G322E; G121E | M16 | T | B | 5.01   |
| 4 | 70505036  | 70505036  | UGT2A1   | UGT2/UDP glucuronosyltransferase | NM 001252274; NM 006060 | G | A | nonsynonymous SNV | C926T; C323T  | P309L; P108L | M16 | T | D | 5.01   |
| 4 | 71255509  | 71255509  | SMR3B    | submaxillary gland androgen      | NM 006685               | C | T | nonsynonymous SNV | C184T         | P62S         | M16 | D | B | -0.071 |
| 4 | 74277783  | 74277783  | ALB      | Albumin                          | NM 000477               | C | T | nonsynonymous SNV | C784T         | L262F        | M16 | D | D | 3.39   |
| 4 | 79343109  | 79343109  | FRAS1    | Fraser extracellular matrix co   | NM 025074               | C | T | nonsynonymous SNV | C4633T        | P1545S       | M16 | T | B | -11.4  |
| 4 | 8621228   | 8621228   | CPZ      | Carboxypeptidase Z               | NM 003652               | G | A | nonsynonymous SNV | G1810A        | E604K        | M16 | T | B | 0.719  |
| 5 | 1033496   | 1033496   | NKD2     | naked cuticle homolog 2          | NM 033120               | C | T | nonsynonymous SNV | C212T         | P71L         | M16 | D | D | 1.79   |
| 5 | 111504758 | 111504758 | EPB41L4A | Erythrocyte membrane protei      | NM 022140               | C | T | nonsynonymous SNV | G1784A        | R595Q        | M16 | T | D | 5.86   |
| 5 | 122495210 | 122495210 | PRDM6    | PR domain containing 6           | NM 001136239            | C | T | nonsynonymous SNV | C1031T        | S344L        | M16 | D | D | 5.67   |
| 5 | 1334432   | 1334432   | CLPTM1L  | CLPTM1-like                      | NM 030782               | G | A | nonsynonymous SNV | C863T         | A288V        | M16 | T | D | 4.48   |
| 5 | 135692463 | 135692463 | TRPC7    | Transient receptor potential c   | NM 020389               | C | T | nonsynonymous SNV | G613A         | E205K        | M16 | T | D | 5.26   |
| 5 | 13876871  | 13876871  | DNAH5    | Dynein, axonemal, heavy che      | NM 001369               | A | T | stopgain          | T3318A        | Y1106X       | M16 |   |   |        |
| 5 | 140250898 | 140250898 | PCDHA11  | Protocadherin alpha 11           | NM 018902               | C | T | nonsynonymous SNV | C2210T        | T737M        | M16 | T | B | -2.4   |
| 5 | 140474807 | 140474807 | PCDHB2   | Protocadherin beta 2             | NM 018936               | C | T | nonsynonymous SNV | C433T         | P145S        | M16 | T | B | -2.2   |
| 5 | 140476678 | 140476678 | PCDHB2   | Protocadherin beta 2             | NM 018936               | C | G | nonsynonymous SNV | C2304G        | F768L        | M16 | D | B | -1.54  |
| 5 | 140517327 | 140517327 | PCDHB5   | Protocadherin beta 5             | NM 015669               | C | T | nonsynonymous SNV | C2311T        | P771S        | M16 | T | B | 4.61   |
| 5 | 140558735 | 140558735 | PCDHB8   | Protocadherin beta 8             | NM 019120               | C | T | nonsynonymous SNV | C1120T        | L374F        | M16 | D | B | 4.25   |
| 5 | 140731433 | 140731433 | PCDHGB1  | Protocadherin gamma subfar       | NM 018922               | C | T | nonsynonymous SNV | C1606T        | P536S        | M16 | D | D | 4.61   |
| 5 | 140741666 | 140741666 | PCDHGB2  | Protocadherin gamma subfar       | NM 018923               | C | T | nonsynonymous SNV | C1964T        | S655F        | M16 | D | P | 4.95   |
| 5 | 150275261 | 150275261 | ZNF300   | Zinc finger protein 300          | NM 001172831            | T | G | nonsynonymous SNV | A1588C        | I530L        | M16 | D | P | 1.43   |
| 5 | 153029980 | 153029980 | GRIA1    | Glutamate receptor, ionotropi    | NM 000827               | G | A | nonsynonymous SNV | G551A         | G184E        | M16 | T | B | 5.33   |
| 5 | 153795390 | 153795390 | GALNT10  | Polypeptide N-acetylglactos      | NM 198321               | G | T | nonsynonymous SNV | G1551T        | Q517H        | M16 | T | P | 4.72   |
| 5 | 153795391 | 153795391 | GALNT10  | Polypeptide N-acetylglactos      | NM 198321               | C | A | nonsynonymous SNV | C1552A        | H518N        | M16 | T | P | 5.6    |
| 5 | 154330488 | 154330488 | MRPL22   | Mitochondrial ribosomal prote    | NM 014180               | G | C | nonsynonymous SNV | G185C         | R62P         | M16 | T | B | 4.03   |
| 5 | 161528284 | 161528284 | GABRG2   | Gamma-aminobutyric acid (G       | NM 198903               | C | T | nonsynonymous SNV | C592T         | P198S        | M16 | D | D | 5.45   |
| 5 | 162940850 | 162940850 | MAT2B    | Methionine adenosyltransfer      | NM 013283               | G | T | nonsynonymous SNV | G376T         | A126S        | M16 | T | B | 3.55   |
| 5 | 176523307 | 176523307 | FCFR4    | Fibroblast growth factor rece    | NM 002011               | G | A | stopgain          | G1964A        | W655X        | M16 | T |   | 4.65   |
| 5 | 23526683  | 23526683  | PRDM9    | PR domain containing 9           | NM 020227               | G | A | nonsynonymous SNV | G1486A        | E496K        | M16 | T | B | -0.417 |
| 5 | 33881348  | 33881348  | ADAMTS12 | ADAM metalloproteinase with      | NM 030955               | C | T | nonsynonymous SNV | G365A         | R122K        | M16 | T | D | 5.65   |
| 5 | 35691146  | 35691146  | SPEF2    | Sperm flagellar 2                | NM 024867               | T | C | nonsynonymous SNV | T1532C        | V511A        | M16 | T | B | 1.23   |
| 5 | 35800219  | 35800219  | SPEF2    | Sperm flagellar 2                | NM 024867               | A | C | nonsynonymous SNV | A4980C        | Q1660H       | M16 | T | P | 0.529  |
| 5 | 39135031  | 39135031  | FYB      | FYN binding protein              | NM 001243093            | C | T | nonsynonymous SNV | G1631A        | G544E        | M16 | T | D | 5.67   |
| 5 | 40945400  | 40945400  | C7       | Complement component 7           | M 000587                | C | T | nonsynonymous SNV | C668T         | S223F        | M16 | T | B | -5.03  |
| 5 | 40947888  | 40947888  | C7       | Complement component 7           | M 000587                | C | T | nonsynonymous SNV | C923T         | S308L        | M16 | D | D | 5.9    |
| 5 | 40959587  | 40959587  | C7       | Complement component 7           | M 000587                | G | A | stopgain          | G1526A        | W509X        | M16 | T |   | 5.51   |
| 5 | 41032878  | 41032878  | MROH2B   | Maestro heat-like repeat fami    | NM 173489               | G | A | nonsynonymous SNV | C2407T        | R803W        | M16 | D | D | 5.79   |
| 5 | 42718559  | 42718559  | GHR      | Growth hormone receptor          | NM 001242400            | G | A | nonsynonymous SNV | G950A         | G317E        | M16 | D | D | 6.02   |
| 5 | 42799501  | 42799501  | CCDC152  | Coiled-coil domain containi      | NM 001134848            | C | T | stopgain          | C583T         | Q195X        | M16 | D |   | 5.23   |
| 5 | 49706770  | 49706770  | EMB      | Embigin                          | NM 198449               | C | T | nonsynonymous SNV | G413A         | G138E        | M16 | D | D | 4.53   |
| 5 | 64521965  | 64521965  | ADAMTS6  | ADAM metalloproteinase with      | NM 197941               | C | T | nonsynonymous SNV | G2015A        | G672E        | M16 | D | D | 5.2    |
| 5 | 64907539  | 64907539  | TRIM23   | Tripartite motif containing 23   | NM 001656               | G | A | nonsynonymous SNV | C536T         | S179F        | M16 | D | P | 4.23   |
| 5 | 76700605  | 76700605  | PDE8B    | Phosphodiesterase 8B             | NM 003719               | C | T | nonsynonymous SNV | C1271T        | S424L        | M16 | T | B | 3.74   |
| 5 | 79616096  | 79616096  | SPZ1     | Spermatogenic leucine zipper     | NM 032567               | C | T | nonsynonymous SNV | C62T          | P21L         | M16 | D | P | 4.19   |
| 6 | 117665316 | 117665316 | ROS1     | ROS proto-oncogene 1, rec        | NM 002944               | C | T | stopgain          | G4431A        | W1477X       | M16 | T |   | 4.23   |
| 6 | 117709113 | 117709113 | ROS1     | ROS proto-oncogene 1, rec        | NM 002944               | G | A | nonsynonymous SNV | C1844T        | S615F        | M16 | D | B | 2.42   |
| 6 | 145075868 | 145075868 | UTRN     | Utrophin                         | NM 007124               | G | A | nonsynonymous SNV | G8368A        | D2790N       | M16 | D | P | 5.13   |
| 6 | 159029430 | 159029430 | TMEM181  | Transmembrane protein 181        | NM 020823               | C | T | stopgain          | C1150T        | Q384X        | M16 |   | T | 5.21   |
| 6 | 159660971 | 159660971 | FNDC1    | Fibronectin type III domain cc   | NM 032532               | G | A | nonsynonymous SNV | G4603A        | E1535K       | M16 | T | P | 4.18   |

|   |           |           |          |                                 |              |   |   |                   |        |        |     |   |   |        |
|---|-----------|-----------|----------|---------------------------------|--------------|---|---|-------------------|--------|--------|-----|---|---|--------|
| 6 | 170160008 | 170160008 | ERMARD   | ER membrane-associated RN       | NM 018341    | T | C | nonsynonymous SNV | T680C  | L227P  | M16 | T | P | -4.13  |
| 6 | 18236798  | 18236798  | DEK      | DEK proto-oncogene              | NM 003472    | G | A | nonsynonymous SNV | C932T  | P311L  | M16 | T |   | 4.88   |
| 6 | 26046032  | 26046032  | HIST1H3C | Histone cluster 1, H3c          | NM 003531    | C | T | nonsynonymous SNV | C394T  | R132C  | M16 | T |   |        |
| 6 | 27279063  | 27279063  | POM121L2 | POM121 transmembrane nuc        | NM 033482    | G | A | nonsynonymous SNV | C887T  | S296F  | M16 | T | B | 1.24   |
| 6 | 29079681  | 29079681  | OR2J3    | Olfactory receptor, family 2, s | NM 001005216 | G | A | nonsynonymous SNV | G14A   | G5E    | M16 | T | B | 1.23   |
| 6 | 30917741  | 30917741  | DPCR1    | Diffuse panbronchiolitis critic | NM 008070    | A | T | nonsynonymous SNV | A1500T | E500D  | M16 | T | B | -1.08  |
| 6 | 31797607  | 31797607  | HSPA1B   | Heat Shock 70kDa Protein 1E     | NM 005346    | C | T | nonsynonymous SNV | C1880T | P627L  | M16 | D |   | 2.12   |
| 6 | 41197860  | 41197860  | TREML4   | Triggering Receptor Express     | NM 198153    | G | A | nonsynonymous SNV | G506A  | R169K  | M16 | T | B | 3.27   |
| 6 | 46657888  | 46657888  | TDRD6    | tudor domain containing 6       | NM 001010870 | G | A | nonsynonymous SNV | G2023A | E675K  | M16 | T | B | 3.88   |
| 6 | 55659082  | 55659082  | BMP5     | Bone Morphogenetic Protein      | NM 021073    | C | T | nonsynonymous SNV | G827A  | G276E  | M16 | T | B | 5.02   |
| 6 | 55933863  | 55933863  | COL21A1  | Collagen, Type XXI, Alpha 1     | NM 030820    | G | A | nonsynonymous SNV | C2072T | P691L  | M16 | D | D | 4.38   |
| 7 | 100639155 | 100639155 | MUC12    | Mucin 12, Cell Surface Assoc    | NM 001164462 | G | T | nonsynonymous SNV | G5311T | A1771S | M16 | T |   | -0.333 |
| 7 | 100678530 | 100678530 | MUC17    | Mucin 17, Cell Surface Assoc    | NM 001040105 | C | T | nonsynonymous SNV | G5311T | A1771S | M16 | T |   | -0.333 |
| 7 | 103138608 | 103138608 | RELN     | Reelin                          | NM 005045    | A | G | nonsynonymous SNV | T8759C | I2920T | M16 | T | B | 5.89   |
| 7 | 11078450  | 11078450  | PHF14    | PHD Finger Protein 14           | NM 014660    | A | T | nonsynonymous SNV | A2044T | I682L  | M16 | T | B | 4.64   |
| 7 | 116339836 | 116339836 | MET      | MET proto-oncogene, recept      | NM 001127500 | C | T | nonsynonymous SNV | C698T  | S233F  | M16 | D | D | 6.17   |
| 7 | 120385981 | 120385981 | KCN2D    | Potassium Channel, Voltage      | NM 012281    | C | T | nonsynonymous SNV | C1615T | R539C  | M16 |   | B | 6.06   |
| 7 | 123143417 | 123143417 | IQUB     | IQ motif and ubiquitin domain   | NM 001282855 | C | T | nonsynonymous SNV | G533A  | G178E  | M16 | D | D | 5.31   |
| 7 | 12379974  | 12379974  | VWDE     | Von Willebrand Factor D And     | NM 001135924 | C | T | nonsynonymous SNV | G4340A | G1447E | M16 | D | D | 4.73   |
| 7 | 126173484 | 126173484 | GRM8     | Glutamate receptor, metabot     | NM 000845    | C | T | nonsynonymous SNV | G1952A | R651Q  | M16 | T | D | 5.75   |
| 7 | 126882873 | 126882873 | GRM8     | Glutamate receptor, metabot     | NM 000845    | G | A | nonsynonymous SNV | C386T  | S129L  | M16 | D | B | 3.75   |
| 7 | 128588858 | 128588858 | IRF5     | interferon regulatory factor 5  | NM 001098630 | G | T | nonsynonymous SNV | G1483T | A495S  | M16 | T | B | 5.87   |
| 7 | 141840851 | 141840851 | LOC93432 |                                 | NM 001293626 | G | A | nonsynonymous SNV | G1249A | E417K  | M16 | T | B | -4     |
| 7 | 141895967 | 141895967 | LOC93432 |                                 | NM 001293626 | G | A | nonsynonymous SNV | G4360A | V1454M | M16 | T |   | 4.5    |
| 7 | 143054065 | 143054065 | FAM131B  | Family with sequence similar    | NM 001278297 | G | A | stopgain          | C379T  | Q127X  | M16 | D |   | 5.46   |
| 7 | 143807150 | 143807150 | OR2A2    | Olfactory Receptor, Family 2,   | NM 001005480 | G | A | nonsynonymous SNV | G475A  | E159K  | M16 | D | B | -7.21  |
| 7 | 148725416 | 148725416 | PDIA4    | Protein Disulfide Isomerase F   | NM 004911    | C | T | nonsynonymous SNV | G85A   | E29K   | M16 | T | B | 5.58   |
| 7 | 148951472 | 148951472 | ZNF212   | Zinc Finger Protein 212         | NM 012256    | C | T | nonsynonymous SNV | C1454T | A485V  | M16 | D | B | 1.9    |
| 7 | 150164195 | 150164195 | GIMAP8   | GTPase, IMAP Family Memb        | NM 175571    | G | A | nonsynonymous SNV | G409A  | D137N  | M16 | D | D | 4.47   |
| 7 | 29152409  | 29152409  | CPVL     | Carboxypeptidase, vitellogen    | NM 031311    | G | A | nonsynonymous SNV | C199T  | P67S   | M16 | T | B | 0.771  |
| 7 | 35242110  | 35242110  | TBX20    | T-box 20                        | NM 001077653 | G | A | stopgain          | C1276T | Q426X  | M16 | T |   | 5.66   |
| 7 | 39503902  | 39503902  | POU6F2   | POU class 6 homeobox 2          | NM 007252    | G | A | nonsynonymous SNV | G1693  | D565N  | M16 | D | P | 5.35   |
| 7 | 4185524   | 4185524   | SDK1     | Sidekick cell adhesion moleci   | NM 152744    | A | T | nonsynonymous SNV | A4399T | T1467S | M16 | T | B | 4.96   |
| 7 | 47880086  | 47880086  | PKD1L1   | Polycystic kidney disease 1 li  | NM 138295    | C | T | nonsynonymous SNV | G5525A | R1842K | M16 | T | B | 3.66   |
| 7 | 5338638   | 5338638   | SLC29A4  | Solute carrier family 29 (equil | NM 001040661 | T | A | nonsynonymous SNV | T902A  | L301Q  | M16 | T | P | 0.891  |
| 7 | 63726846  | 63726846  | ZNF679   | Zinc finger protein 679         | NM 153363    | G | A | nonsynonymous SNV | C835A  | R279S  | M16 | T | B | 0.81   |
| 7 | 63727156  | 63727156  | ZNF679   | Zinc finger protein 679         | NM 153363    | G | T | nonsynonymous SNV | G1145T | C382F  | M16 | D | P | 0.819  |
| 7 | 6505875   | 6505875   | KDELR2   | KDEL (Lys-Asp-Glu-Leu) end      | NM 006854    | G | A | nonsynonymous SNV | C431T  | A144V  | M16 | T | B | 5.18   |
| 7 | 75131251  | 75131251  | SPDYE5   | Speedy/RINGO cell cycle reg     | NM 001099435 | G | A | nonsynonymous SNV | G1004A | R335H  | M16 |   |   |        |
| 7 | 8167593   | 8167593   | JCA1     | slet cell autoantigen 1, 69kDa  | NM 001136020 | C | T | nonsynonymous SNV | G1240A | E414K  | M16 | T | P | 5.64   |
| 7 | 82579950  | 82579950  | PCLO     | Piccolo presynaptic cytomatri   | NM 033026    | A | T | stopgain          | I4406T | F4802F | M16 |   |   |        |
| 7 | 82585599  | 82585599  | PCLO     | Piccolo presynaptic cytomatri   | NM 033026    | C | T | nonsynonymous SNV | G4670A | R1557Q | M16 | D | D | 5.26   |
| 7 | 86415872  | 86415872  | GRM3     | Glutamate receptor, metabot     | NM 000840    | C | T | nonsynonymous SNV | C764T  | S255F  | M16 | D | D | 6.07   |
| 7 | 87046717  | 87046717  | ABCB4    | ATP-binding cassette, sub-fai   | NM 018849    | G | A | nonsynonymous SNV | C2593T | P865S  | M16 | D | D | 5.82   |
| 7 | 87183115  | 87183115  | ABCB1    | ATP-binding cassette, sub-fai   | NM 000927    | C | T | nonsynonymous SNV | G961A  | V321I  | M16 | T | B | 3.1    |
| 7 | 87537116  | 87537116  | DBF4     | DBF4 zinc finger                | NM 006716    | C | T | nonsynonymous SNV | C1663T | P555S  | M16 | T | B | 2.63   |
| 7 | 878602    | 878602    | SUN1     | Sad1 and UNC84 domain cor       | NM 001130965 | C | T | nonsynonymous SNV | C245T  | S82F   | M16 | D | D | 2.45   |
| 7 | 99956439  | 99956439  | PILRB    | Paired immunoglobulin-like typ  | NM 178238    | T | C | nonsynonymous SNV | T191C  | V64A   | M16 |   | B | -2.11  |
| 8 | 10466281  | 10466281  | RP1L1    | Retinitis pigmentosa 1-like 1   | NM 178857    | G | A | nonsynonymous SNV | C5327T | T1776I | M16 | T | B | -0.077 |
| 8 | 10755826  | 10755826  | XKR6     | XK, Kell blood group complex    | NM 173683    | G | A | nonsynonymous SNV | C1562T | P521L  | M16 | T | D | 5.37   |
| 8 | 108297076 | 108297076 | ANGPT1   | Angiotensinogen 1               | NM 001146    | C | T | nonsynonymous SNV | G1039A | G347S  | M16 | D | D | 5.73   |
| 8 | 113308134 | 113308134 | CSMD3    | CUB and Sushi multiple domi     | NM 198123    | G | A | stopgain          | C8542T | R2848X | M16 | T |   | 4.42   |
| 8 | 121211740 | 121211740 | COL14A1  | Collagen, type XIV, alpha 1     | NM 021110    | C | T | nonsynonymous SNV | C812T  | S271F  | M16 | D | D | 5.54   |
| 8 | 128428248 | 128428248 | POU5F1B  | POU class 5 homeobox 1B         | NM 001159542 | G | A | nonsynonymous SNV | G137A  | G46E   | M16 | T | P | -0.298 |
| 8 | 133044209 | 133044209 | OC90     | Otoconin 90                     | NM 001080399 | G | A | nonsynonymous SNV | C950T  | S317F  | M16 | D | P | 4.98   |
| 8 | 139793190 | 139793190 | COL22A1  | Collagen, type XXII, alpha 1    | NM 152888    | C | T | nonsynonymous SNV | G1630A | D544N  | M16 | T | P | 4.23   |
| 8 | 144942234 | 144942234 | EPPK1    | Epiplakin 1                     | NM 031308    | C | T | nonsynonymous SNV | G5188A | D1730N | M16 | T | D | 4.84   |
| 8 | 145746561 | 145746561 | LRRC14   | Leucine rich repeat containin   | NM 014665    | G | A | nonsynonymous SNV | G1181A | S394N  | M16 | T | B | -0.716 |
| 8 | 15519748  | 15519748  | TUSC3    | Tumor suppressor candidate      | NM 006765    | G | T | nonsynonymous SNV | G651T  | L217F  | M16 | T | D | -0.3   |
| 8 | 27462453  | 27462453  | CLU      | Clusterin                       | NM 001831    | C | T | nonsynonymous SNV | G817A  | E273K  | M16 | T | B | 3.34   |
| 8 | 2820066   | 2820066   | CSMD1    | CUB and Sushi multiple domi     | NM 033225    | G | A | nonsynonymous SNV | C9550T | P3184S | M16 | T | D | 5.6    |
| 8 | 39442835  | 39442835  | ADAM18   | ADAM metalloproteinase dom      | NM 014237    | G | T | nonsynonymous SNV | G96T   | p.K32N | M16 | D | D | 1.92   |
| 8 | 39468085  | 39468085  | ADAM18   | ADAM metalloproteinase dom      | NM 014237    | G | A | nonsynonymous SNV | G382A  | E128K  | M16 | T | D | 4.37   |
| 8 | 52359645  | 52359645  | PXDNL    | Peroxidasin-like                | NM 144651    | C | T | nonsynonymous SNV | G1444A | D482N  | M16 | D | P | 0.972  |
| 8 | 55540830  | 55540830  | RP1      | Retinitis pigmentosa 1          | NM 006269    | C | T | nonsynonymous SNV | C4388T | S1463L | M16 | D | B | 5.48   |
| 8 | 55542620  | 55542620  | RP1      | Retinitis pigmentosa 1          | NM 006269    | G | A | nonsynonymous SNV | G6178A | E2060K | M16 | D | B | 5.48   |
| 8 | 68213506  | 68213506  | ARFGEF1  | ADP-ribosylation factor quani   | NM 006421    | G | A | stopgain          | C265T  | Q89X   | M16 | T |   | 5.28   |

|   |           |           |             |                                |    |           |   |   |                   |        |        |     |   |   |           |
|---|-----------|-----------|-------------|--------------------------------|----|-----------|---|---|-------------------|--------|--------|-----|---|---|-----------|
| 8 | 73850151  | 73850151  | KCNB2       | Potassium channel, voltage c   | NM | 004770    | C | T | nonsynonymous SNV | C2561T | S854F  | M16 | D | P | 5.46      |
| 8 | 73979618  | 73979618  | SBSPON      | Somatostatin B and thombo      | NM | 153225    | G | T | nonsynonymous SNV | C753A  | D251E  | M16 | T | B | -5.2      |
| 8 | 76471138  | 76471138  | HNF4G       | Hepatocyte nuclear factor 4,   | NM | 004133    | G | A | nonsynonymous SNV | G959A  | G320E  | M16 | D | D | 4.73      |
| 8 | 7718170   | 7718170   | SPAG11A     | Sperm associated antigen 11    | NM | 001081552 | G | A | nonsynonymous SNV | G217A  | D73N   | M16 | T | P | 2.28      |
| 8 | 81577195  | 81577195  | ZNF704      | Zinc finger protein 704        | NM | 001033723 | G | A | nonsynonymous SNV | C782T  | S261F  | M16 | D | B | 6.07      |
| 9 | 103108569 | 103108569 | TEX10       | testis expressed 10            | NM | 017746    | C | T | nonsynonymous SNV | G922A  | D308N  | M16 | T | P | 5.15      |
| 9 | 113549986 | 113549986 | MUSK        | muscle, skeletal, receptor tyr | NM | 005592    | C | T | nonsynonymous SNV | C1795T | P599S  | M16 | T | P | 5.18      |
| 9 | 115961176 | 115961176 | FKBP15      | FK506 binding protein 15, 13   | NM | 015258    | T | A | stopgain          | A676T  | K226X  | M16 | T |   | 5.47      |
| 9 | 124536639 | 124536639 | DAB2IP      | DAB2 interacting protein       | NM | 138709    | C | T | nonsynonymous SNV | C2696T | P899L  | M16 | T | B | 4.55      |
| 9 | 125004267 | 125004267 | RBM18       | RNA Binding Motif Protein 18   | NM | 033117    | G | A | nonsynonymous SNV | C469T  | P157S  | M16 | T | P | 5.52      |
| 9 | 125273445 | 125273445 | OR1J2       | Olfactory Receptor, Family 1,  | NM | 054107    | G | A | nonsynonymous SNV | G365A  | R122Q  | M16 | D | D | 3.11      |
| 9 | 125512491 | 125512491 | OR1L6       | Olfactory Receptor, Family 1,  | NM | 001004453 | A | C | nonsynonymous SNV | A365C  | D122A  | M16 | D | D | 4.62      |
| 9 | 131513474 | 131513474 | ZER1        | Zyg-11 Related, Cell Cycle R   | NM | 006336    | G | A | nonsynonymous SNV | C1112T | T371I  | M16 | T | B | 5.01      |
| 9 | 131721120 | 131721120 | NUP188      | Nucleoporin 188kDa             | NM | 015354    | C | T | nonsynonymous SNV | C412T  | R138C  | M16 | D | D | 5.41      |
| 9 | 136656942 | 136656942 | VAV2        | Vav 2 guanine nucleotide exc   | NM | 001134398 | C | T | nonsynonymous SNV | G1151A | R384K  | M16 | T | B | 2.86      |
| 9 | 139996098 | 139996098 | MAN1B1      | Mannosidase, Alpha, Class 1    | NM | 016219    | C | T | nonsynonymous SNV | C1228T | R410C  | M16 |   | D | 3.91      |
| 9 | 140099559 | 140099559 | TMEM203     | Transmembrane Protein 203      | NM | 053045    | T | C | nonsynonymous SNV | A308G  | Q103R  | M16 | T | B | 3.16      |
| 9 | 141012486 | 141012486 | CACNA1B     | Calcium channel, voltage-dep   | NM | 000718    | G | A | nonsynonymous SNV | G5866A | E1956K | M16 | T | B | 4.26      |
| 9 | 32630987  | 32630987  | TAF1L       | TAF1 RNA Polymerase II, TA     | NM | 153809    | C | T | nonsynonymous SNV | G4591A | D1531N | M16 | T | P | 0.489     |
| 9 | 34990697  | 34990697  | DNAJB5      | DnaJ (Hsp40) homolog, subf     | NM | 001135004 | C | T | nonsynonymous SNV | C196T  | R66W   | M16 | D | B | 4.59      |
| 9 | 84607864  | 84607864  | SPATA31D1   | SPATA31 subfamily D, memb      | NM | 001001670 | G | A | nonsynonymous SNV | G2479A | E827K  | M16 | T | P | -0.228    |
| 9 | 893957    | 893957    | DMRT1       | doublesex and mab-3 related    | NM | 021951    | G | A | nonsynonymous SNV | G584A  | G195E  | M16 | T | D | 5.92      |
| 9 | 90296377  | 90296377  | DPK1        | Death-associated protein kin   | NM | 004938    | G | T | nonsynonymous SNV | G2060T | R687I  | M16 | D | D | 3.34      |
| 9 | 90745700  | 90745700  | SPATA31C2   | SPATA31 subfamily C, memb      | NM | 001166137 | G | A | nonsynonymous SNV | C2252T | S751L  | M16 |   |   |           |
| 9 | 90746796  | 90746796  | SPATA31C2   | SPATA31 subfamily C, memb      | NM | 001166137 | C | T | nonsynonymous SNV | G1156A | V386M  | M16 |   |   |           |
| 9 | 96097714  | 96097714  | C9orf129    | Chromosome 9 open reading      | NM | 001098808 | G | A | nonsynonymous SNV | C307T  | P103S  | M16 | D |   | 2.56      |
| X | 101969840 | 101969840 | ARMCX5-GPRA | G protein-coupled receptor a   | NM | 001004051 | G | A | nonsynonymous SNV | G43A   | E15K   | M16 | T | B | 3.57      |
| X | 107449786 | 107449786 | COL4A6      | Collagen, type IV, alpha 6     | NM | 001287758 | G | A | nonsynonymous SNV | C571T  | P191S  | M16 | T | B | 2.98      |
| X | 110439150 | 110439150 | PAK3        | PAK3                           | NM | 001128168 | G | A | nonsynonymous SNV | G1299A | M433I  | M16 | T | B | 5.46      |
| X | 11157531  | 11157531  | ARHGAP6     | Rho GTPase activating protei   | NM | 013427    | C | T | nonsynonymous SNV | G2377A | D793N  | M16 | T | B | 1.1       |
| X | 115590032 | 115590032 | SLC6A14     | Solute carrier family 6 (amino | NM | 007231    | C | T | nonsynonymous SNV | C1840T | R614C  | M16 | D | D | 5.68      |
| X | 118708878 | 118708878 | UBE2A       | Ubiquitin-conjugating enzyme   | NM | 003336    | C | T | nonsynonymous SNV | C59T   | P20L   | M16 | D | D | 4.87      |
| X | 119694283 | 119694283 | CUL4B       | Cullin 4B                      | NM | 001079872 | G | A | nonsynonymous SNV | C211A  | Q71K   | M16 |   | B | 5.39      |
| X | 122532536 | 122532536 | GRIA3       | Glutamate receptor, ionotropi  | NM | 000828    | T | C | nonsynonymous SNV | T962C  | F321S  | M16 | T | D | 5.93      |
| X | 128621065 | 128621065 | SMARCA1     | SWI/SNF related, matrix assc   | NM | 001282874 | C | T | nonsynonymous SNV | G2147A | R716K  | M16 | T | B | 3.96      |
| X | 129306163 | 129306163 | RAB33A      | RAB33A, member RAS onco        | NM | 004794    | G | A | nonsynonymous SNV | G1078A | G43R   | M16 | D | D | 4.67      |
| X | 129306164 | 129306164 | RAB33A      | RAB33A, member RAS onco        | NM | 004794    | G | A | nonsynonymous SNV | G128A  | G43E   | M16 | D | D | 4.67      |
| X | 132352251 | 132352251 | TFDP3       | Transcription factor Dp family | NM | 016521    | C | T | nonsynonymous SNV | G37A   | E13K   | M16 | D | B | 0.235     |
| X | 134185895 | 134185895 | FAM127B     | Family with sequence similar   | NM | 001078172 | G | A | nonsynonymous SNV | C244T  | P82S   | M16 |   | P | 2.38      |
| X | 134989589 | 134989589 | SAGE1       | Sarcoma antigen 1              | NM | 018666    | C | T | nonsynonymous SNV | G955T  | P332L  | M16 | T | B | 1.07      |
| X | 135581923 | 135581923 | HTATSF1     | HIV-1 Tat specific factor 1    | NM | 001163280 | G | A | nonsynonymous SNV | C353A  | R118K  | M16 | T | P | 5.96      |
| X | 140995048 | 140995048 | MAGEC1      | Melanoma antigen family C1     | NM | 005462    | G | A | nonsynonymous SNV | G1858A | E620K  | M16 | D | B | -1.75     |
| X | 150349133 | 150349133 | GPR50       | G protein-coupled receptor 50  | NM | 004224    | G | A | nonsynonymous SNV | G1078A | E360K  | M16 | T | B | 3.7       |
| X | 150868495 | 150868495 | PRRG3       | Proline rich Gla (G-carboxygl  | NM | 024082    | C | T | nonsynonymous SNV | C35T   | S12L   | M16 | T | B | 3.95      |
| X | 151935268 | 151935268 | MAGEA3      | Melanoma antigen family A3     | NM | 005362    | G | A | nonsynonymous SNV | G899T  | S300F  | M16 | D | B | 0.488     |
| X | 154348337 | 154348337 | BRCC3       | BRCA1/BRCA2-containing co      | NM | 024332    | A | G | nonsynonymous SNV | A863G  | E288G  | M16 | D | P | 5.1       |
| X | 17819842  | 17819842  | RAI2        | Retinoic acid induced 2        | NM | 001172732 | C | T | nonsynonymous SNV | G139A  | E47K   | M16 | T | B | 5.4       |
| X | 20062628  | 20062628  | MAP7D2      | MAP7 domain containing 2       | NM | 001168465 | G | A | nonsynonymous SNV | C733T  | P245S  | M16 | T | P | 5.1       |
| X | 20134868  | 20134868  | MAP7D2      | MAP7 domain containing 2       | NM | 001168465 | C | T | nonsynonymous SNV | G130A  | G44S   | M16 | P | P | 3.22      |
| X | 24024728  | 24024728  | KLHL15      | Kelch-like family member 15    | NM | 030624    | C | T | nonsynonymous SNV | G83A   | G28E   | M16 | D | B | 4.57      |
| X | 26157335  | 26157335  | MAGEB18     | Melanoma antigen family B18    | NM | 173699    | C | T | nonsynonymous SNV | C233T  | S78L   | M16 | T | D | 3.8       |
| X | 30872664  | 30872664  | TAB3        | TGF-beta activated kinase 1/   | NM | 152787    | G | A | nonsynonymous SNV | C1118T | S373F  | M16 | D | B | 4.66      |
| X | 3229130   | 3229130   | MXRA5       | Matrix-remodelling associat    | NM | 015419    | C | T | nonsynonymous SNV | G7114A | G2372R | M16 | D | D | 4.29      |
| X | 3239147   | 3239147   | MXRA5       | Matrix-remodelling associat    | NM | 015419    | C | T | nonsynonymous SNV | G4579A | E1527K | M16 | T | B | 2.3       |
| X | 3241018   | 3241018   | MXRA5       | Matrix-remodelling associat    | NM | 015419    | C | T | nonsynonymous SNV | G2708A | G903E  | M16 | T | B | -3.78     |
| X | 36366352  | 36366352  | CXorf30     | Cilia and flagella associated  | NM | 001098843 | G | A | nonsynonymous SNV | G890A  | G297E  | M16 | T | D | 1.8       |
| X | 38267995  | 38267995  | OTC         | Ornithine carbamoyltransfera   | NM | 000531    | G | A | nonsynonymous SNV | G664A  | G222S  | M16 |   | P | 5.58      |
| X | 38267996  | 38267996  | OTC         | Ornithine carbamoyltransfera   | NM | 000531    | G | A | nonsynonymous SNV | G665A  | G222D  | M16 | D | D | 5.88      |
| X | 39911436  | 39911436  | BCOR        | BCL6 corepressor               | NM | 001123384 | C | T | nonsynonymous SNV | G5038A | E1680K | M16 | D | P | 5.63      |
| X | 46360621  | 46360621  | ZNF674      | Zinc finger protein 674        | NM | 001039891 | C | T | nonsynonymous SNV | G403A  | D135N  | M16 | T | B | -5.43E-04 |
| X | 49113469  | 49113469  | FOXP3       | Forkhead box P3                | NM | 014009    | C | T | nonsynonymous SNV | G455A  | G152E  | M16 | T | D | 4.14      |
| X | 53579280  | 53579280  | HUWE1       | HECT, UBA and WWE domain       | NM | 031407    | G | A | nonsynonymous SNV | C8873T | P2958L | M16 | T | D | 5.95      |
| X | 55783759  | 55783759  | RRAGB       | Ras-related GTP binding B      | M  | 006064    | C | T | nonsynonymous SNV | C938T  | S313F  | M16 | D | P | 4.39      |
| X | 63411366  | 63411366  | AMER1       | APC membrane recruitment       | NM | 152424    | G | A | stopgain          | C1801T | R601X  | M16 | T |   | -0.532    |
| X | 69646824  | 69646824  | GDPD2       | Glycerophosphodiester phos     | NM | 001171192 | C | T | nonsynonymous SNV | C665T  | P222L  | M16 | D | D | 2.6       |
| X | 73812165  | 73812165  | RLIM        | Ring finger protein, LIM doma  | NM | 016120    | G | A | nonsynonymous SNV | C985T  | R329C  | M16 | D | D | 5.73      |
| X | 77528774  | 77528774  | CYSLTR1     | Cysteinyln leukotriene recepti | NM | 001282186 | G | A | nonsynonymous SNV | C470T  | P157L  | M16 | D | D | 4.44      |

|    |           |           |          |                                 |                |   |   |                   |         |         |     |   |   |        |
|----|-----------|-----------|----------|---------------------------------|----------------|---|---|-------------------|---------|---------|-----|---|---|--------|
| X  | 79698499  | 79698499  | FAM46D   | Family with sequence similari   | NM_001170574   | G | A | nonsynonymous SNV | G461A   | G154E   | M16 | D | D | 4.8    |
| X  | 79980475  | 79980475  | BRWD3    | Bromodomain and WD repea        | NM_153252      | C | T | stopgain          | G1478A  | W493X   | M16 |   |   | 5.35   |
| X  | 83126562  | 83126562  | CYLC1    | Cylicin, basic protein of sperm | NM_021118      | C | T | nonsynonymous SNV | C161T   | S54L    | M16 | T | B | -2.28  |
| X  | 86890718  | 86890718  | KLHL4    | Kelch-like family member 4      | NM_057162      | C | A | nonsynonymous SNV | G1868A  | G623E   | M16 | D | D | 4.23   |
| X  | 88008527  | 88008527  | CPXCR1   | CPX chromosome region, cai      | NM_033048      | G | T | nonsynonymous SNV | C112T   | P38S    | M16 |   | B | -3.1   |
| X  | 88009148  | 88009148  | CPXCR1   | CPX chromosome region, cai      | NM_033048      | G | A | nonsynonymous SNV | G733A   | E245K   | M16 |   | B | 0.551  |
| X  | 99551325  | 99551325  | PCDH19   | Protocadherin 19                | NM_001184880   | G | A | nonsynonymous SNV | C3397T  | R1133C  | M16 | D | P | 4.65   |
| 12 | 109017374 | 109017374 | SELPLG   | Selectin P Ligand               | NM_001206609   | T | G | nonsynonymous SNV | A758C   | E253A   | M16 | T | B | -5.23  |
| 13 | 46170839  | 46170839  | ERICH6B  | Glutamate-Rich 6B               | NM_182542      | G | T | nonsynonymous SNV | C302A   | A101E   | M16 | D | B | -6.51  |
| 13 | 28498644  | 28498644  | PDX1     | Pancreatic And Duodenal Ho      | NM_000209      | G | C | nonsynonymous SNV | G658C   | V220L   | M16 | T | B | 3.12   |
| 2  | 179449692 | 179449692 | TTN      | Titin                           | NM_001267550   | G | C | nonsynonymous SNV | C64676G | A21559G | M16 | D | B | 5.3    |
| 15 | 89398295  | 89398295  | ACAN     | aggrecan                        | NM_013227      | A | T | stopgain          | A2479T  | K827X   | M16 | T |   | -3.62  |
| 11 | 44098842  | 44098842  | ACCS     | 1-Aminocyclopropane-1-Carb      | NM_001127219   | C | G | nonsynonymous SNV | C570G   | I190M   | M16 | D | P | 3.87   |
| 7  | 44146353  | 44146353  | AEBP1    | AE binding protein 1            | NM_001129      | A | T | nonsynonymous SNV | A462T   | K154N   | M16 | D | D | -0.51  |
| 2  | 27324371  | 27324371  | CGREF1   | Cell Growth Regulator With E    | NM_006569      | C | T | nonsynonymous SNV | G728A   | G243E   | M16 | T | B | 1.69   |
| 19 | 1440068   | 1440068   | RPS15    | ribosomal protein S15           | NM_001018      | G | C | nonsynonymous SNV | G140C   | R47P    | M16 | T | B | 3.21   |
| 1  | 153275079 | 153275079 | PGLYRP3  | peptidoglycan recognition prc   | NM_052891      | G | T | stopgain          | C534A   | C178X   | M17 | T |   | 1.47   |
| 1  | 154897670 | 154897670 | PMVK     | phosphomevalonate kinase        | NM_006556      | C | A | stopgain          | G514T   | G172X   | M17 |   |   |        |
| 1  | 169510246 | 169510246 | F5       | coagulation factor V (proacce   | NM_000130      | G | A | nonsynonymous SNV | C4082T  | P1361L  | M17 | T | B | -0.403 |
| 1  | 173878973 | 173878973 | SERPINC1 | serpin peptidase inhibitor, cla | NM_000488      | G | T | nonsynonymous SNV | C870A   | F290L   | M17 | T | D | 3.57   |
| 10 | 14976709  | 14976709  | DCLRE1C  | DNA cross-link repair 1C        | NM_001033855.2 | G | T | nonsynonymous SNV | C530A   | P177Q   | M17 | D | D | 3.95   |
| 10 | 5009127   | 5009127   | AKR1C1   | aldo-keto reductase family 1,   | NM_001353      | C | A | stopgain          | C261A   | C87X    | M17 | T |   | -5     |
| 11 | 117050160 | 117050160 | SID2     | SID1 transmembrane family,      | NM_001040455   | A | T | nonsynonymous SNV | A181T   | R61W    | M17 | T | B | 1.63   |
| 11 | 65350589  | 65350589  | EHBP1L1  | EH domain binding protein 1-    | NM_001099409   | A | T | nonsynonymous SNV | A2446T  | T816S   | M17 | T | B | -5.02  |
| 11 | 6648292   | 6648292   | DCHS1    | dachsous cadherin-related 1     | NM_003737      | G | T | nonsynonymous SNV | C5978A  | A1993D  | M17 | T | B | 5.18   |
| 12 | 122691869 | 122691869 | B3GNT4   | UDP-GlcNAc:betaGal beta-1,      | NM_030765      | G | T | nonsynonymous SNV | G1071T  | W357C   | M17 | T | D | 4.91   |
| 12 | 52699033  | 52699033  | KRT86    | keratin 86, type II             | NM_002284      | G | A | nonsynonymous SNV | G745A   | V249I   | M17 | T | B | 0.639  |
| 14 | 23828947  | 23828947  | EFS      | embryonal Fyn-associated su     | NM_005864.3    | C | G | nonsynonymous SNV | G740C   | G247A   | M17 | T | B | 2.6    |
| 14 | 50582893  | 50582893  | VCPKMT   | valosin containing protein lysi | NM_024558.2    | C | A | nonsynonymous SNV | G271T   | D91Y    | M17 | D | B | 0.76   |
| 14 | 77872423  | 77872423  | NOXRED1  | NADP-dependent oxidoreduc       | NM_00113475    | G | T | nonsynonymous SNV | C738A   | N246K   | M17 | D | D | 1.1    |
| 15 | 101188555 | 101188555 | ASB7     | ankyrin repeat and SOCS bo      | NM_198243      | G | T | nonsynonymous SNV | G845T   | C282F   | M17 | D | D | 5.51   |
| 15 | 66048683  | 66048683  | DENND4A  | DENN/MADD domain contain        | NM_001144823.1 | G | T | nonsynonymous SNV | C106A   | H36N    | M17 | T | P | 5.6    |
| 15 | 84651232  | 84651232  | ADAMTSL3 | ADAMTS-like 3                   | NM_207517.2    | G | T | nonsynonymous SNV | G2852T  | R951L   | M17 | T | B | -3.93  |
| 16 | 18859355  | 18859355  | SMG1     | SMG1 phosphatidylinositol 3-    | NM_015092      | C | A | nonsynonymous SNV | G5624T  | G1875V  | M17 | T | D | 5.83   |
| 16 | 28497683  | 28497683  | CLN3     | ceroid-lipofuscinosis, neuron   | NM_001042432.1 | G | T | nonsynonymous SNV | C662A   | A221D   | M17 | T | P | 0.596  |
| 16 | 58575414  | 58575414  | CNOT1    | CCR4-NOT transcription com      | NM_016284.4    | C | A | nonsynonymous SNV | G4791T  | Q1597H  | M17 | T | P | 3.73   |
| 16 | 66503736  | 66503736  | BEAN1    | brain expressed, associated v   | NM_001178020   | G | T | nonsynonymous SNV | G257T   | R86L    | M17 | D |   | 1.69   |
| 17 | 40706526  | 40706526  | HSD17B1  | hydroxysteroid (17-beta) deh    | NM_000413      | C | A | nonsynonymous SNV | C643A   | R215S   | M17 | T | B | 3.19   |
| 17 | 650972    | 650972    | GEMIN4   | gem (nuclear organelle) asso    | NM_015721      | A | T | nonsynonymous SNV | T311A   | I104N   | M17 | D | D | 5.66   |
| 19 | 21720666  | 21720666  | ZNF429   | zinc finger protein 429         | NM_001001415   | G | T | nonsynonymous SNV | G1811T  | R604L   | M17 | T | B | -1.05  |
| 19 | 23544189  | 23544189  | ZNF91    | zinc finger protein 91          | NM_003430.3    | A | T | stopgain          | T1592A  | L531X   | M17 | T |   | -3.43  |
| 19 | 2933655   | 2933655   | ZNF77    | zinc finger protein 77          | NM_021217      | T | A | nonsynonymous SNV | A1470T  | K490N   | M17 | D | P | 1.11   |
| 19 | 48204714  | 48204714  | GLTSCR1  | glioma tumor suppressor can     | NM_015711      | A | A | nonsynonymous SNV | T3725A  | L1242Q  | M17 | T | B | -0.247 |
| 19 | 51295421  | 51295421  | ACPT     | acid phosphatase, testicular    | NM_033068      | G | T | nonsynonymous SNV | G542T   | G181V   | M17 | T | B | 4.39   |
| 19 | 52569365  | 52569365  | ZNF841   | zinc finger protein 841         | NM_001136499   | C | A | nonsynonymous SNV | G1770T  | M590I   | M17 | T | B | -3.79  |
| 19 | 58385047  | 58385047  | ZNF814   | zinc finger protein 814         | NM_001144989   | G | T | nonsynonymous SNV | C1711A  | P571T   | M17 | T | B | -3.34  |
| 2  | 10192380  | 10192380  | KLF11    | Kruppel-like factor 11          | NM_003597.4    | G | T | nonsynonymous SNV | G1285T  | D429Y   | M17 | D | D | 6.08   |
| 2  | 135095939 | 135095939 | MGAT5    | mannosyl (alpha-1,6-)glycop     | NM_002410      | C | A | nonsynonymous SNV | C755A   | A252E   | M17 | D | D | 5.76   |
| 2  | 179517223 | 179517223 | TTN      | titin                           | NM_001267550   | G | T | nonsynonymous SNV | C39089A | A13030E | M17 | D | B | -1.86  |
| 2  | 198669955 | 198669955 | PLCL1    | phospholipase C-like 1          | NM_006226      | C | A | nonsynonymous SNV | C132A   | D44E    | M17 |   | B | 3.14   |
| 2  | 219694800 | 219694800 | PRKAG3   | protein kinase, AMP-activate    | NM_017431      | T | A | nonsynonymous SNV | A534T   | K178N   | M17 | T | P | -0.09  |
| 2  | 223806303 | 223806303 | ACSL3    | acyl-CoA synthetase lonq-ch     | NM_004457.3    | C | G | nonsynonymous SNV | C2094G  | F698L   | M17 | T | B | 6.03   |
| 2  | 239059531 | 239059531 | KLHL30   | kelch-like family member 30     | NM_198582      | G | T | nonsynonymous SNV | G1562T  | R521L   | M17 | T | B | 4.66   |
| 2  | 3504756   | 3504756   | ADI1     | acireductone dioxygenase 1      | NM_018269      | C | A | nonsynonymous SNV | G249T   | M83I    | M17 | T | B | 2.9    |
| 2  | 7035925   | 7035925   | RSAD2    | radical S-adenosyl methionin    | NM_080657      | G | T | nonsynonymous SNV | G938T   | C313F   | M17 | D | D | 5.57   |
| 20 | 10389309  | 10389309  | MKKS     | McKusick-Kaufman syndrom        | NM_018848.3    | G | T | stopgain          | C1128A  | C376X   | M17 | T |   | 3.78   |
| 20 | 43851376  | 43851376  | SEMG2    | semenogelin II                  | NM_003008      | G | T | nonsynonymous SNV | G1103T  | G368V   | M17 | D | P | -2.11  |
| 20 | 44207868  | 44207868  | WFDC8    | WAP four-disulfide core dom     | NM_181510.2    | C | T | nonsynonymous SNV | G19A    | E7K     | M17 | T | B | -4.02  |
| 22 | 23654017  | 23654017  | BCR      | breakpoint cluster region       | NM_004327.3    | G | A | nonsynonymous SNV | G3316A  | D1106N  | M17 | T | P | 4.49   |
| 22 | 45607850  | 45607850  | KIAA0930 | KIAA0930                        | NM_015264.1    | G | T | nonsynonymous SNV | C218A   | A73E    | M17 | T | B | -10.4  |
| 3  | 100020913 | 100020913 | TBC1D23  | TBC1 domain family, membe       | NM_001199198.2 | G | T | nonsynonymous SNV | G1095T  | M365I   | M17 |   | P | 4.97   |
| 3  | 132319393 | 132319393 | ACKR4    | atypical chemokine receptor     | NM_178445.2    | T | C | nonsynonymous SNV | T152C   | V51A    | M17 | T | B | 5.4    |
| 3  | 195508558 | 195508558 | MUC4     | mucin 4, cell surface associat  | NM_018406      | A | T | nonsynonymous SNV | T9893A  | L3298H  | M17 |   | B | 0      |
| 3  | 49662632  | 49662632  | BSN      | bassoon presynaptic cytomat     | NM_003458      | G | T | nonsynonymous SNV | G449T   | S150I   | M17 | T | B | 5.34   |
| 3  | 50679738  | 50679738  | MAPKAPK3 | mitogen-activated protein kin   | NM_001243926.1 | A | T | nonsynonymous SNV | A479T   | H160L   | M17 | T | B | -2.44  |
| 4  | 39114653  | 39114653  | KLHL5    | Kelch-like family member 5      | NM_001007075   | G | T | nonsynonymous SNV | G1702T  | G568C   | M17 | D | D | 5.67   |
| 4  | 85678262  | 85678262  | WDFY3    | WD repeat and FYVE domair       | NM_014991      | G | T | nonsynonymous SNV | C5241A  | N1747K  | M17 | T | B | 4.3    |

|    |           |           |          |                                 |                 |   |   |                   |         |         |     |   |   |        |
|----|-----------|-----------|----------|---------------------------------|-----------------|---|---|-------------------|---------|---------|-----|---|---|--------|
| 6  | 155450429 | 155450429 | TIAM2    | T-cell lymphoma invasion anc    | NM_012454       | G | T | nonsynonymous SNV | G72T    | K24N    | M17 | D | D | 2.38   |
| 6  | 168376881 | 168376881 | HGC6.3   |                                 | M_00129895      | T | G | nonsynonymous SNV | A452C   | Q151P   | M17 |   |   |        |
| 6  | 52141122  | 52141122  | MCM3     | Minichromosome maintenanc       | NM_001270472    | C | A | nonsynonymous SNV | G1348T  | A450S   | M17 | D | D | 5.13   |
| 7  | 100137015 | 100137015 | AGFG2    | ArfGAP With FG Repeats 2        | NM_006076       | A | T | nonsynonymous SNV | A46T    | S16C    | M17 | T | B | -1.01  |
| 7  | 112127073 | 112127073 | LSMEM1   | Leucine-rich single-pass men    | NM_001134468    | C | A | nonsynonymous SNV | C223A   | L75M    | M17 | D | D | 1.99   |
| 7  | 151932916 | 151932916 | KMT2C    | Lysine (K)-Specific Methyltra   | NM_170606       | C | G | nonsynonymous SNV | G2755C  | V919L   | M17 | T | B | 3.05   |
| 7  | 5541062   | 5541062   | FBXL18   | F-box and leucine-rich repeat   | NM_024963       | T | A | stopgain          | A838T   | K280X   | M17 | T |   | 4.37   |
| 7  | 72951692  | 72951692  | BCL7B    | B-cell CLL/lymphoma 7B          | NM_001707       | G | C | nonsynonymous SNV | C545G   | A182G   | M17 | D | D | 5.13   |
| 9  | 113637948 | 113637948 | LPAR1    | Lysophosphatidic acid recept    | NM_057159       | C | A | nonsynonymous SNV | G848T   | C283F   | M17 | D | D | 6.06   |
| X  | 152083364 | 152083364 | ZNF185   | Zinc finger protein 185         | NM_001178106    | G | T | stopgain          | G145T   | E49X    | M17 | D | P | 4.96   |
| X  | 48564755  | 48564755  | SUV39H1  | Suppressor of variegation 3-5   | NM_001282166    | G | T | nonsynonymous SNV | G961T   | V321L   | M17 | D | P | 4.56   |
| X  | 48681607  | 48681607  | HDAC6    | Histone deacetylase 6           | NM_006044       | T | A | nonsynonymous SNV | T2798A  | M933K   | M17 | T | B | -7.62  |
| 19 | 49558211  | 49558211  | CGB7     | Chorionic Gonadotropin, Bet     | NM_033142       | T | G | nonsynonymous SNV | A70C    | M24L    | M17 |   |   | 946    |
| 12 | 109017374 | 109017374 | SELPLG   | Selectin P Ligand               | NM_001206609    | T | G | nonsynonymous SNV | A758C   | E253A   | M17 | T | B | -5.23  |
| 7  | 57529086  | 57529086  | ZNF716   | Zinc Finger Protein 716         | NM_001159279    | C | A | nonsynonymous SNV | C919A   | R307S   | M17 | T | B | -2.18  |
| 17 | 7483366   | 7483366   | CD68     | CD68 Molecule                   | NM_001251       | T | A | nonsynonymous SNV | T288A   | N96K    | M17 | T | B | -5.96  |
| 11 | 618683    | 618683    | CDHR5    | Cadherin-Related Family Mei     | NM_021924       | T | A | nonsynonymous SNV | A1876T  | T626S   | M17 | T | B | 592    |
| 2  | 113588140 | 113588140 | IL1B     | Interleukin 1, Beta             | NM_000576       | G | T | nonsynonymous SNV | C608A   | P203H   | M17 | T | D | 3.63   |
| 11 | 77614590  | 77614590  | INTS4    | Integrator Complex Subunit 4    | NM_033547       | G | G | nonsynonymous SNV | A2093C  | K698T   | M17 | T | B | 4.41   |
| 2  | 179449692 | 179449692 | TTN      | Titin                           | NM_001267550    | G | C | nonsynonymous SNV | C64676G | A21559G | M17 | D | B | 5.3    |
| 11 | 618667    | 618667    | CDHR5    | Cadherin-Related Family Mei     | NM_021924       | C | A | nonsynonymous SNV | G1892T  | G631V   | M17 | D | B | 446    |
| 12 | 51740409  | 51740409  | CELA1    | chymotrypsin-like elastase fa   | NM_001971       | T | G | nonsynonymous SNV | A14C    | Y5S     | M17 | T | B | 1.29   |
| 12 | 51740410  | 51740410  | CELA1    | chymotrypsin-like elastase fa   | NM_001971       | A | G | nonsynonymous SNV | T13C    | Y5H     | M17 | T | B | 2.28   |
| 2  | 113588132 | 113588132 | IL1B     | Interleukin 1, Beta             | NM_000576       | A | G | nonsynonymous SNV | T616A   | Y206N   | M17 | T | D | 2.95   |
| 11 | 48511193  | 48511193  | OR4A47   | olfactory receptor, family 4, s | NM_001005512    | A | T | nonsynonymous SNV | A849T   | L283F   | M17 | T | B | -4.51  |
| 1  | 152129130 | 152129130 | RPTN     | repetin                         | NM_001122965    | G | T | nonsynonymous SNV | C445A   | P149T   | M17 | T | B | -10.4  |
| 19 | 20229099  | 20229099  | ZNF90    | Zinc Finger Protein 90          | NM_007138       | G | T | nonsynonymous SNV | G736T   | A246S   | M17 |   | B | -2.22  |
| 19 | 20045163  | 20045163  | ZNF93    | Zinc Finger Protein 93          | NM_031218       | T | A | nonsynonymous SNV | T1399A  | S467T   | M17 | T | B | -1.7   |
| 19 | 53269382  | 53269382  | ZNF600   | Zinc Finger Protein 600         | NM_198457       | A | T | nonsynonymous SNV | T1627A  | C543S   | M17 | T | D | -3.02  |
| 1  | 227842419 | 227842419 | ZNF678   | Zinc Finger Protein 678         | NM_178549       | C | A | nonsynonymous SNV | C633A   | D211E   | M17 | T | B | -2.68  |
| 1  | 101490945 | 101490945 | DPH5     | diphthamide biosynthesis 5      | NM_001077394.1  | C | C | nonsynonymous SNV | G55A    | G19S    | M2  | D | D | 6.08   |
| 1  | 155582064 | 155582064 | MSTO1    | misato 1, mitochondrial distri  | NM_018116.3     | G | C | nonsynonymous SNV | G770C   | G257A   | M2  | T | D | 3.17   |
| 1  | 156843445 | 156843445 | NTRK1    | neurotrophic tyrosine kinase    | NM_002529.3     | C | C | nonsynonymous SNV | C871T   | H291Y   | M2  | T | B | 5.03   |
| 1  | 161641245 | 161641245 | FCGR2B   | Fc fragment of IgG, low affini  | NM_004001.4     | C | G | nonsynonymous SNV | C197G   | S66C    | M2  | D | P | -6.97  |
| 1  | 162551088 | 162551088 | UAP1     | UDP-N-acetylglucosamine py      | NM_003115       | G | T | nonsynonymous SNV | G673T   | G225C   | M2  | D | D | 5.14   |
| 1  | 173019932 | 173019932 | TNFSF18  | tumor necrosis factor (ligand)  | NM_005092       | C | A | nonsynonymous SNV | G171T   | L57F    | M2  | T | B | -0.765 |
| 1  | 220273854 | 220273854 | IARS2    | isoleucyl-tRNA synthetase 2,    | NM_018060       | G | T | nonsynonymous SNV | G413T   | R138L   | M2  | D | D | 5.95   |
| 1  | 236727946 | 236727946 | HEATR1   | HEAT repeat containing 1        | NM_018072       | G | G | nonsynonymous SNV | C4451A  | A1484E  | M2  | T | B | 3.95   |
| 1  | 248224578 | 248224578 | OR2L3    | olfactory receptor, family 2, s | NM_001004687    | T | C | nonsynonymous SNV | T595C   | F199L   | M2  | T | P | 0.915  |
| 1  | 27876669  | 27876669  | AHDC1    | AT hook, DNA binding motif,     | NM_001029882    | T | C | nonsynonymous SNV | A1958G  | Q653R   | M2  | D | P | 5.51   |
| 10 | 37488676  | 37488676  | ANKRD30A | ANKRD30A                        | NM_052997       | C | T | nonsynonymous SNV | C2570T  | S857L   | M2  | T | B | -1.26  |
| 10 | 99211890  | 99211890  | ZDHHC16  | zinc finger, DHHC-type conta    | NM_032327.3     | C | A | nonsynonymous SNV | C287A   | A96D    | M2  | T | P | 4.64   |
| 11 | 1263899   | 1263899   | MUC5B    | mucin 5B, oligomeric mucus/i    | NM_002458       | T | A | nonsynonymous SNV | T5789A  | L1930Q  | M2  | D | B | -1.43  |
| 11 | 128839734 | 128839734 | ARHGAP32 | Rho GTPase activating protei    | NM_001142685.1  | G | A | nonsynonymous SNV | C5332T  | P1778S  | M2  | D | P | 4.95   |
| 11 | 13443375  | 13443375  | BTBD10   | BTB (POZ) domain containin      | NM_001297742.1  | G | A | nonsynonymous SNV | C136T   | R46C    | M2  | D | B | 5.11   |
| 11 | 55595510  | 55595510  | OR5L2    | olfactory receptor, family 5, s | NM_001004739    | A | T | nonsynonymous SNV | A816T   | K272N   | M2  | D | D | -5.35  |
| 11 | 73022316  | 73022316  | ARHGEF17 | Rho guanine nucleotide exch     | NM_014786       | C | T | nonsynonymous SNV | C2633T  | A878V   | M2  | T | D | 2.77   |
| 12 | 123812357 | 123812357 | SBNO1    | strawberry notch homolog 1      | (NM_001167856.1 | C | A | nonsynonymous SNV | G1435T  | A479S   | M2  | D | D | 6.03   |
| 12 | 50499359  | 50499359  | GPD1     | glycerol-3-phosphate dehydr     | NM_005276       | C | A | nonsynonymous SNV | C248A   | A83E    | M2  | D | D | 4.47   |
| 12 | 52981518  | 52981518  | KRT72    | keratin 72, type II             | NM_080747.2     | G | C | nonsynonymous SNV | C1207G  | L403V   | M2  | D | D | 4.92   |
| 12 | 56090158  | 56090158  | ITGA7    | integrin, alpha 7               | NM_001144996.1  | G | C | nonsynonymous SNV | C1808G  | T603S   | M2  | T | B | -0.461 |
| 12 | 6493830   | 6493830   | LTBR     | lymphotoxin beta receptor (T    | NM_002342.2     | G | A | nonsynonymous SNV | G173A   | C58Y    | M2  | D | D | 5.06   |
| 13 | 101742049 | 101742049 | NALCN    | sodium leak channel, non sel    | NM_052867       | C | T | nonsynonymous SNV | G3454A  | V1152I  | M2  | T | P | 5.77   |
| 13 | 28498647  | 28498647  | PDX1     | pancreatic and duodenal hom     | NM_000209       | G | C | nonsynonymous SNV | G661C   | A221P   | M2  | T | B | 1.87   |
| 14 | 100377911 | 100377911 | EML1     | echinoderm microtubule assc     | NM_001008707.1  | G | T | stopgain          | G1549T  | E517X   | M2  | D |   | 5.72   |
| 14 | 102483555 | 102483555 | DYNC1H1  | dynein, cytoplasmic 1, heavy    | NM_001376       | T | G | nonsynonymous SNV | T7979G  | V2660G  | M2  | D | D | 5.46   |
| 15 | 58467216  | 58467216  | AQP9     | aquaporin 9                     | NM_020980       | C | C | nonsynonymous SNV | C476T   | A159V   | M2  | T | B | -2.17  |
| 15 | 71125439  | 71125439  | LARP6    | La ribonucleoprotein domain     | NM_018357       | C | A | nonsynonymous SNV | G428T   | R143L   | M2  | T | D | 4.68   |
| 15 | 89400137  | 89400137  | ACAN     | aggrecan                        | NM_013227.3     | A | T | nonsynonymous SNV | A4321T  | T1441S  | M2  | T | B | -1.44  |
| 16 | 27460236  | 27460236  | IL21R    | interleukin 21 receptor         | NM_181078.2     | C | A | nonsynonymous SNV | C1249A  | P417T   | M2  | T | B | 2.13   |
| 17 | 10368822  | 10368822  | MYH4     | myosin, heavy chain 4, skelel   | NM_017533       | G | A | nonsynonymous SNV | C442T   | R148C   | M2  | D | D | 4.95   |
| 17 | 18397545  | 18397545  | LGALS9C  | lectin, galactoside-binding, sc | NM_001040078    | T | A | stopgain          | T935A   | L312X   | M2  | T |   | 0.817  |
| 17 | 34072954  | 34072954  | GAS2L2   | growth arrest-specific 2 like 2 | NM_139285       | C | T | nonsynonymous SNV | G1562A  | G521D   | M2  | D | B | 3.73   |
| 17 | 39538608  | 39538608  | KRT34    | keratin 34, type I              | NM_021013       | G | C | nonsynonymous SNV | C17G    | P6R     | M2  | D | B | 4.85   |
| 17 | 41165636  | 41165636  | IFI35    | interferon-induced protein 35   | NM_005533       | G | T | nonsynonymous SNV | G525T   | E175D   | M2  | T | P | -4.89  |
| 18 | 2688669   | 2688669   | SMCHD1   | structural maintenance of chr   | NM_015295       | G | G | nonsynonymous SNV | T797G   | V266G   | M2  | D | P | 5.07   |
| 18 | 44560214  | 44560214  | TCEB3B   | transcription elongation factoi | NM_016427       | T | C | stopgain          | C1422G  | Y474X   | M2  | T |   | 1.74   |

|    |           |           |          |                                  |                |   |   |                   |         |        |    |   |   |        |
|----|-----------|-----------|----------|----------------------------------|----------------|---|---|-------------------|---------|--------|----|---|---|--------|
| 18 | 50278534  | 50278534  | DCC      | DCC netrin 1 receptor            | NM_005215      | G | A | nonsynonymous SNV | G202A   | G68R   | M2 | D | B | 5.52   |
| 19 | 45656956  | 45656956  | NKPD1    | NTPase, KAP family P-loop d      | NM_198478      | C | G | nonsynonymous SNV | G739C   | G247R  | M2 | T | P | 5.09   |
| 2  | 160994116 | 160994116 | ITGB6    | integrin, beta 6                 | NM_000888.4    | G | T | nonsynonymous SNV | C1489A  | L497M  | M2 | T | B | 1.03   |
| 2  | 239177587 | 239177587 | PER2     | period circadian clock 2         | NM_022817      | C | A | nonsynonymous SNV | G801T   | E267D  | M2 | T | D | 3.04   |
| 20 | 33028122  | 33028122  | ITCH     | itchy E3 ubiquitin protein ligas | NM_001257137.1 | C | A | nonsynonymous SNV | C965A   | P322H  | M2 | D | B | 5.19   |
| 21 | 15599340  | 15599340  | RBM11    | RNA binding motif protein 11     | NM_144770      | A | G | nonsynonymous SNV | A572G   | H191R  | M2 | T | B | 0.568  |
| 3  | 100038002 | 100038002 | TBC1D23  | TBC1 domain family, member       | NM_001199198.2 | C | A | nonsynonymous SNV | C1777A  | H593N  | M2 |   | B | 6.06   |
| 3  | 111312874 | 111312874 | ZBED2    | zinc finger, BED-type contain    | NM_024508      | C | A | stopgain          | G175T   | E59X   | M2 | T |   | 1.77   |
| 3  | 113378424 | 113378424 | KIAA2018 | KIAA2018                         | NM_001009899   | T | A | nonsynonymous SNV | A2105T  | N702I  | M2 | D | P | 4.2    |
| 3  | 183028799 | 183028799 | MCF2L2   | MCF.2 cell line derived transf   | NM_015078      | A | C | nonsynonymous SNV | T897G   | D299E  | M2 | T | B | 4.37   |
| 3  | 186961288 | 186961288 | MASP1    | mannan-binding lectin serine     | NM_001879.5    | C | A | nonsynonymous SNV | G1212T  | M404I  | M2 | T | B | 4.69   |
| 3  | 193132524 | 193132524 | ATP13A4  | ATPase type 13A4                 | NM_032279      | G | T | nonsynonymous SNV | C2858A  | A953D  | M2 | D | D | 5.15   |
| 4  | 190873403 | 190873403 | FRG1     | FSDH region gene 1               | NM_004477      | G | A | nonsynonymous SNV | G220A   | D74N   | M2 | T | B | 3.47   |
| 4  | 55599320  | 55599320  | KIT      | v-kit Hardy-Zuckerman 4 felin    | M_000222       | G | T | nonsynonymous SNV | G2446T  | D816Y  | M2 | D | D | 5.62   |
| 5  | 176520204 | 176520204 | FGFR4    | Fibroblast growth factor recep   | NM_002011      | T | C | nonsynonymous SNV | T1123C  | S375P  | M2 | D | B | 4.98   |
| 5  | 180335752 | 180335752 | BTNL8    | Butyrophilin-like 8              | NM_001040462   | C | A | nonsynonymous SNV | C216A   | D72E   | M2 | T | B | -1.34  |
| 5  | 64521977  | 64521977  | ADAMTS6  | ADAM metalloproteinase with      | NM_197941      | G | A | nonsynonymous SNV | G2003T  | A668V  | M2 | T | D | 5.2    |
| 6  | 29408000  | 29408000  | OR10C1   | Olfactory receptor, family 10,   | NM_013941      | A | T | nonsynonymous SNV | A208T   | I70F   | M2 | D | D | 2.39   |
| 6  | 43230895  | 43230895  | TTBK1    | Tau Tubulin Kinase 1             | NM_032538      | G | A | nonsynonymous SNV | G1793A  | R598H  | M2 | D | D | 5.29   |
| 7  | 100645959 | 100645959 | MUC12    | Mucin 12, Cell Surface Assoc     | NM_001164462   | G | T | nonsynonymous SNV | G12115T | D4039Y | M2 | D |   | -1.72  |
| 7  | 100677245 | 100677245 | MUC17    | Mucin 17, Cell Surface Assoc     | NM_001040105   | G | T | nonsynonymous SNV | G2548T  | A850S  | M2 | T | B | -2.29  |
| 7  | 151970951 | 151970951 | KMT2C    | Lysine (K)-Specific Methyltra    | NM_170606      | C | T | nonsynonymous SNV | G851A   | R284Q  | M2 | D | P | 4.87   |
| 7  | 33044951  | 33044951  | FKBP9    | FK506 binding protein 9, 63 k    | NM_001284341   | C | G | nonsynonymous SNV | C1860G  | H620Q  | M2 | D | D | -3.51  |
| 7  | 34192846  | 34192846  | BMPER    | BMP binding endothelial regu     | NM_133468      | G | T | nonsynonymous SNV | G2019T  | K673N  | M2 | T | B | 3.76   |
| 7  | 37890245  | 37890245  | NME8     | NME/NM23 family member 8         | NM_016616      | C | T | stopgain          | C106T   | Q36X   | M2 | D |   | 5.01   |
| 7  | 45123066  | 45123066  | NACAD    | NAC alpha domain containing      | NM_001146334   | G | T | nonsynonymous SNV | C2713A  | P905T  | M2 | T | B | -0.565 |
| 7  | 5105019   | 5105019   | RBAK     | RB-associated KRAB zinc fin      | NM_021163      | C | A | nonsynonymous SNV | C1932A  | S644R  | M2 |   | D | 3.68   |
| 7  | 55240716  | 55240716  | EGFR     | Epidermal growth factor          | NM_005228      | C | A | nonsynonymous SNV | C1960A  | L654I  | M2 | T | B | 4.78   |
| 7  | 73474285  | 73474285  | ELN      | elastin                          | NM_001278939   | T | C | nonsynonymous SNV | T1571C  | V524A  | M2 | T | B | -2.18  |
| 8  | 52732961  | 52732961  | PCMTD1   | Protein-L-isoaspartate (D-asp    | NM_052937      | G | A | nonsynonymous SNV | C1024T  | P342S  | M2 | D | D | 6.07   |
| 9  | 125486686 | 125486686 | OR1L4    | Olfactory Receptor, Family 1,    | NM_001005235   | T | C | nonsynonymous SNV | T418C   | W140R  | M2 | T | B | -0.339 |
| 9  | 33385103  | 33385103  | AQP7     | Aquaporin 7                      | NM_001170      | G | A | nonsynonymous SNV | C929T   | T310M  | M2 | T | B | -7.4   |
| X  | 49179739  | 49179739  | GAGE12J  | G antigen 12J                    | NM_001098406   | A | G | nonsynonymous SNV | A67G    | M23V   | M2 | T | B | -1.36  |
| 19 | 49558211  | 49558211  | CGB7     | Chorionic Gonadotropin, Beta     | NM_033142      | T | G | nonsynonymous SNV | A70C    | M24L   | M2 |   |   | 946    |
| 7  | 100645960 | 100645960 | MUC12    | Mucin12                          | NM_001164462   | A | T | nonsynonymous SNV | A12116T | D4039V | M2 | T |   | -1.72  |
| 7  | 57529086  | 57529086  | ZNF716   | Zinc Finger Protein 716          | NM_001159279   | C | A | nonsynonymous SNV | C919A   | R307S  | M2 | T | B | -218   |
| 17 | 7483366   | 7483366   | CD68     | CD68 Molecule                    | NM_001251      | T | A | nonsynonymous SNV | T288A   | N96K   | M2 | T | B | -5.96  |
| 11 | 618683    | 618683    | CDHR5    | Cadherin-Related Family Mem      | NM_021924      | T | A | nonsynonymous SNV | A1876T  | T626S  | M2 | T | B | 592    |
| 11 | 77614590  | 77614590  | INTS4    | Integrator Complex Subunit 4     | NM_033547      | T | G | nonsynonymous SNV | A2093C  | K698T  | M2 | T | B | 4.41   |
| 7  | 100639761 | 100639761 | MUC12    | Mucin12                          | NM_001164462   | G | C | nonsynonymous SNV | G5917C  | D1973H | M2 | T |   | -275   |
| 3  | 195452870 | 195452870 | MUC20    | Mucin20                          | NM_001282506   | G | A | nonsynonymous SNV | G1396A  | E466K  | M2 | T | B | 2.47   |
| 13 | 28498644  | 28498644  | PDX1     | Pancreatic And Duodenal Ho       | NM_000209      | G | C | nonsynonymous SNV | G658C   | V220L  | M2 | T | B | 3.12   |
| 11 | 618667    | 618667    | CDHR5    | Cadherin-Related Family Mem      | NM_021924      | C | A | nonsynonymous SNV | G1892T  | G631V  | M2 | D | B | 446    |
| 19 | 49558216  | 49558216  | CGB7     | Chorionic Gonadotropin, Beta     | NM_033142      | C | T | nonsynonymous SNV | G65A    | R22K   | M2 | T |   | -353   |
| 14 | 23828948  | 23828948  | EF5      | embryonal Fyn-associated su      | NM_005864      | C | G | nonsynonymous SNV | G739C   | G247R  | M2 | T | B | 2.64   |
| 8  | 2092844   | 2092844   | MYOM2    | myomesin 2                       | NM_003970      | C | G | nonsynonymous SNV | C4337G  | A1446G | M2 | T | B | -1.53  |
| 1  | 145296373 | 145296373 | NBPF10   | Neuroblastoma Breakpoint F       | NM_001039703   | G | T | nonsynonymous SNV | G295T   | V99F   | M2 | D |   | -158   |
| 1  | 248801610 | 248801610 | OR2T35   | Olfactory Receptor Family 2, J   | NM_001001827   | G | A | nonsynonymous SNV | C950T   | A317V  | M2 | T | B | -3.53  |
| 1  | 227842419 | 227842419 | ZNF678   | Zinc Finger Protein 678          | NM_178549      | C | A | nonsynonymous SNV | C633A   | D211E  | M2 | T | B | -2.68  |
| 1  | 110766454 | 110766454 | KCNK4    | potassium channel, voltage g     | NM_004978.4    | G | A | nonsynonymous SNV | G1547A  | R516Q  | M4 | T | P | 4.89   |
| 1  | 111717566 | 111717566 | CEPT1    | choline/ethanolamine phosph      | NM_006090.3    | C | A | nonsynonymous SNV | C695A   | P232Q  | M4 | T | P | 5.98   |
| 1  | 11561164  | 11561164  | PTCHD1   | patched domain containing 2      | NM_020780      | G | A | nonsynonymous SNV | G115A   | G39R   | M4 | T | B | 4.85   |
| 1  | 11574454  | 11574454  | PTCHD2   | patched domain containing 2      | NM_020780      | C | T | stopgain          | C1324T  | Q442X  | M4 | T |   | 5.03   |
| 1  | 120484365 | 120484365 | NOTCH2   | notch 2                          | NM_024408      | T | C | nonsynonymous SNV | A2765G  | N922S  | M4 | D | D | 6.08   |
| 1  | 12202548  | 12202548  | TNFRSF8  | tumor necrosis factor recepto    | NM_001243.4    | G | A | nonsynonymous SNV | G1748A  | G583E  | M4 | D | D | 5.51   |
| 1  | 144879542 | 144879542 | PDE4DIP  | phosphodiesterase 4D intera      | NM_014644.5    | A | G | nonsynonymous SNV | T3908C  | L1303P | M4 | T | B | 2.15   |
| 1  | 150958836 | 150958836 | ANXA9    | annexin A9                       | NM_003568      | A | G | nonsynonymous SNV | A497G   | D166G  | M4 | D | D | 5.1    |
| 1  | 151372145 | 151372145 | PSMB4    | proteasome (prosome, macr        | NM_002796      | C | T | nonsynonymous SNV | C82T    | P28S   | M4 | T | B | 0.222  |
| 1  | 151497202 | 151497202 | CGN      | cingulin                         | NM_020770      | G | A | nonsynonymous SNV | G1454A  | R485Q  | M4 | D | B | 3.95   |
| 1  | 152081921 | 152081921 | TCHH     | trichohyalin                     | NM_007113      | G | C | nonsynonymous SNV | C3772G  | L1258V | M4 | T | B | 3.14   |
| 1  | 152129087 | 152129087 | RPTN     | repetin                          | NM_001122965   | T | C | nonsynonymous SNV | A488G   | K163R  | M4 | T | B | -4.06  |
| 1  | 152186699 | 152186699 | HRNR     | hornerin                         | NM_001009931   | T | A | nonsynonymous SNV | A7406T  | Q2469L | M4 | T | P | 1.18   |
| 1  | 152186766 | 152186766 | HRNR     | hornerin                         | NM_001009931   | G | A | nonsynonymous SNV | G7339T  | R2447C | M4 | T | B | -4.42  |
| 1  | 152187935 | 152187935 | HRNR     | hornerin                         | NM_001009931   | C | T | nonsynonymous SNV | G6170A  | R2057Q | M4 | T | B | -2.34  |
| 1  | 152187945 | 152187945 | HRNR     | hornerin                         | NM_001009931   | C | T | nonsynonymous SNV | G6160A  | G2054S | M4 | T | B | -8.59  |
| 1  | 152188176 | 152188176 | HRNR     | hornerin                         | NM_001009931   | G | A | nonsynonymous SNV | C5929T  | R1977C | M4 | T | P | -1.91  |
| 1  | 152191709 | 152191709 | HRNR     | hornerin                         | NM_001009931   | C | G | nonsynonymous SNV | G2396C  | S799T  | M4 | T | B | 2.17   |



|    |           |           |          |                                  |                |   |   |                   |         |        |    |   |   |        |
|----|-----------|-----------|----------|----------------------------------|----------------|---|---|-------------------|---------|--------|----|---|---|--------|
| 1  | 152192114 | 152192114 | HRNR     | hornerin                         | NM_001009931   | C | T | nonsynonymous SNV | G1991A  | R664Q  | M4 | T | B | -3.67  |
| 1  | 152192631 | 152192631 | HRNR     | hornerin                         | NM_001009931   | C | T | nonsynonymous SNV | G1474A  | G492R  | M4 | T | B | -3.36  |
| 1  | 152193286 | 152193286 | HRNR     | hornerin                         | NM_001009931   | G | T | nonsynonymous SNV | C819A   | H273Q  | M4 | T | B | -8.81  |
| 1  | 152193851 | 152193851 | HRNR     | hornerin                         | NM_001009931   | C | T | nonsynonymous SNV | G254A   | R85H   | M4 | T | B | 0.954  |
| 1  | 152281639 | 152281639 | FLG      | filaggrin                        | NM_002016      | G | A | nonsynonymous SNV | C5723T  | P1908L | M4 | D | P | 1.84   |
| 1  | 15392193  | 15392193  | KAZN     | kazrin, periplakin interacting   | NM_201628      | C | T | nonsynonymous SNV | C1166T  | S389F  | M4 | D | D | 5.27   |
| 1  | 156642239 | 156642239 | NES      | nestin                           | NM_006617      | C | T | nonsynonymous SNV | G1741A  | E581K  | M4 | D | B | 4.28   |
| 1  | 158368846 | 158368846 | OR10T2   | olfactory receptor, family 10,   | NM_001004475   | T | C | nonsynonymous SNV | A411G   | I137M  | M4 | T | B | 2.64   |
| 1  | 158435686 | 158435686 | OR10K1   | olfactory receptor, family 10,   | NM_001004473   | C | T | nonsynonymous SNV | C335T   | S112F  | M4 | D | D | 4.5    |
| 1  | 16534022  | 16534022  | ARHGEF19 | Rho guanine nucleotide exch      | NM_153213      | A | G | nonsynonymous SNV | T869C   | L290P  | M4 | T | B | 4.9    |
| 1  | 1685785   | 1685785   | NADK     | NAD kinase                       | NM_023018.4    | G | A | nonsynonymous SNV | C881T   | S294F  | M4 | D | D | 5.66   |
| 1  | 169390783 | 169390783 | CCDC181  | coiled-coil domain containing    | NM_001300968.1 | G | A | nonsynonymous SNV | C886T   | L296F  | M4 | D | B | -3.33  |
| 1  | 175092674 | 175092674 | TNN      | tenascin N                       | NM_022093      | C | T | nonsynonymous SNV | C2789T  | P930L  | M4 | T | P | 3.1    |
| 1  | 17668609  | 17668609  | PADI4    | peptidyl arginine deiminase,     | NM_012387      | C | T | nonsynonymous SNV | C824T   | S275F  | M4 | D | P | 4.63   |
| 1  | 177909791 | 177909791 | SEC16B   | SEC16 homolog B, endoplas        | NM_033127      | C | T | nonsynonymous SNV | G2081A  | R694K  | M4 | T | B | -2.19  |
| 1  | 183616926 | 183616926 | APOBEC4  | apolipoprotein B mRNA editin     | NM_203454      | T | C | nonsynonymous SNV | A991G   | K331E  | M4 | T | B | -0.467 |
| 1  | 18808056  | 18808056  | KLHDC7A  | kelch domain containing 7A       | NM_152375      | G | C | nonsynonymous SNV | G581C   | R194P  | M4 | T | B | 0.453  |
| 1  | 19465666  | 19465666  | UBR4     | ubiquitin protein ligase E3 coi  | NM_020765      | G | A | nonsynonymous SNV | C8642T  | T2881I | M4 | D | D | 5.96   |
| 1  | 198671531 | 198671531 | PTPRC    | protein tyrosine phosphatase     | NM_002838      | G | A | nonsynonymous SNV | G455A   | R152K  | M4 | T | B | 1.33   |
| 1  | 205890942 | 205890942 | SLC26A9  | solute carrier family 26 (anior  | NM_052934.3    | C | T | nonsynonymous SNV | G1807A  | E603K  | M4 | T | B | 4.23   |
| 1  | 209950760 | 209950760 | TRAF3IP3 | TRAF3 interacting protein 3      | NM_025228.3    | C | G | nonsynonymous SNV | C1117G  | Q373E  | M4 | T | B | 5.56   |
| 1  | 21024901  | 21024901  | KIF17    | kinesin family member 17         | NM_020816.3    | C | T | nonsynonymous SNV | G1204A  | V402M  | M4 | T | B | 2.87   |
| 1  | 216348764 | 216348764 | USH2A    | Usher syndrome 2A (autosom       | NM_006933      | C | T | nonsynonymous SNV | G4457A  | R1486K | M4 | T | B | -2.24  |
| 1  | 22456342  | 22456342  | WNT4     | wingless-type MMTV integrat      | NM_030761      | T | G | nonsynonymous SNV | A80C    | Y27S   | M4 | T | B | 5.22   |
| 1  | 22555602  | 22555602  | DNAH14   | dynein, axonemal, heavy cha      | NM_001373      | T | G | nonsynonymous SNV | T11907G | N3969K | M4 | T | B | -10.1  |
| 1  | 227920103 | 227920103 | JMJ4     | jumonji domain containing 4      | NM_023007.2    | G | A | nonsynonymous SNV | C1382T  | A461V  | M4 | T | B | -2.14  |
| 1  | 236718620 | 236718620 | HEATR1   | HEAT repeat containing 1         | NM_018072      | T | C | nonsynonymous SNV | A5899G  | N1967D | M4 | T | B | 5.3    |
| 1  | 240370333 | 240370333 | FMN2     | formin 2                         | NM_020066      | G | A | nonsynonymous SNV | G2221A  | A741T  | M4 | D | B | 5.06   |
| 1  | 245848996 | 245848996 | KIF26B   | kinesin family member 26B        | NM_018012      | G | A | nonsynonymous SNV | G2711A  | R904Q  | M4 | T | B | 4.56   |
| 1  | 248202344 | 248202344 | OR2L2    | olfactory receptor, family 2, s  | NM_001004686   | G | C | nonsynonymous SNV | G775C   | V259L  | M4 | T | B | 1.9    |
| 1  | 248512786 | 248512786 | OR14C36  | olfactory receptor, family 14,   | NM_001001918   | C | T | nonsynonymous SNV | C710T   | S237F  | M4 | D | D | 3.91   |
| 1  | 249141516 | 249141516 | ZNF672   | zinc finger protein 672          | NM_024836      | T | G | nonsynonymous SNV | T43G    | S15A   | M4 | T | B | -6.85  |
| 1  | 33402499  | 33402499  | RNF19B   | ring finger protein 19B          | NM_153341.3    | C | T | nonsynonymous SNV | D2107A  | G703S  | M4 | T | B | 5.14   |
| 1  | 34663411  | 34663411  | C1orf94  | chromosome 1 open reading        | NM_001134734.1 | C | G | nonsynonymous SNV | C906G   | D302E  | M4 | T | B | 1.31   |
| 1  | 39879517  | 39879517  | KIAA0754 | KIAA0754                         | NM_015038      | G | A | nonsynonymous SNV | G3580A  | E1194K | M4 | T | B | 0.067  |
| 1  | 39917945  | 39917945  | MACF1    | microtubule-actin crosslinkin    | NM_012090      | G | A | nonsynonymous SNV | G14359A | E4787K | M4 | D | D | 5.98   |
| 1  | 40980559  | 40980559  | EXO5     | exonuclease 5                    | NM_022774      | G | A | nonsynonymous SNV | G343A   | D115N  | M4 | T | B | 3.65   |
| 1  | 43212926  | 43212926  | LEPRE1   | prolyl 3-hydroxylase 1           | NM_001243246.1 | G | A | nonsynonymous SNV | C2072T  | A691V  | M4 | T | B | 0      |
| 1  | 43906238  | 43906238  | SZT2     | seizure threshold 2 homolog      | NM_015284      | G | C | nonsynonymous SNV | G7154C  | R2385P | M4 | T | B | 0      |
| 1  | 46500993  | 46500993  | MAST2    | microtubule associated serin     | NM_015112      | A | G | nonsynonymous SNV | A4652G  | D1551G | M4 | T | B | 1.67   |
| 1  | 47607840  | 47607840  | CYP4A22  | cytochrome P450, family 4, s     | NM_001010969   | C | A | nonsynonymous SNV | C443A   | P148Q  | M4 | D | D | 1.7    |
| 1  | 47610065  | 47610065  | CYP4A22  | cytochrome P450, family 4, s     | NM_001010969   | A | C | nonsynonymous SNV | A827C   | K276T  | M4 | T | P | 1.51   |
| 1  | 6279370   | 6279370   | RNF207   | ring finger protein 207          | NM_007396      | G | C | nonsynonymous SNV | G1808C  | G603A  | M4 | T | B | 1.01   |
| 1  | 66384362  | 66384362  | PDE4B    | phosphodiesterase 4B, cAMF       | NM_002600.3    | G | A | nonsynonymous SNV | G125A   | G42E   | M4 | T | B | 5.6    |
| 1  | 75622666  | 75622666  | LHX8     | LIM homeobox 8                   | NM_001001933.1 | C | T | nonsynonymous SNV | C899T   | S300F  | M4 | D | P | 5.12   |
| 1  | 7913430   | 7913430   | UTS2     | urotensin 2                      | NM_021995      | G | A | nonsynonymous SNV | C62T    | T21M   | M4 | T | B | -3.06  |
| 1  | 85666156  | 85666156  | SYDE2    | synapse defective 1, Rho GT      | NM_032184      | T | G | nonsynonymous SNV | A524C   | Q175P  | M4 | T | B | -9.1   |
| 1  | 90180211  | 90180211  | LRRRC8C  | leucine rich repeat containin    | NM_032270      | C | A | nonsynonymous SNV | C2082A  | D694E  | M4 | T | B | 4.02   |
| 1  | 92979484  | 92979484  | EVI5     | ecotropic viral integration site | NM_005665      | G | A | nonsynonymous SNV | C2162T  | P721L  | M4 | D | B | 5.15   |
| 10 | 115409840 | 115409840 | NRAP     | nebulin-related anchoring pro    | NM_198060.3    | C | T | nonsynonymous SNV | G844A   | A282T  | M4 | T | B | 5.15   |
| 10 | 116032519 | 116032519 | VWA2     | von Willebrand factor A doma     | NM_001272046   | A | G | nonsynonymous SNV | A392G   | E131G  | M4 | T | B | 4.28   |
| 10 | 121429633 | 121429633 | BAG3     | BCL2-associated athanogen        | NM_004281      | T | C | nonsynonymous SNV | T451C   | C151R  | M4 | T | B | 0.064  |
| 10 | 15154802  | 15154802  | NMT2     | N-myristoyltransferase 2         | NM_004808      | G | T | nonsynonymous SNV | C1331A  | A444D  | M4 | D | D | 5.69   |
| 10 | 3202065   | 3202065   | PITRM1   | pitrilysin metalloprotease 1     | NM_001242307.1 | T | C | nonsynonymous SNV | A982G   | I328V  | M4 | T | B | 0.303  |
| 10 | 38121131  | 38121131  | ZNF248   | zinc finger protein 248          | NM_021045.2    | T | A | nonsynonymous SNV | A1152T  | E384D  | M4 | D | B | 0.794  |
| 10 | 47665076  | 47665076  | ANTXR1   | anthrax toxin receptor-like      | NM_001278688   | G | A | nonsynonymous SNV | G332A   | R111Q  | M4 | T | B | 0      |
| 10 | 49400730  | 49400730  | FRMPD2   | FERM and PDZ domain cont         | NM_001018071   | C | T | nonsynonymous SNV | G2162A  | R721H  | M4 | T | B | 0.934  |
| 10 | 61834170  | 61834170  | ANK3     | ankyrin 3, node of Ranvier (a    | NM_020987      | G | A | nonsynonymous SNV | C6469T  | P2157S | M4 | T | D | 6.07   |
| 10 | 70748784  | 70748784  | KIAA1279 | KIF1 Binding Protein             | NM_015634      | G | A | nonsynonymous SNV | G196A   | G66S   | M4 | T | B | -0.111 |
| 10 | 73121913  | 73121913  | SLC29A3  | solute carrier family 29 (equili | NM_018344      | A | G | nonsynonymous SNV | A976G   | I326V  | M4 | T | B | -9     |
| 10 | 75415677  | 75415677  | SYNPO2L  | synaptopodin 2-like              | NM_001114133   | C | T | nonsynonymous SNV | G4A     | G2S    | M4 | D | P | 4.53   |
| 10 | 96039597  | 96039597  | PLCE1    | phospholipase C, epsilon 1       | NM_016341.3    | G | C | nonsynonymous SNV | G4724C  | R1575P | M4 | T | B | 4.64   |
| 10 | 97983721  | 97983721  | BLNK     | B-cell linker                    | NM_013314.3    | G | C | nonsynonymous SNV | C386G   | S129C  | M4 | T | P | 5.1    |
| 10 | 99192229  | 99192229  | PGAM1    | phosphoglycerate mutase 1 (      | NM_002629      | C | T | nonsynonymous SNV | C713T   | T238M  | M4 | T | B | 0      |
| 10 | 99332223  | 99332223  | ANKRD2   | ankyrin repeat domain 2 (stre    | NM_001291218.1 | C | G | nonsynonymous SNV | C17G    | P6R    | M4 | T | B | 0      |
| 11 | 104869708 | 104869708 | CASP5    | caspase 5, apoptosis-related     | NM_004347.3    | G | C | nonsynonymous SNV | C1000G  | L334V  | M4 | T | B | -4.68  |
| 11 | 109294657 | 109294657 | C11orf87 | chromosome 11 open reading       | NM_207645      | G | A | nonsynonymous SNV | G298A   | E100K  | M4 | D | D | 4.92   |

|    |           |           |          |                                  |                |   |   |                   |        |        |    |   |   |  |  |  |  |   |        |
|----|-----------|-----------|----------|----------------------------------|----------------|---|---|-------------------|--------|--------|----|---|---|--|--|--|--|---|--------|
| 11 | 11374269  | 11374269  | CSNK2A3  | casein kinase 2, alpha 3 poly    | NM_001256686   | A | G | nonsynonymous SNV | T398C  | I133T  | M4 |   |   |  |  |  |  |   |        |
| 11 | 116691675 | 116691675 | APOA4    | apolipoprotein A-IV              | NM_000482      | T | A | nonsynonymous SNV | A1099T | T367S  | M4 | T | B |  |  |  |  |   | 0.012  |
| 11 | 117864063 | 117864063 | IL10RA   | interleukin 10 receptor, alpha   | NM_001558      | A | G | nonsynonymous SNV | A475G  | S159G  | M4 | T | B |  |  |  |  |   | 2.05   |
| 11 | 118221350 | 118221350 | CD3G     | CD3g molecule, gamma (CD)        | NM_000073      | G | T | nonsynonymous SNV | G391T  | V131F  | M4 | T | B |  |  |  |  |   | 1.63   |
| 11 | 119005132 | 119005132 | HINFP    | histone H4 transcription facto   | NM_015517.4    | C | T | nonsynonymous SNV | C1478T | A493V  | M4 | T | B |  |  |  |  |   | -0.697 |
| 11 | 123777497 | 123777497 | OR8D4    | olfactory receptor, family 8, si | NM_001005197   | G | A | nonsynonymous SNV | G359A  | C120Y  | M4 | T | B |  |  |  |  |   | 4.66   |
| 11 | 123848121 | 123848121 | OR10S1   | olfactory receptor, family 10, i | NM_001004474   | T | C | nonsynonymous SNV | A278G  | K93R   | M4 | T | P |  |  |  |  |   | 3.69   |
| 11 | 123848212 | 123848212 | OR10S1   | olfactory receptor, family 10, i | NM_001004474   | C | T | nonsynonymous SNV | G187A  | G63S   | M4 | T | B |  |  |  |  |   | 1.9    |
| 11 | 123901192 | 123901192 | OR10G8   | olfactory receptor, family 10, i | NM_001004464   | C | T | nonsynonymous SNV | C863T  | T288I  | M4 | D | D |  |  |  |  |   | 2.91   |
| 11 | 124095525 | 124095525 | OR8G2    | olfactory receptor, family 8, si | NM_001291438   | T | C | nonsynonymous SNV | T128C  | L43P   | M4 |   |   |  |  |  |  |   |        |
| 11 | 124095647 | 124095647 | OR8G2    | olfactory receptor, family 8, si | NM_001291438   | A | C | nonsynonymous SNV | A250C  | I84L   | M4 |   |   |  |  |  |  |   |        |
| 11 | 126162843 | 126162843 | TIRAP    | toll-interleukin 1 receptor (TIF | NM_148910.2    | C | C | nonsynonymous SNV | C539T  | S180L  | M4 |   | B |  |  |  |  |   | 4.71   |
| 11 | 1264691   | 1264691   | MUC5B    | mucin 5B, oligomeric mucus/i     | NM_002458      | T | C | nonsynonymous SNV | T6581C | M2194T | M4 | D | B |  |  |  |  |   | -4.47  |
| 11 | 1265375   | 1265375   | MUC5B    | mucin 5B, oligomeric mucus/i     | NM_002458      | C | T | nonsynonymous SNV | C7265T | S2422F | M4 | D | B |  |  |  |  |   | 1.28   |
| 11 | 1265987   | 1265987   | MUC5B    | mucin 5B, oligomeric mucus/i     | NM_002458      | C | G | nonsynonymous SNV | C7877G | T2626R | M4 | D | P |  |  |  |  |   | 0.116  |
| 11 | 18955941  | 18955941  | MRGPRX1  | MAS-related GPR, member X        | NM_147199      | G | T | nonsynonymous SNV | C391A  | R131S  | M4 | T | D |  |  |  |  |   | 2.28   |
| 11 | 4608542   | 4608542   | OR52I2   | olfactory receptor, family 52, i | NM_001005170   | C | T | nonsynonymous SNV | S500T  | T167M  | M4 | D | D |  |  |  |  |   | 3.26   |
| 11 | 4928841   | 4928841   | OR51A7   | olfactory receptor, family 51, i | NM_001004749   | T | C | nonsynonymous SNV | T242C  | M81T   | M4 | T | B |  |  |  |  |   | 3.86   |
| 11 | 4976291   | 4976291   | OR51A2   | olfactory receptor, family 51, i | NM_001004748   | G | A | nonsynonymous SNV | C653T  | S218F  | M4 | D | B |  |  |  |  |   | 3.13   |
| 11 | 5173149   | 5173149   | OR52A1   | olfactory receptor, family 52, i | NM_012375      | C | A | nonsynonymous SNV | G451T  | V151L  | M4 | T | B |  |  |  |  |   | -4.13  |
| 11 | 5247947   | 5247947   | HBB      | hemoglobin, beta                 | NM_000518      | G | A | nonsynonymous SNV | C175T  | P59S   | M4 | D | B |  |  |  |  |   | -8.5   |
| 11 | 55035837  | 55035837  | TRIM48   | tripartite motif containing 48   | NM_024114      | C | A | nonsynonymous SNV | C567A  | D189E  | M4 | T | B |  |  |  |  |   | 0      |
| 11 | 56128474  | 56128474  | OR8J1    | olfactory receptor, family 8, si | NM_001005205   | T | G | nonsynonymous SNV | T752G  | F251C  | M4 | D | D |  |  |  |  |   | 3.9    |
| 11 | 56185327  | 56185327  | OR5R1    | olfactory receptor, family 5, si | NM_001004744   | T | C | nonsynonymous SNV | A382G  | S128G  | M4 | D | B |  |  |  |  |   | 4.66   |
| 11 | 5863013   | 5863013   | OR52E6   | olfactory receptor, family 52, i | NM_001005167   | T | C | nonsynonymous SNV | A115G  | I39V   | M4 | T | B |  |  |  |  |   | -3.21  |
| 11 | 61032665  | 61032665  | VWCE     | von Willebrand factor C and E    | NM_152718      | G | A | nonsynonymous SNV | C1985T | S662F  | M4 | T | D |  |  |  |  |   | 4.88   |
| 11 | 62520035  | 62520035  | ZBTB3    | zinc finger and BTB domain c     | NM_024784      | C | T | nonsynonymous SNV | G1252A | D418N  | M4 | T | B |  |  |  |  |   | 4.51   |
| 11 | 64116842  | 64116842  | CCDC88B  | coiled-coil domain containing    | NM_032251      | G | T | nonsynonymous SNV | G2656T | D886Y  | M4 | D | B |  |  |  |  |   | 1.69   |
| 11 | 64453213  | 64453213  | NRXN2    | neurexin 2                       | NM_015080.3    | C | T | nonsynonymous SNV | G1057A | G353S  | M4 | T | D |  |  |  |  |   | 4      |
| 11 | 64981837  | 64981837  | SLC22A20 | solute carrier family 22, mem    | NM_001004326   | C | T | nonsynonymous SNV | C422T  | A141V  | M4 |   |   |  |  |  |  |   |        |
| 11 | 65629934  | 65629934  | MUS81    | MUS81 structure-specific enc     | NM_025128      | G | C | nonsynonymous SNV | G539C  | R180P  | M4 | T | B |  |  |  |  |   | -1.98  |
| 11 | 67288594  | 67288594  | CABP2    | calcium binding protein 2        | NM_016366      | C | T | nonsynonymous SNV | G281A  | R94Q   | M4 | D | B |  |  |  |  |   | 3.61   |
| 11 | 74413955  | 74413955  | CHRD12   | chordin-like 2                   | NM_015424.5    | G | A | nonsynonymous SNV | C1004T | P335L  | M4 | T | D |  |  |  |  |   | 4.15   |
| 11 | 830120    | 830120    | CRACR2B  | calcium release activated cha    | NM_001286606.1 | A | G | nonsynonymous SNV | A593G  | Q198R  | M4 | T | B |  |  |  |  |   | 3.27   |
| 11 | 8751889   | 8751889   | ST5      | suppression of tumorigenicity    | NM_005418.3    | C | G | nonsynonymous SNV | G948C  | K316N  | M4 | D | P |  |  |  |  |   | 6.17   |
| 11 | 93122196  | 93122196  | CCDC67   | coiled-coil domain containing    | NM_181645      | T | G | nonsynonymous SNV | T946G  | S316A  | M4 | T | P |  |  |  |  |   | 5.95   |
| 12 | 102591388 | 102591388 | PMCH     | pro-melanin-concentrating ho     | NM_002674      | G | A | nonsynonymous SNV | C161T  | A54V   | M4 | T | B |  |  |  |  |   | 2.99   |
| 12 | 10275922  | 10275922  | CLEC7A   | C-type lectin domain family 7    | NM_197947.2    | G | A | nonsynonymous SNV | S533T  | S178L  | M4 | T | D |  |  |  |  |   | 4.34   |
| 12 | 109017898 | 109017898 | SELP1G   | selectin P ligand                | NM_001206609.1 | C | T | nonsynonymous SNV | G234A  | M78I   | M4 | T | B |  |  |  |  |   | -1.84  |
| 12 | 114380167 | 114380167 | RBM19    | RNA binding motif protein 19     | NM_001146699.1 | G | A | nonsynonymous SNV | C1699T | L567F  | M4 | T | D |  |  |  |  |   | 4.48   |
| 12 | 11545921  | 11545921  | PRB2     | proline-rich protein BstNI sub   | NM_006248      | C | T | nonsynonymous SNV | G1091A | G364E  | M4 | T |   |  |  |  |  | P | 1.46   |
| 12 | 121175678 | 121175678 | ACADS    | acyl-CoA dehydrogenase, C-       | NM_000017      | C | T | nonsynonymous SNV | C511T  | R171W  | M4 | D | P |  |  |  |  |   | 2.1    |
| 12 | 126003996 | 126003996 | TMEM132B | transmembrane protein 132B       | NM_052907      | C | T | nonsynonymous SNV | C1103T | S368F  | M4 | T | D |  |  |  |  |   | 4.94   |
| 12 | 128899781 | 128899781 | TMEM132C | transmembrane protein 132C       | NM_001136103   | A | C | nonsynonymous SNV | A590C  | E197A  | M4 | T | P |  |  |  |  |   | 3.93   |
| 12 | 133252086 | 133252086 | POLE     | polymerase (DNA directed), ε     | NM_006231      | C | T | nonsynonymous SNV | G1124A | R375Q  | M4 | D | D |  |  |  |  |   | 5.91   |
| 12 | 133502439 | 133502439 | ZNF605   | zinc finger protein 605          | NM_183238.3    | G | T | stopgain          | C1446A | C482X  | M4 | T |   |  |  |  |  |   | 0.608  |
| 12 | 133780878 | 133780878 | ZNF268   | zinc finger protein 268          | NM_003415.2    | G | A | nonsynonymous SNV | G2606A | C482X  | M4 |   | B |  |  |  |  |   | 3.4    |
| 12 | 22659723  | 22659723  | C2CD5    | C2 calcium-dependent domai       | NM_001286176.1 | G | A | nonsynonymous SNV | C1069T | P357S  | M4 | D | D |  |  |  |  |   | 5.25   |
| 12 | 2794921   | 2794921   | CACNA1C  | calcium channel, voltage-dep     | NM_199460.3    | G | A | nonsynonymous SNV | G5842A | E1948K | M4 | T | D |  |  |  |  |   | 3.35   |
| 12 | 2794937   | 2794937   | CACNA1C  | calcium channel, voltage-dep     | NM_199460.3    | C | T | nonsynonymous SNV | C5858T | T1953M | M4 | T | P |  |  |  |  |   | 4.26   |
| 12 | 30877346  | 30877346  | CAPRN12  | caprin family member 2           | NM_001002259.2 | G | A | nonsynonymous SNV | C1945T | P649S  | M4 | T | B |  |  |  |  |   | 3.27   |
| 12 | 32134064  | 32134064  | KIAA1551 | KIAA1551                         | NM_018169      | A | G | nonsynonymous SNV | A175G  | I59V   | M4 |   | B |  |  |  |  |   | -2.22  |
| 12 | 39752071  | 39752071  | KIF21A   | kinesin family member 21A        | NM_001173464.1 | A | C | nonsynonymous SNV | T1124G | V375G  | M4 | D | D |  |  |  |  |   | 4.33   |
| 12 | 48723595  | 48723595  | H1FNT    | H1 histone family, member N      | NM_181788      | G | A | nonsynonymous SNV | G521A  | R174Q  | M4 | T | B |  |  |  |  |   | -1.27  |
| 12 | 48921837  | 48921837  | OR8S1    | olfactory receptor, family 8, si | NM_001005203   | G | A | nonsynonymous SNV | G1031A | G344E  | M4 | D | D |  |  |  |  |   | 0.158  |
| 12 | 49724412  | 49724412  | TROAP    | trophinin associated protein     | NM_005480      | T | G | nonsynonymous SNV | T1784G | I595S  | M4 | T | B |  |  |  |  |   | 0.336  |
| 12 | 50188714  | 50188714  | NCKAP5L  | NCK-associated protein 5-like    | NM_001037806   | C | T | nonsynonymous SNV | G2929A | D977N  | M4 | T | D |  |  |  |  |   | 5.23   |
| 12 | 50189475  | 50189475  | NCKAP5L  | NCK-associated protein 5-like    | NM_001037806   | C | G | nonsynonymous SNV | G2168C | G723A  | M4 | T | B |  |  |  |  |   | 2.75   |
| 12 | 51069183  | 51069183  | DIP2B    | disco-interacting protein 2 ho   | NM_173602      | C | T | nonsynonymous SNV | C868T  | P290S  | M4 | D | D |  |  |  |  |   | 5.03   |
| 12 | 52710721  | 52710721  | KRT83    | keratin 83, type II              | NM_002282      | G | C | nonsynonymous SNV | C837G  | I279M  | M4 | D | P |  |  |  |  |   | -0.295 |
| 12 | 52713088  | 52713088  | KRT83    | keratin 83, type II              | NM_002282      | G | A | nonsynonymous SNV | C445T  | R149C  | M4 | D | B |  |  |  |  |   | 4.39   |
| 12 | 53167395  | 53167395  | KRT76    | keratin 76, type II              | NM_015848      | C | T | nonsynonymous SNV | G847A  | A283T  | M4 | D | D |  |  |  |  |   | 4.48   |
| 12 | 54757512  | 54757512  | GPR84    | G protein-coupled receptor 84    | NM_020370      | G | T | nonsynonymous SNV | C124A  | L42I   | M4 | T | B |  |  |  |  |   | 3.93   |
| 12 | 55794703  | 55794703  | OR6C65   | olfactory receptor, family 6, si | NM_001005518   | A | G | nonsynonymous SNV | A391G  | T131A  | M4 | T | B |  |  |  |  |   | 2.36   |
| 12 | 56846903  | 56846903  | MIP      | major intrinsic protein of lens  | NM_012064      | G | A | nonsynonymous SNV | C559T  | R187C  | M4 | D | D |  |  |  |  |   | 4.96   |
| 12 | 58190185  | 58190185  | TSMF     | Ts translation elongation fact   | NM_001172696.1 | T | A | nonsynonymous SNV | T860A  | L287H  | M4 | T | P |  |  |  |  |   | 5.42   |
| 12 | 6172202   | 6172202   | VWF      | von Willebrand factor            | NM_000552      | T | A | nonsynonymous SNV | A1451G | H484R  | M4 | T | B |  |  |  |  |   | 1.25   |

|    |           |           |          |                                                           |                |   |   |                   |         |        |    |   |   |        |
|----|-----------|-----------|----------|-----------------------------------------------------------|----------------|---|---|-------------------|---------|--------|----|---|---|--------|
| 12 | 7842932   | 7842932   | GDF3     | growth differentiation factor 3                           | NM_020634      | C | T | nonsynonymous SNV | G637A   | G213R  | M4 | T | B | 1.64   |
| 12 | 863152    | 863152    | WNK1     | WNK lysine deficient protein                              | NM_018979.3    | G | A | nonsynonymous SNV | G421A   | A141T  | M4 | T | B | 4.35   |
| 12 | 93100895  | 93100895  | C12orf74 | chromosome 12 open reading frame                          | NM_001178097.2 | T | A | nonsynonymous SNV | T488A   | L163Q  | M4 | T | B | -0.926 |
| 12 | 9317784   | 9317784   | PZP      | pregnancy-zone protein                                    | NM_002864      | A | G | nonsynonymous SNV | T2438C  | V813A  | M4 | T | B | -0.929 |
| 13 | 46170870  | 46170870  | ERIC6B   | glutamate-rich 6B                                         | NM_182542      | G | T | nonsynonymous SNV | C271A   | H91N   | M4 | D | B | -5.63  |
| 14 | 105408811 | 105408811 | AHNAK2   | AHNAK nucleoprotein 2                                     | NM_138420      | A | G | nonsynonymous SNV | T12977C | L4326P | M4 | T | B | 1.41   |
| 14 | 105408827 | 105408827 | AHNAK2   | AHNAK nucleoprotein 2                                     | NM_138420      | A | C | nonsynonymous SNV | T12961G | L4321V | M4 | T | B | -6.62  |
| 14 | 105408955 | 105408955 | AHNAK2   | AHNAK nucleoprotein 2                                     | NM_138420      | A | G | nonsynonymous SNV | T12833C | V4278A | M4 | T | B | -0.353 |
| 14 | 105410411 | 105410411 | AHNAK2   | AHNAK nucleoprotein 2                                     | NM_138420      | C | T | nonsynonymous SNV | G11377A | D3793N | M4 | T | B | 1.37   |
| 14 | 92126184  | 92126184  | CATSPERB | catsper channel auxiliary subunit                         | NM_024764      | C | T | nonsynonymous SNV | G1429A  | A477T  | M4 | T | D | 4.76   |
| 14 | 96777468  | 96777468  | ATG2B    | autophagy related 2B                                      | NM_018036      | G | C | nonsynonymous SNV | C4147G  | Q1383E | M4 | T | B | 2.55   |
| 15 | 22382897  | 22382897  | OR4N4    | olfactory receptor, family 4, subfamily 4                 | NM_001005241   | A | G | nonsynonymous SNV | A425G   | Y142C  | M4 | T | B | 3.37   |
| 15 | 45968435  | 45968435  | SQRDL    | sulfide quinone reductase-like                            | NM_021199.3    | T | C | nonsynonymous SNV | T791C   | I264T  | M4 | T | B | 4.62   |
| 15 | 55477605  | 55477605  | RSL24D1  | ribosomal L24 domain containing                           | NM_016304      | A | G | nonsynonymous SNV | T287C   | V96A   | M4 | D | B | 5.05   |
| 15 | 79189365  | 79189365  | MORF4L1  | mortality factor 4 like 1                                 | NM_006791.3    | G | A | nonsynonymous SNV | G928A   | D310N  | M4 | T | B | 4.77   |
| 15 | 89401397  | 89401397  | ACAN     | aggregran                                                 | NM_013227.3    | G | A | nonsynonymous SNV | G5581A  | G1861R | M4 | T | P | 5.56   |
| 16 | 10769958  | 10769958  | TEKT5    | tektin 5                                                  | NM_144674      | T | C | nonsynonymous SNV | A944G   | Q315R  | M4 | T | B | 2.67   |
| 16 | 15178499  | 15178499  | RRN3     | RRN3 homolog, RNA polymerase III                          | NM_018427.4    | G | A | nonsynonymous SNV | C596T   | S199L  | M4 | T | B | 3.86   |
| 16 | 21209105  | 21209105  | ZP2      | zona pellucida glycoprotein 2                             | NM_003460.2    | C | T | nonsynonymous SNV | G2077A  | E693K  | M4 | D | B | -1.38  |
| 16 | 3165425   | 3165425   | ZNF205   | zinc finger protein 205                                   | NM_003456.2    | A | G | nonsynonymous SNV | A127G   | T43A   | M4 | T | B | -9.4   |
| 16 | 31927613  | 31927613  | ZNF267   | zinc finger protein 267                                   | NM_003414.5    | A | T | nonsynonymous SNV | A2043T  | R681S  | M4 | D | B | 0.468  |
| 16 | 31927643  | 31927643  | ZNF267   | zinc finger protein 267                                   | NM_003414.5    | T | A | nonsynonymous SNV | T2073A  | D691E  | M4 | T | B | -0.935 |
| 16 | 334543    | 334543    | PDIA2    | protein disulfide isomerase family 2 class A member 2     | NM_006849      | C | G | nonsynonymous SNV | C356G   | T119R  | M4 | D | D | 3.17   |
| 16 | 420140    | 420140    | MRPL28   | mitochondrial ribosomal protein L28                       | NM_006428      | G | A | nonsynonymous SNV | C79T    | H27Y   | M4 | T | D | 4.71   |
| 16 | 4933939   | 4933939   | PPL      | periplakin                                                | NM_002705      | G | C | nonsynonymous SNV | C4717G  | Q1573E | M4 | T | D | 5.83   |
| 16 | 69727038  | 69727038  | NFAT5    | nuclear factor of activated T-cells 5                     | NM_138714.3    | C | C | stopgain          | C3028T  | A591S  | M4 | D |   | 5.83   |
| 16 | 88808743  | 88808743  | PIEZO1   | piezo-type mechanosensitive ion channel                   | NM_001142864   | A | G | nonsynonymous SNV | T248C   | I83T   | M4 | T | B | 4.37   |
| 17 | 3336703   | 3336703   | OR1E2    | olfactory receptor, family 1, subfamily 2                 | NM_003554      | T | C | nonsynonymous SNV | A433G   | M145V  | M4 | D | D | 4.39   |
| 17 | 38911327  | 38911327  | KRT25    | keratin 25, type I                                        | NM_181534      | C | G | nonsynonymous SNV | G197C   | G66A   | M4 | T | B | 4.74   |
| 17 | 40860071  | 40860071  | EZH1     | enhancer of zeste 1 polycomb target 1                     | NM_001991      | T | A | nonsynonymous SNV | A1565T  | Q522L  | M4 | T | D | 5.49   |
| 17 | 7414585   | 7414585   | POLR2A   | polymerase (RNA) II (DNA directed)                        | NM_000937      | G | A | nonsynonymous SNV | G3865A  | E1289K | M4 | D | D | 4.89   |
| 18 | 59221453  | 59221453  | CDH20    | cadherin 20, type 2                                       | NM_031891      | G | T | nonsynonymous SNV | G1931T  | R644L  | M4 | D | P | 4.86   |
| 18 | 59221485  | 59221485  | CDH20    | cadherin 20, type 2                                       | NM_031891      | G | A | nonsynonymous SNV | G1963A  | E655K  | M4 | T | P | 5.39   |
| 18 | 77728135  | 77728135  | HSBP1L1  | heat shock factor binding protein 1-like 1                | NM_001136180   | G | T | nonsynonymous SNV | G165T   | K55N   | M4 | T | B | -2.31  |
| 18 | 9886840   | 9886840   | TXNDC2   | thioredoxin domain containing 2                           | NM_032243.5    | G | T | nonsynonymous SNV | G163T   | A55S   | M4 | T | B | -5.1   |
| 19 | 11517474  | 11517474  | RGL3     | ral guanidine nucleotide dissociation inhibitor 3         | NM_01161616.2  | C | G | nonsynonymous SNV | G704A   | G235E  | M4 | T | B | -2.79  |
| 19 | 11917964  | 11917964  | ZNF491   | zinc finger protein 491                                   | NM_152356      | G | T | nonsynonymous SNV | G1196T  | R399I  | M4 | T | B | -0.814 |
| 19 | 12060786  | 12060786  | ZNF700   | zinc finger protein 700                                   | NM_001271848.1 | A | T | nonsynonymous SNV | A1956T  | E652D  | M4 | T | P | -0.438 |
| 19 | 13041287  | 13041287  | FARSA    | phenylalanyl-tRNA synthetase                              | NM_004461      | G | A | nonsynonymous SNV | C340T   | R114W  | M4 | T | B | 4.34   |
| 19 | 15281250  | 15281250  | NOTCH3   | notch 3                                                   | NM_000435      | C | T | nonsynonymous SNV | G5006A  | R1669H | M4 | D | B | 3.69   |
| 19 | 18285944  | 18285944  | IFI30    | interferon, gamma-inducible factor 30                     | NM_006332      | G | A | nonsynonymous SNV | G227A   | R76Q   | M4 | T | P | 4.22   |
| 19 | 20045247  | 20045247  | ZNF93    | zinc finger protein 93                                    | NM_031218      | T | A | nonsynonymous SNV | T1483A  | S495T  | M4 | T | B | -1.7   |
| 19 | 21300624  | 21300624  | ZNF714   | zinc finger protein 714                                   | NM_182515      | T | A | nonsynonymous SNV | T1154A  | I385K  | M4 | T | B | -2.03  |
| 19 | 21476980  | 21476980  | ZNF708   | zinc finger protein 708                                   | NM_021269.2    | C | A | nonsynonymous SNV | G788T   | R263L  | M4 | T | B | -2.1   |
| 19 | 21719658  | 21719658  | ZNF429   | zinc finger protein 429                                   | NM_001001415   | G | T | nonsynonymous SNV | G803T   | R268M  | M4 | T | B | -1.75  |
| 19 | 21720265  | 21720265  | ZNF429   | zinc finger protein 429                                   | NM_001001415   | C | A | nonsynonymous SNV | C1410A  | S470R  | M4 | T | B | -1.62  |
| 19 | 22847946  | 22847946  | ZNF492   | zinc finger protein 492                                   | NM_020855      | T | C | nonsynonymous SNV | T1475C  | L492P  | M4 | D | D | 1.06   |
| 19 | 2396611   | 2396611   | TMPRSS9  | transmembrane protease, serine/threonine kinase 9         | NM_182973      | C | T | nonsynonymous SNV | C217T   | R73W   | M4 | D | P | 2.94   |
| 19 | 2422191   | 2422191   | TMPRSS9  | transmembrane protease, serine/threonine kinase 9         | NM_182973      | G | A | nonsynonymous SNV | G2392A  | G798R  | M4 | T | B | 0.432  |
| 19 | 37367862  | 37367862  | ZNF345   | zinc finger protein 345                                   | NM_003419.4    | G | C | nonsynonymous SNV | G130C   | D44H   | M4 | T | P | 2.81   |
| 19 | 37734303  | 37734303  | ZNF383   | zinc finger protein 383                                   | NM_152604      | G | T | nonsynonymous SNV | G1165T  | A389S  | M4 | D | B | 2.58   |
| 19 | 41869392  | 41869392  | B9D2     | B9 protein domain 2                                       | NM_030578      | T | C | nonsynonymous SNV | A33G    | I11M   | M4 | T | B | -1.13  |
| 19 | 4210356   | 4210356   | ANKRD24  | ankyrin repeat domain 24                                  | NM_133475      | G | A | nonsynonymous SNV | G1046A  | R349Q  | M4 | T | B | -1.19  |
| 19 | 43097942  | 43097942  | CEACAM8  | carcinoembryonic antigen-related cell adhesion molecule 8 | NM_001816      | G | A | nonsynonymous SNV | C175T   | P59S   | M4 | T | B | 0.808  |
| 19 | 51412668  | 51412668  | KLK4     | kallikrein-related peptidase 4                            | NM_004917      | A | C | nonsynonymous SNV | T64G    | S22A   | M4 | T | B | -7.01  |
| 19 | 52658643  | 52658643  | ZNF836   | zinc finger protein 836                                   | NM_001102657   | G | A | nonsynonymous SNV | C2293T  | L765F  | M4 | D | D | 0.961  |
| 19 | 53572625  | 53572625  | ZNF160   | zinc finger protein 160                                   | NM_001102603.1 | A | T | nonsynonymous SNV | T1162A  | W388R  | M4 | T | B | -4.94  |
| 19 | 53856444  | 53856444  | ZNF845   | zinc finger protein 845                                   | NM_138374      | C | A | nonsynonymous SNV | C2516A  | T839N  | M4 | D | B | -2.93  |
| 19 | 54802554  | 54802554  | LILRA3   | leukocyte immunoglobulin-like receptor 3                  | NM_006865.4    | G | C | nonsynonymous SNV | C887G   | T296R  | M4 | T | B | -0.638 |
| 19 | 57133707  | 57133707  | ZNF71    | zinc finger protein 71                                    | NM_021216      | T | A | nonsynonymous SNV | T1052A  | V351E  | M4 | T | B | 1.28   |
| 19 | 57838018  | 57838018  | ZNF543   | zinc finger protein 543                                   | NM_213598      | C | G | nonsynonymous SNV | C163G   | P55A   | M4 | T | B | 0.225  |
| 19 | 57868483  | 57868483  | ZNF304   | zinc finger protein 304                                   | NM_001290318.1 | G | A | nonsynonymous SNV | G1387A  | A463T  | M4 | D | B | 2.96   |
| 19 | 57910591  | 57910591  | ZNF548   | zinc finger protein 548                                   | NM_001172773.1 | G | T | nonsynonymous SNV | G972T   | R324S  | M4 | T | B | -4.63  |
| 19 | 5866724   | 5866724   | FUT5     | fucosyltransferase 5 (alpha 1-3)                          | NM_002034      | G | A | nonsynonymous SNV | C1013T  | T338M  | M4 | T | B | 0.912  |
| 19 | 5867177   | 5867177   | FUT5     | fucosyltransferase 5 (alpha 1-3)                          | NM_002034      | G | A | nonsynonymous SNV | C560T   | P187L  | M4 | T | P | 1.25   |
| 19 | 7810697   | 7810697   | CD209    | CD209 molecule                                            | NM_021155.3    | C | A | nonsynonymous SNV | G455T   | W152L  | M4 | T | B | -2.22  |
| 19 | 7810759   | 7810759   | CD209    | CD209 molecule                                            | NM_021155.3    | C | A | nonsynonymous SNV | G393T   | K131N  | M4 | T | D | -0.018 |

|    |           |           |           |                                 |                |   |   |                   |         |         |    |   |   |   |   |  |        |
|----|-----------|-----------|-----------|---------------------------------|----------------|---|---|-------------------|---------|---------|----|---|---|---|---|--|--------|
| 19 | 7810776   | 7810776   | CD209     | CD209 molecule                  | NM_021155.3    | C | A | stopgain          | G376T   | E126X   | M4 | T |   |   |   |  | -2.75  |
| 19 | 9070402   | 9070402   | MUC16     | mucin 16, cell surface associ   | NM_024690      | G | T | nonsynonymous SNV | C17044A | P5682T  | M4 | D | P |   |   |  | -2.48  |
| 2  | 101670689 | 101670689 | TBC1D8    | TBC1 domain family, membe       | NM_001102426   | G | A | nonsynonymous SNV | C467T   | A156V   | M4 | T | P |   |   |  | 5.78   |
| 2  | 109382873 | 109382873 | RANBP2    | RAN binding protein 2           | NM_006267      | C | T | stopgain          | C5878T  | Q1960X  | M4 | T |   |   |   |  | 4.86   |
| 2  | 11597313  | 11597313  | E2F6      | E2F transcription factor 6      | NM_198256.3    | G | A | nonsynonymous SNV | C155T   | S52F    | M4 | D | P |   |   |  | 5.08   |
| 2  | 119739929 | 119739929 | MARCO     | macrophage receptor with co     | NM_006770      | C | T | nonsynonymous SNV | C1006T  | P336S   | M4 | T |   | 0 | B |  | 4.07   |
| 2  | 1241772   | 1241772   | SNTG2     | syntrophin, gamma 2             | NM_018968      | G | A | nonsynonymous SNV | G832A   | E278K   | M4 | T | B |   |   |  | 0.28   |
| 2  | 128379563 | 128379563 | MYO7B     | myosin VIIIB                    | NM_001080527   | C | G | nonsynonymous SNV | C3454G  | L1152V  | M4 | T | P |   |   |  | 3.03   |
| 2  | 130899915 | 130899915 | CCDC74B   | coiled-coil domain containi     | NM_207310      | G | A | nonsynonymous SNV | C335T   | P112L   | M4 | T | B |   |   |  | 0.912  |
| 2  | 135893372 | 135893372 | RAB3GAP1  | RAB3 GTPase activating prot     | NM_001172435.1 | A | G | nonsynonymous SNV | A1793G  | N598S   | M4 | T | B |   |   |  | 4.26   |
| 2  | 141812777 | 141812777 | LRP1B     | low density lipoprotein recept  | NM_018557      | G | A | nonsynonymous SNV | C1460T  | S487L   | M4 | D | P |   |   |  | 5.45   |
| 2  | 149227700 | 149227700 | MBD5      | methyl-CpG binding domain f     | NM_018328      | T | A | nonsynonymous SNV | T2188A  | L730M   | M4 | T | P |   |   |  | 4.96   |
| 2  | 155711314 | 155711314 | KCNJ3     | potassium channel, inwardly     | NM_002239      | C | T | nonsynonymous SNV | C995T   | S332F   | M4 | T | B |   |   |  | 5.7    |
| 2  | 168107798 | 168107798 | XIRP2     | xin actin binding repeat conta  | NM_152381.5    | T | C | nonsynonymous SNV | T9896C  | V3299A  | M4 | T | D |   |   |  | 5.45   |
| 2  | 170857815 | 170857815 | UBR3      | ubiquitin protein ligase E3 coi | NM_172070      | G | T | nonsynonymous SNV | G3920T  | S1307I  | M4 | T | D |   |   |  | 5.05   |
| 2  | 174081896 | 174081896 | ZAK       | sterile alpha motif and leucine | NM_016653.2    | G | A | nonsynonymous SNV | G905A   | S302N   | M4 | T | D |   |   |  | 5.59   |
| 2  | 17696870  | 17696870  | RAD51AP2  | RAD51 associated protein 2      | NM_001099218   | C | T | nonsynonymous SNV | G2813A  | G938E   | M4 | T | P |   |   |  | 2.46   |
| 2  | 179425090 | 179425090 | TTN       | titin                           | NM_001267550   | C | T | nonsynonymous SNV | G85769A | R28590Q | M4 | D | D |   |   |  | 5.88   |
| 2  | 179429821 | 179429821 | TTN       | titin                           | NM_001267550   | C | T | nonsynonymous SNV | G81038A | R27013Q | M4 | D | B |   |   |  | 5      |
| 2  | 179611941 | 179611941 | TTN       | titin                           | NM_133379      | G | T | stopgain          | C15186A | Y5062X  | M4 | T |   |   |   |  | -8     |
| 2  | 197541385 | 197541385 | CCDC150   | coiled-coil domain containing   | NM_001080539   | G | A | nonsynonymous SNV | G1370A  | R457Q   | M4 | T | B |   |   |  | -0.936 |
| 2  | 207824384 | 207824384 | CPO       | carboxypeptidase O              | NM_173077      | T | G | nonsynonymous SNV | T402G   | S134R   | M4 | T | B |   |   |  | 1.12   |
| 2  | 21228827  | 21228827  | APOB      | apolipoprotein B                | NM_000384      | C | T | nonsynonymous SNV | G10913A | R3638Q  | M4 | T | B |   |   |  | 3.24   |
| 2  | 21235019  | 21235019  | APOB      | apolipoprotein B                | NM_000384      | G | T | nonsynonymous SNV | C4721A  | T1574N  | M4 | D | B |   |   |  | 4.03   |
| 2  | 216190020 | 216190020 | ATIC      | 5-aminoimidazole-4-carboxar     | NM_004044      | C | G | nonsynonymous SNV | C347G   | T116S   | M4 | T | B |   |   |  | 5.87   |
| 2  | 220039825 | 220039825 | CNPPD1    | cyclin Pas1/PHO80 domain c      | NM_015680      | G | C | nonsynonymous SNV | C266A   | A89E    | M4 | D | D |   |   |  | 4.43   |
| 2  | 220284876 | 220284876 | DES       | desmin                          | NM_001927      | C | T | nonsynonymous SNV | C638T   | A213V   | M4 | D | B |   |   |  | 3.67   |
| 2  | 228243905 | 228243905 | TM4SF20   | transmembrane 4 L six family    | NM_024795      | G | A | nonsynonymous SNV | C80T    | A27V    | M4 | T | B |   |   |  | 1.78   |
| 2  | 242573211 | 242573211 | THAP4     | THAP domain containing 4        | NM_015963      | T | C | nonsynonymous SNV | A361G   | S121G   | M4 | T | B |   |   |  | -1.86  |
| 2  | 242674803 | 242674803 | D2HGDH    | D-2-hydroxyglutarate dehydr     | NM_152783      | G | A | nonsynonymous SNV | G164A   | R55Q    | M4 | T | B |   |   |  | -6.41  |
| 2  | 24431184  | 24431184  | ITSN2     | intersectin 2                   | NM_006277.2    | C | A | nonsynonymous SNV | G4600A  | A1534T  | M4 | T | D |   |   |  | 4.86   |
| 2  | 25022598  | 25022598  | CENPO     | centromere protein O            | NM_024322.2    | A | G | nonsynonymous SNV | A101G   | Q34R    | M4 | T | B |   |   |  | -3.63  |
| 2  | 25141538  | 25141538  | ADCY3     | adenylate cyclase 3             | NM_004036      | A | G | nonsynonymous SNV | T319C   | S107P   | M4 | T | B |   |   |  | 2.94   |
| 2  | 26700700  | 26700700  | OTOF      | otoferlin                       | NM_194322      | G | A | nonsynonymous SNV | C62T    | P21L    | M4 | T | B |   |   |  | -0.572 |
| 2  | 26725272  | 26725272  | OTOF      | otoferlin                       | NM_194248      | C | T | nonsynonymous SNV | G606A   | M20I    | M4 | T | B |   |   |  | 5.52   |
| 2  | 27156126  | 27156126  | DPYSL5    | dihydropyrimidinase-like 5      | NM_020134.3    | A | G | nonsynonymous SNV | A715G   | T239A   | M4 | T | B |   |   |  | 5.66   |
| 2  | 54856669  | 54856669  | SPTBN1    | spectrin, beta, non-erythrocyt  | NM_003128.2    | C | T | nonsynonymous SNV | C2398T  | L800F   | M4 | D | P |   |   |  | 3.38   |
| 2  | 65245365  | 65245365  | SLC1A4    | solute carrier family 1 (glutar | NM_003038.4    | G | A | nonsynonymous SNV | G1195A  | V399I   | M4 | T | B |   |   |  | 0.22   |
| 2  | 68364478  | 68364478  | WDR92     | WD repeat domain 92             | NM_138458.3    | T | C | nonsynonymous SNV | A721G   | M241V   | M4 | T | B |   |   |  | 4.81   |
| 2  | 71360282  | 71360282  | MPHOSPH10 | M-phase phosphoprotein 10 (N    | NM_005791      | G | A | nonsynonymous SNV | G344A   | R115H   | M4 | T | B |   |   |  | 2.81   |
| 2  | 77746870  | 77746870  | LRRTM4    | eucine rich repeat transmemt    | NM_001134745.1 | C | T | nonsynonymous SNV | G125A   | G42D    | M4 | T | D |   |   |  | 5.72   |
| 2  | 85893741  | 85893741  | SFTPB     | surfactant protein B            | NM_000542.3    | G | A | nonsynonymous SNV | C428T   | T143I   | M4 | T | B |   |   |  | 3.33   |
| 2  | 9621490   | 9621490   | IAH1      | isoamyl acetate-hydrolyzing e   | NM_001039613   | C | T | nonsynonymous SNV | C359T   | S120F   | M4 | D | D |   |   |  | 5.75   |
| 2  | 9630645   | 9630645   | ADAM17    | ADAM metalloproteinase dom      | NM_003183      | G | T | nonsynonymous SNV | C2136A  | N712K   | M4 | T | D |   |   |  | -8.4   |
| 2  | 96795608  | 96795608  | ASTL      | astacin-like metallo-endopept   | NM_001020336   | T | G | nonsynonymous SNV | A829C   | K277Q   | M4 | T | B |   |   |  | -2.33  |
| 2  | 97873681  | 97873681  | ANKRD36   | ankyrin repeat domain 36        | NM_001164315   | C | A | nonsynonymous SNV | C3203A  | A1068D  | M4 | T | B |   |   |  | -1.93  |
| 20 | 1600524   | 1600524   | SIRPB1    | signal-regulatory protein beta  | NM_006065.3    | T | C | nonsynonymous SNV | A67G    | R23G    | M4 | T | B |   |   |  | 0.15   |
| 20 | 23375794  | 23375794  | NAPB      | N-ethylmaleimide-sensitive fa   | NM_001283018.1 | G | C | nonsynonymous SNV | C336G   | I112M   | M4 | D | P |   |   |  | 5.61   |
| 20 | 47266600  | 47266600  | PREX1     | phosphatidylinositol-3,4,5-tris | NM_020820      | G | A | nonsynonymous SNV | C3083T  | P1028L  | M4 | D | D |   |   |  | 4.6    |
| 20 | 60913300  | 60913300  | LAMA5     | laminin, alpha 5                | NM_005560      | G | A | nonsynonymous SNV | C1744T  | P582S   | M4 | D | P |   |   |  | 5.38   |
| 20 | 60986019  | 60986019  | RBBP8NL   | RBBP8 N-terminal like           | NM_080833      | G | A | nonsynonymous SNV | T1910G  | L637R   | M4 | T | P |   |   |  | 1.32   |
| 21 | 31802768  | 31802768  | KRTAP13-4 | keratin associated protein 13   | NM_181600      | A | C | nonsynonymous SNV | G175A   | A59T    | M4 | T | B |   |   |  | -2.5   |
| 21 | 31869286  | 31869286  | KRTAP19-4 | keratin associated protein 19   | NM_181610      | T | C | nonsynonymous SNV | A143G   | Y48C    | M4 | D | B |   |   |  | -4.2   |
| 21 | 32201835  | 32201835  | KRTAP7-1  | keratin associated protein 7-1  | NM_181606      | A | C | nonsynonymous SNV | T182G   | I61S    | M4 | T |   |   |   |  |        |
| 21 | 32201866  | 32201866  | KRTAP7-1  | keratin associated protein 7-1  | NM_181606      | A | G | nonsynonymous SNV | T151C   | S51P    | M4 | T |   |   |   |  |        |
| 21 | 37605228  | 37605228  | DOPEY2    | dopey family member 2           | NM_005128      | C | T | nonsynonymous SNV | C2477T  | S826F   | M4 | D | D |   |   |  | 5.98   |
| 21 | 47754634  | 47754634  | PCNT      | pericentri                      | NM_006031      | C | G | nonsynonymous SNV | C591G   | I197M   | M4 | T | B |   |   |  | -0.47  |
| 22 | 26997976  | 26997976  | CRYBB1    | crystallin, beta B1             | NM_001887      | C | T | nonsynonymous SNV | G442A   | E148K   | M4 | T | B |   |   |  | 4.7    |
| 22 | 37690758  | 37690758  | CYTH4     | cytohesin 4                     | NM_013385      | G | A | nonsynonymous SNV | G160A   | E54K    | M4 | T | B |   |   |  | 2.53   |
| 22 | 38308466  | 38308466  | MICAL1    | MICAL-like 1                    | NM_033386      | C | T | stopgain          | C304T   | Q102X   | M4 | T |   |   |   |  | 4.81   |
| 22 | 50757291  | 50757291  | DENND6B   | DENN/MADD domain containi       | NM_001001794   | G | A | nonsynonymous SNV | C244T   | P82S    | M4 | D | D |   |   |  | 4.86   |
| 22 | 50876662  | 50876662  | PPP6R2    | protein phosphatase 6, regula   | NM_001242898.1 | T | G | nonsynonymous SNV | T1899G  | D633E   | M4 | T | B |   |   |  | -7.96  |
| 3  | 100103375 | 100103375 | TOMM70A   | translocase of outer mitochor   | NM_014820      | G | A | nonsynonymous SNV | C683T   | A228V   | M4 | T | D |   |   |  | 5.95   |
| 3  | 108074154 | 108074154 | HHLA2     | HERV-H LTR-associating 2        | NM_007072.3    | C | T | nonsynonymous SNV | C611T   | S204L   | M4 | T | P |   |   |  | 3.89   |
| 3  | 121712730 | 121712730 | ILDR1     | immunoglobulin-like domain      | NM_001199799.1 | A | C | nonsynonymous SNV | T866G   | L289W   | M4 | T | D |   |   |  | 5.14   |
| 3  | 122003757 | 122003757 | CASR      | calcium-sensing receptor        | NM_001178065.1 | G | T | nonsynonymous SNV | G2986T  | A996S   | M4 | T | B |   |   |  | 4.92   |
| 3  | 130125116 | 130125116 | COL6A5    | collagen, type VI, alpha 5      | NM_001278298.1 | G | C | nonsynonymous SNV | G4430C  | C1477S  | M4 | T | B |   |   |  | 0.227  |

|   |           |           |          |                                  |                |   |   |                   |        |        |    |   |   |        |
|---|-----------|-----------|----------|----------------------------------|----------------|---|---|-------------------|--------|--------|----|---|---|--------|
| 3 | 130134492 | 130134492 | COL6A5   | collagen, type VI, alpha 5       | NM_001278298.1 | T | C | nonsynonymous SNV | T4765C | S1589P | M4 | T | B | -5.28  |
| 3 | 132209844 | 132209844 | DNAJC13  | DnaJ (Hsp40) homolog, subfa      | NM_015268      | T | C | nonsynonymous SNV | T3572C | I1191T | M4 | T | B | 3.98   |
| 3 | 134339627 | 134339627 | KY       | kyphoscoliosis peptidase         | NM_178554      | C | T | nonsynonymous SNV | G556A  | V186I  | M4 | T | D | 4.66   |
| 3 | 1424809   | 1424809   | CNTN6    | contactin 6                      | NM_014461.3    | G | A | nonsynonymous SNV | G2350A | E784K  | M4 | T | B | 4.28   |
| 3 | 151150566 | 151150566 | MED12L   | mediator complex subunit 12      | NM_053002      | C | T | nonsynonymous SNV | C6412T | P2138S | M4 | D | B | 4.65   |
| 3 | 172365832 | 172365832 | NCEH1    | neutral cholesterol ester hydr   | NM_001146276.1 | T | G | nonsynonymous SNV | A307C  | K103Q  | M4 | T | B | 4.78   |
| 3 | 172607409 | 172607409 | SPATA16  | spermatogenesis associated       | NM_031955      | C | T | nonsynonymous SNV | G1661A | R554Q  | M4 | D | D | 5.78   |
| 3 | 186445052 | 186445052 | KNK1     | kininogen 1                      | NM_001102416.2 | T | G | nonsynonymous SNV | T591G  | I197M  | M4 | D | P | -9.97  |
| 3 | 187089031 | 187089031 | RTP4     | receptor (chemosensory) tran     | NM_022147      | C | A | nonsynonymous SNV | C611A  | A204D  | M4 | T | B | 0.673  |
| 3 | 193080414 | 193080414 | ATP13A5  | ATPase type 13A5                 | NM_198505      | C | G | nonsynonymous SNV | G397C  | E133Q  | M4 | T | B | 5.6    |
| 3 | 195513365 | 195513365 | MUC4     | mucin 4, cell surface associat   | NM_018406      | G | A | nonsynonymous SNV | C5086T | L3298H | M4 |   | B | 0      |
| 3 | 195516305 | 195516305 | MUC4     | mucin 4, cell surface associat   | NM_018406      | C | T | nonsynonymous SNV | G2146A | A716T  | M4 | T | B | -5.21  |
| 3 | 3295966   | 3295966   | CCR4     | chemokine (C-C motif) recepl     | NM_005508      | C | T | nonsynonymous SNV | C1052T | T351I  | M4 | D | P | 5.86   |
| 3 | 38357961  | 38357961  | SLC22A14 | solute carrier family 22, mem    | NM_004803      | C | G | nonsynonymous SNV | C1679G | P560R  | M4 | D | D | 2.39   |
| 3 | 38595902  | 38595902  | SCN5A    | sodium channel, voltage gate     | NM_198056.2    | C | T | nonsynonymous SNV | G4681A | A1561T | M4 | T | B | 0.876  |
| 3 | 3887871   | 3887871   | LRRN1    | leucine rich repeat neuronal     | NM_020873      | G | A | nonsynonymous SNV | G1546A | V516I  | M4 | T | B | 5.69   |
| 3 | 46729757  | 46729757  | ALS2CL   | ALS2 C-terminal like             | NM_147129.3    | C | G | nonsynonymous SNV | G133C  | E45Q   | M4 | T | P | 4.36   |
| 3 | 48669174  | 48669174  | SLC26A6  | solute carrier family 26 (anior  | NM_022911.2    | C | A | nonsynonymous SNV | G811T  | A271S  | M4 | D | P | -10.7  |
| 3 | 52740182  | 52740182  | SPCS1    | signal peptidase complex sut     | NM_014041      | C | G | nonsynonymous SNV | C121G  | P41A   | M4 | T | B | -4.39  |
| 3 | 52833805  | 52833805  | ITIH3    | Inter-alpha-trypsin inhibitor h  | NM_002217      | C | A | nonsynonymous SNV | C943A  | Q315K  | M4 | T | B | 4.15   |
| 3 | 57132275  | 57132275  | IL17RD   | Interleukin 17 receptor D        | NM_017563      | C | T | nonsynonymous SNV | G1456A | G486R  | M4 | T | P | 5.54   |
| 3 | 69299233  | 69299233  | FRMD4B   | FERM domain containing 4B        | NM_015123      | C | G | nonsynonymous SNV | G519C  | E173D  | M4 | T | B | 4.33   |
| 3 | 71021812  | 71021812  | FOXP1    | Forkhead box P1                  | NM_032682      | T | G | nonsynonymous SNV | A1546C | N516H  | M4 | D | D | 5.81   |
| 3 | 75788382  | 75788382  | ZNF717   | zinc finger protein 717          | NM_001290209   | C | T | nonsynonymous SNV | G242A  | G81E   | M4 | T | B | -3.99  |
| 3 | 75788394  | 75788394  | ZNF717   | zinc finger protein 717          | NM_001290209   | C | G | nonsynonymous SNV | G230C  | R77T   | M4 | T | B | 1.23   |
| 3 | 97664725  | 97664725  | MINA     | MYC induced nuclear antigen      | NM_001042533   | C | T | nonsynonymous SNV | G1156A | A386T  | M4 | T | B | 1.6    |
| 3 | 97868588  | 97868588  | OR5H14   | Olfactory receptor, family 5, s  | NM_001005514   | A | G | nonsynonymous SNV | A359G  | Y120C  | M4 | D | B | 2.49   |
| 4 | 13615865  | 13615865  | BOD1L1   | Biorientation of chromosomes     | NM_148894      | C | T | nonsynonymous SNV | G1129A | E377K  | M4 | T | D | 5.45   |
| 4 | 1388945   | 1388945   | CRIPAK   | Cysteine-rich PAK1 inhibitor     | NM_175918      | C | T | nonsynonymous SNV | T646C  | W216R  | M4 | T | B | -2.82  |
| 4 | 152570668 | 152570668 | FAM160A1 | Family with sequence similar     | NM_001109977   | A | G | nonsynonymous SNV | A1475G | Y492C  | M4 | T | B | 4      |
| 4 | 159782889 | 159782889 | FNIP2    | Folliculin interacting protein 2 | NM_020840      | G | T | nonsynonymous SNV | G1426T | A476S  | M4 |   | P | 5.74   |
| 4 | 162306909 | 162306909 | FSTL5    | Follistatin-like 5               | NM_020116      | C | T | nonsynonymous SNV | G2534A | G845E  | M4 | D | D | 5.84   |
| 4 | 183673041 | 183673041 | TENM3    | Teneurin transmembrane pro       | NM_001080477   | C | T | nonsynonymous SNV | C3718T | R1240C | M4 | D | D | 5.38   |
| 4 | 183694753 | 183694753 | TENM3    | Teneurin transmembrane pro       | NM_001080477   | T | G | nonsynonymous SNV | T5021G | I1674S | M4 | T | P | 5.26   |
| 4 | 186318414 | 186318414 | ANKRD37  | Ankyrin repeat domain 37         | NM_181726      | T | G | nonsynonymous SNV | T138G  | F46L   | M4 | T | B | -4.25  |
| 4 | 20490500  | 20490500  | SLIT2    | slit homolog 2 (Drosophila)      | NM_004787      | C | T | nonsynonymous SNV | G670T  | L224F  | M4 | D | D | 3.72   |
| 4 | 3487359   | 3487359   | DOK7     | Docking protein 7                | NM_173660      | C | T | nonsynonymous SNV | C626T  | P209L  | M4 | D | D | 4.7    |
| 4 | 4304522   | 4304522   | ZBTB49   | Zinc finger and BTB domain       | NM_145291      | A | C | nonsynonymous SNV | A959C  | Y320S  | M4 | T | B | -2.97  |
| 4 | 71099827  | 71099827  | FDCSP    | Follicular dendritic cell secret | NM_152997      | T | A | nonsynonymous SNV | T181A  | F61I   | M4 | D | B | 1.19   |
| 4 | 76489582  | 76489582  | C4orf26  | Chromosome 4 open reading        | NM_001260981   | G | A | nonsynonymous SNV | G370A  | V124I  | M4 |   | B | -4.61  |
| 4 | 77003361  | 77003361  | ART3     | ADP-ribosyltransferase 3         | NM_001130016   | C | T | nonsynonymous SNV | C454T  | P152S  | M4 |   | B | 2.37   |
| 4 | 88106627  | 88106627  | KLHL8    | Kelch-like family member 8       | NM_020803      | G | A | stopgain          | C541T  | R181X  | M4 | T |   | 4.82   |
| 4 | 88536818  | 88536818  | DSPP     | Dentin sialophosphoprotein       | NM_014208      | A | G | nonsynonymous SNV | A3004G | N1002D | M4 |   | T |        |
| 5 | 107216812 | 107216812 | FBXL17   | F-box and leucine-rich repeat    | NM_001163315   | T | A | nonsynonymous SNV | A1891T | T631S  | M4 | T | D | 5.95   |
| 5 | 126732427 | 126732427 | MEGF10   | Multiple EGF-like-domains 10     | NM_032446      | G | A | nonsynonymous SNV | G616A  | V206I  | M4 | T | B | 0.787  |
| 5 | 138857925 | 138857925 | TMEM173  | Transmembrane protein 173        | NM_198282      | C | G | nonsynonymous SNV | G689C  | G230A  | M4 | T | B | 0.964  |
| 5 | 140202256 | 140202256 | PCDHA5   | Protocadherin alpha 5            | NM_018908      | G | A | nonsynonymous SNV | G896A  | G299D  | M4 | D | D | 4.11   |
| 5 | 140216042 | 140216042 | PCDHA7   | Protocadherin alpha 7            | NM_018910      | G | A | nonsynonymous SNV | G2074A | E692K  | M4 | T | B | 0.65   |
| 5 | 140237158 | 140237158 | PCDHA10  | Protocadherin alpha 10           | NM_018901      | G | A | nonsynonymous SNV | G1525A | V509M  | M4 | D | D | 3.63   |
| 5 | 140559914 | 140559914 | PCDHB8   | Protocadherin beta 8             | NM_019120      | T | C | nonsynonymous SNV | T2299C | F767L  | M4 | D | B | 4.53   |
| 5 | 140574042 | 140574042 | PCDHB10  | Protocadherin beta 10            | NM_018930      | G | T | nonsynonymous SNV | G1917T | R639S  | M4 | T | P | 1.18   |
| 5 | 140682757 | 140682757 | SLC25A2  | Solute carrier family 25 (mito   | NM_031947      | C | T | nonsynonymous SNV | G676A  | V226I  | M4 | T | B | 1.89   |
| 5 | 140725828 | 140725828 | PCDHGA3  | Protocadherin gamma subfar       | NM_018916      | C | T | nonsynonymous SNV | C2228T | A743V  | M4 | T | B | 4.14   |
| 5 | 140751128 | 140751128 | PCDHGB3  | Protocadherin gamma subfar       | NM_018924      | C | G | nonsynonymous SNV | C1167G | N389K  | M4 |   |   |        |
| 5 | 140772427 | 140772427 | PCDHGA8  | protocadherin gamma subfan       | NM_014004      | T | G | nonsynonymous SNV | T47G   | L16R   | M4 | D | D | 5.04   |
| 5 | 140793007 | 140793007 | PCDHGA10 | Protocadherin gamma subfar       | NM_018913      | A | G | nonsynonymous SNV | A265G  | I89V   | M4 | T | B | 2.76   |
| 5 | 157214920 | 157214920 | CLINT1   | clathrin interactor 1            | NM_001195556   | G | A | nonsynonymous SNV | C1612T | R538W  | M4 | D | D | 5.97   |
| 5 | 168233583 | 168233583 | SLIT3    | slit homolog 3                   | NM_001271946   | G | A | nonsynonymous SNV | C803T  | S268L  | M4 | T | B | 4.66   |
| 5 | 174868847 | 174868847 | DRD1     | Dopamine receptor D1             | NM_000794      | G | A | nonsynonymous SNV | C1256T | A419V  | M4 | T | B | 4.54   |
| 5 | 176963612 | 176963612 | FAM193B  | family with sequence similar     | NM_001190946   | G | A | nonsynonymous SNV | C823T  | P275S  | M4 | T | B | 3.44   |
| 5 | 179044053 | 179044053 | HNRNPH1  | Heterogeneous nuclear ribon      | NM_001257293   | G | T | stopgain          | C1116A | Y372X  | M4 | T |   | 5.77   |
| 5 | 19747219  | 19747219  | CDH18    | cadherin 18, type 2              | NM_001291956   | C | G | nonsynonymous SNV | G355C  | E119Q  | M4 |   | D | 5.23   |
| 5 | 21975364  | 21975364  | CDH12    | Cadherin 12, type 2              | NM_004061      | T | G | nonsynonymous SNV | A362C  | E121A  | M4 | D | D | 5.16   |
| 5 | 41149420  | 41149420  | C6       | Complement component 6           | NM_001115131   | C | T | nonsynonymous SNV | G2546A | R849K  | M4 | D | D | 5.85   |
| 5 | 72419267  | 72419267  | TMEM171  | Transmembrane protein 171        | NM_173490      | T | C | nonsynonymous SNV | T67C   | F23L   | M4 | d | b | 5.09   |
| 5 | 74518111  | 74518111  | ANKRD31  | Ankyrin repeat domain 31         | NM_001164443   | T | C | nonsynonymous SNV | A251G  | K84R   | M4 | T | B | -0.013 |
| 5 | 78915496  | 78915496  | PAPD4    | PAP associated domain cont       | NM_001114394   | C | G | nonsynonymous SNV | C25G   | R9G    | M4 | D | D | 4.55   |

|   |           |           |                 |                                 |                      |   |   |                   |                     |                    |    |   |   |        |
|---|-----------|-----------|-----------------|---------------------------------|----------------------|---|---|-------------------|---------------------|--------------------|----|---|---|--------|
| 5 | 79028472  | 79028472  | CMYA5           | Cardiomyopathy associated f     | NM 153610            | C | T | nonsynonymous SNV | C3884T              | A1295V             | M4 | T | B | -0.023 |
| 5 | 79095383  | 79095383  | CMYA5           | Cardiomyopathy associated f     | NM 153610            | G | A | nonsynonymous SNV | G12154A             | G4052R             | M4 | D | D | 5.99   |
| 5 | 82833369  | 82833369  | VCAN            | Versican                        | NM 004385            | A | G | nonsynonymous SNV | A4547G              | K1516R             | M4 | T | B | 2.79   |
| 5 | 82835724  | 82835724  | VCAN            | Versican                        | NM 004385            | T | A | nonsynonymous SNV | T6902A              | F2301Y             | M4 | T | B | 3.61   |
| 5 | 82837631  | 82837631  | VCAN            | Versican                        | NM 004385            | G | T | nonsynonymous SNV | G8809T              | D2937Y             | M4 | D | P | 0.819  |
| 5 | 96086334  | 96086334  | CAST            | Calpastatin                     | NM 001042440         | G | C | nonsynonymous SNV | G1349C              | C450S              | M4 | T | B | 4.46   |
| 6 | 132945390 | 132945390 | TAAR2           | Trace amine associated rece     | NM 001033080         | C | T | nonsynonymous SNV | G25A                | E9K                | M4 | T | B | -1.59  |
| 6 | 133015271 | 133015271 | VNN1            | Vanin 1                         | NM 004666            | T | C | nonsynonymous SNV | A392G               | N131S              | M4 | T | D | 6.07   |
| 6 | 158910698 | 158910698 | TULP4           | Tubby like protein 4            | NM 020245            | G | A | nonsynonymous SNV | G1565A              | S522N              | M4 | T | B | 5.57   |
| 6 | 160952838 | 160952838 | LPA             | Lipoprotein, Lp(a)              | NM 005577            | G | A | nonsynonymous SNV | C6046T              | R2016C             | M4 | T | D | 3.02   |
| 6 | 160977181 | 160977181 | LPA             | Lipoprotein, Lp(a)              | NM 005577            | A | G | nonsynonymous SNV | T4849C              | Y1617H             | M4 | D | D | 2.77   |
| 6 | 16145325  | 16145325  | MYLIP           | Myosin regulatory light chain   | NM 013262            | A | G | nonsynonymous SNV | A1025G              | N342S              | M4 | T | B | 3.85   |
| 6 | 16290761  | 16290761  | GMPT            | Guanosine monophosphate r       | NM 006877            | T | A | nonsynonymous SNV | T766A               | F256I              | M4 | T | B | 5.22   |
| 6 | 166575973 | 166575973 | T               | T, brachyury homolog (mouse     | NM 003181            | G | A | nonsynonymous SNV | C866T               | P289L              | M4 |   |   |        |
| 6 | 167592535 | 167592535 | TCP10L2         | T-complex 10-like 2             | NM 001145121         | G | C | nonsynonymous SNV | G694C               | G232R              | M4 | T | B | 0.56   |
| 6 | 170059575 | 170059575 | WDR27           | WD repeat domain 27             | NM 182552            | G | A | nonsynonymous SNV | C1169T              | A390V              | M4 | D | D | 4.7    |
| 6 | 170070723 | 170070723 | WDR27           | WD repeat domain 27             | NM 182552            | A | G | nonsynonymous SNV | T398C               | L133P              | M4 | T | B | 0.661  |
| 6 | 170176146 | 170176146 | ERMARD          | ER membrane-associated RN       | NM 018341            | G | A | nonsynonymous SNV | G1505A              | R502H              | M4 | T | B | -10.5  |
| 6 | 29080152  | 29080152  | OR2J3           | Olfactory receptor, family 2, s | NM 001005216         | A | C | nonsynonymous SNV | A485C               | H162P              | M4 | D | P | 1.52   |
| 6 | 29759923  | 29759923  | LOC554223       |                                 | NM 001207043         | T | C | nonsynonymous SNV | T139C               | S47P               | M4 |   |   |        |
| 6 | 30673163  | 30673163  | MDC1            | Mediator of DNA-damage ch       | NM 014641            | T | G | nonsynonymous SNV | A3797C              | Y1266S             | M4 | T | B | 1.26   |
| 6 | 31378956  | 31378956  | MICA            | MHC class I polypeptide-rela    | NM 001289152         | C | G | nonsynonymous SNV | C142G               | L48V               | M4 | D | D | 1.94   |
| 6 | 31540784  | 31540784  | LTA             | lymphotoxin alpha               | NM 001159740         | C | A | nonsynonymous SNV | C179A               | T60N               | M4 | T | B | 3.15   |
| 6 | 31605278  | 31605278  | PRRC2A          | Proline-rich coiled-coil 2A     | NM 004638            | C | T | nonsynonymous SNV | C6389T              | P2130L             | M4 | D | P | 5.84   |
| 6 | 31938412  | 31938412  | DXO             | Decapping Exoribonuclease       | NM 005510            | G | T | nonsynonymous SNV | C783A               | H261Q              | M4 | T | B | 3.59   |
| 6 | 34824636  | 34824636  | UHRF1BP1        | UHRF1 Binding Protein 1         | NM 017754            | A | G | nonsynonymous SNV | A1361G              | Q454R              | M4 | T | B | 5.01   |
| 6 | 4133855   | 4133855   | ECI2            | Enoyl-CoA delta isomerase 2     | NM 206836            | C | T | nonsynonymous SNV | G141A               | M47I               | M4 | T | B | 4.4    |
| 6 | 42074872  | 42074872  | C6orf132        | Chromosome 6 Open Readin        | NM 001164446         | A | C | nonsynonymous SNV | T778G               | S260A              | M4 | T |   | 3.62   |
| 6 | 42712957  | 42712957  | TBCO            | Tubulin Folding Cofactor C      | NM 003192            | A | C | nonsynonymous SNV | T855G               | S285R              | M4 | D | B | 3.26   |
| 6 | 42891022  | 42891022  | PTCRA           | pre T-cell antigen receptor al  | NM 001243168         | G | A | nonsynonymous SNV | G316A               | V106I              | M4 | T | P | 4.82   |
| 6 | 46555780  | 46555780  | CYP39A1         | cytochrome P450, family 39,     | NM 001278739:        | C | A | nonsynonymous SNV | G636T               | L212F              | M4 | D | P | -1.57  |
| 6 | 46555781  | 46555781  | CYP39A1         | cytochrome P450, family 39,     | NM 001278739:        | A | T | stopgain          | T635A               | L212X              | M4 |   |   |        |
| 6 | 49753961  | 49753961  | PGK2            | Phosphoglycerate Kinase 2       | NM 138733            | A | C | nonsynonymous SNV | T940G               | L314V              | M4 | D | D | 3.03   |
| 6 | 49928150  | 49928150  | DEFB114         | Defensin, Beta 114              | NM 001037499         | G | A | nonsynonymous SNV | C65T                | T22I               | M4 |   | B | 0.415  |
| 6 | 56420538  | 56420538  | DST             | Dystonin                        | NM 001144769         | C | T | nonsynonymous SNV | G8384A              | R2795H             | M4 | T | B | 5.67   |
| 6 | 65300143  | 65300143  | EYS             | Eyes shut homolog (Drosoph      | NM 001292009         | G | C | nonsynonymous SNV | C5617G              | L1873V             | M4 | T | B | 1.96   |
| 6 | 76023011  | 76023011  | FILIP1          | filamin A interacting protein 1 | NM 001289987         | G | A | nonsynonymous SNV | C2546T              | P849L              | M4 | D | D | 4.77   |
| 6 | 99374696  | 99374696  | FBXL4           | F-box and leucine-rich repeat   | NM 001278716         | C | T | nonsynonymous SNV | G169A               | E57K               | M4 | D | B | 4.65   |
| 7 | 100014711 | 100014711 | ZCWPW1          | zinc finger, CW type with PW    | NM 017984            | T | C | nonsynonymous SNV | A457G               | T153A              | M4 |   | B | 0.203  |
| 7 | 100683249 | 100683249 | MUC17           | Mucin 17, Cell Surface Assoc    | NM 001040105         | C | T | nonsynonymous SNV | C8552T              | P2851L             | M4 | T | P | 0.267  |
| 7 | 117199582 | 117199582 | CFTR            | Cystic Fibrosis Transmembra     | NM 000492            | G | A | nonsynonymous SNV | G1457A              | G486E              | M4 | D | D | 5.48   |
| 7 | 12376811  | 12376811  | VWDE            | Von Willebrand Factor D And     | NM 001135924         | A | C | nonsynonymous SNV | T4454G              | F1485C             | M4 | T | B | 4.86   |
| 7 | 12610594  | 12610594  | SCIN            | Scinderin                       | NM 00112706          | A | G | nonsynonymous SNV | A182G               | H61R               | M4 | T | B | 4.9    |
| 7 | 134346341 | 134346341 | BPGM            | 2,3-bisphosphoglycerate mut     | NM 199186            | C | T | stopgain          | C82T                | Q28X               | M4 | D | D | 6.04   |
| 7 | 135291649 | 135291649 | NUP205          | Nucleoporin 205kDa              | NM 01513             | A | G | nonsynonymous SNV | A3056G              | N1019S             | M4 | T | B | 5.18   |
| 7 | 139026152 | 139026152 | C7orf55,C7orf55 | chromosome 7 open reading       | C7orf55-LUC7L2:NM 01 | T | G | nonsynonymous SNV | C7orf55-LUC7L2:T22C | C7orf55-LUC7L2:S8A | M4 | T | B | 2.58   |
| 7 | 141414151 | 141414151 | WEE2            | WEE1 Homolog 2 (S. Pombe        | NM 001105558         | C | T | nonsynonymous SNV | C485T               | S162F              | M4 | D | P | 4.92   |
| 7 | 142655008 | 142655008 | KEL             | Kell Blood Group, Metallo-En    | NM 000420            | G | A | nonsynonymous SNV | C578T               | T193M              | M4 | D | B | 3.96   |
| 7 | 142655503 | 142655503 | KEL             | Kell Blood Group, Metallo-En    | NM 000420            | G | A | nonsynonymous SNV | C413T               | S138F              | M4 | T | B | 3.78   |
| 7 | 143085968 | 143085968 | ZYX             | Zyxin                           | NM 001010972         | C | T | nonsynonymous SNV | C1423T              | R475C              | M4 | T | B | 2.66   |
| 7 | 143747879 | 143747879 | OR2A5           | Olfactory Receptor, Family 2,   | NM 012365            | C | T | nonsynonymous SNV | C385T               | P129S              | M4 | D | D | 4.36   |
| 7 | 1482025   | 1482025   | MICAL2          | MICAL-Like 2                    | NM 182924            | G | A | nonsynonymous SNV | C1514T              | P505L              | M4 | T | B | 2.5    |
| 7 | 150761314 | 150761314 | SLC4A2          | Solute carrier family 4 (anion  | NM 001199692         | G | A | nonsynonymous SNV | G77A                | G26E               | M4 | T | B | -0.421 |
| 7 | 151962265 | 151962265 | KMT2C           | Lysine (K)-Specific Methyltr    | NM 170606            | C | T | nonsynonymous SNV | G1042A              | D348N              | M4 | T | D | 4.65   |
| 7 | 2418877   | 2418877   | EIF3B           | eukaryotic translation initiati | NM 001037283         | G | A | nonsynonymous SNV | G2341A              | G781R              | M4 | D | P | 5.82   |
| 7 | 30795331  | 30795331  | INMT            | indolethylamine N-methyltran    | NM 006774            | A | G | nonsynonymous SNV | A656G               | E219G              | M4 | T | P | 3.67   |
| 7 | 36552907  | 36552907  | AOAH            | acyloxyacyl hydrolase (neutr    | NM 001637            | G | A | nonsynonymous SNV | C1679T              | P560L              | M4 | D | D | 4.67   |
| 7 | 44715648  | 44715648  | OGDH            | oxoglutarate (alpha-ketoglut    | NM 002541            | C | T | nonsynonymous SNV | C1106T              | S369F              | M4 | D | D | 5.14   |
| 7 | 44805882  | 44805882  | ZMI22           | zinc finger, MIZ-type containi  | NM 031449            | C | T | nonsynonymous SNV | C2362T              | P788S              | M4 | T | P | 4.83   |
| 7 | 53103959  | 53103959  | POM121L12       | POM121 transmembrane nuc        | NM 182595            | G | A | nonsynonymous SNV | G595A               | E199K              | M4 | D | B | 0.346  |
| 7 | 57528813  | 57528813  | ZNF716          | Zinc finger protein 716         | NM 001159279         | G | A | nonsynonymous SNV | G646A               | E216K              | M4 | T | B | -0.39  |
| 7 | 64439678  | 64439678  | ZNF117          | Zinc finger protein 117         | NM 015852            | G | A | nonsynonymous SNV | C271T               | H91Y               | M4 | T | B | -2.97  |
| 7 | 6456474   | 6456474   | DAGLB           | diacylglycerol lipase, beta     | NM 139179            | G | A | nonsynonymous SNV | C1297T              | P433S              | M4 | T | P | 4.85   |
| 7 | 82455968  | 82455968  | PCL0            | Piccolo presynaptic cytomat     | NM 033026            | C | G | nonsynonymous SNV | G14352C             | K4784N             | M4 | D | D | 4.6    |
| 7 | 883199    | 883199    | SUN1            | Sad1 and UNC84 domain coi       | NM 001171945         | C | T | nonsynonymous SNV | C763T               | P255S              | M4 |   | B | 0.169  |
| 7 | 92028039  | 92028039  | ANKIB1          | Ankyrin repeat and IBR doma     | NM 019004            | C | A | nonsynonymous SNV | C3046A              | L1016M             | M4 | D | B | 3.36   |
| 7 | 99817585  | 99817585  | PVRIG           | Poliiovirus receptor related im | NM 024070            | G | T | stopgain          | G52T                | E18X               | M4 | D |   | -3.09  |



|    |           |           |             |                                                             |                |   |   |                   |         |        |    |   |   |        |
|----|-----------|-----------|-------------|-------------------------------------------------------------|----------------|---|---|-------------------|---------|--------|----|---|---|--------|
| 19 | 53269382  | 53269382  | ZNF600      | Zinc Finger Protein 600                                     | NM_198457      | A | T | nonsynonymous SNV | T1627A  | C543S  | M4 | T | D | -3.02  |
| 1  | 153665659 | 153665659 | NPR1        | natriuretic peptide receptor 1                              | NM_000906      | G | A | nonsynonymous SNV | G3109A  | D1037N | M6 | T | B | 4.42   |
| 11 | 3740679   | 3740679   | NUP98       | nucleoporin 98kDa                                           | NM_016320.4    | C | T | nonsynonymous SNV | G2362A  | D788N  | M6 | T | D | 5.37   |
| 12 | 104376700 | 104376700 | TDG         | thymine DNA glycosylase                                     | NM_003211      | A | C | nonsynonymous SNV | A602C   | K201T  | M6 | T | P | 5.4    |
| 12 | 8757515   | 8757515   | AICDA       | activation-induced cytidine deaminase                       | NM_020661      | T | A | nonsynonymous SNV | A431T   | Y144F  | M6 | T | B | 5.44   |
| 13 | 103385259 | 103385259 | CCDC168     | coiled-coil domain containing 168                           | NM_001146197   | G | A | stopgain          | C17788T | Q5930X | M6 | T |   | 2.01   |
| 15 | 58001174  | 58001174  | GC0M1.POLR2 | GRINL1A complex locus 1                                     | NM_001285900   | A | C | nonsynonymous SNV | A1567C  | T523P  | M6 | D | B | -0.124 |
| 16 | 16177275  | 16177275  | ABCC1       | ATP-binding cassette, sub-family C                          | NM_004996      | G | A | nonsynonymous SNV | G2168A  | R723Q  | M6 | T | B | -2.86  |
| 16 | 50707676  | 50707676  | SNX20       | sorting nexin 20                                            | NM_182854      | C | A | nonsynonymous SNV | G592T   | A198S  | M6 | T | P | 5.63   |
| 16 | 66426186  | 66426186  | CDH5        | cadherin 5, type 2 (vascular)                               | NM_001795      | C | T | stopgain          | C1117T  | Q373X  | M6 | T |   | 2.53   |
| 19 | 14261908  | 14261908  | LPHN1       | adhesion G protein-coupled receptor 1                       | NM_001008701   | C | G | nonsynonymous SNV | G4202C  | S1401T | M6 | T | D | 3.93   |
| 19 | 18377653  | 18377653  | KIAA1683    | KIAA1683                                                    | NM_001145304.1 | G | A | nonsynonymous SNV | C697T   | R76Q   | M6 | D | B | 0.004  |
| 2  | 208988958 | 208988958 | CRYGD       | crystallin, gamma D                                         | NM_006891      | T | C | nonsynonymous SNV | A130G   | M44V   | M6 | T | B | 4.35   |
| 2  | 219603798 | 219603798 | TTL4        | tubulin tyrosine ligase-like family 4                       | NM_014640      | A | C | nonsynonymous SNV | A1399C  | T467P  | M6 | D | B | 3.49   |
| 2  | 236403349 | 236403349 | AGAP1       | ArfGAP with GTPase domain                                   | NM_001037131.2 | C | A | nonsynonymous SNV | C19A    | L7M    | M6 | D | B | 2.87   |
| 20 | 47297823  | 47297823  | PREX1       | phosphatidylinositol-3,4,5-trisphosphate 3-phosphatase 1    | NM_020820      | T | G | nonsynonymous SNV | A1385C  | E462A  | M6 | D | B | 4.41   |
| 20 | 5904705   | 5904705   | CHGB        | chromogranin B                                              | NM_001819      | G | A | nonsynonymous SNV | G1915A  | E639K  | M6 | D | P | 5.79   |
| 22 | 21401723  | 21401723  | LRRRC74B    | leucine rich repeat containing 74B                          | NM_001291006   | C | T | nonsynonymous SNV | C218T   | S73F   | M6 | D |   | 1.39   |
| 3  | 157188277 | 157188277 | VEPH1       | ventricular zone expressed phosphatase 1                    | NM_024621.2    | G | C | nonsynonymous SNV | C180G   | I60M   | M6 | D | P | 2.85   |
| 3  | 195506741 | 195506741 | MUC4        | mucin 4, cell surface associated                            | NM_018406      | G | A | nonsynonymous SNV | C11710T | P3904S | M6 |   | B | 0      |
| 5  | 73931128  | 73931128  | ENC1        | Ectodermal-neural cortex 1                                  | NM_001256574   | C | T | nonsynonymous SNV | G1183A  | G395R  | M6 | D | D | 5.89   |
| 6  | 74498287  | 74498287  | CD109       | CD109 molecule                                              | NM_133493      | C | T | nonsynonymous SNV | C2653T  | P885S  | M6 | D | D | 5.22   |
| 9  | 134183339 | 134183339 | PPAPDC3     | Phosphatidic Acid Phosphatase 3                             | NM_032728      | G | A | nonsynonymous SNV | G481A   | G161S  | M6 | D | D | 3.78   |
| 9  | 134183340 | 134183340 | PPAPDC3     | Phosphatidic Acid Phosphatase 3                             | NM_032728      | G | A | nonsynonymous SNV | G482A   | G161D  | M6 | D | D | 4.68   |
| 9  | 2039808   | 2039808   | SMARCA2     | SWI/SNF related, matrix associated, non-catalytic subunit 2 | NM_003070      | A | C | nonsynonymous SNV | A698C   | Q233P  | M6 | D | D | 5.89   |
| 9  | 35869919  | 35869919  | OR13J1      | Olfactory Receptor, Family 13, Subclass J, Member 1         | NM_001004487   | C | C | nonsynonymous SNV | G480A   | M160I  | M6 | D | B | -9.36  |
| 9  | 732392    | 732392    | KANK1       | KN motif and ankyrin repeat domain 1                        | NM_001256877   | C | G | stopgain          | C3020G  | S1007X | M6 |   |   | 5.64   |
| 1  | 152732951 | 152732951 | KPRP        | keratinocyte proline-rich protein 1                         | NM_001025231   | C | G | nonsynonymous SNV | C887G   | T296S  | M8 | D | D | 4.89   |
| 1  | 21806621  | 21806621  | NBPF3       | neuroblastoma breakpoint family protein 3                   | NM_032264.4    | T | G | nonsynonymous SNV | T1286G  | F429C  | M8 | D | P | -0.545 |
| 1  | 28800114  | 28800114  | PHACTR4     | phosphatase and actin regulator 4                           | NM_001048183.1 | C | G | nonsynonymous SNV | C872G   | S291C  | M8 | T | D | 5.38   |
| 1  | 43649485  | 43649485  | CFAP57      | cilia and flagella associated protein 57                    | NM_001195831.2 | G | T | nonsynonymous SNV | G698T   | S233I  | M8 | T | B | -3.64  |
| 1  | 52991465  | 52991465  | ZCCHC11     | zinc finger, CCHC domain containing 11                      | NM_001009881.2 | C | A | nonsynonymous SNV | G488T   | G163V  | M8 | T | B | 0.678  |
| 1  | 55273580  | 55273580  | C1orf177    | chromosome 1 open reading frame 177                         | NM_001110533.1 | G | T | nonsynonymous SNV | G376T   | G126C  | M8 | D | D | 4.45   |
| 1  | 89652072  | 89652072  | GBP4        | guanylate binding protein 4                                 | NM_052941      | C | T | nonsynonymous SNV | G1651A  | E551K  | M8 | T | B | -4.45  |
| 1  | 89652102  | 89652102  | GBP4        | guanylate binding protein 4                                 | NM_052941      | A | T | nonsynonymous SNV | T1621A  | Y541N  | M8 | T | B | 0.417  |
| 10 | 101563815 | 101563815 | ABCC2       | ATP-binding cassette, sub-family C                          | NM_000392      | G | A | nonsynonymous SNV | G1249A  | V417I  | M8 | T | B | -10.3  |
| 10 | 27688076  | 27688076  | PTCHD3      | patched domain containing 3                                 | NM_001034842   | G | T | stopgain          | C1451A  | S484X  | M8 | T |   | -0.472 |
| 11 | 111631593 | 111631593 | PPP2R1B     | protein phosphatase 2, regulatory subunit 1B                | NM_002716.4    | G | T | nonsynonymous SNV | C489A   | F163L  | M8 | D | B | 5.05   |
| 11 | 129780436 | 129780436 | PRDM10      | PR domain containing 10                                     | NM_020228      | T | G | nonsynonymous SNV | A3110C  | Q1037P | M8 | T | B | 1.21   |
| 11 | 1643049   | 1643049   | KRTAP5-4    | keratin associated protein 5-4                              | NM_001012709   | A | C | nonsynonymous SNV | T275G   | V92G   | M8 | T | B | 1.02   |
| 12 | 123200158 | 123200158 | HCAR3       | hydroxycarboxylic acid receptor 3                           | NM_006018      | G | C | nonsynonymous SNV | C1127G  | A376G  | M8 | T | B | 0.929  |
| 12 | 64810521  | 64810521  | XPOT        | exportin, tRNA                                              | NM_007235      | C | T | stopgain          | C187T   | Q63X   | M8 |   |   | 5.2    |
| 13 | 21955683  | 21955683  | ZDHHC20     | zinc finger, DHHC-type containing 20                        | NM_153251.3    | C | A | nonsynonymous SNV | G947T   | G316V  | M8 | T | B | 4.79   |
| 14 | 53525238  | 53525238  | DDHD1       | DDHD domain containing 1                                    | NM_030637.2    | A | T | nonsynonymous SNV | T1949A  | I650N  | M8 | T | D | 6.14   |
| 15 | 31332525  | 31332525  | TRPM1       | transient receptor potential cation channel 1               | NM_001252020.1 | C | A | nonsynonymous SNV | G2163T  | E721D  | M8 | D | B | 4.06   |
| 15 | 42744062  | 42744062  | ZNF106      | zinc finger protein 106                                     | NM_022473      | G | C | nonsynonymous SNV | C339G   | D113E  | M8 | T | B | 3.58   |
| 15 | 54305755  | 54305755  | UNC13C      | unc-13 homolog C (C. elegans)                               | NM_001080534   | C | G | nonsynonymous SNV | C655G   | R219G  | M8 | D | D | 4.97   |
| 15 | 89386652  | 89386652  | ACAN        | aggregranin                                                 | NM_013227.3    | G | A | nonsynonymous SNV | G824A   | R275Q  | M8 | T | D | 5.56   |
| 16 | 15179544  | 15179544  | RRN3        | RRN3 homolog, RNA polymerase III                            | NM_018427.4    | T | C | nonsynonymous SNV | A484G   | I162V  | M8 | T | B | 3.15   |
| 16 | 3586230   | 3586230   | CLUAP1      | clusterin associated protein 1                              | NM_015041.2    | C | T | nonsynonymous SNV | C1201T  | R401W  | M8 | D | P | 2.59   |
| 17 | 1649055   | 1649055   | SERPINF2    | serpin peptidase inhibitor, clade F, member 2               | NM_000934.3    | C | G | nonsynonymous SNV | C219G   | D73E   | M8 | T | B | -1.8   |
| 17 | 45438788  | 45438788  | EFCAB13     | EF-hand calcium binding domain 13                           | NM_152347      | C | T | stopgain          | C706T   | R236X  | M8 | T |   | 1.68   |
| 17 | 4802111   | 4802111   | CHRNA4      | cholinergic receptor, nicotinic alpha 4                     | NM_000080      | C | G | nonsynonymous SNV | G1402C  | V468L  | M8 | T | B | 0.885  |
| 18 | 6950809   | 6950809   | LAMA1       | laminin, alpha 1                                            | NM_005559      | G | T | nonsynonymous SNV | C8369A  | A2790E | M8 | T | P | 5.5    |
| 19 | 8616735   | 8616735   | MYO1F       | myosin IF                                                   | NM_012335      | C | A | nonsynonymous SNV | G660T   | E220D  | M8 | T | B | 3.79   |
| 19 | 9058907   | 9058907   | MUC16       | mucin 16, cell surface associated                           | NM_024690      | G | C | nonsynonymous SNV | C28539G | H9513Q | M8 | D | B | -4.44  |
| 19 | 9075346   | 9075346   | MUC16       | mucin 16, cell surface associated                           | NM_024690      | T | A | nonsynonymous SNV | A12100T | I4034F | M8 | D | P | -1.05  |
| 2  | 114257354 | 114257354 | FOXD4L1     | forkhead box D4-like 1                                      | NM_012184      | A | G | nonsynonymous SNV | A521G   | H174R  | M8 | T | B | 2.57   |
| 2  | 170033094 | 170033094 | LRP2        | low density lipoprotein receptor 2                          | NM_004525      | G | T | nonsynonymous SNV | C10398A | S3466R | M8 | T | B | 1.36   |
| 2  | 196825402 | 196825402 | DNAH7       | dynein, axonemal, heavy chain 7                             | NM_018897      | C | T | nonsynonymous SNV | A2473G  | K825E  | M8 | T | B | 5.74   |
| 2  | 207041786 | 207041786 | GPR1        | G protein-coupled receptor 1                                | NM_005279.3    | G | T | nonsynonymous SNV | C186A   | F62L   | M8 | T | B | 4.97   |
| 20 | 61444540  | 61444540  | OGFR        | opioid growth factor receptor                               | NM_007346      | A | C | nonsynonymous SNV | A1573C  | S525R  | M8 | T | P | -1.64  |
| 22 | 29735038  | 29735038  | AP1B1       | adaptor-related protein complex 1B                          | NM_001127.3    | G | A | nonsynonymous SNV | C2104T  | L702F  | M8 | T | D | 5.84   |
| 22 | 42422822  | 42422822  | WBP2NL      | WBP2 N-terminal like                                        | NM_152613      | C | A | stopgain          | C567A   | Y189X  | M8 | T |   | -4.17  |
| 22 | 42523514  | 42523514  | CYP2D6      | cytochrome P450, family 2, subfamily D, polypeptide 6       | NM_000106.5    | C | T | nonsynonymous SNV | G1108A  | V370I  | M8 | T | B | -6.63  |
| 3  | 65415704  | 65415704  | MAG1I       | Membrane associated guanylate kinase 1                      | NM_001033057   | C | A | nonsynonymous SNV | G1658T  | C553F  | M8 | D | D | 5.92   |
| 5  | 140222641 | 140222641 | PCDHA8      | Protocadherin alpha 8                                       | NM_018911      | A | G | nonsynonymous SNV | A1735G  | K579E  | M8 | T | B | 0.381  |



|    |           |           |           |                                  |                |   |    |                   |              |                  |    |   |   |        |
|----|-----------|-----------|-----------|----------------------------------|----------------|---|----|-------------------|--------------|------------------|----|---|---|--------|
| 5  | 179069883 | 179069883 | C5orf60   | Chromosome 5 open reading        | NM_001142306   | T | A  | nonsynonymous SNV | A670T        | T224S            | M8 | T | B | -0.839 |
| 5  | 892761    | 892761    | BRD9      | Bromodomain containing 9         | NM_023924      | C | A  | nonsynonymous SNV | G12T         | K4N              | M8 | D | B | 2.62   |
| 6  | 168445537 | 168445537 | KIF25     | kinesin family member 25         | NM_030615      | G | T  | nonsynonymous SNV | G1016T       | C339F            | M8 | D | P | 4.12   |
| 6  | 86259444  | 86259444  | SNX14     | Sorting nexin 14                 | NM_153816      | C | A  | nonsynonymous SNV | G788T        | C263F            | M8 | D | D | 5.17   |
| 7  | 44047061  | 44047061  | SPDYE1    | Speedy/RINGO cell cycle reg      | NM_175064      | G | T  | nonsynonymous SNV | G827T        | R276L            | M8 | T | P |        |
| 7  | 63727127  | 63727127  | ZNF679    | Zinc finger protein 679          | NM_153363      | G | T  | nonsynonymous SNV | G1161T       | R372S            | M8 | T | D | -0.427 |
| 8  | 71071744  | 71071744  | NCOA2     | Nuclear receptor coactivator 2   | NM_005640      | G | T  | nonsynonymous SNV | C1120A       | H374N            | M8 | T | B | 6.17   |
| 9  | 135946015 | 135946015 | CEL       | Carboxyl Ester Lipase            | NM_001807      | T | C  | nonsynonymous SNV | T1463C       | I488T            | M8 | D | D | 4.57   |
| 9  | 35957669  | 35957669  | OR2S2     | Olfactory Receptor, Family 2,    | NM_019897      | T | C  | nonsynonymous SNV | A427G        | M143V            | M8 | T | B | 2.09   |
| X  | 106396402 | 106396402 | NUP62CL   | Nucleoporin 62kDa C-termin       | NM_017681      | A | G  | nonsynonymous SNV | T530C        | I177T            | M8 |   | B | -4.01  |
| X  | 114426385 | 114426385 | RBMXL3    | RNA binding motif protein, X-    | NM_001145346   | G | A  | nonsynonymous SNV | G2381A       | R794H            | M8 | D | P | 0.92   |
| X  | 140993642 | 140993642 | MAGEC1    | Melanoma antigen family C1       | NM_005462      | C | T  | nonsynonymous SNV | C452T        | T151I            | M8 | T | B |        |
| X  | 151909156 | 151909156 | CSAG1     | Chondrosarcoma associated        | NM_153478      | A | G  | nonsynonymous SNV | A185G        | K62R             | M8 | T | B | 0.837  |
| X  | 34148841  | 34148841  | FAM47A    | Family with sequence similar     | NM_203408      | A | G  | nonsynonymous SNV | T1555C       | S519P            | M8 | T | B | -0.44  |
| X  | 35821055  | 35821055  | MAGEB16   | Melanoma antigen family B16      | NM_001099921   | A | G  | nonsynonymous SNV | A742G        | M248V            | M8 | D | B | -6.12  |
| X  | 35821056  | 35821056  | MAGEB16   | Melanoma antigen family B16      | NM_001099921   | T | A  | nonsynonymous SNV | T743A        | M248K            | M8 | T | B | 3.06   |
| X  | 47426773  | 47426773  | ARAF      | A-Raf proto-oncogene, serine     | NM_001654      | G | T  | nonsynonymous SNV | G1018T       | V340L            | M8 | D | P | 5.61   |
| X  | 73641569  | 73641569  | SLC16A2   | Solute carrier family 16, mem    | NM_006517      | A | C  | nonsynonymous SNV | T97C         | S33P             | M8 | T | B |        |
| 7  | 140453136 | 140453136 | BRAF      | v-raf murine sarcoma viral or    | NM_004333      | T | T  | nonsynonymous SNV | T1799A       | V600E            | M8 | D | D | 5.65   |
| 1  | 248801602 | 248801602 | OR2T35    | Olfactory Receptor Family 2,     | NM_001001827   | 0 | CA | stopgain          | 957_958insTG | I320_R321delinsX | M8 |   |   |        |
| 2  | 113588140 | 113588140 | IL1B      | Interleukin 1, Beta              | NM_000576      | G | T  | nonsynonymous SNV | C608A        | P203H            | M8 | T | D | 3.63   |
| 13 | 28498644  | 28498644  | PDX1      | Pancreatic And Duodenal Ho       | NM_000209      | G | C  | nonsynonymous SNV | G658C        | V220L            | M8 | T | B | 3.12   |
| 11 | 44098842  | 44098842  | ACCS      | 1-Aminocyclopropane-1-Carb       | NM_001127219   | C | G  | nonsynonymous SNV | C570G        | I190M            | M8 | D | P | 3.87   |
| 12 | 51740409  | 51740409  | CELA1     | chymotrypsin-like elastase fa    | NM_001971      | T | C  | nonsynonymous SNV | A14C         | Y5S              | M8 | T | B | 1.29   |
| 12 | 51740410  | 51740410  | CELA1     | chymotrypsin-like elastase fa    | NM_001971      | A | G  | nonsynonymous SNV | T13C         | Y5H              | M8 | T | B | 2.28   |
| 14 | 23828948  | 23828948  | EFS       | embryonal Fyn-associated su      | NM_005864      | C | G  | nonsynonymous SNV | G739C        | G247R            | M8 | T | B | 2.64   |
| 16 | 848780    | 848780    | GNNG13    | guanine nucleotide binding pi    | NM_016541      | A | T  | nonsynonymous SNV | T143A        | L48Q             | M8 | D | D | 5.07   |
| 19 | 2917807   | 2917807   | ZNF57     | Zinc Finger Protein 57           | NM_173480      | A | C  | nonsynonymous SNV | A1188C       | Q396H            | M8 | T | B | -4.5   |
| 1  | 11709274  | 11709274  | FBXO2     | F-box protein 2                  | NM_012168      | C | A  | nonsynonymous SNV | G626T        | G209V            | M9 | T | D | 3.29   |
| 1  | 120930062 | 120930062 | FCGR1B    | Fc fragment of IgG, high affin   | NM_001017986.3 | C | A  | nonsynonymous SNV | G539A        | G180E            | M9 | T | D | 1.17   |
| 1  | 152127402 | 152127402 | RPTN      | repetin                          | NM_001122965   | G | T  | nonsynonymous SNV | C2173T       | P725S            | M9 | T | B | 1.7    |
| 1  | 153275022 | 153275022 | PGLYRP3   | peptidoglycan recognition pro    | NM_052891      | C | T  | nonsynonymous SNV | G591A        | M197I            | M9 | T | P | 4.49   |
| 1  | 153932977 | 153932977 | SLC39A1   | solute carrier family 39 (zinc   | NM_014437.4    | G | A  | nonsynonymous SNV | C572T        | S191F            | M9 | D | D | 4.74   |
| 1  | 154295461 | 154295461 | AQP10     | aquaporin 10                     | NM_080429      | C | A  | nonsynonymous SNV | C236A        | A79D             | M9 | D | D | 5.04   |
| 1  | 167095836 | 167095836 | DUSP27    | dual specificity phosphatase     | NM_001080426   | G | A  | nonsynonymous SNV | I1468A       | E490K            | M9 | D | P | 5.36   |
| 1  | 168014350 | 168014350 | DCAF6     | DDB1 and CUL4 associated         | NM_001198956.1 | C | T  | nonsynonymous SNV | C2143T       | P715S            | M9 | T | B | 1.35   |
| 1  | 178442308 | 178442308 | RASAL2    | RAS protein activator like 2     | NM_004841      | C | G  | nonsynonymous SNV | C3354G       | I1118M           | M9 | T | P | 4.78   |
| 1  | 180151396 | 180151396 | QSOX1     | quiescin Q6 sulfhydryl oxidas    | NM_002826.4    | A | G  | nonsynonymous SNV | A694G        | T232A            | M9 | T | B | 2.9    |
| 1  | 183212376 | 183212376 | LAMC2     | laminin, gamma 2                 | NM_005562      | G | A  | nonsynonymous SNV | G3423A       | M1141I           | M9 | T | B | 3.12   |
| 1  | 193051735 | 193051735 | TROVE2    | TROVE domain family, mem         | NM_001042369.2 | C | T  | nonsynonymous SNV | C1361T       | A454V            | M9 | T | D | 5.49   |
| 1  | 197404718 | 197404718 | CRB1      | crumbs family member 1, phc      | NM_201253.2    | G | A  | nonsynonymous SNV | G3725A       | G1242E           | M9 | T | B | 3.51   |
| 1  | 214814895 | 214814895 | CENPF     | centromere protein F, 350/40     | NM_016343      | G | T  | stopgain          | G3214T       | E1072X           | M9 | D |   | 2.97   |
| 1  | 22174196  | 22174196  | HSPG2     | heparan sulfate proteoglycan     | NM_001291860.1 | G | A  | nonsynonymous SNV | C8014T       | P2672S           | M9 | T | D | 5.13   |
| 1  | 235973162 | 235973162 | LYST      | lysosomal trafficking regulato   | NM_000081.3    | G | A  | nonsynonymous SNV | C956T        | P319L            | M9 | D | D | 4.58   |
| 1  | 36205122  | 36205122  | CLSPN     | claspin                          | NM_022111.3    | C | A  | nonsynonymous SNV | G3152T       | R1051M           | M9 | D | P | 4.48   |
| 1  | 36785945  | 36785945  | SH3D21    | SH3 domain containing 21         | NM_001162530.1 | C | T  | nonsynonymous SNV | C1681T       | P561S            | M9 | T | B | -0.322 |
| 1  | 55598227  | 55598227  | USP24     | ubiquitin specific peptidase 2   | NM_015306      | G | T  | stopgain          | C3528A       | Y1176X           | M9 | T |   | 4.33   |
| 1  | 74507484  | 74507484  | LRR1Q3    | leucine-rich repeats and IQ r    | NM_001105659   | A | T  | nonsynonymous SNV | T1131A       | F377L            | M9 | T | B | 0.396  |
| 1  | 82372743  | 82372743  | LPHN2     | adhesion G protein-coupled r     | NM_012302.3    | G | T  | stopgain          | G115T        | E39X             | M9 | D |   | 5.22   |
| 10 | 129908647 | 129908647 | MKI67     | marker of proliferation Ki-67    | NM_002417.4    | C | A  | nonsynonymous SNV | G2411T       | S804I            | M9 | T | B | -9.39  |
| 10 | 26446341  | 26446341  | MYO3A     | myosin IIIA                      | NM_017433      | G | A  | nonsynonymous SNV | G2896A       | E966K            | M9 | T | P | 5.31   |
| 10 | 48389122  | 48389122  | RBP3      | retinol binding protein 3, inter | NM_002900      | C | T  | nonsynonymous SNV | G1756A       | E586K            | M9 | T | B | -2.05  |
| 10 | 50374978  | 50374978  | C10orf128 | chromosome 10 open reading       | NM_001010863.2 | C | T  | nonsynonymous SNV | G174A        | M58I             | M9 | D | B | 2.27   |
| 10 | 50857639  | 50857639  | CHAT      | choline O-acetyltransferase      | NM_020984.3    | G | A  | nonsynonymous SNV | G1114A       | E372K            | M9 | T | B | 5.04   |
| 10 | 54530495  | 54530495  | MBL2      | mannose-binding lectin (prote    | NM_000242      | C | T  | nonsynonymous SNV | G239A        | G80E             | M9 | D | D | 4.98   |
| 10 | 64219504  | 64219504  | ZNF365    | zinc finger protein 365          | NM_199451.2    | G | A  | stopgain          | G929A        | W310X            | M9 | T |   | 1.16   |
| 10 | 96701634  | 96701634  | CYP2C9    | cytochrome P450, family 2, s     | NM_000771      | C | T  | nonsynonymous SNV | C188T        | P63L             | M9 | D | D | 3.56   |
| 11 | 102573737 | 102573737 | MMP27     | matrix metalloproteinase 27      | NM_022122      | C | T  | nonsynonymous SNV | G454A        | G152R            | M9 | D | P | 4.09   |
| 11 | 108380938 | 108380938 | EXPH5     | exophilin 5                      | NM_015065      | C | T  | nonsynonymous SNV | G5296A       | V1766I           | M9 | T | B | -7.63  |
| 11 | 111956142 | 111956142 | TIMM8B    | translocase of inner mitochon    | NM_012459      | C | A  | nonsynonymous SNV | G174T        | K58N             | M9 | T | D | 1.63   |
| 11 | 4127388   | 4127388   | RRM1      | ribonucleotide reductase M1      | NM_001033      | A | G  | nonsynonymous SNV | A226I        | Y74C             | M9 | D | D | 5.77   |
| 11 | 47303131  | 47303131  | MADD      | MAP-kinase activating death      | NM_003682.3    | G | T  | nonsynonymous SNV | G1296T       | L432F            | M9 | T | D | -11.6  |
| 11 | 47510403  | 47510403  | CELF1     | CUGBP, Elav-like family mem      | NM_006560.3    | G | A  | nonsynonymous SNV | C164T        | P55L             | M9 | T | D | 5.69   |
| 11 | 5536979   | 5536979   | UBQLNL    | ubiquilin-like                   | NM_145053      | G | T  | nonsynonymous SNV | C693A        | N231K            | M9 | D | B | -1.8   |
| 11 | 56949505  | 56949505  | LRRC55    | leucine rich repeat containing   | NM_001005210   | C | A  | nonsynonymous SNV | C138A        | D46E             | M9 | T | B | 3.07   |
| 11 | 57175311  | 57175311  | SLC43A3   | solute carrier family 43, mem    | NM_014096.3    | T | G  | nonsynonymous SNV | A1430C       | Y477S            | M9 | T | B | 3.25   |
| 11 | 63532033  | 63532033  | C11orf95  | chromosome 11 open reading       | NM_001144936   | G | T  | nonsynonymous SNV | C1062A       | S354R            | M9 |   |   |        |

|    |           |           |          |                                  |                |   |   |                   |         |        |    |   |     |         |
|----|-----------|-----------|----------|----------------------------------|----------------|---|---|-------------------|---------|--------|----|---|-----|---------|
| 11 | 64375114  | 64375114  | NRXN2    | neurexin 2                       | NM_015080.3    | T | A | nonsynonymous SNV | A4693T  | M1565L | M9 | D | P   | 2.2     |
| 11 | 65418056  | 65418056  | SIPA1    | signal-induced proliferation-a   | NM_153253.29   | C | T | nonsynonymous SNV | C2999T  | G353S  | M9 | T | B   | 4.53    |
| 11 | 70028755  | 70028755  | ANO1     | anoctamin 1, calcium activate    | NM_018043      | G | A | nonsynonymous SNV | G2551A  | D851N  | M9 | T | B   | 4.71    |
| 11 | 76910854  | 76910854  | MYO7A    | myosin VIIA                      | NM_000260.3    | C | T | nonsynonymous SNV | C4843T  | P1615S | M9 | T | B   | 5.06    |
| 11 | 771348    | 771348    | PDDC1    | Parkinson disease 7 domain       | NM_182612      | C | T | nonsynonymous SNV | G529A   | G177S  | M9 | D | D   | 4.44    |
| 11 | 78277192  | 78277192  | NARS2    | asparaginyl-tRNA synthetase      | NM_024678      | G | A | nonsynonymous SNV | C499T   | H167Y  | M9 | D | D   | 5.13    |
| 11 | 84865626  | 84865626  | DLG2     | discs, large homolog 2 (Dros)    | NM_001142699   | C | T | nonsynonymous SNV | G256A   | E86K   | M9 |   | 0 B | 5       |
| 11 | 89133456  | 89133456  | NOX4     | NADPH oxidase 4                  | NM_016931.4    | G | A | nonsynonymous SNV | C938T   | S313L  | M9 |   | 0 B | 5.39    |
| 11 | 9829596   | 9829596   | SBF2     | SET binding factor 2             | NM_030962      | C | T | nonsynonymous SNV | G4394A  | G1465E | M9 | D | P   | 5.91    |
| 12 | 107371376 | 107371376 | MTERF2   | mitochondrial transcription ter  | NM_001033050.2 | G | T | nonsynonymous SNV | C1117A  | P373T  | M9 | D | D   | 5.95    |
| 12 | 11036756  | 11036756  | PRH1     | proline-rich protein HaellI su   | NM_001291314   | C | T | nonsynonymous SNV | G61A    | E21K   | M9 | D |     | -2.49   |
| 12 | 112491427 | 112491427 | NAA25    | N(alpha)-acetyltransferase 25    | NM_024953      | G | A | stopgain          | C1663T  | Q555X  | M9 | T |     | 5.99    |
| 12 | 11420548  | 11420548  | PRB3     | proline-rich protein BstNI sub   | NM_006249      | C | T | nonsynonymous SNV | G635A   | G212E  | M9 | T |     | P 0.287 |
| 12 | 11420611  | 11420611  | PRB3     | proline-rich protein BstNI sub   | NM_006249      | C | T | nonsynonymous SNV | G572A   | G191E  | M9 | D |     | B -1.36 |
| 12 | 11420800  | 11420800  | PRB3     | proline-rich protein BstNI sub   | NM_006249      | C | T | nonsynonymous SNV | G383A   | G128E  | M9 | D |     | P 0.707 |
| 12 | 116421171 | 116421171 | MED13L   | mediator complex subunit 13      | NM_015335      | C | A | nonsynonymous SNV | G4706T  | S1569I | M9 | T | B   | 3.99    |
| 12 | 121471534 | 121471534 | OASL     | 2'-5'-oligoadenylate synthetas   | NM_003733.3    | C | T | nonsynonymous SNV | G211A   | G71R   | M9 | D | D   | 3.63    |
| 12 | 1250795   | 1250795   | ERC1     | ELKS/RAB6-interacting/CAS        | NM_178040.3    | C | T | nonsynonymous SNV | C1579T  | L527F  | M9 | T | D   | 5.73    |
| 12 | 18854659  | 18854659  | PLCZ1    | phospholipase C, zeta 1          | NM_033123      | C | T | nonsynonymous SNV | G916A   | E306K  | M9 | T | P   | 3.5     |
| 12 | 39711887  | 39711887  | KIF21A   | kinesin family member 21A        | NM_001173464.1 | A | G | nonsynonymous SNV | T3896C  | V1299A | M9 | T | P   | 4.69    |
| 12 | 44917186  | 44917186  | NELL2    | neural EGFL like 2               | NM_001145107.1 | C | T | nonsynonymous SNV | G2036A  | R679Q  | M9 | T | D   | 4.93    |
| 12 | 5154412   | 5154412   | KCNA5    | potassium channel, voltage g     | NM_002234      | C | T | nonsynonymous SNV | C1099T  | P367S  | M9 | D | D   | 4.87    |
| 12 | 52761138  | 52761138  | KRT85    | keratin 85, type II              | NM_002283      | A | G | nonsynonymous SNV | T52C    | F18L   | M9 | D | B   | 4.63    |
| 12 | 53444023  | 53444023  | TENC1    | tenascin 2                       | NM_170754      | C | A | nonsynonymous SNV | C54A    | D18E   | M9 | T | B   | 4.46    |
| 12 | 56493812  | 56493812  | ERBB3    | erb-b2 receptor tyrosine kinas   | NM_001982      | G | T | nonsynonymous SNV | G3128T  | G1043V | M9 | T | P   | 4.76    |
| 12 | 57865656  | 57865656  | GLI1     | GLI family zinc finger 1         | NM_005269.2    | A | G | nonsynonymous SNV | A3133G  | T1045A | M9 | T | B   | 5.04    |
| 12 | 71533592  | 71533592  | TSPAN8   | tetraspanin 8                    | NM_004616      | C | T | nonsynonymous SNV | G160A   | V54I   | M9 | T | B   | -1.94   |
| 12 | 81101738  | 81101738  | MYF6     | myogenic factor 6 (herculin)     | NM_002469      | G | A | stopgain          | G240A   | W80X   | M9 | T |     | 4.71    |
| 12 | 98909845  | 98909845  | TMPO     | thymopoietin                     | NM_003276.2    | G | A | nonsynonymous SNV | G200A   | S67N   | M9 | D | D   | 4.51    |
| 13 | 28141800  | 28141800  | LNX2     | ligand of numb-protein X 2       | NM_153371      | G | A | nonsynonymous SNV | C832T   | L278F  | M9 | T | D   | 5.62    |
| 13 | 77713338  | 77713338  | MYCBP2   | MYC binding protein 2, E3 ub     | NM_015057      | G | A | nonsynonymous SNV | C7652T  | P2551L | M9 | D | P   | 5.48    |
| 14 | 105398097 | 105398097 | PLD4     | phospholipase D family, mem      | NM_138790      | G | A | nonsynonymous SNV | G931A   | A311T  | M9 | T | B   | -0.434  |
| 14 | 24526379  | 24526379  | LRRC16B  | leucine rich repeat containing   | NM_138360      | C | T | nonsynonymous SNV | C1066T  | L356F  | M9 | D | D   | 5.12    |
| 14 | 31348664  | 31348664  | COCH     | cochlin                          | NM_001135058.1 | G | T | nonsynonymous SNV | G409T   | A137S  | M9 | T | B   | 3.92    |
| 14 | 64587770  | 64587770  | SYNE2    | spectrin repeat containing, nu   | NM_182914.2    | G | T | nonsynonymous SNV | G13149T | Q4383H | M9 | T | D   | -2.29   |
| 14 | 70634428  | 70634428  | SLC8A3   | solute carrier family 8 (sodium  | NM_183002.2    | G | A | nonsynonymous SNV | C712T   | L238F  | M9 | T | D   | 5.71    |
| 14 | 88945802  | 88945802  | PTPN21   | protein tyrosine phosphatase     | NM_007039      | G | A | nonsynonymous SNV | C1973T  | S658F  | M9 | D | P   | 5.04    |
| 14 | 89085083  | 89085083  | EML5     | echinoderm microtubule assc      | NM_183387      | C | T | nonsynonymous SNV | G5449A  | G1817S | M9 | D | D   | 5.74    |
| 14 | 90752729  | 90752729  | NRDE2    | NRDE-2, necessary for RNA        | NM_017970      | G | A | nonsynonymous SNV | C3266T  | P1089L | M9 | T | P   | 5.59    |
| 14 | 94394604  | 94394604  | FAM181A  | family with sequence similarit   | NM_138344      | G | A | stopgain          | G159A   | W53X   | M9 | T |     | 4.63    |
| 15 | 39884982  | 39884982  | THBS1    | thrombospondin 1                 | NM_003246      | C | T | nonsynonymous SNV | C2746T  | P916S  | M9 | D | D   | 5.3     |
| 15 | 42058627  | 42058627  | MGA      | MGA, MAX dimerization prote      | NM_001164273.1 | C | T | nonsynonymous SNV | C8347T  | L2783F | M9 | T | P   | 3.51    |
| 15 | 64701993  | 64701993  | TRIP4    | thyroid hormone receptor inte    | NM_016213      | G | A | nonsynonymous SNV | G1009A  | E337K  | M9 | T | B   | 4.9     |
| 15 | 65391965  | 65391965  | UBAP1L   | ubiquitin associated protein 1   | NM_001163692   | C | G | nonsynonymous SNV | G787C   | D263H  | M9 | D | D   | 5.4     |
| 15 | 68612707  | 68612707  | ITGA11   | integrin, alpha 11               | NM_001004439   | C | T | nonsynonymous SNV | G2432A  | R811K  | M9 | T | B   | 4.7     |
| 15 | 75557697  | 75557697  | GOLGA6C  | golgin A6 family, member C       | NM_001164404   | G | A | nonsynonymous SNV | G691A   | E231K  | M9 | T | B   | -0.334  |
| 15 | 89010418  | 89010418  | MRPL46   | mitochondrial ribosomal prote    | NM_022163      | G | T | nonsynonymous SNV | C191A   | T64N   | M9 | T | B   | 0.789   |
| 16 | 1129868   | 1129868   | SSTR5    | somatostatin receptor 5          | NM_001053.3    | G | A | nonsynonymous SNV | G1000A  | E334K  | M9 | T | B   | 4.49    |
| 16 | 1545618   | 1545618   | TELO2    | telomere maintenance 2           | NM_016111      | C | T | nonsynonymous SNV | C607T   | L203F  | M9 | T | D   | 5.33    |
| 16 | 24950860  | 24950860  | ARHGAP17 | Rho GTPase activating protei     | NM_001006634   | T | C | nonsynonymous SNV | A1549G  | K517E  | M9 | T | D   | 5       |
| 16 | 27549603  | 27549603  | GTF3C1   | general transcription factor III | NM_001520.3    | G | A | nonsynonymous SNV | C506T   | P169L  | M9 | T | P   | 5.5     |
| 16 | 2905806   | 2905806   | PRSS22   | protease, serine, 22             | NM_022119      | G | C | nonsynonymous SNV | C328G   | Q110E  | M9 | T | B   | 2.21    |
| 16 | 30736315  | 30736315  | SRCAP    | Snf2-related CREBBP activat      | NM_006862      | C | T | nonsynonymous SNV | C5570T  | P1857L | M9 | T | D   | 5.91    |
| 16 | 630868    | 630868    | PIGQ     | phosphatidylinositol glycan ar   | NM_148920.2    | T | A | nonsynonymous SNV | T1427A  | L476Q  | M9 | D | D   | 5.22    |
| 16 | 67854818  | 67854818  | TSNAXIP1 | translin-associated factor X ir  | NM_001288990.1 | G | A | nonsynonymous SNV | G224A   | R75Q   | M9 | T | B   | 3.03    |
| 16 | 68941449  | 68941449  | TANGO6   | transport and golgi organizati   | NM_024562      | G | T | nonsynonymous SNV | G1771T  | A591S  | M9 | T | D   | 5.56    |
| 16 | 71713321  | 71713321  | PHLPP2   | PH domain and leucine rich r     | NM_015020.3    | G | T | nonsynonymous SNV | C1008A  | D336E  | M9 | T | B   | 2.93    |
| 16 | 848768    | 848768    | GNG13    | guanine nucleotide binding pi    | NM_016541      | A | C | nonsynonymous SNV | T155A   | L52Q   | M9 | T | D   | 5.07    |
| 17 | 10429959  | 10429959  | MYH2     | myosin, heavy chain 2, skelel    | NM_017534.5    | C | T | nonsynonymous SNV | G4144A  | E1382K | M9 | D | D   | 5.2     |
| 17 | 26887110  | 26887110  | PIGS     | phosphatidylinositol glycan ar   | NM_033198      | A | G | nonsynonymous SNV | T776C   | L259P  | M9 | D | D   | 5.84    |
| 17 | 29562746  | 29562746  | NF1      | neurofibromin 1                  | NM_001042492   | C | T | stopgain          | C3826T  | R1276X | M9 | T |     | 5.15    |
| 17 | 39316677  | 39316677  | KRTAP4-4 | keratin associated protein 4-4   | NM_032524      | T | G | nonsynonymous SNV | A267C   | Q89H   | M9 | D | B   | -2.2    |
| 17 | 39525831  | 39525831  | KRT33B   | keratin 33B, type I              | NM_002279      | C | T | nonsynonymous SNV | G172A   | E58K   | M9 | D | D   | 4.44    |
| 17 | 39977230  | 39977230  | FKBP10   | FK506 binding protein 10, 65     | NM_021939      | C | T | nonsynonymous SNV | C1288T  | L430F  | M9 | D | D   | 3.22    |
| 17 | 41143029  | 41143029  | RUNDC1   | RUN domain containing 1          | NM_173079      | C | G | nonsynonymous SNV | C1138G  | P380A  | M9 | T | B   | 4.28    |
| 17 | 41477288  | 41477288  | ARL4D    | ADP-ribosylation factor-like 4   | NM_001661      | C | T | nonsynonymous SNV | C188T   | P63L   | M9 | D | B   | 3.82    |
| 17 | 44095984  | 44095984  | MAPT     | microtubule-associated protei    | NM_001123066.3 | G | A | nonsynonymous SNV | G2003A  | G668E  | M9 | D | D   | 5.02    |

|    |           |           |          |                                 |                |   |   |                   |         |         |    |   |   |        |
|----|-----------|-----------|----------|---------------------------------|----------------|---|---|-------------------|---------|---------|----|---|---|--------|
| 17 | 73491064  | 73491064  | KIAA0195 | KIAA0195                        | NM_014738      | C | A | nonsynonymous SNV | C2677A  | P893T   | M9 | T | B | 5.79   |
| 17 | 79517454  | 79517454  | C17orf70 | Fanconi anemia core comple      | NM_025161      | C | T | nonsynonymous SNV | G1066A  | G356S   | M9 | T | B | -1.86  |
| 17 | 8007492   | 8007492   | ALOXE3   | arachidonate lipoxygenase 3     | NM_001165960.1 | A | G | nonsynonymous SNV | T2122C  | F708L   | M9 | D | D | 4.57   |
| 18 | 31324974  | 31324974  | ASXL3    | additional sex combs like trar  | NM_030632      | C | T | nonsynonymous SNV | C5162T  | S1721F  | M9 | D | D | 5.86   |
| 19 | 12125781  | 12125781  | ZNF433   | zinc finger protein 433         | NM_001080411   | C | A | nonsynonymous SNV | G1901T  | E652D   | M9 | T | B | 0.343  |
| 19 | 14499537  | 14499537  | CD97     | adhesion G protein-coupled r    | NM_078481      | A | G | nonsynonymous SNV | A97G    | N33D    | M9 | T | B | 0.967  |
| 19 | 21992253  | 21992253  | ZNF43    | zinc finger protein 43          | NM_001256648.1 | G | A | nonsynonymous SNV | C568T   | H190Y   | M9 | T | B | 0.283  |
| 19 | 36216411  | 36216411  | KMT2B    | lysine (K)-specific methyltran  | NM_014727      | T | C | nonsynonymous SNV | T3674C  | F1225S  | M9 | D | D | 5.54   |
| 19 | 41355828  | 41355828  | CYP2A6   | cytochrome P450, family 2, s    | NM_000762      | C | T | nonsynonymous SNV | G238A   | V80M    | M9 | T | P | 2.72   |
| 19 | 43372986  | 43372986  | PSG1     | pregnancy specific beta-1-gly   | NM_001297773.1 | C | T | nonsynonymous SNV | G910A   | E304K   | M9 | D | D | 0.535  |
| 19 | 49671906  | 49671906  | TRPM4    | transient receptor potential ca | NM_017636.3    | G | A | nonsynonymous SNV | G709A   | D237N   | M9 | T | P | 4.49   |
| 19 | 49913070  | 49913070  | CCDC155  | coiled-coil domain containing   | NM_144688      | G | A | nonsynonymous SNV | G1207A  | E403K   | M9 | T | P | 3.9    |
| 19 | 50193376  | 50193376  | ADM5     | adrenomedullin 5 (putative)     | NM_001101340   | C | A | nonsynonymous SNV | C88A    | Q30K    | M9 | D | P | 1.45   |
| 19 | 55607508  | 55607508  | PPP1R12C | protein phosphatase 1, regul    | NM_017607.3    | G | A | nonsynonymous SNV | C1064T  | S355F   | M9 | T | D | 4.59   |
| 19 | 5687908   | 5687908   | HSD11B1L | hydroxysteroid (11-beta) dehy   | NM_001267870   | G | A | nonsynonymous SNV | G478A   | G160S   | M9 |   |   |        |
| 19 | 7830731   | 7830731   | CLEC4M   | C-type lectin domain family 4   | NM_014257.4    | G | T | nonsynonymous SNV | G422T   | R141L   | M9 | T | B | -1.81  |
| 19 | 9058414   | 9058414   | MUC16    | mucin 16, cell surface associ   | NM_024690      | G | A | nonsynonymous SNV | C29032T | P9678S  | M9 | D | B | -6.24  |
| 19 | 9075243   | 9075243   | MUC16    | mucin 16, cell surface associ   | NM_024690      | G | A | nonsynonymous SNV | C12203T | S4068L  | M9 | D | B | 0.103  |
| 19 | 9086161   | 9086161   | MUC16    | mucin 16, cell surface associ   | NM_024690      | G | A | nonsynonymous SNV | C5654T  | S1885F  | M9 | D | D | 0.225  |
| 2  | 113416608 | 113416608 | SLC20A1  | solute carrier family 20 (phos  | NM_005415      | G | A | nonsynonymous SNV | G985A   | E329K   | M9 | T | B | 5.9    |
| 2  | 128262665 | 128262665 | IWS1     | IWS1 homolog (S. cerevisiae     | NM_017969      | G | A | stopgain          | C814T   | R272X   | M9 | T |   | 4.84   |
| 2  | 139322555 | 139322555 | SPOPL    | speckle-type POZ protein-like   | NM_001001664   | G | A | stopgain          | G1026A  | W342X   | M9 |   |   | 3.93   |
| 2  | 166231294 | 166231294 | SCN2A    | sodium channel, voltage gate    | NM_021007.2    | C | T | nonsynonymous SNV | C4072T  | L1358F  | M9 | D | D | 4.41   |
| 2  | 17697627  | 17697627  | RAD51AP2 | RAD51 associated protein 2      | NM_001099218   | C | T | nonsynonymous SNV | G2056A  | E686K   | M9 | D | B | -0.446 |
| 2  | 176987569 | 176987569 | HOXD9    | homeobox D9                     | NM_014213      | C | A | nonsynonymous SNV | C73A    | L25I    | M9 | T | B | 4.3    |
| 2  | 179456753 | 179456753 | TTN      | titin                           | NM_001267550   | C | A | nonsynonymous SNV | G59878T | G19960C | M9 | D | D | 6.03   |
| 2  | 179613473 | 179613473 | TTN      | titin                           | NM_133379      | C | T | nonsynonymous SNV | G13654A | E4552K  | M9 | T | B | 0.829  |
| 2  | 207173658 | 207173658 | ZDBF2    | zinc finger, DBF-type contain   | NM_020923.2    | C | T | nonsynonymous SNV | C4406T  | P1469L  | M9 | D | P | 2.84   |
| 2  | 219000551 | 219000551 | CXCR2    | chemokine (C-X-C motif) rec     | NM_001557.3    | G | A | nonsynonymous SNV | G1027A  | D343N   | M9 |   | B | 4.46   |
| 2  | 228846549 | 228846549 | SPHKAP   | SPHK1 interactor, AKAP dom      | NM_001142644.1 | G | A | nonsynonymous SNV | C4987T  | R1663W  | M9 | D | P | 5.85   |
| 2  | 24413336  | 24413336  | FAM228A  | family with sequence similarit  | NM_001040710   | G | A | nonsynonymous SNV | G457A   | A153T   | M9 | T | B | -6.61  |
| 2  | 85924668  | 85924668  | GNLY     | granulysin                      | NM_006433      | G | A | nonsynonymous SNV | G295A   | G99R    | M9 | T | B | -4.21  |
| 2  | 88409904  | 88409904  | SMYD1    | SET and MYND domain conti       | NM_198274      | G | A | nonsynonymous SNV | G1346A  | R449H   | M9 | T | P | 5.41   |
| 20 | 44596264  | 44596264  | ZNF335   | zinc finger protein 335         | NM_022095      | G | A | nonsynonymous SNV | C824T   | A275V   | M9 | T | B | 4.78   |
| 20 | 62338017  | 62338017  | ARFRP1   | ADP-ribosylation factor relate  | NM_003224.5    | G | A | nonsynonymous SNV | C167T   | T56I    | M9 | D | D | 4.92   |
| 20 | 62614539  | 62614539  | PRPF6    | pre-mRNA processing factor 1    | NM_012469      | G | A | nonsynonymous SNV | G211A   | E71K    | M9 | T | P | 5.22   |
| 21 | 19666683  | 19666683  | TMPRSS15 | transmembrane protease, sei     | NM_002772      | G | A | nonsynonymous SNV | C2390T  | P797L   | M9 |   | D | 5.79   |
| 21 | 41459131  | 41459131  | DSCAM    | Down syndrome cell adhesio      | NM_001389.3    | C | T | nonsynonymous SNV | G3934A  | D1312N  | M9 | T | D | 4.71   |
| 21 | 47754641  | 47754641  | PCNT     | pericentrin                     | NM_006031      | A | T | nonsynonymous SNV | A598T   | I200F   | M9 | T | B | -0.47  |
| 22 | 23915574  | 23915574  | IQLL1    | immunoglobulin lambda-like f    | NM_020070      | G | A | nonsynonymous SNV | C521T   | A174V   | M9 | T | B | -4.9   |
| 22 | 24379386  | 24379386  | GSTT1    | glutathione S-transferase the   | NM_000853      | C | T | nonsynonymous SNV | G326A   | S109N   | M9 | T | B | -1.94  |
| 22 | 26164985  | 26164985  | MYO18B   | myosin XVIIIIB                  | NM_032608      | G | A | nonsynonymous SNV | G1102A  | D368N   | M9 | T | B | 0.318  |
| 22 | 26423366  | 26423366  | MYO18B   | myosin XVIIIIB                  | NM_032608      | G | A | nonsynonymous SNV | G7426A  | E2476K  | M9 | D | B | 2.7    |
| 22 | 33733727  | 33733727  | LARGE    | like-glycosyltransferase        | NM_004737.4    | G | A | nonsynonymous SNV | C1192T  | R398C   | M9 | D | D | 4.21   |
| 22 | 38130829  | 38130829  | TRIOBP   | TRIO and F-actin binding pro    | NM_01039141    | G | A | nonsynonymous SNV | G4486A  | E1496K  | M9 | D | B | 4.25   |
| 22 | 39085040  | 39085040  | JOSD1    | Josephin domain containing      | NM_014876      | T | A | nonsynonymous SNV | A409T   | R137W   | M9 | D | D | 5.63   |
| 3  | 121647356 | 121647356 | SLC15A2  | solute carrier family 15 (oligo | NM_021082.3    | G | A | nonsynonymous SNV | G1295A  | G432E   | M9 | T | D | 2.79   |
| 3  | 127295837 | 127295837 | TPRA1    | transmembrane protein, adipi    | NM_001136053.2 | T | A | nonsynonymous SNV | A341T   | D114V   | M9 | D | D | 4.33   |
| 3  | 132345585 | 132345585 | ACAD11   | acyl-CoA dehydrogenase farr     | NM_032169      | G | A | nonsynonymous SNV | C1147T  | L383F   | M9 | T | D | 5.31   |
| 3  | 138413734 | 138413734 | PIK3CB   | phosphatidylinositol-4,5-bispi  | NM_006219.2    | G | T | nonsynonymous SNV | C1786A  | Q596K   | M9 | T | B | 5.04   |
| 3  | 164735772 | 164735772 | SI       | sucrase-isomaltase (alpha-gli   | NM_001041      | T | C | nonsynonymous SNV | A3506G  | N1169S  | M9 | D | D | 5.17   |
| 3  | 179051969 | 179051969 | ZNF639   | zinc finger protein 639         | NM_016331      | A | G | nonsynonymous SNV | A1217G  | D406G   | M9 | T | D | 5.78   |
| 3  | 184953248 | 184953248 | EHHADH   | enoyl-CoA, hydratase/3-hydr     | NM_001966      | C | A | nonsynonymous SNV | G181T   | A61S    | M9 | D | D | 5.2    |
| 3  | 193042697 | 193042697 | ATP13A5  | ATPase type 13A5                | NM_198505      | G | C | nonsynonymous SNV | C1630G  | Q544E   | M9 | T | D | 5.34   |
| 3  | 37067242  | 37067242  | MLH1     | mutL homolog 1                  | NM_000249.3    | C | T | nonsynonymous SNV | C1153T  | R385C   | M9 | D | D | 5.67   |
| 3  | 38647551  | 38647551  | SCN5A    | sodium channel, voltage gate    | NM_198056.2    | G | A | nonsynonymous SNV | C1229T  | A410V   | M9 | D | D | 5.54   |
| 3  | 40557940  | 40557940  | ZNF620   | zinc finger protein 620         | NM_175888.3    | C | A | stopgain          | C855A   | C285X   | M9 |   |   | -5.66  |
| 3  | 44308497  | 44308497  | TOPAZ1   | testis and ovary specific PAZ   | NM_001145030   | C | A | nonsynonymous SNV | C3029A  | S1010Y  | M9 | D | P | 2.26   |
| 3  | 50009492  | 50009492  | RBM6     | RNA binding motif protein 6     | NM_005777      | G | T | nonsynonymous SNV | G1324T  | D442Y   | M9 |   | D | 5.69   |
| 3  | 51864605  | 51864605  | IQCF3    | IQ motif containing F3          | NM_001085479.2 | G | A | nonsynonymous SNV | G253A   | V85I    | M9 | T | B | -9.45  |
| 3  | 51895692  | 51895692  | IQCF2    | IQ motif containing F2          | NM_203424      | C | T | stopgain          | C10T    | R4X     | M9 | T |   | 0 -2.8 |
| 3  | 57488191  | 57488191  | DNAH12   | Dynein, axonemal, heavy che     | NM_198564      | G | A | nonsynonymous SNV | C1102T  | P368S   | M9 | T | B | 2.24   |
| 3  | 74570229  | 74570229  | CNTN3    | Contactin 3 (plasmacytoma a     | NM_020872      | G | A | nonsynonymous SNV | C35T    | S12L    | M9 | T | B | 5.2    |
| 3  | 98002107  | 98002107  | OR5H2    | Olfactory receptor, family 5, s | NM_001005482   | G | A | nonsynonymous SNV | G376A   | D126N   | M9 | D | D | 2.31   |
| 4  | 103578946 | 103578946 | MANBA    | Mannosidase, beta A, lysosom    | NM_005908      | A | T | nonsynonymous SNV | T1597A  | F533I   | M9 | D | P | 5.32   |
| 4  | 15937750  | 15937750  | FGFBP1   | Fibroblast growth factor bindi  | NM_005130      | G | A | nonsynonymous SNV | C506T   | S169F   | M9 | D | B | 0.561  |
| 4  | 166915602 | 166915602 | TLL1     | Tolloid-like 1                  | NM_012464      | G | A | nonsynonymous SNV | G431A   | R144Q   | M9 | D | D | 5.51   |

|   |           |           |           |                                 |              |   |   |                   |         |        |    |   |   |        |
|---|-----------|-----------|-----------|---------------------------------|--------------|---|---|-------------------|---------|--------|----|---|---|--------|
| 4 | 166978441 | 166978441 | TLL1      | Tolloid-like 1                  | NM 012464    | C | T | nonsynonymous SNV | C1826T  | P609L  | M9 | T | D | 5.13   |
| 4 | 183674657 | 183674657 | TENM3     | Teneurin transmembrane pro      | NM 001080477 | G | A | nonsynonymous SNV | G3917A  | R1306K | M9 | D | D | 5.65   |
| 4 | 183674669 | 183674669 | TENM3     | Teneurin transmembrane pro      | NM 001080477 | A | C | nonsynonymous SNV | A3929C  | Q1310P | M9 | T | B | 4.44   |
| 4 | 183714955 | 183714955 | TENM3     | Teneurin transmembrane pro      | NM 001080477 | A | G | nonsynonymous SNV | A7130G  | K2377R | M9 | T | B | 3.69   |
| 4 | 189022345 | 189022345 | TRIML2    | Tripartite motif family-like 2  | NM 173553    | C | A | nonsynonymous SNV | G195T   | L65F   | M9 | T | P | 3.33   |
| 4 | 22414813  | 22414813  | GPR125    | adhesion G protein-coupled r    | NM 145290    | C | A | nonsynonymous SNV | G2224T  | V742F  | M9 | D | D | 5.49   |
| 4 | 77661967  | 77661967  | SHROOM3   | Shroom family member 3          | NM 020859    | C | T | nonsynonymous SNV | C2641T  | P881S  | M9 | T | B | 4.48   |
| 4 | 79308532  | 79308532  | FRAS1     | Fraser extracellular matrix co  | NM 025074    | C | T | nonsynonymous SNV | C3652T  | P1218S | M9 | D | D | 5.6    |
| 4 | 79443916  | 79443916  | FRAS1     | Fraser extracellular matrix co  | NM 025074    | T | G | nonsynonymous SNV | T10762G | F3588V | M9 | D | B | 5.81   |
| 4 | 80328964  | 80328964  | GK2       | Glycerol kinase 2               | NM 033214    | G | A | nonsynonymous SNV | C391T   | P131S  | M9 | T | B | 3.76   |
| 5 | 110448846 | 110448846 | WDR36     | WD repeat domain 36             | NM 139281    | C | T | nonsynonymous SNV | C1958T  | S653F  | M9 | D | D | 5.76   |
| 5 | 11346487  | 11346487  | CTNND2    | Catenin (cadherin-associated    | NM 001288717 | G | A | nonsynonymous SNV | C326T   | P109L  | M9 | D | P | 5.71   |
| 5 | 11346488  | 11346488  | CTNND2    | Catenin (cadherin-associated    | NM 001288717 | G | A | nonsynonymous SNV | C325T   | P109S  | M9 | D | B | 5.71   |
| 5 | 121761218 | 121761218 | SNCAIP    | Synuclein, alpha interacting p  | NM 001242935 | G | T | nonsynonymous SNV | G1174T  | A392S  | M9 | T | D | 5.67   |
| 5 | 13716648  | 13716648  | DNAH5     | Dynein, axonemal, heavy cha     | NM 001369    | C | T | nonsynonymous SNV | G12857A | G4286E | M9 | D | P | 5.53   |
| 5 | 149629841 | 149629841 | CAMK2A    | Calcium/calmodulin-depende      | NM 171825    | C | G | nonsynonymous SNV | G848C   | R283T  | M9 | D | D | 5.38   |
| 5 | 153078566 | 153078566 | GRIA1     | Glutamate receptor, ionotropi   | NM 000827    | G | A | nonsynonymous SNV | G1385A  | G462E  | M9 | D | D | 5.44   |
| 5 | 161116720 | 161116720 | GABRA6    | Gamma-aminobutyric acid (G      | NM 000811    | C | T | nonsynonymous SNV | C608T   | S203L  | M9 | T | P | 5.41   |
| 5 | 167891720 | 167891720 | WWC1      | WW and C2 domain containir      | NM 001161661 | C | G | nonsynonymous SNV | C2921G  | S974C  | M9 | T | B | 1.97   |
| 5 | 168180975 | 168180975 | SLIT3     | slit homolog 3                  | NM 001271946 | C | T | nonsynonymous SNV | G1723A  | G575R  | M9 | D | D | 5.31   |
| 5 | 175813910 | 175813910 | NOP16     | NOP16 nucleolar protein         | NM 001256539 | C | T | nonsynonymous SNV | G217A   | V73M   | M9 | D | D | 5.42   |
| 5 | 61875707  | 61875707  | LRRRC70   | Leucine rich repeat containi    | NM 181506    | C | T | nonsynonymous SNV | C442T   | P148S  | M9 | T | B | -0.296 |
| 5 | 840644    | 840644    | ZDHHC11   | Zinc finger, DHHC-type conta    | NM 024786    | G | C | nonsynonymous SNV | C750G   | H250Q  | M9 | T | B | -0.394 |
| 5 | 86685331  | 86685331  | RASA1     | RAS p21 protein activator       | NM 002890    | G | A | nonsynonymous SNV | G3047A  | R1016H | M9 | T | P | 5.75   |
| 5 | 90050857  | 90050857  | GPR98     | Adhesion G protein-coupled r    | NM 032119    | T | C | nonsynonymous SNV | T11435C | I3812T | M9 | D | B | 5.73   |
| 6 | 109483990 | 109483990 | CEP57L1   | Centrosomal protein 57kDa-II    | NM 001271852 | G | C | nonsynonymous SNV | G1200T  | M400I  | M9 | T | B | 4.28   |
| 6 | 150710577 | 150710577 | IYD       | Iodotyrosine deiodinase         | NM 001164694 | T | C | nonsynonymous SNV | T268C   | S90P   | M9 | D | D | 2.93   |
| 6 | 43745314  | 43745314  | VEGFA     | vascular endothelial growth fa  | NM 001025366 | C | T | nonsynonymous SNV | C767T   | S256F  | M9 | D | D | 4.77   |
| 6 | 46979767  | 46979767  | GPR110    | Adhesion G Protein-Coupled      | NM 153840    | G | T | nonsynonymous SNV | C1092A  | F364L  | M9 | T | B | 3.17   |
| 7 | 121650421 | 121650421 | PTPRZ1    | Protein tyrosine phosphatase    | NM 001206838 | G | T | nonsynonymous SNV | G1321T  | A441S  | M9 | T | B | -3.99  |
| 7 | 12617689  | 12617689  | SCIN      | Scinderin                       | NM 001112706 | G | A | nonsynonymous SNV | G200A   | G67E   | M9 | D | D | 4.91   |
| 7 | 138437531 | 138437531 | ATP6V0A4  | ATPase, H+ transporting, lysc   | NM 020632    | C | A | nonsynonymous SNV | G868T   | A290S  | M9 | T | B | 2.78   |
| 7 | 140373452 | 140373452 | ADCK2     | AarF Domain Containing Kin      | NM 052853    | G | A | nonsynonymous SNV | G322A   | V108M  | M9 | T | B | 0.255  |
| 7 | 141752660 | 141752660 | MGAM      | Maltase-Glucoamylase            | NM 004668    | C | T | nonsynonymous SNV | C3035T  | S1012F | M9 | D | P | 4.2    |
| 7 | 150499315 | 150499315 | TMEM176A  | Transmembrane Protein 176/      | NM 018487    | G | A | nonsynonymous SNV | G187A   | V63M   | M9 | D | B | 0.671  |
| 7 | 150741103 | 150741103 | ABC8B     | TP-binding cassette, sub-fam    | NM 001282291 | C | T | nonsynonymous SNV | C1862T  | A621V  | M9 | D | D | 4.89   |
| 7 | 155537826 | 155537826 | RBM33     | RNA Binding Motif Protein 33    | NM 053043    | C | G | nonsynonymous SNV | C2509G  | P837A  | M9 | T | B | 1.95   |
| 7 | 156752603 | 156752603 | NOM1      | Nucleolar Protein With MIF4     | NM 138400    | G | A | nonsynonymous SNV | G1367A  | G456E  | M9 | T | B | 4.93   |
| 7 | 29994949  | 29994949  | SCRN1     | Secernin 1                      | NM 001145514 | G | A | nonsynonymous SNV | C247T   | P83S   | M9 | B | D | 5.7    |
| 7 | 36895167  | 36895167  | ELMO1     | engulfment and cell motility 1  | NM 001206480 | C | A | nonsynonymous SNV | G2173T  | D725Y  | M9 | D | P | 4.77   |
| 7 | 50611657  | 50611657  | DDC       | Dopa decarboxylase (aromat      | NM 01082971  | G | A | nonsynonymous SNV | C127T   | P43S   | M9 | D | D | 5.92   |
| 7 | 72416199  | 72416199  | POM121    | POM121 transmembrane nuc        | NM 001257190 | G | A | nonsynonymous SNV | G2809A  | G937R  | M9 | D | P | 3.16   |
| 7 | 82582489  | 82582489  | PCLO      | Piccolo presynaptic cytomatri   | NM 033026    | C | T | nonsynonymous SNV | G7780A  | D2594N | M9 | D | D | 4.8    |
| 8 | 108359286 | 108359286 | ANGPT1    | Angiopoietin 1                  | NM 001146    | C | T | nonsynonymous SNV | G337A   | A113T  | M9 | T | B | 5.95   |
| 8 | 121522268 | 121522268 | MTBP      | MDM2 binding protein            | NM 022045    | G | A | nonsynonymous SNV | G1978A  | E660K  | M9 | D | D | 6.07   |
| 8 | 134063092 | 134063092 | SLA       | Src-like-adaptor                | NM 006748    | G | A | nonsynonymous SNV | C250T   | R84C   | M9 | T | D | 4.53   |
| 8 | 145731960 | 145731960 | GPT       | Glutamic-pyruvate transamin;    | NM 005309    | T | C | nonsynonymous SNV | T1208C  | I403T  | M9 | D | P | 4.54   |
| 8 | 24242027  | 24242027  | ADAMDEC1  | ADAM-like, decysin 1            | NM 014479    | G | A | nonsynonymous SNV | G10A    | G4R    | M9 | T | B | 1.87   |
| 8 | 28635402  | 28635402  | INTS9     | Integrator complex subunit 9    | NM 018250    | G | A | nonsynonymous SNV | C1339T  | P447S  | M9 | T | D | 5.28   |
| 8 | 30703646  | 30703646  | TEX15     | Testis expressed 15             | NM 031271    | C | T | nonsynonymous SNV | G2888A  | R963Q  | M9 | D | P | 4.75   |
| 8 | 3443732   | 3443732   | CSMD1     | CUB and Sushi multiple dom;     | NM 033225    | C | T | nonsynonymous SNV | G1148A  | G383E  | M9 | D | D | 5.77   |
| 8 | 37732756  | 37732756  | RAB11FIP1 | RAB11 family interacting prot   | NM 001002814 | G | A | nonsynonymous SNV | C899T   | S300F  | M9 | D | D | 5.13   |
| 8 | 37985941  | 37985941  | ASH2L     | Ash2 (absent, small, or home    | NM 004674    | A | G | nonsynonymous SNV | A1298G  | D433G  | M9 | T | B | 4.62   |
| 8 | 41790698  | 41790698  | KAT6A     | K(lysine) acetyltransferase 6A  | NM 001099412 | T | A | nonsynonymous SNV | A5040T  | Q1680H | M9 | D | B | 0.465  |
| 8 | 43152560  | 43152560  | POTEA     | POTE ankyrin domain family,     | NM 001005365 | A | T | nonsynonymous SNV | A546T   | K182N  | M9 |   |   |        |
| 8 | 81889089  | 81889089  | PAG1      | Phosphoprotein membrane a       | NM 018440    | G | A | nonsynonymous SNV | C989T   | S330L  | M9 | T | B | 1.53   |
| 8 | 104432571 | 104432571 | GRIN3A    | Glutamate receptor, ionotropi   | NM 133445    | C | T | nonsynonymous SNV | G2123A  | R708Q  | M9 | T | D | 5.39   |
| 9 | 105767730 | 105767730 | CYLC2     | Cylicin, basic protein of sperm | NM 001340    | G | A | nonsynonymous SNV | G817A   | D273N  | M9 | T | P | 3.69   |
| 9 | 115456415 | 115456415 | INIP      | INTS3 and NABP interacting      | NM 021218    | C | A | nonsynonymous SNV | G124T   | A42S   | M9 | D | D | 5.6    |
| 9 | 122075589 | 122075589 | BRINP1    | Bone Morphogenetic Protein/     | NM 014618    | C | T | stopgain          | G45A    | W15X   | M9 | T |   | 5.39   |
| 9 | 123739159 | 123739159 | C5        | Complement Component 5          | NM 001735    | C | T | stopgain          | G3683A  | W1228X | M9 | T |   | 5.66   |
| 9 | 125315999 | 125315999 | OR1N2     | Olfactory Receptor, Family 1,   | NM 001004457 | C | T | nonsynonymous SNV | C551T   | A184V  | M9 | D | B | 0.204  |
| 9 | 130605443 | 130605443 | ENG       | Endoglin                        | NM 001114753 | G | A | nonsynonymous SNV | C149T   | S50L   | M9 | T | B | 4.23   |
| 9 | 134019675 | 134019675 | NUP214    | Nucleoporin 214kDa              | NM 005085    | C | T | nonsynonymous SNV | C1303T  | P435S  | M9 | T | B | 4.67   |
| 9 | 137715314 | 137715314 | COL5A1    | Collagen, type V, alpha 1       | NM 000093    | C | A | nonsynonymous SNV | C4697A  | P1566Q | M9 | D | D | 5.14   |
| 9 | 32633060  | 32633060  | TAF1L     | TAF1 RNA Polymerase II, TA      | NM 153809    | G | A | nonsynonymous SNV | C2518T  | R840W  | M9 | D | D | 1.19   |
| 9 | 35042957  | 35042957  | C9orf131  | Chromosome 9 open reading       | NM 001040410 | G | A | nonsynonymous SNV | G226A   | E76K   | M9 | T | B | 0.151  |

|    |           |           |           |                                 |              |   |    |                   |              |                  |    |   |   |        |
|----|-----------|-----------|-----------|---------------------------------|--------------|---|----|-------------------|--------------|------------------|----|---|---|--------|
| 9  | 35650537  | 35650537  | SIT1      | Signaling Threshold Regulati    | NM_014450    | C | A  | nonsynonymous SNV | G198T        | W66C             | M9 | T | B | 1.93   |
| 9  | 36105250  | 36105250  | RECK      | Reversion-Inducing-Cysteine     | NM_021111    | G | A  | nonsynonymous SNV | G1546A       | D516N            | M9 | T | B | 5.34   |
| 9  | 74489983  | 74489983  | ABHD17B   | Abhydrolase domain containi     | NM_001025780 | G | A  | nonsynonymous SNV | C14T         | S5L              | M9 | D | P | 5.93   |
| 9  | 90501587  | 90501587  | SPATA31E1 | SPATA31 subfamily E, memb       | NM_178828    | G | T  | nonsynonymous SNV | G2185T       | A729S            | M9 | T | B | -0.747 |
| X  | 102004582 | 102004582 | BHLHB9    | Basic helix-loop-helix domain   | NM_001142524 | G | A  | stopgain          | G659A        | W220X            | M9 |   |   | 4.35   |
| X  | 102004583 | 102004583 | BHLHB9    | Basic helix-loop-helix domain   | NM_001142524 | G | A  | stopgain          | G660A        | W220X            | M9 |   |   | 4.35   |
| X  | 103268115 | 103268115 | H2BFWT    | 2B histone family, member W     | NM_001002916 | C | T  | nonsynonymous SNV | G118A        | E40K             | M9 | T | B | 1.56   |
| X  | 114141258 | 114141258 | HTR2C     | 5-hydroxytryptamine (seroton    | NM_001256761 | C | T  | nonsynonymous SNV | C562T        | L188F            | M9 | D | B | 4.87   |
| X  | 48319389  | 48319389  | SLC38A5   | Solute carrier family 38, mem   | NM_033518    | C | T  | nonsynonymous SNV | G935A        | G312E            | M9 | D | D | 4.24   |
| X  | 48762537  | 48762537  | SLC35A2   | Solute carrier family 35 (UDP   | NM_001282651 | C | T  | nonsynonymous SNV | G733A        | G245S            | M9 | T | D | 5.33   |
| X  | 53280139  | 53280139  | IQSEC2    | IQ motif and Sec7 domain 2      | NM_015075    | T | G  | nonsynonymous SNV | A1004C       | Q335P            | M9 | T | B | 4.26   |
| X  | 84362485  | 84362485  | SATL1     | Spermidine/spermine N1-ace      | NM_001012980 | T | A  | nonsynonymous SNV | A1490T       | N497I            | M9 | T | B | -2.54  |
| X  | 99662155  | 99662155  | PCDH19    | Protocadherin 19                | NM_001184880 | C | T  | nonsynonymous SNV | G1441A       | D481N            | M9 | D | D | 5.64   |
| 7  | 140453136 | 140453136 | BRAF      | v-raf murine sarcoma viral or   | NM_004333    | A | T  | nonsynonymous SNV | T1799A       | V600E            | M9 | D | D | 5.65   |
| 7  | 100645960 | 100645960 | MUC12     | Mucin12                         | NM_001164462 | A | T  | nonsynonymous SNV | A12116T      | D4039V           | M9 | T |   | -1.72  |
| 1  | 248801602 | 248801602 | OR2T35    | Olfactory Receptor Family 2, s  | NM_001001827 | 0 | CA | stopgain          | 957_958insTG | I320_R321delinsX | M9 |   |   |        |
| 12 | 109017374 | 109017374 | SELPLG    | Selectin P Ligand               | NM_001206609 | T | G  | nonsynonymous SNV | A758C        | E253A            | M9 | T | B | -5.23  |
| 7  | 57529086  | 57529086  | ZNF716    | Zinc Finger Protein 716         | NM_001159279 | C | A  | nonsynonymous SNV | C919A        | R307S            | M9 | T | B | -218   |
| 17 | 7483366   | 7483366   | CD68      | CD68 Molecule                   | NM_001251    | T | A  | nonsynonymous SNV | T288A        | N96K             | M9 | T | B | -5.96  |
| 11 | 618683    | 618683    | CDHR5     | Cadherin-Related Family Mem     | NM_021924    | T | A  | nonsynonymous SNV | A1876T       | T626S            | M9 | T | B | 592    |
| 7  | 100639761 | 100639761 | MUC12     | Mucin12                         | NM_001164462 | G | C  | nonsynonymous SNV | G5917C       | D1973H           | M9 | T |   | -275   |
| 7  | 44146353  | 44146353  | AEBP1     | AE binding protein 1            | NM_001129    | A | T  | nonsynonymous SNV | A462T        | K154N            | M9 | D | D | -0.51  |
| 1  | 94001896  | 94001896  | FBNP1L    | Formin Binding Protein 1-Like   | NM_001164473 | C | G  | nonsynonymous SNV | C998G        | S333C            | M9 | D | B | 5.16   |
| 15 | 22743461  | 22743461  | GOLGA6L1  | golgin A6 family-like 1         | NM_001001413 | T | A  | nonsynonymous SNV | T1846A       | W616R            | M9 | T |   |        |
| 15 | 22743461  | 22743461  | GOLGA6L22 | golgin A6 family-like 22        | NM_001271664 | T | A  | nonsynonymous SNV | T1810A       | W604R            | M9 | T |   |        |
| 11 | 48511193  | 48511193  | OR4A47    | olfactory receptor, family 4, s | NM_001005512 | A | T  | nonsynonymous SNV | A849T        | L283F            | M9 | T | B | -451   |
| 19 | 1440068   | 1440068   | RPS15     | ribosomal protein S15           | NM_001018    | G | C  | nonsynonymous SNV | G140C        | R47P             | M9 | T | B | 3.21   |

Supplementary Table S4

| Small InDels |           |           |             |                                                  |                 |             |                |                         |                                 |                     |        |
|--------------|-----------|-----------|-------------|--------------------------------------------------|-----------------|-------------|----------------|-------------------------|---------------------------------|---------------------|--------|
| Chr          | Start     | End       | Gene symbol | Gene description                                 | Accession       | Reference A | Variant Allele | Variant classification  | cDNA change                     | Protein change      | Sample |
| 20           | 126311    | 126312    | DEFB126     | Defensin, beta 126                               | NM_030931       | CC          | 0              | frameshift deletion     | 314_315del                      | T105fs              | M1     |
| 5            | 74021847  | 74021852  | GFM2        | G elongation factor, mitochondrial 2             | NM_032380       | ACTCAA      | 0              | nonframeshift deletion  | 1826_1831del                    | 609_611del          | M1     |
| 15           | 72455660  | 72455667  | GRAMD2      | GRAM domain containing 2                         | NM_001012642    | GCTCCCA     | 0              | nonframeshift deletion  | 896_913del                      | 299_305del          | M1     |
| 1            | 175129925 | 175129933 | KIAA0040    | KIAA0040                                         | NM_001162893    | CTTCTCTT    | 0              | nonframeshift deletion  | 217_225del                      | 73_75del            | M1     |
| 17           | 20370782  | 20370782  | LGALS9B     | Lectin, galactoside-binding, soluble, 9B         | NM_001042685    | 0           | TC             | frameshift insertion    | 1_2insGA                        | M1fs                | M1     |
| 1            | 26608820  | 26608843  | UBXN11      | UBX domain protein 11                            | NM_145345       | GGGACTGG    | 0              | nonframeshift deletion  | 1411_1434del                    | 471_478del          | M1     |
| 18           | 56204388  | 56204402  | ALPK2       | alpha-kinase 2                                   | NM_052947       | CAGTTGAT    | 0              | nonframeshift deletion  | 3017_3031del                    | 1006_1011del        | M1     |
| 8            | 11666219  | 11666224  | FDFT1       | Farnesyl-Diphosphate Farnesyltransferase         | NM_001287750    | TCCAC       | 0              | nonframeshift deletion  | 193_198del                      | 65_66del            | M1     |
| 12           | 53069223  | 53069243  | KRT1        | keratin 1                                        | NM_006121       | ACCTCCGG    | 0              | nonframeshift deletion  | 1669_1689del                    | 557_563del          | M1     |
| 11           | 95825375  | 95825383  | MAML2       | Mastermind-Like 2                                | NM_032427       | TGCTGCTG    | 0              | nonframeshift deletion  | 1812_1820del                    | 604_607del          | M1     |
| 1            | 209605637 | 209605648 | MIR205HG    | MIR205 host gene (non-protein coding)            | NM_001004702    | AGCAGCAG    | 0              | nonframeshift deletion  | 252_263del                      | 84_88del            | M1     |
| 11           | 48346661  | 48346669  | OR4C3       | olfactory receptor, family 4, subfamily C        | NM_001004702    | TTGCTGAT    | 0              | nonframeshift deletion  | 169_177del                      | 57_59del            | M1     |
| 20           | 238436    | 238441    | DEFB132     | defensin, beta 132                               | NM_207469       | DFGTCT      | 0              | nonframeshift deletion  | 17_22del                        | 6_8del              | M1     |
| 16           | 71956512  | 71956517  | IST1        | increased sodium tolerance 1 homolog             | NM_001270979    | ATGCCC      | 0              | nonframeshift deletion  | 244_249del                      | 82_83del            | M1     |
| 13           | 25671273  | 25671273  | PABPC3      | poly(A) binding protein, cytoplasmic 3           | NM_030979       | G           | 0              | frameshift deletion     | 937delG                         | A313fs              | M1     |
| 1            | 153233991 | 153233991 | LOR         | loricin                                          | NM_000427       | 0           | CTCTGGCGGCGG   | nonframeshift insertion | 566_567insCTCTGGCGGCGG          | Y189delinsYSGGG     | M1     |
| 2            | 120194651 | 120194651 | TMEM37      | transmembrane protein 37                         | NM_183460       | 0           | GTGTGC         | nonframeshift insertion | 208_209insGTGTGC                | T70delinsSVP        | M1     |
| X            | 2835999   | 2836007   | ARSD        | arylsulfatase D                                  | NM_001669       | CCACGCCG    | 0              | nonframeshift deletion  | 701_709del                      | 234_237del          | M1     |
| 13           | 25671311  | 25671315  | PABPC3      | poly(A) binding protein, cytoplasmic 3           | NM_030979       | TATGA       | 0              | frameshift deletion     | 975_979del                      | V325fs              | M1     |
| 7            | 131241029 | 131241029 | PODXL       | podocalyxin-like                                 | NM_001018111    | 0           | GGCGAC         | nonframeshift insertion | 89_90insGTCCGC                  | P30delinsPSP        | M1     |
| 3            | 46414944  | 46414975  | CCR5        | chemokine (C-C motif) receptor 5 (gene)          | NM_000579       | ACAGTCAG    | 0              | frameshift deletion     | 551_582del                      | Y184fs              | M1     |
| 17           | 39305775  | 39305775  | KRTAP4-5    | keratin associated protein 4-5                   | NM_033188       | 0           | GGCAGCAGCTGGG  | nonframeshift insertion | 244_245insGCCCGCAGCTGCTGCC      | Q82delinsRPSCCQ     | M1     |
| 11           | 7818383   | 7818383   | OR5P2       | olfactory receptor, family 5, subfamily P        | NM_153444       | 0           | ATATGGTTACAGGT | nonframeshift insertion | 106_107insGCATCTACCTGGTAACCATAT | S36delinsC1YLVITIS  | M1     |
| 5            | 141324955 | 141324955 | PCDH12      | protocadherin 12                                 | NM_016580       | 0           | CTGCTGCTG      | nonframeshift insertion | 3545_3546insCAGCAGCAG           | R1182delinsSSSR     | M1     |
| 17           | 17697094  | 17697096  | RAI1        | retinoic acid induced 1                          | NM_030665       | CAG         | 0              | nonframeshift deletion  | 832_834del                      | 278_278del          | M1     |
| 14           | 92537354  | 92537354  | ATXN3       | Ataxin 3                                         | NM_004993       | 0           | CTGCTGCTGCTGCT | nonframeshift insertion | 915_916insCAGCAGCAGCAGCAGCAGC   | G306delinsQQQQQQQQG | M11    |
| 18           | 24126808  | 24126808  | KCTD1       | Potassium channel tetramerization domain         | NM_001142730    | CD          | 0              | frameshift deletion     | 1693delG                        | A565fs              | M1     |
| 4            | 57180576  | 57180576  | KIAA1211    | KIAA1211                                         | NM_020722:exon8 | 0           | GGAGCGGAGGGAG  | nonframeshift insertion | 908_909insGGAGCGGAGGGAGCGGAG    | A303delinsAERRRR    | M11    |
| 9            | 12775861  | 12775861  | LURAP1L     | Leucine rich adaptor protein 1-like              | NM_203403       | 0           | GGCGCGGC       | nonframeshift insertion | 147_148insGGCGCGGC              | G49delinsGGGG       | M11    |
| 15           | 90320121  | 90320144  | MESP2       | Mesoderm posterior basic helix-loop-helix        | NM_001039958    | AGGGGCAG    | 0              | nonframeshift deletion  | 533_556del                      | 178_186del          | M11    |
| 1            | 209605637 | 209605648 | MIR205HG    | MIR205 host gene (non-protein coding)            | NM_001004702    | AGCAGCAG    | 0              | nonframeshift deletion  | 252_263del                      | 84_88del            | M11    |
| 20           | 238436    | 238441    | DEFB132     | defensin, beta 132                               | NM_207469       | DFGTCT      | 0              | nonframeshift deletion  | 17_22del                        | 6_8del              | M11    |
| 1            | 153233991 | 153233991 | LOR         | loricin                                          | NM_000427       | 0           | CTCTGGCGGCGG   | nonframeshift insertion | 566_567insCTCTGGCGGCGG          | Y189delinsYSGGG     | M11    |
| 19           | 55790886  | 55790886  | HSPBP1      | HSPA (heat shock 70kDa) binding protein          | NM_001297600    | 0           | GCCCGCGCC      | nonframeshift insertion | 228_229insGGCGGCGGC             | S77delinsGGGS       | M11    |
| 1            | 85039999  | 85040007  | CTBS        | chitinase, di-N-acetyl-                          | NM_004388       | GCAGCGCC    | 0              | nonframeshift deletion  | 92_100del                       | 31_34del            | M11    |
| 8            | 86126827  | 86126827  | C8orf59     | chromosome 8 open reading frame 59               | NM_001293320    | 0           | AACATT         | nonframeshift insertion | 147_148insAATGTT                | D50delinsNVD        | M11    |
| 11           | 6567895   | 6567895   | DNHD1       | dynein heavy chain domain 1                      | NM_144666       | 0           | TGCCCTACTGCA   | nonframeshift insertion | 5726_5727insTGCCCTACTGCA        | A1909delinsAALLH    | M11    |
| 7            | 131241030 | 131241035 | PODXL       | podocalyxin-like                                 | NM_001018111    | GGCGAC      | 0              | nonframeshift deletion  | 84_89del                        | 28_30del            | M11    |
| 5            | 141324955 | 141324955 | PCDH12      | protocadherin 12                                 | NM_016580       | 0           | CTGCTGCTG      | nonframeshift insertion | 3545_3546insCAGCAGCAG           | R1182delinsSSSR     | M11    |
| 8            | 8234868   | 8234868   | SGK223      | homolog of rat pragra of Rnd2                    | NM_001080826    | 0           | GCCGCT         | nonframeshift insertion | 1050_1051insAGCGGC              | A351delinsSGA       | M11    |
| 15           | 79058941  | 79058943  | ADAMTS7     | ADAM metalloproteinase with thrombospondin       | NM_014272       | CGC         | 0              | nonframeshift deletion  | 3310_3312del                    | 1104_1104del        | M14    |
| 9            | 100616701 | 100616706 | FOXE1       | Forkhead box E1                                  | NM_004473       | GCCGCC      | 0              | nonframeshift deletion  | 505_510del                      | 169_170del          | M14    |
| 7            | 5352665   | 5352665   | TNRC18      | Trinucleotide repeat containing 18               | NM_001080495    | 0           | GAGGAG         | nonframeshift insertion | 7856_7857insCTCCTC              | S2619delinsSSS      | M14    |
| 1            | 26608843  | 26608843  | UBXN11      | UBX domain protein 11                            | NM_145345       | 0           | GGGACA         | nonframeshift insertion | 1410_1411insTGTC                | :G471delinsCPG      | M14    |
| 16           | 28507398  | 28507424  | APOBR       | Apolipoprotein B receptor                        | NM_018690       | GGGACAGC    | 0              | nonframeshift deletion  | 1036_1062del                    | 346_354del          | M16    |
| 6            | 82461728  | 82461742  | FAM46A      | Family with sequence similarity 46, member       | NM_017633       | CCGCCGAA    | 0              | nonframeshift deletion  | 117_131del                      | 39_44del            | M16    |
| 11           | 1651586   | 1651615   | KRTAP5-5    | Keratin associated protein 5-5                   | NM_001001480    | CTGCTGCC    | 0              | nonframeshift deletion  | 516_545del                      | 172_182del          | M16    |
| 11           | 76895771  | 76895792  | MYO7A       | Myosin VIIA                                      | NM_001127179    | GAGGCGG     | 0              | frameshift deletion     | 3514_3535del                    | 11712fs             | M16    |
| 16           | 855518    | 855523    | PRR25       | Proline rich 25                                  | NM_001013638    | GCAGCT      | 0              | nonframeshift deletion  | 76_81del                        | 26_27del            | M16    |
| 8            | 87226635  | 87226642  | SLC7A13     | Solute carrier family 7 (anionic amino acid)     | NM_138817       | CCGACATC    | 0              | frameshift deletion     | 1413_1511del                    | *471fs              | M16    |
| 2            | 231861033 | 231861059 | SPATA3      | Spermatogenesis associated 3                     | NM_139073       | CAGCAGCC    | 0              | nonframeshift deletion  | 85_111del                       | 29_37del            | M16    |
| 18           | 56204388  | 56204402  | ALPK2       | alpha-kinase 2                                   | NM_052947       | CAGTTGAT    | 0              | nonframeshift deletion  | 3017_3031del                    | 1006_1011del        | M16    |
| 8            | 11666219  | 11666224  | FDFT1       | Farnesyl-Diphosphate Farnesyltransferase         | NM_001287750    | TCCAC       | 0              | nonframeshift deletion  | 193_198del                      | 65_66del            | M16    |
| 10           | 46999591  | 46999591  | GPRIN2      | G protein regulated inducer of neurite outgrowth | NM_014696       | 0           | ATGAGGGAG      | nonframeshift insertion | 711_712insATGAGGGAG             | G237delinsGMRE      | M16    |
| 12           | 53069223  | 53069243  | KRT1        | keratin 1                                        | NM_006121       | ACCTCCGG    | 0              | nonframeshift deletion  | 1669_1689del                    | 557_563del          | M16    |
| 11           | 95825375  | 95825383  | MAML2       | Mastermind-Like 2                                | NM_032427       | TGCTGCTG    | 0              | nonframeshift deletion  | 1812_1820del                    | 604_607del          | M16    |
| 11           | 48346661  | 48346669  | OR4C3       | olfactory receptor, family 4, subfamily C        | NM_001004702    | TTGCTGAT    | 0              | nonframeshift deletion  | 169_177del                      | 57_59del            | M16    |
| 20           | 238436    | 238441    | DEFB132     | defensin, beta 132                               | NM_207469       | DFGTCT      | 0              | nonframeshift deletion  | 17_22del                        | 6_8del              | M16    |
| 1            | 153907279 | 153907287 | DENN4B      | DENN/MADD Domain Containing 4B                   | NM_014856       | CTGCTGCT    | 0              | nonframeshift deletion  | 2722_2730del                    | 908_910del          | M16    |
| 16           | 71956512  | 71956517  | IST1        | increased sodium tolerance 1 homolog             | NM_001270979    | ATGCCC      | 0              | nonframeshift deletion  | 244_249del                      | 82_83del            | M16    |
| 13           | 25671273  | 25671273  | PABPC3      | poly(A) binding protein, cytoplasmic 3           | NM_030979       | G           | 0              | frameshift deletion     | 937delG                         | A313fs              | M16    |
| 3            | 197880131 | 197880139 | FAM157A     | family with sequence similarity 157, member      | NM_001145248    | GCAGCAGC    | 0              | nonframeshift deletion  | 210_218del                      | 70_73del            | M16    |
| 1            | 153233991 | 153233991 | LOR         | loricin                                          | NM_000427       | 0           | CTCTGGCGGCGG   | nonframeshift insertion | 566_567insCTCTGGCGGCGG          | Y189delinsYSGGG     | M16    |

|    |           |           |           |                                            |              |   |                |                         |                            |                  |     |
|----|-----------|-----------|-----------|--------------------------------------------|--------------|---|----------------|-------------------------|----------------------------|------------------|-----|
| 2  | 120194651 | 120194651 | TMEM37    | transmembrane protein 37                   | NM_183240    | 0 | GTGTGC         | nonframeshift insertion | 208_209insGTGTGC           | T70delinsSVP     | M16 |
| 5  | 176026120 | 176026143 | GPRIN1    | G protein regulated inducer of neurite o   | NM_052899    | 0 | CTCAAAGA       | nonframeshift deletion  | 693_716del                 | 231_239del       | M16 |
| 7  | 100612955 | 100612955 | MUC12     | Mucin12                                    | NM_001164462 | 0 | CTG            | nonframeshift insertion | 52_53insCTG                | T18delinsTA      | M16 |
| 13 | 25671311  | 25671315  | PABPC3    | poly(A) binding protein, cytoplasmic 3     | NM_030979    | 0 | TATGA          | frameshift deletion     | 975_979del                 | V325fs           | M16 |
| 13 | 25670801  | 25670801  | PABPC3    | poly(A) binding protein, cytoplasmic 3     | NM_030979    | 0 | G              | frameshift insertion    | 465_466insG                | I155fs           | M16 |
| 13 | 25671146  | 25671157  | PABPC3    | poly(A) binding protein, cytoplasmic 3     | NM_030979    | 0 | GAAACGGC       | nonframeshift deletion  | 810_821del                 | 270_274del       | M16 |
| 3  | 52027853  | 52027853  | RPL29     | ribosomal protein L29                      | NM_000992    | 0 | CCTTGG         | nonframeshift insertion | 391_392insCCAAGG           | D131delinsAKD    | M16 |
| 8  | 8234868   | 8234868   | SGK223    | homolog of rat pragma of Rnd2              | NM_001080826 | 0 | GCCGCT         | nonframeshift insertion | 1050_1051insAGCGGC         | A351delinsSGA    | M16 |
| 21 | 34003928  | 34003928  | SYNJ1     | synaptojanin 1                             | NM_003895    | 0 | AGTATT         | nonframeshift insertion | 4215_4216insAATACT         | L1406delinsNTL   | M16 |
| 14 | 23548783  | 23548783  | ACIN1     | apoptotic chromatin condensation induc     | NM_014977    | 0 | GAACGT         | nonframeshift insertion | 1934_1935insACGTTT         | S645delinsSRS    | M17 |
| 14 | 74060511  | 74060511  | ACOT4     | acyl-CoA thioesterase 4                    | NM_152331    | 0 | TCAA           | frameshift insertion    | 563_564insTCAA             | L188fs           | M17 |
| 14 | 74060514  | 74060517  | ACOT4     | acyl-CoA thioesterase 4                    | NM_152331    | 0 | CTTA           | frameshift deletion     | 566_569del                 | A189fs           | M17 |
| 2  | 73613032  | 73613037  | ALMS1     | Alstrom syndrome 1                         | NM_015120    | 0 | GGAGGA         | nonframeshift deletion  | 36_41del                   | 12_14del         | M17 |
| 14 | 105055119 | 105055127 | C14orf180 | chromosome 14 open reading frame 18        | NM_001008404 | 0 | GACGGGCA       | frameshift deletion     | 482_819del                 | *161fs           | M17 |
| 16 | 85743839  | 85743858  | C16orf74  | Chromosome 16 open reading frame 74        | NM_206967    | 0 | CGTCCAGG       | frameshift deletion     | 84_103del                  | L28fs            | M17 |
| 6  | 90577707  | 90577721  | CASP8AP2  | caspase 8 associated protein 2             | NM_001137667 | 0 | GACATCTT       | nonframeshift deletion  | 4698_4712del               | 1566_1571del     | M17 |
| 6  | 90577726  | 90577728  | CASP8AP2  | caspase 8 associated protein 2             | NM_001137667 | 0 | GGA            | nonframeshift deletion  | 4717_4719del               | 1573_1573del     | M17 |
| 22 | 50315936  | 50315973  | CRELD2    | Cysteine-rich with EGF-like domains 2      | NM_002430    | 0 | CCTCAGCA       | frameshift deletion     | 1632_1637del               | 544_546del       | M17 |
| 1  | 225707034 | 225707051 | ENAH      | enabled homolog (Drosophila)               | NM_001008493 | 0 | TCCAGGCG       | nonframeshift deletion  | 651_668del                 | 217_223del       | M17 |
| 17 | 77710954  | 77710954  | ENPP7     | Ectonucleotide pyrophosphatase/phosp       | NM_178543    | 0 | C              | frameshift deletion     | 1141delC                   | P381fs           | M17 |
| 4  | 3076604   | 3076621   | HTT       | Huntingtin                                 | NM_002211    | 0 | CAGCAGCA       | nonframeshift deletion  | 52_69del                   | 18_23del         | M17 |
| 15 | 100252710 | 100252715 | MEF2A     | myocyte enhancer factor 2A                 | NM_005587    | 0 | CAGCAG         | nonframeshift deletion  | 1234_1239del               | 412_413del       | M17 |
| 22 | 28194895  | 28194900  | MN1       | Meningioma (disrupted in balanced tran     | NM_002430    | 0 | TGCTGT         | nonframeshift deletion  | 1632_1637del               | 544_546del       | M17 |
| 6  | 45390487  | 45390504  | RUNX2     | runt-related transcription factor 2        | NM_001024630 | 0 | GCCGGCG        | nonframeshift deletion  | 216_233del                 | 72_78del         | M17 |
| 10 | 21805466  | 21805466  | SKIDA1    | SKI/DACH domain containing 1               | NM_207371    | 0 | GCTCCT         | nonframeshift insertion | 1285_1286insAGGAGG         | G429delinsEEG    | M17 |
| 19 | 48305639  | 48305650  | TPRX1     | Tetra-peptide repeat homeobox 1            | NM_198479    | 0 | GGGCTGCT       | nonframeshift deletion  | 618_629del                 | 206_210del       | M17 |
| 9  | 124855330 | 124855330 | TLL11     | Tubulin tyrosine ligase-like family mem    | NM_00113944  | 0 | TGGCCT         | nonframeshift insertion | 367_368insAGGCCA           | T123delinsKAT    | M17 |
| 17 | 46882287  | 46882303  | TLL6      | Tubulin tyrosine ligase-like family mem    | NM_001130918 | 0 | CTTTCCAA       | frameshift deletion     | 154_170del:p               | C52fs            | M17 |
| 7  | 30325341  | 30325341  | ZNRF2     | Zinc and ring finger 2, E3 ubiquitin prote | NM_147128    | 0 | CGG            | nonframeshift insertion | 368_369insCGG              | D123delinsDG     | M17 |
| 18 | 56204388  | 56204402  | ALPK2     | alpha-kinase 2                             | NM_052947    | 0 | CAGTTGAT       | nonframeshift deletion  | 3017_3031del               | 1006_1011del     | M17 |
| 10 | 46999591  | 46999591  | GPRIN2    | G protein regulated inducer of neurite o   | NM_014696    | 0 | ATGAGGGAG      | nonframeshift insertion | 711_712insATGAGGGAG        | G237delinsGMRE   | M17 |
| 12 | 53069223  | 53069243  | KRT1      | keratin 1                                  | NM_006121    | 0 | ACCTCCGG       | nonframeshift deletion  | 1669_1689del               | 557_563del       | M17 |
| 1  | 209605637 | 209605648 | MIR205HG  | MIR205 host gene (non-protein coding)      | NM_001004702 | 0 | AGCAGCAG       | nonframeshift deletion  | 252_263del                 | 84_88del         | M17 |
| 11 | 48346661  | 48346669  | OR4C3     | olfactory receptor, family 4, subfamily C  | NM_001004702 | 0 | TTGCTGAT       | nonframeshift deletion  | 169_177del                 | 57_59del         | M17 |
| 5  | 140574170 | 140574175 | PCDHB10   | protocadherin beta 10                      | NM_018930    | 0 | AGGCCG         | nonframeshift deletion  | 2045_2050del               | 682_684del       | M17 |
| 20 | 238436    | 238441    | DEFB132   | defensin, beta 132                         | NM_207469    | 0 | TGGTCT         | nonframeshift deletion  | 17_22del                   | 6_8del           | M17 |
| 3  | 197880131 | 197880139 | FAM157A   | family with sequence similarity 157, me    | NM_001145248 | 0 | GCAGCAGC       | nonframeshift deletion  | 210_218del                 | 70_73del         | M17 |
| 5  | 176026120 | 176026143 | GPRIN1    | G protein regulated inducer of neurite o   | NM_052899    | 0 | CTCAAAGA       | nonframeshift deletion  | 693_716del                 | 231_239del       | M17 |
| 7  | 100612955 | 100612955 | MUC12     | Mucin12                                    | NM_001164462 | 0 | CTG            | nonframeshift insertion | 52_53insCTG                | T18delinsTA      | M17 |
| 12 | 122359397 | 122359397 | WDR66     | WD Repeat Domain 66                        | NM_144668    | 0 | GAGGAGGAGGAGAA | nonframeshift insertion | 186_187insGAGGAGGAGGAGAAA  | G62delinsGEEEEK  | M17 |
| 8  | 65494007  | 65494007  | BHLHE22   | basic helix-loop-helix family, member e    | NM_152414    | 0 | AGCGGC         | nonframeshift insertion | 660_661insAGCGGC           | G220delinsGSG    | M17 |
| 3  | 46414944  | 46414975  | CCR5      | chemokine (C-C motif) receptor 5 (gene)    | NM_000579    | 0 | ACAGTCAG       | frameshift deletion     | 551_582del                 | Y184fs           | M17 |
| 9  | 12775861  | 12775861  | LURAP1L   | leucine rich adaptor protein 1-like        | NM_203403    | 0 | GGTGGC         | nonframeshift insertion | 147_148insGGCGCGCGC        | G49delinsGGGG    | M17 |
| 7  | 131241030 | 131241035 | PODXL     | podocalyxin-like                           | NM_001018111 | 0 | GGCGAC         | nonframeshift deletion  | 84_89del                   | 28_30del         | M17 |
| 3  | 52027853  | 52027853  | RPL29     | ribosomal protein L29                      | NM_000992    | 0 | CCTTGG         | nonframeshift insertion | 391_392insCCAAGG           | D131delinsAKD    | M17 |
| 12 | 118506328 | 118506333 | VSIG10    | V-set and immunoglobulin domain cont       | NM_019086    | 0 | TCCTCC         | nonframeshift deletion  | 1416_1421del               | 472_474del       | M17 |
| 22 | 50921149  | 50921166  | ADM2      | adrenomedullin 2                           | NM_001253845 | 0 | CACTCGG        | nonframeshift deletion  | 264_281del                 | 88_94del         | M2  |
| 11 | 129991653 | 129991658 | APLP2     | Amyloid beta (A4) precursor-like protei    | NM_001642    | 0 | GAAGAG         | nonframeshift deletion  | 661_666del                 | 221_222del       | M2  |
| 19 | 13054656  | 13054658  | CALR      | Calreticulin                               | NM_004343    | 0 | GAG            | nonframeshift deletion  | 1183_1185del               | 395_395del       | M2  |
| 17 | 72889649  | 72889649  | FADS6     | Fatty acid desaturase 6                    | NM_178128    | 0 | GGTTCATGGGCTC  | nonframeshift insertion | 44_45insTACGGAGCCCATGGAACC | P15delinsPTEPMEP | M2  |
| 2  | 187559029 | 187559029 | FAM171B   | Family with sequence similarity 171, me    | NM_177454    | 0 | CAGCAG         | nonframeshift insertion | 129_130insCAGCAG           | Q43delinsQQQ     | M2  |
| 17 | 39383323  | 39383334  | KRTAP9-2  | Keratin Associated Protein 9-2             | NM_031961    | 0 | CTGCTGCC       | nonframeshift deletion  | 417_428del                 | 139_143del       | M2  |
| 11 | 47640434  | 47640434  | MTCH2     | Mitochondrial carrier 2                    | NM_014342    | 0 | TGTC           | frameshift insertion    | 862_863insGACA             | K288fs           | M2  |
| 1  | 111957502 | 111957525 | OVGP1     | Oviductal glycoprotein 1                   | NM_002557    | 0 | TCACAGAC       | nonframeshift deletion  | 1598_1621del               | 533_541del       | M2  |
| 17 | 17697094  | 17697105  | RAI1      | retinoic acid induced 1                    | NM_030665    | 0 | CAGCAGCA       | nonframeshift deletion  | 832_843del                 | 278_281del       | M2  |
| 21 | 34948684  | 34948684  | SON       | SON DNA binding protein                    | NM_138927    | 0 | A              | frameshift insertion    | 7236dupA                   | G2412fs          | M2  |
| 4  | 177106010 | 177106013 | SPATA4    | Spermatogenesis associated 4               | NM_144644    | 0 | TCTC           | frameshift deletion     | 836_839del                 | R279fs           | M2  |
| 14 | 58863049  | 58863054  | TOMM20L   | Translocase of outer mitochondrial mem     | NM_207377    | 0 | AGGGCA         | nonframeshift deletion  | 170_175del                 | 57_59del         | M2  |
| 1  | 26608812  | 26608835  | UBXN11    | UBX domain protein 11                      | NM_145345    | 0 | CCAGGACA       | nonframeshift deletion  | 1419_1442del               | 473_481del       | M2  |
| 15 | 85186877  | 85186894  | WDR73     | WD repeat domain 73                        | NM_032856    | 0 | CTTGCTC        | nonframeshift deletion  | 944_961del                 | 315_321del       | M2  |
| 18 | 56204388  | 56204402  | ALPK2     | alpha-kinase 2                             | NM_052947    | 0 | CAGTTGAT       | nonframeshift deletion  | 3017_3031del               | 1006_1011del     | M2  |
| 8  | 11666219  | 11666224  | FDFT1     | Farnesyl-Diphosphate Farnesyltransfer      | NM_001287750 | 0 | TCCAC          | nonframeshift deletion  | 193_198del                 | 65_66del         | M2  |
| 10 | 46999591  | 46999591  | GPRIN2    | G protein regulated inducer of neurite o   | NM_014696    | 0 | ATGAGGGAG      | nonframeshift insertion | 711_712insATGAGGGAG        | G237delinsGMRE   | M2  |
| 12 | 53069223  | 53069243  | KRT1      | keratin 1                                  | NM_006121    | 0 | ACCTCCGG       | nonframeshift deletion  | 1669_1689del               | 557_563del       | M2  |
| 11 | 95825375  | 95825383  | MAML2     | Mastermind-Like 2                          | NM_032427    | 0 | TGCTGCTG       | nonframeshift deletion  | 1812_1820del               | 604_607del       | M2  |
| 11 | 48346661  | 48346669  | OR4C3     | olfactory receptor, family 4, subfamily C  | NM_001004702 | 0 | TTGCTGAT       | nonframeshift deletion  | 169_177del                 | 57_59del         | M2  |
| 5  | 140574170 | 140574175 | PCDHB10   | protocadherin beta 10                      | NM_018930    | 0 | AGGCCG         | nonframeshift deletion  | 2045_2050del               | 682_684del       | M2  |

|    |           |           |          |                                                            |              |           |                |                         |                          |                 |    |
|----|-----------|-----------|----------|------------------------------------------------------------|--------------|-----------|----------------|-------------------------|--------------------------|-----------------|----|
| 1  | 153907279 | 153907287 | DENND4B  | DENN/MADD Domain Containing 4B                             | NM_014856    | CTGCTGCT  | 0              | nonframeshift deletion  | 2722_2730del             | 908_910del      | M2 |
| 16 | 71956512  | 71956517  | IST1     | increased sodium tolerance 1 homolog                       | NM_001270979 | ATGCCC    | 0              | nonframeshift deletion  | 244_249del               | 82_83del        | M2 |
| 3  | 197880131 | 197880139 | FAM157A  | family with sequence similarity 157, member 1              | NM_001145248 | GCAGCAGC  | 0              | nonframeshift deletion  | 210_218del               | 70_73del        | M2 |
| 3  | 10088407  | 10088410  | FANCD2   | Fanconi anemia, complementation group 2                    | NM_033084    | AGTA      | 0              | frameshift deletion     | 1278_1278del             | L426fs          | M2 |
| 5  | 176026120 | 176026143 | GPRIN1   | G protein regulated inducer of neurite outgrowth 1         | NM_052899    | CTCAAAGA  | 0              | nonframeshift deletion  | 693_716del               | 231_239del      | M2 |
| 7  | 100612955 | 100612955 | MUC12    | Mucin12                                                    | NM_001166462 | 0         | CTG            | nonframeshift insertion | 52_53insCTG              | T18delinsTA     | M2 |
| 12 | 122359397 | 122359397 | WDR66    | WD Repeat Domain 66                                        | NM_144668    | 0         | GAGGAGGAGGAGAA | nonframeshift insertion | 186_187insGAGGAGGAGAGAAA | G62delinsGEEEEK | M2 |
| 1  | 85039999  | 85040007  | CTBS     | chitobiose, di-N-acetyl-                                   | NM_004388    | GCAGCGCC  | 0              | nonframeshift deletion  | 92_100del                | S1_34del        | M2 |
| 8  | 86126827  | 86126827  | C8orf59  | chromosome 8 open reading frame 59                         | NM_001293320 | 0         | AACATT         | nonframeshift insertion | 147_148insAATGTT         | D50delinsNVD    | M2 |
| 8  | 103573011 | 103573037 | ODF1     | outer dense fiber of sperm tails 1                         | NM_024410    | TGCAACCC  | 0              | nonframeshift deletion  | 652_678del               | 218_226del      | M2 |
| 2  | 113300002 | 113300026 | POLR1B   | polymerase (RNA) I polypeptide B, 128 kDa                  | NM_001282772 | TCCGGCGT  | 0              | frameshift deletion     | 45_69del                 | L15fs           | M2 |
| 12 | 118506328 | 118506333 | VSIG10   | V-set and immunoglobulin domain containing 10              | NM_019086    | TCCTCC    | 0              | nonframeshift deletion  | 1416_1421del             | 472_474del      | M2 |
| 19 | 47883158  | 47883163  | DHX34    | DEAH (Asp-Glu-Ala-His) box polypeptide family 34           | NM_014681    | GGAGGA    | 0              | nonframeshift deletion  | 2898_2903del             | 966_968del      | M4 |
| 2  | 71801334  | 71801334  | DYSF     | Dysferlin                                                  | NM_001130977 | 0         | AGCGCG         | nonframeshift insertion | 3139_3140insAGCGCG       | Q1047delinsQAE  | M4 |
| 15 | 40268998  | 40268998  | EIF2AK4  | Eukaryotic translation initiation factor 2, class I        | NM_001013703 | 0         | GACGAC         | nonframeshift insertion | 2202_2203insGACGAC       | E734delinsEDD   | M4 |
| 13 | 46170720  | 46170737  | ERICH6B  | Glutamate-rich 6B                                          | NM_182542    | CCAGATAC  | 0              | nonframeshift deletion  | 404_421del               | 135_141del      | M4 |
| 7  | 150864247 | 150864261 | GBX1     | Gastrulation brain homeobox 1                              | NM_001098834 | GCGCGCGG  | 0              | nonframeshift deletion  | 375_389del               | 125_130del      | M4 |
| 1  | 9304979   | 9304986   | H6PD     | Hexose-6-phosphate dehydrogenase (cytosolic)               | NM_001282587 | CCCAGGCA  | 0              | nonframeshift deletion  | 24_26del                 | 8_9del          | M4 |
| 15 | 28518115  | 28518115  | HERC2    | HECT and RLD domain containing E3 ubiquitin ligase 2       | NM_004667    | C         | 0              | frameshift deletion     | 836delG                  | G279fs          | M4 |
| 17 | 46608184  | 46608184  | HOBX1    | Homeobox B1                                                | NM_002144    | 0         | GGCGCTGT       | nonframeshift insertion | 82_83insACAGCGCCC        | P28delinsHSAP   | M4 |
| X  | 78216054  | 78216054  | P2RY10   | purinergic receptor P2Y, G-protein coupled receptor 10     | NM_014499    | A         | 0              | frameshift deletion     | 37delA                   | M13fs           | M4 |
| 6  | 160560898 | 160560905 | SLC22A1  | Solute carrier family 22, member 1                         | NM_003057    | TGGTAAGT  | 0              | frameshift deletion     | 1275_1276del             | P425fs          | M4 |
| X  | 118603706 | 118603706 | SLC25A5  | Solute carrier family 25 (mitochondrial carrier), member 5 | NM_001152    | 0         | G              | frameshift insertion    | 195dupG                  | Q65fs           | M4 |
| 17 | 76798549  | 76798554  | USP36    | Ubiquitin specific peptidase 36                            | NM_025090    | TTTTTC    | 0              | nonframeshift deletion  | 2874_2879del             | 958_960del      | M4 |
| 18 | 56204388  | 56204402  | ALPK2    | alpha-kinase 2                                             | NM_052947    | CAGTTGAT  | 0              | nonframeshift deletion  | 3017_3031del             | 1006_1011del    | M4 |
| 1  | 209605637 | 209605648 | MIR205HG | MIR205 host gene (non-protein coding)                      | NM_001152    | AGCAGCAC  | 0              | nonframeshift deletion  | 252_263del               | 84_88del        | M4 |
| 5  | 140574170 | 140574175 | PCDHB10  | protocadherin beta 10                                      | NM_018930    | AGGCGG    | 0              | nonframeshift deletion  | 2045_2050del             | 682_684del      | M4 |
| 16 | 71956512  | 71956517  | IST1     | increased sodium tolerance 1 homolog                       | NM_001270979 | ATGCCC    | 0              | nonframeshift deletion  | 244_249del               | 82_83del        | M4 |
| 13 | 25671273  | 25671273  | PABPC3   | poly(A) binding protein, cytoplasmic 3                     | NM_030979    | G         | 0              | frameshift deletion     | 937delG                  | A313fs          | M4 |
| 1  | 153233991 | 153233991 | LOR      | loricrin                                                   | NM_000427    | 0         | CTCTGGCGGCGG   | nonframeshift insertion | 566_567insCTCTGGCGGCGG   | Y189delinsYSGGG | M4 |
| 2  | 120194651 | 120194651 | TMEM37   | transmembrane protein 37                                   | NM_183240    | 0         | GTGTGC         | nonframeshift insertion | 208_209insGTGTGC         | T70delinsSVP    | M4 |
| X  | 2835999   | 2836007   | ARSD     | arylsulfatase D                                            | NM_001669    | CCACGCCG  | 0              | nonframeshift deletion  | 701_709del               | 234_237del      | M4 |
| 3  | 10088407  | 10088410  | FANCD2   | Fanconi anemia, complementation group 2                    | NM_033084    | AGTA      | 0              | frameshift deletion     | 1278_1278del             | L426fs          | M4 |
| 19 | 55790886  | 55790886  | HSPBP1   | HSPA (heat shock 70kDa) binding protein 1                  | NM_001297600 | 0         | GCCGCCGCC      | nonframeshift insertion | 228_229insGGCGGCGGC      | S77delinsGGGS   | M4 |
| 13 | 25671311  | 25671315  | PABPC3   | poly(A) binding protein, cytoplasmic 3                     | NM_030979    | TATGA     | 0              | frameshift deletion     | 975_979del               | V325fs          | M4 |
| 7  | 131241029 | 131241029 | PODXL    | podocalyxin-like 1                                         | NM_001018111 | 0         | GGCGAC         | nonframeshift insertion | 89_90insGTTCGCC          | P30delinsPSP    | M4 |
| 8  | 103573011 | 103573037 | ODF1     | outer dense fiber of sperm tails 1                         | NM_024410    | TGCAACCC  | 0              | nonframeshift deletion  | 652_678del               | 218_226del      | M4 |
| 13 | 25670801  | 25670801  | PABPC3   | poly(A) binding protein, cytoplasmic 3                     | NM_030979    | 0         | G              | frameshift insertion    | 465_466insG              | I155fs          | M4 |
| 13 | 25671146  | 25671157  | PABPC3   | poly(A) binding protein, cytoplasmic 3                     | NM_030979    | GGAACGGC  | 0              | nonframeshift deletion  | 810_821del               | 270_274del      | M4 |
| 17 | 17697094  | 17697094  | RAI1     | retinoic acid induced 1                                    | NM_030665    | CAG       | 0              | nonframeshift deletion  | 832_834del               | 278_278del      | M4 |
| 19 | 17397498  | 17397501  | ANKLE1   | nkyrin repeat and LEM domain containing 1                  | NM_001278444 | TGTT      | 0              | frameshift deletion     | 1930_1933del             | C644fs          | M6 |
| 4  | 88536863  | 88536880  | DSPP     | Dentin sialophosphoprotein                                 | NM_014208    | AATAGTAGT | 0              | nonframeshift deletion  | 3049_3066del             | 1017_1022del    | M6 |
| 22 | 38482353  | 38482394  | BAIAP2L2 | BAI1-associated protein 2-like 2                           | NM_025045    | TGCGGGAGC | 0              | nonframeshift deletion  | 1322_1363del             | 441_455del      | M8 |
| 9  | 70900911  | 70900911  | CBWD3    | COBW domain containing 3                                   | NM_201453    | 0         | A              | frameshift insertion    | 772dupA                  | Q257fs          | M8 |
| 17 | 77807917  | 77807917  | CBX4     | chromobox homolog 4                                        | NM_003655    | 0         | GCCGCC         | nonframeshift insertion | 1523_1524insGGCGGC       | A508delinsAAA   | M8 |
| 1  | 240370914 | 240370946 | FMN2     | Formin 2                                                   | NM_020066    | GCCCCCTC  | 0              | nonframeshift deletion  | 2802_2834del             | 934_945del      | M8 |
| 6  | 42179532  | 42179543  | MRPS10   | Mitochondrial ribosomal protein S10                        | NM_018141    | TACCAAGT  | 0              | nonframeshift deletion  | 299_310del               | 100_104del      | M8 |
| 1  | 248722428 | 248722428 | OR2T29   | Olfactory receptor, family 2, subfamily 29, member 29      | NM_001004694 | 0         | CG             | frameshift insertion    | 364_365insCG             | M122fs          | M8 |
| 11 | 608503    | 608514    | PHRF1    | PHD and ring finger domains 1                              | NM_001286581 | GGAGCGCG  | 0              | nonframeshift deletion  | 3047_3058del             | 1016_1020del    | M8 |
| 19 | 11558341  | 11558346  | PRKCSH   | Protein kinase C substrate 80K-H                           | NM_001001329 | GAGGAG    | 0              | nonframeshift deletion  | 937_942del               | 313_314del      | M8 |
| 9  | 79318376  | 79318390  | PRUNE2   | Prune homolog 2 (Drosophila)                               | NM_015225    | GTGACAGC  | 0              | nonframeshift deletion  | 8139_8153del             | 2713_2718del    | M8 |
| X  | 118603962 | 118603962 | SLC25A5  | Solute carrier family 25 (mitochondrial carrier), member 5 | NM_001152    | T         | 0              | frameshift deletion     | 450delT                  | A150fs          | M8 |
| 19 | 7585338   | 7585364   | ZNF358   | Zinc finger protein 358                                    | NM_018083    | GCAGCTGC  | 0              | nonframeshift deletion  | 1210_1236del             | 404_412del      | M8 |
| 8  | 11666219  | 11666224  | FDF1T    | Farnesyl-Diphosphate Farnesyltransferase 1                 | NM_001287750 | TCCAC     | 0              | nonframeshift deletion  | 193_198del               | 65_66del        | M8 |
| 10 | 46999591  | 46999591  | GPRIN2   | G protein regulated inducer of neurite outgrowth 2         | NM_014696    | 0         | ATGAGGGAG      | nonframeshift insertion | 711_712insATGAGGGAG      | G237delinsGMRE  | M8 |
| 12 | 53069223  | 53069243  | KRT1     | keratin 1                                                  | NM_006121    | ACCTCCGG  | 0              | nonframeshift deletion  | 1669_1689del             | 557_563del      | M8 |
| 11 | 95825375  | 95825383  | MAML2    | Mastermind-Like 2                                          | NM_032427    | TGCTGCTG  | 0              | nonframeshift deletion  | 1812_1820del             | 604_607del      | M8 |
| 11 | 48346661  | 48346669  | OR4C3    | olfactory receptor, family 4, subfamily C, member 3        | NM_001004702 | TTGCTGAT  | 0              | nonframeshift deletion  | 169_177del               | 57_59del        | M8 |
| 5  | 140574170 | 140574175 | PCDHB10  | protocadherin beta 10                                      | NM_018930    | AGGCGG    | 0              | nonframeshift deletion  | 2045_2050del             | 682_684del      | M8 |
| 1  | 153907279 | 153907287 | DENND4B  | DENN/MADD Domain Containing 4B                             | NM_014856    | CTGCTGCT  | 0              | nonframeshift deletion  | 2722_2730del             | 908_910del      | M8 |
| 13 | 25671273  | 25671273  | PABPC3   | poly(A) binding protein, cytoplasmic 3                     | NM_030979    | G         | 0              | frameshift deletion     | 937delG                  | A313fs          | M8 |
| 3  | 197880131 | 197880139 | FAM157A  | family with sequence similarity 157, member 1              | NM_001145248 | GCAGCAGC  | 0              | nonframeshift deletion  | 210_218del               | 70_73del        | M8 |
| 2  | 120194651 | 120194651 | TMEM37   | transmembrane protein 37                                   | NM_183240    | 0         | GTGTGC         | nonframeshift insertion | 208_209insGTGTGC         | T70delinsSVP    | M8 |
| X  | 2835999   | 2836007   | ARSD     | arylsulfatase D                                            | NM_001669    | CCACGCCG  | 0              | nonframeshift deletion  | 701_709del               | 234_237del      | M8 |
| 12 | 122359397 | 122359397 | WDR66    | WD Repeat Domain 66                                        | NM_144668    | 0         | GAGGAGGAGGAGAA | nonframeshift insertion | 186_187insGAGGAGGAGAGAAA | G62delinsGEEEEK | M8 |
| 8  | 65494007  | 65494007  | BHLHE22  | basic helix-loop-helix family, member 22                   | NM_152414    | 0         | AGCGGC         | nonframeshift insertion | 660_661insAGCGGC         | G220delinsGSG   | M8 |
| 2  | 233712210 | 233712230 | GIGYF2   | GRB10 interacting GYF protein 2                            | NM_001103147 | CAGCAGCA  | 0              | nonframeshift deletion  | 3676_3696del             | 1226_1302del    | M8 |



|    |           |           |          |                                           |              |   |                 |                         |                                 |                    |    |
|----|-----------|-----------|----------|-------------------------------------------|--------------|---|-----------------|-------------------------|---------------------------------|--------------------|----|
| 17 | 39305775  | 39305775  | KRTAP4-5 | keratin associated protein 4-5            | M_033188     | 0 | GGCAGCAGCTGGGC  | nonframeshift insertion | 244_245insGCCCCAGCTGCTGCC       | Q82delinsRPSCCQ    | M8 |
| 9  | 12775861  | 12775861  | LURAP1L  | leucine rich adaptor protein 1-like       | NM_203403    | 0 | GGTGGC          | nonframeshift insertion | 147_148insGGCGGCGGC             | G49delinsGGGG      | M8 |
| 18 | 72223591  | 72223591  | CNDP1    | Carnosine dipeptidase 1                   | NM_032649    | 0 | TGCTGC          | nonframeshift insertion | 43_44insTGCTGC                  | V15delinsVLL       | M9 |
| 13 | 72440538  | 72440538  | DACH1    | dachshund family transcription factor 1   | NM_080759    | 0 | GCCGCC          | nonframeshift insertion | 369_370insGGCGGC                | I124delinsGGI      | M9 |
| 7  | 96635364  | 96635369  | DLX6     | Distal-less homeobox 6                    | NM_005222    | 0 | GCAGCA          | nonframeshift deletion  | 75_80del                        | 25_27del           | M9 |
| 10 | 100992131 | 100992131 | HPSE2    | heparanase 2                              | NM_021828    | 0 | CCGGGC          | nonframeshift insertion | 421_422insGCCCGG                | D141delinsGPD      | M9 |
| 17 | 38975308  | 38975319  | KRT10    | Keratin 10, type I                        | NM_000421    | 0 | GCCGCGCT0       | nonframeshift deletion  | 1468_1479del                    | 490_493del         | M9 |
| 1  | 52499071  | 52499097  | KTI12    | KTI12 homolog, chromatin associated (     | NM_138417    | 0 | GCCCGCCA0       | nonframeshift deletion  | 337_363del                      | 113_121del         | M9 |
| 7  | 20824941  | 20824943  | SP8      | Sp8 transcription factor                  | NM_182700    | 0 | GCC             | nonframeshift deletion  | 493_495del                      | 165_165del         | M9 |
| 22 | 26879947  | 26879967  | SRRD     | SRR1 domain containing                    | NM_001013694 | 0 | GAGGCGGC0       | nonframeshift deletion  | 91_111del                       | 31_37del           | M9 |
| 13 | 113201853 | 113201867 | TUBGCP3  | Tubulin, gamma complex associated pr      | NM_001286279 | 0 | TGGGAAAG0       | nonframeshift deletion  | 1235_1249del                    | 412_417del         | M9 |
| 8  | 11666219  | 11666224  | FDFT1    | Farnesyl-Diphosphate Farnesyltransfer     | NM_001287750 | 0 | TCCAC           | nonframeshift deletion  | 193_198del                      | 65_66del           | M9 |
| 10 | 46999591  | 46999591  | GPRIN2   | G protein regulated inducer of neurite o  | NM_014696    | 0 | ATGAGGGAG       | nonframeshift insertion | 711_712insATGAGGGAG             | G237delinsGMRE     | M9 |
| 11 | 95825375  | 95825383  | MAML2    | Mastermind-Like 2                         | NM_032427    | 0 | TGCTGCTG0       | nonframeshift deletion  | 1812_1820del                    | 604_607del         | M9 |
| 1  | 209605637 | 209605648 | MIR205HG | MIR205 host gene (non-protein coding)     |              | 0 | AGCAGCAG0       | nonframeshift deletion  | 252_263del                      | 84_88del           | M9 |
| 5  | 140574170 | 140574175 | PCDHB10  | protocadherin beta 10                     | NM_018930    | 0 | AGGCCG          | nonframeshift deletion  | 2045_2050del                    | 682_684del         | M9 |
| 1  | 153907279 | 153907287 | DENND4B  | DENN/MADD Domain Containing 4B            | NM_014856    | 0 | CTGCTGCT0       | nonframeshift deletion  | 2722_2730del                    | 908_910del         | M9 |
| 3  | 10088407  | 10088410  | FANCD2   | Fanconi anemia, complementation grou      | NM_033084    | 0 | AGTA            | frameshift deletion     | 1278_1278del                    | L426fs             | M9 |
| 19 | 55790886  | 55790886  | HSPBP1   | HSPA (heat shock 70kDa) binding prote     | NM_001297600 | 0 | GCCGCCGCC       | nonframeshift insertion | 228_229insGGCGGCGGC             | S77delinsGGGS      | M9 |
| 7  | 131241029 | 131241029 | PODXL    | podocalyxin-like                          | NM_001018111 | 0 | GGCGAC          | nonframeshift insertion | 89_90insGTCGCC                  | P30delinsPSP       | M9 |
| 11 | 6567895   | 6567895   | DNHD1    | dynein heavy chain domain 1               | NM_144666    | 0 | TGCCCTACTGCA    | nonframeshift insertion | 5726_5727insTGCCCTACTGCA        | A1909delinsAALLH   | M9 |
| 2  | 233712210 | 233712230 | GIGYF2   | GRB10 interacting GYF protein 2           | NM_001103147 | 0 | CAGCAGCA0       | nonframeshift deletion  | 3676_3696del                    | 1226_1232del       | M9 |
| 11 | 7818383   | 7818383   | OR5P2    | olfactory receptor, family 5, subfamily P | NM_153444    | 0 | ATATGGTTACCAGGT | nonframeshift insertion | 106_107insGCATCTACCTGGTAACCATAT | S36delinsCIYLVITIS | M9 |
| 2  | 113300002 | 113300026 | POLR1B   | polymerase (RNA) I polypeptide B, 128     | NM_001282772 | 0 | TCCGCGCT0       | frameshift deletion     | 45_69del                        | L15fs              | M9 |
| 21 | 34003928  | 34003928  | SYNJ1    | synaptojanin 1                            | NM_003895    | 0 | AGTATT          | nonframeshift insertion | 4215_4216insAATACT              | L1406delinsNTL     | M9 |

Supplementary Table S5

| Splice variants |           |           |             |                                                                        |              |           |                |               |             |        |
|-----------------|-----------|-----------|-------------|------------------------------------------------------------------------|--------------|-----------|----------------|---------------|-------------|--------|
| Chr             | Start     | End       | Gene symbol | Gene description                                                       | Accession    | Reference | Variant Allele | Variant class | cDNA change | Sample |
| 17              | 41226539  | 41226539  | BRCA1       | breast cancer 1, early onset                                           | NM_007300    | C         | A              | splicing      | 4548-1G>T   | M1     |
| 16              | 586144    | 586144    | CAPN15      | calpain 15                                                             | NM_005632    | T         | C              | splicing      |             | M1     |
| 6               | 70408934  | 70408934  | LMBRD1      | LMBR1 domain containing 1                                              | NM_018368    | C         | T              | splicing      | 1338+1G>A   | M1     |
| 1               | 234556559 | 234556559 | TARBP1      | TAR (HIV-1) RNA binding protein 1                                      | NM_005646    | C         | A              | splicing      | 3445-1G>T   | M1     |
| 12              | 43846499  | 43846499  | ADAMTS20    | ADAM metalloproteinase with thrombospondin type 1 motif, 20            | NM_025003    | C         | T              | splicing      | 1761-1G>A   | M11    |
| X               | 18616735  | 18616735  | CDKL5       | cyclin-dependent kinase-like 5                                         | NM_001037343 | T         | G              | splicing      | 977+2T>G    | M11    |
| 4               | 103806372 | 103806372 | CISD2       | CDGSH iron sulfur domain 2                                             | NM_001008388 | G         | T              | splicing      | 104-1G>T    | M11    |
| 19              | 15756528  | 15756528  | CYP4F3      | cytochrome P450, family 4, subfamily F, polypeptide 3                  | NM_000896    | G         | A              | splicing      | 199-1G>A    | M11    |
| 11              | 30253443  | 30253443  | FSHB        | follicle stimulating hormone, beta polypeptide                         | NM_000510    | G         | A              | splicing      |             | M11    |
| 17              | 39138716  | 39138716  | KRT40       | keratin 40                                                             | NM_182497    | C         | T              | splicing      | 531-1G>A    | M11    |
| 19              | 889637    | 889637    | MED16       | mediator complex subunit 16                                            | NM_005481    | C         | T              | splicing      | 447+1G>A    | M11    |
| 17              | 16068476  | 16068476  | NCOR1       | nuclear receptor corepressor 1                                         | NM_006311    | C         | T              | splicing      | 436-1G>A    | M11    |
| 7               | 151048509 | 151048509 | NUB1        | negative regulator of ubiquitin-like proteins 1                        | NM_001243351 | G         | A              | splicing      | 358-1G>A    | M11    |
| 8               | 43152603  | 43152603  | POTEA       | POTE ankyrin domain family, member A                                   | NM_001005365 | G         | A              | splicing      | 588+1G>A    | M11    |
| 3               | 77651643  | 77651643  | ROBO2       | roundabout, axon guidance receptor, homolog 2 (Drosophila)             | NM_001128929 | G         | A              | splicing      | 3077+1G>A   | M11    |
| 9               | 94808336  | 94808336  | SP TLC1     | serine palmitoyltransferase, long chain base subunit 1                 | NM_001281303 | C         | A              | splicing      | 1082-1G     | M11    |
| 8               | 108297077 | 108297077 | ANGPT1      | angiopoietin 1                                                         | NM_001146    | C         | T              | splicing      | 1039-1G>A   | M16    |
| 1               | 87029343  | 87029343  | CLCA4       | chloride channel accessory 4                                           | NM_012128    | G         | A              | splicing      | 449-1G>A    | M16    |
| 5               | 1323985   | 1323985   | CLPTM1L     | CLPTM1-like                                                            | NM_030782    | C         | T              | splicing      | 1198-1G>A   | M16    |
| 17              | 74470811  | 74470811  | RHBDF2      | rhomboid 5 homolog 2 (Drosophila)                                      | NM_024599    | C         | T              | splicing      | 1389+1G>A   | M16    |
| 15              | 51988071  | 51988071  | SCG3        | secretogranin III                                                      | NM_013243    | G         | A              | splicing      | 869-1G>A    | M16    |
| 6               | 108243115 | 108243115 | SEC63       | SEC63 homolog (S. cerevisiae)                                          | NM_007214    | 0         | GGGG           | splicing      | 340-2->CCCC | M16    |
| 12              | 7080212   | 7080212   | EMG1        | EMG1 N1-specific pseudouridine methyltransferase                       | NM_006331    | 0         | C              | splicing      | 125+1->C    | M16    |
| 3               | 49723167  | 49723167  | MST1        | macrophage stimulating 1 (hepatocyte growth factor-like)               | NM_020998    | T         | G              | splicing      | 1251-2A>C   | M16    |
| 4               | 76836020  | 76836020  | NAAA        | N-acylethanolamine acid amidase                                        | NM_014435    | C         | A              | splicing      | 1116+1G>T   | M17    |
| 2               | 27428217  | 27428217  | SLC5A6      | solute carrier family 5 (sodium/multivitamin and iodide cotransporter) | NM_021095    | C         | A              | splicing      | 734+1G>T    | M17    |
| 17              | 73626918  | 73626918  | RECQL5      | RecQ protein-like 5                                                    | NM_004259    | 0         | TG             | splicing      | 1586-1->CA  | M17    |
| 2               | 68274452  | 68274452  | C1D         | C1D nuclear receptor corepressor                                       |              | C         | A              | splicing      |             | M2     |
| 4               | 190874281 | 190874281 | FRG1        | FSHD region gene 1                                                     | NM_004477    | G         | T              | splicing      | 317+1G>T    | M2     |
| 15              | 44063302  | 44063302  | PDIA3       | protein disulfide isomerase family A, member 3                         | NM_005313    | G         | T              | splicing      | 1405-1G>T   | M2     |
| 10              | 29779774  | 29779774  | SVIL        | supervillin                                                            | NM_021738    | A         | T              | splicing      | 4192+2T     | M2     |
| 7               | 73254452  | 73254453  | WBSCR27     | Williams Beuren syndrome chromosome region 27                          | NM_152559    | TG        | 0              | splicing      |             | M2     |
| 12              | 7080212   | 7080212   | EMG1        | EMG1 N1-specific pseudouridine methyltransferase                       | NM_006331    | 0         | C              | splicing      | 125+1->C    | M2     |
| 17              | 73626918  | 73626918  | RECQL5      | RecQ protein-like 5                                                    | NM_004259    | 0         | TG             | splicing      | 1586-1->CA  | M2     |
| 7               | 93116320  | 93116320  | CALCR       | calcitonin receptor                                                    | NM_001164737 | C         | T              | splicing      | 29-1G>A     | M4     |
| 1               | 19670851  | 19670851  | CAPZB       | capping protein (actin filament) muscle Z-line, beta                   | NM_001282162 | C         | T              | splicing      | 818+1G>A    | M4     |
| 8               | 76472578  | 76472578  | HNF4G       | hepatocyte nuclear factor 4, gamma                                     | NM_004133    | G         | A              | splicing      | 1094-1G>A   | M4     |
| 11              | 68321726  | 68321726  | PPP6R3      | protein phosphatase 6, regulatory subunit 3                            | NM_001164160 | G         | A              | splicing      | 731+1G>A    | M4     |
| 3               | 50220998  | 50220998  | SEMA3F      | sema domain, immunoglobulin domain (Ig), short basic domain, s         | NM_004186    | G         | A              | splicing      | 1233+1G>A   | M4     |
| 5               | 35740230  | 35740230  | SPEF2       | sperm flagellar 2                                                      | NM_024867    | G         | A              | splicing      | 3192-1G>A   | M4     |
| 12              | 7080212   | 7080212   | EMG1        | EMG1 N1-specific pseudouridine methyltransferase                       | NM_006331    | 0         | C              | splicing      | 125+1->C    | M4     |
| 17              | 73626918  | 73626918  | RECQL5      | RecQ protein-like 5                                                    | NM_004259    | 0         | TG             | splicing      | 1586-1->CA  | M4     |
| 5               | 153065890 | 153065890 | GRIA1       | glutamate receptor, ionotropic, AMPA 1                                 | NM_000827    | G         | T              | splicing      | 1134+1G     | M8     |
| 12              | 7080212   | 7080212   | EMG1        | EMG1 N1-specific pseudouridine methyltransferase                       | NM_006331    | 0         | C              | splicing      | 125+1->C    | M8     |
| 17              | 19645526  | 19645526  | ALDH3A1     | aldehyde dehydrogenase 3 family, member A1                             | NM_001135168 | C         | T              | splicing      | 481-1G>A    | M9     |
| 11              | 9191498   | 9191498   | DENND5A     | DENN/MADD domain containing 5A                                         | NM_015213    | T         | C              | splicing      | 2058-2A>G   | M9     |
| 5               | 90059121  | 90059121  | GPR98       | G protein-coupled receptor 98                                          | NM_032119    | G         | A              | splicing      | 12121-1G>A  | M9     |
| 8               | 142486249 | 142486249 | MROH5       | maestro heat-like repeat family member 5                               | NM_207414    | T         | G              | splicing      | 1446-2A>C   | M9     |
| 5               | 101774466 | 101774466 | SLCO6A1     | solute carrier organic anion transporter family, member 6A1            | NM_001289002 | C         | T              | splicing      | 1132-1G>A   | M9     |
| 22              | 37465386  | 37465390  | TMPPRS6     | transmembrane protease, serine 6                                       | NM_001289000 | TGGGG     | 0              | splicing      |             | M9     |
| 3               | 49723167  | 49723167  | MST1        | macrophage stimulating 1 (hepatocyte growth factor-like)               | NM_020998    | T         | G              | splicing      | 1251-2A>C   | M9     |



|       |           |           |                |                                                                                                                                                                                                                                                                                                                                                                                                                                                                                                                                                                                                                                                                                                                                                                                                                                                                                                                                                                                                                                                                                                                                                                                                                                                                                                                                                                                                                                                                                                                                                                                                                                                                                                                                                                                                                                                                                                                                                                                                                                                                                                                                                                                                                                                                                                                                                                                                                                                                                                                                                                                                                                                                                                                                                                                                                                                                                                                                                                                                                                                                                                                                                                                                                                                              |
|-------|-----------|-----------|----------------|--------------------------------------------------------------------------------------------------------------------------------------------------------------------------------------------------------------------------------------------------------------------------------------------------------------------------------------------------------------------------------------------------------------------------------------------------------------------------------------------------------------------------------------------------------------------------------------------------------------------------------------------------------------------------------------------------------------------------------------------------------------------------------------------------------------------------------------------------------------------------------------------------------------------------------------------------------------------------------------------------------------------------------------------------------------------------------------------------------------------------------------------------------------------------------------------------------------------------------------------------------------------------------------------------------------------------------------------------------------------------------------------------------------------------------------------------------------------------------------------------------------------------------------------------------------------------------------------------------------------------------------------------------------------------------------------------------------------------------------------------------------------------------------------------------------------------------------------------------------------------------------------------------------------------------------------------------------------------------------------------------------------------------------------------------------------------------------------------------------------------------------------------------------------------------------------------------------------------------------------------------------------------------------------------------------------------------------------------------------------------------------------------------------------------------------------------------------------------------------------------------------------------------------------------------------------------------------------------------------------------------------------------------------------------------------------------------------------------------------------------------------------------------------------------------------------------------------------------------------------------------------------------------------------------------------------------------------------------------------------------------------------------------------------------------------------------------------------------------------------------------------------------------------------------------------------------------------------------------------------------------------|
| chr1  | 198828056 | 207494816 | M2             | PPFIA4, SNORA77, KRT8P29, HSPE1P6, CBX1P3, LINC00303, RNA5SP74, RNA5SP75, SNRPGP10, LEMD1-AS1, MIR135B, RNU2-19P, RNU6-418P, SRGAP2-AS1, MYOG, C4BPAP1, ADORA1, C4BPAP2, MYBPH, CH13L1, CHIT1, BTG2, FMOD, PRELP, OPTC, ATP2B4, LAX1, ZC3H11A, ZBED6, SNRPE, SOX13, ETNK2, REN, KISS1, GOLT1A, PLEKHA6, PPP1R15B, PIK3C2B, MDM4, MIR181A1HG, MIR181B1, MIR181A1, LRRN2, RNU6-778P, RNU6-716P, RNU6-609P, RNU6-570P, FAM58BP, LINC00862, RPL34P6, MROH3P, RNU6-704P, RPS10P7, IPO9-AS1, MIR5191, RNU6-501P, MIR1231, CRIP1P3, PTPRPV, CYCS4, SLC25A39P1, PCAT6, HNRNPA1P59, NPM1P40, LINC01136, RNU6-487P, NFASC, CNTN2, TMEM81, RBFB5, DSTYK, TMCC2, NUAK2, KLHDC8A, LEMD1, CDK18, MFS4, ELK4, SLC45A3, NUCKS1, RAB7L1, SLC41A1, PM20D1, SLC26A9, FAM72A, AVPR1B, C1orf186, CTSE, SRGAP2, IKKBE, C1orf147, RASSF5, EBBP2, DYRK3, MAPKAPK2, IL10, IL19, IL20, IL24, FAIM3, PIGR, FCAMR, C1orf126, YOD1, PFKFB2, C4BPB, C4BPA, NR5A2, ZNF281, KIF14, DDX59, CAMSAP2, GPR25, C1orf106, KIF21B, CACNA1S, ASCL5, TMEM9, IGFN1, PKP1, TNNT2, LAD1, TNN11, PHLDA3, CSR1P1, NAV1, IPO9, SHISA4, LMOD1, TIMM17A, RNPEP, ELF3, GPR37L1, ARL8A, PTPN7, LGR6, UBE2T, PPP1R12B, SYT2, KDM5B, RAB1F, KLHL12, ADIPOR1, CYBSR1, TMEM183A                                                                                                                                                                                                                                                                                                                                                                                                                                                                                                                                                                                                                                                                                                                                                                                                                                                                                                                                                                                                                                                                                                                                                                                                                                                                                                                                                                                                                                                                                                                                                                                                                                                                                                                                                                                                                                                                                                                                                                                                                                     |
| chr1  | 207494816 | 207933069 | M16,M2         | CD46P1, CD55, CR2, CR1, CR1L, CD46                                                                                                                                                                                                                                                                                                                                                                                                                                                                                                                                                                                                                                                                                                                                                                                                                                                                                                                                                                                                                                                                                                                                                                                                                                                                                                                                                                                                                                                                                                                                                                                                                                                                                                                                                                                                                                                                                                                                                                                                                                                                                                                                                                                                                                                                                                                                                                                                                                                                                                                                                                                                                                                                                                                                                                                                                                                                                                                                                                                                                                                                                                                                                                                                                           |
| chr1  | 207933069 | 214795421 | M2             | C1orf132, RPS26P13, ATP5G2P1, MIR205HG, MIR4260, SERTAD4-AS1, ST13P19, RNU5A-8P, IPO8P1, KCNH1-IT1, LINC00467, SNX25P1, ARPC3P2, FDPSP8, RN7SL344P, RPL21P28, MIR3122, RN7SKP98, SNORA16B, RN7SL512P, RNU6-423P, FLVCR1-AS1, RPL31P13, PROX1-AS1, KRT18P12, ABHD17AP3, CD46, CD34, PLXNA2, CAMK1G, LAMB3, G0S2, HSD11B1, TRAF3IP3, C1orf74, IRF6, D1E9F, SYT14, SERTAD4, HHAT, KCNH1, RCO3R3, TRAF5, RD3, SLC30A1, NEK2, LPGAT1, INTS7, DTL, PPP2R5A, TMEM206, NENF, ATF3, FAM71A, BATF3, NSL1, TATDN3, C1orf227, FLVCR1, VASH2, ANGEL2, RPS6K1C1, PROX1, SMYD2, PTPN14, CENPF                                                                                                                                                                                                                                                                                                                                                                                                                                                                                                                                                                                                                                                                                                                                                                                                                                                                                                                                                                                                                                                                                                                                                                                                                                                                                                                                                                                                                                                                                                                                                                                                                                                                                                                                                                                                                                                                                                                                                                                                                                                                                                                                                                                                                                                                                                                                                                                                                                                                                                                                                                                                                                                                               |
| chr1  | 214795421 | 214826170 | M16,M2         | CENPF                                                                                                                                                                                                                                                                                                                                                                                                                                                                                                                                                                                                                                                                                                                                                                                                                                                                                                                                                                                                                                                                                                                                                                                                                                                                                                                                                                                                                                                                                                                                                                                                                                                                                                                                                                                                                                                                                                                                                                                                                                                                                                                                                                                                                                                                                                                                                                                                                                                                                                                                                                                                                                                                                                                                                                                                                                                                                                                                                                                                                                                                                                                                                                                                                                                        |
| chr1  | 214826170 | 220157599 | M16,M2,M9      | GAPDH2P4, VDACC1P10, MRPS18BP1, SPATA17-AS1, UBBP2, LINC00210, RNU1-141P, RIMKLBP2, ZC3H11B, RNA5SP76, CENPF, KCNK2, KCTD3, USH2A, ESRRG, GPATCH2, SPATA17, RRP15, TGF2, C1orf143, LYPLAL1, SLC30A10, EPRS                                                                                                                                                                                                                                                                                                                                                                                                                                                                                                                                                                                                                                                                                                                                                                                                                                                                                                                                                                                                                                                                                                                                                                                                                                                                                                                                                                                                                                                                                                                                                                                                                                                                                                                                                                                                                                                                                                                                                                                                                                                                                                                                                                                                                                                                                                                                                                                                                                                                                                                                                                                                                                                                                                                                                                                                                                                                                                                                                                                                                                                   |
| chr1  | 220157599 | 222794634 | M2,M9          | MIR215, MIR194-1, RPS15AP12, SNORA36B, MORF41P1, AURKAP5, XRCC6P3, SLMO2P1, RN7SL464P, HDAC1P2, RNU6ATAC35P, HLA-AS1, RNU6-403P, QRSL1P2, C1C1P3, RNU6-791P, EPRS, BPNT1, IARS2, RAB3GAP2, MARK1, C1orf115, MARC2, MARC1, HLX, DUSP10, HHIPL2, TAF1A, MIA3                                                                                                                                                                                                                                                                                                                                                                                                                                                                                                                                                                                                                                                                                                                                                                                                                                                                                                                                                                                                                                                                                                                                                                                                                                                                                                                                                                                                                                                                                                                                                                                                                                                                                                                                                                                                                                                                                                                                                                                                                                                                                                                                                                                                                                                                                                                                                                                                                                                                                                                                                                                                                                                                                                                                                                                                                                                                                                                                                                                                   |
| chr1  | 222794634 | 249213344 | M2             | OR9H1P, HSD17B7P1, OR6R1P, OR2X1P, OR2L9P, OR2L1P, OR2L6P, OR2T32P, OR2M1P, OR2AS2P, OR2AS1P, AHCYP8, MIR3124, RNU6-1205P, RN7SL276P, NDUFB1P2, RNU4-57P, SNRPEP10, RNU6-1248P, PHBP11, ACTBP11, C1C1P5, RNU6-1319P, RN7SKP4P9, MIR320B2, RNU6-1008P, MIR4742, AKR1B1P1, RNU6-1304P, NDUFA3P3, YBX1P9, RN7SKP165, CDKN2AIPNLP1, ITPKB-IT1, ITPKB-AS1, RPS27P5, BTF3P9, TUBB8P10, TUBB8P9, RNA5SP77, ZNF847P, SNAP47-AS1, MIR5008, C1C1P26, MIR3620, FAM96AP2, MIR4666A, HIST3H2BA, BTNL10, RNA5SP19, RNA5S1, RNA5S2, RNA5S3, RNA5S4, RNA5S5, RNA5S6, RNA5S7, RNA5S8, RNA5S9, RNA5S10, RNA5S11, RNA5S12, RNA5S13, RNA5S14, RNA5S15, RNA5S16, RNA5S17, RNA5S18, DUSP5P1, FTH1P2, ISCA1P2, RNU6-180P, RN7SKP276, RNU4-21P, RNA5SP78, HMGN2P19, HMGB1P26, RN7SL467P, RNA5SP79, RN7SL837P, MIR1182, RNA5SP80, SNRP2P2, LINC00582, RNU5A-5P, DISC1-IT1, RN7SL299P, RNU6-1211P, RNU1-74P, RPS7P3, RNU4-77P, MIR4427, RAC1P7, MIR4671, LINC00184, LINC01132, RNY4P16, RN7SL668P, SNORA14B, ARID4B-IT1, MIR4753, RPL23AP23, TBCE-AS1, RPS21P1, MTND6P14, MTND5P19, MTND4P10, MTND3P8, LHM3P2, LYST-AS1, MIR1537, RNU5E-2P, RNU6-968P, RNU2-70P, ENO1P1, LGALS8-AS1, RPL35P1, RN7SKP195, MIR4428, MTND6P15, MTND5P18, YWHAQP9, RNU6-725P, LINC01139, KRT18P32, MIPEP2, CHRM3-AS1, RPS7P5, ADH5P3, RNU5F-8P, PRKRIRP8, RFKP1, HNRNPA1P42, MIR3123, BECN1P1, CFL1P4, RNU6-1139P, TUBB8P6, RNA5SP81, RN7SKP12, RSL24D1P4, RNU6-747P, FCF1P7, MIR4677, FABP7P1, AKT3 IT1, RN7SL148P, TGIF2P1, CYCSP5, HNRNPU-AS1, RN7SKP55, RNU6-947P, RNU6-1089P, RNU6-999P, RNU1-132P, DNAJC19P8, CHCHD4P5, RNU6-1283P, SMYD3-IT1, KIF28P, FGFR3P6, MIR3916, RNA5SP82, VN1R17P, VN1R5, OR2W5, GCSAML-AS1, RNU6-691P, OR14L1P, OR3D1P, MIA3, AIDA, BROX, FAM177B, DISP1, TLR5, SUSD4, C1orf65, CAPN8, CAPN2, TP53BP2, FBXO28, DEGS1, NVL, CN1H4, WDR26, CN1H3, DNAH14, LBR, ENAH, SRP9, EPHX1, TMEM63A, LEFTY1, PYCR2, LEFTY2, SDE2, H3F3A, ACBD3, MX1L1, LIN9, PARP1, C1orf95, ITPKB, PSEN2, ADCK3, CDC42BP4, ZNF678, SNAP47, JMJ4D, PRSS38, WNT9A, WNT3A, ARF1, C1orf35, MRPL55, GUK1, GJC2, IBA57-AS1, IBA57, C1orf145, OBSCN, TRIM11, TRIM17, HIST3H3, HIST3H2BB, RNF187, RHOU, TMEM78, RAB4A, SPHAR, CCSAP, ACTA1, NUP133, ABCB10, TAF6L, URB2, GALNT2, PGBD5, COG2, AGT, CAPN9, C1orf198, TTC13, ARV1, FAM89A, TRIM67, C1orf131, GNAT, EXOC8, SPRTN, EGLN1, TSNAX-DISC1, TSNAX, DISC1, SIPA1L2, MAP10, NTPCR, PCNXL2, KCNK1, SLC35F3, COA6, TARBP1, IRF2B2P2, TOMM20, RBM34, ARID4B, GGP51, TBCE, B3GALNT2, GNG4, LYST, NID1, GPR137B, ERO1LB, EDARADD, LGALS8, HEATR1, ACTN2, MTR, MT1HL1, RYR2, ZP4, MTRNR2L11, CHRM3, FMN2, GREM2, RGS7, FH, KMO, OPN3, CHML, WDR64, EXO1, MAP1L3C3, PLD5, CEP170, SDCCAG8, AKT3, ZBTB18, C1orf100, ADSS, C1orf101, DESJ2, COX20, HNRNPU, EFCAB2, KIF26B, SMYD3, TFB2M, CNST, SCCPDH, AHCTF1, ZNF670, ZNF695, ZNF669, C1orf229, ZNF1129, ZNF496, NLRP3, C1orf111, GCSAML, OR2C2, OR2G2, OR2G3, OR13G1, OR6F1, OR14A2, OR14K1, OR1C1, OR14A16, OR11L1, TRIM58, OR2W3, OR2T8, OR2A1, OR2L13, OR2L8, OR2AK2, OR2L5, OR2L2, OR2L3, OR2M5, OR2M2, OR2M3, OR2M4, OR2T33, OR2T12, OR2M7, OR14C36, OR2T4, OR2T6, OR2T1, OR2T7, OR2T2, OR2T3, OR2T5, OR2G6, OR2T29, OR2T34, OR2T10, OR2T11, OR2T35, OR2T27, OR14I1, LYPD8, SH3BP5L, ZNF672, ZNF692, PGBD2 |
| chr10 | 104154379 | 104184477 | M6             | NFKB2, PSD, FBXL15, CUEDC2                                                                                                                                                                                                                                                                                                                                                                                                                                                                                                                                                                                                                                                                                                                                                                                                                                                                                                                                                                                                                                                                                                                                                                                                                                                                                                                                                                                                                                                                                                                                                                                                                                                                                                                                                                                                                                                                                                                                                                                                                                                                                                                                                                                                                                                                                                                                                                                                                                                                                                                                                                                                                                                                                                                                                                                                                                                                                                                                                                                                                                                                                                                                                                                                                                   |
| chr11 | 126987    | 792179    | M2             | HRAS, LRRC56, C1orf35, RASSF7, PHRF1, IRF7, CDHR5, SCT, DRD4, DEAF1, EPS8L2, TMEM80, TALDO1, PDDC1, CEND1, SLC25A22, BET1L, SCGB1C1, ODF3, RIC8A, SIRT3, PSMD13, NLRP6, ATHL1, IFITM5, IFITM2, IFITM1, IFITM3, B4GALNT4, PKP3, SIGIRR, ANO9, PTDSS2, RNH1, LINC01001, RNU6-447P, RN7SL838P, MIR210HG, MIR120                                                                                                                                                                                                                                                                                                                                                                                                                                                                                                                                                                                                                                                                                                                                                                                                                                                                                                                                                                                                                                                                                                                                                                                                                                                                                                                                                                                                                                                                                                                                                                                                                                                                                                                                                                                                                                                                                                                                                                                                                                                                                                                                                                                                                                                                                                                                                                                                                                                                                                                                                                                                                                                                                                                                                                                                                                                                                                                                                 |
| chr11 | 792179    | 842471    | M2,M6          | SLC25A22, PIDD, RPLP2, PNPLA2, EFCAB4A, CD151, POLR2L, SNORA52                                                                                                                                                                                                                                                                                                                                                                                                                                                                                                                                                                                                                                                                                                                                                                                                                                                                                                                                                                                                                                                                                                                                                                                                                                                                                                                                                                                                                                                                                                                                                                                                                                                                                                                                                                                                                                                                                                                                                                                                                                                                                                                                                                                                                                                                                                                                                                                                                                                                                                                                                                                                                                                                                                                                                                                                                                                                                                                                                                                                                                                                                                                                                                                               |
| chr11 | 842471    | 1774442   | M2             | MUC5AC, MUC5B, TOLLIP, BRSK2, MOB2, DUSP8, KRTAP5-1, KRTAP5-2, KRTAP5-3, KRTAP5-4, KRTAP5-5, IFITM10, CTSD, POLR2L, TSPAN4, CHID1, AP2A2, MUC6, MUC2, RNU6-1025P, TOLLIP-AS1, KRTAP5-AS1, FAM99A, FAM99B                                                                                                                                                                                                                                                                                                                                                                                                                                                                                                                                                                                                                                                                                                                                                                                                                                                                                                                                                                                                                                                                                                                                                                                                                                                                                                                                                                                                                                                                                                                                                                                                                                                                                                                                                                                                                                                                                                                                                                                                                                                                                                                                                                                                                                                                                                                                                                                                                                                                                                                                                                                                                                                                                                                                                                                                                                                                                                                                                                                                                                                     |
| chr11 | 1774442   | 1901385   | M2,M6          | CTSD, SYT8, TNN12, LSP1, RPL36AP39, MIR4298                                                                                                                                                                                                                                                                                                                                                                                                                                                                                                                                                                                                                                                                                                                                                                                                                                                                                                                                                                                                                                                                                                                                                                                                                                                                                                                                                                                                                                                                                                                                                                                                                                                                                                                                                                                                                                                                                                                                                                                                                                                                                                                                                                                                                                                                                                                                                                                                                                                                                                                                                                                                                                                                                                                                                                                                                                                                                                                                                                                                                                                                                                                                                                                                                  |
| chr11 | 1901385   | 4080568   | M2             | CD81-AS1, RPL26P30, PHLDA2, NAP1L4, KCNQ1OT1, COX6CP18, KCNQ1-AS1, KCNQ1DN, SNORA54, CARS-AS1, RNU1-91P, MRGPRG-AS1, NDUFA5P8, NDUFA5P1, TSSC2, OR7E12P, FAM86GP, RPS3AP39, RPS24P14, OR7E117P, TRPC2, RNU6-1143P, RNU7-50P, MIR4687, HNRNPA1P76, RPS29P20, CARS, OSBP5, MRGPRG, MRGPRF, ZNF195, ART5, ART1, CHRNA10, LSP1, NUP98, C1orf89, TNNT3, PGAP2, MRPL23, IGF2, INS-IGF2, INS, RHOG, STIM1, TH, ASCL2, C11orf21, TSPAN32, CD81, TSSC4, TRPM5, KCNQ1, CDKN1C, SLC22A18AS, SLC22A18, LINC01150, MRPL23-AS1, H19, MIR483, IGF2-AS, MIR4686, RNU6-878P                                                                                                                                                                                                                                                                                                                                                                                                                                                                                                                                                                                                                                                                                                                                                                                                                                                                                                                                                                                                                                                                                                                                                                                                                                                                                                                                                                                                                                                                                                                                                                                                                                                                                                                                                                                                                                                                                                                                                                                                                                                                                                                                                                                                                                                                                                                                                                                                                                                                                                                                                                                                                                                                                                   |
| chr11 | 4080568   | 6625398   | M14,M2         | RRM1-AS1, OR55B1P, SSU72P5, SSU72P2, SSU72P6, SSU72P4, SSU72P3, SSU72P7, OR52B3P, OR51R1P, OR52P2P, OR52K3P, OR52M2P, OR51A9P, OR51C1P, OR51F5P, OR51C4P, KRT8P49, OR51F3P, OR51F4P, OR51N1P, OR52Y1P, OR51A8P, OR51H2P, OR51A6P, OR51A3P, OR51A5P, OR51P1P, OR52J2P, OR52E1P, OR52S1P, OR52E3P, OR52J1P, OR52A4, OR51A1P, OR52Z1, HBBP1, OR51AB1P, OR51B3P, OR51B8P, OR51K1P, OR51A10P, OR52V1P, OR52H2P, OR52B5P, OR52T1P, HNRNPA1P53, OR52U1P, OR52P1P, OR56B2P, OR52N3P, OR52E7P, KRT18P58, RNA5SP329, OR56A7P, OR52L2P, OR52X1P, STIM1, RRM1, OR52B4, TRIM21, OR52K2, OR52K1, OR52M1, C11orf40, OR52I2, OR52I1, TRIM68, OR51D1, OR51E1, OR51E2, MMP26, OR51F1, OR52R1, OR51F2, OR51S1, OR51H1P, OR51T1, OR51A7, OR51G2, OR51G1, OR51A4, OR51A2, OR51L1, OR52J3, OR52E2, OR52A5, OR52A1, OR51V1, HBB, HBD, HBG1, HBG2, HBE1, OR51B4, OR51B2, OR51B5, OR51B6, OR51M1, OR51J1, OR51Q1, OR51I1, OR51I2, OR52D1, UBQLN3, UBQLN1, OR52H1, OR52B6, TRIM6, TRIM6-TRIM34, TRIM34, TRIM5, TRIM22, OSMBP1, OR52N4, OR52N5, OR52N1, OR52N2, OR52E6, OR52E8, OR52E4, OR56A3, OR52L1, OR56A4, OR56A1, OR56B4, OR56B3P, OR52B1P, OR52B2, OR52W1, C11orf42, FAM160A2, CCKBR, PRKCOBP, S6P1, APBB1, HPX, TRN3, ARFP12, TIMM10B, DNHD1, RRP8, ILK                                                                                                                                                                                                                                                                                                                                                                                                                                                                                                                                                                                                                                                                                                                                                                                                                                                                                                                                                                                                                                                                                                                                                                                                                                                                                                                                                                                                                                                                                                                                                                                                                                                                                                                                                                                                                                                                                                                                                                                                                         |
| chr11 | 6625398   | 6648458   | M14,M2,M6      | ILK, TAF10, TPP1, DCHS1                                                                                                                                                                                                                                                                                                                                                                                                                                                                                                                                                                                                                                                                                                                                                                                                                                                                                                                                                                                                                                                                                                                                                                                                                                                                                                                                                                                                                                                                                                                                                                                                                                                                                                                                                                                                                                                                                                                                                                                                                                                                                                                                                                                                                                                                                                                                                                                                                                                                                                                                                                                                                                                                                                                                                                                                                                                                                                                                                                                                                                                                                                                                                                                                                                      |
| chr11 | 6648458   | 9759759   | M14,M2         | TMEM98, NRIP3, SCUBE2, DENND5A, TMEM41B, IPO7, ZNF143, GVINP1, GVINP2, MIR302E, OR10AB1P, OR5P4P, OR5P1P, OR5E1P, RNU6-943P, COX6CP5, SNORA3, SNORA45, RNA5SP330, TMEM98-AS1, MIR5691, KRT8P41, SNORA23, RN7SL56P, RN7SKP50, WEE1, SWAP70, DCHS1, MIR17, OR2AG2, OR2AG1, OR6A2, OR10A5, OR10A2, OR10A4, OR2D2, OR2D3, ZNF215, ZNF214, NLRP14, RBMXL2, SYT9, OLFML1, PPFIBP2, CYB5R2, OVCH2, OR5P2, OR5P3, OR10A6, OR10A3, NLRP10, ELRF3, TUB, RIC3, LMO1, STK33, TRIM66, RPL27A, ST5, AKIP1, C11orf16, ASCL3                                                                                                                                                                                                                                                                                                                                                                                                                                                                                                                                                                                                                                                                                                                                                                                                                                                                                                                                                                                                                                                                                                                                                                                                                                                                                                                                                                                                                                                                                                                                                                                                                                                                                                                                                                                                                                                                                                                                                                                                                                                                                                                                                                                                                                                                                                                                                                                                                                                                                                                                                                                                                                                                                                                                                 |
| chr11 | 9759759   | 20906989  | M11,M14,M2     | SBF2-AS1, RNUJ-28P, RNU6ATAC33P, MRV11-AS1, SNORD97, SWAP70, SBF2, ZBED5-AS1, MTND5P21, MIR4299, LINC00958, RASSF10, RN7SKP151, HMGN2P36, FAR1-IT1, RPL39P26, RNA5SP331, SPON1, RNA5SP332, RNU7-49P, CALCP, RN7SL188P, RN7SKP90, RNU6-585P, OR7E14P, SNORD14A, SNORD14B, RNU6-593P, SDHCP4, HIGD1AP5, SAA3P, GLTPP1, SAA2-SAA4, RNA5SP333, ST13P5, RNA5SP334, MIR3159, ADM, SPTY2D1-AS1, AMPD3, PCNAP4, NAV2-IT1, RNA5SP335, NAV2-AS5, NAV2-AS4, MIR4486, MIR4694, NAV2-AS3, NAV2-AS2, NAV2-AS1, MTRNR2L8, RNF141, LYVE1, MRV11, CTR9, EIF4G2, ZBED5, GALNT18, CSNK2A3, USP47, DKK3, MICAL2, MICALCL, PARVA, TEAD1, ARNTL, BTBD10, PTH, FAR1, RRAS2, COBP1, PSMA1, PDE3B, CYP2R1, CALCB, CALCA, INSC, SOX6, C11orf58, PLEKHA7, RPS13, PIK3C2A, NUCB2, NCR3LG1, KCNJN11, ABCC8, USH1C, OTOG, MYOD1, KCNC1, SERGEF, TTH1, SAA1, MRGPRX3, MRGPRX4, SAA4, SAA2, SAA1, HPS5, GTF2H1, LDHA, LDHC, LDHAL6K1, HSG101, UEVLD, SPTY2D1, TMEM86A, IGSF22, PTPN5, MRGPRX1, MRGPRX2, ZDHHC13, CSR3P, EZF8, NAV2, DBX1, HTATIP2, PRMT3, SLC6A5, NELL1                                                                                                                                                                                                                                                                                                                                                                                                                                                                                                                                                                                                                                                                                                                                                                                                                                                                                                                                                                                                                                                                                                                                                                                                                                                                                                                                                                                                                                                                                                                                                                                                                                                                                                                                                                                                                                                                                                                                                                                                                                                                                                                                                                                                                      |
| chr11 | 20906989  | 31828473  | M11,M14,M16,M2 | RNA5SP336, RNA5SP337, RNA5SP338, PRKRIRP4, RNU6-783P, RPL36AP40, BDNF-AS, RNA5SP339, LINC00678, CBX3P1, MIR610, RN7SKP158, OR2BH1P, HNRNPRP2, RN7SL240P, RPL7AP58, CYCSP25, NELL1, ANO5, SLC17A6, FANCF, GAS2, SVIP, CCDC179, LUZP2, ANO3, MUC15, SLC5A12, FIBIN, BBOX1, CCDC34, LGR4, LIN7C, BDNF, KIF18A, METTL15, KCNA4, FSHB, ARL14E4P, MPED2, DCDC1, DNAJC24, IMMP1L, ELP4, PAX6                                                                                                                                                                                                                                                                                                                                                                                                                                                                                                                                                                                                                                                                                                                                                                                                                                                                                                                                                                                                                                                                                                                                                                                                                                                                                                                                                                                                                                                                                                                                                                                                                                                                                                                                                                                                                                                                                                                                                                                                                                                                                                                                                                                                                                                                                                                                                                                                                                                                                                                                                                                                                                                                                                                                                                                                                                                                        |
| chr11 | 31828473  | 43343686  | M11,M14,M2     | EIF4A2P5, WT1-AS, HNRNPA3P9, PIGCP1, CSTF3-AS1, RPL29P23, CIR1P3, MIR1343, KRT18P14, MIR3973, LINC00610, RPL7AP56, RNU6-99P, RNU6-365P, HNRNPKP3, PAX6, RCN1, WT1, EIF3M, CCDC73, PRRG4, QSER1, DEPDC7, TCG11L1, CSTF3, HIPK3, KIAA1549L, C11orf91, CD59, FBXO3, LMO2, CAPRIN1, NAT10, APTB2, CAT, ELF5, EHF, APIP, PDHX, CD44, SLC1A2, PAMR1, FJX1, TRIM44, LDLRAD3, COMMD9, PRR5L, TRAF6, RAG1, RAG2, C1orf74, LRR4C, API5                                                                                                                                                                                                                                                                                                                                                                                                                                                                                                                                                                                                                                                                                                                                                                                                                                                                                                                                                                                                                                                                                                                                                                                                                                                                                                                                                                                                                                                                                                                                                                                                                                                                                                                                                                                                                                                                                                                                                                                                                                                                                                                                                                                                                                                                                                                                                                                                                                                                                                                                                                                                                                                                                                                                                                                                                                 |

|       |           |           |        |                                                                                                                                                                                                                                                                                                                                                                                                                                                                                                                                                                                                                                                                                                                                                                                                                                                                                                                                                                                                                                                                                                                                                                                                                                                                                                                                                                                                                                                                                                                                                                                                                                                                                                                                                                                                                                                                                                                                                                                                                                                                                                                                                                                                                                                                                                                                                                                           |
|-------|-----------|-----------|--------|-------------------------------------------------------------------------------------------------------------------------------------------------------------------------------------------------------------------------------------------------------------------------------------------------------------------------------------------------------------------------------------------------------------------------------------------------------------------------------------------------------------------------------------------------------------------------------------------------------------------------------------------------------------------------------------------------------------------------------------------------------------------------------------------------------------------------------------------------------------------------------------------------------------------------------------------------------------------------------------------------------------------------------------------------------------------------------------------------------------------------------------------------------------------------------------------------------------------------------------------------------------------------------------------------------------------------------------------------------------------------------------------------------------------------------------------------------------------------------------------------------------------------------------------------------------------------------------------------------------------------------------------------------------------------------------------------------------------------------------------------------------------------------------------------------------------------------------------------------------------------------------------------------------------------------------------------------------------------------------------------------------------------------------------------------------------------------------------------------------------------------------------------------------------------------------------------------------------------------------------------------------------------------------------------------------------------------------------------------------------------------------------|
| chr11 | 43343686  | 44331431  | M14,M2 | RN7SKP287, CTBP2P6, MIR670HG, MIR670, MIR129-2, SEC14L1P1, ALKBH3-AS1, API5, TTC17, HSD17B12, ALKBH3, C11orf96, ACCSL, ACCS, EXT2, ALX4                                                                                                                                                                                                                                                                                                                                                                                                                                                                                                                                                                                                                                                                                                                                                                                                                                                                                                                                                                                                                                                                                                                                                                                                                                                                                                                                                                                                                                                                                                                                                                                                                                                                                                                                                                                                                                                                                                                                                                                                                                                                                                                                                                                                                                                   |
| chr11 | 44331431  | 46564948  | M2     | RPL34P22, MIR4688, MIR3160-1, MIR3160-2, ALX4, CD82, TSPAN18, TP53I11, PRDM11, SYT13, CHST1, SLC35C1, CRY2, MAPK8IP1, C11orf94, PEX16, GYLTL1B, PHF21A, CREB3L1, DGKZ, MDK, CHRM4, AMBRA1                                                                                                                                                                                                                                                                                                                                                                                                                                                                                                                                                                                                                                                                                                                                                                                                                                                                                                                                                                                                                                                                                                                                                                                                                                                                                                                                                                                                                                                                                                                                                                                                                                                                                                                                                                                                                                                                                                                                                                                                                                                                                                                                                                                                 |
| chr11 | 47189737  | 47204587  | M6     | ARFGAP2, PACSIN3                                                                                                                                                                                                                                                                                                                                                                                                                                                                                                                                                                                                                                                                                                                                                                                                                                                                                                                                                                                                                                                                                                                                                                                                                                                                                                                                                                                                                                                                                                                                                                                                                                                                                                                                                                                                                                                                                                                                                                                                                                                                                                                                                                                                                                                                                                                                                                          |
| chr11 | 47644252  | 47660603  | M17,M8 | MTCH2                                                                                                                                                                                                                                                                                                                                                                                                                                                                                                                                                                                                                                                                                                                                                                                                                                                                                                                                                                                                                                                                                                                                                                                                                                                                                                                                                                                                                                                                                                                                                                                                                                                                                                                                                                                                                                                                                                                                                                                                                                                                                                                                                                                                                                                                                                                                                                                     |
| chr11 | 47660603  | 47688615  | M17    | MTCH2, AGBL2                                                                                                                                                                                                                                                                                                                                                                                                                                                                                                                                                                                                                                                                                                                                                                                                                                                                                                                                                                                                                                                                                                                                                                                                                                                                                                                                                                                                                                                                                                                                                                                                                                                                                                                                                                                                                                                                                                                                                                                                                                                                                                                                                                                                                                                                                                                                                                              |
| chr11 | 55029657  | 55038594  | M1     | TRIM48                                                                                                                                                                                                                                                                                                                                                                                                                                                                                                                                                                                                                                                                                                                                                                                                                                                                                                                                                                                                                                                                                                                                                                                                                                                                                                                                                                                                                                                                                                                                                                                                                                                                                                                                                                                                                                                                                                                                                                                                                                                                                                                                                                                                                                                                                                                                                                                    |
| chr11 | 63953664  | 64107743  | M6     | STIP1, FERMT3, TRPT1, NUDT22, DNAJC4, VEGFB, FKBP2, PPP1R14B, PLCB3, BAD, GPR137, KCNK4, TEX40, ESRRA, TRMT112, PRDX5, CCDC88B                                                                                                                                                                                                                                                                                                                                                                                                                                                                                                                                                                                                                                                                                                                                                                                                                                                                                                                                                                                                                                                                                                                                                                                                                                                                                                                                                                                                                                                                                                                                                                                                                                                                                                                                                                                                                                                                                                                                                                                                                                                                                                                                                                                                                                                            |
| chr11 | 65149412  | 65688398  | M6     | KCNK7, MAP3K11, PCNXL3, SIPA1, REL, KAT5, RNASEH2C, AP5B1, OVOL1, CFL1, SNX32, MUS81, EFEMP2, CTSW, FIBP, CCDC85B, FOSL1, C11orf68, DRAP1, NEAT1, MALAT1, SNRPGP19, SSSCA1-AS1, MIR4690, MIR4489, RN7SL309P, KRT8P26, OVOL1-AS1, SLC25A45, FRMD8, SCYL1, LTBP3, SSSCA1, FAM89B, EHPB1L1                                                                                                                                                                                                                                                                                                                                                                                                                                                                                                                                                                                                                                                                                                                                                                                                                                                                                                                                                                                                                                                                                                                                                                                                                                                                                                                                                                                                                                                                                                                                                                                                                                                                                                                                                                                                                                                                                                                                                                                                                                                                                                   |
| chr11 | 67766642  | 67864597  | M2     | ALDH3B1, MIR4691, UNC93B1, NDUFS8, TCIRG1, CHKA                                                                                                                                                                                                                                                                                                                                                                                                                                                                                                                                                                                                                                                                                                                                                                                                                                                                                                                                                                                                                                                                                                                                                                                                                                                                                                                                                                                                                                                                                                                                                                                                                                                                                                                                                                                                                                                                                                                                                                                                                                                                                                                                                                                                                                                                                                                                           |
| chr11 | 68685203  | 72695261  | M2     | MIR3164, IFITM9P, ANO1-AS2, RNU6-1175P, ANO1-AS1, H2AFZP4, MIR548K, SHANK2-AS1, SHANK2-AS2, SHANK2-AS3, MIR3664, KRTAP5-14P, OR7E87P, UNC93B6, OR7E4P, RPS3AP41, ENPP7P8, ALG1L9P, ZNF705E, RNA5SP342, OR7E128P, OR7E126P, RNU6-292P, MIR3165, RPEP6, MIR139, RNU7-105P, ARAP1-AS1, ARAP1-AS2, RPS12P20, MIR4692, RNU6-672P, IGHMBP2, MRGPRD, MRGPRF, TPCN2, MYEOV, CCND1, ORAOV1, FGF19, FGF4, FGF3, ANO1, FADD, PPFIA1, CTTN, SHANK2, DHCR7, NADSYN1, KRTAP5-7, KRTAP5-8, KRTAP5-9, KRTAP5-10, KRTAP5-11, FAM86C1, DEFB108B, RNF121, IL18BP, NUMA1, LRTOMT, LAMTOR1, ANAPC15, FOLR3, FOLR1, FOLR2, INPPL1, PHOX2A, CLPB, PDE2A, ARAP1, STARD10, ATG16L2, FCHSD2                                                                                                                                                                                                                                                                                                                                                                                                                                                                                                                                                                                                                                                                                                                                                                                                                                                                                                                                                                                                                                                                                                                                                                                                                                                                                                                                                                                                                                                                                                                                                                                                                                                                                                                         |
| chr11 | 72696106  | 79151695  | M2     | GUCY2EP, RNU7-59P, HRF1P16, RSF1-IT1, RNU6-126P, KCTD21-AS1, RNU6-311P, COPS8P3, MIR708, MIR5579, OR8R1P, HMG2P38, RN7SKP243, CCDC58P5, RNA5SP343, HNRNPA1P40, MIR548AL, CYCSP27, RANP3, RN7SKP297, MIR4696, RN7SL239P, RNU6-216P, OR2AT2P, NPM1P50, OR2AT1P, ZDHHC20P3, MIR326, SNORD15A, SNORD15B, RN7SL786P, PPP1R1A1P1, RNA5SP344, FCHSD2, P2RY2, P2RY6, ARHGEP17, RELT, FAM168A, PLEKH81B, RAB6A, MRPL48, COA4, PAAF1, DNAJB13, UCP2, UCP3, C2CD3, PPME1, P4HA3, PGM2L1, KCNE3, LIPT2, POLD3, CHRDL2, RNF169, XRRA1, SPCS2, NEU3, OR2AT4, SLCO2B1, TPBGL, ARRB1, RPS3, KLHL35, GDDP5, SERPINH1, MAP6, MOGAT2, DGAT2, UVARG, WNT11, PKRIR, C11orf30, LRRCC32, TSKU, ACER3, B3GNT6, CAPN5, OMP, MYO7A, GDPD4, PAK1, CLNS1A, AQP11, RSF1, AAMDC, INTS4, KCTD14, NDUFC2-KCTD14, THRSP, NDUFC2, ALG8, KCTD21, USP35, GAB2, NARS2, TENM4                                                                                                                                                                                                                                                                                                                                                                                                                                                                                                                                                                                                                                                                                                                                                                                                                                                                                                                                                                                                                                                                                                                                                                                                                                                                                                                                                                                                                                                                                                                                                   |
| chr11 | 85622323  | 87029178  | M11    | SLC25A1P1, RNU6-560P, SETP17, RN7SL225P, PTP4A1P6, OR7E13P, OR7E2P, HNRNPPC8, CCDC83, PICALM, EED, C11orf73, CCDC81, ME3, PRSS23, FZD4, TMEM135                                                                                                                                                                                                                                                                                                                                                                                                                                                                                                                                                                                                                                                                                                                                                                                                                                                                                                                                                                                                                                                                                                                                                                                                                                                                                                                                                                                                                                                                                                                                                                                                                                                                                                                                                                                                                                                                                                                                                                                                                                                                                                                                                                                                                                           |
| chr11 | 87029178  | 92568250  | M11,M9 | PSMA2P1, RNU6-1135P, RNU6-1063P, MIR3166, GAPDHP70, GRM5-AS1, RNU6-16P, CBX3P7, FOLH1B, UBTF12, TRIM64DP, TRIM53BP, TRIM51BP, MTND1P35, TRIM49D2P, TRIM64, TRIM51EP, TRIM53AP, TRIM64EP, UBTF11, DISC1FP1, MIR4490, MIR1261, OSBPL9P2, OSBPL9P3, TUBB4BP4, RPL7AP57, NDUFB11P1, PGAM1P9, RPS3AP42, TMEM135, RAB38, CTSC, GRM5, TYR, NOX4, TRIM77, TRIM49, TRIM64B, TRIM49D1, TRIM49C, NAALAD2, CHORDC1, FAT3                                                                                                                                                                                                                                                                                                                                                                                                                                                                                                                                                                                                                                                                                                                                                                                                                                                                                                                                                                                                                                                                                                                                                                                                                                                                                                                                                                                                                                                                                                                                                                                                                                                                                                                                                                                                                                                                                                                                                                              |
| chr11 | 92568250  | 92569731  | M9     | FAT3                                                                                                                                                                                                                                                                                                                                                                                                                                                                                                                                                                                                                                                                                                                                                                                                                                                                                                                                                                                                                                                                                                                                                                                                                                                                                                                                                                                                                                                                                                                                                                                                                                                                                                                                                                                                                                                                                                                                                                                                                                                                                                                                                                                                                                                                                                                                                                                      |
| chr11 | 92569731  | 105483161 | M11,M9 | CASP4, CASP5, CASP1, CARD16, CARD17, CARD18, GRIA4, SNRPGP16, RPL26P31, RN7SL223P, SCARNA9, SNORA25, SNORA32, SNORD6, SNORA1, SNORA8, SNORD5, SNORA18, MIR1304, SNORA40, RN7SL195P, HPRTP4, HPRTP3, MIR548L, LINC01171, ST13P11, CWC15, SRSF8, RNA5SP345, MIR1260B, JRKL-AS1, RNA5SP346, MED28P5, RNA5SP347, RN7SKP53, RPA2P3, RN7SL222P, RN7SKP115, RN3920, RNU6-952P, WTAPP1, MMP12, RNU7-159P, MTND2P26, MTND1P36, MIR4693, RNA5SP348, CASP1P1, OR2AL1P, FAT3, MTNR1B, SLC36A4, CCDC67, SMOCA, KIAA1731, TAF1D, C11orf54, MED17, VSTM5, HEPHL1, PANX1, FOLR4, GPR83, MRE11A, ANKRD49, PIWIL4, FUT4, AMOTL1, KDM4D, KDM4E, ENODD1, SEN33, FAM76B, CEP57, MTMR2, MAML2, CCDC82, JRKL, CNTN5, XRHGAP42, TMEM133, PGR, TRPC6, ANGPLT5, KIAA1377, C11orf70, YAP1, BIRC3, BIRC2, TMEM213, MMP7, MMP20, MMP27, MMP8, MMP10, MMP1, MMP3, MMP13, DCUN1D5, DYNC2H1, PDGFG, DDI1, CASP12                                                                                                                                                                                                                                                                                                                                                                                                                                                                                                                                                                                                                                                                                                                                                                                                                                                                                                                                                                                                                                                                                                                                                                                                                                                                                                                                                                                                                                                                                                          |
| chr11 | 105483161 | 107463949 | M9     | GRIA4, MSANTD4, KBTBD3, AASDHPTT, GUCY1A2, CWF19L2, ALKBH8, ELMOD1, RNU4-55P, RNU6-277P, SMCARCE1P1                                                                                                                                                                                                                                                                                                                                                                                                                                                                                                                                                                                                                                                                                                                                                                                                                                                                                                                                                                                                                                                                                                                                                                                                                                                                                                                                                                                                                                                                                                                                                                                                                                                                                                                                                                                                                                                                                                                                                                                                                                                                                                                                                                                                                                                                                       |
| chr12 | 88256     | 149412    | M16    | DDX11L8, FAM138D                                                                                                                                                                                                                                                                                                                                                                                                                                                                                                                                                                                                                                                                                                                                                                                                                                                                                                                                                                                                                                                                                                                                                                                                                                                                                                                                                                                                                                                                                                                                                                                                                                                                                                                                                                                                                                                                                                                                                                                                                                                                                                                                                                                                                                                                                                                                                                          |
| chr12 | 3390899   | 6219748   | M16    | RNU6-174P, HSPA8P5, CCND2-AS1, CCND2-AS2, RN7SL69P, TSPAN9, PRMT8, EFCAB4B, PARP11, CCND2, C12orf5, FGF23, FGF6, C12orf4, RAD51AP1, DYRK4, AKAP3, NDUFA9, GALNT8, KCNA6, KCNA1, KCNA5, NTF3, ANO2, VWF                                                                                                                                                                                                                                                                                                                                                                                                                                                                                                                                                                                                                                                                                                                                                                                                                                                                                                                                                                                                                                                                                                                                                                                                                                                                                                                                                                                                                                                                                                                                                                                                                                                                                                                                                                                                                                                                                                                                                                                                                                                                                                                                                                                    |
| chr12 | 6952186   | 7083551   | M6     | RPL13P5, DSTNP2, RNU7-1, EMG1, MIR200C, MIR141, SCARNA12, GNB3, CDCA3, USP5, TPI1, SPSB2, LRRCC23, ENO2, ATN1, C12orf57, PTPN6, PHB2                                                                                                                                                                                                                                                                                                                                                                                                                                                                                                                                                                                                                                                                                                                                                                                                                                                                                                                                                                                                                                                                                                                                                                                                                                                                                                                                                                                                                                                                                                                                                                                                                                                                                                                                                                                                                                                                                                                                                                                                                                                                                                                                                                                                                                                      |
| chr12 | 7252496   | 7802292   | M16    | PEX5, ACSM4, CD163L1, CD163, APOBEC1, C1RL-AS1, RNU6-485P, GAPDHP31, NIFKP3, C1RL, RBP5, CLSTN3                                                                                                                                                                                                                                                                                                                                                                                                                                                                                                                                                                                                                                                                                                                                                                                                                                                                                                                                                                                                                                                                                                                                                                                                                                                                                                                                                                                                                                                                                                                                                                                                                                                                                                                                                                                                                                                                                                                                                                                                                                                                                                                                                                                                                                                                                           |
| chr12 | 9067315   | 12340053  | M16    | PHC1, M6PR, KLRG1, A2M, PZP, KLRB1, CLEC2D, CLEC1L, CD69, KLRF1, CLEC2B, KLRF2, CLEC2A, CLEC12A, CLEC1B, CLEC12B, CLEC9A, CLEC1A, CLEC7A, OLR1, TMEM52B, GABARAPL1, KLRD1, KLRCA, KLRK1, KLRK1, KLRK4, KLRC3, KLRC2, KLRC1, MAGOHB, STYK1, YBX3, TAS2R7, TAS2R8, TAS2R9, PRR4, TAS2R13, PRH2, TAS2R13, PRH2, TAS2R14, TAS2R15, TAS2R16, TAS2R17, TAS2R18, TAS2R19, TAS2R20, TAS2R21, TAS2R22, TAS2R23, TAS2R24, PRB3, PRB4, PRB1, PRB2, ETV6, BCL2L14, LRP6, HNRNP1P34, LINC00612, A2M-AS1, TPT1P12, RNU7-189P, A2M1P, PTMAP4, LINC00987, DDX12P, RNU6-700P, GOT2P3, RN7SKP161, HNRNPABP1, SLC25A39P2, KLRAP1, HSPE1P12, TAS2R15, TAS2R63P, TAS2R64P, TAS2R65P, RNU6-676P, TAS2R67P, HIGD1A8P, RNU7-60P                                                                                                                                                                                                                                                                                                                                                                                                                                                                                                                                                                                                                                                                                                                                                                                                                                                                                                                                                                                                                                                                                                                                                                                                                                                                                                                                                                                                                                                                                                                                                                                                                                                                                   |
| chr12 | 38710556  | 41423021  | M16,M9 | RPL30P13, RNU6-713P, ALG10B, CPNE8, KIF21A, ABCD2, C12orf40, SLC2A13, LRRK2, MUC19, CNTN1                                                                                                                                                                                                                                                                                                                                                                                                                                                                                                                                                                                                                                                                                                                                                                                                                                                                                                                                                                                                                                                                                                                                                                                                                                                                                                                                                                                                                                                                                                                                                                                                                                                                                                                                                                                                                                                                                                                                                                                                                                                                                                                                                                                                                                                                                                 |
| chr12 | 41423021  | 48468576  | M9     | RNA5SP360, MTND2P17, MTND1P24, RN7SL10P, RNU6-249P, MRPS36P5, EEF1A1P17, RNA5SP361, PLEKHA8P1, RNU6-671P, LINC00938, RN7SL246P, KNOP1P2, OR7A19P, MIR4698, PCED1B-AS1, MIR4494, CNTN1, PDZRN4, GXYLT1, YAF2, PPHLN1, ZCRB1, PRICKLE1, ADAMTS20, PUS7L, IRAK4, TWF1, TMEM117, NELL2, DBX2, ANO6, ARID2, SCAF11, SLC38A1, SLC38A2, SLC38A4, AMIGO2, PCED1B, RPA3, ENDOU, RAPGEF3, SLC48A1, HDAC7, VDR, TMEM106C, COL2A1, SENP1                                                                                                                                                                                                                                                                                                                                                                                                                                                                                                                                                                                                                                                                                                                                                                                                                                                                                                                                                                                                                                                                                                                                                                                                                                                                                                                                                                                                                                                                                                                                                                                                                                                                                                                                                                                                                                                                                                                                                              |
| chr12 | 59267836  | 64173909  | M16    | RPS8P22, RNU6-279P, RNU6-871P, RNU4-20P, RPL21P104, KRT8P19, RPS3P6, KLF17P1, RNU6-595P, RNU6-399P, MIRLET71, RPL32P26, GAPDHP44, RNU1-83P, RPL14P1, LDHAL6CP, RSL24D1P5, HNRNPA1P69, LRIG3, SLC16A7, FAM19A2, USP15, MON2, C12orf61, PPM1H, AVPR1A, DRY19L2, TMEM5                                                                                                                                                                                                                                                                                                                                                                                                                                                                                                                                                                                                                                                                                                                                                                                                                                                                                                                                                                                                                                                                                                                                                                                                                                                                                                                                                                                                                                                                                                                                                                                                                                                                                                                                                                                                                                                                                                                                                                                                                                                                                                                       |
| chr12 | 70989828  | 75602986  | M16    | PTPRB, FAHD2P1, MRS2P2, TRHDE-AS1, PTPRR, CHCHD3P2, RNU6-1012P, TSPAN8, LGR5, ZFC3H1, THAP2, TMEM19, RAB21, TBC1D15, TPH2, TRHDE, ATXN7L3B, KCNC2                                                                                                                                                                                                                                                                                                                                                                                                                                                                                                                                                                                                                                                                                                                                                                                                                                                                                                                                                                                                                                                                                                                                                                                                                                                                                                                                                                                                                                                                                                                                                                                                                                                                                                                                                                                                                                                                                                                                                                                                                                                                                                                                                                                                                                         |
| chr12 | 75602986  | 88542281  | M16,M9 | GLIPR1L1, GLIPR1L2, GLIPR1, KRR1, CCDC59, PHLDA1, NAP1L1, METTL25, TMTC2, SLC6A15, TSPAN19, LRRIQ1, BBS10, ALX1, RASSF9, OSBPL8, NTS, MGAT4C, C12orf50, C12orf29, ZDHHC17, CEP290, TMTC3, CSRP2, E2F7, NAV3, SYT11, RN7SL734P, RNU6-1271P, RN7SKP172, YWHAQP7, RPL7P43, PAWR, PPP1R12A, MIR1252, RN7SL696P, RNA5SP363, SNRPGP20, RPL7P38, RNU7-106P, RN7SKP261, MIR617, MIR618, MIR4699, OTOGL, RNU6-977P, RPL6P25, RPL23AP68, CYCSP30, MKRN9P, PTPRQ, RPS4XP15, RNA5SP364, MYF6, MYF5, LIN7A, ACS3, PPFIA2, KCNC2, CAPS2                                                                                                                                                                                                                                                                                                                                                                                                                                                                                                                                                                                                                                                                                                                                                                                                                                                                                                                                                                                                                                                                                                                                                                                                                                                                                                                                                                                                                                                                                                                                                                                                                                                                                                                                                                                                                                                                 |
| chr12 | 88542281  | 88570096  | M9     | TMTC3                                                                                                                                                                                                                                                                                                                                                                                                                                                                                                                                                                                                                                                                                                                                                                                                                                                                                                                                                                                                                                                                                                                                                                                                                                                                                                                                                                                                                                                                                                                                                                                                                                                                                                                                                                                                                                                                                                                                                                                                                                                                                                                                                                                                                                                                                                                                                                                     |
| chr12 | 122219535 | 122248124 | M6     | TMEM120B, RHOF, SETD1B                                                                                                                                                                                                                                                                                                                                                                                                                                                                                                                                                                                                                                                                                                                                                                                                                                                                                                                                                                                                                                                                                                                                                                                                                                                                                                                                                                                                                                                                                                                                                                                                                                                                                                                                                                                                                                                                                                                                                                                                                                                                                                                                                                                                                                                                                                                                                                    |
| chr13 | 19427325  | 34398053  | M14    | HMGAI1P6, RNY3P4, LINC00362, RNU6-58P, TATDN2P3, SDAD1P4, RPLP1P13, SACS-AS1, LINC00327, LINC00352, MTCO3P2, C1QTNF9B-AS1, ANKRD20A19P, IPO7P2, MIR2276, SPATA13-AS1, C1QTNF9-AS1, NUS1P3, LINC00566, CYCSP33, TPT2P6, PSCP1P2, RNY1P7, RPL26P34, IRX1P1, ANKRD20A10P, TPT2P1, SLC25A15P3, RPL34P27, AMER2-AS1, LINC01053, LINC01076, RPL23AP69, TCEB2P1, RN7SL289P, RNU6-78P, RN7SL741P, RNY1P3, LINC00415, ATP8A2P3, PRUNEP1, PRKRIRP6, RPS3AP44, WASF3-AS1, FGFR10P2P1, RPS21P8, RPS20P32, USP12-AS1, USP12-AS2, LINC00412, SNORD102, SNORA27, RNU6-70P, LINC01079, RNY1P1, RNU6-63P, NPM1P4, RNU6-73P, PDX1-AS1, LINC00543, RN7SL272P, KATNBL1P1, CHCHD2P8, PAN3-AS1, EEF1A1P3, RNU6-82P, EIF4A1P7, RNU6-53P, CYP51A1P2, POM12L13P, MTUS2-AS2, GAPDHP69, MTUS2-AS1, TIMM8BP1, LINC00297, LINC00572, LINC00544, LINC00365, LINC00384, LINC00385, RNU6-64P, PRDX2P1, LINC00427, LINC00426, LINC01058, UBE2L5P, RBM22P2, MFAP1P1, PTPN2P2, LINC00398, TEX26-AS1, LINC00545, LINC01066, WDR95P, ANKRD26P4, EEF1DP3, LINC01073, FRY-AS1, IFIT1P1, ATP8A2P2, RNY1P4, LINC00423, TOMM22P3, STARD13-IT1, STARD13-AS, TUBA3C, TPTE2, MPHOSPH8, PSCP1, ZMYM5, ZMYM2, GJA3, GJB2, GJB6, CRYL1, IFT88, IL17D, N6AMT2, XPO4, LATS2, SAP18, SKA3, MRP63, ZDHHC20, MUC2, FGF9, SGCG, SACS, TNFRSF19, MIPEP, C1QTNF9B, SPATA13, C1QTNF9, PARP4, ATP12A, RNF17, CENPJ, PABPC3, AMER2, MTMR6, NUPL1, ATP8A2, SHISA2, RNF6, CDK8, WASF3, GPR12, USP12, RPL21, RASL11A, GTF3A, MTF13, LNX2, POLR1D, GSX1, PDX1, ATP5EP2, CDX2, URAD, FLT3, PAN3, FLT1, POMP, SLC46A3, MTUS2, SLC7A1, UBL3, KATNAL1, HMGB1, USPL1, ALOX5AP, MEDAG, TEX26, HSPH1, B3GALT1, RFXP2, FRY, ZAR1L, BRCA2, N4BP2L1, N4BP2L2, PDS5B, KL, STARD13, RFC3, ANKRD20A9P, RNU6-55P, RNU6-76P, SNX19P2, LINC00408, PHF2P2, LINC00442, USP24P1, GTF2IP3, RNA5SP24, CENPIP1, RNU6-52P, SMPD4P2, PSCP1P1, ANKRD26P3, MRPL3P1, LINC00421, PARP4P2, FAM58DP, SLC25A15P2, CYCSP32, MRPS31P2, ESRRAP1, CASC4P1, LINC00350, RN7SL166P, ST6GALNAC4P1, KRR1P1, LINC01072, PPIAP28, LINC00556, MIR4499, SLC35E1P1, RNU2-7P, RANP8, CNOT4P1, HNRNPA130, PPIAP27, RPSAP5A, RNU6-51P, RNU4-9P, RPS12P23, IPPKP1, RN7SL80L, LINC01046, ESRRAP2, MIPEEP3, GRK6P1, GAPDHP52, RNA5SP25, ZDHHC20-IT1, HIST1H2BPS3, FNTAP2, RNU6-59P, RPS7P10, RN7SL766P, LINC00424, NME1P1, MTND3P1, FTH1P7, DDX39AP1, RPL7AP73, IPMKP1, RFESDP1, LINC00621, BASP1P1, NUS1P2 |

|       |           |           |            |                                                                                                                                                                                                                                                                                                                                                                                                                                                                                                                                                                                                                                                                                                                                                                                                                                                                                                                                                                                                                                                                                                                                                                                                                                                                                                                                                                                                                                                                                                                                                                                                                                                                                                                                                                                                                                                                                                                                                                                                                                                                                                                                                                                                                                                                                                    |
|-------|-----------|-----------|------------|----------------------------------------------------------------------------------------------------------------------------------------------------------------------------------------------------------------------------------------------------------------------------------------------------------------------------------------------------------------------------------------------------------------------------------------------------------------------------------------------------------------------------------------------------------------------------------------------------------------------------------------------------------------------------------------------------------------------------------------------------------------------------------------------------------------------------------------------------------------------------------------------------------------------------------------------------------------------------------------------------------------------------------------------------------------------------------------------------------------------------------------------------------------------------------------------------------------------------------------------------------------------------------------------------------------------------------------------------------------------------------------------------------------------------------------------------------------------------------------------------------------------------------------------------------------------------------------------------------------------------------------------------------------------------------------------------------------------------------------------------------------------------------------------------------------------------------------------------------------------------------------------------------------------------------------------------------------------------------------------------------------------------------------------------------------------------------------------------------------------------------------------------------------------------------------------------------------------------------------------------------------------------------------------------|
| chr13 | 34398053  | 40301685  | M14,M16    | RNU5A-4P, VDACC1P12, LINC00457, GAMTP2, SCAND3P1, PHBP13, LINC00445, RNU6-71P, HIST1H2APS6, GAPDHP34, TCEAL4P1, ARL2BPP3, NDE1P2, SMAD9-AS1, LAMTOR3P1, RPL29P28, EIF4A1P5, RNTSKP1, RPS12P24, LINC01048, RNA5SP26, HSPD1P9, LINC00571, LINC00437, LINC00366, PRDX3P3, RNU6-56P, FREM2-AS1, PLA2G12AP2, ANKRD26P2, NXX1P1, MIR4305, RFC3, NBEA, MBL21L1, DCLK1, SOHLH2, CCDC169-SOHLH2, CCDC169, SPG20, SPG20OS, CCNA1, SERTM1, RFXAP, SMAD9, ALG5, EXOSC8, SUPT20H, CSNK1A1L, POSTN, TRPC4, UFM1, FREM2, STOML3, PROSER1, NHLRC3, LHFP, COG6                                                                                                                                                                                                                                                                                                                                                                                                                                                                                                                                                                                                                                                                                                                                                                                                                                                                                                                                                                                                                                                                                                                                                                                                                                                                                                                                                                                                                                                                                                                                                                                                                                                                                                                                                      |
| chr13 | 40301685  | 60548485  | M14        | RNY4P14, CDKN2AIPNLP3, AZU1P1, LINC00332, RPL17P51, RNY3P9, RNTSKP2, LINC00598, RLIMP1, MIR320D1, MIR621, TPTE2P5, CYCSP34, SUGT1P3, RGS17P1, MIR3168, RN7SL597P, CALM2P3, MORF4L1P4, RAC1P3, RNU6-57P, TUBBP2, OR7E36P, OR7E155P, OR7E37P, MIR5006, RN7SL515P, RNU6-74P, KARS1P, RPS28P8, MAPK6P3, CHCHD2P11, FHP1, FABP3P2, LINC01050, LINC00428, ZDHHC4P1, LINC00400, RPL36P19, ENOX1-AS2, ENOX1-AS1, LINC00284, DGKZP1, LINC00390, SMIM2-IT1, LINC01071, SMARCE1P5, LINC00407, LINC00330, RN7SL49P, RNTSKP3, RNU6-69P, SNORA31, TPT1-AS1, RCN1P2, SLC25A30-AS1, PPIAP25, RNA5SP27, TIMM9P3, COX411P2, LINC01055, AKR1B1P4, CPB2-AS1, RN7SL288P, RNTSKP5, FAM206BP, LINC00563, RNU2-6P, RNU6-68P, PPP1R2P4, OR7E101P, COX17P1, FKBP1AP3, HTR2A-AS1, GNG5P5, RN7SL700P, NAP1L4P3, RPL27AP8, LINC00444, LINC00562, SUCLA2-AS1, MED4-AS1, POLR2K2P2, LINC00441, PPP1R26P1, PCNPP5, LINC01077, LINC00462, PSME2P2, RNU6-60P, RAD17P2, RNY3P2, COX7CP1, OGFOD1P1, SNRPGP14, RNY4P30, CTAGE10P, RNY4P9, MIR3613, DLEU2, MIR16-1, RPL18P10, ST13P4, RPL34P26, DLEU-AS1, RNA5SP28, RNASEH2B-AS1, GUCY1B2, RNA5SP29, LINC00371, RPL5P31, SLMO2P2, MIR5693, INTS5E-AS1, RPS4XP16P, RN7SL320P, SNRPGP11, MIR4703, RNU6-65P, RNY1P6, RN7SL413P, ATP5F1P1, CTAGE3P, FABP5P2, MRPS31P5, TPTE2P2, RNY4P24, LINC00345, TPTE2P3, MRPS31P4, MIR759, PPIAP26, LINC01065, PCDH8P1, RN7SL618P, LINC00558, LINC00458, RPL13AP25, MIR5007, HNF4G1P1, SPATA2P1, RNTSKP6, PRR20FP, MTCO2P3, SLC25A5P4, RPL31P53, RNA5SP30, LINC00374, RNY4P29, CTAGE16P, DNAJA1P1, HMG2P23P, POLR3K1P1, RPP40P2, RNU7-88P, COG6, FOXO1, MRPS31, SLC25A15, E1, WBP4, KBTBD6, KBTBD7, MTRF1, NAA16, RGCC, VWA8, DGKH, AKAP11, TNFSF11, FAM216B, EPST11, DNAJC15, ENOX1, CCDC122, LACC1, SMIM2, SERP2, TSC22D1, NUFIP1, GPALPP1, GTF2F2, KCTD4, TPT1, SLC25A30, COG3, FAM194B, SPERT, SIAH3, ZC3H13, CPB2, LCP1, LRRC63, KIAA0226L, LRCH1, ESD, HTRA2A, SUCLA2, NUDT15, MED4, ITM2B, RB1, LPAR6, RCBT2, CYSLTR2, FNDC3A, MLNR, CDADC1, CAB39L, SETDB2, PHF11, RCBT1, ARL11, EBPL, KPNA3, SPRYD7, TRIM13, KCNRG, DLEU1, DEU, RNASEH2B, FAM124A, SERPINE3, INTS6, WDFY2, DHRS12, CCDC70, ATP7B, ALG11, UTP14C, NEK5, NEK3, THSD1, VPS36, CKAP2, HNRNPA1L2, SUGT1, LECT1, PCDH8, OLFM4, PRR20A, PRR20B, PRR20C, PRR20D, PRR20E, PCDH17, DIAPH3 |
| chr13 | 60548485  | 61068568  | M14,M8     | DIAPH3-AS1, RN7SL375P, DIAPH3-AS2, RNY4P28, LINC00434, TARDBPP2, DIAPH3, TDRD3                                                                                                                                                                                                                                                                                                                                                                                                                                                                                                                                                                                                                                                                                                                                                                                                                                                                                                                                                                                                                                                                                                                                                                                                                                                                                                                                                                                                                                                                                                                                                                                                                                                                                                                                                                                                                                                                                                                                                                                                                                                                                                                                                                                                                     |
| chr13 | 61068568  | 73318699  | M14,M16,M8 | RNA5SP31, EIF4A1P6, LINC00378, RNY3P5, RNY4P31, MIR3169, RAC1P8, LINC00358, LINC01075, LINC01074, LINC00459, RPL32P28, SQSTM1P1, LINC00448, LINC00376, LINC00395, OR7E156P, RNU6-81P, PPP1R2P10, OR7E104P, NYFAP1, LINC00355, LGMNP1, STARP1, HNRNPA3P5, LINC01052, MIR548X2, MIR4704, TRIM60P19, PCDH9-AS1, RNU7-87P, PCDH9-AS2, PCDH9-AS3, PCDH9-AS4, RPSAF3, LINC00364, BCRP9, NPM1P22, OR7E111P, OR7E33P, ELL2P3, HNRNPA1P18, RPL37P21, RPS3AP52, RPL12P34, RN7SL761P, ZDHHC20P4, SNRPF3P, LINC00383, LINC00401, SRSF1P1, RNY3P10, PSMC1P13, ATXN8OS, RNU6-54P, SOGA2P1, LINC00348, RABEPK1, H3F3BP1, RPL21P109, RPL35AP31, RPS10P21, RN2A5P32, RPL18AP17, RPL21P110, RNU6-80P, TDRD3, PCDH20, PCDH9, KLHL1, DACH1, MZT1, BORA                                                                                                                                                                                                                                                                                                                                                                                                                                                                                                                                                                                                                                                                                                                                                                                                                                                                                                                                                                                                                                                                                                                                                                                                                                                                                                                                                                                                                                                                                                                                                                 |
| chr13 | 73318699  | 77566058  | M14,M8     | RNU6-79P, PSM210P3, FABP5P1, RNU6-66P, RNU4-10P, RNY1P8, MARK2P12, LINC00393, LINC00392, LINC00402, RNY1P5, RPL21P108, LINC00381, LINC00347, RIOK3P1, RNU6-38P, SSR1P2, CTAGE11P, LINC01078, TBC1D4-AS1, FAM204CP, LINC00561, LINC01034, RN7SL571P, BTF3P11, RPL7P44, DHX9P1, BORA, DIS3, PIBF1, KLF5, KLF12, TBC1D4, COMMD6, UCHL3, LMO7, C13orf45, KCTD12, IRG1, CLN5                                                                                                                                                                                                                                                                                                                                                                                                                                                                                                                                                                                                                                                                                                                                                                                                                                                                                                                                                                                                                                                                                                                                                                                                                                                                                                                                                                                                                                                                                                                                                                                                                                                                                                                                                                                                                                                                                                                            |
| chr13 | 77566058  | 92003532  | M14,M8,M9  | MYCBP2-AS1, MYCBP2-AS2, SCEL-AS1, RNY3P7, SPTLC1P5, MIR3665, EDNRB-AS1, RN2F19-AS1, RN7SL810P, LINC01069, LINC00446, SRGNP1, RNY3P3, RPL31P54, TCEB1P23, RPL21P111, LINC00331, HSPD1P8, CCT5P2, NIP2A5, BCAS2P3, RNA5SP33, RBM26-AS1, NDFIP2-AS1, LINC01068, LINC01038, LINC00382, RNU6-61P, HNRNPA1P31, PWWP2AP1, ARF4P4, DPPA3P3, LINC00564, RNU6-77P, HIGD1AP2, PTMAP5, GYG1P2, RNU6-67P, VENTXP2, UBE2D3P4, MTND4P1, MTND5P3, LINC00333, LINC00375, LINC00351, RNU6-72P, MOB1AP1, DDX6P2, TXNL1P1, LINC00430, UBBP5, LIN28AP2, MIR4500HG, MIR4500, LINC00397, TET1P1, RPL29P29, LINC00433, LINC00560, GRPEL2P1, LINC01047, TRIM60P19, LINC00440, SP3P, LINC01040, LINC00353, RPL7L1P1, PEX12P1, LINC00559, RNA5SP34, FAR1P1, KRT18P27, MIR622, LINC01049, RNU6-75P, LINC00410, BRK1P2, LINC00380, LINC00379, PPIAP23, MIR17HG, CLN5, FBXL3, MYCBP2, SCEL, SLAIN1, EDNRB, POU4F1, RNF219, RBM26, NDFIP2, SPRY2, SLITRK1, SLITRK6, SLITRK5                                                                                                                                                                                                                                                                                                                                                                                                                                                                                                                                                                                                                                                                                                                                                                                                                                                                                                                                                                                                                                                                                                                                                                                                                                                                                                                                                       |
| chr13 | 92003532  | 111953851 | M14,M9     | LINC00363, HNRNPA1P29, GPC6-AS2, RNA5SP35, GPC6-AS1, RNA5SP36, RN7SL585P, LINC00391, SOX21-AS1, BRD7P5, RPL21P112, LINC00557, RNU6-62P, RNY3P8, RNY4P27, MEMO1P5, CLDN10-AS1, DNAJC3-AS1, MTND5P2, MTND6P18, MTCYBP3, HMGNP1P24, RN7SL164P, AMMECR1L1P1, HSP90AB6P, LINC00359, TULP3P1, RN7SKP7, LINC00456, RNA5SP37, PSMA6P4, RPL7AP61, FTLP8, RNTSKP8, MIR3170, FARP1-AS1, STK24-AS1, NUS1P4, CYCSP35, CALM2P4, RN7SL60P, DOCK9-AS1, RPL7L1P12, RNU6-83P, DOCK9-AS2, RPS6P23, GAPDH2P2, UBAC2-AS1, RNTSKP9, H2AFZP3, MIR623, HMG83P4, CCR12P, LINC00449, RNY3P6, LINC01039, CFL1P8, MIR4306, CLYBL-AS2, CLYBL-AS1, LINC00554, NDUFA12P1, ASNSP3, RPL15P18, PCCA-AS1, RPS26P47, COX5BP6, NALCN-AS1, ARF4P3, LINC00411, RNU1-24P, HMG83P7, MIR2681, LIPT1P1, RNY1P2, MIR4705, RPL39P29, FGF14-IT1, FGF14-AS1, FGF14-AS2, LINC00555, LINC00283, RNY5P8, METTL21E1P, ATP6V1G1P7, RPL7P45, DAOA-AS1, LINC00343, RNA5SP38, LINC00460, RPL35P9, LINC00551, LINC00443, ATP5G1P8, PPIAP24, MIR1267, FAM155A-IT1, RNA5SP39, HCF2P1, MYO16-AS2, MYO16-AS1, LINC00370, LINC01067, LINC00399, LINC00676, RNTSKP10, LINC00396, RN7SL783P, COL4A2-AS2, COL4A2-AS1, RPL21P107, LINC00567, ANKRD10-IT1, PARP1P1, LINC00431, LINC00368, ARHGFE7-AS2, ARHGFE7-IT1, ARHGFE7-AS1, MIR17HG, RNU4ATAC3P, FABP5P4, GPC5-AS2, GPC5-IT1, MIR548AS, GPC5-AS1, GPC5, GPC6, DCT, TGDS, GPR180, SOX21, ABCCC4, CLDN10, DZFP1, DNAJC3, UGGT2, HS6ST3, OXGR1, MBNL2, RAP2A, IPO5, FARP1, RNF113B, STK24, SLC15A1, DOCK9, UBAC2, GPR18, GPR183, TM9SF2, CLYBL, ZIC5, ZIC2, PCCA, GGACT, TMTC4, NALCN, ITGBL1, FGF14, TPP2, METTL21C, CCDC168, TEX30, KDELC1, BIVM, BIVM-ERCC5, ERCC5, SLC10A2, DAOA, EFN2, ARG1U1, FAM155A, LIG4, ABHD13, TNFSF13B, MYO16, IRS2, COL4A1, COL4A2, RAD20, CARKD, CARSD, ING1, LINC00346, ANKRD10, ARHGFE7                                                                                                                                                                                                                                                                                                                                                                                                                                                                                           |
| chr13 | 111953851 | 115092802 | M9         | LINC00354, LINC00404, LINC00403, LINC01070, LINC01043, LINC01044, ATP11A-AS1, MCF2L-AS1, F10-AS1, KARS2P1, LDHBP1, GRTP1-AS1, DCUN1D2-AS, RNU1-16P, LINC00552, GAS6-AS1, GAS6-AS2, LINC00454, LINC00452, LINC00565, RASA3-IT1, MIR548AR, MIR4502, CLCP2, ARHGFE7, TEX29, SOX1, SPACAT, TUBGCP3, C13orf35, ATP11A, MCF2L, F7, F10, PROZ, PCID2, CUL4A, LAMP1, GRTP1, ADPRHL1, DCUN1D2, TMC03, TFPD1, ATP4B, GRK1, TMEM255B, GAS6, RASA3, CDC16, UPF3A, CHAMP1                                                                                                                                                                                                                                                                                                                                                                                                                                                                                                                                                                                                                                                                                                                                                                                                                                                                                                                                                                                                                                                                                                                                                                                                                                                                                                                                                                                                                                                                                                                                                                                                                                                                                                                                                                                                                                       |
| chr14 | 19378082  | 20793754  | M14        | OR11H12, POTE6, POTE8, OR4N2, OR4Q3, OR4M1, OR4K2, OR4K5, OR4K1, OR4K15, OR4Q2, OR4K14, OR4K13, OR4L1, OR4K17, OR4N5, OR11G2, OR11H6, OR11H7, OR11H4, TTC5, CCNB1P1, ARHGAP42P5, NF1P4, MED15P1, RNU6-1239P, GRAMD4P3, BMS1P17, DUXAP10, OR11H13P, BMS1P18, GRAMD4P4, RNU6-1268P, MED15P6, ARHGAP42P4, OR11H2, OR11K2P, OR4H12P, OR4N1P, OR4K6P, OR4K3, OR4K4P, OR4K16P, OR4U1P, RNA5SP380, OR4T1P, RNA5SP381, PSM8P1, OR11G1P, OR11H5P                                                                                                                                                                                                                                                                                                                                                                                                                                                                                                                                                                                                                                                                                                                                                                                                                                                                                                                                                                                                                                                                                                                                                                                                                                                                                                                                                                                                                                                                                                                                                                                                                                                                                                                                                                                                                                                            |
| chr14 | 24836282  | 25103311  | M14        | NFATC4, NYNRIIN, CBLN3, KHNYN, SDR39U1, CMA1, CTSG, GZMH, GZMB                                                                                                                                                                                                                                                                                                                                                                                                                                                                                                                                                                                                                                                                                                                                                                                                                                                                                                                                                                                                                                                                                                                                                                                                                                                                                                                                                                                                                                                                                                                                                                                                                                                                                                                                                                                                                                                                                                                                                                                                                                                                                                                                                                                                                                     |
| chr14 | 25103311  | 31103243  | M14,M16    | SCFD1, HMG2N2P6, OR7K1P, CYB5AP5, NOVA1-AS1, MIR4307, LINC00645, BNP3P1, RPL26P3, EIF4A1P12, BTF3P2, RNU6-864P, RNU11-5P, RNU6-1234P, SYF2P1, GZMB, STXB6P, NOVA1, FOXG1, C14orf23, PRKD1, G2E3                                                                                                                                                                                                                                                                                                                                                                                                                                                                                                                                                                                                                                                                                                                                                                                                                                                                                                                                                                                                                                                                                                                                                                                                                                                                                                                                                                                                                                                                                                                                                                                                                                                                                                                                                                                                                                                                                                                                                                                                                                                                                                    |
| chr14 | 31103243  | 31856325  | M14        | SCFD1, COCH, STRN3, AP4S1, HECTD1, HEATR5A, UBE2CP1, HIGD1AP17, MIR624, RPL21P5, RNU6-541P                                                                                                                                                                                                                                                                                                                                                                                                                                                                                                                                                                                                                                                                                                                                                                                                                                                                                                                                                                                                                                                                                                                                                                                                                                                                                                                                                                                                                                                                                                                                                                                                                                                                                                                                                                                                                                                                                                                                                                                                                                                                                                                                                                                                         |
| chr14 | 31856325  | 34420284  | M14,M16    | HEATR5A, DTD2, GPR33, NUBPL, ARHGAP5, AKAP6, NPAS3, EGLN3, RNU6-602P, RNU6-455P, ARHGAP5-AS1, RNU6-7, RNU6-8, RN7SL660P                                                                                                                                                                                                                                                                                                                                                                                                                                                                                                                                                                                                                                                                                                                                                                                                                                                                                                                                                                                                                                                                                                                                                                                                                                                                                                                                                                                                                                                                                                                                                                                                                                                                                                                                                                                                                                                                                                                                                                                                                                                                                                                                                                            |
| chr14 | 34420284  | 54989241  | M14        | RNU6ATAC30P, RNU6-539P, RN7SL3, RN7SL2, RNU6-189P, PDLIM1P1, RN7SKP193, MIR4504, SNRPGP1, RN7SL452P, ZFP64P1, LINC00519, LINC00640, SETP2, FRMD6-AS2, RNU6-1291P, RNU6-1033P, RNA5SP385, RNU6-301P, OR7E105P, OR7E106P, OR7E159P, COX5AP2, RN7SL588P, RPS3AP46, MIR5580, ATP5C1P1, EGLN3, SPTSSA, EAPP, SNX6, CFL2, BAZ1A, SRP54, FAM177A1, PPP2R3C, KIAA0391, PSMA6, NFKBIA, INSM2, RALGAPA1, EGLN3-AS1, RNU1-27P, RNU1-28P, RPS19P3, RNU6-1261P, RNU7-41P, BRMS1L, MBIP, IGBP1P1, RPL7AP3, RPL9P3, DNAJC8P1, RPS3AP4, KRT18P6, QRSL1P3, NUIP, IGTF2P2, ILF2P2, LINC00609, PTCSC3, SFTA3, RNTSKP21, DPPA3P2, RNU7-93P, NKX2-1-AS1, PHKBP2, RPL29P3, RNTSKP257, MIR4503, RNU6-273P, RNU6-886P, NKX2-1, RNU6-1277P, LINC00517, KRT8P1, NKX2-8, PAX9, LINC00639, SLC25A21, RPL7AP2, SLC25A21-AS1, MIPOL1, HNRNPU1P1, KRT8P2, SNORD127, RNU6-552P, DNAJC19P9, LINC00871, RPA2P1, RPL13AP2, RPS15AP3, MIR548P, LINC00648, RNU6-297P, RNA5SP384, RPL32P29, RN7SL1, RHOQP1, FOXA1, TTC6, SSTR1, CLEC14A, SEC23A, GEMIN2, TRAPP6B, PNN, MIA2, CTAGE5, FBXO33, LRFN5, FSCB, C14orf28, KLHL28, FAM179B, PRPF39, FKBP3, FANCM, M18BP1, RPL10L, MDGA2, RPS29, LRR1, RPL36AL, MGAT2, DNAAF2, POLE2, KLHDC1, KLHDC2, NEMF, ARF6, C14orf182, C14orf183, VCPKMT, SOS2, L2HGDH, ATP5S, CDKL1, MAP4K5, ATL1, SAV1, NIN, PYGL, ABHD12B, TRIM9, TMX1, FRMD6, GNG2, C14orf166, NID2, PTDGR, PTGER2, TXNDC16, GPR137C, ERO1L, PSMC6, STYX, GNPAT1, FERMT2, DDHD1, BMP4, CDKN3, CNIH1, GMFB, CGRRF1                                                                                                                                                                                                                                                                                                                                                                                                                                                                                                                                                                                                                                                                                                                                                                                                                      |
| chr14 | 59655442  | 60212812  | M14        | MIR5586, DAAM1, GPR135, L3HYPDH, JKAMP, CCDC175, RTN1                                                                                                                                                                                                                                                                                                                                                                                                                                                                                                                                                                                                                                                                                                                                                                                                                                                                                                                                                                                                                                                                                                                                                                                                                                                                                                                                                                                                                                                                                                                                                                                                                                                                                                                                                                                                                                                                                                                                                                                                                                                                                                                                                                                                                                              |
| chr14 | 101365293 | 101391157 | M17        | MEG8, MIR370                                                                                                                                                                                                                                                                                                                                                                                                                                                                                                                                                                                                                                                                                                                                                                                                                                                                                                                                                                                                                                                                                                                                                                                                                                                                                                                                                                                                                                                                                                                                                                                                                                                                                                                                                                                                                                                                                                                                                                                                                                                                                                                                                                                                                                                                                       |
| chr14 | 101391157 | 101451184 | M17,M8     | MEG8, SNORD113-1, SNORD113-2, SNORD113-3, SNORD113-4, SNORD113-5, SNORD113-6, SNORD113-7, SNORD113-8, SNORD113-9, SNORD113-10, SNORD113-11, SNORD113-12, SNORD113-13, SNORD113-14, SNORD113-15, SNORD113-16, SNORD113-17, SNORD113-18, SNORD113-19, SNORD114-1, SNORD114-2, SNORD114-3, SNORD114-4, SNORD114-5, SNORD114-6, SNORD114-7, SNORD114-8, SNORD114-9, SNORD114-10, SNORD114-11, SNORD114-12, SNORD114-13, SNORD114-14, SNORD114-15, SNORD114-16, SNORD114-17, SNORD114-18, SNORD114-19, SNORD114-20, SNORD114-21, SNORD114-22, SNORD114-23, SNORD114-24                                                                                                                                                                                                                                                                                                                                                                                                                                                                                                                                                                                                                                                                                                                                                                                                                                                                                                                                                                                                                                                                                                                                                                                                                                                                                                                                                                                                                                                                                                                                                                                                                                                                                                                                  |
| chr14 | 101451184 | 101489757 | M17        | SNORD114-24, SNORD114-25, SNORD114-26, SNORD114-27, SNORD114-28, SNORD114-29, SNORD114-30, SNORD114-31, MIR379, MIR411                                                                                                                                                                                                                                                                                                                                                                                                                                                                                                                                                                                                                                                                                                                                                                                                                                                                                                                                                                                                                                                                                                                                                                                                                                                                                                                                                                                                                                                                                                                                                                                                                                                                                                                                                                                                                                                                                                                                                                                                                                                                                                                                                                             |
| chr14 | 103570333 | 103806057 | M6         | LINC00677, RPL21P12, GCSHP2, LINC00605, RPL21P13, RAP2CP1, SNORA28, EXOC3L4, TNFAIP2, EIF5                                                                                                                                                                                                                                                                                                                                                                                                                                                                                                                                                                                                                                                                                                                                                                                                                                                                                                                                                                                                                                                                                                                                                                                                                                                                                                                                                                                                                                                                                                                                                                                                                                                                                                                                                                                                                                                                                                                                                                                                                                                                                                                                                                                                         |

|       |          |           |         |                                                                                                                                                                                                                                                                                                                                                                                                                                                                                                                                                                                                                                                                                                                                                                                                                                                                                                                                                                                                                                                                                                                                                                                                                                                                                                                                                                                                                                                                                                                                                                                                                                                                                                                                                                                                                                                                                                                                                                                                                                                                                                                                                                                                                                                                                                                                                                                                                                                                                                                                                                                                                                                                                                                                                                                                                                                                                                                                                                                                                                                                                                                                                                                                                                                                                                                                                                                                                                                                                                                                                                                                                                                                                                                                                                                                                                                                                                                                                                                                                                                                                                                                                                                                                                                                                                                                                |
|-------|----------|-----------|---------|------------------------------------------------------------------------------------------------------------------------------------------------------------------------------------------------------------------------------------------------------------------------------------------------------------------------------------------------------------------------------------------------------------------------------------------------------------------------------------------------------------------------------------------------------------------------------------------------------------------------------------------------------------------------------------------------------------------------------------------------------------------------------------------------------------------------------------------------------------------------------------------------------------------------------------------------------------------------------------------------------------------------------------------------------------------------------------------------------------------------------------------------------------------------------------------------------------------------------------------------------------------------------------------------------------------------------------------------------------------------------------------------------------------------------------------------------------------------------------------------------------------------------------------------------------------------------------------------------------------------------------------------------------------------------------------------------------------------------------------------------------------------------------------------------------------------------------------------------------------------------------------------------------------------------------------------------------------------------------------------------------------------------------------------------------------------------------------------------------------------------------------------------------------------------------------------------------------------------------------------------------------------------------------------------------------------------------------------------------------------------------------------------------------------------------------------------------------------------------------------------------------------------------------------------------------------------------------------------------------------------------------------------------------------------------------------------------------------------------------------------------------------------------------------------------------------------------------------------------------------------------------------------------------------------------------------------------------------------------------------------------------------------------------------------------------------------------------------------------------------------------------------------------------------------------------------------------------------------------------------------------------------------------------------------------------------------------------------------------------------------------------------------------------------------------------------------------------------------------------------------------------------------------------------------------------------------------------------------------------------------------------------------------------------------------------------------------------------------------------------------------------------------------------------------------------------------------------------------------------------------------------------------------------------------------------------------------------------------------------------------------------------------------------------------------------------------------------------------------------------------------------------------------------------------------------------------------------------------------------------------------------------------------------------------------------------------------------------|
| chr15 | 20739496 | 22840340  | M16,M2  | GOLGA6L6, POTE2B, IGH4OR15-5B, IGH4OR15-4B, IGH4OR15-3B, IGH4OR15-2B, IGH4OR15-1B, POTE2B, OR4M2, OR4N4, IGHV1OR15-1, IGHV4OR15-8, GOLGA6L1, TUBGCP5, GOLGA8CP, RN7SL759P, SPATA31E2P, IGHV1OR15-6, NBEAP1, RNU6-498P, GRAMD4P5, MIR3118-4, MIR3118-6, RNU6-749P, NF1P1, MIR5701-1, MIR5701-2, CT60, OR11J2P, OR11J5P, KIAA0125P2, RN7SL400P, BMS1P16, RNU6-1235P, CXADR2P, GRAMD4P6, RNU6-631P, NF1P2, OR11J1P, OR11H3P, OR11K1P, OR4Q1P, OR4H6P, OR4N3P, IGHV1OR15-3, IGHV1OR15-4, MIR1268A, MIR4509-1, MIR4509-2, ABCB10P1, GOLGA8DP, RN7SL545P, ELMO2P1                                                                                                                                                                                                                                                                                                                                                                                                                                                                                                                                                                                                                                                                                                                                                                                                                                                                                                                                                                                                                                                                                                                                                                                                                                                                                                                                                                                                                                                                                                                                                                                                                                                                                                                                                                                                                                                                                                                                                                                                                                                                                                                                                                                                                                                                                                                                                                                                                                                                                                                                                                                                                                                                                                                                                                                                                                                                                                                                                                                                                                                                                                                                                                                                                                                                                                                                                                                                                                                                                                                                                                                                                                                                                                                                                                                    |
| chr15 | 22840340 | 28391382  | M2      | TUBGCP5, CYFIP1, NIP2A, NIP1A, GOLGA8I, GOLGA8S, GOLGA6L2, MKRN3, MAGEL2, NDN, NPAP1, SNRPN, SNURF, UBE3A, ATP10A, GABRB3, GABRA5, GABRG3, OCA2, HERC2, WHAMMP3, RN7SL495P, HERC2P2, HERC2P7, GOLGA8EP, RN7SL106P, SPATA31E3P, RN7SL536P, MIR4508, RNU6-741P, PWRN4, PWRN2, PWRN3, PWRN1, RPL5P1, SNHG14, SNORD64, SNORD108, PWAR6, SNORD109A, SNORD116-1, SNORD116-2, SNORD116-3, SNORD116-5, SNORD116-6, SNORD116-7, SNORD116-8, SNORD116-9, SNORD116-10, SNORD116-11, SNORD116-12, SNORD116-13, SNORD116-14, SNORD116-15, SNORD116-16, SNORD116-17, SNORD116-18, SNORD116-19, SNORD116-21, SNORD116-20, SNORD116-23, SNORD116-24, SNORD116-25, SNORD116-26, SNORD116-27, SNORD116-29, SNORD116-30, TMEM261P1, SNORD115-1, SNORD115-2, SNORD115-3, SNORD115-4, SNORD115-5, SNORD115-6, SNORD115-8, SNORD115-9, SNORD115-10, SNORD115-11, SNORD115-12, SNORD115-14, SNORD115-15, SNORD115-16, SNORD115-17, SNORD115-18, SNORD115-19, SNORD115-20, SNORD115-21, SNORD115-22, SNORD115-23, SNORD115-24, SNORD115-25, SNORD115-27, SNORD115-28, SNORD115-29, SNORD115-30, SNORD115-31, SNORD115-32, SNORD115-33, SNORD115-34, SNORD115-35, SNORD115-36, SNORD115-37, SNORD115-38, SNORD115-39, SNORD115-40, SNORD115-41, SNORD115-42, SNORD115-43, SNORD115-44, SNORD115-45, SNORD115-47, SNORD115-48, SNORD109B, RNA5SP390, MIR4715, LINC00929, TVP23BP1, RNA5SP391, RPL5P32                                                                                                                                                                                                                                                                                                                                                                                                                                                                                                                                                                                                                                                                                                                                                                                                                                                                                                                                                                                                                                                                                                                                                                                                                                                                                                                                                                                                                                                                                                                                                                                                                                                                                                                                                                                                                                                                                                                                                                                                                                                                                                                                                                                                                                                                                                                                                                                                                                                                                                                                                                                                                                                                                                                                                                                                                                                                                                                                                                    |
| chr15 | 28391382 | 28996820  | M17,M2  | HERC2, GOLGA8F, GOLGA8G, GOLGA8M, RPL41P2, RN7SL238P, ABCB10P3, MIR4509-1, MIR4509-2, ABCB10P4, RN7SL829P, HERC2P9, RN7SL719P, WHAMMP2                                                                                                                                                                                                                                                                                                                                                                                                                                                                                                                                                                                                                                                                                                                                                                                                                                                                                                                                                                                                                                                                                                                                                                                                                                                                                                                                                                                                                                                                                                                                                                                                                                                                                                                                                                                                                                                                                                                                                                                                                                                                                                                                                                                                                                                                                                                                                                                                                                                                                                                                                                                                                                                                                                                                                                                                                                                                                                                                                                                                                                                                                                                                                                                                                                                                                                                                                                                                                                                                                                                                                                                                                                                                                                                                                                                                                                                                                                                                                                                                                                                                                                                                                                                                         |
| chr15 | 28996820 | 33261678  | M2      | APBA2, FAM189A1, NDNL2, TJP1, GOLGA8J, GOLGA8T, CHRFA7A, GOLGA8R, GOLGA8Q, GOLGA8H, ARHGAP11B, FAN1, MTMR10, TRPM1, KLF13, OTUD7A, CHRNA7, GOLGA8K, GOLGA8O, GOLGA8N, ARHGAP11A, SCG5, GREM1, FMN1, WHAMMP2, GOLGA6L7P, TUBBP8, HMG2N2P5, RN7SL673P, DNMI1P28, ULK4P3, RN7SL469P, DNMI1P30, RNU6-17P, RN7SL196P, RN7SL796P, DNMI1P50, ULK4P2, RN7SL628P, GOLGA8UP, RN7SL82P, HERC2P10, RNU6-466P, MIR211, UBE2CP4, RNU6-18P, DNMI1P31, RN7SL185P, ULK4P1, DNMI1P32, RN7SL539P, RN7SL286P                                                                                                                                                                                                                                                                                                                                                                                                                                                                                                                                                                                                                                                                                                                                                                                                                                                                                                                                                                                                                                                                                                                                                                                                                                                                                                                                                                                                                                                                                                                                                                                                                                                                                                                                                                                                                                                                                                                                                                                                                                                                                                                                                                                                                                                                                                                                                                                                                                                                                                                                                                                                                                                                                                                                                                                                                                                                                                                                                                                                                                                                                                                                                                                                                                                                                                                                                                                                                                                                                                                                                                                                                                                                                                                                                                                                                                                       |
| chr15 | 40586543 | 40683724  | M6      | PLCB2-AS1, LINC00984, RNA5SP392, LINC00594, PLCB2, C15orf52, PHGR1, DISP2, KNS1RN                                                                                                                                                                                                                                                                                                                                                                                                                                                                                                                                                                                                                                                                                                                                                                                                                                                                                                                                                                                                                                                                                                                                                                                                                                                                                                                                                                                                                                                                                                                                                                                                                                                                                                                                                                                                                                                                                                                                                                                                                                                                                                                                                                                                                                                                                                                                                                                                                                                                                                                                                                                                                                                                                                                                                                                                                                                                                                                                                                                                                                                                                                                                                                                                                                                                                                                                                                                                                                                                                                                                                                                                                                                                                                                                                                                                                                                                                                                                                                                                                                                                                                                                                                                                                                                              |
| chr15 | 48010877 | 48426454  | M14     | SEMA6D, SLC24A5                                                                                                                                                                                                                                                                                                                                                                                                                                                                                                                                                                                                                                                                                                                                                                                                                                                                                                                                                                                                                                                                                                                                                                                                                                                                                                                                                                                                                                                                                                                                                                                                                                                                                                                                                                                                                                                                                                                                                                                                                                                                                                                                                                                                                                                                                                                                                                                                                                                                                                                                                                                                                                                                                                                                                                                                                                                                                                                                                                                                                                                                                                                                                                                                                                                                                                                                                                                                                                                                                                                                                                                                                                                                                                                                                                                                                                                                                                                                                                                                                                                                                                                                                                                                                                                                                                                                |
| chr15 | 48426454 | 50264882  | M14,M16 | SECISBP2L, COPS2, GALK2, FAM227B, FGF7, DTWD1, ATP8B4, KRT8P24, RN7SL577P, NDUFAF4P1, MIR4716, RN7SL307P, SLC24A5, MYEF2, CTXN2, SLC12A1, DUT, FBN1, CEP152, SHC4, EID1                                                                                                                                                                                                                                                                                                                                                                                                                                                                                                                                                                                                                                                                                                                                                                                                                                                                                                                                                                                                                                                                                                                                                                                                                                                                                                                                                                                                                                                                                                                                                                                                                                                                                                                                                                                                                                                                                                                                                                                                                                                                                                                                                                                                                                                                                                                                                                                                                                                                                                                                                                                                                                                                                                                                                                                                                                                                                                                                                                                                                                                                                                                                                                                                                                                                                                                                                                                                                                                                                                                                                                                                                                                                                                                                                                                                                                                                                                                                                                                                                                                                                                                                                                        |
| chr15 | 50264882 | 50303114  | M16     | ATP8B4, RNA5SP394                                                                                                                                                                                                                                                                                                                                                                                                                                                                                                                                                                                                                                                                                                                                                                                                                                                                                                                                                                                                                                                                                                                                                                                                                                                                                                                                                                                                                                                                                                                                                                                                                                                                                                                                                                                                                                                                                                                                                                                                                                                                                                                                                                                                                                                                                                                                                                                                                                                                                                                                                                                                                                                                                                                                                                                                                                                                                                                                                                                                                                                                                                                                                                                                                                                                                                                                                                                                                                                                                                                                                                                                                                                                                                                                                                                                                                                                                                                                                                                                                                                                                                                                                                                                                                                                                                                              |
| chr15 | 52903771 | 64050568  | M2      | TPM1, LACTB, RPS27L, RAB8B, APH1B, CA12, USP3, FBXL22, RPSAP55, EEF1A1P22, RNU2-53P, HERC1, RNU6-449P, HNRNPA1P74, DYX1C1-CCPG1, MIR628, CNOT6L1P1, RN7SL568P, CD24P2, RNU6-1287P, HNRNPA3P11, LINC00926, RNU6-844P, RN7SKP95, ZNF444P1, MIR2116, RNU4-80P, RNU6-212P, RNA5SP396, PIGHP1, RPS3AP6, MNAT1P5, MESTP2, CYCS3P8, RNA5SP397, RN7SL613P, NPM1P47, HMG1P26, MIR190A, USP3-AS1, FAM214A, ONECUT1, WDR72, UNC13C, RSL24D1, RA827A, PIGB, CCGP1, C15orf65, DYX1C1, PYGO1, PRTG, NEDD4, RFX7, TEX9, MNS1, ZNF280D, TCF12, CGNL1, GCOM1, MYZAP, POLR2M, ALDH1A2, AQP9, LIPC, ADAM10, FAM63B, RNF111, SLTM, CCNB2, MYO1E, LDHAL6B, FAM81A, GCNT3, GTF2A2, BNIP2, FOXB1, ANXA2, NARG2, RORA, VPS13C, C2CD4A, C2CD4B, TNL2                                                                                                                                                                                                                                                                                                                                                                                                                                                                                                                                                                                                                                                                                                                                                                                                                                                                                                                                                                                                                                                                                                                                                                                                                                                                                                                                                                                                                                                                                                                                                                                                                                                                                                                                                                                                                                                                                                                                                                                                                                                                                                                                                                                                                                                                                                                                                                                                                                                                                                                                                                                                                                                                                                                                                                                                                                                                                                                                                                                                                                                                                                                                                                                                                                                                                                                                                                                                                                                                                                                                                                                                                    |
| chr15 | 65345674 | 102516807 | M2      | CRTC3, MIR1827, RPL18P11, RPL21P116, RNU6-415P, MIR184, HNRNPC3, BLM, RNU6-667P, LINC00927, MIR5572, RNU6-380P, MIR549, MIR4514, ANP32BP3, RNU1-77P, ADAMTS7P1, FURIN, UBE2Q2P2, UBE2Q2P6, CSPG4P8, FES, RN7SL61P, GOLGA6L17P, DNMI1P38, ADAMTS7P2, RN7SL256P, CSPG4P9, UBE2Q2P3, RPL9P8, CSPG4P10, MAN2A2, RN7SL410P, GOLGA6L21P, DNMI1P42, SCARNA15, MIR4515, RNU6-401P, TUBA8P2, RNU6-1339P, EFTUD1P1, CSPG4P11, GOLGA2P7, RN7SL331P, UBE2Q2P8, RN7SL417P, DNMI1P51, CSPG4P5, UBE2Q2P11, UBE2Q2P12, GOLGA6L5P, UBE2Q2P1, UNC45A, LINC00933, SCAND2P, EGLN1P1, RNU6-339P, RNU6-796P, NIFKP8, CSPG4P12, RN7SL428P, GOLGA6L3, ADAMTS7P4, RNU7-79P, RNU6-1280P, MIR1276, RNU6-231P, MIR548AP, RNA5SP400, AGBL1-AS1, HDDC3, RNU6-185P, LINC00052, MED28P6, NTRK3-AS1, RCDD1, MIR1179, MIR7-2, KRT18P47, RNU7-195P, HMGB1P8, PRC1, LINC00925, MIR9-3, LINC00928, RPL36AP43, RNU6-132P, MRPL15P1, MIR5009, MIR5009, RNU6-1111P, RNU7-111P, MIR3174, RN7SL755P, RN7SL346P, VPS33B, RPS12P26, RN7SL736P, NDUF43P4, HSPE1P3, RNU6-686P, RN7SL363P, RNU5A-1, RNU5B-1, RNU6-19P, PRC1-AS1, MIR4511, HNRNPA1P44, RNU6-265P, MIR4311, SCARNA14, RPL9P25, ATP5J2P6, RPL35AP32, MIR4512, SNORD18C, SNORD18B, SNORD18A, DUXAP6, NPM1P5, ENO1P2, HMG2N2P47, RPS24P16, IQCH-AS1, HNRNPA1P5, RNU6-1, LINC00930, HMG1P38, ASB9P1, RN7SL599P, HMG2N2P40, MIR3175, SV2B, MIR4312, LINC00277, RN7SL438P, SLC30A1, ST8IA2, LINC00924, RNU2-3P, NR2F2-AS1, MIR1469, PGAM1P12, C15orf32, RN7SKP254, FAM149B1P1, SPATA8-AS1, RN7SKP181, FAM174B, RN7SL677P, RNA5SP401, RNU6-134P, RNU6-1186P, CHD2, MIR4714, HSP90B2P, HNRNPA1P62, RPL7P5, DNMI1P46, RN7SL484P, RNA5SP402, SPATA41, RNU6-322P, PRKXP1, RNU6-181P, RNU6-807P, DNMI1P47, RGMA, RN7SL209P, OR4F14P, OR4F13P, OR4F28P, SLC51B, RNA5SP398, WBP11P5, RASL12, OR4G2P, FAM138E, MIR1302-11, MIR1302-10, MIR1302-2, KBTBD13, UBAP1L, LINC00593, WASH3P, MIR629, RNU6-745P, RPL29P30, KRT8P9, RPL36P, MCTP2, PDOD7, NR2E3, RNA5SP399, RNU2-65P, HEXA-AS1, MIR630, RN7SL485P, RN7SL853P, ADPGK-AS1, NPM1P42, FKBP1A2P, DDX11L9, NPM1P43, MRPS15P1, LOXL1-AS1, DNMI1P33, RN7SL429P, UBL7-AS1, MIR4513, RPL36AP45, NIFKP4, CLPX, RN7SL489P, RN7SL327P, DNMI1P34, ANP32BP1, MIR631, RPL13P4, DNMI1P35, MIR4313, CILP, RN7SL319P, DNMI1P49, RN7SL510P, TYRO3P, MIR3713, RN7SKP217, PARP16, RN7SL278P, KRT8P23, CSPG4P13, IGDCC3, IGDCC4, RN7SL214P, NR2F2, ADAMTS7P3, DPP8, SPATA8, LINC00923, ARRDCA, FAM169B, IGF1R, PGPEP1L, SYNM, PTPAD1, TTC23, LRRC28, VWA9, MEF2A, SLC24A1, DENND4A, RAB11A, MEGF11, LYSDM4, ADAMTS17, CERS3, LINS, DIS3L, ASB7, ALDH1A3, TIPIN, MAP2K1, SNAPC5, RPL4, LRRK1, CHSY1, VIMP, SNRNP1, PCSK6, ZWILCH, LCTL, SMAD6, SMAD3, TM2D3, AAGAB, TARSL2, IQCH, OR4F6, OR4F15, OR4F4, C15orf61, MAP2K5, SKOR1, PIAS1, CALML4, CLN6, FEM1B, ITGA11, CORO2B, ANP32A, SPESP1, NOX5, GLCE, PAQR5, KIF23, RPLP1, TLE3, UACA, LARP6, LRRC49, THAP10, THSD4, CT62, MYO9A, SENP8, GRAMD2, PKM, PARP6, CELF6, HEXA, TMEM202, ARIH1, GOLGA6B, HIGD2B, BBS4, ADPGK, NEO1, HCN4, C15orf60, NPTN, CD276, C15orf59, TBC1D21, LOXL1, STOML1, PML, GOLGA6A, ISLR2, ISLR, STRA6, CCDC33, CYP11A1, SEMA7A, UBL7, ARID3B, CLK3, EDC3, CYP1A1, CYP1A2, CSK, LMAN1L, CPLX3, ULK3, SCAMP2, MPI, FAM219B, COX5A, RPP25, SCAMP5, PPDC, C15orf39, GOLGA6G, GOLGA6D, CCMMD4, NEIL1, MAN2C1, SIN3A, PTPN9, SNU1P, IMP3, SNX33, CSPG4, ODF3L1, UBE2Q2, FBXO22, RMC4, C15orf27, ETFA, ISL2, SCAPER, RCN2, PSTPIP1, TSPAN3, PEAK1, HMG20A, LINGO1, TBC1D2B, SH2D7, CIB2, IDH3A, ACSBG1, DNAJA4, WDR61, CRABP1, IREB2, HYKK, PSMA4, CHRNA5, CHRNA3, CHRNB4, ADAMTS7, MORF4L1, CTSH, RASGRF1, ANKRD34C, TMED3, KIAA1024, MTHFS, ST20-MTHFS, ST20, C15orf37, BCL2A1, ZFAND6, FAH, ARNT2, ABHD17C, KIAA1199, MESDC2, MESDC1, C15orf26, IL16, STARO5, TMC3, MEX3B, EFTUD1, FAM154B, GOLGA6L10, GOLGA6L9, RPS17, GOLGA6L18, GOLGA6L19, GOLGA6L20, RPS17L, CPEB1, AP3B2, FSD2, WHAMM, HOMER2, FAM103A1, C15orf40, BTBD1, M16SF1, BNC1, SH3GL3, ADAMTS13, UBE2Q2L, GOLGA6L4, ZSCAN2, WDR73, NMB, SEC11A, ZNF592, ALPK3, SLC28A1, PDE8A, AKAP13, KLHL25, AGBL1, NTRK3, MRPL46, MRPS11, DET1, AEN, ISG20, ACAN, HAPLN3, MFGEB, ABHD2, RLBP1, FANCI, POLG, RHCG, TICRR, KIF7, PLIN1, PEX11A, WDR93, MESP1, MESP2, ANPEP, AP3S2, C15orf38-AP3S2, C15orf38, ZNF710, JDH2, SEMA48, CIB1, M16GGP1, TLL1L3, NGRN, GABARAPL3, ZNF774, IQGAP1 |
| chr16 | 1813720  | 2053672   | M6      | RN7SL367P, SNORA10, SNORA64, SNHG9, MAPK8IP3, NME3, MRPS34, EME2, SPSB3, NUBP2, IGFALS, HAGH, FAHD1, MEOIB, HS3ST6, MSRB1, RPL3L, NDUFB10, RPS2, RNF151, TBL3, NOXO1, GFER, SYNGR3, ZNF598                                                                                                                                                                                                                                                                                                                                                                                                                                                                                                                                                                                                                                                                                                                                                                                                                                                                                                                                                                                                                                                                                                                                                                                                                                                                                                                                                                                                                                                                                                                                                                                                                                                                                                                                                                                                                                                                                                                                                                                                                                                                                                                                                                                                                                                                                                                                                                                                                                                                                                                                                                                                                                                                                                                                                                                                                                                                                                                                                                                                                                                                                                                                                                                                                                                                                                                                                                                                                                                                                                                                                                                                                                                                                                                                                                                                                                                                                                                                                                                                                                                                                                                                                     |
| chr16 | 2201728  | 2283543   | M6      | SNORD60, RAB26, TRAF7, CASKIN1, MLST8, BRICD5, PGP, E4F1                                                                                                                                                                                                                                                                                                                                                                                                                                                                                                                                                                                                                                                                                                                                                                                                                                                                                                                                                                                                                                                                                                                                                                                                                                                                                                                                                                                                                                                                                                                                                                                                                                                                                                                                                                                                                                                                                                                                                                                                                                                                                                                                                                                                                                                                                                                                                                                                                                                                                                                                                                                                                                                                                                                                                                                                                                                                                                                                                                                                                                                                                                                                                                                                                                                                                                                                                                                                                                                                                                                                                                                                                                                                                                                                                                                                                                                                                                                                                                                                                                                                                                                                                                                                                                                                                       |
| chr16 | 20410420 | 20749278  | M16     | PDILT, ACSM5, ACSM2A, ACSM2B, ACSM3, ACSM1, THUMPD1                                                                                                                                                                                                                                                                                                                                                                                                                                                                                                                                                                                                                                                                                                                                                                                                                                                                                                                                                                                                                                                                                                                                                                                                                                                                                                                                                                                                                                                                                                                                                                                                                                                                                                                                                                                                                                                                                                                                                                                                                                                                                                                                                                                                                                                                                                                                                                                                                                                                                                                                                                                                                                                                                                                                                                                                                                                                                                                                                                                                                                                                                                                                                                                                                                                                                                                                                                                                                                                                                                                                                                                                                                                                                                                                                                                                                                                                                                                                                                                                                                                                                                                                                                                                                                                                                            |
| chr16 | 29789593 | 29828571  | M6      | ZG16, KIF22, MAZ, PRRT2, PAGR1                                                                                                                                                                                                                                                                                                                                                                                                                                                                                                                                                                                                                                                                                                                                                                                                                                                                                                                                                                                                                                                                                                                                                                                                                                                                                                                                                                                                                                                                                                                                                                                                                                                                                                                                                                                                                                                                                                                                                                                                                                                                                                                                                                                                                                                                                                                                                                                                                                                                                                                                                                                                                                                                                                                                                                                                                                                                                                                                                                                                                                                                                                                                                                                                                                                                                                                                                                                                                                                                                                                                                                                                                                                                                                                                                                                                                                                                                                                                                                                                                                                                                                                                                                                                                                                                                                                 |
| chr16 | 29979460 | 30409682  | M6      | TMEM219, TAOK2, HIRIP3, INO80E, DOC2A, C16orf92, FAM57B, ALDOA, SLX1A-SULT1A3, PPP4C, TBX6, YPEL3, GDPD3, MAPK3, CORO1A, BOLA2B, SLX1A, SULT1A3, CD2BP2, TBC1D10B, MYLPF, ZNF48, SEPT1                                                                                                                                                                                                                                                                                                                                                                                                                                                                                                                                                                                                                                                                                                                                                                                                                                                                                                                                                                                                                                                                                                                                                                                                                                                                                                                                                                                                                                                                                                                                                                                                                                                                                                                                                                                                                                                                                                                                                                                                                                                                                                                                                                                                                                                                                                                                                                                                                                                                                                                                                                                                                                                                                                                                                                                                                                                                                                                                                                                                                                                                                                                                                                                                                                                                                                                                                                                                                                                                                                                                                                                                                                                                                                                                                                                                                                                                                                                                                                                                                                                                                                                                                         |
| chr16 | 76311175 | 80838175  | M16     | RN7SKP233, MIR4719, VN2R10P, KRT8P22, LSM3P5, RPS3P7, RNA5SP431, CNTNAP4, MON1B, SYCE1L, ADAMTS18, NUDT7, VAT1L, CLEC3A, WWOX, MAF, DYNLRB2, CDYL2                                                                                                                                                                                                                                                                                                                                                                                                                                                                                                                                                                                                                                                                                                                                                                                                                                                                                                                                                                                                                                                                                                                                                                                                                                                                                                                                                                                                                                                                                                                                                                                                                                                                                                                                                                                                                                                                                                                                                                                                                                                                                                                                                                                                                                                                                                                                                                                                                                                                                                                                                                                                                                                                                                                                                                                                                                                                                                                                                                                                                                                                                                                                                                                                                                                                                                                                                                                                                                                                                                                                                                                                                                                                                                                                                                                                                                                                                                                                                                                                                                                                                                                                                                                             |
| chr17 | 1933477  | 2076052   | M6      | MIR132, MIR212, DPH1, OVCA2, HIC1, SMG6                                                                                                                                                                                                                                                                                                                                                                                                                                                                                                                                                                                                                                                                                                                                                                                                                                                                                                                                                                                                                                                                                                                                                                                                                                                                                                                                                                                                                                                                                                                                                                                                                                                                                                                                                                                                                                                                                                                                                                                                                                                                                                                                                                                                                                                                                                                                                                                                                                                                                                                                                                                                                                                                                                                                                                                                                                                                                                                                                                                                                                                                                                                                                                                                                                                                                                                                                                                                                                                                                                                                                                                                                                                                                                                                                                                                                                                                                                                                                                                                                                                                                                                                                                                                                                                                                                        |
| chr17 | 2276310  | 2324111   | M6      | SGSM2, MNT, METTL16                                                                                                                                                                                                                                                                                                                                                                                                                                                                                                                                                                                                                                                                                                                                                                                                                                                                                                                                                                                                                                                                                                                                                                                                                                                                                                                                                                                                                                                                                                                                                                                                                                                                                                                                                                                                                                                                                                                                                                                                                                                                                                                                                                                                                                                                                                                                                                                                                                                                                                                                                                                                                                                                                                                                                                                                                                                                                                                                                                                                                                                                                                                                                                                                                                                                                                                                                                                                                                                                                                                                                                                                                                                                                                                                                                                                                                                                                                                                                                                                                                                                                                                                                                                                                                                                                                                            |
| chr17 | 4613913  | 4641743   | M6      | ARRB2, MED11, CXCL16                                                                                                                                                                                                                                                                                                                                                                                                                                                                                                                                                                                                                                                                                                                                                                                                                                                                                                                                                                                                                                                                                                                                                                                                                                                                                                                                                                                                                                                                                                                                                                                                                                                                                                                                                                                                                                                                                                                                                                                                                                                                                                                                                                                                                                                                                                                                                                                                                                                                                                                                                                                                                                                                                                                                                                                                                                                                                                                                                                                                                                                                                                                                                                                                                                                                                                                                                                                                                                                                                                                                                                                                                                                                                                                                                                                                                                                                                                                                                                                                                                                                                                                                                                                                                                                                                                                           |
| chr17 | 4796317  | 4899226   | M6      | MINK1, CHRNE, C17orf107, GP1BA, SLC25A11, RNF167, PFN1, ENO3, SPAG7, CAMTA2                                                                                                                                                                                                                                                                                                                                                                                                                                                                                                                                                                                                                                                                                                                                                                                                                                                                                                                                                                                                                                                                                                                                                                                                                                                                                                                                                                                                                                                                                                                                                                                                                                                                                                                                                                                                                                                                                                                                                                                                                                                                                                                                                                                                                                                                                                                                                                                                                                                                                                                                                                                                                                                                                                                                                                                                                                                                                                                                                                                                                                                                                                                                                                                                                                                                                                                                                                                                                                                                                                                                                                                                                                                                                                                                                                                                                                                                                                                                                                                                                                                                                                                                                                                                                                                                    |
| chr17 | 6909261  | 6946320   | M6      | ALOX12, RNASEK, RNASEK-C17orf49, C17orf49, BCL6B, SLC16A13, SLC16A11, MIR497HG                                                                                                                                                                                                                                                                                                                                                                                                                                                                                                                                                                                                                                                                                                                                                                                                                                                                                                                                                                                                                                                                                                                                                                                                                                                                                                                                                                                                                                                                                                                                                                                                                                                                                                                                                                                                                                                                                                                                                                                                                                                                                                                                                                                                                                                                                                                                                                                                                                                                                                                                                                                                                                                                                                                                                                                                                                                                                                                                                                                                                                                                                                                                                                                                                                                                                                                                                                                                                                                                                                                                                                                                                                                                                                                                                                                                                                                                                                                                                                                                                                                                                                                                                                                                                                                                 |
| chr17 | 7096349  | 7232493   | M6      | DLG4, ACADVL, DVL2, PHF23, GABARAP, CTODNEP1, ELP5, CLDN7, MIR324, SLC2A4, YBX2, EIF5A, GPS2, NEURL4                                                                                                                                                                                                                                                                                                                                                                                                                                                                                                                                                                                                                                                                                                                                                                                                                                                                                                                                                                                                                                                                                                                                                                                                                                                                                                                                                                                                                                                                                                                                                                                                                                                                                                                                                                                                                                                                                                                                                                                                                                                                                                                                                                                                                                                                                                                                                                                                                                                                                                                                                                                                                                                                                                                                                                                                                                                                                                                                                                                                                                                                                                                                                                                                                                                                                                                                                                                                                                                                                                                                                                                                                                                                                                                                                                                                                                                                                                                                                                                                                                                                                                                                                                                                                                           |
| chr17 | 7460810  | 7496111   | M6      | SENP3-EIF4A1, SNORA67, SNORA48, SNORD10, TNFSF12, TNFSF12-TNFSF13, TNFSF13, SENP3, EIF4A1, CD68, MPDU1, SOX15, FXR2                                                                                                                                                                                                                                                                                                                                                                                                                                                                                                                                                                                                                                                                                                                                                                                                                                                                                                                                                                                                                                                                                                                                                                                                                                                                                                                                                                                                                                                                                                                                                                                                                                                                                                                                                                                                                                                                                                                                                                                                                                                                                                                                                                                                                                                                                                                                                                                                                                                                                                                                                                                                                                                                                                                                                                                                                                                                                                                                                                                                                                                                                                                                                                                                                                                                                                                                                                                                                                                                                                                                                                                                                                                                                                                                                                                                                                                                                                                                                                                                                                                                                                                                                                                                                            |
| chr17 | 7727949  | 7764148   | M6      | DNAH2, KDM6B, TMEM88, LSM1, CYB5D1                                                                                                                                                                                                                                                                                                                                                                                                                                                                                                                                                                                                                                                                                                                                                                                                                                                                                                                                                                                                                                                                                                                                                                                                                                                                                                                                                                                                                                                                                                                                                                                                                                                                                                                                                                                                                                                                                                                                                                                                                                                                                                                                                                                                                                                                                                                                                                                                                                                                                                                                                                                                                                                                                                                                                                                                                                                                                                                                                                                                                                                                                                                                                                                                                                                                                                                                                                                                                                                                                                                                                                                                                                                                                                                                                                                                                                                                                                                                                                                                                                                                                                                                                                                                                                                                                                             |
| chr17 | 8026396  | 8159175   | M6      | HEST7, PER1, VAMP2, TMEM107, C17orf59, AURKB, CTC1, PFAS, SNORD118, LINC00324                                                                                                                                                                                                                                                                                                                                                                                                                                                                                                                                                                                                                                                                                                                                                                                                                                                                                                                                                                                                                                                                                                                                                                                                                                                                                                                                                                                                                                                                                                                                                                                                                                                                                                                                                                                                                                                                                                                                                                                                                                                                                                                                                                                                                                                                                                                                                                                                                                                                                                                                                                                                                                                                                                                                                                                                                                                                                                                                                                                                                                                                                                                                                                                                                                                                                                                                                                                                                                                                                                                                                                                                                                                                                                                                                                                                                                                                                                                                                                                                                                                                                                                                                                                                                                                                  |
| chr17 | 10297565 | 10443383  | M11     | MYH8, MYH4, MYH1, MYH2                                                                                                                                                                                                                                                                                                                                                                                                                                                                                                                                                                                                                                                                                                                                                                                                                                                                                                                                                                                                                                                                                                                                                                                                                                                                                                                                                                                                                                                                                                                                                                                                                                                                                                                                                                                                                                                                                                                                                                                                                                                                                                                                                                                                                                                                                                                                                                                                                                                                                                                                                                                                                                                                                                                                                                                                                                                                                                                                                                                                                                                                                                                                                                                                                                                                                                                                                                                                                                                                                                                                                                                                                                                                                                                                                                                                                                                                                                                                                                                                                                                                                                                                                                                                                                                                                                                         |
| chr17 | 29496908 | 29687721  | M16     | AK4P1, NF1, OMG, EVI2B, EVI2A                                                                                                                                                                                                                                                                                                                                                                                                                                                                                                                                                                                                                                                                                                                                                                                                                                                                                                                                                                                                                                                                                                                                                                                                                                                                                                                                                                                                                                                                                                                                                                                                                                                                                                                                                                                                                                                                                                                                                                                                                                                                                                                                                                                                                                                                                                                                                                                                                                                                                                                                                                                                                                                                                                                                                                                                                                                                                                                                                                                                                                                                                                                                                                                                                                                                                                                                                                                                                                                                                                                                                                                                                                                                                                                                                                                                                                                                                                                                                                                                                                                                                                                                                                                                                                                                                                                  |
| chr17 | 38209591 | 38278901  | M6      | MED24, THRA, NR1D1, MSL1                                                                                                                                                                                                                                                                                                                                                                                                                                                                                                                                                                                                                                                                                                                                                                                                                                                                                                                                                                                                                                                                                                                                                                                                                                                                                                                                                                                                                                                                                                                                                                                                                                                                                                                                                                                                                                                                                                                                                                                                                                                                                                                                                                                                                                                                                                                                                                                                                                                                                                                                                                                                                                                                                                                                                                                                                                                                                                                                                                                                                                                                                                                                                                                                                                                                                                                                                                                                                                                                                                                                                                                                                                                                                                                                                                                                                                                                                                                                                                                                                                                                                                                                                                                                                                                                                                                       |

|       |          |          |                       |                                                                                                                                                                                                                                                                                                                                                                                                                                                                                                                                                                                                                                                                                                                                                                                                                                                                                                                                                                                                                                                                                                                                                                                                                                                                                                                                                                                                                                                                                                                                                                                                                                                                                                                                                                                                                                                                                                                                                                                                                                                                                                                                                                                                                                                                                                                                                                                                                                                                                                                                                                                                                                                                                                                                                                                                                                                                                                                                                                                                                                                                         |
|-------|----------|----------|-----------------------|-------------------------------------------------------------------------------------------------------------------------------------------------------------------------------------------------------------------------------------------------------------------------------------------------------------------------------------------------------------------------------------------------------------------------------------------------------------------------------------------------------------------------------------------------------------------------------------------------------------------------------------------------------------------------------------------------------------------------------------------------------------------------------------------------------------------------------------------------------------------------------------------------------------------------------------------------------------------------------------------------------------------------------------------------------------------------------------------------------------------------------------------------------------------------------------------------------------------------------------------------------------------------------------------------------------------------------------------------------------------------------------------------------------------------------------------------------------------------------------------------------------------------------------------------------------------------------------------------------------------------------------------------------------------------------------------------------------------------------------------------------------------------------------------------------------------------------------------------------------------------------------------------------------------------------------------------------------------------------------------------------------------------------------------------------------------------------------------------------------------------------------------------------------------------------------------------------------------------------------------------------------------------------------------------------------------------------------------------------------------------------------------------------------------------------------------------------------------------------------------------------------------------------------------------------------------------------------------------------------------------------------------------------------------------------------------------------------------------------------------------------------------------------------------------------------------------------------------------------------------------------------------------------------------------------------------------------------------------------------------------------------------------------------------------------------------------|
| chr17 | 40714164 | 40734757 | M6                    | COASY, MLX, PSMC3IP, FAM134C                                                                                                                                                                                                                                                                                                                                                                                                                                                                                                                                                                                                                                                                                                                                                                                                                                                                                                                                                                                                                                                                                                                                                                                                                                                                                                                                                                                                                                                                                                                                                                                                                                                                                                                                                                                                                                                                                                                                                                                                                                                                                                                                                                                                                                                                                                                                                                                                                                                                                                                                                                                                                                                                                                                                                                                                                                                                                                                                                                                                                                            |
| chr17 | 42232263 | 42298178 | M6                    | ASB16-AS1, C17orf53, ASB16, TMUB2, ATXN7L3, UBTf                                                                                                                                                                                                                                                                                                                                                                                                                                                                                                                                                                                                                                                                                                                                                                                                                                                                                                                                                                                                                                                                                                                                                                                                                                                                                                                                                                                                                                                                                                                                                                                                                                                                                                                                                                                                                                                                                                                                                                                                                                                                                                                                                                                                                                                                                                                                                                                                                                                                                                                                                                                                                                                                                                                                                                                                                                                                                                                                                                                                                        |
| chr17 | 49337311 | 49731001 | M14                   | RPL7P48, RN7SL699P, MBTD1, UTP18, CA10                                                                                                                                                                                                                                                                                                                                                                                                                                                                                                                                                                                                                                                                                                                                                                                                                                                                                                                                                                                                                                                                                                                                                                                                                                                                                                                                                                                                                                                                                                                                                                                                                                                                                                                                                                                                                                                                                                                                                                                                                                                                                                                                                                                                                                                                                                                                                                                                                                                                                                                                                                                                                                                                                                                                                                                                                                                                                                                                                                                                                                  |
| chr17 | 49731001 | 53150437 | M14, M16              | RPS2P48, ISCA1P3, ARL2BPP8, RN7SKP14, CA10, C17orf112, KIF2B, TOM1L1, COX11, STXBP4                                                                                                                                                                                                                                                                                                                                                                                                                                                                                                                                                                                                                                                                                                                                                                                                                                                                                                                                                                                                                                                                                                                                                                                                                                                                                                                                                                                                                                                                                                                                                                                                                                                                                                                                                                                                                                                                                                                                                                                                                                                                                                                                                                                                                                                                                                                                                                                                                                                                                                                                                                                                                                                                                                                                                                                                                                                                                                                                                                                     |
| chr17 | 53150437 | 54939556 | M14                   | RNU6-1249P, RPL39P33, STXBP4, HLF, MMD, TMEM100, PCTP, ANKFN1, NOG, C17orf67, DGKE                                                                                                                                                                                                                                                                                                                                                                                                                                                                                                                                                                                                                                                                                                                                                                                                                                                                                                                                                                                                                                                                                                                                                                                                                                                                                                                                                                                                                                                                                                                                                                                                                                                                                                                                                                                                                                                                                                                                                                                                                                                                                                                                                                                                                                                                                                                                                                                                                                                                                                                                                                                                                                                                                                                                                                                                                                                                                                                                                                                      |
| chr17 | 66548052 | 71202346 | M14                   | ABCA5, MAP2K6, KCNJ16, KCNJ2, SOX9, SLC39A11, SS1R2, COG1, FAM20A, ABCA8, ABCA9-AS1, MIR4524B, MIR4524A, SNRPGP4, LINC01028, KCNJ2-AS1, CALM2P1, CASC17, RNU7-155P, RNU6-305P, LINC01152, SOX9-AS1, LINC00511, RPL32P33, RN7SKP180, POLR3KP2, ABCA9, ABCA6, ABCA10                                                                                                                                                                                                                                                                                                                                                                                                                                                                                                                                                                                                                                                                                                                                                                                                                                                                                                                                                                                                                                                                                                                                                                                                                                                                                                                                                                                                                                                                                                                                                                                                                                                                                                                                                                                                                                                                                                                                                                                                                                                                                                                                                                                                                                                                                                                                                                                                                                                                                                                                                                                                                                                                                                                                                                                                      |
| chr17 | 78355346 | 79857117 | M2                    | AATK, MIR4740, MIR3186, AZI1, ENTHD2, C17orf89, SLC38A10, TMEM105, ACTG1, FSCN2, C17orf70, NPLOC4, TSPAN10, PDE6G, OXLD1, CCDC137, ARL16, HGS, MRPL12, SLC25A10, GCGR, FAM195B, PPP1R27, P4HB, MIR4730, RPL32P31, RPL31P7, RPL12P37, BAIAP2-AS1, MIR657, MIR3065, MIR338, MIR1250, AATK-AS1, LINC00482, ARHGDI4, ALYREF, ANAPC11, RNF213, ENDOV, NPTX1, RPTOR, CHMP6, BAIAP2                                                                                                                                                                                                                                                                                                                                                                                                                                                                                                                                                                                                                                                                                                                                                                                                                                                                                                                                                                                                                                                                                                                                                                                                                                                                                                                                                                                                                                                                                                                                                                                                                                                                                                                                                                                                                                                                                                                                                                                                                                                                                                                                                                                                                                                                                                                                                                                                                                                                                                                                                                                                                                                                                            |
| chr17 | 79857117 | 80059742 | M2, M9                | MAFG-AS1, ANAPC11, NPB, PCYT2, SIRT7, MAFG, PYCR1, MYADML2, NOTUM, ASPSCR1, STRA13, LRRC45, RAC3, DCXR, RFNG, GPS1, DUS1L, FASN, CCDC57                                                                                                                                                                                                                                                                                                                                                                                                                                                                                                                                                                                                                                                                                                                                                                                                                                                                                                                                                                                                                                                                                                                                                                                                                                                                                                                                                                                                                                                                                                                                                                                                                                                                                                                                                                                                                                                                                                                                                                                                                                                                                                                                                                                                                                                                                                                                                                                                                                                                                                                                                                                                                                                                                                                                                                                                                                                                                                                                 |
| chr17 | 80059742 | 81188573 | M2                    | NARF-IT1, MIR4525, CCDC57, SLC16A3, CSNK1D, CD7, SECTM1, TEX19, UTS2R, OGFOD3, HEXDC, C17orf62, NARF, FOXK2, WDR45B, RAB40B, FN3KRP, FN3K, TBDC, ZNF750, B3GNTL1, METRNL                                                                                                                                                                                                                                                                                                                                                                                                                                                                                                                                                                                                                                                                                                                                                                                                                                                                                                                                                                                                                                                                                                                                                                                                                                                                                                                                                                                                                                                                                                                                                                                                                                                                                                                                                                                                                                                                                                                                                                                                                                                                                                                                                                                                                                                                                                                                                                                                                                                                                                                                                                                                                                                                                                                                                                                                                                                                                                |
| chr18 | 163380   | 44098841 | M14                   | RN7SL247P, MIR320C2, RAC1P1, WBP2P1, RN7SL97P, RPS24P18, DHFRP1, NPM1P2, FAM60BP, RNU6-1289P, CIAPIN1P, AQP4-AS1, LDLRAD4, UBA52P9, RBM22P1, PA2G4P3, ARIH2P1, RNU6-408P, RNU6-857P, RNU6-167P, RNU6-1002P, RN7SKP44, LRRC37A7P, RNU6-1050P, PGDP1, RNA5SP453, HNRNPA1P7, WBP11P1, FAM210A, RNMT, ZNF271, NRBF2P1, MIR187, MIR3929, MIR4318, RN7SKP182, RNU6-706P, LINC00669, RPL7AP66, MIR5583-1, RNU6-1242P, RPL17P45, RNU7-145P, LINC00907, MC5R, MC2R, RNA5SP454, RNU6-443P, RNA5SP455, KRTP8P5, MIR4319, ZNF519, RN7SKP26, RNU6-1278P, POTE, ANKRD30B, ROCK1, GREB1L, ESCO1, SNRPD1, ABHD3, MIB1, GATA6, CTAGE1, RBBP8, CABLES1, TMEM241, R1OK3, C18orf8, NPC1, ANKRD29, LAMA3, TTC39C, CABYR, OSBP1A, IMPACT, HRH4, ZNF521, SS18, PSMA8, TAF4B, KCTD1, AQP4, CHST9, CDH2, DSC3, DSC2, DSC1, DSG1, DSG4, DSG3, DSG2, TTR, B4GALT6, SLC25A52, TRAPPC8, RNF125, RNF138, GAREM, MEP1B, KLHL14, CCDC178, ASXL3, NOLA, DTNA, MAPRE2, ZNF397, ZSCAN30, ZNF24, ZNF396, INO80C, GALNT1, C18orf21, RPRD1A, SLC39A6, ELP2, MOCOS, FHOD3, USP14, TPGS2, THOC1, COLEC12, KIAA1328, CETN1, CLUL1, C18orf56, CELF4, TYMS, ENOSF1, PIK3C3, RIT2, SYT4, YES1, ADCYAP1, METTL4, SETBP1, SLC14A2, NDC80, SLC14A1, SMCHD1, SIGLEC15, EPG5, EMILIN2, LPIN2, PSTPIP2, MYOM1, ATP5A1, HAUS1, MYL12A, MYL12B, TGIF1, C18orf25, RNF165, LOXHD1, DLGAP1, C18orf42, ZBTB14, EPB41L3, TMEM200C, L3MBTL4, C18orf64, ARHGAP28, LAMA1, LRRC30, PTPRM, RAB12, SOGA2, NDUFV2, ANKRD12, TWSG1, RALBP1, PPP4R1, RAB31, RN7SKP146, RNU1-109P, TXNDC2, COX6CP3, LINC00470, RN7SKP72, VAPA, KATNBL1P3, RNU6-340P, CBX3P2, RNU7-25P, RPL31P59, IGLJCOR18, RPL21P127, RN7SL39P, DLGAP1-AS1, DLGAP1-AS2, DLGAP1-AS3, RNU6-831P, DLGAP1-AS4, GAPDHP66, DLGAP1-AS5, APCDD1, NAPG, PPIAP14, LINC00526, LINC00667, MIR3976, RNU5F-3P, RN7SL723P, RNU6-349P, RPL6P27, RN7SL282P, LINC00668, SCML2P1, RNU6-916P, RN7SL537P, SLC25A51P2, PIEZO2, RFWD2P1, RN7SL50P, THEMIS3P, AKR1B1P6, RPS4XP19, RNU2-27P, RNU6-903P, KRT18P8, RN7SL862P, RNA5SP449, PIGP4, RNA5SP450, CCDC58P1, PMM2P1, GNAL, NP1B1P, CHMP1B, RNU6-324P, MPPE1, CCDC58P3, RNU6-170P, RNU7-129P, LDLRAD4-AS1, MIR5190, MIR4526, RN7SL362P, NF1P5, ANKRD20A5P, RNU6-316P, RHO1P1, CYP4F35P, TERF1P2, FEM1AP2, LONRF2P1, CXADR3P, GRAMD4P7, RNU6-1021P, OR4K7P, OR4K8P, SNX19P3, RNU6-1210P, MIR3156-2, FGF7P1, RN7SL662P, BNIP3P3, RNU6-721P, RNU6-120P, EXOGP1, MIR320C1, RN7SL233P, MIR133A1, MIR1-2, RNU6-1038P, RNA5SP451, RNU6ATAC20P, GATA6-AS1, RNU6-702P, RPS4XP18, RNU6-1032P, UBE2CP2, MIR4741, RN7SL745P, RPS10P27, RPL23AP77, RNU5A-8P, RNA5SP452, RNU6-435P, IMPA2, ANKRD62, CIDEA, TUBB6, AFG3L2, SLM1, SPIRE1, PSMG2, CEP76, PTPN2, SEH1L, CEP192, ST8SIA5, PIAS2, KATNAL2, TCEB3CL2, TCEB3CL, RNU6-1131P, MIR4527, TCEB3C, TPMT1P, TCEB3B, RNU6-708P, RNU7-191P, RNA5SP456, MIR4743, HDHD2, MIR4744, MIR1539, SNORD58C, SNORD58A, SNORD58B, SRP72P1, SMUG1P1, IER3IP1, SCARNA17, RNA5SP457, ADAD1P2, RN7SL310P, SKOR2, SMAD2, ZBTB7C, CTIF, SMAD7, DYM, C18orf32, RPL17-C18orf32, RPL17, LIPG, ACAA2, MYO56, CCDC11, MBD1, LOXHD1 |
| chr18 | 44098841 | 47799259 | M14, M2               | RNA5SP458, MBD1, CXCK1, SKA1                                                                                                                                                                                                                                                                                                                                                                                                                                                                                                                                                                                                                                                                                                                                                                                                                                                                                                                                                                                                                                                                                                                                                                                                                                                                                                                                                                                                                                                                                                                                                                                                                                                                                                                                                                                                                                                                                                                                                                                                                                                                                                                                                                                                                                                                                                                                                                                                                                                                                                                                                                                                                                                                                                                                                                                                                                                                                                                                                                                                                                            |
| chr18 | 47799259 | 47906557 | M14, M2, M6           | RPLP0P11, HNRNPA3P16, RPL17P46, RN7SL695P, SRSF10P1, RNU1-46P, SS18L2P2, RSL24D19P, RPS8P3, RPL29P32, SNORA37, SNRPGP2, RPSAP57, MAP1LC3P, RNA5SP459, MIR4529, RPL21P126, WDR7-OT1, LINC-ROR, RNU6-737P, RNU6-742P, RSL24D1P11, HMG1P30, MIR122, RPL9P31, MRPL37P1, RN7SL112P, RNU6-219P, RNU2-69P, OACYLP, RPS26P54, GLUD1P4, NFE2L3P1, RN7SL342P, SDCCAG3P1, FAM60CP, RNU6-567P, RPS3AP49, RNU4-17P, MRPS5P4, CTBP2P3, RNU6-116P, RPL30P14, RPIAP1, RPL17P44, ACTBP9, RN7SL705P, RNU6-142P, ATP5G1P6, RPL12P39, LINC00305, RNU7-146P, PRPF19P1, RNU6-1037P, MIR5011, RPL31P9, AKR1B10P2, RNU6-39P, SDHCP1, RPS2P6, RN7SL795P, HNRNPA1P11, RNA5SP460, MIR548AV, RN7SL401P, RN7SL551P, FAUP1, LINC00909, LINC00683, ARL2BPP1, RNU6-346P, RPL26P35, BDP1P, RNA5SP461, LINC01029, RNU6-655P, RBFADN, SLC25A6P4, SKA1, MAPK4, MRO, ME2, ELAC1, SMAD4, MEX3C, DCC, MBD2, POLI, STARD6, C18orf54, DYNAP, RAB27B, CCDC68, TCF4, TXNL1, WDR7, BOD1L2, ST8SIA3, ONECUT2, FECH, NARS, ATP8B1, NEDD4L, ALPK2, MALT1, ZNF532, SEC11C, GRP, RAX, CPLX4, LMAN1, CCBE1, PMAIP1, MC4R, CDH20, RNF152, PIGN, KIAA1468, TNFRSF11A, ZCCHC2, PHLPP1, BCL2, KDSR, VPS4B, SERPINB5, SERPINB12, SERPINB13, SERPINB4, SERPINB11, SERPINB3, SERPINB7, SERPINB2, SERPINB10, HMSD, SERPINB8, CDH7, CDH19, DSEL, TMX3, CCDC102B, DOK6, CD226, RTTN, SOCS6, GTSOCR1, CBLN2, NETO1, FBOX15, TIMM21, CYB5A, C18orf63, FAM69C, CNDP2, CNDP1, ZNF407, ZADH2, TSHZ1, SMIM21, ZNF516, LINC00908, ZNF236, MBP, GALR1, SALL3, ATP9B, NFATC1, CTDP1, KCNG2, PQLC1, HSBP1L1, TXNL4A, RBFA, ADNP2, PARDEG                                                                                                                                                                                                                                                                                                                                                                                                                                                                                                                                                                                                                                                                                                                                                                                                                                                                                                                                                                                                                                                                                                                                                                                                                                                                                                                                                                                                                                                                                                      |
| chr18 | 47906557 | 77960703 | M14, M2               | PARDEG                                                                                                                                                                                                                                                                                                                                                                                                                                                                                                                                                                                                                                                                                                                                                                                                                                                                                                                                                                                                                                                                                                                                                                                                                                                                                                                                                                                                                                                                                                                                                                                                                                                                                                                                                                                                                                                                                                                                                                                                                                                                                                                                                                                                                                                                                                                                                                                                                                                                                                                                                                                                                                                                                                                                                                                                                                                                                                                                                                                                                                                                  |
| chr18 | 77960703 | 78005337 | M2                    | OR4F8P, C19orf70, HSD11B1L, LONP1, CATSPERD                                                                                                                                                                                                                                                                                                                                                                                                                                                                                                                                                                                                                                                                                                                                                                                                                                                                                                                                                                                                                                                                                                                                                                                                                                                                                                                                                                                                                                                                                                                                                                                                                                                                                                                                                                                                                                                                                                                                                                                                                                                                                                                                                                                                                                                                                                                                                                                                                                                                                                                                                                                                                                                                                                                                                                                                                                                                                                                                                                                                                             |
| chr19 | 110678   | 1031130  | M9                    | MIR3940, RPL7P50, CATSPERD, PRR22, DUS3L, NRTN, FUT6, FUT3, FUT5, NDUFA11, VMAC, CAPS, RANBP3, RFX2, ACSBG2, MLLT1, ACER1, CLPP, ALKBH7, PSPN, GTF2F1, KHSPR, SLC25A41, SLC25A23, CRB3, DENND1C, TUBB4A, TNFSF9, CD70, TNFSF14, C3, GPR108                                                                                                                                                                                                                                                                                                                                                                                                                                                                                                                                                                                                                                                                                                                                                                                                                                                                                                                                                                                                                                                                                                                                                                                                                                                                                                                                                                                                                                                                                                                                                                                                                                                                                                                                                                                                                                                                                                                                                                                                                                                                                                                                                                                                                                                                                                                                                                                                                                                                                                                                                                                                                                                                                                                                                                                                                              |
| chr19 | 1031130  | 1425917  | M6, M9                | GPR108, TRIP10                                                                                                                                                                                                                                                                                                                                                                                                                                                                                                                                                                                                                                                                                                                                                                                                                                                                                                                                                                                                                                                                                                                                                                                                                                                                                                                                                                                                                                                                                                                                                                                                                                                                                                                                                                                                                                                                                                                                                                                                                                                                                                                                                                                                                                                                                                                                                                                                                                                                                                                                                                                                                                                                                                                                                                                                                                                                                                                                                                                                                                                          |
| chr19 | 1425917  | 5679381  | M9                    | PCP2, STXBP2, RETN, C19orf59, TRAPP5, FCER2, CLEC4G, CD209, CLEC4M, EVI5L, LRRC8E, EMR4P, RPL21P129, CLEC4G1P, EXOSC3P2, RNA5SP463, TRIP10, SH2D3A, VAV1, EMR1, MBD3L5, MBD3L4, MBD3L2, MBD3L3, ZNF557, INSR, ARHGFE18, PEX11G, C19orf45, ZNF358, MCOLN1, PNPLA6, CAMSAP3, XAB2, PET100                                                                                                                                                                                                                                                                                                                                                                                                                                                                                                                                                                                                                                                                                                                                                                                                                                                                                                                                                                                                                                                                                                                                                                                                                                                                                                                                                                                                                                                                                                                                                                                                                                                                                                                                                                                                                                                                                                                                                                                                                                                                                                                                                                                                                                                                                                                                                                                                                                                                                                                                                                                                                                                                                                                                                                                 |
| chr19 | 5679381  | 5727316  | M6, M9                | LRRCE8, MAP2K7, TGFBR3L, SNAPC2, CTXN1, TIMM44, ELAVL1, COL25, RN7SL115P                                                                                                                                                                                                                                                                                                                                                                                                                                                                                                                                                                                                                                                                                                                                                                                                                                                                                                                                                                                                                                                                                                                                                                                                                                                                                                                                                                                                                                                                                                                                                                                                                                                                                                                                                                                                                                                                                                                                                                                                                                                                                                                                                                                                                                                                                                                                                                                                                                                                                                                                                                                                                                                                                                                                                                                                                                                                                                                                                                                                |
| chr19 | 6731251  | 6744637  | M6, M9                | COL25, FBN3, CERS4, CD320, NDUFA7, RPS28, KANK3, ANGPTL4, RAB11B, MARCH2, HNRNPM, PRAM1, ZNF414, MYO1F, ADAMTS10, ACTL9, OR22I1, ZNF558, RAB11B-AS1, MIR4999, RPL23AP78                                                                                                                                                                                                                                                                                                                                                                                                                                                                                                                                                                                                                                                                                                                                                                                                                                                                                                                                                                                                                                                                                                                                                                                                                                                                                                                                                                                                                                                                                                                                                                                                                                                                                                                                                                                                                                                                                                                                                                                                                                                                                                                                                                                                                                                                                                                                                                                                                                                                                                                                                                                                                                                                                                                                                                                                                                                                                                 |
| chr19 | 6744637  | 7960554  | M9                    | ZNF558, MBD3L1, MUC16                                                                                                                                                                                                                                                                                                                                                                                                                                                                                                                                                                                                                                                                                                                                                                                                                                                                                                                                                                                                                                                                                                                                                                                                                                                                                                                                                                                                                                                                                                                                                                                                                                                                                                                                                                                                                                                                                                                                                                                                                                                                                                                                                                                                                                                                                                                                                                                                                                                                                                                                                                                                                                                                                                                                                                                                                                                                                                                                                                                                                                                   |
| chr19 | 7960554  | 8117969  | M6, M9                | MUC16                                                                                                                                                                                                                                                                                                                                                                                                                                                                                                                                                                                                                                                                                                                                                                                                                                                                                                                                                                                                                                                                                                                                                                                                                                                                                                                                                                                                                                                                                                                                                                                                                                                                                                                                                                                                                                                                                                                                                                                                                                                                                                                                                                                                                                                                                                                                                                                                                                                                                                                                                                                                                                                                                                                                                                                                                                                                                                                                                                                                                                                                   |
| chr19 | 8117969  | 8923850  | M9                    | MUC16                                                                                                                                                                                                                                                                                                                                                                                                                                                                                                                                                                                                                                                                                                                                                                                                                                                                                                                                                                                                                                                                                                                                                                                                                                                                                                                                                                                                                                                                                                                                                                                                                                                                                                                                                                                                                                                                                                                                                                                                                                                                                                                                                                                                                                                                                                                                                                                                                                                                                                                                                                                                                                                                                                                                                                                                                                                                                                                                                                                                                                                                   |
| chr19 | 8923850  | 8976259  | M14, M9               | MUC16                                                                                                                                                                                                                                                                                                                                                                                                                                                                                                                                                                                                                                                                                                                                                                                                                                                                                                                                                                                                                                                                                                                                                                                                                                                                                                                                                                                                                                                                                                                                                                                                                                                                                                                                                                                                                                                                                                                                                                                                                                                                                                                                                                                                                                                                                                                                                                                                                                                                                                                                                                                                                                                                                                                                                                                                                                                                                                                                                                                                                                                                   |
| chr19 | 8976259  | 8993372  | M1, M14, M9           | MUC16                                                                                                                                                                                                                                                                                                                                                                                                                                                                                                                                                                                                                                                                                                                                                                                                                                                                                                                                                                                                                                                                                                                                                                                                                                                                                                                                                                                                                                                                                                                                                                                                                                                                                                                                                                                                                                                                                                                                                                                                                                                                                                                                                                                                                                                                                                                                                                                                                                                                                                                                                                                                                                                                                                                                                                                                                                                                                                                                                                                                                                                                   |
| chr19 | 8993372  | 8996320  | M1, M14, M16, M9      | MUC16                                                                                                                                                                                                                                                                                                                                                                                                                                                                                                                                                                                                                                                                                                                                                                                                                                                                                                                                                                                                                                                                                                                                                                                                                                                                                                                                                                                                                                                                                                                                                                                                                                                                                                                                                                                                                                                                                                                                                                                                                                                                                                                                                                                                                                                                                                                                                                                                                                                                                                                                                                                                                                                                                                                                                                                                                                                                                                                                                                                                                                                                   |
| chr19 | 8996320  | 9027281  | M1, M14, M16, M17, M9 | MUC16                                                                                                                                                                                                                                                                                                                                                                                                                                                                                                                                                                                                                                                                                                                                                                                                                                                                                                                                                                                                                                                                                                                                                                                                                                                                                                                                                                                                                                                                                                                                                                                                                                                                                                                                                                                                                                                                                                                                                                                                                                                                                                                                                                                                                                                                                                                                                                                                                                                                                                                                                                                                                                                                                                                                                                                                                                                                                                                                                                                                                                                                   |
| chr19 | 9027281  | 9028396  | M14, M16, M9          | MUC16                                                                                                                                                                                                                                                                                                                                                                                                                                                                                                                                                                                                                                                                                                                                                                                                                                                                                                                                                                                                                                                                                                                                                                                                                                                                                                                                                                                                                                                                                                                                                                                                                                                                                                                                                                                                                                                                                                                                                                                                                                                                                                                                                                                                                                                                                                                                                                                                                                                                                                                                                                                                                                                                                                                                                                                                                                                                                                                                                                                                                                                                   |
| chr19 | 9028396  | 9768747  | M14, M9               | MUC16, OR1M1, OR7G2, OR7G1, OR7G3, ZNF317, OR7D2, OR7D4, OR7E24, ZNF699, ZNF559, ZNF559-ZNF177, ZNF177, ZNF266, ZNF560, ZNF426, ZNF121, ZNF561, C19orf82, ZNF562, OR1M4P, TCEB1P29, OR7E16P, OR7E25P, OR7D1P, OR7E18P, OR7E19P, OR7H1P                                                                                                                                                                                                                                                                                                                                                                                                                                                                                                                                                                                                                                                                                                                                                                                                                                                                                                                                                                                                                                                                                                                                                                                                                                                                                                                                                                                                                                                                                                                                                                                                                                                                                                                                                                                                                                                                                                                                                                                                                                                                                                                                                                                                                                                                                                                                                                                                                                                                                                                                                                                                                                                                                                                                                                                                                                  |
| chr19 | 9768747  | 10078022 | M9                    | ZNF562, ZNF812, ZNF846, FBXL12, UBL5, PIN1, OLFM2, COL5A3, RPS4XP22, UBE2L4, RN7SL94P                                                                                                                                                                                                                                                                                                                                                                                                                                                                                                                                                                                                                                                                                                                                                                                                                                                                                                                                                                                                                                                                                                                                                                                                                                                                                                                                                                                                                                                                                                                                                                                                                                                                                                                                                                                                                                                                                                                                                                                                                                                                                                                                                                                                                                                                                                                                                                                                                                                                                                                                                                                                                                                                                                                                                                                                                                                                                                                                                                                   |
| chr19 | 10078022 | 10116907 | M1, M9                | COL5A3                                                                                                                                                                                                                                                                                                                                                                                                                                                                                                                                                                                                                                                                                                                                                                                                                                                                                                                                                                                                                                                                                                                                                                                                                                                                                                                                                                                                                                                                                                                                                                                                                                                                                                                                                                                                                                                                                                                                                                                                                                                                                                                                                                                                                                                                                                                                                                                                                                                                                                                                                                                                                                                                                                                                                                                                                                                                                                                                                                                                                                                                  |



|       |           |           |                    |                                                                                                                                                                                                                                                                                                                                                                                                                                                                                                                                                                                                                                                                                                                                                                                                                                                                                                                                                                                                                                                                                                                                                                                                                                                                                                                                                                                                                                                                                                                                                                                                                                                                                                                                                                                                                                                                                                                                                                                                                                                                                                                                                                                                  |
|-------|-----------|-----------|--------------------|--------------------------------------------------------------------------------------------------------------------------------------------------------------------------------------------------------------------------------------------------------------------------------------------------------------------------------------------------------------------------------------------------------------------------------------------------------------------------------------------------------------------------------------------------------------------------------------------------------------------------------------------------------------------------------------------------------------------------------------------------------------------------------------------------------------------------------------------------------------------------------------------------------------------------------------------------------------------------------------------------------------------------------------------------------------------------------------------------------------------------------------------------------------------------------------------------------------------------------------------------------------------------------------------------------------------------------------------------------------------------------------------------------------------------------------------------------------------------------------------------------------------------------------------------------------------------------------------------------------------------------------------------------------------------------------------------------------------------------------------------------------------------------------------------------------------------------------------------------------------------------------------------------------------------------------------------------------------------------------------------------------------------------------------------------------------------------------------------------------------------------------------------------------------------------------------------|
| chr19 | 10116907  | 10678093  | M9                 | COL5A3, RDH8, C19orf66, ANGPTL6, PAPAN-P2RY11, PAPAN, P2RY11, EIF3G, DNMT1, S1PR2, MRPL4, ICAM1, ICAM4, ICAM5, ZGLP1, FDX1L, RAVER1, ICAM3, TYK2, CDC37, PDE4A, KEAP1, S1PR5, ATG4D, KRI1, CDKN2D, C3P1, MIR5589, SNORD105, SNORD105B, MIR4322, MIR1181, RNU7-140P, MIR1238                                                                                                                                                                                                                                                                                                                                                                                                                                                                                                                                                                                                                                                                                                                                                                                                                                                                                                                                                                                                                                                                                                                                                                                                                                                                                                                                                                                                                                                                                                                                                                                                                                                                                                                                                                                                                                                                                                                      |
| chr19 | 36227659  | 36269979  | M6                 | KMT2B, IGFLR1, U2AF1L4, PSENE1, LIN37, HSPB6, C19orf55, ARHGAP33                                                                                                                                                                                                                                                                                                                                                                                                                                                                                                                                                                                                                                                                                                                                                                                                                                                                                                                                                                                                                                                                                                                                                                                                                                                                                                                                                                                                                                                                                                                                                                                                                                                                                                                                                                                                                                                                                                                                                                                                                                                                                                                                 |
| chr19 | 50357949  | 50391032  | M6                 | PTOV1, PNKP, AKT1S1, TBC1D17                                                                                                                                                                                                                                                                                                                                                                                                                                                                                                                                                                                                                                                                                                                                                                                                                                                                                                                                                                                                                                                                                                                                                                                                                                                                                                                                                                                                                                                                                                                                                                                                                                                                                                                                                                                                                                                                                                                                                                                                                                                                                                                                                                     |
| chr19 | 54600299  | 54710236  | M6                 | OSCAR, NDUFA3, TFPT, PRPF31, CNOT3, LENG1, TMC4, MBOAT7, TSEN34, RPS9                                                                                                                                                                                                                                                                                                                                                                                                                                                                                                                                                                                                                                                                                                                                                                                                                                                                                                                                                                                                                                                                                                                                                                                                                                                                                                                                                                                                                                                                                                                                                                                                                                                                                                                                                                                                                                                                                                                                                                                                                                                                                                                            |
| chr19 | 56109102  | 56203271  | M6                 | FIZ1, ZNF524, ZNF865, ZNF784, ZNF580, ZNF581, CCDC106, U2AF2, EPN1                                                                                                                                                                                                                                                                                                                                                                                                                                                                                                                                                                                                                                                                                                                                                                                                                                                                                                                                                                                                                                                                                                                                                                                                                                                                                                                                                                                                                                                                                                                                                                                                                                                                                                                                                                                                                                                                                                                                                                                                                                                                                                                               |
| chr19 | 58874081  | 59061743  | M6                 | RNA5SP473, MIR4754, RNU6-1337P, RN7SL693P, RN7SL525P, ZNF497, ZNF837, RPS5, ZNF584, ZNF132, ZNF324B, ZNF324, ZNF446, SLC27A5, ZBTB45, TRIM28                                                                                                                                                                                                                                                                                                                                                                                                                                                                                                                                                                                                                                                                                                                                                                                                                                                                                                                                                                                                                                                                                                                                                                                                                                                                                                                                                                                                                                                                                                                                                                                                                                                                                                                                                                                                                                                                                                                                                                                                                                                     |
| chr19 | 59061743  | 59094187  | M16, M6            | CENPBD1P1, TRIM28, CHMP2A, UBE2M, MZF1                                                                                                                                                                                                                                                                                                                                                                                                                                                                                                                                                                                                                                                                                                                                                                                                                                                                                                                                                                                                                                                                                                                                                                                                                                                                                                                                                                                                                                                                                                                                                                                                                                                                                                                                                                                                                                                                                                                                                                                                                                                                                                                                                           |
| chr19 | 59094187  | 59095763  | M16                | CENPBD1P1                                                                                                                                                                                                                                                                                                                                                                                                                                                                                                                                                                                                                                                                                                                                                                                                                                                                                                                                                                                                                                                                                                                                                                                                                                                                                                                                                                                                                                                                                                                                                                                                                                                                                                                                                                                                                                                                                                                                                                                                                                                                                                                                                                                        |
| chr2  | 45439     | 283175    | M17                | FAM110C, SH3YL1, ACP1, FAM150B                                                                                                                                                                                                                                                                                                                                                                                                                                                                                                                                                                                                                                                                                                                                                                                                                                                                                                                                                                                                                                                                                                                                                                                                                                                                                                                                                                                                                                                                                                                                                                                                                                                                                                                                                                                                                                                                                                                                                                                                                                                                                                                                                                   |
| chr2  | 27579736  | 27663543  | M6                 | GTF3C2, EIF2B4, SNX17, ZNF513, PPM1G, NRBP1, FTH1P3                                                                                                                                                                                                                                                                                                                                                                                                                                                                                                                                                                                                                                                                                                                                                                                                                                                                                                                                                                                                                                                                                                                                                                                                                                                                                                                                                                                                                                                                                                                                                                                                                                                                                                                                                                                                                                                                                                                                                                                                                                                                                                                                              |
| chr2  | 95426674  | 95541487  | M17                | SNX18P14, ANKRD20A8P, RNU6-1320P, TEKT4                                                                                                                                                                                                                                                                                                                                                                                                                                                                                                                                                                                                                                                                                                                                                                                                                                                                                                                                                                                                                                                                                                                                                                                                                                                                                                                                                                                                                                                                                                                                                                                                                                                                                                                                                                                                                                                                                                                                                                                                                                                                                                                                                          |
| chr2  | 137852442 | 151344180 | M16                | YWHAEP5, RN7SKP286, YY1P2, AHCYP4, MRPS18BP2, RN7SL283P, MTND2P19, MTND1P27, RNU6-904P, MTND6P11, MTND5P24, MTND4P22, MTND3P9, ZEB2-AS1, TEX41, RPL6P5, RNU7-2P, RPL17P12, PABPC1P2, RNU6-692P, RNU6-715P, RNA5SP106, RNU6-1275P, RNU2-9P, UBBP3, TXNP5, FAM8A3P, RNU6-601P, RNA5SP105, THSD7B, HNMT, SPOPL, NXPH2, LRP1B, KYNU, ARHGAP15, GTDC1, ZEB2, ACVR2A, ORC4, MBD5, EPC2, KIF5C, LYPD6B, LYPD6, MMADHC, RND3                                                                                                                                                                                                                                                                                                                                                                                                                                                                                                                                                                                                                                                                                                                                                                                                                                                                                                                                                                                                                                                                                                                                                                                                                                                                                                                                                                                                                                                                                                                                                                                                                                                                                                                                                                             |
| chr2  | 179392172 | 179400708 | M17                | TTN-AS1, TTN                                                                                                                                                                                                                                                                                                                                                                                                                                                                                                                                                                                                                                                                                                                                                                                                                                                                                                                                                                                                                                                                                                                                                                                                                                                                                                                                                                                                                                                                                                                                                                                                                                                                                                                                                                                                                                                                                                                                                                                                                                                                                                                                                                                     |
| chr2  | 179400708 | 179406008 | M17, M2            | TTN-AS1, TTN                                                                                                                                                                                                                                                                                                                                                                                                                                                                                                                                                                                                                                                                                                                                                                                                                                                                                                                                                                                                                                                                                                                                                                                                                                                                                                                                                                                                                                                                                                                                                                                                                                                                                                                                                                                                                                                                                                                                                                                                                                                                                                                                                                                     |
| chr2  | 179406008 | 180036960 | M16, M17, M2       | TTN-AS1, RNU7-104P, RPS6P2, CCDC141, SESTD1, TTN                                                                                                                                                                                                                                                                                                                                                                                                                                                                                                                                                                                                                                                                                                                                                                                                                                                                                                                                                                                                                                                                                                                                                                                                                                                                                                                                                                                                                                                                                                                                                                                                                                                                                                                                                                                                                                                                                                                                                                                                                                                                                                                                                 |
| chr2  | 180036960 | 182756737 | M16, M17           | MIR1258, FTH1P20, MIR4437, RNU6ATAC19P, SESTD1, ZNF385B, CWC22, UBE2E3, ITGA4, CERKL, NEUROD1, SSFA2                                                                                                                                                                                                                                                                                                                                                                                                                                                                                                                                                                                                                                                                                                                                                                                                                                                                                                                                                                                                                                                                                                                                                                                                                                                                                                                                                                                                                                                                                                                                                                                                                                                                                                                                                                                                                                                                                                                                                                                                                                                                                             |
| chr2  | 182756737 | 183731150 | M14, M16, M17      | KRT18P29, RNA5SP113, RN7SL287P, RPL31P15, SSFA2, PPP1R1C, PDE1A, DNAJC10, FRZB                                                                                                                                                                                                                                                                                                                                                                                                                                                                                                                                                                                                                                                                                                                                                                                                                                                                                                                                                                                                                                                                                                                                                                                                                                                                                                                                                                                                                                                                                                                                                                                                                                                                                                                                                                                                                                                                                                                                                                                                                                                                                                                   |
| chr2  | 183731150 | 187694453 | M16, M17           | DUSP19, NUP35, ZNF804A, FSI2P2, RNU6-1122P, KRT8P10, LIN28AP1, CACYBP2, MIR548AE1, RPL21P32, RPL23AP35, MED28P3, DPRXP1, ZC3H15, ITGAV, FAM171B, ZSWIM2, FRZB, NCKAP1                                                                                                                                                                                                                                                                                                                                                                                                                                                                                                                                                                                                                                                                                                                                                                                                                                                                                                                                                                                                                                                                                                                                                                                                                                                                                                                                                                                                                                                                                                                                                                                                                                                                                                                                                                                                                                                                                                                                                                                                                            |
| chr2  | 187694453 | 189248552 | M11, M16, M17      | RN7SKP42, RNU6-989P, GAPDHP59, LINC01090, ST13P2, RNA5SP114, MIR561, ZSWIM2, CALCRL, TFP1, GULP1                                                                                                                                                                                                                                                                                                                                                                                                                                                                                                                                                                                                                                                                                                                                                                                                                                                                                                                                                                                                                                                                                                                                                                                                                                                                                                                                                                                                                                                                                                                                                                                                                                                                                                                                                                                                                                                                                                                                                                                                                                                                                                 |
| chr2  | 189248552 | 189851865 | M11, M14, M16, M17 | MIR1245A, GULP1, DIRC1, COL3A1                                                                                                                                                                                                                                                                                                                                                                                                                                                                                                                                                                                                                                                                                                                                                                                                                                                                                                                                                                                                                                                                                                                                                                                                                                                                                                                                                                                                                                                                                                                                                                                                                                                                                                                                                                                                                                                                                                                                                                                                                                                                                                                                                                   |
| chr2  | 189851865 | 189852806 | M11, M14, M16      | COL3A1                                                                                                                                                                                                                                                                                                                                                                                                                                                                                                                                                                                                                                                                                                                                                                                                                                                                                                                                                                                                                                                                                                                                                                                                                                                                                                                                                                                                                                                                                                                                                                                                                                                                                                                                                                                                                                                                                                                                                                                                                                                                                                                                                                                           |
| chr2  | 189852806 | 189852806 | M11, M14, M16, M17 | COL3A1                                                                                                                                                                                                                                                                                                                                                                                                                                                                                                                                                                                                                                                                                                                                                                                                                                                                                                                                                                                                                                                                                                                                                                                                                                                                                                                                                                                                                                                                                                                                                                                                                                                                                                                                                                                                                                                                                                                                                                                                                                                                                                                                                                                           |
| chr2  | 189852806 | 189853315 | M11, M14, M17      | COL3A1                                                                                                                                                                                                                                                                                                                                                                                                                                                                                                                                                                                                                                                                                                                                                                                                                                                                                                                                                                                                                                                                                                                                                                                                                                                                                                                                                                                                                                                                                                                                                                                                                                                                                                                                                                                                                                                                                                                                                                                                                                                                                                                                                                                           |
| chr2  | 189853315 | 189975062 | M11, M14, M16, M17 | COL3A1, COL5A2                                                                                                                                                                                                                                                                                                                                                                                                                                                                                                                                                                                                                                                                                                                                                                                                                                                                                                                                                                                                                                                                                                                                                                                                                                                                                                                                                                                                                                                                                                                                                                                                                                                                                                                                                                                                                                                                                                                                                                                                                                                                                                                                                                                   |
| chr2  | 189975062 | 190044605 | M11, M16, M17      | MIR3129, COL5A2                                                                                                                                                                                                                                                                                                                                                                                                                                                                                                                                                                                                                                                                                                                                                                                                                                                                                                                                                                                                                                                                                                                                                                                                                                                                                                                                                                                                                                                                                                                                                                                                                                                                                                                                                                                                                                                                                                                                                                                                                                                                                                                                                                                  |
| chr2  | 190044605 | 190315694 | M11, M16           | KRT18P19, COL5A2, WDR75                                                                                                                                                                                                                                                                                                                                                                                                                                                                                                                                                                                                                                                                                                                                                                                                                                                                                                                                                                                                                                                                                                                                                                                                                                                                                                                                                                                                                                                                                                                                                                                                                                                                                                                                                                                                                                                                                                                                                                                                                                                                                                                                                                          |
| chr2  | 190315694 | 190316621 | M11                | WDR75                                                                                                                                                                                                                                                                                                                                                                                                                                                                                                                                                                                                                                                                                                                                                                                                                                                                                                                                                                                                                                                                                                                                                                                                                                                                                                                                                                                                                                                                                                                                                                                                                                                                                                                                                                                                                                                                                                                                                                                                                                                                                                                                                                                            |
| chr2  | 209103794 | 215919388 | M16                | IDH1-AS1, RNA5SP117, HSPA8P6, CRYGFP, MEAF6P1, PKP4P1, RNA5SP118, SNAI1P1, RNA5SP119, MTND2P23, MIR548F2, PCED1CP, MIR4776-1, MIR4776-2, MIR4438, RPL5P8, VWC2L-IT1, ENSAP3, IDH1, PIKFYVE, PTH2R, MAP2, UNC80, RPE, KANSL1L, ACADL, MYL1, LANCL1, CPS1, ERBB4, IKZF2, SPAG16, VWC2L, BARD1, ABCA12                                                                                                                                                                                                                                                                                                                                                                                                                                                                                                                                                                                                                                                                                                                                                                                                                                                                                                                                                                                                                                                                                                                                                                                                                                                                                                                                                                                                                                                                                                                                                                                                                                                                                                                                                                                                                                                                                              |
| chr2  | 227872733 | 227886763 | M17                | COL4A4                                                                                                                                                                                                                                                                                                                                                                                                                                                                                                                                                                                                                                                                                                                                                                                                                                                                                                                                                                                                                                                                                                                                                                                                                                                                                                                                                                                                                                                                                                                                                                                                                                                                                                                                                                                                                                                                                                                                                                                                                                                                                                                                                                                           |
| chr2  | 227886763 | 228167826 | M1, M17            | COL4A4, COL4A3                                                                                                                                                                                                                                                                                                                                                                                                                                                                                                                                                                                                                                                                                                                                                                                                                                                                                                                                                                                                                                                                                                                                                                                                                                                                                                                                                                                                                                                                                                                                                                                                                                                                                                                                                                                                                                                                                                                                                                                                                                                                                                                                                                                   |
| chr2  | 228167826 | 228172626 | M1                 | COL4A3                                                                                                                                                                                                                                                                                                                                                                                                                                                                                                                                                                                                                                                                                                                                                                                                                                                                                                                                                                                                                                                                                                                                                                                                                                                                                                                                                                                                                                                                                                                                                                                                                                                                                                                                                                                                                                                                                                                                                                                                                                                                                                                                                                                           |
| chr20 | 5585047   | 25062537  | M14                | SDAD1P2, FAT1P1, RPS11P1, PGAM3P, LINC00687, RN7SKP111, PA2G4P2, ISM1-AS1, GAPDHP2, RNU6-278P, RPS3P1, AIMP1P1, RN7SL864P, RNU6-228P, MACROD2-IT1, RPS10P2, MACROD2-AS1, RNU6-1159P, RNU6-115P, RNA5SP475, ENSAP1, PPIAP17, RPLP0P1, RNU6-27P, RNU1-131P, DYNLT3P1, RPS27AP2, RN7SKP69, RNU6-192P, SNORD17, PTMAP3, RPL15P1, RNU7-137P, RN7SL14P, RNU2-56P, RN7SKP74, RNY4P11, LINC00851, GCNT1P1, RNA5SP476, MIR3192, RPL21P3, RPS19P1, LINC00493, RN7SL638P, RNU6ATAC34P, DUXAP7, EEF1A1P34, LINC00652, RPL17P1, RN7SL690P, EIF4E2P1, RN7SL607P, MRPS11P1, LINC00237, RPL24P2, PLK1S1, RNA5SP477, RPS15AP1, ZNF877P, RN7SKP140, GSTM3P1, NKX2-2-AS1, SLC25A6P1, RPL41P1, LINC00261, KRT18P3, LINC00656, RNA5SP478, RNA5SP479, CST12P, CST13P, CST9LP1, CST2P1, CSTP1, POM12L1L3P, RNU1-23P, GAPDHP53, RNU6-1257P, GPCPD1, C20orf196, CHGB, TRMT6, MCM8, CRLS1, LRRN4, FERMT1, BMP2, HAO1, RNU1-55P, RN7SL498P, TARDBPP1, CASC20, RN7SL547P, TMX4, PHKBP1, PLCB1-IT1, RNU105B, SNAP25-AS1, HIGD1AP15, RPL23AP6, PLCB1, PLCB4, LAMP5, PAK7, ANKEF1, SNAP25, MKKS, SLX4IP, JAG1, C20orf187, BTBD3, SPTLC3, ISM1, TASP1, ESF1, NDUFAF5, SEL1L2, MACROD2, FLRT3, KIF16B, SNRPB2, OTOR, PCSK2, BFPSP1, DSTN, RRBP1, BANF2, SNX5, OVOL2, MGME1, PET117, CSRP2BP, ZNF133, DZANK1, POLR3F, RBBP9, SEC23B, DTD1, C20orf78, SCP2D1, SLC24A3, RIN2, NAA20, CRNK1, C20orf26, INSM1, RALGAPA2, XRN2, NKX2-4, NKX2-2, PAX1, FOXA2, SSTR4, THBD, CD93, NXT1, GZF1, NABP, CSTL1, CST11, CST8, CST9L, CST9, CST3, CST4, CST1, CST2, CST5, GGTL1C1, SYNDIG1, CST7, APMAP, ACSS1, VSX1                                                                                                                                                                                                                                                                                                                                                                                                                                                                                                                                                                                                                             |
| chr20 | 44566140  | 44642837  | M6                 | FTLP1, PCIF1, ZNF335, MMP9                                                                                                                                                                                                                                                                                                                                                                                                                                                                                                                                                                                                                                                                                                                                                                                                                                                                                                                                                                                                                                                                                                                                                                                                                                                                                                                                                                                                                                                                                                                                                                                                                                                                                                                                                                                                                                                                                                                                                                                                                                                                                                                                                                       |
| chr20 | 55748310  | 55949662  | M14                | BMP7, SPO11, RAE1, MTRNR2L3, MIR4325, MTND1P9                                                                                                                                                                                                                                                                                                                                                                                                                                                                                                                                                                                                                                                                                                                                                                                                                                                                                                                                                                                                                                                                                                                                                                                                                                                                                                                                                                                                                                                                                                                                                                                                                                                                                                                                                                                                                                                                                                                                                                                                                                                                                                                                                    |
| chr20 | 55949662  | 58644992  | M11, M14           | CTSZ, TUBB1, ATP5E, SLMO2, ZNF831, EDN3, PHACTR3, RAE1, RBM38, SYCP2, CTCFL, FAM217B, PPP1R3D, CDH26, C20orf197, PCK1, ZBP1, PMEPA1, C20orf85, ANKRD60, PPP4R1L, RAB22A, HMGB1P1, MIR4532, APCDD1L-AS1, PIEZO1P2, MIR296, MIR298, GNAS-AS1, MRPS16P2, VAPB, PIEZO1P1, RNU7-141P, APCDD1L, STX16, STX16-NPEPL1, NPEPL1, GNAS, NELFCD, C20orf197, CDH4, TAF4, MIR646, MTCO2P1, MIR4533, MIR548AG2, MIR1257                                                                                                                                                                                                                                                                                                                                                                                                                                                                                                                                                                                                                                                                                                                                                                                                                                                                                                                                                                                                                                                                                                                                                                                                                                                                                                                                                                                                                                                                                                                                                                                                                                                                                                                                                                                         |
| chr20 | 58644992  | 60640866  | M11                | POTEH                                                                                                                                                                                                                                                                                                                                                                                                                                                                                                                                                                                                                                                                                                                                                                                                                                                                                                                                                                                                                                                                                                                                                                                                                                                                                                                                                                                                                                                                                                                                                                                                                                                                                                                                                                                                                                                                                                                                                                                                                                                                                                                                                                                            |
| chr22 | 16256331  | 16256504  | M1, M2             | POTEH                                                                                                                                                                                                                                                                                                                                                                                                                                                                                                                                                                                                                                                                                                                                                                                                                                                                                                                                                                                                                                                                                                                                                                                                                                                                                                                                                                                                                                                                                                                                                                                                                                                                                                                                                                                                                                                                                                                                                                                                                                                                                                                                                                                            |
| chr22 | 16256504  | 16449314  | M1, M14, M2        | POTEH, OR11H1, POTEH-AS1, RNU6-816P, MED15P7, NF1P6, NEK2P2, ARHGAP42P3                                                                                                                                                                                                                                                                                                                                                                                                                                                                                                                                                                                                                                                                                                                                                                                                                                                                                                                                                                                                                                                                                                                                                                                                                                                                                                                                                                                                                                                                                                                                                                                                                                                                                                                                                                                                                                                                                                                                                                                                                                                                                                                          |
| chr22 | 16449314  | 17128147  | M1, M2             | OR11H1, CCT8L2, YME1L1P1, BNIP3P2, ZNF72P, ABCD1P4, PABPC1P9, SLC9B1P4, ACTR3BP6, CHEK2P4, KCNMB3P1, FBP5P11, TPTEP1, SLC25A15P5                                                                                                                                                                                                                                                                                                                                                                                                                                                                                                                                                                                                                                                                                                                                                                                                                                                                                                                                                                                                                                                                                                                                                                                                                                                                                                                                                                                                                                                                                                                                                                                                                                                                                                                                                                                                                                                                                                                                                                                                                                                                 |
| chr22 | 17128147  | 17626007  | M2                 | MTND1P17, IGKV1OR22-5, IGKV2OR22-4, IGKV2OR22-3, IGKV3OR22-1, CECR7, XKR3, GAB4, IL17RA, CECR6, CECR5, TPTEP1, PARP4P3, ANKRD62P1-PARP4P3, ANKRD62P1, VWF1, HSFY1P1, GPM6BP3, ZNF402P                                                                                                                                                                                                                                                                                                                                                                                                                                                                                                                                                                                                                                                                                                                                                                                                                                                                                                                                                                                                                                                                                                                                                                                                                                                                                                                                                                                                                                                                                                                                                                                                                                                                                                                                                                                                                                                                                                                                                                                                            |
| chr22 | 18644556  | 24342268  | M2                 | IGLL1, C22orf43, RGL4, ZNF70, VPREB3, GGT3P, C22orf15, CHCHD10, BCRP7, MMP11, DGCR5, DGCR9, DGCR10, CA15P1, SMARCB1, DGCR11, TSSK1A, KRT18P62, DERL3, RN7SL168P, MIR4761, MIR185, MIR3618, MIR1306, LINC00896, MIR1286, SLC2A11, MIF, GSTT2B, DDTL, DDT, GSTT2, PI4KAP1, RN7SKP131, CA15P2, PPP1R26P2, PPP1R26P3, RNU6-225P, KLHL22-IT1, RN7SL812P, KRT18P5, SMPD4P1, SLC9A3P2, ABHD17A4P4, POM12L1L4P, BCRP5, TMEM191A, RN7SL389P, THAP7-AS1, TUBA3FP, MIR649, P2RX6P, TUBA3GP, BCRP2, FAM230B, POM12L1L8P, BCRP6, FAM230C, PPP1R26P5, RN7SKP63, TMEM191C, PI4KAP2, RN7SKP221, MIR301B, MIR130B, RN7SL280P, RNA5SP493, PRAMENP, IGLV1-70, IGLV1-68, IGLV10-67, IGLV1V-66-1, IGLV1V-66, IGLV1V-65, IGLV1V-64, IGLV1-63, IGLV1-62, ABHD17A5P5, SOCS2P2, IGLV1V-59, IGLV1V-58, BMP6P1, IGLV1-56, IGLV1V-53, TOP3BP1, BMS1P20, IGLV1-42, IGLV1V-41-1, IGLV1-41, ASH2L1P1, IGLV1-38, IGLV1-35, IGLV2-34, IGLV3-31, IGLV3-30, BCRP4, POM12L1L1P, IGLV3-29, IGLV2-28, IGLV3-26, IGLV1V-25-1, IGLV3-24, IGLV1V-22-1, IGLV1-20, IGLV3-17, IGLV3-15, IGLV3-13, MIR650, IGLV3-7, IGLV3-6, IGLV2-5, IGLV3-4, IGLV3-2, IGLC4, IGLC5, IGLC6, BCRP8, RN7SL263P, FBXW4P1, CES5AP1, ZDHHC8P1, GUSBP11, ASLP1, RN7SL268P, GSTTP1, USP18, DGCR6, PRODH, DGCR2, DGCR14, TSSK2, GSC2, SLC25A1, CLTCL1, HIRA, C22orf39, MRPL40, UFD1L, CDC45, CLDN5, SEPT5, GP1BB, TBX1, GNB1L, C22orf29, TXNRD2, COMT, ARVCF, TANGO2, DGCR8, TRMT2A, RANBP1, ZDHHC8, RTN4R, DGCR6L, GGTL3, RIMBP3, FAM230A, USP41, ZNF74, SCARF2, KLHL22, MED15, PI4KA, SERPIND1, SNAP29, CRKL, AIFM3, LZTR1, THAP7, P2RX6, SLC7A4, POM12L1L7, GGT2, RIMBP3B, HIC2, RIMBP3C, UBE2L3, YDJC, CCDC116, SDF2L1, PPIL2, YPEL1, MAPK1, PPM1F, TOP3B, IGLV4-69, IGLV4-60, IGLV6-57, IGLV11-55, IGLV10-54, VPREB1, IGLV5-52, IGLV1-51, IGLV1-50, IGLV9-49, IGLV5-48, IGLV1-47, IGLV5-45, IGLV1-44, IGLV7-43, IGLV1-40, IGLV5-37, ZNF280B, ZNF280A, PRAME, IGLV2-33, IGLV3-32, GGTL2, IGLV3-27, IGLV3-25, IGLV2-23, IGLV3-22, IGLV3-21, IGLV3-19, IGLV2-18, IGLV3-16, IGLV2-14, IGLV3-12, IGLV2-11, IGLV3-10, IGLV3-9, IGLV2-8, IGLV4-3, IGLV3-1, IGLL5, IGLJ1, IGLC1, IGLJ2, IGLC2, IGLJ3, IGLC3, IGLJ4, IGLJ5, IGLJ6, IGLJ7, IGLC7, RTDR1, GNAZ, RAB36, BCR |
| chr22 | 24342268  | 24394849  | M1, M2             | GSTT1, GSTTP1, MTND1P13, EIF4EBP1P2, GSTTP2                                                                                                                                                                                                                                                                                                                                                                                                                                                                                                                                                                                                                                                                                                                                                                                                                                                                                                                                                                                                                                                                                                                                                                                                                                                                                                                                                                                                                                                                                                                                                                                                                                                                                                                                                                                                                                                                                                                                                                                                                                                                                                                                                      |
| chr22 | 24394849  | 25255807  | M2                 | CABIN1, SUSD2, GGT5, SPECC1L, SPECC1L-ADORA2A, ADORA2A, UPB1, GUCD1, SNRPD3, GGT1, FAM211B, PIWIL3, SGSM1, GSTTP2, POM12L1L9P, BCRP1, ADORA2A-AS1, BCRP3, POM12L1L10P, ARL5AP4, CRIP1P4                                                                                                                                                                                                                                                                                                                                                                                                                                                                                                                                                                                                                                                                                                                                                                                                                                                                                                                                                                                                                                                                                                                                                                                                                                                                                                                                                                                                                                                                                                                                                                                                                                                                                                                                                                                                                                                                                                                                                                                                          |

|       |           |           |          |                                                                                                                                                                                                                                                                                                                                                                                                                                                                                                                                                                                                                                                                                                                                                                                                                                                                                                                                                                                                                                                                                                                                                                                                                                                                                                                                                                                                                                                                                                                                                                                                                                                                                                                                                                                                                                                                                                                                                                                                                                                                                                                                                                                                                                                                                                                                                                                                                                                                                                                                                                                                                                                                                                                                                                                                                                                                                                                                                                                                                                                                                                                                                                                                                                                                                                                                                                                                                                                                                                                                                                                                                                                                                                                                                                                                                                                                                                                                                                                                                                                        |
|-------|-----------|-----------|----------|--------------------------------------------------------------------------------------------------------------------------------------------------------------------------------------------------------------------------------------------------------------------------------------------------------------------------------------------------------------------------------------------------------------------------------------------------------------------------------------------------------------------------------------------------------------------------------------------------------------------------------------------------------------------------------------------------------------------------------------------------------------------------------------------------------------------------------------------------------------------------------------------------------------------------------------------------------------------------------------------------------------------------------------------------------------------------------------------------------------------------------------------------------------------------------------------------------------------------------------------------------------------------------------------------------------------------------------------------------------------------------------------------------------------------------------------------------------------------------------------------------------------------------------------------------------------------------------------------------------------------------------------------------------------------------------------------------------------------------------------------------------------------------------------------------------------------------------------------------------------------------------------------------------------------------------------------------------------------------------------------------------------------------------------------------------------------------------------------------------------------------------------------------------------------------------------------------------------------------------------------------------------------------------------------------------------------------------------------------------------------------------------------------------------------------------------------------------------------------------------------------------------------------------------------------------------------------------------------------------------------------------------------------------------------------------------------------------------------------------------------------------------------------------------------------------------------------------------------------------------------------------------------------------------------------------------------------------------------------------------------------------------------------------------------------------------------------------------------------------------------------------------------------------------------------------------------------------------------------------------------------------------------------------------------------------------------------------------------------------------------------------------------------------------------------------------------------------------------------------------------------------------------------------------------------------------------------------------------------------------------------------------------------------------------------------------------------------------------------------------------------------------------------------------------------------------------------------------------------------------------------------------------------------------------------------------------------------------------------------------------------------------------------------------------------|
| chr22 | 27003852  | 29838443  | M2       | CRYBB1, CRYBA4, ISCA2P1, MN1, MIAT, PITPNB, RNU6-1066P, TTC28, TTC28-AS1, MIR3199-1, MIR3199-2, RN7SL757P, RN7SL162P, ZNRF3-IT1, ZNRF3-AS1, RNU6-810P, RNU6-1219P, SNORD125, RFPL1S, CHEK2, HSCB, CCDC117, XBP1, ZNRF3, C22of31, KREMEN1, EMID1, RHBDD3, EWSR1, GAS2L1, RASL10A, AP1B1, RFPL1                                                                                                                                                                                                                                                                                                                                                                                                                                                                                                                                                                                                                                                                                                                                                                                                                                                                                                                                                                                                                                                                                                                                                                                                                                                                                                                                                                                                                                                                                                                                                                                                                                                                                                                                                                                                                                                                                                                                                                                                                                                                                                                                                                                                                                                                                                                                                                                                                                                                                                                                                                                                                                                                                                                                                                                                                                                                                                                                                                                                                                                                                                                                                                                                                                                                                                                                                                                                                                                                                                                                                                                                                                                                                                                                                          |
| chr22 | 40750251  | 41863818  | M2       | COX6B1P3, RPL4P6, GAPDHP37, JTBP1, MIR4766, RNU6-379P, MIR1281, RNU6-375P, LRRC37A14P, RNU6-495P, ADSL, SGSM3, MKL1, MCHR1, SLC25A17, ST13, XPNPEP3, DNAJB7, RBX1, EP300, L3MBTL2, CHADL, RANGAP1, ZC3H7B, TEF, T02B, PHF5A                                                                                                                                                                                                                                                                                                                                                                                                                                                                                                                                                                                                                                                                                                                                                                                                                                                                                                                                                                                                                                                                                                                                                                                                                                                                                                                                                                                                                                                                                                                                                                                                                                                                                                                                                                                                                                                                                                                                                                                                                                                                                                                                                                                                                                                                                                                                                                                                                                                                                                                                                                                                                                                                                                                                                                                                                                                                                                                                                                                                                                                                                                                                                                                                                                                                                                                                                                                                                                                                                                                                                                                                                                                                                                                                                                                                                            |
| chr22 | 41969658  | 42377840  | M2       | RNU6-476P, HMG2P10, RNU6ATAC22P, MIR33A, MIR3781, LINC00634, CSCDC2, PMM1, DESI1, XRCC6, NHP2L1, C22orf46, MEI1, CCDC134, SREBF2, SHISA8, TNFRSF13C, CENPM, SEPT3                                                                                                                                                                                                                                                                                                                                                                                                                                                                                                                                                                                                                                                                                                                                                                                                                                                                                                                                                                                                                                                                                                                                                                                                                                                                                                                                                                                                                                                                                                                                                                                                                                                                                                                                                                                                                                                                                                                                                                                                                                                                                                                                                                                                                                                                                                                                                                                                                                                                                                                                                                                                                                                                                                                                                                                                                                                                                                                                                                                                                                                                                                                                                                                                                                                                                                                                                                                                                                                                                                                                                                                                                                                                                                                                                                                                                                                                                      |
| chr22 | 43019794  | 50436171  | M2       | RPL5P34, GOLGA2P4, EFCAB6-AS1, HMG2P9, MRPS18CP6, KRT18P23, LINC00207, LINC00229, ANP32BP2, MIR1249, RNU6-1161P, MIR4762, LINC00899, MIR3619, MIRLET7A3, MIR4763, CRIP1E7B, LINC00898, MIR3201, MIR4535, RPL35P8, MIR3667, RN7SKP252, RPL5P35, CYB5R3, ATP5L2, A4GALT, ARFGAP3, PACSIN2, TLL1, BIK, MCAT, TSPO, TLL12, SCUBE1, MPPED1, EFCAB6, SULT4A1, PNPLA5, PNPLA3, SAMM50, PARVB, PARVG, KIAA1644, LDCC1L, PRR5, PRR5-ARHGAP8, ARHGAP8, PHF21B, NUP50, KIAA0930, UPK3A, FAM118A, SMC1B, RIBC2, FBLN1, ATXN10, WNT7B, C22orf26, PPARA, CDPF1, PKDREJ, TTC38, GTSE1, TRMU, CELSR1, GRAMD4, CERK, TBC1D22A, FAM19A5, C22orf34, BRD1, ZBED4, ALG12, CRELD2, PIM3, IL17REL                                                                                                                                                                                                                                                                                                                                                                                                                                                                                                                                                                                                                                                                                                                                                                                                                                                                                                                                                                                                                                                                                                                                                                                                                                                                                                                                                                                                                                                                                                                                                                                                                                                                                                                                                                                                                                                                                                                                                                                                                                                                                                                                                                                                                                                                                                                                                                                                                                                                                                                                                                                                                                                                                                                                                                                                                                                                                                                                                                                                                                                                                                                                                                                                                                                                                                                                                                             |
| chr22 | 50943071  | 50970468  | M6       | LMF2, NCAPH2, SCO2, TYMP, ODF3B                                                                                                                                                                                                                                                                                                                                                                                                                                                                                                                                                                                                                                                                                                                                                                                                                                                                                                                                                                                                                                                                                                                                                                                                                                                                                                                                                                                                                                                                                                                                                                                                                                                                                                                                                                                                                                                                                                                                                                                                                                                                                                                                                                                                                                                                                                                                                                                                                                                                                                                                                                                                                                                                                                                                                                                                                                                                                                                                                                                                                                                                                                                                                                                                                                                                                                                                                                                                                                                                                                                                                                                                                                                                                                                                                                                                                                                                                                                                                                                                                        |
| chr22 | 51064363  | 51238064  | M2       | RNU6-409P, RPL23AP82, ARSA, SHANK3, ACR, RABL2B                                                                                                                                                                                                                                                                                                                                                                                                                                                                                                                                                                                                                                                                                                                                                                                                                                                                                                                                                                                                                                                                                                                                                                                                                                                                                                                                                                                                                                                                                                                                                                                                                                                                                                                                                                                                                                                                                                                                                                                                                                                                                                                                                                                                                                                                                                                                                                                                                                                                                                                                                                                                                                                                                                                                                                                                                                                                                                                                                                                                                                                                                                                                                                                                                                                                                                                                                                                                                                                                                                                                                                                                                                                                                                                                                                                                                                                                                                                                                                                                        |
| chr3  | 17208258  | 31665353  | M16      | PDCL3P3, RAD23BP1, RNU6-138P, MIR4791, HSPA8P18, RNU4-85P, MIR3135A, SGOL1-AS1, RNY4P22, RNU6-822P, RNU6-815P, VENTXP7, ZNF385D-AS1, ZNF385D-AS2, HMGB1P5, RANP7, SALL4P5, RPL24P7, UBE2E2-AS1, RNU6-922P, RNU6-788P, UBE2E1-AS1, LINC00691, NPM1P23, RPL31P20, THR-IT1, THR-IT1, MIR4792, EIF3KP2, RN7SL216P, RNA5SP125, CFL1P7, RNA5SP126, MIR4442, CRIP1P2, TAF9BP1, RPEP2, HMGB3P12, VENTXP4, MINO51P3, RNU6-342P, RN7SLB59P, RPS20P15, RNU1-96P, FAM96AP1, LINC00693, MESTP4, RBMS3-AS3, RPS12P5, RBMS3-AS2, RBMS3-AS1, CNN2P6, RNA5SP127, THRAP3P1, TBC1D5, SATB1, KCN8, EFHB, RAB5A, PP2D1, KAT2B, SGOL1, ZNF385D, UBE2E2, UBE2E1, NKIRAS1, RPL15, NR1D2, THR, RAR, TOP2B, NGLY1, OXSM, LINC00692, LRRC3B, NEK10, SLC4A7, EOMES, CMC1, AZI2, ZCWPW2, RBMS3, TGFB2, GADL1, STT3B                                                                                                                                                                                                                                                                                                                                                                                                                                                                                                                                                                                                                                                                                                                                                                                                                                                                                                                                                                                                                                                                                                                                                                                                                                                                                                                                                                                                                                                                                                                                                                                                                                                                                                                                                                                                                                                                                                                                                                                                                                                                                                                                                                                                                                                                                                                                                                                                                                                                                                                                                                                                                                                                                                                                                                                                                                                                                                                                                                                                                                                                                                                                                                                                                                                                 |
| chr3  | 48604339  | 48623679  | M1       | MIR711, COL7A1                                                                                                                                                                                                                                                                                                                                                                                                                                                                                                                                                                                                                                                                                                                                                                                                                                                                                                                                                                                                                                                                                                                                                                                                                                                                                                                                                                                                                                                                                                                                                                                                                                                                                                                                                                                                                                                                                                                                                                                                                                                                                                                                                                                                                                                                                                                                                                                                                                                                                                                                                                                                                                                                                                                                                                                                                                                                                                                                                                                                                                                                                                                                                                                                                                                                                                                                                                                                                                                                                                                                                                                                                                                                                                                                                                                                                                                                                                                                                                                                                                         |
| chr3  | 75790760  | 89531282  | M16      | RNU6-386P, VDACP7, RNU6-217P, RN7SL647P, RN7SKP61, MRPS17P3, RN7SL751P, MIR3923, HMGB1P38, OSBPL9P1, HNRNPA3P8, RNU2-28P, SETP6, RPL7AP23, CYP5A1P1, SRRM1P2, LINC00971, MIR5688, CADM2-AS2, CADM2-AS1, PKRIRP2, RNU6-1129P, RN7SKP284, PPATP1, MIR4795, KRT8P25, APOO2, PSMC1P6, RNU6-873P, RNU6ATAC6P, CBX5P1, ABCF2P1, NDUFA5P5, NARG2P2, GAPDHP50, ZNF717, ROBO2, ROBO1, GBE1, CADM2, VGLL3, CHMP2B, POU1F1, HTR1F, CGGBP1, ZNF654, C3orf38, EPHA3                                                                                                                                                                                                                                                                                                                                                                                                                                                                                                                                                                                                                                                                                                                                                                                                                                                                                                                                                                                                                                                                                                                                                                                                                                                                                                                                                                                                                                                                                                                                                                                                                                                                                                                                                                                                                                                                                                                                                                                                                                                                                                                                                                                                                                                                                                                                                                                                                                                                                                                                                                                                                                                                                                                                                                                                                                                                                                                                                                                                                                                                                                                                                                                                                                                                                                                                                                                                                                                                                                                                                                                                 |
| chr3  | 111261040 | 113442873 | M14      | WDR52, SPICE1, SIDT1, KIAA2018, NAA50, PLCXD2-AS1, RFKP2, MIR567, OR7E100P, WDR52-AS1, SIDT1-AS1, MIR4446, RN7SL767P, CD96, ZBED2, PLCXD2, PHLD2B, ABHD10, TAGLN3, TMPPRS7, C3orf52, GCSAM, SLC9C1, CD200, BTLA, ATG3, SLC35A5, CCDC80, CD200R1L, CD200R1, GTPBP8, C3orf17, BOC                                                                                                                                                                                                                                                                                                                                                                                                                                                                                                                                                                                                                                                                                                                                                                                                                                                                                                                                                                                                                                                                                                                                                                                                                                                                                                                                                                                                                                                                                                                                                                                                                                                                                                                                                                                                                                                                                                                                                                                                                                                                                                                                                                                                                                                                                                                                                                                                                                                                                                                                                                                                                                                                                                                                                                                                                                                                                                                                                                                                                                                                                                                                                                                                                                                                                                                                                                                                                                                                                                                                                                                                                                                                                                                                                                        |
| chr3  | 160956517 | 164700030 | M16      | NMD3, SPTSSB, OTOL1, SI, EEF1G4P, PSMC1P7, TOMM22P6, CT64, MIR1263, MIR720                                                                                                                                                                                                                                                                                                                                                                                                                                                                                                                                                                                                                                                                                                                                                                                                                                                                                                                                                                                                                                                                                                                                                                                                                                                                                                                                                                                                                                                                                                                                                                                                                                                                                                                                                                                                                                                                                                                                                                                                                                                                                                                                                                                                                                                                                                                                                                                                                                                                                                                                                                                                                                                                                                                                                                                                                                                                                                                                                                                                                                                                                                                                                                                                                                                                                                                                                                                                                                                                                                                                                                                                                                                                                                                                                                                                                                                                                                                                                                             |
| chr3  | 164700030 | 167090738 | M16, M17 | SI, SLITRK3, BCHE, ZBBX, MTND4P17, MTND3P7, RN7SKP298, PSAT1P4, CBX1P5                                                                                                                                                                                                                                                                                                                                                                                                                                                                                                                                                                                                                                                                                                                                                                                                                                                                                                                                                                                                                                                                                                                                                                                                                                                                                                                                                                                                                                                                                                                                                                                                                                                                                                                                                                                                                                                                                                                                                                                                                                                                                                                                                                                                                                                                                                                                                                                                                                                                                                                                                                                                                                                                                                                                                                                                                                                                                                                                                                                                                                                                                                                                                                                                                                                                                                                                                                                                                                                                                                                                                                                                                                                                                                                                                                                                                                                                                                                                                                                 |
| chr3  | 167090738 | 169550971 | M16      | EGFEM1P, RNU2-20P, MIR551B, RPL21P43, RNU6-637P, TERC, ZBBX, SERPINI2, WDR49, PDCD10, SERPINI1, GOLIM4, MECOM, ACTRT3, MYNN, LRRC34, LRRIG4, HMG1P8, MEMO1P3, HMG2P26                                                                                                                                                                                                                                                                                                                                                                                                                                                                                                                                                                                                                                                                                                                                                                                                                                                                                                                                                                                                                                                                                                                                                                                                                                                                                                                                                                                                                                                                                                                                                                                                                                                                                                                                                                                                                                                                                                                                                                                                                                                                                                                                                                                                                                                                                                                                                                                                                                                                                                                                                                                                                                                                                                                                                                                                                                                                                                                                                                                                                                                                                                                                                                                                                                                                                                                                                                                                                                                                                                                                                                                                                                                                                                                                                                                                                                                                                  |
| chr4  | 79766081  | 83292737  | M16      | RN7SL127P, LINC01088, LINC00989, OR7E9AP, PCAT4, RNU5A-2P, COX5BP1, NPM1P41, HNRNPA3P13, RNU6-499P, BIN2P1, BMP2K, PAQR3, NAA11, GK2, ANTXR2, PRDM8, FGF5, C4orf22, BMP3, PRKG2, RASGEF1B, HNRNPD                                                                                                                                                                                                                                                                                                                                                                                                                                                                                                                                                                                                                                                                                                                                                                                                                                                                                                                                                                                                                                                                                                                                                                                                                                                                                                                                                                                                                                                                                                                                                                                                                                                                                                                                                                                                                                                                                                                                                                                                                                                                                                                                                                                                                                                                                                                                                                                                                                                                                                                                                                                                                                                                                                                                                                                                                                                                                                                                                                                                                                                                                                                                                                                                                                                                                                                                                                                                                                                                                                                                                                                                                                                                                                                                                                                                                                                      |
| chr4  | 113825640 | 190948296 | M14      | RAB33B, SETD7, TMEM154, TIGD4, ADAD1, MIR3688-2, MIR3688-1, ARFIP1, POU4F2, RPS14P7, MTHFD2P4, TOMM22P4, FREM3, MGST2, RPL35AP12, RN7SKP105, ANP32C, RNU6-284P, RNU6-668P, TTC29, GRIA2, TRIM60P14, MAML3, FAM218BP, GYPE, NACA3P, FHDC1, SCOC, GYPB, RNU4-87P, GK3P, MIR578, HADHAP1, SCGB1D5P, TRIM2, FAM198B, IL2, EDNRA, MND1, IL21, RNA5SP170, TMEM144, CLGN, RNA5SP171, RN7SL776P, PHBP14, RN7SKP188, BTF3L4P4, BBS12, RNU6-1336P, RPL9P16, RNU6-853P, RNY4P17, RPL6P12, PTGES3P3, FGF2, APOBEC3AP1, HSP90AA6P, RNU6ATAC3P, TMEM184C, KIAA0922, RN7SL253P, MIR548T, NUDT6, RPL5P11, RNU6-1096P, ELMOD2, PRMT10, GYPA, SPATA5, HANO2-AS1, RFXN1, UCP1, TLR2, ARHGAP10, RNF175, TBC1D9, SFRP2, HHP, DCH32, RNF150, MORF4, RANP6, RN7SL184P, RNU1-138P, MIR4276, TSEN2P1, ADAM20P2, MIR577, CIR1P2, RN7SL808P, MRPS33P3, RFP2P2, PGAM4P2, KRT18P21, EIF3KP3, TTC39C1, SPRY1, PLRG1, ANKRD50, TRMT112P1, CUL4AP1, ACTN4P1, ANAPC10, RNU6-119P, NR3C2, FAT4, ZNF330, MARK2P4, RPSAP35, NT5C3AP1, FKB4P1, RN7SKP136, SNHG8, RNA5SP172, LINC01099, RNU1-45P, RNA5SP173, LINC00290, NDUFS5P5, CEP170P1, RN7SKP13, ABCE1, INTU, IL15, DCLK2, RNU6-1054P, C1CP16, MIR1305, RNU2-34P, RN7SKP67, KLHL2P1, RNU4-33P, FAM92A1P2, RNU6-1217P, WWC2-AS2, RNU7-158P, WWC2-AS1, VT118P2, RNU6-479P, RNU6-335P, RNU6-1053P, RN7SL28P, FGB, MIR3945, LINC01093, MIR4455, C4orf46, ETFDD, SLC25A31, INPP4B, RNU4-64P, ORAOV1P1, F11-AS1, OTUD4, LTV1P1, PPD, HMB3AL, SLC25A5P6, RNU6-1055P, RNU6-550P, SETP12, MRPS36P2, RN7SKP137, RNU6-948P, TUBB4BP5, RN7SL335P, FNIP2, ADAM20P3, LRBA, RNU6-173P, NARG2P1, LINC01060, C4orf45, RNU7-192P, RAPGEF2, HSP90AA4P, IL21-AS1, CETN4P, RNU1-51P, LINC01091, MLLT10P2, TUBB7P, RPL21P50, RNA5SP174, RNA5SP175, DUX4L9, TECRP2, NUPL1P1, TMEM248P1, PLK4, FSTL5, RBM48P1, FGA, RNU6-583P, FOSL1P1, ZSWIM5P3, FGG, RNY5P4, EEF1GP8, SMAD1, PGBD4P4, GAPDHP56, RNU6-224P, RN7SL205P, RPL7AP28, ELL2P2, USP38, NAF1, NPY1R, NPY5R, TKTL2, TMA16, R3HDM2P1, GAB1, PES1P1, MAB21L2, MAAA, RNU6-569P, KRT18P54, TARS2P1, RPS3A, LINC00613, RNU1-89P, MARCH1, TERF1P3, SERF1AP1, STMN1P2, RPS23P2, MFSDB, C4orf51, LINC00616, SLC7A11-AS1, LINC00498, LINC00499, ZNF827, LRAT, LINC00500, RNU6-531P, RN7SL382P, PPP1R14BP3, RN7SL311P, RNU6-506P, RBM46, RNU6-1074P, RNU6-1214P, SH3D19, NPY2R, TRIM61, SMARCA5, FAM218A, TRIM60, MAF9, TMEM192, C4orf29, KLHL2, FTH1P24, RN7SKP237, H3F3AP6, RN7SKP253, LSM6, RN7SL152P, TNRC18P1, RPL5P13, LSM3P4, MIR3139, SMARCA5-AS1, GUSBP5, SLC10A7, GUCY1A3, MSMO1, PRSS48, LARP1B, FAM160A1, GUCY1B3, CPE, PET112, TLL1, ASIC5, TDO2, SPOCK3, CTSO, FBXW7, PDGFC, KRT18P51, HHP-AS1, HSPD1P5, PGRMC1, RN7SKP235, RPS23P4, RTN3P1, MNAT1P4, SMAD1-AS2, SMAD1-AS1, LINC01095, RNU1-44P, MIR548G, GTF2F2P1, RNA5SP165, MIR4799, RN7SL254P, RNA5SP166, ATP5L4, RNU7-197P, RNA5SP167, RNU6-1230P, RNU7-194P, ZBTB80SP1, RNA5SP168, AK4P6, SNORD73A, RNU6-1282P, RN7SKP35, RNA5SP169, GLRB, JADE1, RN7SL466P, MIR3140, MIR4453, RNU6-1196P, ANXA2P1, RN7SL419P, RNU6-1285P, RNU2-66P, RNU2-44P, ANXA10, YWHAEP4, MTND6P17, MTND5P9, MTND4P8, MTND3P3, SCLT1, MTATP6P9, MTND2P33, MTND1P22, FTH1P21, RPPH1-3P, RNU6-582P, DDX60, NUDT19P5, C4orf33, RNU4-79P, RNU6-128P, FABP5P12, DDX60L, PCDH10, PABPC4L, PCDH18, SLC7A11, PALLD, CCRN4L, ELF2, MGARP, CBR4, NDUFC1, SH3RF1, NAA15, NEK1, CLCN3, C4orf27, MFAP3L, AADAT, GALNTL6, GALNT7, HMGB2, SAP30, SCRG1, HAND2, FBXO8, CEP44, HPGD, GLRA3, ADAM29, GPM6A, WDR17, SPATA4, ASB5, SPCS3, VEGFC, NEIL3, AGA, LINC01098, TENM3, CTD, WWC2, ANK2, CLDN22, CLDN24, CDKN2AIP, ING2, RWDD4, TRAPPC11, STOX2, ENPP6, IRF2, CASP3, PRIMPOL, CENPU, ACSL1, CAMK2D, HELT, SLC25A4, KIAA1430, SNX25, LRP2BP, ANKRD37, UFSF2, C4orf47, CCDC110, ARSJ, UGT8, NDST4, PDLIM3, MTRNR2L13, TRAM1L1, NDST3, SORBS2, PRSS12, METTL4, SEC24D, TLR3, SYNPO2, FAM149A, MYO22, USP53, CYP4V2, C4orf3, FABP2, PDE5A, KLBK1, F11, MTNR1A, FAT1, ZFP422, TRIM12, MAD2L1, FRG1, PRDM5, FRG2, NDNF, TNIP3, QRFRP, ANXA5, TMEM155, EXOSC9, CCNA2, BBS7, TRPC3, KIAA1109 |
| chr5  | 140372    | 1572074   | M2       | SDHAP3, PLEKHG4B, LRRC14B, CCDC127, SDHA, PDCD6, AHRH, C5orf55, EXOC3, SLC9A3, CEP72, PPPP, ZDHHC11, ZDHHC11B, BRD9, TRIP13, NKD2, SLC12A7, SLC6A19, SLC6A18, TERT, CLPTM1L, SLC6A3, LPCAT1, MIR4456, SPCS2P3, MIR4635, MIR4457                                                                                                                                                                                                                                                                                                                                                                                                                                                                                                                                                                                                                                                                                                                                                                                                                                                                                                                                                                                                                                                                                                                                                                                                                                                                                                                                                                                                                                                                                                                                                                                                                                                                                                                                                                                                                                                                                                                                                                                                                                                                                                                                                                                                                                                                                                                                                                                                                                                                                                                                                                                                                                                                                                                                                                                                                                                                                                                                                                                                                                                                                                                                                                                                                                                                                                                                                                                                                                                                                                                                                                                                                                                                                                                                                                                                                        |
| chr5  | 1572074   | 1599942   | M16, M2  | SDHAP3                                                                                                                                                                                                                                                                                                                                                                                                                                                                                                                                                                                                                                                                                                                                                                                                                                                                                                                                                                                                                                                                                                                                                                                                                                                                                                                                                                                                                                                                                                                                                                                                                                                                                                                                                                                                                                                                                                                                                                                                                                                                                                                                                                                                                                                                                                                                                                                                                                                                                                                                                                                                                                                                                                                                                                                                                                                                                                                                                                                                                                                                                                                                                                                                                                                                                                                                                                                                                                                                                                                                                                                                                                                                                                                                                                                                                                                                                                                                                                                                                                                 |
| chr5  | 1599942   | 1632959   | M16      |                                                                                                                                                                                                                                                                                                                                                                                                                                                                                                                                                                                                                                                                                                                                                                                                                                                                                                                                                                                                                                                                                                                                                                                                                                                                                                                                                                                                                                                                                                                                                                                                                                                                                                                                                                                                                                                                                                                                                                                                                                                                                                                                                                                                                                                                                                                                                                                                                                                                                                                                                                                                                                                                                                                                                                                                                                                                                                                                                                                                                                                                                                                                                                                                                                                                                                                                                                                                                                                                                                                                                                                                                                                                                                                                                                                                                                                                                                                                                                                                                                                        |
| chr5  | 1632959   | 9630463   | M16, M2  |                                                                                                                                                                                                                                                                                                                                                                                                                                                                                                                                                                                                                                                                                                                                                                                                                                                                                                                                                                                                                                                                                                                                                                                                                                                                                                                                                                                                                                                                                                                                                                                                                                                                                                                                                                                                                                                                                                                                                                                                                                                                                                                                                                                                                                                                                                                                                                                                                                                                                                                                                                                                                                                                                                                                                                                                                                                                                                                                                                                                                                                                                                                                                                                                                                                                                                                                                                                                                                                                                                                                                                                                                                                                                                                                                                                                                                                                                                                                                                                                                                                        |
| chr5  | 9630463   | 13721108  | M16      | MIR4277, LINC01019, LINC01020, RN7SKP73, ALG3P1, HMGB3P3, LINC01018, RN7SKP79, RNA5SP176, RNU1-76P, MIR4458HG, MTND6P2, MIR4636, SNHG18, SNORD123, MRPL36, NDUFS6, IRX4, IRX2, C5orf38, IRX1, ADAMT516, KIAA0947, MED10, UBE2QL1, NSUN2, SRD5A1, PAPD7, ADCY2, C5orf49, MTRR, FASTKD3, SEMA5A, TAS2R1                                                                                                                                                                                                                                                                                                                                                                                                                                                                                                                                                                                                                                                                                                                                                                                                                                                                                                                                                                                                                                                                                                                                                                                                                                                                                                                                                                                                                                                                                                                                                                                                                                                                                                                                                                                                                                                                                                                                                                                                                                                                                                                                                                                                                                                                                                                                                                                                                                                                                                                                                                                                                                                                                                                                                                                                                                                                                                                                                                                                                                                                                                                                                                                                                                                                                                                                                                                                                                                                                                                                                                                                                                                                                                                                                  |
| chr5  | 13721108  | 14769300  | M16, M2  | CMBL, MARCH6, RNA5SP177, ROPN1L, ANKRD33B, DAP, CTNND2, DNAH5, ROPN1L-AS1, RPL30P7, ANKRD33B-AS1, RNU6-429P, RNU6-679P, CT49, RPS23P5, TAS2R1, FAM173B, CCT5                                                                                                                                                                                                                                                                                                                                                                                                                                                                                                                                                                                                                                                                                                                                                                                                                                                                                                                                                                                                                                                                                                                                                                                                                                                                                                                                                                                                                                                                                                                                                                                                                                                                                                                                                                                                                                                                                                                                                                                                                                                                                                                                                                                                                                                                                                                                                                                                                                                                                                                                                                                                                                                                                                                                                                                                                                                                                                                                                                                                                                                                                                                                                                                                                                                                                                                                                                                                                                                                                                                                                                                                                                                                                                                                                                                                                                                                                           |
| chr5  | 14769300  | 31429581  | M16      | DNAH5, CTFE2, EEF1A1P13, TRIO, FAM105A, FAM105B, ANKH<br>BASP1, CDH18, CDH12, PRDM9, C5orf17, CDH10, CDH9, CDH6, DROSHA, RBBP4P1, MIR4637, UQCRRBP3, HNRNPKP5, SEPHS2P1, MARK2P5, MIR887, RNA5SP178, NACAP6, RNA5SP179, RNU6-660P, RNA5SP180, DCAF13P2, RNU6-1003P, RN7SKP133, FTH1P10, RPL36AP21, RN7SL58P, UBE2V1P12, RPL32P14, HSPD1P15, GUSBP1, HSPD1P12, RN7SL572P, RNU6-374P, MSNP1, RNU4-43P, RNU6-738P, LINC01021, RNU6-909P, LSP1P3, SUCLG2P4, UBL5P1, RN7SKP207, RPL19P11, ANKH, FBXL7, MARCH11, ZNF622, FAM134B, MYO10                                                                                                                                                                                                                                                                                                                                                                                                                                                                                                                                                                                                                                                                                                                                                                                                                                                                                                                                                                                                                                                                                                                                                                                                                                                                                                                                                                                                                                                                                                                                                                                                                                                                                                                                                                                                                                                                                                                                                                                                                                                                                                                                                                                                                                                                                                                                                                                                                                                                                                                                                                                                                                                                                                                                                                                                                                                                                                                                                                                                                                                                                                                                                                                                                                                                                                                                                                                                                                                                                                                      |
| chr5  | 31429581  | 37227175  | M16, M2  | RNU6-363P, RNU6-358P, RNU6-760P, RPL5P14, TPT1P5, MIR4279, RNU6-1079P, RNU6-378P, MIR579, RNU6-923P, RNU7-130P, MIR580, RNU6-1305P, NADK2-AS1, RNA5SP181, KRT18P31, RPS4XP6, OFD1P17, ADAMT512, SPEF2, RXFP3, SLC45A2, AMACR, C1QTNF3, IL7R, CAPSL, RA14, UGT3A1, DROSHA, UGT3A2, LMBRD2, SKP2, TTC23L, NADK2, RAD1, C5orf22, BRX1, RIN, RHP3AL, PDZD2, DNAJC21, SLC1A3, AGXT2, GOLPH3, NIPBL, MTMR12, PRLR, C5orf42, ZFR, SUB1, NPR3, TARS                                                                                                                                                                                                                                                                                                                                                                                                                                                                                                                                                                                                                                                                                                                                                                                                                                                                                                                                                                                                                                                                                                                                                                                                                                                                                                                                                                                                                                                                                                                                                                                                                                                                                                                                                                                                                                                                                                                                                                                                                                                                                                                                                                                                                                                                                                                                                                                                                                                                                                                                                                                                                                                                                                                                                                                                                                                                                                                                                                                                                                                                                                                                                                                                                                                                                                                                                                                                                                                                                                                                                                                                            |
| chr5  | 37227175  | 37443340  | M2       | RN7SL37P, RNU7-75P, NUP155, WDR70, C5orf42                                                                                                                                                                                                                                                                                                                                                                                                                                                                                                                                                                                                                                                                                                                                                                                                                                                                                                                                                                                                                                                                                                                                                                                                                                                                                                                                                                                                                                                                                                                                                                                                                                                                                                                                                                                                                                                                                                                                                                                                                                                                                                                                                                                                                                                                                                                                                                                                                                                                                                                                                                                                                                                                                                                                                                                                                                                                                                                                                                                                                                                                                                                                                                                                                                                                                                                                                                                                                                                                                                                                                                                                                                                                                                                                                                                                                                                                                                                                                                                                             |
| chr5  | 37443340  | 44310632  | M16, M2  | RNU6-1190P, RNU6-484P, GDNF-AS4, EGFLAM-AS3, EGFLAM-AS2, EGFLAM-AS1, LIFR-AS1, MIR3650, AIG1P1, GOLGA5P1, CCDC11P1, INTS6P1, GCSHP1, LINC00603, KRT18P56, LINC00604, RNU1-150P, SNORD72, RNU7-161P, OXCT1-AS1, MTHFD2P6, SERBP1P6, EEF1A1P19, NNT-AS1, RPL29P12, RNU6-381P, WDR70, GDNF, EGFLAM, LIFR, OSMR, RICTOR, FYB, C9, DAB2, PTGER4, TTC33, PRKAA1, RPL37, CARD6, C7, MROHB2, C6, PLCXD3, OXCT1, C5orf51, FBXO4, GHR, CCDC152, SEPP1, ANXA2R, ZNF131, NIM1K, HMGC1, CCL28, C5orf28, C5orf34, PAIP1, NNT, FGF10                                                                                                                                                                                                                                                                                                                                                                                                                                                                                                                                                                                                                                                                                                                                                                                                                                                                                                                                                                                                                                                                                                                                                                                                                                                                                                                                                                                                                                                                                                                                                                                                                                                                                                                                                                                                                                                                                                                                                                                                                                                                                                                                                                                                                                                                                                                                                                                                                                                                                                                                                                                                                                                                                                                                                                                                                                                                                                                                                                                                                                                                                                                                                                                                                                                                                                                                                                                                                                                                                                                                  |
| chr5  | 44310632  | 45696220  | M16      | FGF10-AS1, RN7SL383P, FGF10, MRPS30, HCN1                                                                                                                                                                                                                                                                                                                                                                                                                                                                                                                                                                                                                                                                                                                                                                                                                                                                                                                                                                                                                                                                                                                                                                                                                                                                                                                                                                                                                                                                                                                                                                                                                                                                                                                                                                                                                                                                                                                                                                                                                                                                                                                                                                                                                                                                                                                                                                                                                                                                                                                                                                                                                                                                                                                                                                                                                                                                                                                                                                                                                                                                                                                                                                                                                                                                                                                                                                                                                                                                                                                                                                                                                                                                                                                                                                                                                                                                                                                                                                                                              |

|      |           |           |               |                                                                                                                                                                                                                                                                                                                                                                                                                                                                                                                                                                                                                                                                                                                                                                                                                                                                                                                                                                                                                                                                                                                                                                                                                                                                                                                                                                                                                                                                                                                                                                                                                                                                                                                                                                                                                                                                                                                                                                                                                                                                                                                                                                                                                                                                                                                                                                                                                                                                                                                                                                                                                                                                                                                                                                                                                                                                                                                                                                                                                                                                                                                                                                                          |
|------|-----------|-----------|---------------|------------------------------------------------------------------------------------------------------------------------------------------------------------------------------------------------------------------------------------------------------------------------------------------------------------------------------------------------------------------------------------------------------------------------------------------------------------------------------------------------------------------------------------------------------------------------------------------------------------------------------------------------------------------------------------------------------------------------------------------------------------------------------------------------------------------------------------------------------------------------------------------------------------------------------------------------------------------------------------------------------------------------------------------------------------------------------------------------------------------------------------------------------------------------------------------------------------------------------------------------------------------------------------------------------------------------------------------------------------------------------------------------------------------------------------------------------------------------------------------------------------------------------------------------------------------------------------------------------------------------------------------------------------------------------------------------------------------------------------------------------------------------------------------------------------------------------------------------------------------------------------------------------------------------------------------------------------------------------------------------------------------------------------------------------------------------------------------------------------------------------------------------------------------------------------------------------------------------------------------------------------------------------------------------------------------------------------------------------------------------------------------------------------------------------------------------------------------------------------------------------------------------------------------------------------------------------------------------------------------------------------------------------------------------------------------------------------------------------------------------------------------------------------------------------------------------------------------------------------------------------------------------------------------------------------------------------------------------------------------------------------------------------------------------------------------------------------------------------------------------------------------------------------------------------------------|
| chr5 | 49692032  | 54592177  | M16,M2        | RNU6-480P, RNU6-1296P, HMG81P47, RNA5SP182, KATNBL1P4, RPS17P11, ASS1P9, RNU6-272P, MIR581, RN7SL801P, MIR4459, LINC01033, RPL37P25, GZMAP1, MIR449A, MIR449B, MIR449C, EMB, PARP8, ISL1, ITGA1, PELO, ITGA2, MOCS2, FST, NDUFS4, ARL15, HSPB3, SNX18, ESM1, GZMK, GZMA, CDC20B, GPX8, MCIDAS, CCNO, DHX29                                                                                                                                                                                                                                                                                                                                                                                                                                                                                                                                                                                                                                                                                                                                                                                                                                                                                                                                                                                                                                                                                                                                                                                                                                                                                                                                                                                                                                                                                                                                                                                                                                                                                                                                                                                                                                                                                                                                                                                                                                                                                                                                                                                                                                                                                                                                                                                                                                                                                                                                                                                                                                                                                                                                                                                                                                                                               |
| chr5 | 54592177  | 56160761  | M2            | MIR5687, RNF138P1, AK4P2, RNA5SP183, HNRNPH1P3, RNU6-299P, RPL17P22, RNA5SP184, RNA5SP185, PSMC1P4, RNU6ATAC2P, HMGN1P17, DHX29, SKIV2L2, PPAP2A, SLC38A9, DDX4, IL31RA, IL6ST, ANKRD55, MAP3K1                                                                                                                                                                                                                                                                                                                                                                                                                                                                                                                                                                                                                                                                                                                                                                                                                                                                                                                                                                                                                                                                                                                                                                                                                                                                                                                                                                                                                                                                                                                                                                                                                                                                                                                                                                                                                                                                                                                                                                                                                                                                                                                                                                                                                                                                                                                                                                                                                                                                                                                                                                                                                                                                                                                                                                                                                                                                                                                                                                                          |
| chr5 | 63256278  | 64769779  | M2            | RN7SL169P, RNU6-294P, MRPL49P1, RPEP1, HTR1A, RNF180, RGS7BP, FAM159B, SREK11P1, CWC27, ADAMTS6                                                                                                                                                                                                                                                                                                                                                                                                                                                                                                                                                                                                                                                                                                                                                                                                                                                                                                                                                                                                                                                                                                                                                                                                                                                                                                                                                                                                                                                                                                                                                                                                                                                                                                                                                                                                                                                                                                                                                                                                                                                                                                                                                                                                                                                                                                                                                                                                                                                                                                                                                                                                                                                                                                                                                                                                                                                                                                                                                                                                                                                                                          |
| chr5 | 65321675  | 67591152  | M11           | MAST4-IT1, MAST4-AS1, RNU6-1232P, EEF1B2P2, ERBB2IP, SREK1, MAST4, CD180, PIK3R1                                                                                                                                                                                                                                                                                                                                                                                                                                                                                                                                                                                                                                                                                                                                                                                                                                                                                                                                                                                                                                                                                                                                                                                                                                                                                                                                                                                                                                                                                                                                                                                                                                                                                                                                                                                                                                                                                                                                                                                                                                                                                                                                                                                                                                                                                                                                                                                                                                                                                                                                                                                                                                                                                                                                                                                                                                                                                                                                                                                                                                                                                                         |
| chr5 | 77684660  | 80724452  | M2            | FAM151B, ANKRD34B, DHFR, MTRNR2L2, MSH3, SCAMP1, RASGRF2, HMG81P21, RNY3P1, TRMT112P2, KRT18P45, RBMX2P5, HNRNPA1P12, RNU6-211P, RPL7P24, DBIP2, CKMT2-AS1, CKMT2, ZCCHC9, ACOT12, SSBP2, LHFPL2, ARSB, DMGDH, BHMT2, BHMT, JMY, HOMER1, PAPD4, CMYA5, MTX3, THBS4, SERINC5, SPZ1, ZFYVE16                                                                                                                                                                                                                                                                                                                                                                                                                                                                                                                                                                                                                                                                                                                                                                                                                                                                                                                                                                                                                                                                                                                                                                                                                                                                                                                                                                                                                                                                                                                                                                                                                                                                                                                                                                                                                                                                                                                                                                                                                                                                                                                                                                                                                                                                                                                                                                                                                                                                                                                                                                                                                                                                                                                                                                                                                                                                                               |
| chr5 | 80724452  | 81605975  | M14,M2        | SHFM1P1, ATG10-IT1, PPIAP11, ATG10-AS1, RN7SL378P, SSBP2, ATG10, RPS23, ATP6AP1L                                                                                                                                                                                                                                                                                                                                                                                                                                                                                                                                                                                                                                                                                                                                                                                                                                                                                                                                                                                                                                                                                                                                                                                                                                                                                                                                                                                                                                                                                                                                                                                                                                                                                                                                                                                                                                                                                                                                                                                                                                                                                                                                                                                                                                                                                                                                                                                                                                                                                                                                                                                                                                                                                                                                                                                                                                                                                                                                                                                                                                                                                                         |
| chr5 | 81605975  | 100222304 | M14,M16,M2    | PTP4A1P4, NBPF22P, MIR3607, RNU6-804P, RN7SKP3A, MIR4280, RN7SL629P, RNU6-606P, RNU6-727P, ERAP2, TMEM161B-AS1, RNA5SP187, RPS3AP22, LINC00461, MEF2C-AS1, ARRD3, LNPEP, MIR3660, RNU4-90P, LUCAT1, RAB5CP2, LIX1, PCBP2P3, R1OK2, LDHBP3, CCT7P2, POLD2P1, NR2F1-AS1, NR2F1, RGM8, CHD1, MIR2277, NPM1P27, FAM172A, MTND5P12, MTND6P3, RPL7P18, RNU6-308P, HSPD1P11, POU5F2, KIAA0825, FABP5P5, MIR583, RNU6-524P, SETP22, RNU1-73P, YTHDF1P1, ANKRD32, KRT8P32, MRPS35P2, CTBP2P4, RGM8-AS1, CSNK1A1P3, RNU6-402P, GUSBP8, EEF1A1P20, RPL5P16, MTND5P10, FAM174A, MTATP6P2, RNU6-1119P, ST8SIA4, RN7SKP62, MIR548P, ST13P12, SCARNA18, COQ10BP2, FTH1P9, VCAN-AS1, RN7SKP295, RNU6-620P, RNU6-448P, MCTP1, RBBP4P6, RPL5P17, RPS2P25, FAM81B, TTC37, ARSK, GPR150, RFESD, ATP6AP1L, TMEM167A, SPATA9, XRCC4, RHOBTB3, VCAN, GLRX, C5orf27, ELL2, PCSK1, HAPLN1, EDIL3, COX7C, RASA1, CAST, CCNH, TMEM161B, MEF2C, CETN3, MBLAC2, POLR3G, LYSMD3, GPR98, ERAP1                                                                                                                                                                                                                                                                                                                                                                                                                                                                                                                                                                                                                                                                                                                                                                                                                                                                                                                                                                                                                                                                                                                                                                                                                                                                                                                                                                                                                                                                                                                                                                                                                                                                                                                                                                                                                                                                                                                                                                                                                                                                                                                                                                                                                          |
| chr5 | 100222304 | 100231357 | M14,M16       | ST8SIA4                                                                                                                                                                                                                                                                                                                                                                                                                                                                                                                                                                                                                                                                                                                                                                                                                                                                                                                                                                                                                                                                                                                                                                                                                                                                                                                                                                                                                                                                                                                                                                                                                                                                                                                                                                                                                                                                                                                                                                                                                                                                                                                                                                                                                                                                                                                                                                                                                                                                                                                                                                                                                                                                                                                                                                                                                                                                                                                                                                                                                                                                                                                                                                                  |
| chr5 | 100231357 | 104435486 | M14,M16,M2    | ST8SIA4, RN7SL802P, OR7H2P, RNA5SP188, RN7SKP68, LINC00492, LINC00491, EIF3KP1, SLC04C1, SLC06A1, PAM, RNU1-140P, RN7SL255P, RNU6-334P, RAB9BP1, GIN1, PPIP5K2, C5orf30, NUDT12                                                                                                                                                                                                                                                                                                                                                                                                                                                                                                                                                                                                                                                                                                                                                                                                                                                                                                                                                                                                                                                                                                                                                                                                                                                                                                                                                                                                                                                                                                                                                                                                                                                                                                                                                                                                                                                                                                                                                                                                                                                                                                                                                                                                                                                                                                                                                                                                                                                                                                                                                                                                                                                                                                                                                                                                                                                                                                                                                                                                          |
| chr5 | 104435486 | 106714833 | M16,M2        | RAB9BP1, RNA5SP189, PSMC1P5, EFNA5                                                                                                                                                                                                                                                                                                                                                                                                                                                                                                                                                                                                                                                                                                                                                                                                                                                                                                                                                                                                                                                                                                                                                                                                                                                                                                                                                                                                                                                                                                                                                                                                                                                                                                                                                                                                                                                                                                                                                                                                                                                                                                                                                                                                                                                                                                                                                                                                                                                                                                                                                                                                                                                                                                                                                                                                                                                                                                                                                                                                                                                                                                                                                       |
| chr5 | 106714833 | 108717404 | M14,M16,M2    | RN7SL782P, RN7SKP122, LINC01023, RNU6-47P, GJA1P1, EFNA5, FBXL17, FER, PJA2                                                                                                                                                                                                                                                                                                                                                                                                                                                                                                                                                                                                                                                                                                                                                                                                                                                                                                                                                                                                                                                                                                                                                                                                                                                                                                                                                                                                                                                                                                                                                                                                                                                                                                                                                                                                                                                                                                                                                                                                                                                                                                                                                                                                                                                                                                                                                                                                                                                                                                                                                                                                                                                                                                                                                                                                                                                                                                                                                                                                                                                                                                              |
| chr5 | 108717404 | 109159423 | M14,M16       | KRT18P42, RN7SKP230, PJA2, MAN2A1                                                                                                                                                                                                                                                                                                                                                                                                                                                                                                                                                                                                                                                                                                                                                                                                                                                                                                                                                                                                                                                                                                                                                                                                                                                                                                                                                                                                                                                                                                                                                                                                                                                                                                                                                                                                                                                                                                                                                                                                                                                                                                                                                                                                                                                                                                                                                                                                                                                                                                                                                                                                                                                                                                                                                                                                                                                                                                                                                                                                                                                                                                                                                        |
| chr5 | 109159423 | 109202987 | M14,M16,M2    | MAN2A1                                                                                                                                                                                                                                                                                                                                                                                                                                                                                                                                                                                                                                                                                                                                                                                                                                                                                                                                                                                                                                                                                                                                                                                                                                                                                                                                                                                                                                                                                                                                                                                                                                                                                                                                                                                                                                                                                                                                                                                                                                                                                                                                                                                                                                                                                                                                                                                                                                                                                                                                                                                                                                                                                                                                                                                                                                                                                                                                                                                                                                                                                                                                                                                   |
| chr5 | 109202987 | 109756134 | M16,M2        | PGAM5P1, MAN2A1, TMEM232                                                                                                                                                                                                                                                                                                                                                                                                                                                                                                                                                                                                                                                                                                                                                                                                                                                                                                                                                                                                                                                                                                                                                                                                                                                                                                                                                                                                                                                                                                                                                                                                                                                                                                                                                                                                                                                                                                                                                                                                                                                                                                                                                                                                                                                                                                                                                                                                                                                                                                                                                                                                                                                                                                                                                                                                                                                                                                                                                                                                                                                                                                                                                                 |
| chr5 | 109756134 | 125696151 | M14,M16,M2    | SLC25A46, HMG81P22, RN7SKP117, GRAMD3, RPSAP37, TSLP, WDR36, CAMK4, STARD4, NREP, EPB41L4A, EPB41L4A-AS2, APC, MIR548F3, STARD4-AS1, HMGN1P13, RN7SKP57, HMGN1P14, NREP-AS1, EPB41L4A-AS1, SRP19, SNORA13, HMG83P16, CBX3P3, RNU6-482P, XBP1P1, RNU4ATAC13P, RN7SKP89, REEP5, TRIM36-IT1, HMGN1P15, AK3P4, CCT5P1, RNU2-49P, RNU6-644P, HMG2P27, RPS17P2, RPL35AP15, LINC00992, ZRSR1, RPL7L1P4, RNU7-34P, DCP2, PTMAP2, RNU6-373P, MCC, LAMTOR3P2, RNU6-701P, MIR5706, RN7SL174P, RNA5SP190, FABP5P6, RNU6-718P, TSSK1B, YTHDC2, RNU4-69P, ARGFXP1, RN7SL689P, RN7SL711P, KRT8P33, HMG83P17, KRT18P16, HMG81P29, LINC01170, KCNN2, TRIM36, PGGT1B, CCDC112, FEM1C, TICAM2, TMED7-TICAM2, TMED7, CDO1, ATG12, AP3S1, TMEM232, ARL14EPL, COMMD10, SEMA8A, DTWD2, DMXL1, TNFAIP8, HSD17B4, FAM170A, PRR16, FTMT, SRFBP1, LOX, ZNF474, SNCAIP, SNX2, SNX24, PPIIC, PRDM6, CEP120, CSNK1G3, ZNF608                                                                                                                                                                                                                                                                                                                                                                                                                                                                                                                                                                                                                                                                                                                                                                                                                                                                                                                                                                                                                                                                                                                                                                                                                                                                                                                                                                                                                                                                                                                                                                                                                                                                                                                                                                                                                                                                                                                                                                                                                                                                                                                                                                                                                                                                                           |
| chr5 | 125696151 | 125816399 | M14,M2        | GRAMD3                                                                                                                                                                                                                                                                                                                                                                                                                                                                                                                                                                                                                                                                                                                                                                                                                                                                                                                                                                                                                                                                                                                                                                                                                                                                                                                                                                                                                                                                                                                                                                                                                                                                                                                                                                                                                                                                                                                                                                                                                                                                                                                                                                                                                                                                                                                                                                                                                                                                                                                                                                                                                                                                                                                                                                                                                                                                                                                                                                                                                                                                                                                                                                                   |
| chr5 | 125816399 | 126386996 | M14           | GRAMD3, RNU6-963P, HSPE1P10, RNU6-752P, ALDH7A1, PHAX, C5orf48, LMNB1, MARCH3, C5orf63                                                                                                                                                                                                                                                                                                                                                                                                                                                                                                                                                                                                                                                                                                                                                                                                                                                                                                                                                                                                                                                                                                                                                                                                                                                                                                                                                                                                                                                                                                                                                                                                                                                                                                                                                                                                                                                                                                                                                                                                                                                                                                                                                                                                                                                                                                                                                                                                                                                                                                                                                                                                                                                                                                                                                                                                                                                                                                                                                                                                                                                                                                   |
| chr5 | 126386996 | 126705601 | M14,M2        | MRPS5P3, C5orf63, MEGF10                                                                                                                                                                                                                                                                                                                                                                                                                                                                                                                                                                                                                                                                                                                                                                                                                                                                                                                                                                                                                                                                                                                                                                                                                                                                                                                                                                                                                                                                                                                                                                                                                                                                                                                                                                                                                                                                                                                                                                                                                                                                                                                                                                                                                                                                                                                                                                                                                                                                                                                                                                                                                                                                                                                                                                                                                                                                                                                                                                                                                                                                                                                                                                 |
| chr5 | 126705601 | 128990126 | M14,M16,M2    | HNRNPKP1, KDELC1P1, MIR4633, MIR4460, ADAMTS19-AS1, MEGF10, PRRC1, CTXN3, SLC12A2, FBN2, SLC27A6, ISOC1, ADAMTS19                                                                                                                                                                                                                                                                                                                                                                                                                                                                                                                                                                                                                                                                                                                                                                                                                                                                                                                                                                                                                                                                                                                                                                                                                                                                                                                                                                                                                                                                                                                                                                                                                                                                                                                                                                                                                                                                                                                                                                                                                                                                                                                                                                                                                                                                                                                                                                                                                                                                                                                                                                                                                                                                                                                                                                                                                                                                                                                                                                                                                                                                        |
| chr5 | 128990126 | 129074376 | M14,M2        | ADAMTS19                                                                                                                                                                                                                                                                                                                                                                                                                                                                                                                                                                                                                                                                                                                                                                                                                                                                                                                                                                                                                                                                                                                                                                                                                                                                                                                                                                                                                                                                                                                                                                                                                                                                                                                                                                                                                                                                                                                                                                                                                                                                                                                                                                                                                                                                                                                                                                                                                                                                                                                                                                                                                                                                                                                                                                                                                                                                                                                                                                                                                                                                                                                                                                                 |
| chr5 | 129074376 | 131978731 | M14           | RNU6ATAC10P, RNA5SP191, HSPA8P4, RNU7-53P, ARL2BPP4, PDLIM4, P4HA2-AS1, MIR3936, SLC22A4, SLC22A5, C5orf56, IRF1, IL5, RAD50, ADAMTS19, KIAA1024L, CHSY3, HINT1, LYRM7, CDC42SE2, RAPGEF6, FNIP1, ACSL6, IL3, CSF2, P4HA2                                                                                                                                                                                                                                                                                                                                                                                                                                                                                                                                                                                                                                                                                                                                                                                                                                                                                                                                                                                                                                                                                                                                                                                                                                                                                                                                                                                                                                                                                                                                                                                                                                                                                                                                                                                                                                                                                                                                                                                                                                                                                                                                                                                                                                                                                                                                                                                                                                                                                                                                                                                                                                                                                                                                                                                                                                                                                                                                                                |
| chr5 | 149980641 | 150418786 | M2            | ZNF300P1, SYNPO, MYOZ3, RBM22, DCTN4, SMIM3, IRGM, ZNF300, GPX3, TNIP1                                                                                                                                                                                                                                                                                                                                                                                                                                                                                                                                                                                                                                                                                                                                                                                                                                                                                                                                                                                                                                                                                                                                                                                                                                                                                                                                                                                                                                                                                                                                                                                                                                                                                                                                                                                                                                                                                                                                                                                                                                                                                                                                                                                                                                                                                                                                                                                                                                                                                                                                                                                                                                                                                                                                                                                                                                                                                                                                                                                                                                                                                                                   |
| chr5 | 156693090 | 162864810 | M2            | RNU6-390P, RNU6-260P, RNU2-48P, MARK2P11, RNU4ATAC2P, GAPDHP40, RN7SL295P, MIR146A, MIR3142, GLRXP3, RNU6-164P, ARL2BPP5, MRP63P6, CYFIP2, FNDC9, ADAM19, NIPAL4, SOX30, C5orf52, THG1L, LSM11, CLINT1, EBF1, RNF145, UBLCP1, IL12B, ADRA1B, TTC1, PWWP2A, FABP6, CCNJL, C1QTNF2, C5orf54, SLU7, PTTG1, ATP10B, GABRB2, GABRA6, GABRA1, GABRG2, CCNG1                                                                                                                                                                                                                                                                                                                                                                                                                                                                                                                                                                                                                                                                                                                                                                                                                                                                                                                                                                                                                                                                                                                                                                                                                                                                                                                                                                                                                                                                                                                                                                                                                                                                                                                                                                                                                                                                                                                                                                                                                                                                                                                                                                                                                                                                                                                                                                                                                                                                                                                                                                                                                                                                                                                                                                                                                                    |
| chr5 | 171849419 | 176831305 | M2            | MIR5003, SNORA74B, CDC42P5, RPL7AP33, RNA5SP200, RNU6-500P, GAPDHP71, SUMO2P6, HIGD1AP3, MIR4634, NIFK2, ARL2BPP6, RN7SKP148, RNU6-226P, OR1X1P, MIR1271, RN7SL684P, MIR4281, ZNF346-IT1, RN7SL562P, SH3PX02B, NEURL1B, DUSP1, ERGIC1, RPL26L1, ATP6VOE1, CREBRF, BNI1P, NKX2-5, STC2, BOD1, CPEB4, C5orf47, MSX2, DRD1, SFXN1, HRH2, CPLX2, THOC3, FAM153B, SIMC1, KIAA1191, ARL10, NOP16, HIGD2A, CLTB, FAF2, RNF44, CDHR2, GPRIN1, SNCB, EIF4E1B, TSPAN17, UNC5A, HK3, UIMC1, ZNF346, FGFR4, NSD1, RAB24, MXD3, PRELID1, LMAN2, RGS14, SLC34A1, PFN3, F12, GRK6                                                                                                                                                                                                                                                                                                                                                                                                                                                                                                                                                                                                                                                                                                                                                                                                                                                                                                                                                                                                                                                                                                                                                                                                                                                                                                                                                                                                                                                                                                                                                                                                                                                                                                                                                                                                                                                                                                                                                                                                                                                                                                                                                                                                                                                                                                                                                                                                                                                                                                                                                                                                                       |
| chr5 | 176831305 | 176959077 | M2,M6         | PRR7-AS1, F12, GRK6, PRR7, DBN1, PDLIM7, DOK3, DDX41, FAM193B                                                                                                                                                                                                                                                                                                                                                                                                                                                                                                                                                                                                                                                                                                                                                                                                                                                                                                                                                                                                                                                                                                                                                                                                                                                                                                                                                                                                                                                                                                                                                                                                                                                                                                                                                                                                                                                                                                                                                                                                                                                                                                                                                                                                                                                                                                                                                                                                                                                                                                                                                                                                                                                                                                                                                                                                                                                                                                                                                                                                                                                                                                                            |
| chr5 | 176959077 | 178039546 | M2            | OR1X5P, SUDS3P1, GMCL1P1, RN7SL646P, FAM193B, TMED9, B4GALT7, FAM153A, PROP1, FAM153C, N4BP3, RMND5B, NHP2, HNRNPAB, PHYKPL, COL23A1, CLK4                                                                                                                                                                                                                                                                                                                                                                                                                                                                                                                                                                                                                                                                                                                                                                                                                                                                                                                                                                                                                                                                                                                                                                                                                                                                                                                                                                                                                                                                                                                                                                                                                                                                                                                                                                                                                                                                                                                                                                                                                                                                                                                                                                                                                                                                                                                                                                                                                                                                                                                                                                                                                                                                                                                                                                                                                                                                                                                                                                                                                                               |
| chr6 | 292100    | 292330    | M11,M2,M9     | DUSP22                                                                                                                                                                                                                                                                                                                                                                                                                                                                                                                                                                                                                                                                                                                                                                                                                                                                                                                                                                                                                                                                                                                                                                                                                                                                                                                                                                                                                                                                                                                                                                                                                                                                                                                                                                                                                                                                                                                                                                                                                                                                                                                                                                                                                                                                                                                                                                                                                                                                                                                                                                                                                                                                                                                                                                                                                                                                                                                                                                                                                                                                                                                                                                                   |
| chr6 | 292330    | 28499672  | M11,M14,M2,M9 | ACOT13, KDM1B, TDGF1P4, RNA5SP202, PSMC1P11, RMRPP2, MIR3691, HNRNPA1P37, RN7SL221P, BTN2A2, PKMP5, C6orf62, MIR5683, LY86-AS1, SNAPC5P1, CNN3P1, BTF3P7, RN7SL554P, HNRNPLP1, PIP5K1P1, HULC, RNU6ATAC21P, TFAP2A-AS1, LINC00518, MIR5689, MRPL48P1, RNA5SP203, ELOVL2-AS1, RNU1-64P, PRKRIRP5, DEK, SUMO2P12, RN7SKP293, RPL15P3, RNU1-11P, GFOD1-AS1, RPS4XP7, RN7SKP204, RNU7-91P, MRPL35P1, RNU7-133P, LINC01108, RNU6-793P, RN7SL332P, JARID2-AS1, RNU6-522P, RNU6-645P, ARPC3P5, MIR4639, MRPL42P2, RNU6-1114P, RPL7P26, SUMO2P13, RNU6-190P, RNA5SP204, RNU6-263P, MIR548A1, RPL5P20, RNA5SP205, KRT18P38, TBC1D7, UQCRF5P3, RNU6-801P, RN7SL128P, E2F3-IT1, RNU6-141P, RNU6-150P, CASC15, RN7SKP240, CASC14, RNU6-1060P, SPTLC1P2, HNRNPA1P58, RNU6-391P, KRT8P43, PPIAP29, ASS1P1, RN7SL334P, CMAHP, DSP, RNY5P5, KATNBL1P5, RNU6-987P, PRELID1P2, HIST1H2BPS1, HIST1H2APS1, HIST1H1PS2, LARP1P1, HIST1H1PS1, HIST1H2APS3, HIST1H2APS4, HIST1H3PS1, RNU6-1259P, BTN2A3P, RNU6-502P, HCG11, VN1R14P, GUSBP2, GMNN, LINC00240, TRNAI2, VN1R12P, VN1R13P, VN1R11P, RNU2-62P, MIR3143, VN1R10P, BTN3A1, ZNF204P, MCFD2P1, HNRNPA1P1, RNU6-471P, TRNAI6, RSL24D1P1, HIST1H4PS1, HIST1H2BPS2, RNU7-26P, OR2W6P, RPL2P1, OR2W4P, IQCB2P, OR2W2P, OR2B7P, OR2B8P, OR1F12, ZSCAN12P1, ZSCAN16-AS1, ZNF192P1, ZNF192P2, TOB2P1, RNU2-45P, COX11P1, OR2E1P, RNF144B, C6orf229, ID4, FAM65B, MBOAT1, SNRNP48, BTN3A3, GFOD1, BMP6, TXNDC5, SIRT5, BLOC1S5, TXNDC5, BLOC1S5, E2F3, EEF1E1-BLOC1S5, EEF1E1, CDKAL1, SLC35B3, NOL7, LRRC16A, BTN2A1, BTN1A1, RANBP9, HMGNA4, ABT1, SOX4, OFCC1, ZNF322, MCUR1, SCGN, PRL, HDGFL1, NRSN1, HIST1H2AA, HIST1H2BA, SLC17A4, HIST1H2BJ, RNF182, HIST1H2AG, TFAP2A, HIST1H2BK, HIST1H4I, HIST1H2AH, PRSS16, SLC17A1, CDCC2, CD83, JARID2, KAAG1, MRS2, GCNT2, SLC17A3, DTNBP1, GLD1D, POM121L2, ZNF391, ZNF184, HIST1H2BL, HIST1H2AL, GCNT6, HIST1H3H, HIST1H2AJ, HIST1H2B, HIST1H4J, HIST1H4K, C6orf52, HIST1H2BN, HIST1H2AK, HIST1H2AL, HIST1H1B, HIST1H3I, HIST1H4L, SLC17A2, HIST1H3J, HIST1H2AM, HIST1H2BO, OR2B2, OR2B6, TRIM38, HIST1H1A, PAK11P1, HIST1H3A, HIST1H4A, ZNF165, HIST1H4B, ZSCAN16, HIST1H3B, HIST1H2AB, HIST1H2BB, TMEM14C, HIST1H3C, HIST1H1C, MYLIP, GMPR, HFE, ALDH5A1, TMEM14B, ATXN1, ZKSCAN8, ZSCAN9, ZKSCAN4, SYCP2L, STMND1, KIAA0319, NKAP1, PGBD1, RBM24, ZSCAN31, CAP2, TDP2, ZKSCAN3, ZSCAN12, ZSCAN23, HIST1H4C, GPX6, HIST1H1T, HIST1H2BC, HIST1H2AC, GPX5, HIST1H1E, HIST1H2BD, HIST1H2BE, HIST1H4D, HIST1H3D, MAK, HIST1H2AD, RN7SL352P, GMDS-AS1, HMGN2P28, MIR4645, FAM8A1, HIST1H2BF, LINC01011, HIST1H4E, HTATSF1P2, FAM136BP, SERPINB8P1, RNA5SP201, TUBB2BP1, HIST1H2BG, GCM2, NUP153, ELOVL2, HIST1H2AE, HIST1H3E, HIST1H1D, SMIM13, HIST1H4F, ERVFRD-1, NEDD9, HIST1H4G, HIST1H3F, HIST1H2BH, HIST1H3G, HIST1H2BI, HIST1H4H, KIF13A, BTN3A2, TMEM170B, ADTRP, DUSP22, HIVEP1, EDN1, PHACTR1, IRF4, NHLRC1, TPMT, EXOC2, HUS1B, FOXQ1, FOXF2, FOXC1, GMDS, C6orf195, MYLK4, WRNIP1, SERPINB1, SERPINB9, SERPINB6, NQO2, RIPK1, BPHL, TUBB2A, TUBB2B, PSMG4, SLC22A23, PXDC1, FAM50B, PRPF4B, FAM217A, C6orf201, EC12, CDYL, RPP40, PPP1R3G, LYRM4, FARS2, NRN1, F13A1, LY86, RREB1, SSR1, CAGE1, R1OK1 |
| chr6 | 28499672  | 28547196  | M11,M14,M9    | GPX5, SCAND3                                                                                                                                                                                                                                                                                                                                                                                                                                                                                                                                                                                                                                                                                                                                                                                                                                                                                                                                                                                                                                                                                                                                                                                                                                                                                                                                                                                                                                                                                                                                                                                                                                                                                                                                                                                                                                                                                                                                                                                                                                                                                                                                                                                                                                                                                                                                                                                                                                                                                                                                                                                                                                                                                                                                                                                                                                                                                                                                                                                                                                                                                                                                                                             |
| chr6 | 28547196  | 28555112  | M11,M14       | SCAND3                                                                                                                                                                                                                                                                                                                                                                                                                                                                                                                                                                                                                                                                                                                                                                                                                                                                                                                                                                                                                                                                                                                                                                                                                                                                                                                                                                                                                                                                                                                                                                                                                                                                                                                                                                                                                                                                                                                                                                                                                                                                                                                                                                                                                                                                                                                                                                                                                                                                                                                                                                                                                                                                                                                                                                                                                                                                                                                                                                                                                                                                                                                                                                                   |
| chr6 | 28555112  | 28870779  | M14           | LINC00533, RPSAP2, RPL13P, ZNF90P2, HCG14, SCAND3, TRIM27                                                                                                                                                                                                                                                                                                                                                                                                                                                                                                                                                                                                                                                                                                                                                                                                                                                                                                                                                                                                                                                                                                                                                                                                                                                                                                                                                                                                                                                                                                                                                                                                                                                                                                                                                                                                                                                                                                                                                                                                                                                                                                                                                                                                                                                                                                                                                                                                                                                                                                                                                                                                                                                                                                                                                                                                                                                                                                                                                                                                                                                                                                                                |

|      |          |          |                   |                                                                                                                                                                                                                                                                                                                                                                                                                                                                                                                                                                                                                                                                                                                                                                                                                                                                                                                                                                                                                                                                                                                                                                                                                                                                                                                                                                                                                                                                                                                                                                                                                                                                                                                                                                                                                                                                                     |
|------|----------|----------|-------------------|-------------------------------------------------------------------------------------------------------------------------------------------------------------------------------------------------------------------------------------------------------------------------------------------------------------------------------------------------------------------------------------------------------------------------------------------------------------------------------------------------------------------------------------------------------------------------------------------------------------------------------------------------------------------------------------------------------------------------------------------------------------------------------------------------------------------------------------------------------------------------------------------------------------------------------------------------------------------------------------------------------------------------------------------------------------------------------------------------------------------------------------------------------------------------------------------------------------------------------------------------------------------------------------------------------------------------------------------------------------------------------------------------------------------------------------------------------------------------------------------------------------------------------------------------------------------------------------------------------------------------------------------------------------------------------------------------------------------------------------------------------------------------------------------------------------------------------------------------------------------------------------|
| chr6 | 28870779 | 31911957 | M11,M14           | LY6G5B, LY6G5C, ABHD16A, RNU6-930P, KRT18P1, RN7SL471P, HCG15, HCG16, OR2AD1P, OR2P1P, OR2N1P, OR2J4P, OR2H4P, OR2G1P, OR2U1P, OR2U2P, OR2B4P, DDX6P1, UBDP1, MAS1LP1, RPS17P1, LINC01015, GPR53P, OR21P, OR2H5P, TMEM183AP1, SNORD32B, RPL13AP, SUMO2P1, ZDHHC20P1, HCG4P11, HLA-F-AS1, RPL23AP1, MICE, HCG9P5, IFITM4P, HLA-V, HCG4, HLA-P, RPL7AP7, M1CG, HCG4P8, M1CF, HCG4P7, HLA-H, HLA-T, DDX39BP1, MCCD1P1, HCG4B, HLA-K, HLA-U, HCG4P5, HLA-W, M1CD, HCG9, DDX39BP2, MCCD1P2, ZNRD1-AS1, HCG4P3, HLA-J, ETR1P1, TRIM31-AS1, PAIP1P1, HCG17, TRIM26BP, HLA-L, HCG18, HLA-N, HCG19P, UBQLN1P1, M1CC, TMPOP1, SUCLA2P1, RANP1, MIR877, PTMAP1, RPL7P4, MDC1-AS1, RN7SL353P, HCG20, LINC00243, RN7SKP186, DDR1-AS1, MIR4640, RN7SL175P, HCG21, HCG22, RNU6-1133P, POLR2LP, PSORS1C3, USP8P1, RPL3P2, WASF5P, DHFRP2, RNU6-283P, FGFR3P1, ZDHHC20P2, HLA-S, HCP5, LINC01149, PPIAP9, RPL15P4, SNORD117, SNORD84, DDX39B-AS1, UQCRRHP1, SNORA38, C6orf47-AS1, MIR4646, RNU6-850P, SAPCD1-AS1, SNORD48, SNORD52, EHMT2-AS1, LY6G6F, LY6G6E, LY6G6D, C6orf25, LY6G6C, DDAH2, CLIC1, MSH5, MSH5-SAPCD1, SAPCD1, VWA7, VARS, LSM2, HSPA1L, HSPA1A, HSPA1B, C6orf48, NEU1, TRIM27, C6orf100, ZNF311, OR2W1, OR2B3, OR2J1, OR2J3, SLC44A4, OR2J2, OR14J1, OR5V1, EHMT2, OR12D3, OR12D2, OR12D1, OR11A1, OR10C1, OR2H1, MAS1L, UBD, GABBR1, C2, OR2H2, MOG, ZBTB12, CFB, ZFP57, HLA-F, HLA-G, HLA-A, ZNRD1, PPP1R11, RNF39, TRIM31, TRIM40, TRIM10, TRIM15, TRIM26, TRIM39, TRIM39-RPP21, RPP21, HLA-E, GNL1, PRR3, ABCF1, PPP1R10, MRPS18B, ATAT1, C6orf136, DHX16, PPP1R18, NRM, MDC1, TUBB, FLOT1, IER3, DDR1, GTF2H4, VARS2, SFTA2, DPCR1, MUC21, MUC22, C6orf15, PSORS1C1, CDSN, PSORS1C2, CCHCR1, TCF19, POU5F1, HCG27, HLA-C, HLA-B, MICA, MICB, MCCD1, ATP6V1G2-DDX39B, DDX39B, ATP6V1G2, NFKBIL1, LTA, TNF, LTB, LST1, NCR3, AIF1, PRRC2A, BAG6, APOM, C6orf47, GPANK1, CSNK2B |
| chr6 | 31911957 | 31928972 | M11,M14,M6        | MIR1236, C2, CFB, NELFE, SKIV2L                                                                                                                                                                                                                                                                                                                                                                                                                                                                                                                                                                                                                                                                                                                                                                                                                                                                                                                                                                                                                                                                                                                                                                                                                                                                                                                                                                                                                                                                                                                                                                                                                                                                                                                                                                                                                                                     |
| chr6 | 31928972 | 32011844 | M11,M14,M6,M9     | C4A-AS1, CYP21A1P, TNXA, STK19P, C4B-AS1, SKIV2L, DXO, STK19, C4A, C4B, CYP21A2, TNXB                                                                                                                                                                                                                                                                                                                                                                                                                                                                                                                                                                                                                                                                                                                                                                                                                                                                                                                                                                                                                                                                                                                                                                                                                                                                                                                                                                                                                                                                                                                                                                                                                                                                                                                                                                                               |
| chr6 | 32011844 | 32131017 | M11,M14,M9        | RNA5SP206, TNXB, ATF6B, FKBPL, PRRT1, PPT2, PPT2-EGFL8                                                                                                                                                                                                                                                                                                                                                                                                                                                                                                                                                                                                                                                                                                                                                                                                                                                                                                                                                                                                                                                                                                                                                                                                                                                                                                                                                                                                                                                                                                                                                                                                                                                                                                                                                                                                                              |
| chr6 | 32131017 | 32160307 | M11,M14,M6,M9     | PPT2, PPT2-EGFL8, EGFL8, AGPAT1, RNF5, AGER, PBX2, GPSM3                                                                                                                                                                                                                                                                                                                                                                                                                                                                                                                                                                                                                                                                                                                                                                                                                                                                                                                                                                                                                                                                                                                                                                                                                                                                                                                                                                                                                                                                                                                                                                                                                                                                                                                                                                                                                            |
| chr6 | 32160307 | 32160817 | M14,M6,M9         | GPSM3                                                                                                                                                                                                                                                                                                                                                                                                                                                                                                                                                                                                                                                                                                                                                                                                                                                                                                                                                                                                                                                                                                                                                                                                                                                                                                                                                                                                                                                                                                                                                                                                                                                                                                                                                                                                                                                                               |
| chr6 | 32160817 | 32163613 | M11,M14,M6,M9     | GPSM3, NOTCH4                                                                                                                                                                                                                                                                                                                                                                                                                                                                                                                                                                                                                                                                                                                                                                                                                                                                                                                                                                                                                                                                                                                                                                                                                                                                                                                                                                                                                                                                                                                                                                                                                                                                                                                                                                                                                                                                       |
| chr6 | 32163613 | 33170121 | M11,M14,M9        | HNRNPA1P2, RNU6-603P, HCG23, HLA-DRB9, RNU1-61P, HLA-DRB6, HLA-DQB1-AS1, MTCO3P1, HLA-DQB3, MIR3135B, TAPSAR1, PPP1R2P1, HLA-Z, BRD2-IT1, RPL32P1, HLA-DPA2, COL11A2P1, HLA-DPB2, HLA-DPA3, HCG24, RNY4P10, NOTCH4, C6orf10, BTNL2, HLA-DRA, HLA-DRB5, HLA-DRB1, HLA-DQA1, HLA-DQB1, HLA-DQA2, HLA-DQB2, HLA-DOB, TAP2, PSMB8, PSMB9, TAP1, HLA-DMB, HLA-DMA, BRD2, HLA-DOA, HLA-DPA1, HLA-DPB1, COL11A2, RXRB, SLC39A7                                                                                                                                                                                                                                                                                                                                                                                                                                                                                                                                                                                                                                                                                                                                                                                                                                                                                                                                                                                                                                                                                                                                                                                                                                                                                                                                                                                                                                                             |
| chr6 | 33170121 | 33180498 | M11,M14,M6,M9     | HSD17B8, RING1, MIR219-1, SLC39A7                                                                                                                                                                                                                                                                                                                                                                                                                                                                                                                                                                                                                                                                                                                                                                                                                                                                                                                                                                                                                                                                                                                                                                                                                                                                                                                                                                                                                                                                                                                                                                                                                                                                                                                                                                                                                                                   |
| chr6 | 33180498 | 33262753 | M14,M6,M9         | RING1, VPS52, ZNF70P1, HCG25, RPS18, B3GALT4, WDR46, PFDN6, RGL2                                                                                                                                                                                                                                                                                                                                                                                                                                                                                                                                                                                                                                                                                                                                                                                                                                                                                                                                                                                                                                                                                                                                                                                                                                                                                                                                                                                                                                                                                                                                                                                                                                                                                                                                                                                                                    |
| chr6 | 33262753 | 33382143 | M11,M14,M6,M9     | MYL8P, LYPLA2P1, RPL35AP4, RPL12P1, PFDN6, RGL2, TAPBP, ZBTB22, DAXX, KIFC1, PHF1                                                                                                                                                                                                                                                                                                                                                                                                                                                                                                                                                                                                                                                                                                                                                                                                                                                                                                                                                                                                                                                                                                                                                                                                                                                                                                                                                                                                                                                                                                                                                                                                                                                                                                                                                                                                   |
| chr6 | 33382143 | 33382253 | M11,M14,M6        | PHF1                                                                                                                                                                                                                                                                                                                                                                                                                                                                                                                                                                                                                                                                                                                                                                                                                                                                                                                                                                                                                                                                                                                                                                                                                                                                                                                                                                                                                                                                                                                                                                                                                                                                                                                                                                                                                                                                                |
| chr6 | 33382253 | 33400522 | M11,M14,M6,M9     | PHF1, CUTA, SYNGAP1                                                                                                                                                                                                                                                                                                                                                                                                                                                                                                                                                                                                                                                                                                                                                                                                                                                                                                                                                                                                                                                                                                                                                                                                                                                                                                                                                                                                                                                                                                                                                                                                                                                                                                                                                                                                                                                                 |
| chr6 | 33400522 | 37414066 | M11,M14,M9        | SNRPC, PNPLA1, C6orf222, UHRF1BP1, ETV7, TAF11, PXT1, KCTD20, ANKS1A, STK38, SRSF3, CDKN1A, TCP11, RAB44, CPNE5, PP1L1, MIR5004, RN7SL26P, LINC00336, MIR3934, LINC01016, MIR1275, KRT18P9, CYCSP55, RPL35P2, RPL7P25, RN7SL200P, HSP1P11, MIR5690, DPRXP2, RN7SL502P, RN7SL748P, MIR3925, RNU1-88P, LAP3P2, RPL12P2, RN7SL273P, C6orf89, P116, MTCH1, SCUBE3, ZNF76, FGD2, DEF6, COX6A1P2, PIM1, TMEM217, PPARD, FANCE, RPL10A, TBC1D22B, TEAD3, RNF8, TULP1, CMTR1, FKBP5, ARMC12, CLPSL2, CLPSL1, SYNGAP1, ZBTB9, BAK1, CLPS, LHFPL5, SRPK1, GGNBP1, ITPR3, SLC26A8, UQCC2, IP6K3, LEMD2, MAPK14, MLN, GRM4, MAPK13, HMGAI1, C6orf1, NUDT3, RPS10-NUDT3, RPS10, PACSIN1, SPDEF, BRPF3, C6orf106                                                                                                                                                                                                                                                                                                                                                                                                                                                                                                                                                                                                                                                                                                                                                                                                                                                                                                                                                                                                                                                                                                                                                                                  |
| chr6 | 37414066 | 38783433 | M11,M14,M2,M9     | MIR4462, RN7SL285P, RNU1-87P, BTBD9-AS1, RN7SL465P, CMTR1, CCDC167, MDGA1, ZFAND3, BTBD9, GLO1, DNAH8                                                                                                                                                                                                                                                                                                                                                                                                                                                                                                                                                                                                                                                                                                                                                                                                                                                                                                                                                                                                                                                                                                                                                                                                                                                                                                                                                                                                                                                                                                                                                                                                                                                                                                                                                                               |
| chr6 | 38783433 | 38790613 | M14,M2,M9         | DNAH8                                                                                                                                                                                                                                                                                                                                                                                                                                                                                                                                                                                                                                                                                                                                                                                                                                                                                                                                                                                                                                                                                                                                                                                                                                                                                                                                                                                                                                                                                                                                                                                                                                                                                                                                                                                                                                                                               |
| chr6 | 38790613 | 39835619 | M11,M14,M2,M9     | KIF6, DAAM2, ANKRD18EP, E2F4P1, RNU1-54P, DNAH8, GLP1R, SAYSD1, KCN5, KCN17, KCN16                                                                                                                                                                                                                                                                                                                                                                                                                                                                                                                                                                                                                                                                                                                                                                                                                                                                                                                                                                                                                                                                                                                                                                                                                                                                                                                                                                                                                                                                                                                                                                                                                                                                                                                                                                                                  |
| chr6 | 39835619 | 39836598 | M11,M14,M2        | DAAM2                                                                                                                                                                                                                                                                                                                                                                                                                                                                                                                                                                                                                                                                                                                                                                                                                                                                                                                                                                                                                                                                                                                                                                                                                                                                                                                                                                                                                                                                                                                                                                                                                                                                                                                                                                                                                                                                               |
| chr6 | 39836598 | 41753278 | M11,M14,M2,M9     | ADCY10P1, TREML3P, RNA5SP207, TREML5P, RNU6-643P, MIR4641, NPM1P51, DAAM2, MOCS1, TUBBP9, TDRG1, LINC00951, RNU6-250P, LRFN2, UNC5CL, OARD1, TSP02, APOBEC2, NFYA, TREML1, TREM2, TREML2, TREML4, TREML1, NCR2, FOXP4, MDFI, TFEF, PGC, FR33, PRICKLE4                                                                                                                                                                                                                                                                                                                                                                                                                                                                                                                                                                                                                                                                                                                                                                                                                                                                                                                                                                                                                                                                                                                                                                                                                                                                                                                                                                                                                                                                                                                                                                                                                              |
| chr6 | 41753278 | 41774749 | M11,M14,M9        | FR33, PRICKLE4, TOMM6, USP49                                                                                                                                                                                                                                                                                                                                                                                                                                                                                                                                                                                                                                                                                                                                                                                                                                                                                                                                                                                                                                                                                                                                                                                                                                                                                                                                                                                                                                                                                                                                                                                                                                                                                                                                                                                                                                                        |
| chr6 | 41774749 | 41839301 | M14,M9            | USP49                                                                                                                                                                                                                                                                                                                                                                                                                                                                                                                                                                                                                                                                                                                                                                                                                                                                                                                                                                                                                                                                                                                                                                                                                                                                                                                                                                                                                                                                                                                                                                                                                                                                                                                                                                                                                                                                               |
| chr6 | 41839301 | 42626472 | M11,M14,M9        | RNU6-761P, USP49, MED20, BYSL, CCND3, TAF8, C6orf132, GUCA1A, GUCA1B, MRPS10, TRERF1, UBR2                                                                                                                                                                                                                                                                                                                                                                                                                                                                                                                                                                                                                                                                                                                                                                                                                                                                                                                                                                                                                                                                                                                                                                                                                                                                                                                                                                                                                                                                                                                                                                                                                                                                                                                                                                                          |
| chr6 | 42626472 | 42627493 | M11,M9            | UBR2                                                                                                                                                                                                                                                                                                                                                                                                                                                                                                                                                                                                                                                                                                                                                                                                                                                                                                                                                                                                                                                                                                                                                                                                                                                                                                                                                                                                                                                                                                                                                                                                                                                                                                                                                                                                                                                                                |
| chr6 | 42627493 | 43469344 | M11,M14,M9        | DNPH1, RNU6-890P, ATP6V0CP3, RPL24P4, RN7SL403P, RPS2P28, RNU6-1113P, TTBK1, SLC22A7, CRIP3, ZNF318, ABCC10, DLK2, TJAP1, UBR2, PRPH2, TBCC, GLTSCR1L, RPL7L1, C6orf226, PTCRA, CNPY3, GNMT, PEX6, PPP2R5D, MEA1, KLHDC3, RRP36, CUL7, KLC4, MRPL2, PTK7, SRF, CUL9                                                                                                                                                                                                                                                                                                                                                                                                                                                                                                                                                                                                                                                                                                                                                                                                                                                                                                                                                                                                                                                                                                                                                                                                                                                                                                                                                                                                                                                                                                                                                                                                                 |
| chr6 | 43469344 | 43492290 | M11,M14,M6,M9     | TJAP1, LRRRC73, POLR1C, YIPF3, XPO5                                                                                                                                                                                                                                                                                                                                                                                                                                                                                                                                                                                                                                                                                                                                                                                                                                                                                                                                                                                                                                                                                                                                                                                                                                                                                                                                                                                                                                                                                                                                                                                                                                                                                                                                                                                                                                                 |
| chr6 | 43492290 | 44151441 | M11,M14,M9        | POLR1C, XPO5, POLH, GTPBP2, MAD2L1BP, RSPH9, MRPS18A, VEGFA, C6orf223, MRPL14, TMEM63B, CAPN11                                                                                                                                                                                                                                                                                                                                                                                                                                                                                                                                                                                                                                                                                                                                                                                                                                                                                                                                                                                                                                                                                                                                                                                                                                                                                                                                                                                                                                                                                                                                                                                                                                                                                                                                                                                      |
| chr6 | 44151441 | 44230347 | M11,M14,M2,M9     | MIR4647, HSP90A1, SLC35B2, NFKBIE, CAPN11, SLC29A1                                                                                                                                                                                                                                                                                                                                                                                                                                                                                                                                                                                                                                                                                                                                                                                                                                                                                                                                                                                                                                                                                                                                                                                                                                                                                                                                                                                                                                                                                                                                                                                                                                                                                                                                                                                                                                  |
| chr6 | 44230347 | 44233121 | M11,M2,M9         | NFKBIE                                                                                                                                                                                                                                                                                                                                                                                                                                                                                                                                                                                                                                                                                                                                                                                                                                                                                                                                                                                                                                                                                                                                                                                                                                                                                                                                                                                                                                                                                                                                                                                                                                                                                                                                                                                                                                                                              |
| chr6 | 44233121 | 44344210 | M11,M14,M2,M9     | NFKBIE, TMEM151B, TCTE1, AARS2, SPATS1                                                                                                                                                                                                                                                                                                                                                                                                                                                                                                                                                                                                                                                                                                                                                                                                                                                                                                                                                                                                                                                                                                                                                                                                                                                                                                                                                                                                                                                                                                                                                                                                                                                                                                                                                                                                                                              |
| chr6 | 44344210 | 44344771 | M14,M2,M9         | SPATS1                                                                                                                                                                                                                                                                                                                                                                                                                                                                                                                                                                                                                                                                                                                                                                                                                                                                                                                                                                                                                                                                                                                                                                                                                                                                                                                                                                                                                                                                                                                                                                                                                                                                                                                                                                                                                                                                              |
| chr6 | 44344771 | 46108959 | M11,M14,M2,M9     | MIR4642, NUDT19P4, MIR586, RNU6-515P, RNU6-754P, SPATS1, CDC5L, SUPT3H, RUNX2, CLIC5, ENPP4                                                                                                                                                                                                                                                                                                                                                                                                                                                                                                                                                                                                                                                                                                                                                                                                                                                                                                                                                                                                                                                                                                                                                                                                                                                                                                                                                                                                                                                                                                                                                                                                                                                                                                                                                                                         |
| chr6 | 46108959 | 46111012 | M11,M14,M2        | ENPP4                                                                                                                                                                                                                                                                                                                                                                                                                                                                                                                                                                                                                                                                                                                                                                                                                                                                                                                                                                                                                                                                                                                                                                                                                                                                                                                                                                                                                                                                                                                                                                                                                                                                                                                                                                                                                                                                               |
| chr6 | 46111012 | 53761626 | M11,M14,M2,M9     | DEFB133, DEFB114, DEFB113, DEFB110, DEFB112, ACTG1P9, TFAP2D, RN7SKP116, RNU1-105P, HNRNPA3P4, RBMXP1, RNU7-65P, EEF1A1P42, CYP2AC1P, RPS17P5, FTH1P5, RN7SL580P, MIR206, MIR133BHG, MIR133B, SLC25A20P1, TRAM2-AS1, GSTA7P, GSTA6P, RN7SK, RN7SL244P, RNU6-464P, SOD1P1, RNU1-136P, HMGB1P20, MIR5685, RPS16P5, RPL31P28, RPL31P33, RN7SKP256, NANOGP3, TFAP2B, PKHD1, IL17A, IL17F, MCM3, PAQR8, EFHC1, ENPP4, ENPP5, TRAM2, RCAN2, CYP39A1, SLC25A27, TMEM14A, GSTA2, GSTA1, TDRD6, PLA2G7, GSTA5, GSTA3, ANKRD66, MEP1A, GSTA4, GPR116, ICK, GPR110, FBXO9, TNFRSF21, CUD2AP, GCM1, ELOVL5, GPR111, GPR115, OPN5, GCLC, KLHL31, PTCHD4, MUT, LRRIC1, CENPO, GLYATL3, C6orf141, RHAG, CRISP2, CRISP3, PGK2, CRISP1                                                                                                                                                                                                                                                                                                                                                                                                                                                                                                                                                                                                                                                                                                                                                                                                                                                                                                                                                                                                                                                                                                                                                               |
| chr6 | 53761626 | 55966296 | M11,M14,M16,M2,M9 | MLIP-IT1, ERHP2, MLIP-AS1, CLNS1AP1, KRASP1, RNU6-1023P, NPM1P36, LRRIC1, MLIP, TINAG, FAM83B, HCRTR2, GFRAL, HMGCLL1, BMP5, COL21A1                                                                                                                                                                                                                                                                                                                                                                                                                                                                                                                                                                                                                                                                                                                                                                                                                                                                                                                                                                                                                                                                                                                                                                                                                                                                                                                                                                                                                                                                                                                                                                                                                                                                                                                                                |
| chr6 | 55966296 | 55988886 | M11,M16,M2,M9     | COL21A1                                                                                                                                                                                                                                                                                                                                                                                                                                                                                                                                                                                                                                                                                                                                                                                                                                                                                                                                                                                                                                                                                                                                                                                                                                                                                                                                                                                                                                                                                                                                                                                                                                                                                                                                                                                                                                                                             |
| chr6 | 55988886 | 58287724 | M11,M14,M16,M2,M9 | RCC2P7, RPL17P26, RNU6-626P, OSTCP6, FTH1P15, PRIM2, MIR548U, GAPDHP41, RBBP4P3, GUSBP4, POM12L14P, LINC00680, COL21A1, DST, BEND6, KIAA1586, ZNF451, BAG2, RAB23                                                                                                                                                                                                                                                                                                                                                                                                                                                                                                                                                                                                                                                                                                                                                                                                                                                                                                                                                                                                                                                                                                                                                                                                                                                                                                                                                                                                                                                                                                                                                                                                                                                                                                                   |
| chr6 | 58287724 | 62389864 | M14               | LINC00680, GAPDHP15, RBBP4P4, MTRNR2L9                                                                                                                                                                                                                                                                                                                                                                                                                                                                                                                                                                                                                                                                                                                                                                                                                                                                                                                                                                                                                                                                                                                                                                                                                                                                                                                                                                                                                                                                                                                                                                                                                                                                                                                                                                                                                                              |
| chr6 | 62389864 | 62995931 | M1,M14,M16,M2,M9  | KHDRBS2                                                                                                                                                                                                                                                                                                                                                                                                                                                                                                                                                                                                                                                                                                                                                                                                                                                                                                                                                                                                                                                                                                                                                                                                                                                                                                                                                                                                                                                                                                                                                                                                                                                                                                                                                                                                                                                                             |
| chr6 | 62995931 | 66115260 | M1,M16,M2,M9      | SPTLCP3, EEF1B2P5, RPL7AP34, RPL9P18, GCNT1P4, HNRNPD2, KHDRBS2, FKBP1C, LGSN, PTP4A1, PHF3, EYS                                                                                                                                                                                                                                                                                                                                                                                                                                                                                                                                                                                                                                                                                                                                                                                                                                                                                                                                                                                                                                                                                                                                                                                                                                                                                                                                                                                                                                                                                                                                                                                                                                                                                                                                                                                    |
| chr6 | 66115260 | 73023375 | M1,M16,M9         | SLC25A51P1, ADH5P4, NUFIP1P, RNU7-66P, RNA5SP208, RNU6-280P, NPM1P37, GAPDHP42, RPL37P15, RNU7-48P, SLC25A6P6, LYPLA1P3, RNU6-411P, LINC00472, MIR30C2, MIR30A, KRT19P1, RNU4-66P, EYS, BAI3, LMBRD1, COL19A1, COL9A1, FAM135A, C6orf57, SMAP1, B3GAT2, OGFRL1, RIMS1                                                                                                                                                                                                                                                                                                                                                                                                                                                                                                                                                                                                                                                                                                                                                                                                                                                                                                                                                                                                                                                                                                                                                                                                                                                                                                                                                                                                                                                                                                                                                                                                               |
| chr6 | 73023375 | 73843364 | M16,M9            | KCNQ5-IT1, MIR4282, KNOP1P4, PGAM1P10, RIMS1, KCNQ5                                                                                                                                                                                                                                                                                                                                                                                                                                                                                                                                                                                                                                                                                                                                                                                                                                                                                                                                                                                                                                                                                                                                                                                                                                                                                                                                                                                                                                                                                                                                                                                                                                                                                                                                                                                                                                 |
| chr6 | 73843364 | 73935175 | M16               | KCNQ5-AS1, KHDC1P1, KCNQ5, KHDC1L                                                                                                                                                                                                                                                                                                                                                                                                                                                                                                                                                                                                                                                                                                                                                                                                                                                                                                                                                                                                                                                                                                                                                                                                                                                                                                                                                                                                                                                                                                                                                                                                                                                                                                                                                                                                                                                   |
| chr6 | 74502348 | 74519706 | M17               | CD109                                                                                                                                                                                                                                                                                                                                                                                                                                                                                                                                                                                                                                                                                                                                                                                                                                                                                                                                                                                                                                                                                                                                                                                                                                                                                                                                                                                                                                                                                                                                                                                                                                                                                                                                                                                                                                                                               |
| chr6 | 74519706 | 75875495 | M16,M17           | TXNP7, CD109, COL12A1                                                                                                                                                                                                                                                                                                                                                                                                                                                                                                                                                                                                                                                                                                                                                                                                                                                                                                                                                                                                                                                                                                                                                                                                                                                                                                                                                                                                                                                                                                                                                                                                                                                                                                                                                                                                                                                               |
| chr6 | 75875495 | 75902071 | M16               | COL12A1                                                                                                                                                                                                                                                                                                                                                                                                                                                                                                                                                                                                                                                                                                                                                                                                                                                                                                                                                                                                                                                                                                                                                                                                                                                                                                                                                                                                                                                                                                                                                                                                                                                                                                                                                                                                                                                                             |
| chr6 | 76640669 | 84574047 | M16               | RNU6-248P, RNU6-261P, RPS6P7, HMGN3-AS1, DBIP1, GAPDHP63, RPL35AP18, AK4P5, RPL17P25, RNA5SP210, RNU6-130P, LAP3P1, IMPG1, HTR1B, MEI4, IRAK1BP1, PHIP, HMGN3, LCA5, SH3BGRL2, ELOVL4, TTK, BCKDHB, FAM46A, IBTK, TPBG, UBE3D, DOPEY1, PGM3, RWDD2A, MEI1, PRSS35, SNAP91, RIPPLY2, CYB5R4                                                                                                                                                                                                                                                                                                                                                                                                                                                                                                                                                                                                                                                                                                                                                                                                                                                                                                                                                                                                                                                                                                                                                                                                                                                                                                                                                                                                                                                                                                                                                                                          |

|      |           |           |                          |                                                                                                                                                                                                                                                                                                                                                                                                                                                                                                                                                                                                                                                                                                                                                                                                                                                                                                                                                                                                                                                                                                                                                                                                                                                                                                                                                                                                                                                                                                                             |
|------|-----------|-----------|--------------------------|-----------------------------------------------------------------------------------------------------------------------------------------------------------------------------------------------------------------------------------------------------------------------------------------------------------------------------------------------------------------------------------------------------------------------------------------------------------------------------------------------------------------------------------------------------------------------------------------------------------------------------------------------------------------------------------------------------------------------------------------------------------------------------------------------------------------------------------------------------------------------------------------------------------------------------------------------------------------------------------------------------------------------------------------------------------------------------------------------------------------------------------------------------------------------------------------------------------------------------------------------------------------------------------------------------------------------------------------------------------------------------------------------------------------------------------------------------------------------------------------------------------------------------|
| chr6 | 88852209  | 90024869  | M14                      | ACTBP8, RNU2-61P, RN7SL336P, TUBB3P1, CNR1, RNGTT, PNRC1, SRSF12, PM20D2, GABRR1, GABRR2                                                                                                                                                                                                                                                                                                                                                                                                                                                                                                                                                                                                                                                                                                                                                                                                                                                                                                                                                                                                                                                                                                                                                                                                                                                                                                                                                                                                                                    |
| chr6 | 144999541 | 147830523 | M16                      | GRM1, RAB32, ADGB, STXBP5, RNU1-33P, FUND2P3, RNA5SP222, RNU6-734P, KATNBL1P6, STXBP5-AS1, YAP1P1, SAMD5, UTRN, EPM2A, FBXO30, SHPRH                                                                                                                                                                                                                                                                                                                                                                                                                                                                                                                                                                                                                                                                                                                                                                                                                                                                                                                                                                                                                                                                                                                                                                                                                                                                                                                                                                                        |
| chr7 | 192968    | 4862185   | M2                       | CYP2W1, C7orf50, GPR146, GPER1, ZFAND2A, UNCX, MICALL2, INTS1, MAFK, TMEM184A, PSMG3, ELFN1, MAD1L1, FTSJ2, NUDT1, SNX8, EIF3B, CHST12, LFNG, BRAT1, IQCE, TTYH3, AMZ1, GNA12, CARD11, SDK1, FOXK1, AP5Z1, RADIL, FAM20C, PDGFA, PRKAR1B, HEATR2, SUN1, GET4, ADAP1, COX19, MIR339, PSMG3-AS1, TFAMP1, MIR4655, GRIFIN, MIR4648, RN7SKP130, CYP3A54P, MIR4656                                                                                                                                                                                                                                                                                                                                                                                                                                                                                                                                                                                                                                                                                                                                                                                                                                                                                                                                                                                                                                                                                                                                                               |
| chr7 | 6785718   | 6854394   | M2                       | RSPH10B2, CCZ1B, PMS2CL                                                                                                                                                                                                                                                                                                                                                                                                                                                                                                                                                                                                                                                                                                                                                                                                                                                                                                                                                                                                                                                                                                                                                                                                                                                                                                                                                                                                                                                                                                     |
| chr7 | 6854394   | 7222245   | M16,M2                   | CCZ1B, C1GALT1, OR7E39P, UNC93B2, OR7E136P, OR7E59P, ALG1L5P, FAM86LP, MIR3683                                                                                                                                                                                                                                                                                                                                                                                                                                                                                                                                                                                                                                                                                                                                                                                                                                                                                                                                                                                                                                                                                                                                                                                                                                                                                                                                                                                                                                              |
| chr7 | 7222245   | 7222348   | M1,M11,M16,M2,M9         | C1GALT1                                                                                                                                                                                                                                                                                                                                                                                                                                                                                                                                                                                                                                                                                                                                                                                                                                                                                                                                                                                                                                                                                                                                                                                                                                                                                                                                                                                                                                                                                                                     |
| chr7 | 7222348   | 7572543   | M1,M11,M14,M16,M2,M9     | C1GALT1, COL28A1                                                                                                                                                                                                                                                                                                                                                                                                                                                                                                                                                                                                                                                                                                                                                                                                                                                                                                                                                                                                                                                                                                                                                                                                                                                                                                                                                                                                                                                                                                            |
| chr7 | 7572543   | 20445794  | M11,M14,M16,M2,M9        | MIR1302-6, RN7SKP266, NPM1P13, MIR3146, RPL21P75, MACC1-AS1, COL28A1, MIOS, RPA3, RPA3-AS1, GLCC1, ICA1, NXPH1, NDUFA4, PHF14, THSD7A, TMEM106B, VWDE, SCIN, ARL4A, ETV1, DGKB, AGMO, MEOX2, ISPD, SOSTDC1, LRRC72, ANKMY2, BZW2, TSPAN13, AGR2, AGR3, AHR, SNX13, PRPS1L1, HDAC9, TWIST1, FERD3L, TWISTNB, TMEM196, MACC1, ITGB8, RPL23AP51, RNU6-534P, GAPDHP68, HSPA8P8, NPM1P11, TAS2R2P, RN7SKP228, RBMX2P4, RPL6P21, EEF1A1P26, RPL36AP26, RPL36AP29, ISPD-AS1, RAD17P1, RNMTL1P2                                                                                                                                                                                                                                                                                                                                                                                                                                                                                                                                                                                                                                                                                                                                                                                                                                                                                                                                                                                                                                     |
| chr7 | 20445794  | 20739758  | M14,M16,M2,M9            | EEF1A1P27, ITGB8, ABCB5                                                                                                                                                                                                                                                                                                                                                                                                                                                                                                                                                                                                                                                                                                                                                                                                                                                                                                                                                                                                                                                                                                                                                                                                                                                                                                                                                                                                                                                                                                     |
| chr7 | 20739758  | 23180563  | M14,M2,M9                | RPL23P8, LINC01162, RPS26P30, RN7SL542P, ASS1P11, RNU1-15P, MIR1183, RNA5SP227, EEF1A1P6, SNORD93, KLHL7-AS1, AK3P3, ABCB5, SP8, SP4, DNAH11, CDCA7L, RAPGEF5, STEAP1B, IL6, TOMM7, FAM126A, KLHL7                                                                                                                                                                                                                                                                                                                                                                                                                                                                                                                                                                                                                                                                                                                                                                                                                                                                                                                                                                                                                                                                                                                                                                                                                                                                                                                          |
| chr7 | 23180563  | 38807198  | M14,M2                   | EEPD1, KIAA0895, ANLN, AOA, ELMO1, RNU7-143P, RPS2P32, FCF1P1, PCMTD1P3, TPT1P7, RNA5SP228, RNU6-1103P, SUMO2P14, TSEN15P3, MIR148A, GPR141, EPDR1, NME8, RPL7AP38, HMG83P20, TPM3P4, NHP2P2, HOTAIRM1, SFRP4, STARD3NL, HOXA-AS2, TRGC2, TRGJ2, TRGC1, HOXA-AS3, TRGJ1, TRGJP, TRGJP1, TRGV11, HOXA10-AS, TRGV10, TRGV9, MIR196B, TRGV8, HOXA11-AS, TRGV5, TRGV4, TRGV3, TRGV2, TRGV1, AMPH, HOTTIP, EVX1-AS, RPL35P4, HNRNPA1P73, EIF4HP1, PSMC1P2, RN7SL365P, RNU6-979P, JAZF1-AS1, TRIL, NANOGP4, ZNRF2P2, TMSB4XP3, FAM183B, DPY19L2P3, MIR550A3, VPS41, RPS27P16, MIR550A1, SNX2P2, SLC25A5P5, DPY19L1P1, ZNRF2P1, MIR550A2, DPY19L1P2, RPP9, RNU6-388P, RN7SL505P, RNA5SP229, RNU6-438P, NPSR1-AS1, RPL7P31, NCAPD2P1, RN7SL132P, MIR548N, DPY19L2P1, S100A11P2, RNU6-1085P, SEPT7P3, MARK2P13, AOA-IT1, NPM1P18, MIR1200, ELMO1-AS1, RPS17P13, RNU6-565P, RPS10P14, NECAP1P1, TRGV6, TRGVA, TRGV7, TRGV6, TRGV5P, RN7SL83P, KRT8P20, KLHL7, NUPL2, GPNMB, MALSU1, IGF2BP3, TRA2A, CCDC126, FAM221A, STK31, NPY, MPP6, DFNAS, OSBPL3, CYCS, C7orf31, NPVF, NFE2L3, HNRNPA2B1, CBX3, SNX10, KIAA0087, C7orf71, SKAP2, HOXA1, HOXA2, HOXA3, HOXA4, HOXA5, HOXA6, HOXA7, HOXA9, HOXA10, HOXA11, HOXA13, EVX1, HIBADH, TAX1BP1, JAZF1, CREB5, CPVL, CHN2, PRR15, WIPF3, SCRNI, FKBP14, PLEKHA8, MTURN, ZNRF2, NOD1, GGCT, GARS, CRHR2, INMT, INMT-FAM188B, FAM188B, AQP1, GHRHR, ADCYAP1R1, NEUROD6, CCDC129, PPP1R17, PDE1C, LSM5, AVL9, KBTBD2, FKBP9, NT5C3A, RP9, BBS9, BMPER, NPSR1, DPY19L1, TBX20, HERPUD2, SEPT7 |
| chr7 | 38807198  | 38810797  | M14                      | VPS41                                                                                                                                                                                                                                                                                                                                                                                                                                                                                                                                                                                                                                                                                                                                                                                                                                                                                                                                                                                                                                                                                                                                                                                                                                                                                                                                                                                                                                                                                                                       |
| chr7 | 38810797  | 43832362  | M14,M2                   | VPS41, POU6F2, YAE1D1, RALA, CDK13, MPLKIP, SUGCT, INHBA, GLI3, C7orf25, PSM2, MRPL32, HECW1, POU6F2-AS2, POU6F2-AS1, LINC00265, RNU6-719P, CICIP22, STK17A, COA1, RWDD4P2, RN7SL496P, INHBA-AS1, HMGNP2P30, TCP1P1, HECW1-IT1, MIR3943, RNU7-35P, RNU6-575P, BLVRA                                                                                                                                                                                                                                                                                                                                                                                                                                                                                                                                                                                                                                                                                                                                                                                                                                                                                                                                                                                                                                                                                                                                                                                                                                                         |
| chr7 | 43832362  | 45717564  | M2                       | TUBG1P, POLR2J4, BLVRA, RASA4CP, URGCP-MRPS24, MRPS24, URGCP, UBE2D4, SPDYE1, LINC00957, MIR4649, RNA5SP230, RNU6-1097P, DBNL, MIR4657, SNHG15, SNORA5A, SNORA5C, SNORA5B, ELK1P1, PGAM2, POLM, AEBP1, POLD2, MYL7, GCK, YKT6, CAMK2B, NUDCD3, NPC1L1, DDXX5, TMED4, OGDH, ZMIZ2, PPIA, H2AFV, PURB, MYO1G, CCM2, NACAD, TBRG4, RAMP3, ADCY1                                                                                                                                                                                                                                                                                                                                                                                                                                                                                                                                                                                                                                                                                                                                                                                                                                                                                                                                                                                                                                                                                                                                                                                |
| chr7 | 45717564  | 55493034  | M14,M2                   | SEPT7P2, RNU6-241P, CIPC20, RNU6-326P, RNU7-76P, FTLP15, TTC4P1, HMGNP1P19, EPS15P1, MRPL42P4, LINC00525, GD12P1, RNU6-1091P, RPL7L1P2, CICIP17, ROBO2P1, RN7SL292P, HAUS6P1, RNU1-14P, RN7SKP218, RNU2-29P, SLC25A5P3, RNU6-1125P, RPL31P35, EGFR-AS1, CALM1P2, ADCY1, IGFBP1, IGFBP3, TNS3, C7orf65, HUS1, PKD1L1, C7orf69, SUN3, C7orf57, UPP1, ABCA13, VWC2, ZPBP, C7orf72, IKZF1, FIGL1, FIGL1, DDC, GRB10, COBL, POM121L12, VSTM2A, SEC61G, EGFR, LANCL2                                                                                                                                                                                                                                                                                                                                                                                                                                                                                                                                                                                                                                                                                                                                                                                                                                                                                                                                                                                                                                                              |
| chr7 | 55493034  | 55757153  | M2                       | CCDC42P2, TUBBP6, FKBP9L, RNU6-389P, LANCL2, VOPP1                                                                                                                                                                                                                                                                                                                                                                                                                                                                                                                                                                                                                                                                                                                                                                                                                                                                                                                                                                                                                                                                                                                                                                                                                                                                                                                                                                                                                                                                          |
| chr7 | 76751933  | 76958649  | M11                      | CCDC146, FGL2, GSAP                                                                                                                                                                                                                                                                                                                                                                                                                                                                                                                                                                                                                                                                                                                                                                                                                                                                                                                                                                                                                                                                                                                                                                                                                                                                                                                                                                                                                                                                                                         |
| chr7 | 76958649  | 77530027  | M11,M2                   | CCDC146, GSAP, PTPN12, RSBN1L, TMEM60, PHTF2, GCNT1P5, RSBN1L-AS1                                                                                                                                                                                                                                                                                                                                                                                                                                                                                                                                                                                                                                                                                                                                                                                                                                                                                                                                                                                                                                                                                                                                                                                                                                                                                                                                                                                                                                                           |
| chr7 | 77530027  | 77572016  | M11,M2,M9                | PHTF2                                                                                                                                                                                                                                                                                                                                                                                                                                                                                                                                                                                                                                                                                                                                                                                                                                                                                                                                                                                                                                                                                                                                                                                                                                                                                                                                                                                                                                                                                                                       |
| chr7 | 77572016  | 86595291  | M11,M16,M2,M9            | PHTF2, MAGI2, GNAI1, CD36, GNA13, SEMA3C, HGF, RPL13AP17, MAGI2-IT1, MAGI2-AS1, MAGI2-AS2, RNU6-337P, RNU6-530P, MAGI2-AS3, RNA5SP234, RNU6-849P, RN7SL869P, RN7SL35P, SNRPBP1, MIR1255B1, MTHFD2P5, RNA5SP235, RAD23BP2, RPL7P30, HMGNP2P11, HNRNPA1P8, HSPA8P16, LINC00972, SOCS5P1, CACNA2D1, PCLO, SEMA3E, SEMA3A, SEMA3D, GRM3, KIAA1324L                                                                                                                                                                                                                                                                                                                                                                                                                                                                                                                                                                                                                                                                                                                                                                                                                                                                                                                                                                                                                                                                                                                                                                              |
| chr7 | 86595291  | 91843205  | M11,M2                   | TP53T1G1, HNRNPA1P9, EIF4A1P13, PQLC1P1, EEF1A1P28, RNU6-274P, STEAP1-AS1, DPY19L2P4, TYP23CP1, PTP4A1P3, NIPA2P1, MIR1285-1, KIAA1324L, DMTF1, TMEM243, CROT, ABCB4, ABCB1, RUNCDC3B, SLC25A40, DBF4, ADAM22, SRI, STEAP4, ZNF804B, C7orf62, STEAP1, STEAP2, C7orf63, GTPBP10, CLDN12, CDK14, FZD1, MTERF, AKAP9, CYP51A1, LRRD1, KRIT1                                                                                                                                                                                                                                                                                                                                                                                                                                                                                                                                                                                                                                                                                                                                                                                                                                                                                                                                                                                                                                                                                                                                                                                    |
| chr7 | 91843205  | 92861652  | M11,M2,M9                | TMBIM7P, RNU6-10P, RN7SL7P, KRIT1, ANKIB1, GATAD1, ERVW-1, PEX1, RBM48, FAM133B, CDK6, SAMD9, SAMD9L, HEPACAM2                                                                                                                                                                                                                                                                                                                                                                                                                                                                                                                                                                                                                                                                                                                                                                                                                                                                                                                                                                                                                                                                                                                                                                                                                                                                                                                                                                                                              |
| chr7 | 92861652  | 93065372  | M11,M16,M2,M9            | CCDC132, CALCR                                                                                                                                                                                                                                                                                                                                                                                                                                                                                                                                                                                                                                                                                                                                                                                                                                                                                                                                                                                                                                                                                                                                                                                                                                                                                                                                                                                                                                                                                                              |
| chr7 | 93065372  | 93536047  | M11,M14,M16,M2,M9        | MIR653, MIR489, MIR4652, NDUFAF4P2, CALCR, GNGT1, TFP12                                                                                                                                                                                                                                                                                                                                                                                                                                                                                                                                                                                                                                                                                                                                                                                                                                                                                                                                                                                                                                                                                                                                                                                                                                                                                                                                                                                                                                                                     |
| chr7 | 93536047  | 94029507  | M11,M14,M16,M17,M2,M9    | GNGT1, GNG11, BET1, COL1A2                                                                                                                                                                                                                                                                                                                                                                                                                                                                                                                                                                                                                                                                                                                                                                                                                                                                                                                                                                                                                                                                                                                                                                                                                                                                                                                                                                                                                                                                                                  |
| chr7 | 94029507  | 94055842  | M1,M11,M14,M16,M17,M2,M9 | COL1A2                                                                                                                                                                                                                                                                                                                                                                                                                                                                                                                                                                                                                                                                                                                                                                                                                                                                                                                                                                                                                                                                                                                                                                                                                                                                                                                                                                                                                                                                                                                      |
| chr7 | 94055842  | 94139529  | M11,M14,M16,M17,M2,M9    | RNU6-1328P, COL1A2, CASD1                                                                                                                                                                                                                                                                                                                                                                                                                                                                                                                                                                                                                                                                                                                                                                                                                                                                                                                                                                                                                                                                                                                                                                                                                                                                                                                                                                                                                                                                                                   |
| chr7 | 94139529  | 94157562  | M11,M14,M16,M2,M9        | CASD1                                                                                                                                                                                                                                                                                                                                                                                                                                                                                                                                                                                                                                                                                                                                                                                                                                                                                                                                                                                                                                                                                                                                                                                                                                                                                                                                                                                                                                                                                                                       |
| chr7 | 94157562  | 97501308  | M11,M14,M2,M9            | RPS3AP25, RNU6-956P, ATP5F1P2, GRPEL2P3, RN7SKP129, ARF1P1, RNU4-16P, MIR591, RNU6-532P, RNU6-364P, RNU7-188P, MARK2P10, RN7SL252P, DLX6-AS1, DLX6-AS2, HMG83P21, RN7SKP104, CASD1, SGCE, PEG10, PPP1R9A, PON1, PON3, PON2, ASB4, PDK4, DYNC111, SLC25A13, SHFM1, C7orf76, DLX6, DLX5, ACN9, TAC1, ASNS                                                                                                                                                                                                                                                                                                                                                                                                                                                                                                                                                                                                                                                                                                                                                                                                                                                                                                                                                                                                                                                                                                                                                                                                                     |
| chr7 | 97501308  | 97501854  | M11,M14,M9               | ASNS                                                                                                                                                                                                                                                                                                                                                                                                                                                                                                                                                                                                                                                                                                                                                                                                                                                                                                                                                                                                                                                                                                                                                                                                                                                                                                                                                                                                                                                                                                                        |
| chr7 | 97501854  | 97601542  | M14,M9                   | OR7E7P, MIR5692A1, MIR5692A2, MIR5692C2, OR7E38P, RPS3AP29, ASNS                                                                                                                                                                                                                                                                                                                                                                                                                                                                                                                                                                                                                                                                                                                                                                                                                                                                                                                                                                                                                                                                                                                                                                                                                                                                                                                                                                                                                                                            |
| chr7 | 97601542  | 97616468  | M9                       | OCM2                                                                                                                                                                                                                                                                                                                                                                                                                                                                                                                                                                                                                                                                                                                                                                                                                                                                                                                                                                                                                                                                                                                                                                                                                                                                                                                                                                                                                                                                                                                        |
| chr7 | 99673208  | 99755513  | M6                       | MIR25, MIR93, MIR106B, RPL7P60, MIR4658, ZNF3, COPS6, MCM7, AP4M1, TAF6, CNPY4, MBLAC1, LAMTOR4, C7orf43                                                                                                                                                                                                                                                                                                                                                                                                                                                                                                                                                                                                                                                                                                                                                                                                                                                                                                                                                                                                                                                                                                                                                                                                                                                                                                                                                                                                                    |
| chr7 | 100468038 | 100491329 | M6                       | TRIP6, SRRT, UFPS1, ACHE                                                                                                                                                                                                                                                                                                                                                                                                                                                                                                                                                                                                                                                                                                                                                                                                                                                                                                                                                                                                                                                                                                                                                                                                                                                                                                                                                                                                                                                                                                    |
| chr7 | 102312090 | 102389398 | M14                      | RASA4DP                                                                                                                                                                                                                                                                                                                                                                                                                                                                                                                                                                                                                                                                                                                                                                                                                                                                                                                                                                                                                                                                                                                                                                                                                                                                                                                                                                                                                                                                                                                     |
| chr7 | 102389398 | 104909477 | M11,M14,M2               | RNU6-1136P, RN7SKP198, NFE4, CRYZP1, RPL19P12, DPY19L2P2, S100A11P1, RN7SKP86, EIF4BP6, LHFFL3-AS1, RN7SL8P, LINC01004, KMT2E-AS1, FAM185A, FBXL13, LRRC12, ARMC10, NAPEPLD, PMPCB, DNAJC2, PSMC2, SLC26A5, RELN, ORC5, LHFFL3, KMT2E, SRPK2                                                                                                                                                                                                                                                                                                                                                                                                                                                                                                                                                                                                                                                                                                                                                                                                                                                                                                                                                                                                                                                                                                                                                                                                                                                                                |
| chr7 | 104909477 | 105099706 | M14,M2                   | RWDD4P1, RNU6-1322P, SRPK2, PUS7                                                                                                                                                                                                                                                                                                                                                                                                                                                                                                                                                                                                                                                                                                                                                                                                                                                                                                                                                                                                                                                                                                                                                                                                                                                                                                                                                                                                                                                                                            |
| chr7 | 105099706 | 105516823 | M14                      | YBX1P2, PUS7, RINT1, EFCAB10, ATXN7L1                                                                                                                                                                                                                                                                                                                                                                                                                                                                                                                                                                                                                                                                                                                                                                                                                                                                                                                                                                                                                                                                                                                                                                                                                                                                                                                                                                                                                                                                                       |
| chr7 | 105516823 | 105603656 | M11,M14                  | ATXN7L1, CDHR3                                                                                                                                                                                                                                                                                                                                                                                                                                                                                                                                                                                                                                                                                                                                                                                                                                                                                                                                                                                                                                                                                                                                                                                                                                                                                                                                                                                                                                                                                                              |
| chr7 | 105603656 | 107571800 | M11,M14,M2               | DCAF13P1, RNU6-392P, LARP1BP2, RNA5SP236, WBP1LP2, BANF1P5, SLC26A4-AS1, PIGCP2, CDHR3, SYPL1, NAMPT, CCDC71L, PIK3CG, PRKAR2B, HBP1, COG5, GPR22, DUS4L, BCAP29, SLC26A4, CBLL1, SLC26A3, DLD, LAMB1                                                                                                                                                                                                                                                                                                                                                                                                                                                                                                                                                                                                                                                                                                                                                                                                                                                                                                                                                                                                                                                                                                                                                                                                                                                                                                                       |
| chr7 | 107571800 | 127569382 | M11,M14,M16,M2           | LAMB4, NRCAM, PNPLA8, THAP5, DNAJB9, C7orf66, IMMP2L, LRRN3, DOCK4, RPL7P32, EIF3IP1, RPL3P8, DOCK4-AS1, RNA5SP237, RN7SKP187, MTND5P8, NPM1P14, MIPEPP1, RNA5SP238, MIR3666, RAC1P6, RNA5SP239, ST7-AS1, TPM3P1, ST7-AS2, ZNF277, IFRD1, MTND4P6, RNU6-581P, RNA5SP240, HMGNP1P18, RNA5SP241, RNU6-517P, CYCSP19, RN7SKP277, PNPT1P2, LSMEM1, RNU7-154P, FEZF1-AS1, TMEM168, RPS26P31, LYPLA1P1, RNU6-296P, RNU6-11P, HYALP1, C7orf60, GPR85, SSU72P8, LINC00998, PPP1R3A, RNU6-102P, POT1-AS1, EEF1GP1, FOXP2, MIR592, MDFIC, TFE, TES, CAV2, CAV1, MET, CAPZA2, ST7, ST7-OT4, WNT2, AS21, CFTR, CTTNBP2, NAA38, ANKRD7, KCND2, TSPAN12, ING3, CPED1, WNT16, FAM3C, PTPR21, AASS, FEZF1, CADPS2, RNF133, RNF148, TAS2R16, SLC13A1, IQUB, NDUFA5, ASB15, LMOD2, WASL, HAL4, SPAM1, TMEM229A, GPR37, POT1, GRM8, ZNF800, GCC1, ARF5, FSCN3, PAX4, SND1, DLD, LAMB1                                                                                                                                                                                                                                                                                                                                                                                                                                                                                                                                                                                                                                                          |
| chr7 | 127569382 | 127630999 | M14,M2                   | SND1                                                                                                                                                                                                                                                                                                                                                                                                                                                                                                                                                                                                                                                                                                                                                                                                                                                                                                                                                                                                                                                                                                                                                                                                                                                                                                                                                                                                                                                                                                                        |
| chr7 | 127630999 | 127732351 | M11,M14,M2               | MIR593, SND1, LRRC4                                                                                                                                                                                                                                                                                                                                                                                                                                                                                                                                                                                                                                                                                                                                                                                                                                                                                                                                                                                                                                                                                                                                                                                                                                                                                                                                                                                                                                                                                                         |

|      |           |           |               |                                                                                                                                                                                                                                                                                                                                                                                                                                                                                                                                                                                                                                                                                                                                                                                                                                                                                                                                                                                                                                                                                                                                                                                                                                                                                                                                                                                                                                                                                                                                                                                                                                                                                                                                                                                                                                                                                                                                                                                                                                                                                                                                                                                                           |
|------|-----------|-----------|---------------|-----------------------------------------------------------------------------------------------------------------------------------------------------------------------------------------------------------------------------------------------------------------------------------------------------------------------------------------------------------------------------------------------------------------------------------------------------------------------------------------------------------------------------------------------------------------------------------------------------------------------------------------------------------------------------------------------------------------------------------------------------------------------------------------------------------------------------------------------------------------------------------------------------------------------------------------------------------------------------------------------------------------------------------------------------------------------------------------------------------------------------------------------------------------------------------------------------------------------------------------------------------------------------------------------------------------------------------------------------------------------------------------------------------------------------------------------------------------------------------------------------------------------------------------------------------------------------------------------------------------------------------------------------------------------------------------------------------------------------------------------------------------------------------------------------------------------------------------------------------------------------------------------------------------------------------------------------------------------------------------------------------------------------------------------------------------------------------------------------------------------------------------------------------------------------------------------------------|
| chr7 | 127732351 | 137790175 | M11,M2        | AGBL3, C7orf49, TMEM140, WDR91, STRA8, CNOT4, NUP205, C7orf73, SLC13A4, FAM180A, MTPN, LUZP6, CHR2M, PTN, DGKI, CREB3L2, AKR1D1, MIR129-1, RNU7-27P, RNU7-54P, RNU6-177P, C1P14, IMP3P2, RNA5SP242, RNA5SP243, RN7SL81P, KCF, RN7SL306P, ODCP, TP1P2, CYCS2P, RNU7-16P, SNRPGP3, RNU1-72P, RNA5SP244, MIR182, MIR96, MIR183, RNA5SP245, MIR335, RNA5SP246, MIR29B1, MIR29A, LINC-PINT, RNU6-1010P, MKLN1-AS, COX5BP3, TUBB3P2, SDHDP2, RNU6-1154P, RNU6-223P, PSMC1P3, MIR490, KR78P51, RN7SKP223, SND1, LEP, RBM28, PRRT4, IMPDH1, HILPDA, METTL2B, FAM71F2, FAM71F1, CALU, OPN1SW, CCDC136, FLNC, ATP6V1F, IRF5, TNPO3, TSPAN33, SMO, AHYCL2, STRIP2, SMKR1, NRF1, UBE2H, ZC3HC1, KLHDC10, TMEM209, SSMEM1, CPA2, CPA4, CPA5, CPA1, CEP41, MEST, COPG2, TSGA13, KLF14, MKLN1, PODXL, PLXNA4, CHCHD3, EXOC4, LRUGK, SLC35B4, AKR1B1, AKR1B1B, AKR1B1C, AKR1B1D, AKR1B1E, BPGM, CALD1                                                                                                                                                                                                                                                                                                                                                                                                                                                                                                                                                                                                                                                                                                                                                                                                                                                                                                                                                                                                                                                                                                                                                                                                                                                                                                                     |
| chr7 | 137790175 | 138554395 | M11           | AKR1D1, TRIM24, SVOPL, ATP6V0A4, TMEM213, KIAA1549, RCC2P3, MIR4468, UQCRR5P12                                                                                                                                                                                                                                                                                                                                                                                                                                                                                                                                                                                                                                                                                                                                                                                                                                                                                                                                                                                                                                                                                                                                                                                                                                                                                                                                                                                                                                                                                                                                                                                                                                                                                                                                                                                                                                                                                                                                                                                                                                                                                                                            |
| chr7 | 138554395 | 140507759 | M11,M14       | KDM7A, SLC37A3, RAB19, MKRN1, DENND2A, ADOCK2, NDUFB2, BRAF, KIAA1549, ZC3HAV1L, ZC3HAV1, TTC26, UBN2, C7orf55, C7orf55-LUC7L2, LUC7L2, KLRG2, CLEC2L, HIPK2, TBXAS1, PAPP1, RNU6-1272P, RNU6-206P, RNU6-911P, ERHP1, JHDM1D-AS1, RNU6-797P, RNU1-58P, PPP1R2P6, RNA5SP247, RNA5SP248, RN7SL771P, NDUFB2-AS1                                                                                                                                                                                                                                                                                                                                                                                                                                                                                                                                                                                                                                                                                                                                                                                                                                                                                                                                                                                                                                                                                                                                                                                                                                                                                                                                                                                                                                                                                                                                                                                                                                                                                                                                                                                                                                                                                              |
| chr7 | 140507759 | 141301080 | M11,M14,M2    | CCT4P1, RNU4-74P, BRAF, MRPS33, TMEM178B, AGK                                                                                                                                                                                                                                                                                                                                                                                                                                                                                                                                                                                                                                                                                                                                                                                                                                                                                                                                                                                                                                                                                                                                                                                                                                                                                                                                                                                                                                                                                                                                                                                                                                                                                                                                                                                                                                                                                                                                                                                                                                                                                                                                                             |
| chr7 | 141301080 | 141310994 | M14,M2        | AGK                                                                                                                                                                                                                                                                                                                                                                                                                                                                                                                                                                                                                                                                                                                                                                                                                                                                                                                                                                                                                                                                                                                                                                                                                                                                                                                                                                                                                                                                                                                                                                                                                                                                                                                                                                                                                                                                                                                                                                                                                                                                                                                                                                                                       |
| chr7 | 141310994 | 142638500 | M11,M14,M2    | WEE2-AS1, RNU1-82P, TAS2R6, MTND2P5, MTND1P3, MYL6P4, OR9A3P, OR9A1P, OR9N1P, MOXD2P, PRSS3P3, TRBV1, TRBV7-5, TRBV12-2, TRBV11-2, TRBV12-1, TRBV8-2, TRBV5-2, TRBV8-1, TRBV21-1, TRBV22-1, TRBV4, TRBV26, TRBV8, PGBD4P1, PRSS3P1, PRSS3P2, WBP1LP1, AGK, KIAA1147, WEE2, SSBP1, TAS2R3, TAS2R4, TAS2R5, PRSS37, MGAM, OR9A4, CLEC5A, TAS2R38, PRSS58, TRBV2, TRBV31, TRBV4-1, TRBV5-1, TRBV6-1, TRBV7-1, TRBV4-2, TRBV7-8, TRBV6-9, TRBV5-7, TRBV7-7, TRBV6-8, TRBV6-7, TRBV6-6, TRBV6-7, TRBV5-5, TRBV6-6, TRBV5-4, TRBV7-4, TRBV5-5, TRBV6-6, TRBV5-4, TRBV11-1, TRBV10-1, TRBV9, TRBV5-3, TRBV7-3, TRBV6-4, TRBV19, TRBV20-1, TRBV23-1, TRBV24-1, MTRNR2L6, TRBV25-1, TRBV27, TRBV28, TRBV29-1, PRSS1, TRBJ2-1, TRBJ2-2, TRBJ2-2P, TRBJ2-3, TRBJ2-4, TRBJ25, TRBJ2-6, TRBJ2-7, TRBC2, TRBV30, EPHB6, TRPV6, TRPV5, C7orf34, KEL                                                                                                                                                                                                                                                                                                                                                                                                                                                                                                                                                                                                                                                                                                                                                                                                                                                                                                                                                                                                                                                                                                                                                                                                                                                                                                                                                                      |
| chr7 | 142638500 | 142639520 | M14,M2        | KEL                                                                                                                                                                                                                                                                                                                                                                                                                                                                                                                                                                                                                                                                                                                                                                                                                                                                                                                                                                                                                                                                                                                                                                                                                                                                                                                                                                                                                                                                                                                                                                                                                                                                                                                                                                                                                                                                                                                                                                                                                                                                                                                                                                                                       |
| chr7 | 142639520 | 148513870 | M11,M14,M2    | OR9A2, OR6V1, PIP, TAS2R39, TAS2R40, GSTK1, TMEM139, OR9P1P, OR6W1P, RN7SL535P, RN7SL481P, HINT1P1, CASP2, EPHA1-AS1, TAS2R62P, OR2R1P, PAICSP5, CLCN1, CTAGE15, RNU6-162P, FAM115B, RNU6-267P, PAICSP6, FAM115D, OR2Q1P, SLC16A1P1, OR2A41P, OR2A15P, OR2A13P, OR2A3P, FAM131B, OR2A01P, OR2A20P, OR2A1-AS1, ZYX, ARHGEP34P, OR2A9P, RNU6ATAC40P, EEF1A1P10, RN7SKP174, EI24P4, RPL7P59, RN7SL207P, DUTP3, RANP2, MIR548F4, RNU6-1184P, RNA5SP249, RN7SL456P, RN7SL72P, EPHA1, TAS2R60, TAS2R41, OR10AC1P, FAM115C, CTAGE6, FAM115A, OR2F2, OR2F1, OR6B1, OR2A5, OR2A25, OR2A12, OR2A2, OR2A14, CTAGE4, ARHGEP35, OR2A42, OR2A7, CTAGE8, OR2A1, ARHGEP5, NOBOX, TPK1, CNTNAP2, C7orf33, CUL1, E2H2, KEL                                                                                                                                                                                                                                                                                                                                                                                                                                                                                                                                                                                                                                                                                                                                                                                                                                                                                                                                                                                                                                                                                                                                                                                                                                                                                                                                                                                                                                                                                                  |
| chr7 | 148513870 | 148984657 | M11,M14       | RNU7-20P, RN7SL569P, RNY5, RNY4, RNY3, RNY1, RNU6-650P, COX6B1P1, RN7SL521P, E2H2, PDIA4, ZNF786, ZNF425, ZNF398, ZNF282, ZNF212, ZNF783                                                                                                                                                                                                                                                                                                                                                                                                                                                                                                                                                                                                                                                                                                                                                                                                                                                                                                                                                                                                                                                                                                                                                                                                                                                                                                                                                                                                                                                                                                                                                                                                                                                                                                                                                                                                                                                                                                                                                                                                                                                                  |
| chr7 | 148984655 | 158935185 | M11,M14,M2    | LRR61, ZBED6CL, RARRS2, REPIN1, ZNF775, GIMAP8, GIMAP7, GIMAP4, GIMAP6, GIMAP2, GIMAP1, GIMAP5, TMEM176B, TMEM176A, AOC1, KCNH2, NOS3, NPM1P12, ZNF767, SSOPO, ATP6V0E2-AS1, ABCB8, LINC00996, STRADB1, ALDH1A1P3, ATG9B, ASIC3, IQCA1P1, MIR671, WDR86A1, MIR3907, RN7SL76P, ETF1P2, PRKAG2-AS1, RNU6-604P, YBX1P4, SEPT7P6, FAFBP5P3, CCT8L1P, LINC01003, RNA5SP250, RN7SL811P, ATP5F1P3, RN7SL845P, PAXIP1-AS1, RN7SKP280, CDK5, LINC01006, LINC01005, RNU4-31P, MNX1-AS2, MNX1-AS1, RN7SL142P, MIR553-2, MIR595, LINC01022, THAP5P1, LINC00689, SLC4A2, FASTK, ZNF783, ZNF777, ZNF746, TMUB1, AGAP3, KRBA1, ZNF467, ZNF862, ATP6V0E2, GBX1, ASB10, ACTR3C, ABCF2, CHPF2, SMARCD3, NUB1, WDR86, CRYGN, RHEB, PRKAG2, GALNTL5, GALNT11, KMT2C, XRCC2, ACTR3B, DPP6, PAXIP1-AS2, PAXIP1, HTR5A-AS1, HTR5A, INSG1, BLACE, EN2, CNPY1, RBM33, SHH, C7orf13, RNFB3, LMBR1, NOM1, MNX1, UBE3C, DNAJB6, PTPRN2, NCPAG2, ESYT2, WDR60, VIPR2                                                                                                                                                                                                                                                                                                                                                                                                                                                                                                                                                                                                                                                                                                                                                                                                                                                                                                                                                                                                                                                                                                                                                                                                                                                                   |
| chr7 | 158935187 | 158935237 | M11,M2        | VIPR2                                                                                                                                                                                                                                                                                                                                                                                                                                                                                                                                                                                                                                                                                                                                                                                                                                                                                                                                                                                                                                                                                                                                                                                                                                                                                                                                                                                                                                                                                                                                                                                                                                                                                                                                                                                                                                                                                                                                                                                                                                                                                                                                                                                                     |
| chr8 | 116087    | 116555    | M9            | OR4F21                                                                                                                                                                                                                                                                                                                                                                                                                                                                                                                                                                                                                                                                                                                                                                                                                                                                                                                                                                                                                                                                                                                                                                                                                                                                                                                                                                                                                                                                                                                                                                                                                                                                                                                                                                                                                                                                                                                                                                                                                                                                                                                                                                                                    |
| chr8 | 116555    | 21847886  | M14,M9        | PPP1R3B, TNKS, MSRA, PRSS55, FAM90A9P, FAM90A10P, RP1L1, C8orf74, HSPD1P2, DEFB108P1, FAM66E, SOX7, USP17L8, USP17L3, FAM90A11P, PINX1, FAM90A24P, XKR6, FAM90A12P, OR7E96P, MIR548I3, ENPP7P1, FAM85B, MTMR9, FAM86B3P, ALG1L13P, RN7SL178P, SLC35G5, RNU6-682P, C8orf12, MIR4660, RNU7-55P, FAM167A, BLK, RNU6-1151P, RNU6-526P, GATA4, MIR597, LINC00599, C8orf49, NEIL2, RNU6-729P, PRSS51, MIR4286, RNA5SP252, MIR598, LINC00529, RPL19P13, FDF11, TDH, RN7SL293P, RNU6-1084P, LINC00208, SUB1P1, OR7E158P, OR7E161P, OR7E160P, RNA5SP253, DEFB108P3, FAM66D, USP17L7, ORF2109P3, FAM90A2P, ALG1L11P, FAM85A, ENPP7P12, RNA5SP254, DEFB108P4, FAM66A, DEFB109P1, LINC00965, FAM90A25P, ALG1L12P, ENPP7P6, RPS3AP3A, RPS3AP35, OR7E8P, OR7E15P, OR7E10P, MIR5692A1, MIR5692A2, MIR3926-1, MIR3926-2, LINC00681, RNU6-842P, MTND4P7, RNA5SP255, CTSB, RNU7-153P, RNU6-397P, MIR383, PPM1AP1, MRPL49P2, RN7SL474P, ADAM24P, MIR548V, RNA5SP256, NATP, DEFB136, DEFB135, RPL35P6, DEFB134, ZNF705D, USP17L2, RPL30P9, RNU6-892P, LZTS1-AS1, FAM86B1, TMEM97P2, OR6R2P, DEFB130, FAM86B2, LONRF1, KIAA1456, DLC1, C8orf48, SGCZ, TUSC3, MSR1, FGF20, MICU3, ZDHHC2, CNOT7, RPL23AP53, FAM87A, ERICH1-AS1, VPS37A, MIR596, KBTBD11-OT1, RNA5SP251, RN7SL872P, PAICSP4, MTMR7, RN7SL318P, RPL23AP54, RN7SKP159, MIR4659A, MIR4659B, SLC7A2, XKR5, DEFA8P, DEFA9P, DEFA10P, PDGFRL, DEFT1P, DEFT1P2, DEFA11P, DEFA7P, RPS3AP30, RPS3AP33, OR7E125P, FAM90A15P, MTUS1, FAM90A3P, FAM90A4P, FAM90A13P, FAM90A5P, FAM90A20P, FAM66B, DEFB109P1B, USP17L1P, USP17L4, DEFB108P2, HSPD1P3, FAM90A6P, FAM90A7P, FAM90A21P, FAM90A22P, FAM90A23P, OR7E157P, OR7E154P, FAM90A14P, FAM90A18P, FAM90A16P, FAM90A8P, FAM90A17P, FAM90A19P, FGL1, PGM1, ASAH1, NAT1, NAT2, PSD3, SH2D4A, CSGALNACT1, INTS10, LPL, SLC18A1, ATP6V1B2, LZTS1, GFRA2, DOK2, XPO7, OR4F21, ZNF596, FBXO25, TDRP, ERICH1, DLGAP2, CLN8, ARHGEP10, KBTBD11, PCY2, CSM21, MCPH1, ANGP2, AGPAT5, DEFB1, DEFA6, DEFA4, DEFA1, DEFA1B, DEFA3, DEFA5, ZNF705G, DEFB4B, DEFB103B, SPAG11B, DEFB104B, DEFB106B, DEFB105B, DEFB107B, PRR23D1, PRR23D2, DEFB107A, DEFB105A, DEFB106A, DEFB104A, SPAG11A, DEFB103A, DEFB4A, ZNF705B, CLDN23, MFHAS1, ERI1 |
| chr8 | 21847886  | 22103042  | M9            | MIR320A, XPO7, NPM2, FGF17, DMTN, FAM160B2, NUDT18, HR, REEP4, LGI3, SFTPC, BMP1, PHYHIP, POLR3D                                                                                                                                                                                                                                                                                                                                                                                                                                                                                                                                                                                                                                                                                                                                                                                                                                                                                                                                                                                                                                                                                                                                                                                                                                                                                                                                                                                                                                                                                                                                                                                                                                                                                                                                                                                                                                                                                                                                                                                                                                                                                                          |
| chr8 | 22103042  | 39172973  | M14,M9        | PPAPDC1B, WHSC1L1, RNU6-1086P, MIR3622B, MIR3622A, RNU6-1276P, MIR4287, RPL5P22, RNU6-178P, MIR4288, RNA5SP259, EXTL3-AS1, HMBOX1-IT1, RNA5SP260, RN7SL781P, HMGB1P23, RPL17P33, LINC00589, FAM183CP, MIR3148, MAP2K1P1, RNU6-1218P, RPS15AP24, HSPA8P11, TUBBP1, RBPMS-AS1, RNU5A-3P, UBXN8, LETM2, SUMO2P16, RNA5SP261, NRG1-IT1, NRG1-IT2, RNA5SP262, RNA5SP263, NRG1-IT3, RNU6-663P, MTND1P6, MTND2P32, RANP9, RNU6-528P, SNORD13, RN7SL621P, RN7SL457P, VENTXP5, LSM12P1, FGFR1, RN7SKP201, MTND6P19, RNU6-533P, RPL23P10, RNA5SP264, TPT1P8, SMARCE1P4, RNU6-607P, RN7SL709P, RPS20P22, RNF5P1, RPL3P10, ADAM5, RNU6-336P, RN7SL303P, RNU4-71P, RNU1-148P, NEFL, RN7SL651P, RNA5SP258, SDAD1P1, COX6B1P4, MIR548H4, GULOP, C8orf86, TACC1, PLEKHA2, HTRA4, TM2D2, ADAM9, ADAM32, POLR3D, PIWIL2, SLC39A14, PPP3CC, SORBS3, PDLIM2, C8orf58, CCAR2, BIN3, EGR3, PEBP4, RHOB2B, TNFRSF10B, TNFRSF10C, TNFRSF10D, TNFRSF10A, CHMP7, R3HCC1, LOXL2, ENTPD4, SLC25A37, NKX3-1, NKX2-6, STC1, ADAM28, ADAMDEC1, ADAM7, NEFM, DOCK5, GNRH1, KCTD9, CDCA2, EBF2, PPP2R2A, BINIP3L, PNMA2, DPYSL2, ADRA1A, STMN4, TRIM35, PTK2B, CHRNA2, EPHX2, CLU, SCARA3, CCDC25, ESCO2, PBK, SCARA5, NUGGC, ELP3, PNOC, ZNF395, FBXO16, FZD3, EXTL3, INTS9, HMBOX1, KIF13B, DUSP4, TMEM66, LEPROTL1, MBOAT4, DCTN6, RBPMS, GTF2E2, SMIM18, GSR, PPP2CB, TEX15, PURG, WRN, NRG1, FUT10, TTI2, MAK16, RNF122, DUSP26, UCC5D, KCNU1, ZNF703, ERLIN2, PROSC, GPR124, BRF2, RAB11FIP1, GOT1L1, ADRB3, EIF4EBP1, ASH2L, STAR, LSM1, BAG4, DDHD2                                                                                                                                                                                                                                                                                                                                                                                                                                                                                                                                                                                                                                                                                |
| chr8 | 39172973  | 39682416  | M14,M16,M9    | ADAM5, ADAM3A, ADAM18, ADAM2                                                                                                                                                                                                                                                                                                                                                                                                                                                                                                                                                                                                                                                                                                                                                                                                                                                                                                                                                                                                                                                                                                                                                                                                                                                                                                                                                                                                                                                                                                                                                                                                                                                                                                                                                                                                                                                                                                                                                                                                                                                                                                                                                                              |
| chr8 | 39682416  | 43218328  | M14,M9        | RNU6-356P, MIR548AO, RPS29P2, RNU6-895P, KRT18P37, MIR486, RN7SL149P, RPL5P23, RN7SL806P, MIR4469, RNU1-124P, VN1R46P, AFG3L2P1, PTEA, RNU6-104P, ADAM2, IDO1, IDO2, C8orf4, ZMAT4, SFRP1, GOLGA7, GINS4, AGPAT6, NKX6-3, ANK1, KAT6A, AP3M2, PLAT, IKBKB, POLB, DLK4, YDCA6, SLC20A2, SMIM19, CHRNB3, CHRNA6, THAP1, RNF170, HOOK3, FNTA, POMK, HGSNAT                                                                                                                                                                                                                                                                                                                                                                                                                                                                                                                                                                                                                                                                                                                                                                                                                                                                                                                                                                                                                                                                                                                                                                                                                                                                                                                                                                                                                                                                                                                                                                                                                                                                                                                                                                                                                                                   |
| chr8 | 43218328  | 48192449  | M14           | PTEA, RN7SKP41, SNX18P27, CYP4F44P, HSPA8P13, ASNSP1, ASNSP4, TRIM60P15, LINC00293, MTND1P7, RNU6-656P, MTND6P20, MAPK6P5A, RN7SKP32, RNU6-819P, RPL10AP2, NDUFA5P12, ATP6V1G1P2, IGLV8OR8-1, SPIDR                                                                                                                                                                                                                                                                                                                                                                                                                                                                                                                                                                                                                                                                                                                                                                                                                                                                                                                                                                                                                                                                                                                                                                                                                                                                                                                                                                                                                                                                                                                                                                                                                                                                                                                                                                                                                                                                                                                                                                                                       |
| chr8 | 48192449  | 49642278  | M14,M2,M9     | RNU6-665P, RNU6-519P, RNU6-295P, RPL29P19, SPIDR, CEBPD, PRKDC, MCM4, UBE2V2, EFCAB1                                                                                                                                                                                                                                                                                                                                                                                                                                                                                                                                                                                                                                                                                                                                                                                                                                                                                                                                                                                                                                                                                                                                                                                                                                                                                                                                                                                                                                                                                                                                                                                                                                                                                                                                                                                                                                                                                                                                                                                                                                                                                                                      |
| chr8 | 49642278  | 54742093  | M14,M16,M2,M9 | RN7SKP294, RFL4AP7, PSAT1P1, CYCS2P2, RPL34P17, EFCAB1, SNAI2, C8orf22, SNTG1, PXDNL, PCMTD1, ST18, FAM150A, RB1CC1, NPBWR1, OPRK1, ATP6V1H                                                                                                                                                                                                                                                                                                                                                                                                                                                                                                                                                                                                                                                                                                                                                                                                                                                                                                                                                                                                                                                                                                                                                                                                                                                                                                                                                                                                                                                                                                                                                                                                                                                                                                                                                                                                                                                                                                                                                                                                                                                               |
| chr8 | 54742093  | 59493121  | M14,M2,M9     | RNU6-1331P, TDGF1P5, RNU6ATAC32P, RNU105C, RN7SL250P, SBF1P1, RNA5SP265, RN7SL798P, RN7SL323P, SNORD54, NPM1P21, SDR16C6P, SEPT10P1, LINC00968, RNU6-13P, RNA5SP266, LINC00588, RNU6-596P, RPL30P10, RNU7-174P, ATP6V1H, RGS20, TCEA1, LYPLA1, MRPL15, SOX17, RP1, XKR4, TMEM68, TGS1, LYN, RPS20, MOS, PLAG1, CHCHD7, SDR16C5, PENK, IMPAD1, FAM110B, UBXN2B, CYP7A1, SDCBP                                                                                                                                                                                                                                                                                                                                                                                                                                                                                                                                                                                                                                                                                                                                                                                                                                                                                                                                                                                                                                                                                                                                                                                                                                                                                                                                                                                                                                                                                                                                                                                                                                                                                                                                                                                                                              |
| chr8 | 59493121  | 59535804  | M14,M2,M6,M9  | SDCBP, NSMAF                                                                                                                                                                                                                                                                                                                                                                                                                                                                                                                                                                                                                                                                                                                                                                                                                                                                                                                                                                                                                                                                                                                                                                                                                                                                                                                                                                                                                                                                                                                                                                                                                                                                                                                                                                                                                                                                                                                                                                                                                                                                                                                                                                                              |

|      |           |           |                  |                                                                                                                                                                                                                                                                                                                                                                                                                                                                                                                                                                                                                                                                                                                                                                                                                                                                                                                                                                                                                                                                                                                                                                                                                                                                                                                                                                                                                                                                                                                                                                                                                                                                                                                                                                                                                                                                                                                                                                                                                                                                                                                                                                                                                                                                                                                                                                                                                                                                                                                                                                                                                                                                                                                                                                                                                                                                                                                                                                                                                                                                                                                                                                                                                                                                                                                                                                                                                                                                                                                                                                                                                                                                                                                                                                                                                                                                                                                                                                                                                                                                                                                                                                                                                                                                                                       |
|------|-----------|-----------|------------------|-------------------------------------------------------------------------------------------------------------------------------------------------------------------------------------------------------------------------------------------------------------------------------------------------------------------------------------------------------------------------------------------------------------------------------------------------------------------------------------------------------------------------------------------------------------------------------------------------------------------------------------------------------------------------------------------------------------------------------------------------------------------------------------------------------------------------------------------------------------------------------------------------------------------------------------------------------------------------------------------------------------------------------------------------------------------------------------------------------------------------------------------------------------------------------------------------------------------------------------------------------------------------------------------------------------------------------------------------------------------------------------------------------------------------------------------------------------------------------------------------------------------------------------------------------------------------------------------------------------------------------------------------------------------------------------------------------------------------------------------------------------------------------------------------------------------------------------------------------------------------------------------------------------------------------------------------------------------------------------------------------------------------------------------------------------------------------------------------------------------------------------------------------------------------------------------------------------------------------------------------------------------------------------------------------------------------------------------------------------------------------------------------------------------------------------------------------------------------------------------------------------------------------------------------------------------------------------------------------------------------------------------------------------------------------------------------------------------------------------------------------------------------------------------------------------------------------------------------------------------------------------------------------------------------------------------------------------------------------------------------------------------------------------------------------------------------------------------------------------------------------------------------------------------------------------------------------------------------------------------------------------------------------------------------------------------------------------------------------------------------------------------------------------------------------------------------------------------------------------------------------------------------------------------------------------------------------------------------------------------------------------------------------------------------------------------------------------------------------------------------------------------------------------------------------------------------------------------------------------------------------------------------------------------------------------------------------------------------------------------------------------------------------------------------------------------------------------------------------------------------------------------------------------------------------------------------------------------------------------------------------------------------------------------------------|
| chr8 | 59535804  | 128429439 | M14,M2,M9        | C8orf59, CA13, RN7SL777P, MIR4661, RN7SKP231, MRPS16P1, IRF5P1, LINC00535, RNA5SP274, ZNF317P1, MIR378D2, PSMA2P2, RPL34P18, RPS4XP10, RNU6-1209P, MIR3150B, MIR3150A, RNU6-690P, CA1, RNU6-1172P, RNU7-177P, SUMO2P18, RPS23P1, SNORA72, RNU6-703P, RNU6-914P, RNU6-748P, RPL19P14, MRP63P7, CA3, RN7SKP85, MIR599, MIR875, CA2, RN7SL350P, MIR1273A, MIR4471, GAPDHP62, RNU6-1092P, RNU6ATAC41P, RPS20P23, RNUA-43P, RPS26P6, RN7SL685P, RN7SKP249, RNU7-67P, NACA1P1, DUXAP2, RN7SL563P, MIR5680, SUMO2P19, RNU6ATAC8P, HSP61P14, RPS12P15, RNU6-1224P, POU5F1P2, REXO1L1P, REXO1L11P, REXO1L10P, ATP6V0D2, RPL5P24, NPM1P52, MTND1P5, MIR3151, PSKH2, RNUA-50P, RNU6-1011P, SLC7A13, RNA5SP267, MIR548A3, NDUFA5P2, TMCC1P1, SLC2A13P1, PDCL3P1, RNU6-1202P, WWP1, NPM1P6, KRT8P3, RN7SKP97, MIR4470, SLC16A14P1, TAGLN2P1, ZNF317P1, RNU7-84P, HMG81P46, PGAM1P13, RNA5SP275, NRBF2P4, RPS17P14, RNU2-87P, EEF1A1P37, RNUA-37P, RPL30P16, MIR2053, LINC00536, XRC6P4, YTHDF3-AS1, RN7SL135P, IFITM8P, RNTSKP135, COX6C8, LINC00966, MIR124-2, RNA5SP276, RAD21-AS1, MIR3610, RN7SL228P, RN7SL826P, RPS10P16, RPS26P35, RNU6-12P, MAL2, RN7SKP153, RN7SL396P, RNA5SP277, RPL35AP19, HAS2-AS1, MRPS36P3, LINC01151, RNY4-2, HMG81P19, FAM83A-AS1, MIR4663, UBA52P5, RNU6-628P, RNU6-875P, MIR548A1, MIR548D1, DUTP2, IMPDH1P6, RN7SKP155, FER1L6-AS1, FER1L6-AS2, ARF1P3, RNU6-756P, RNF139-AS1, MIR4662A, MIR4662B, LINC00964, RMDN1, RPL31P41, LINC00967, RNU6-1324P, PTTG3P, SNHG6, SNORD87, RNA5SP268, NDUFS5P6, RPL31P40, RPS15AP25, RNA5SP269, RNU7-102P, RN7SKP29, RN7SL675P, RNA5SP270, SDCBPP2, SUMO2P20, RNU1-101P, BTF3P12, CPNE3, RN7SL19P, TRAPP2P2, RPS20P20, KIAA0196-AS1, RN7SL329P, RN7SL590P, RNA5SP271, RNU6-442P, LINC00861, HAUS1P3, SOD1P3, KNOP1P5, RFPL4AP5, RNU6-869P, RNU11-4P, PCAT1, PCAT2, PRNCR1, CASC19, CCAT1, CASC8, RNU6-285P, STAU2-AS1, VENTXP6, GYG1P1, RPS20P21, RNU6-1300P, CNGB3, RPS3AP32, RNU6-1197P, MIR5681A, CASC9, HIGD1AP6, PKMP4, RNU2-54P, LINC01109, LINC01111, ZFH4-AS1, MRPL9P1, HIGD1AP18, RNU6-1220P, PRKRIRP7, RPL3P9, RNU7-85P, RN7SL41P, MIR5708, RNU6-1213P, RPSAP47, RNU2-71P, SLC25A51P3, RN7SL107P, CKS1BP7, RNU11-6P, RN7SL308P, HMG81P41, UBE2HP1, FTH1P11, IMPA1P, NIPA2P4, RPS26P34, SLC10A5P1, HNRNPA1P36, HNRNPA1P4, TPM3P3, RNU6-1040P, ACTBP6, IGJ1, REXO1L8P, REXO1L3P, REXO1L2P, REXO1L2P, NTAN1P2, SLC2A3P4, GOLGA2P1, UBE2Q2P10, SOX5P, RNA5SP272, KRT8P4, COX6B1P6, RNU6-925P, LINC00534, RNA5SP273, LINC01030, CNBD1, DCAF4L2, MMP16, RIPK2, OSGIN2, NBN, DECR1, CALB1, TMEM64, NECAB1, C8orf88, TMEM55A, OTUD6B, LRR69, SLC26A7, RUNX1T1, TRIQK, C8orf87, FAM92A1, RBM12B, RBM12B-AS1, TMEM67, PDP1, CDH17, GEM, RAD54B, FSBP, KIAA1429, ESRP1, DPY19L4, INTS8, CCNE2, NDUFAF6, TP53INP1, PLEKHF2, C8orf37, GDF6, UQCRB, MTERFD1, PTDSS1, SDC2, CPQ, TSPYL5, MTDH, LAPTM4B, MATN2, RPL30, C8orf47, HRSP12, POP1, NIPAL2, STK3, KCNS2, OSR2, VPS13B, COX6C, RGS22, FBXO43, POLR2K, SPAG1, RNF19A, ANKRD46, SNX31, PABPC1, YVHAX, ZNF706, GRHL2, NCALD, RRM2B, UBR5, ODF1, KLF10, AZIN1, ATP6V1C1, C8orf56, BAALC, FZD6, CTHRC1, SLC25A32, DCAF13, RIMS2, NSMAF, DPY5, DCSTAMP, LRP12, ZFPM2, TOX, CA8, RAB2A, CHD7, OXR1, CLVS1, ABRA, ANGPT1, ASPH, RSP02, EIF3E, EMC2, TMEM74, TRHR, NUDCD1, ENY2, NKAIN3, PKHD1L1, GGH, TTPA, YTHDF3, BHLHE22, EBAG9, CYP7B1, ARMC1, MTFR1, SYBU, PDE7A, KCN11, DNAJC5B, TRIM55, CSMD3, CRH, RRS1, ADHFE1, C8orf46, MYBL1, TRPS1, EIF3H, UTP23, VCPPIP1, C8orf44-SGK3, C8orf44, RAD21, SGK3, MCMDC2, AARD, SLC30A8, TCF24, PPP1R42, MED30, EXT1, COP55, SAMD12, TNFRSF11B, COLEC10, NOV, CSPP1, ENPP2, TAF2, DSCE1, ARFGEF1, DEPTOR, COL14A1, CPA6, PREX2, MRPL13, MTBP, SNTB1, C8orf34, HAS2, ZHX2, DERL1, TBC1D31, SULF1, FAM83A, C8orf76, SLC05A1, ZHX1-C8ORF76, ZHX1, PRDM14, NCOA2, ATAD2, TRAM1, WDYHV1, LACTB2, XKR9, FBXO32, EYA1, KLHL38, ANXA13, FAM91A1, FER1L6, TMEM65, TRMT12, RNF139, TATDN1, MSC, TRPA1, KCN82, TERF1, NUDF89, SBSPON, MTSS1, RPL7, RDH10, ZNF572, SQLE, STAU2, KIAA0196, UBE2V, NSMCE2, TRIB1, FAM84B, POU5F1B, TCEB1, TMEM70, LY96, JPH1, GDAP1, PH5, CRISPLD1, HNF4G, ZFH4, PEX2, PKIA, ZC2HC1A, IL7, STMN2, HEY1, MRPS28, TPD52, ZBTB10, ZNF704, PAG1, FABP5, PMP2, FBP9, FBP4, FBP12, IMPA1, SLC10A5, ZFAND1, CHMP4C, SNX16, RALYL, LRRCC1, E2F5 |
| chr8 | 128429439 | 128491327 | M14,M2           | CASC8, POU5F1B                                                                                                                                                                                                                                                                                                                                                                                                                                                                                                                                                                                                                                                                                                                                                                                                                                                                                                                                                                                                                                                                                                                                                                                                                                                                                                                                                                                                                                                                                                                                                                                                                                                                                                                                                                                                                                                                                                                                                                                                                                                                                                                                                                                                                                                                                                                                                                                                                                                                                                                                                                                                                                                                                                                                                                                                                                                                                                                                                                                                                                                                                                                                                                                                                                                                                                                                                                                                                                                                                                                                                                                                                                                                                                                                                                                                                                                                                                                                                                                                                                                                                                                                                                                                                                                                                        |
| chr8 | 128491327 | 144240279 | M14,M2,M9        | AGO2, PTK2, DENND3, CASC8, CASC11, PVT1, MIR1205, RNU1-106P, RNUA-25P, MIR1207, MIR1208, RN7SKP226, SLC45A4, LINC00977, RN7SKP206, CCDC26, MIR3686, RNU7-181P, MIR5194, RNU6-1255P, HPYR1, WISP1-OT1, ST13P6, MTND2P7, ZFAT-AS1, GPR20, PTPA43, MIR30B, MIR30B, MAPRE1P1, RNU1-35P, RNU6-144P, CASC7, MIR151A, RNA5SP278, MROH5, TSNARE1, HNRNPA1P38, MIR4472-1, LINC00051, MROH4P, JRK, ZNHIT1P1, CDC42P3, AK3P2, BAI1, ARC, PSCA, LY6K, THEM6, SLURP1, LYP2D, LYXN1, KYD8, HMLR, CYP11B1, CYP11B2, LY6E, C8orf31, LY6H, MYC, TMEM75, GSDMC, FAM48A, ASAP1, ADCY8, EFR3A, OC90, HHLA1, KCNQ3, LRR62, TMEM71, PHF20L1, TG, SLA, WISP1, NDRG1, ST3GAL1, ZFAT, KHDRBS3, FAM135B, COL22A1, KCNK9, TRAPP9, C8orf17, CHRAC3                                                                                                                                                                                                                                                                                                                                                                                                                                                                                                                                                                                                                                                                                                                                                                                                                                                                                                                                                                                                                                                                                                                                                                                                                                                                                                                                                                                                                                                                                                                                                                                                                                                                                                                                                                                                                                                                                                                                                                                                                                                                                                                                                                                                                                                                                                                                                                                                                                                                                                                                                                                                                                                                                                                                                                                                                                                                                                                                                                                                                                                                                                                                                                                                                                                                                                                                                                                                                                                                                                                                                                                |
| chr8 | 144240279 | 144620831 | M2,M9            | RNU6-220P, RHPN1-AS1, LY6H, GPIHBP1, ZFP41, GLI4, ZNF696, TOP1MT, RHPN1, MAFA, ZC3H3                                                                                                                                                                                                                                                                                                                                                                                                                                                                                                                                                                                                                                                                                                                                                                                                                                                                                                                                                                                                                                                                                                                                                                                                                                                                                                                                                                                                                                                                                                                                                                                                                                                                                                                                                                                                                                                                                                                                                                                                                                                                                                                                                                                                                                                                                                                                                                                                                                                                                                                                                                                                                                                                                                                                                                                                                                                                                                                                                                                                                                                                                                                                                                                                                                                                                                                                                                                                                                                                                                                                                                                                                                                                                                                                                                                                                                                                                                                                                                                                                                                                                                                                                                                                                  |
| chr8 | 144620831 | 144698332 | M2,M6,M9         | ZC3H3, GSDMD, MROH6, NAPRT1, EEF1D, TIGD5, PYCRL, TSTA3                                                                                                                                                                                                                                                                                                                                                                                                                                                                                                                                                                                                                                                                                                                                                                                                                                                                                                                                                                                                                                                                                                                                                                                                                                                                                                                                                                                                                                                                                                                                                                                                                                                                                                                                                                                                                                                                                                                                                                                                                                                                                                                                                                                                                                                                                                                                                                                                                                                                                                                                                                                                                                                                                                                                                                                                                                                                                                                                                                                                                                                                                                                                                                                                                                                                                                                                                                                                                                                                                                                                                                                                                                                                                                                                                                                                                                                                                                                                                                                                                                                                                                                                                                                                                                               |
| chr8 | 144698332 | 144895667 | M2,M9            | RNU7-109P, RHM4664, FAM83H-AS1, MIR937, TSTA3, ZNF623, ZNF707, CCDC166, MAPK15, FAM83H, SCRIB                                                                                                                                                                                                                                                                                                                                                                                                                                                                                                                                                                                                                                                                                                                                                                                                                                                                                                                                                                                                                                                                                                                                                                                                                                                                                                                                                                                                                                                                                                                                                                                                                                                                                                                                                                                                                                                                                                                                                                                                                                                                                                                                                                                                                                                                                                                                                                                                                                                                                                                                                                                                                                                                                                                                                                                                                                                                                                                                                                                                                                                                                                                                                                                                                                                                                                                                                                                                                                                                                                                                                                                                                                                                                                                                                                                                                                                                                                                                                                                                                                                                                                                                                                                                         |
| chr8 | 144895667 | 145166600 | M2,M6,M9         | MIR661, OPLAH, SCRIB, PUF60, NRBP2, EPPK1, PLEC, PNF10, GRINA, SPATC1, EXOSC4, GPAA1, CYC1, SHARPIN, MAF1, KIAA1875                                                                                                                                                                                                                                                                                                                                                                                                                                                                                                                                                                                                                                                                                                                                                                                                                                                                                                                                                                                                                                                                                                                                                                                                                                                                                                                                                                                                                                                                                                                                                                                                                                                                                                                                                                                                                                                                                                                                                                                                                                                                                                                                                                                                                                                                                                                                                                                                                                                                                                                                                                                                                                                                                                                                                                                                                                                                                                                                                                                                                                                                                                                                                                                                                                                                                                                                                                                                                                                                                                                                                                                                                                                                                                                                                                                                                                                                                                                                                                                                                                                                                                                                                                                   |
| chr8 | 145166600 | 145634477 | M2,M9            | TSSK5P1, MIR939, MIR1234, KIAA1875, FAM203A, MROH1, SCXB, FAM203B, BOP1, SCXA, HSF1, DGAT1, SCRT1, TMEM249, SLC52A2, FBXL6, ADCK5, CPSF1                                                                                                                                                                                                                                                                                                                                                                                                                                                                                                                                                                                                                                                                                                                                                                                                                                                                                                                                                                                                                                                                                                                                                                                                                                                                                                                                                                                                                                                                                                                                                                                                                                                                                                                                                                                                                                                                                                                                                                                                                                                                                                                                                                                                                                                                                                                                                                                                                                                                                                                                                                                                                                                                                                                                                                                                                                                                                                                                                                                                                                                                                                                                                                                                                                                                                                                                                                                                                                                                                                                                                                                                                                                                                                                                                                                                                                                                                                                                                                                                                                                                                                                                                              |
| chr8 | 145634477 | 145752793 | M2,M6,M9         | CYHR1, KIFC2, FOXH1, PPP1R16A, GTF, MFSD3, RECL4, LRR62, LRR62, RNU6-1293P, BMS1P12, IGKV1OR-1, BMS1P13, IGKV1OR-3, MEP1AP2, PGM5-AS1, FAM27E3, FAM27B, ANKRD20A1, FOXD4L6, CBWD6, ANKRD20A4, FOXD4L5, FOXD4L4, CBWD5, CBWD3, FOXD4L3, PGM5, TMEM252, PIP5K1B                                                                                                                                                                                                                                                                                                                                                                                                                                                                                                                                                                                                                                                                                                                                                                                                                                                                                                                                                                                                                                                                                                                                                                                                                                                                                                                                                                                                                                                                                                                                                                                                                                                                                                                                                                                                                                                                                                                                                                                                                                                                                                                                                                                                                                                                                                                                                                                                                                                                                                                                                                                                                                                                                                                                                                                                                                                                                                                                                                                                                                                                                                                                                                                                                                                                                                                                                                                                                                                                                                                                                                                                                                                                                                                                                                                                                                                                                                                                                                                                                                         |
| chr8 | 145752793 | 146281415 | M2,M9            | ZNF252P, TMED10P1, ZNF252P-AS1, C8orf82, ARHGAP39, ZNF251, ZNF34, RBL8, ZNF517, ZNF7, COIMMDS, ZNF250, ZNF16, RN7SL395P, C8orf33                                                                                                                                                                                                                                                                                                                                                                                                                                                                                                                                                                                                                                                                                                                                                                                                                                                                                                                                                                                                                                                                                                                                                                                                                                                                                                                                                                                                                                                                                                                                                                                                                                                                                                                                                                                                                                                                                                                                                                                                                                                                                                                                                                                                                                                                                                                                                                                                                                                                                                                                                                                                                                                                                                                                                                                                                                                                                                                                                                                                                                                                                                                                                                                                                                                                                                                                                                                                                                                                                                                                                                                                                                                                                                                                                                                                                                                                                                                                                                                                                                                                                                                                                                      |
| chr9 | 14510     | 14725     | M1,M16,M17,M8    | DDX11L5                                                                                                                                                                                                                                                                                                                                                                                                                                                                                                                                                                                                                                                                                                                                                                                                                                                                                                                                                                                                                                                                                                                                                                                                                                                                                                                                                                                                                                                                                                                                                                                                                                                                                                                                                                                                                                                                                                                                                                                                                                                                                                                                                                                                                                                                                                                                                                                                                                                                                                                                                                                                                                                                                                                                                                                                                                                                                                                                                                                                                                                                                                                                                                                                                                                                                                                                                                                                                                                                                                                                                                                                                                                                                                                                                                                                                                                                                                                                                                                                                                                                                                                                                                                                                                                                                               |
| chr9 | 14725     | 29670     | M1,M16,M17,M6,M8 | MIR1302-11, MIR1302-10, MIR1302-9, MIR1302-2                                                                                                                                                                                                                                                                                                                                                                                                                                                                                                                                                                                                                                                                                                                                                                                                                                                                                                                                                                                                                                                                                                                                                                                                                                                                                                                                                                                                                                                                                                                                                                                                                                                                                                                                                                                                                                                                                                                                                                                                                                                                                                                                                                                                                                                                                                                                                                                                                                                                                                                                                                                                                                                                                                                                                                                                                                                                                                                                                                                                                                                                                                                                                                                                                                                                                                                                                                                                                                                                                                                                                                                                                                                                                                                                                                                                                                                                                                                                                                                                                                                                                                                                                                                                                                                          |
| chr9 | 29670     | 29739     | M1,M16,M17,M8    | MIR1302-11, MIR1302-10, MIR1302-9, MIR1302-2                                                                                                                                                                                                                                                                                                                                                                                                                                                                                                                                                                                                                                                                                                                                                                                                                                                                                                                                                                                                                                                                                                                                                                                                                                                                                                                                                                                                                                                                                                                                                                                                                                                                                                                                                                                                                                                                                                                                                                                                                                                                                                                                                                                                                                                                                                                                                                                                                                                                                                                                                                                                                                                                                                                                                                                                                                                                                                                                                                                                                                                                                                                                                                                                                                                                                                                                                                                                                                                                                                                                                                                                                                                                                                                                                                                                                                                                                                                                                                                                                                                                                                                                                                                                                                                          |
| chr9 | 29739     | 175784    | M1,M16,M17       | FOXD4, CBWD1, MIR1302-11, MIR1302-10, MIR1302-9, MIR1302-2, FAM138C                                                                                                                                                                                                                                                                                                                                                                                                                                                                                                                                                                                                                                                                                                                                                                                                                                                                                                                                                                                                                                                                                                                                                                                                                                                                                                                                                                                                                                                                                                                                                                                                                                                                                                                                                                                                                                                                                                                                                                                                                                                                                                                                                                                                                                                                                                                                                                                                                                                                                                                                                                                                                                                                                                                                                                                                                                                                                                                                                                                                                                                                                                                                                                                                                                                                                                                                                                                                                                                                                                                                                                                                                                                                                                                                                                                                                                                                                                                                                                                                                                                                                                                                                                                                                                   |
| chr9 | 175784    | 179075    | M1,M17           | CBWD1                                                                                                                                                                                                                                                                                                                                                                                                                                                                                                                                                                                                                                                                                                                                                                                                                                                                                                                                                                                                                                                                                                                                                                                                                                                                                                                                                                                                                                                                                                                                                                                                                                                                                                                                                                                                                                                                                                                                                                                                                                                                                                                                                                                                                                                                                                                                                                                                                                                                                                                                                                                                                                                                                                                                                                                                                                                                                                                                                                                                                                                                                                                                                                                                                                                                                                                                                                                                                                                                                                                                                                                                                                                                                                                                                                                                                                                                                                                                                                                                                                                                                                                                                                                                                                                                                                 |
| chr9 | 179075    | 312166    | M1               | CBWD1, C9orf66, DOCK8                                                                                                                                                                                                                                                                                                                                                                                                                                                                                                                                                                                                                                                                                                                                                                                                                                                                                                                                                                                                                                                                                                                                                                                                                                                                                                                                                                                                                                                                                                                                                                                                                                                                                                                                                                                                                                                                                                                                                                                                                                                                                                                                                                                                                                                                                                                                                                                                                                                                                                                                                                                                                                                                                                                                                                                                                                                                                                                                                                                                                                                                                                                                                                                                                                                                                                                                                                                                                                                                                                                                                                                                                                                                                                                                                                                                                                                                                                                                                                                                                                                                                                                                                                                                                                                                                 |
| chr9 | 37904207  | 37915895  | M14              | SLC25A51                                                                                                                                                                                                                                                                                                                                                                                                                                                                                                                                                                                                                                                                                                                                                                                                                                                                                                                                                                                                                                                                                                                                                                                                                                                                                                                                                                                                                                                                                                                                                                                                                                                                                                                                                                                                                                                                                                                                                                                                                                                                                                                                                                                                                                                                                                                                                                                                                                                                                                                                                                                                                                                                                                                                                                                                                                                                                                                                                                                                                                                                                                                                                                                                                                                                                                                                                                                                                                                                                                                                                                                                                                                                                                                                                                                                                                                                                                                                                                                                                                                                                                                                                                                                                                                                                              |
| chr9 | 37915895  | 39072765  | M14,M16          | RNU7-124P, VN1R48P, FAM220BP, CYP4F33P, SNX18P3, FAM201A, RNU6-765P, VN2R3P, SHB, ALDH1B1, IGF6P1, ANKRD18A, CNTNAP3                                                                                                                                                                                                                                                                                                                                                                                                                                                                                                                                                                                                                                                                                                                                                                                                                                                                                                                                                                                                                                                                                                                                                                                                                                                                                                                                                                                                                                                                                                                                                                                                                                                                                                                                                                                                                                                                                                                                                                                                                                                                                                                                                                                                                                                                                                                                                                                                                                                                                                                                                                                                                                                                                                                                                                                                                                                                                                                                                                                                                                                                                                                                                                                                                                                                                                                                                                                                                                                                                                                                                                                                                                                                                                                                                                                                                                                                                                                                                                                                                                                                                                                                                                                  |
| chr9 | 39072765  | 45728282  | M1,M14,M16       | RN7SL640P, FAM74A5, ATP5A1P9, RN7SL462P, FAM74A1, VN2R4P, VN2R5P, RN7SL422P, FAM74A3, ATP5A1P1, FAM74A2, FAM74A6, ZNF658B, ATP5A1P8, RBPJP5, RN7SL763P, MEP1AP1, RNU6-1269P, SNX18P8, FAM95B1, CNN2P2, IGKV1OR-2, MTND1P12, BMS1P14, AQP7P3, CYP4F59P, SNX18P4, RNU6-538P, MEP1AP3, ATP5A1P5, RN7SL343P, CNN2P4, CYP4F60P, SNX18P5, ANKRD20A7P, RNU6-599P, MEP1AP4, RBPJP6, ATP5A1P6, FAM27E4, CDK2AP2P1, MYO5BP1, RN7SL565P, CNTNAP3, SPATA31A1, SPATA31A2, ZNF658, SPATA31A4, SPATA31A5, ANKRD20A2, CBWD7, FOXD4L2, ANKRD20A3, SPATA31A6, CNTNAP3B, FAM27C, FAM27A                                                                                                                                                                                                                                                                                                                                                                                                                                                                                                                                                                                                                                                                                                                                                                                                                                                                                                                                                                                                                                                                                                                                                                                                                                                                                                                                                                                                                                                                                                                                                                                                                                                                                                                                                                                                                                                                                                                                                                                                                                                                                                                                                                                                                                                                                                                                                                                                                                                                                                                                                                                                                                                                                                                                                                                                                                                                                                                                                                                                                                                                                                                                                                                                                                                                                                                                                                                                                                                                                                                                                                                                                                                                                                                                  |
| chr9 | 45728282  | 66499628  | M14              | RN7SL722P, RN7SL544P, RBPJP7, ATP5A1P7, VN2R6P, FAM74A4, RBPJP2, ATP5A1P10, CNN2P5, CYP4F61P, SNX18P6, RNA5SP283, FAM27E2, FAM27E1, FAM27D1, SPATA31A7                                                                                                                                                                                                                                                                                                                                                                                                                                                                                                                                                                                                                                                                                                                                                                                                                                                                                                                                                                                                                                                                                                                                                                                                                                                                                                                                                                                                                                                                                                                                                                                                                                                                                                                                                                                                                                                                                                                                                                                                                                                                                                                                                                                                                                                                                                                                                                                                                                                                                                                                                                                                                                                                                                                                                                                                                                                                                                                                                                                                                                                                                                                                                                                                                                                                                                                                                                                                                                                                                                                                                                                                                                                                                                                                                                                                                                                                                                                                                                                                                                                                                                                                                |
| chr9 | 66499628  | 71357573  | M14,M16          | PTGER4P2, CDK2AP2P2, MYO5BP2, RNU6-156P, BMS1P9, AQP7P4, AQP7P1, BMS1P10, RN7SL787P, RNU6-368P, MYO5BP3, CDK2AP2P3, PTGER4P3, RNA5SP284, LINC00537, MIR4477B, MIR4477A, PGM5P1, MIR1299, PGM5P2, RNU6-1193P, SNX18P9, CYP4F25P, CNN2P3, AQP7P2, BMS1P11, IGKV1OR-2, RNU6-1293P, BMS1P12, IGKV1OR-1, BMS1P13, IGKV1OR-3, MEP1AP2, PGM5-AS1, FAM27E3, FAM27B, ANKRD20A1, FOXD4L6, CBWD6, ANKRD20A4, FOXD4L5, FOXD4L4, CBWD5, CBWD3, FOXD4L3, PGM5, TMEM252, PIP5K1B                                                                                                                                                                                                                                                                                                                                                                                                                                                                                                                                                                                                                                                                                                                                                                                                                                                                                                                                                                                                                                                                                                                                                                                                                                                                                                                                                                                                                                                                                                                                                                                                                                                                                                                                                                                                                                                                                                                                                                                                                                                                                                                                                                                                                                                                                                                                                                                                                                                                                                                                                                                                                                                                                                                                                                                                                                                                                                                                                                                                                                                                                                                                                                                                                                                                                                                                                                                                                                                                                                                                                                                                                                                                                                                                                                                                                                     |
| chr9 | 71357573  | 71549883  | M14              | PIP5K1B, FAM122A                                                                                                                                                                                                                                                                                                                                                                                                                                                                                                                                                                                                                                                                                                                                                                                                                                                                                                                                                                                                                                                                                                                                                                                                                                                                                                                                                                                                                                                                                                                                                                                                                                                                                                                                                                                                                                                                                                                                                                                                                                                                                                                                                                                                                                                                                                                                                                                                                                                                                                                                                                                                                                                                                                                                                                                                                                                                                                                                                                                                                                                                                                                                                                                                                                                                                                                                                                                                                                                                                                                                                                                                                                                                                                                                                                                                                                                                                                                                                                                                                                                                                                                                                                                                                                                                                      |
| chr9 | 137642387 | 137716701 | M1               | COL5A1                                                                                                                                                                                                                                                                                                                                                                                                                                                                                                                                                                                                                                                                                                                                                                                                                                                                                                                                                                                                                                                                                                                                                                                                                                                                                                                                                                                                                                                                                                                                                                                                                                                                                                                                                                                                                                                                                                                                                                                                                                                                                                                                                                                                                                                                                                                                                                                                                                                                                                                                                                                                                                                                                                                                                                                                                                                                                                                                                                                                                                                                                                                                                                                                                                                                                                                                                                                                                                                                                                                                                                                                                                                                                                                                                                                                                                                                                                                                                                                                                                                                                                                                                                                                                                                                                                |
| chr9 | 140057376 | 140167012 | M6               | MIR3621, GRIN1, LRR62, TMEM210, ANAPC2, SSNA1, TPRN, TMEM203, NDOR1, RNF208, C9orf169, RNF224, SLC34A3, TUBB4B, FAM166A, C9orf173, NELFB                                                                                                                                                                                                                                                                                                                                                                                                                                                                                                                                                                                                                                                                                                                                                                                                                                                                                                                                                                                                                                                                                                                                                                                                                                                                                                                                                                                                                                                                                                                                                                                                                                                                                                                                                                                                                                                                                                                                                                                                                                                                                                                                                                                                                                                                                                                                                                                                                                                                                                                                                                                                                                                                                                                                                                                                                                                                                                                                                                                                                                                                                                                                                                                                                                                                                                                                                                                                                                                                                                                                                                                                                                                                                                                                                                                                                                                                                                                                                                                                                                                                                                                                                              |
| chrX | 30714733  | 30852218  | M9               | GK, TAB3, GK-AS1                                                                                                                                                                                                                                                                                                                                                                                                                                                                                                                                                                                                                                                                                                                                                                                                                                                                                                                                                                                                                                                                                                                                                                                                                                                                                                                                                                                                                                                                                                                                                                                                                                                                                                                                                                                                                                                                                                                                                                                                                                                                                                                                                                                                                                                                                                                                                                                                                                                                                                                                                                                                                                                                                                                                                                                                                                                                                                                                                                                                                                                                                                                                                                                                                                                                                                                                                                                                                                                                                                                                                                                                                                                                                                                                                                                                                                                                                                                                                                                                                                                                                                                                                                                                                                                                                      |
| chrX | 30852218  | 44107656  | M14,M9           | TAB3, FTHL17, DMD, FAM47A, TMEM47, FAM47B, MAGEB16, CXorf22, CHDC2, CXorf30, FAM47C, PRRG1, LANCL3, XK, CYBB, DYNLT3, CXorf27, SYTL5, SRPX, RPGR, OTC, TSPAN7, MID1P1, BCOR, ATP6AP2, CXorf38, MED14, USP9X, DDX3X, NYX, CASK, GPR34, GPR82, MAOA, MAOB, NDP, EFHC2, TAB3-AS1, TAB3-AS2, RNU6-894P, RNA5SP501, NPM1P8, MIR3915, MIR548F5, DMD-AS3, TBCAP1, FTH1P14, RNU6-1087P, SIAH1P1, RNU6-641P, HMG81P16, RPS15AP40, FTH1P18, MOB1AP2, FTH1P19, FTH1P27, FAM47DP, RNU6-49P, MIR548AJ2, TDGF1P1, FTLP16, RNU7-7P, MID1P1-AS1, RNU6-591P, MIR3937, RN7SL732P, GAPDHP1, MIR1587, RPS11P7, RNU7-164P, MPC1L, MED14-AS1, DPRX6P, MKRNA4P, SDCBPP3, RPS2P55, RNA5SP502, RN7SL15P, CASK-AS1, RNU6-1321P, RN7SL406P, RN7SL144P, RNU6-202P, ATP5G2P4, RNU6-630P, RNU6-1124P, PPP1R2P9, IMPDH1P4, NANOOGP10, NDP-AS1                                                                                                                                                                                                                                                                                                                                                                                                                                                                                                                                                                                                                                                                                                                                                                                                                                                                                                                                                                                                                                                                                                                                                                                                                                                                                                                                                                                                                                                                                                                                                                                                                                                                                                                                                                                                                                                                                                                                                                                                                                                                                                                                                                                                                                                                                                                                                                                                                                                                                                                                                                                                                                                                                                                                                                                                                                                                                                                                                                                                                                                                                                                                                                                                                                                                                                                                                                                                                                                                                        |
| chrX | 44107656  | 46893106  | M14              | MIR222, MED28P4, KRT18P68, PCNAP3, ACTBP1, GAPDHP65, RNU6-50P, ZNF674-AS1, MKI67P1, PGAM1P7, YBX1P8, EFHC2, FUND1, DUSP21, KDM6A, CXorf36, KRBOX4, ZNF674, CHST7, SLC9A7, RP2, CXorf31, JADE3, TATND2P1, RRM2P3, FDPSP5, CHTF8P1, RPL19P20, RN7SL291P, RNU6-523P, KRT8P14, MIR221                                                                                                                                                                                                                                                                                                                                                                                                                                                                                                                                                                                                                                                                                                                                                                                                                                                                                                                                                                                                                                                                                                                                                                                                                                                                                                                                                                                                                                                                                                                                                                                                                                                                                                                                                                                                                                                                                                                                                                                                                                                                                                                                                                                                                                                                                                                                                                                                                                                                                                                                                                                                                                                                                                                                                                                                                                                                                                                                                                                                                                                                                                                                                                                                                                                                                                                                                                                                                                                                                                                                                                                                                                                                                                                                                                                                                                                                                                                                                                                                                     |
| chrX | 47046041  | 47099247  | M6               | INE1, RBM10, UBA1, CDK16, USP11                                                                                                                                                                                                                                                                                                                                                                                                                                                                                                                                                                                                                                                                                                                                                                                                                                                                                                                                                                                                                                                                                                                                                                                                                                                                                                                                                                                                                                                                                                                                                                                                                                                                                                                                                                                                                                                                                                                                                                                                                                                                                                                                                                                                                                                                                                                                                                                                                                                                                                                                                                                                                                                                                                                                                                                                                                                                                                                                                                                                                                                                                                                                                                                                                                                                                                                                                                                                                                                                                                                                                                                                                                                                                                                                                                                                                                                                                                                                                                                                                                                                                                                                                                                                                                                                       |
| chrX | 54841680  | 57937067  | M9               | MTND2P24, MTND1P30, RPL23AP83, UQCRBP1, PPP1R11P2, MTHFD1P1, MAGED2, TRO, PFKFB1, APEX2, ALAS2, PAGE2B, PAGE2, FAM104B, MTRNR2L10, PAGE5, PAGE3, MAGEH1, USP51, FOXR2, RRAGB, KLF8, UBQLN2, SPIN3, SPIN2B, SPIN2A, FAAH2, ZDXB, ZXDA                                                                                                                                                                                                                                                                                                                                                                                                                                                                                                                                                                                                                                                                                                                                                                                                                                                                                                                                                                                                                                                                                                                                                                                                                                                                                                                                                                                                                                                                                                                                                                                                                                                                                                                                                                                                                                                                                                                                                                                                                                                                                                                                                                                                                                                                                                                                                                                                                                                                                                                                                                                                                                                                                                                                                                                                                                                                                                                                                                                                                                                                                                                                                                                                                                                                                                                                                                                                                                                                                                                                                                                                                                                                                                                                                                                                                                                                                                                                                                                                                                                                  |
| chrX | 77359665  | 79277741  | M9               | FNDCC3CP, HMGN1P34, UBE2V1P7, PPATP2, RPL7P54, KIF4CP, PGK1, TAF9B, CYSLTR1, ZCHC5, LPAR4, P2RY10, GPR174, ITM2A, TBX22                                                                                                                                                                                                                                                                                                                                                                                                                                                                                                                                                                                                                                                                                                                                                                                                                                                                                                                                                                                                                                                                                                                                                                                                                                                                                                                                                                                                                                                                                                                                                                                                                                                                                                                                                                                                                                                                                                                                                                                                                                                                                                                                                                                                                                                                                                                                                                                                                                                                                                                                                                                                                                                                                                                                                                                                                                                                                                                                                                                                                                                                                                                                                                                                                                                                                                                                                                                                                                                                                                                                                                                                                                                                                                                                                                                                                                                                                                                                                                                                                                                                                                                                                                               |

|      |           |           |            |                                                                                                                                                                                                                                                                                                                                                                                                                                                                                                                                                                                                                                                                                                                                                                                                                                                                                                                                                                                                                                                                                                                                                                                                                                                                                                                                                                                                                                                                                                                                                                                                                                                                                                                                                                                                                                                                                                                                                                                                                                 |
|------|-----------|-----------|------------|---------------------------------------------------------------------------------------------------------------------------------------------------------------------------------------------------------------------------------------------------------------------------------------------------------------------------------------------------------------------------------------------------------------------------------------------------------------------------------------------------------------------------------------------------------------------------------------------------------------------------------------------------------------------------------------------------------------------------------------------------------------------------------------------------------------------------------------------------------------------------------------------------------------------------------------------------------------------------------------------------------------------------------------------------------------------------------------------------------------------------------------------------------------------------------------------------------------------------------------------------------------------------------------------------------------------------------------------------------------------------------------------------------------------------------------------------------------------------------------------------------------------------------------------------------------------------------------------------------------------------------------------------------------------------------------------------------------------------------------------------------------------------------------------------------------------------------------------------------------------------------------------------------------------------------------------------------------------------------------------------------------------------------|
| chrX | 79277741  | 100093353 | M16,M9     | MIR54814, SETP4, UBE2DNL, MIR361, NDUFA5P7, TPMP4, EEF1A1P29, GEMIN8P3, FCF1P9, RPSAP15, SRIP2, USP12PX, RNF19BPX, UBE2V1P9, RNU6-555P, PABPC5-AS1, SERBP1P4, RNU2-26P, VDAC1P3, EIF4A1P10, KRT18P11, SNX3P1X, ST13P18, RPL7P55, RNU6-332P, PAICSP7, CCNB1P1P3, MIR548M, CALM1P1, RNA5SP510, HNRNPDL3, HNRNPDL3P1, RPS7P13, RN7SL379P, RPS29P28, RN7SKP194, RN7SL74P, DIAPH2-AS1, RPL6P29, EEF1A1P15, HMGB1P32, XRCC6P5, RPSAP8, CHMP1B2P, HNRNPH3P1, HK2P1, RNU6-493P, VDAC1P1, RNU6-995P, RNU6-974P, RPL22P22, ATGA4P1, TERF1P4, TBX22, FAM46D, BRWD3, HMGN5, SH3BGR, YOU3F4, CYLC1, RPS6KA6, HDX, APOOL, SATL1, ZNF711, POF1B, CHM, DACH2, KLHL4, CPXCR1, TGIF2LX, PABPC5, PCDH11X, NAP1L3, FAM133A, DIAPH2, RPA4, PCDH19, TNMD, TSPAN6, SRPX2, SYTL4, CSTF2                                                                                                                                                                                                                                                                                                                                                                                                                                                                                                                                                                                                                                                                                                                                                                                                                                                                                                                                                                                                                                                                                                                                                                                                                                                                 |
| chrX | 100093353 | 100095921 | M9         | CSTF2                                                                                                                                                                                                                                                                                                                                                                                                                                                                                                                                                                                                                                                                                                                                                                                                                                                                                                                                                                                                                                                                                                                                                                                                                                                                                                                                                                                                                                                                                                                                                                                                                                                                                                                                                                                                                                                                                                                                                                                                                           |
| chrX | 103903625 | 107403692 | M14        | RPL18AP14, KCTD9P2, RNU6-207P, NAP1L4P2, MIR548AN, EEF1A1P40, MYCLP1, DNAJA1P3, KRT18P49, FRMPD3-AS1, IL1RAPL2, TEX13A, NRK, SERPINA7, MUM1L1, CXorf57, RNF128, TBC1D8B, MORC4, RIPPLY1, CLDN2, RBM41, NUP62CL, PIH1D3, FRMPD3, PRPS1, TSC22D3, NCBP2L, MID2, TEX13B, VSI1G1, PSMD10, ATGA4A, COL4A6                                                                                                                                                                                                                                                                                                                                                                                                                                                                                                                                                                                                                                                                                                                                                                                                                                                                                                                                                                                                                                                                                                                                                                                                                                                                                                                                                                                                                                                                                                                                                                                                                                                                                                                            |
| chrX | 107403692 | 107431746 | M1,M14     | COL4A6                                                                                                                                                                                                                                                                                                                                                                                                                                                                                                                                                                                                                                                                                                                                                                                                                                                                                                                                                                                                                                                                                                                                                                                                                                                                                                                                                                                                                                                                                                                                                                                                                                                                                                                                                                                                                                                                                                                                                                                                                          |
| chrX | 107431746 | 107929359 | M1,M14,M17 | COL4A6, COL4A5                                                                                                                                                                                                                                                                                                                                                                                                                                                                                                                                                                                                                                                                                                                                                                                                                                                                                                                                                                                                                                                                                                                                                                                                                                                                                                                                                                                                                                                                                                                                                                                                                                                                                                                                                                                                                                                                                                                                                                                                                  |
| chrX | 107929359 | 108636284 | M14,M17    | RNU6-309P, COL4A5, IRS4, GUCY2F                                                                                                                                                                                                                                                                                                                                                                                                                                                                                                                                                                                                                                                                                                                                                                                                                                                                                                                                                                                                                                                                                                                                                                                                                                                                                                                                                                                                                                                                                                                                                                                                                                                                                                                                                                                                                                                                                                                                                                                                 |
| chrX | 108636284 | 114391197 | M14        | RPS5P7, MIR652, MIR3978, SNORD96B, AMMECR1-IT1, TDGF1P3, FCF1P4, GLUD1P9, RNU6-496P, HMGB1P12, LINC00890, RN7SL661P, EIF4BP7, RPL18AP15, RNA5SP512, ALG13-AS1, TRPC5OS, DPRXP7, HMGB3P30, MIR4329, RN7SL266P, RNU6-1015P, QTRT1P1, RNU1-57P, RN7SL93P, SSU72P1, RPL36AP53, SNORA35, MIR764, MIR1912, MIR1298, MIR1911, HSPA8P7, MIR448, RNU6-648P, YAP1P2, GUCY2F, NXT2, KCNE1L, ACSL4, TMEM164, AMMECR1, GNG5P2, RGAG1, CHRDL1, PAK3, CAPN6, DCX, ALG13, TRPC5, ZCCH16, LHFPL1, AMOT, HTR2C, IL13RA2, LRCH2                                                                                                                                                                                                                                                                                                                                                                                                                                                                                                                                                                                                                                                                                                                                                                                                                                                                                                                                                                                                                                                                                                                                                                                                                                                                                                                                                                                                                                                                                                                    |
| chrX | 139866073 | 150909319 | M14        | ELL2P4, CXorf51B, CXorf51A, MIR513C, MIR513B, MIR513A1, MIR513A2, MIR506, MIR507, MIR508, MIR514B, MIR509-2, MIR509-3, MIR509-1, MIR510, MIR514A1, MIR514A2, MIR514A3, RNU6-382P, FMR1-AS1, FMR1-IT1, FTH1P8, RPL7L1P11, AFF2-IT1, RN7SKP267, RNU7-98P, IDSP1, LINC00893, TMEM185AP1, MAGEA7P, DUTP4, MAGEA8-AS1, LINC00894, MIR2114, XRCC6P2, RNU6-383P, RPL19P21, MIR4330, GPR50-AS1, MIR320D2, RNU6-3P, RBMX2P2, SPANXA2-OT1, RNA5SP516, RN7SKP81, RN7SKP149, PGBD4P6, MTND1P33, HNRNPH1P2, RRM2P4, HNRNCP10, RN7SKP189, CYCSP44, MIR890, MIR888, MIR892A, MIR892B, MIR891B, MIR891A, RNA5SP517, CDR1, SPANXB2, SPANXB1, LDOC1, SPANXC, SPANXA1, SPANXA2, SPANXD, MAGEC3, MAGEC1, MAGEC2, SPANXN4, SPANXN3, SLITRK4, SPANXN2, UBE2NL, SPANXN1, SLITRK2, TMEM257, FMR1, FMR1NB, AFF2, IDS, CXorf40A, MAGEA9B, HSFX2, TMEM185A, MAGEA11, HSFX1, MAGEA9, MAGEA8, CXorf40B, MAMLD1, MTM1, MTMR1, CD99L2, HMGB3, GPR50, VMA21, PASD1, PRRG3, FATE1, CNGA2                                                                                                                                                                                                                                                                                                                                                                                                                                                                                                                                                                                                                                                                                                                                                                                                                                                                                                                                                                                                                                                                         |
| chrX | 153776182 | 155239981 | M14        | ATF4P2, ATF4P1, IKBKGP1, OR3B1P, SNORA36A, SNORA56, HMGN1P37, MIR1184-1, EEF1A1P31, MIR1184-3, MIR1184-2, TMLHE-AS1, AMDP1, DPH3P2, TCEB1P24, TRPC6P, IKBK, CTAG1A, CTAG1B, CTAG2, GAB3, DKC1, MPP1, SMIM9, F8, H2AFB1, F8A1, FUNDC2, MTCP1, CMC4, BRCC3, VBP1, RAB39B, CLIC2, H2AFB2, F8A2, F8A3, H2AFB3, TMLHE, SPRY3, VAMP7, IL9R                                                                                                                                                                                                                                                                                                                                                                                                                                                                                                                                                                                                                                                                                                                                                                                                                                                                                                                                                                                                                                                                                                                                                                                                                                                                                                                                                                                                                                                                                                                                                                                                                                                                                            |
| chrY | 2654895   | 6117053   | M9         | RNASEH2CP1, TOMM22P2, HSFY3P, NAP1L1P2, ZFY-AS1, EEF1A1P41, LINC00278, AGPAT5P1, PRRC2CP1, USP12PY, RNF19BPY, UBE2V1P3, RNU6-303P, SERBP1P2, RNU2-57P, VDAC1P6, EIF4A1P2, KRT18P10, RPL26P37, DLGAP5P1, TTTY23B, SRY, RPS4Y1, ZFY, TGIF2LY, PCDH11Y, TSPY2                                                                                                                                                                                                                                                                                                                                                                                                                                                                                                                                                                                                                                                                                                                                                                                                                                                                                                                                                                                                                                                                                                                                                                                                                                                                                                                                                                                                                                                                                                                                                                                                                                                                                                                                                                      |
| chrY | 6117053   | 8657040   | M9         | FAM197Y9, TSPY11P, TSPY19P, RBMY2GP, LINC00280, TTTY1B, TTTY2B, TTTY21B, TTTY7, TTTY8B, TSPY17P, SRIP3, GOT2P5, ATP5JP1, GPR143P, PRKY, RN7SKP282, RNU6-941P, RNU6-521P, RBMY2HP, TSPY12P, TTTY16, RFTN1P1, TTTY12, ZNF92P1Y, ZNF736P8Y, BPY2DP, ZNF736P7Y, ZNF736P9Y, RBMY2JP, RBMY2KP, TSPY24P, ZNF736P6Y, MTND6P1, MTCYBP1, MTND1P1, MTND2P3, TRIM60P3Y, ZNF736P10Y, LINC00279, TTTY18, TTTY19, TTTY11, TSPY2, AMELY, TBL1Y                                                                                                                                                                                                                                                                                                                                                                                                                                                                                                                                                                                                                                                                                                                                                                                                                                                                                                                                                                                                                                                                                                                                                                                                                                                                                                                                                                                                                                                                                                                                                                                                  |
| chrY | 8657040   | 9325425   | M9         | TSPY6P, TTTY11, OFD1P3Y, CDY3P, USP9YP22, USP9YP4, TCEB1P4, RBMY1A3P, TTTY20, FAM197Y8, FAM197Y7, TSPY7P, FAM197Y6, TSPY4, TSPY8, TSPY3, TSPY1                                                                                                                                                                                                                                                                                                                                                                                                                                                                                                                                                                                                                                                                                                                                                                                                                                                                                                                                                                                                                                                                                                                                                                                                                                                                                                                                                                                                                                                                                                                                                                                                                                                                                                                                                                                                                                                                                  |
| chrY | 9325425   | 9452762   | M9         | TSPY6P, TSPY10, FAM197Y1, FAM197Y3, FAM197Y2, TSPY15P, RBMY3AP                                                                                                                                                                                                                                                                                                                                                                                                                                                                                                                                                                                                                                                                                                                                                                                                                                                                                                                                                                                                                                                                                                                                                                                                                                                                                                                                                                                                                                                                                                                                                                                                                                                                                                                                                                                                                                                                                                                                                                  |
| chrY | 14774297  | 14799392  | M9         | TTY15                                                                                                                                                                                                                                                                                                                                                                                                                                                                                                                                                                                                                                                                                                                                                                                                                                                                                                                                                                                                                                                                                                                                                                                                                                                                                                                                                                                                                                                                                                                                                                                                                                                                                                                                                                                                                                                                                                                                                                                                                           |
| chrY | 14799392  | 26980276  | M4,M9      | AGKP1, NLGN4Y-AS1, MED13P1, CYCSP46, HDHD1P1, STSP1, RNU6-109P, RNU6-184P, SURF6P1, TCEB1P35, FAM41AY1, TUBB1P2, CDY1B, FAM224B, RNA5SP520, RNA5SP521, CLUHP1, BPY2B, TAF9P1, CDY5P, PRYP1, ACTG1P2, USP9YP23, USP9YP27, DAZ3, USP9Y, RNU1-128P, TRAPPC2P3, OFD1P1Y, TCEB1P6, CDY6P, USP9YP7, USP9YP6, CDY7P, USP9YP34, USP9YP32, CDY8P, DAZ4, TCEB1P12, OFD1P2Y, TRAPPC2P8, USP9YP15, DDX3Y, RNU1-95P, USP9YP16, ACTG1P11, PRYP2, TCEB1P26, CDY9P, TAF9P2, CLUHP2, FAM224A, RNA5SP522, RNA5SP523, TUBB1P1, FAM41AY2, TCEB1P13, OFD1P4Y, USP9YP14, RNU1-48P, USP9YP5, UTY, XKRYP1, PRYP5, TCEB1P7, USP9YP1, GPM6BP1, TTTY9B, OFD1P5Y, RAB9AP4, TRAPPC2P7, OFD1P6Y, GPM6BP2, USP9YP2, TCEB1P14, PRYP6, XKRYP2, USP9YP10, USP9YP28, RNU1-41P, OFD1P7Y, MTCYBP2, TTTY14, ZNF839P1, CD24P4, RNU6-255P, GAPDHP19, BCORP1, TXLNG2P, TMSB4Y, RCC2P2, ZNF886P, VCY, ZNF885P, VCY1B, TTTY10, TBL1Y1, HSFY4P, NLGN4Y, GAPDHP17, TMEM167AP1, TOMM22P1, NEFLP1, RBMY2EP, CDY2B, RBMY2TP, TSPY14P, CDY2A, RBMY1HP, HSFY1, HSFY2, TTTY13, TCEB1P5, CDY10P, USP9YP3, USP9YP8, CDY11P, KDM5D, RBMY2AP, OFD1P8Y, HSFY5P, USP9YP17, CDY12P, TCEB1P15, TTTY6B, TSPY23P, RBMY2UP, RBMY1KP, TTTY5, TSPY22P, RBMY2FP, TTTY25P, TSPY21P, TTTY6, TCEB1P8, CDY13P, USP9YP24, HSFY7P, OFD1P9Y, RBMY2BP, RBMY2WP, TTTY17A, ZNF736P11Y, TTTY4, EIF1AY, TRIM60P8Y, ZNF736P3Y, TRIM60P9Y, PPP1R12BP2, REREP1Y, OFD1P10Y, HSFY6P, USP9YP18, CDY14P, RPS4Y2, Cyorf17, RBMY1B, TCEB1P16, PRYP3, XKRYP3, USP9YP25, USP9YP29, RBMY1A1, RNU1-97P, RAB9AP1, TRAPPC2P9, OFD1P11Y, TCEB1P9, CDY15P, XKRYP4, USP9YP13, USP9YP11, USP9YP12, RNU1-86P, RAB9AP5, TTTY15, CDY4P, TRAPPC2P10, OFD1P12Y, TCEB1P10, CDY17P, USP9YP35, USP9YP31, CDY18P, GOLGA6L11P, DNMI2P4, CSPG4P2Y, CSPG4P3Y, RBMY1E, GOLGA2P2Y, RN7SL818P, UBE2Q2P4Y, LINC00265-2P, C1CP2, LINC00266-2P, RBMY2XP, CASKP1, TTTY17B, TRIM60P5Y, ZNF736P12Y, SFPQP1, TTTY4B, TAB3P1, DPPA2P1, PSMA6P1, KALP, TRIM60P10Y, ZNF736P2Y, TRIM60P11Y, PNPLA4P1, RBMY1D, PRY2, RBMY1F, RBMY1J, PRY, BPY2, DAZ1, DAZ2 |



| Supplementary Table S7 |          |          |         |                                                                                                                                                                                                                                                                                                                                                                                                                                                                                                                                                                                                                                                                                                                                                                                                                                                                                                                                                                                                                                                                                                                                                                                                                                                                                                                                                                                                                                                                                                                                                                                                                                                                                                                                                                                                                                                                                                                                                                                                                                                                                                                                                                                                                                                                                          |
|------------------------|----------|----------|---------|------------------------------------------------------------------------------------------------------------------------------------------------------------------------------------------------------------------------------------------------------------------------------------------------------------------------------------------------------------------------------------------------------------------------------------------------------------------------------------------------------------------------------------------------------------------------------------------------------------------------------------------------------------------------------------------------------------------------------------------------------------------------------------------------------------------------------------------------------------------------------------------------------------------------------------------------------------------------------------------------------------------------------------------------------------------------------------------------------------------------------------------------------------------------------------------------------------------------------------------------------------------------------------------------------------------------------------------------------------------------------------------------------------------------------------------------------------------------------------------------------------------------------------------------------------------------------------------------------------------------------------------------------------------------------------------------------------------------------------------------------------------------------------------------------------------------------------------------------------------------------------------------------------------------------------------------------------------------------------------------------------------------------------------------------------------------------------------------------------------------------------------------------------------------------------------------------------------------------------------------------------------------------------------|
| SCNA loss              | start    | end      | samples | genes                                                                                                                                                                                                                                                                                                                                                                                                                                                                                                                                                                                                                                                                                                                                                                                                                                                                                                                                                                                                                                                                                                                                                                                                                                                                                                                                                                                                                                                                                                                                                                                                                                                                                                                                                                                                                                                                                                                                                                                                                                                                                                                                                                                                                                                                                    |
| chr1                   | 69090    | 1290532  | M9      | OR4F5, OR4F29, OR4F16, SAMD11, NOC2L, KLHL17, PLEKHN1, C1orf170, HES4, ISG15, AGRN, RNF223, C1orf159, TLL10, TNFRSF18, TNFRSF4, SDF4, B3GALT6, FAM132A, UBE2J2, SCNN1D, ACAP3, PUSL1, CPSF3L, GLTPD1, TAS1R3, DVL1, MXRA8, C1CP27, RNU6-1100P, C1CP7, WBP1LP7, MTND1P23, MTND2P28, MTATP8P1, MTATP8P1, WBP1LP6, C1CP3, RNU6-1199P, FAM87B, LINC00115, LINC01128, FAM41C, TUBB8P11, MIR200B, MIR200A, MIR429, TLL10-AS1                                                                                                                                                                                                                                                                                                                                                                                                                                                                                                                                                                                                                                                                                                                                                                                                                                                                                                                                                                                                                                                                                                                                                                                                                                                                                                                                                                                                                                                                                                                                                                                                                                                                                                                                                                                                                                                                   |
| chr1                   | 1290623  | 2116137  | M9      | MXRA8, AURKA1P1, CCN2L, MRPL20, ANKRD65, TMEM88B, VWA1, ATAD3C, ATAD3B, ATAD3A, TMEM240, SSU72, C1orf233, MIB2, MMP23B, CDK11B, SLC35E2B, CDK11A, SLC35E2, NADK, GNB1, CALML6, TMEM52, C1orf222, GABRD, PRKCZ, C1orf86, RN7SL657P, MMP23A                                                                                                                                                                                                                                                                                                                                                                                                                                                                                                                                                                                                                                                                                                                                                                                                                                                                                                                                                                                                                                                                                                                                                                                                                                                                                                                                                                                                                                                                                                                                                                                                                                                                                                                                                                                                                                                                                                                                                                                                                                                |
| chr1                   | 2116360  | 3670805  | M9      | PRKCZ, C1orf86, SKI, MORN1, RER1, PEX10, PLCH2, PANK4, HES5, TNFRSF14, FAM213B, MMEL1, TTC34, ACTRT2, PRDM16, ARHGEF16, MEGF6, TPRG1L, WRAP73, TP73, CCDC27, LINC00982, MIR551A, TP73-AS1                                                                                                                                                                                                                                                                                                                                                                                                                                                                                                                                                                                                                                                                                                                                                                                                                                                                                                                                                                                                                                                                                                                                                                                                                                                                                                                                                                                                                                                                                                                                                                                                                                                                                                                                                                                                                                                                                                                                                                                                                                                                                                |
| chr1                   | 3672020  | 17961420 | M9      | HNRNCP5, RNU6-771P, RNA5SP41, RNU6-1265P, TBCAP2, TMEM51-AS1, CHCHD2P6, RNU7-179P, TBC1D3P6, ARHGEF19-AS1, ANO7P1, MT1XP1, CROCCP3, RNU1-1, CROCCP2, MST1P2, RNU1-3, EIF1AXP1, ESPNP, RNU1-4, CROCCP4, MST1L, MIR3675, RNU1-2, MIR3972, PADI6, CCDC27, SMIM1, LRRC47, CEP104, DFFB, C1orf174, AJAP1, NPHP4, KCNAB2, CHD5, RPL22, RNF207, ICMT, HES3, GPR153, ACOT7, HES2, ESPN, TNFRSF25, PLEKHG5, NOL9, TAS1R1, ZBTB48, KLHL21, PHF13, THAP3, DNAJC11, CAMTA1, VAMP3, PER3, UTS2, TNFRSF9, PARK7, ERRF1, SLC45A1, RERE, ENO1, CA6, SLC2A7, SLC2A5, GPR157, H6PD, SPSB1, SLC25A33, TMEM201, PIK3CD, C1orf200, CLSTN1, CTNBP1, LZIC, NMNAT1, RBP7, UBE4B, RN7SL574P, LINC01134, KIF1B, MIR4417, MIR4689, LINC00337, MIR4252, RNU6-731P, RNU1-8P, CAMTA1-IT1, RNU1-7P, RN7SL729P, RNU6-991P, RPL7P11, RPL7P7, ENO1-IT1, ENO1-AS1, RNU6-304P, HMGN2P17, RN7SL451P, MIR34A, RNA5SP40, RN7SKP269, MIR5697, PGAM1P11, RNU6-828P, MIR1273D, RNU6-37P, RN7SL731P, RN7SL721P, RN7SL614P, HSPE1P24, CFL1P6, MTOR-AS1, RNU6-537P, RNU6-291P, RPL39P6, UBE2V2P3, NPAA-AS1, RNU5E-1, RNU5E-4P, RN7SL649P, RNU6-777P, MIR4632, SNORA59A, RNU6ATAC18P, RNU6-1072P, PRAMEF23, PRAMEF25, PGD, APITD1, APITD1-CORT, CORT, DFFA, PEX14, CAS21, C1orf127, TARDBP, MASP2, SRM, EXOSC10, MTOR, ANGPL7, UBIAD1, PTCHD2, FBXO2, FBXO4, FBXO6, MAD2L2, DRAXIN, AGTRAP, C1orf167, MTHFR, CLCN6, NPAA, NPPB, KIAA2013, PLOD1, MFN2, MIIP, TNFRSF8, TNFRSF1B, VPS13D, DHRS3, AADACL4, AADACL3, C1orf158, PRAMEF12, PRAMEF1, PRAMEF11, HNRNPCL1, PRAMEF2, PRAMEF4, PRAMEF10, PRAMEF7, PRAMEF6, PRAMEF22, PRAMEF26, PRAMEF3, PRAMEF5, PRAMEF8, PRAMEF9, PRAMEF13, PRAMEF18, PRAMEF16, PRAMEF21, PRAMEF15, PRAMEF14, PRAMEF19, PRAMEF17, PRAMEF20, LRRC38, PDPN, PRDM2, KAZN, TMEM51, C1orf195, FHAD1, EFHD2, CTRC, CELA2A, CELA2B, CASP9, DNAJC16, AGMAT, DD12, RSC1A1, PLEKHM2, SLC25A34, TMEM82, FBLIM1, SPEN, ZBTB17, C1orf64, HSPB7, CLCNKA, CLCNKB, FAM131C, EPHA2, ARHGEF19, C1orf134, RSG1, FBXO42, SZRD1, SPATA21, NECAP2, FAM231B, NBPF1, FAM231A, FAM231C, CROCC, MFAP2, ATP13A2, SDHB, PADI2, PADI1, PADI3, PADI4, RCC2, ARHGEF10L                                                                                                                                                                          |
| chr1                   | 17961420 | 19168284 | M14_M9  | ARHGEF10L, ACTL8, IGSF21, KLHDC7A, PAX7, TAS1R2                                                                                                                                                                                                                                                                                                                                                                                                                                                                                                                                                                                                                                                                                                                                                                                                                                                                                                                                                                                                                                                                                                                                                                                                                                                                                                                                                                                                                                                                                                                                                                                                                                                                                                                                                                                                                                                                                                                                                                                                                                                                                                                                                                                                                                          |
| chr1                   | 19168284 | 28599091 | M9      | USP48, MIR4695, MIR1290, RNU6-1099P, RN7SL85P, RN7SL277P, RNU4-28P, RPS14P3, RN7SL304P, UBXN10-AS1, LINC01141, RPS4XP4, PINK1-AS, RNU7-200P, MIR1256, RPS15AP6, HSPE1P27, PPP1R11P1, NBPF2P, HS6T1P1, CROCCP5, PFN1P10, RN7SL421P, RN7SL386P, RNU6-1022P, RN7SL768P, RN7SL186P, RNU6-776P, LINC00339, CDC42-IT1, MIR4418, ZBTB40-IT1, MIR4684, MIR4253, MIR3115, MIR4419A, RNU6-514P, RNU6-135P, RN7SL532P, RN7SL24P, MIR378F, RN7SL857P, RNU6-1208P, MIR4425, SDHDp6, RNU6-1171P, SNRPPF2, MIR3917, RNU6-110P, RN7SL490P, DPPA2P2, MIR1976, RN7SL679P, RN7SL501P, RN7SL165P, OSTCP2, CHCHD3P3, NPM1P39, SNRPEP7, RNU6-48P, RNU6-949P, CHMP1A1P1, RNU6-424P, RPEP3, RNU6-1245P, SCARNA1, RN7SL559P, SPCS2P4, RNU6-176P, RNU7-29P, LDLRAD2, HSPG2, CELA3B, CELA3A, CDC42, WNT4, ZBTB40, EPHA8, C1QA, C1QC, C1QB, EPHB2, LACTBL1, C1orf234, KDM1A, LUZP1, HTR1D, HNRNRP, ZNF436, C1orf213, TCEA3, ASAP3, E2F2, ID3, MDS2, RPL11, TCEB3, PITHD1, LYPLA2, GALE, HMGCL, FUCA1, CNR2, PNRC2, SRSF10, MYOM3, IL22RA1, INFLN1, GRHL3, STPG1, NIPAL3, RCAN3, NCMAP, SRRM1, CLIC4, RUNX3, SYF2, C1orf63, RHD, TMEM50A, RHCE, TMEM57, LDLRAP1, MAN1C1, SEPN1, MTRF1L, AUNIP, PAQR7, STMN1, PAFAH2, EXTL1, SLC30A2, TRIM63, PKD1L1, FAM110D, ZNF593, CNKSR1, CATSPER1, CEP85, SH3BGR3, UBXN11, CD52, AIM1L, ZNF683, LIN28A, DHDDS, HMGN2, RPS6KA1, ARID1A, PIGV, ZDHHC18, SFN, GPN2, GPATCH3, NUDC, NR0B2, C1orf172, TRNP1, FAM46B, SLC9A1, WDTC1, TMEM222, SYTL1, MAP3K6, FCN3, CD1642, GPR3, WASF2, HADC1, FGR, IFI6, FAM76A, STX12, PPP1R8, THEMIS2, RPA2, SMPDL3B, XKR8, EYA3, PTAFR, DNAJC8, ATP1F1, SESN2, TAS1R2, ALDH4A1, IFFO2, UBR4, EMC1, MRTO4, AKR7L, AKR7A, AKR7A2, PQLC2, CAP2C, MINOS1, MINOS1-NBL1, NBL1, HTR6, TMCO4, RFR186, OTUD3, PLA2G2E, PLA2G2A, PLA2G5, PLA2G2D, PLA2G2F, PLA2G2C, UBXN10, VWA5B1, CAMK2N1, MUL1, FAM43B, CDA, PINK1, DDOST, KIF17, SH2D5, HP1BP3, EIF4G3, ECE1, NBPF3, ALPL, RAPIGAP                                                                                                                                                                                                                                                                                                                                                                       |
| chr1                   | 28599091 | 29528557 | M16_M9  | RNU6ATAC27P, SNHG3, SNORA73B, PRDX3P2, SNHG12, SNORD99, RNU11, SESN2, MED18, PHACTR4, RCC1, TRNAU1AP, TAF12, RAB42, GMEB1, YTHDF2, OPRD1, EPB41, TMEM200B, SRSF4, MECR                                                                                                                                                                                                                                                                                                                                                                                                                                                                                                                                                                                                                                                                                                                                                                                                                                                                                                                                                                                                                                                                                                                                                                                                                                                                                                                                                                                                                                                                                                                                                                                                                                                                                                                                                                                                                                                                                                                                                                                                                                                                                                                   |
| chr1                   | 29528557 | 45111081 | M9      | CCDC24, C1orf50, CAP1, CCDC23, SLC6A9, ERMAP, ZNF691, SLC2A1, PPT1, FAM183A, KLF17, EBNA1BP2, DMAP1, RLF, TMCO2, WDR65, ZMPSTE24, COL9A2, TMEM125, ER13, C1orf210, TIE1, MATN1-AS1, MIR4420, RN7SKP91, SNORD103A, SNORD103B, SNORD85, SEPW1P, RNU6-40P, MIR4254, MIR5585, MTRMR9L, MPL, GAPDHP20, LRRC37A12P, RNF220, RN7SL122P, MIR3605, RN7SKP16, TLR12P, HSPD1P14, SMAP2, CDC20, RNA5SP42, MIR552, EFCAB14P1, RN7SL136P, RN7SL503P, RPL5P4, ZMYM4-AS1, RNY5P1, RN7SL281P, RN7SL131P, UBE2V2P4, RNU4-27P, FTLP18, MIR4255, RNU6-636P, RNA5SP43, RPS29P6, ELOVL1, LINC01137, MIR5581, FTH1P1, ACTN4P2, RNU6-584P, RNU6-510P, MIR3659, RNU6-753P, RNU6-605P, RNU6-608P, RNA5SP44, HSPE1P8, OXCT2P1, ZFP69B, PPIEL, SNORA55, RNU7-121P, ZFP69, RNU6-1237P, GTF2F2P2, MED8, NFYC-AS1, MIR30E, MIR30C1, EXO5, RN7SL326P, TMEM53, UBE2V1P8, RNA5SP45, HNRNPFP1, TMSB4XP1, RNU6-536P, ZNF684, ATP6V1E1P1, SLC2A1-AS1, RNU6-880P, RNU6-870P, RNA5SP46, SZT2, SZT2-AS1, HYI-AS1, KDM4A-AS1, RNU6-1058P, SHMT1P1, RIMS3, KRT8P47, RN7SL479P, OOSP1P1, ER13-IT1, RNU6-369P, MIR5584, NFYC, HYI, KCNQA4, PTPRF, CITED4, CTPS1, SLFNL1, SCMH1, KDM4A, FOXO6, EDN2, HIVEP3, GUCA2B, GUCA2A, FOXJ3, RIMKLA, ZMYND12, PPCS, ST3GAL3, CCDC30, PPIH, YBX1, CLDN19, LEPRE1, ARTN, IPO13, DPH2, ATP6V0B, B4GALT2, MECR, PTPRC, MATN1, LAPTM5, SDC3, PUM1, NKAIN1, SNRNP40, ZCCHC17, FABP3, SERINC2, TINAGL1, HCRT1R1, PEF1, COL16A1, BAI2, SPOCD1, PTP4A2, KHDRBS1, TMEM39B, KPNA6, TXLNA, CCDC28B, IQCC, CDC28B, TMEM234, EIF31, FAM167B, LCK, HDAC1, MARCKSL1, TSSK3, FAM229A, BSDC1, ZBTB8B, ZBTB8A, ZBTB80S, RBBP4, SYNC, KIAA1522, YARS, S100PBP, FNDCC5, HPCA, TMEM54, RNF19B, AK2, ADC, TRIM62, ZNF362, A3GALT2, PHC2, ZSCAN20, CSMD2, HMG8A, C1orf94, SMIM12, GJB5, GJB4, GJB3, GJA4, DLGAP3, ZMYM6NB, ZMYM6, ZMYM1, SFPQ, ZMYM4, KIAA0319L, NCDN, TFAF2E, PSMB2, R1O1f216, CLSPN, AGO4, AGO1, AGO3, TEK2, ADPRHL2, COL8A2, TRAPPC3, MAP7D1, THRAP3, SH3D21, EVA1B, STK40, LSM10, SPC81, MRPS15, CSF3R, GRIK3, ZC3H12A, MEAF6, SNIP1, DNALI1, GNL2, RSP01, C1orf109, CDCA8, EPHA10, MANEAL, YRDC, C1orf122, MTF1, INPP5B, SF3A3, FH3L3, UTP11L, POU3F1, RRAOC, MYCBP, GJA9, RHBOL2, AKIRIN1, NDUFS5, MACF1, KIAA0754, BMP8A, PABPC4, HEYL, NT5C1A, HPCAL4, PPIE, BMP8B, OXCT2, TRIT1, MYCL, MFSO2A |
| chr1                   | 45111081 | 45268825 | M1_M9   | RNF220, TMEM53, C1orf228, RNU5F-1, RNU5D-1, SNORD55, SNORD46, SNORD38A, SNORD38B, RPS15AP11, KIF2C, RPS8, BEST4, PLK3                                                                                                                                                                                                                                                                                                                                                                                                                                                                                                                                                                                                                                                                                                                                                                                                                                                                                                                                                                                                                                                                                                                                                                                                                                                                                                                                                                                                                                                                                                                                                                                                                                                                                                                                                                                                                                                                                                                                                                                                                                                                                                                                                                    |
| chr1                   | 45268825 | 55352921 | M9      | RNU6-1026P, RNU6-1253P, CCDC163P, PHBP12, MRPS6P2, MIR4421, CFL1P2, RNU6-877P, RNU6-1281P, CALR4P, GAPDHP51, SLC25A6P3, MMACHC, MIR761, TSEN15P2, RNA5SP48, RN7SL290P, TXNDC12-AS1, RN7SL788P, PDCL3P6, DNAJC19P7, PRDX1, ANAPC10P1, PLA2G12AP1, EEF1G7P, NDUFS5P3, RN7SL62P, RNU2-30P, RNU6-969P, MIR1273G, MIR5095, MIR1273G, TUBBP10, HIGD1AP11, SLC25A3P1, RNU7-95P, AKR1A1, HNRNPA3P12, MIR4781, HNRNPA1P63, NASP, CCDC17, GPBP1L1, TMEM69, IPP, MAST2, PIK3R3, TSPAN1, POMGNT1, RNU5E-6P, RNA5SP47, CCN1P1P1, MRPS17P1, MRPS17P1, MRPS17P1, RNP51AP10, TMA16P2, LINC00505, MKNK1-AS1, EFCAB14-AS1, CYP4Z2P, CYP4A26P, CYP4A43P, CYP4A27P, CYP4A44P, CYP4A22-AS1, MTND1P34, LINC00853, FOXD2-AS1, RPL21P2A, ATP6V0E1P4, CYP46A4P, SKINTL, PPP1R8P1, RNU6-723P, RNU4-61P, AGBL4-IT1, ZNF859P, MTND2P29, HMG81P45, FCF1P6, LURAP1, RADS4L, LRRC41, UQCRR, HNSUN4, FAAH, DMBX1, PLK3, KCNKC, MKNK1, TCTE1X104, BTBD19, PTCH2, MOB3C, ATPAF1, EIF2B3, EFCAB14, TEX38, CYP4B1, HECTD3, CYP4A11, CYP4X1, CYP4Z1, CYP4A22, UROD, PDZK1P1, TAL1, STIL, CMPK1, FOXE3, FOXD2, TRABD2B, SLC5A9, ZSWIM5, HPDL, SPATA6, AGBL4, BEND5, MUTYH, ELAVL4, DMRTA2, FAF1, CDKN2C, C1orf185, RNF11, TTC39A, TOE1, EPS15, TESK2, OSBPL9, NRD1, RAB3B, TXNDC12, KTI12, BTF3L4, ZFYVE9, CC2D1B, ORC1, PRPF38A, ZCCHC11, GPX7, FAM159A, COA7, ZYG11B, ZYG11A, ECHDC2, SCP2, PODN, SLC1A7, CPX2, C1orf123, MAGOH, LRMB, DRMBT1, BLSN1, NDC1, YIPF1, DIO1, HSPB11, LRRC42, LDLRAD1, TMEM59, TCEANC2, CDCP2, CYB5R1, MRPL37, SSBP3, SSBP3-AS1, ACOT11, FAM151A, MROH7, MROH7-TTC4, TTC4, PARS2, TTC22, C1orf177, DHCR24                                                                                                                                                                                                                                                                                                                                                                                                                                                                                                                                                                                                                                                                                         |
| chr1                   | 55446464 | 66827386 | M9      | GYG1P3, MIR4422, GOT2P1, RN7SKP291, RNU6-830P, PIGOP1, RPL21P23, RPS20P5, DAB1-AS1, HNRNPA1P6, RPS26P15, RN7SL713P, LINC01135, PHBP3, MIR4711, RN7SL475P, PGBD4P8, RNU6-414P, RNU6-1177P, LAMTOR5P1, RN7SL180P, MIR3116-2, MIR3116-1, PIGPP2, RPS15AP7, RNU6-371P, RNA5SP49, LINC00466, RN7SL488P, RNU7-123P, RN7SL130P, CFL1P3, RNU6-809P, RNU7-62P, MIR4794, SLC2A3P2, RNU6-1178P, MIR3671, MIR101-1, MRPS21P1, COX6CP13, RNU2-15P, RN7SL854P, RNU4-88P, TMEM61, BSND, PCSK9, RNU6-1178P, PRKAA2, C1orf168, C8A, C8B, DAB1, OMA1, TACSTD2, MYSM1, JUN, FGGY, HOOK1, CYP2J2, C1orf87, NFIA, TM2D1, INADL, L1TD1, KANK4, USP1, DOCK7, ANGPL3, ATG4C, FOXD3, ALG6, ITGB3BP, EFCAB7, DLEU2L, PGM1, ROR1, UBE2U, CACHD1, RAVER2, JAK1, AK4, DNAJC6, LEPR, LEPROT, PDE4B                                                                                                                                                                                                                                                                                                                                                                                                                                                                                                                                                                                                                                                                                                                                                                                                                                                                                                                                                                                                                                                                                                                                                                                                                                                                                                                                                                                                                                                                                                                     |

|       |           |           |         |                                                                                                                                                                                                                                                                                                                                                                                                                                                                                                                                                                                                                                                                                                                                                                                                                                                                                                                                                                                                                                                                                                                                                                                                                                                                                                                                                                                                                                                                                                                                                                                                                                                                                                                                                                                                                                                                                                                                                                                                                                                                                                                                                                                                                                                                                                                                                                                                                                                                                                                                                                                                                                                                                                                                                                                                                                                                                                                                                                                                                                                                                                                                                                                                                                                                                                                                                                                                                                                                                                                                       |
|-------|-----------|-----------|---------|---------------------------------------------------------------------------------------------------------------------------------------------------------------------------------------------------------------------------------------------------------------------------------------------------------------------------------------------------------------------------------------------------------------------------------------------------------------------------------------------------------------------------------------------------------------------------------------------------------------------------------------------------------------------------------------------------------------------------------------------------------------------------------------------------------------------------------------------------------------------------------------------------------------------------------------------------------------------------------------------------------------------------------------------------------------------------------------------------------------------------------------------------------------------------------------------------------------------------------------------------------------------------------------------------------------------------------------------------------------------------------------------------------------------------------------------------------------------------------------------------------------------------------------------------------------------------------------------------------------------------------------------------------------------------------------------------------------------------------------------------------------------------------------------------------------------------------------------------------------------------------------------------------------------------------------------------------------------------------------------------------------------------------------------------------------------------------------------------------------------------------------------------------------------------------------------------------------------------------------------------------------------------------------------------------------------------------------------------------------------------------------------------------------------------------------------------------------------------------------------------------------------------------------------------------------------------------------------------------------------------------------------------------------------------------------------------------------------------------------------------------------------------------------------------------------------------------------------------------------------------------------------------------------------------------------------------------------------------------------------------------------------------------------------------------------------------------------------------------------------------------------------------------------------------------------------------------------------------------------------------------------------------------------------------------------------------------------------------------------------------------------------------------------------------------------------------------------------------------------------------------------------------------------|
| chr1  | 66827386  | 103347321 | M14,M9  | MIR3117, RNU6-586P, RNU4ATAC4P, RNU6-387P, RNU6-1031P, RN7SL392P, HNRNPC9P, RNU7-80P, GNG12-AS1, ARL5AP3, CTBP2P8, MIR1262, RPS7P4, COX6B1P7, TCEB1P18, TXNP2, RN7SL538P, PIN1P1, RN7SL242P, CASP3P1, ZRANB2-AS1, MIR186, ZRANB2-AS2, NEGR1-IT1, GD12P2, RPL31P12, RNU6-1246P, KRT8P21, RN7SKP19, RNA5SP50, RNU4ATAC8P, RNU6-622P, RNU6-503P, SNORD45C, SNORD45A, SNORD45B, TP1P1, RNU6-161P, RNU7-8P, RNA5SP20, RN7SL370P, RNA5SP21, NSRP1P1, HSPE1P25, NEXN-AS1, RNU6-1102P, RNA5SP22, RNFT1P2, RNA5SP23, PSAT1P3, ADH5P2, HMG6P18, HNRNPA1P64, MTND2P30, RPL7P10, RN7SKP247, HNRNPA3P14, MED28P8, ST13P20, TLL7-IT1, UOX, SPATA1, MIR4423, RNA5SP51, CLCA3P, LINC01140, RNA5SP52, RN7SL583P, RPL36AP10, RNU6-125P, TCEB1P19, PTGES3P1, CAPNS1P1, GBP1P1, RN7SKP272, GEMIN8P4, RNU6-695P, PHKA1P1, RPL5P6, FEN1P1, HSP90B3P, RN7SL653P, RN7SL235P, LPCAT2B, SETSP, GAPDHP46, PRKAR1AP, ACTBP12, RN7SL824P, HMG3B3P, RNU4-59P, CCNJ2P, SNORD21, SNORA66, RNU6-970P, RN7SL692P, RNU6-210P, RN7SKP123, RNA5SP53, MIR760, CHCHD2P5, MTND4P11, RN7SL440P, GAPDHP29, LINC01057, KATNB1P, RNU2, PGBD4P7, MIR378G, RNU1-130P, UBE2WP1, EEF1A1P11, RN7SL831P, NDUFS5P2, RPL7P9, RN7SKP270, DPYD-AS1, DPYD-IT1, SEC63P1, RPL26P9, DPYD-AS2, MIR137HG, NFU1P2, HMG3B3P10, RNU4-75P, RNU6-750P, RNU6-1318P, BR13P1, MIR553, BCAS2P2, HNRNPA1P68, PPIAP7, RNU6-965P, RNU6-352P, DNAJA1P5, PDE4B, SGIP1, TCTEX1D1, INSL5, WDR78, MIER1, SLC35D1, C1orf141, IL2R3, IL12RB2, SERBP1, GADD45A, GNG12, DIRAS3, WLS, RPE65, DEPDC1, LRRCC7, LRRCC40, SRSF11, ANKRD13C, HHLA3, CTH, PTGER3, ZRANB2, NEGR1, LRR1Q3, FPGT, FPGT-TNNI3K, TNNI3K, LRRCC53, C1orf173, CRYZ, TYW3, LHX8, SLC44A5, ACADM, RABGGT8, MSH4, ASB17, ST6GALNAC3, ST6GALNAC5, PIGK, AK5, ZZZ3, USP33, FAM73A, NEXN, FUBP1, DNAJB4, GIPC2, PTGFR, IFI44L, IFI44, ELTD1, LPHN2, TLL7, PRKACB, SAMD13, DNASE2B, RPF1, GNG5, CTBS, C1orf180, SSX2IP, LPAR3, MCOLN2, WDR63, MCOLN3, SYDE2, C1orf52, BCL10, DDAH1, CYR61, ZNHIT6, COL24A1, ODF2L, CLCA2, CLCA1, CLCA4, SH3GLB1, HS2ST1, LMO4, PKN2, GTF2B, CCBL2, RBMXL1, GBP3, GBP1, GBP2, GBP7, GBP4, GBP5, GBP6, LRRCC8, LRRCC8C, LRRCC8D, ZNF326, BARHL2, ZNF644, HFM1, CDC7, TGFBR3, BRD7, EPHX4, BTBD8, KIAA1107, C1orf146, GLMN, RPAP2, GF11, EVI5, RPL5, FAM69A, MTF2, TMED5, CCDC18, DR1, FNBP1L, BCAR3, DNTT1P2, GCLM, ABC8A, ARHGAP29, ABCD3, F3, SLC44A3, CNN3, ALG14, TMEM56, TMEM56-RWDD3, RWDD3, PTBP2, DPYD, SNX7, PALMD, FRRS1, AGL, SLC35A3, HIAT1, SASS6, TRMT13, LRRCC39, DBT, RTCA, CDC14A, GPR88, VCAM1, EXTL2, SLC30A7, DPH5, S1PR1, OLFM3, COL11A1                                                                                                                                                                                                                                                                                                                                                                                                                                                                                                                                                                                                                                                                                                                                                                                                                                                                                                                                                                 |
| chr1  | 103347321 | 103354159 | M14     | COL11A1                                                                                                                                                                                                                                                                                                                                                                                                                                                                                                                                                                                                                                                                                                                                                                                                                                                                                                                                                                                                                                                                                                                                                                                                                                                                                                                                                                                                                                                                                                                                                                                                                                                                                                                                                                                                                                                                                                                                                                                                                                                                                                                                                                                                                                                                                                                                                                                                                                                                                                                                                                                                                                                                                                                                                                                                                                                                                                                                                                                                                                                                                                                                                                                                                                                                                                                                                                                                                                                                                                                               |
| chr1  | 103481223 | 107691075 | M9      | RN7SKP285, ACTG1P4, AMYP1, FTL1P7, SEPT2P1, SOD2P1, COL11A1, RNPC3, AMY2B, AMY2A, AMY1A, AMY1B, AMY1C, PRMT6, NTNG1                                                                                                                                                                                                                                                                                                                                                                                                                                                                                                                                                                                                                                                                                                                                                                                                                                                                                                                                                                                                                                                                                                                                                                                                                                                                                                                                                                                                                                                                                                                                                                                                                                                                                                                                                                                                                                                                                                                                                                                                                                                                                                                                                                                                                                                                                                                                                                                                                                                                                                                                                                                                                                                                                                                                                                                                                                                                                                                                                                                                                                                                                                                                                                                                                                                                                                                                                                                                                   |
| chr1  | 107691075 | 115836309 | M14,M9  | VAV3-AS1, SLC25A24P1, NBPF5P, SLC25A24P2, ST13P21, SPATA4, RANP5, SCARNA2, RNU7-122P, RNU6V, MIR197, RPL7P8, NDUFA5P10, KCNC4-AS1, LAMTOR5-AS1, CYPM, NRBF2P3, OR1111P, CCNT2P1, RNA5SP54, CHIAPI1, CHIAPI2, CHIAPI3, HIGD1AP12, PGCP1, UBE2FP3, RNU6-792P, LINC01160, KRT18P57, RNU6-151P, FAM212B-AS1, KCND3-IT1, KCND3-AS1, TXNP3, MRPL53P1, RNU7-70P, AKR7A2P1, SLC16A1-AS1, RLIMP2, MTND5P20, AP4B1-AS1, EIF2S2P5, PKMP1, RN7SL432P, NR1H5P, NTNG1, VAV3, SLC25A24, NBPF4, NBPF6, FAM102B, HENMT1, PRPF38B, FNDC7, STXB3P, AKNAD1, GSPM2, CLCC1, WDR47, TAF13, TMEM167B, C1orf194, KIAA1324, SARS, CELSR2, PSRC1, MYBPHL, SORT1, PSMA5, SYPL2, ATXN7L2, CYB561D1, AMIGO1, GPR61, GNAI3, GNAT2, AMPD2, GSTM10, GSTM1, GSTM5, GSTM3, EPS8L3, CSF1, AHCYL1, STRIP1, ALX3, UBL4B, SLC6A17, KCNC4, RBM15, SLC16A4, LAMTOR5, PROK1, KCNA10, KCNA2, KCNA3, CD53, LRIF1, DRAM2, CEPT1, DENND2D, CH3L2, CHIA, PIFO, OVGP1, WDR77, ATP5F1, C1orf162, ADORA3, RAP1A, FAM212B, DDX20, KCND3, CTTNBP2NL, WNT2B, ST7L, CAPZA1, MOV10, RHOC, PPM1J, FAM19A3, SLC16A1, LRIG2, MAG3, PHTF1, RSBN1, PTPN22, BCL2L15, AP4B1, DCCLRE1B, HIPK1, OLFML3, SYT6, TRIM33, BCAS2, DENND2C, AMPD1, NRAS, CSDE1, SIKE1, SYCP1, TSHB, TSPAN2, NGF                                                                                                                                                                                                                                                                                                                                                                                                                                                                                                                                                                                                                                                                                                                                                                                                                                                                                                                                                                                                                                                                                                                                                                                                                                                                                                                                                                                                                                                                                                                                                                                                                                                                                                                                                                                                                                                                                                                                                                                                                                                                                                                                                                                                                                                                                                             |
| chr1  | 115836309 | 121313686 | M9      | TCEB1P20, CNOT7P2, RN7SL420P, HNRNPA1P43, ATP1A10S, RNU6-817P, NBP1L4P1, MIR5484C, MIR320B1, GAPDHP64, NEFHPI, FTH1P22, RNA5SP55, MIR942, RPS15AP9, VPS25P1, RNA5SP56, PSMC1P12, WARS2-IT1, RBMX2P3, RPS3AP12, RPL6P2, RNU1-75P, HAO2-IT1, HSD3BP2, GAPDHP23, HSD3BP1, GAPDHP58, GAPDHP32, HSD3BP3, GAPDHP27, HSD3BP4, GAPDHP33, LINC00622, HSD3BP5, NBPF7, PFI1P9, NOTCH2P1, RNU6-465P, HIST2H2DP1, HIST2H2BA, SRGAP2C, EMBP1, NGF, VANGL1, CASQ2, NHLH2, SLC22A15, MAB21L3, ATP1A1, CD58, IGSF3, C1orf137, CD2, PTGFRN, CD101, TTF2, TRIM45, VTCN1, MAN1A2, FAM46C, GDAP2, WDR3, SPAG17, TBX15, WARS2, HAO2, HSD3B2, HSD3B1, ZNF697, HGDH, HMGCS2, REG4, ADAM30, NOTCH2, FAM72B, FCGR1B                                                                                                                                                                                                                                                                                                                                                                                                                                                                                                                                                                                                                                                                                                                                                                                                                                                                                                                                                                                                                                                                                                                                                                                                                                                                                                                                                                                                                                                                                                                                                                                                                                                                                                                                                                                                                                                                                                                                                                                                                                                                                                                                                                                                                                                                                                                                                                                                                                                                                                                                                                                                                                                                                                                                                                                                                                             |
| chr1  | 245775186 | 249212072 | M14     | OR9H1P, HSD17B7P1, OR6R1P, OR2X1P, OR2L9P, OR2L1P, OR2L6P, OR2T32P, OR2M1P, OR2AS2P, OR2AS1P, AHCP9B, MIR3124, RNU6-1205P, CHCHD4P5, RNU6-1283P, SMYD3-IT1, KIF28P, FGFR3P6, MIR3916, RNA5SP82, VN1R17P, VN1R5, OR2W5, GCSAML-AS1, RNU6-691P, OR14L1P, OR3D1P, KIF26B, SMYD3, TFB2M, ANST, SCOPDH, AHCTF1, ZNF670, ZNF695, ZNF669, C1orf229, ZNF124, ZNF496, LRNL3P, OR2K11, GCSAML, OR2C3, OR2G2, OR2G3, OR13G1, OR6F1, OR14A2, OR14K1, OR1C1, OR14A16, OR11L1, TRIM58, OR2W3, OR2T8, OR2A1, OR2L13, OR2L8, OR2AK2, OR2L5, OR2L2, OR2L3, OR2M5, OR2M2, OR2M3, OR2M4, OR2T33, OR2T12, OR2M7, OR14C36, OR2T4, OR2T6, OR2T1, OR2T7, OR2T2, OR2T3, OR2G6, OR2T29, OR2T4, OR2T10, OR2T11, OR2T35, OR2T27, OR1411, LYPD8, SH3PM5, ZNF672, ZNF692, PGBD2                                                                                                                                                                                                                                                                                                                                                                                                                                                                                                                                                                                                                                                                                                                                                                                                                                                                                                                                                                                                                                                                                                                                                                                                                                                                                                                                                                                                                                                                                                                                                                                                                                                                                                                                                                                                                                                                                                                                                                                                                                                                                                                                                                                                                                                                                                                                                                                                                                                                                                                                                                                                                                                                                                                                                                                    |
| chr10 | 93440     | 42827314  | M14     | PTCHD3, RAB18, SFMBT2, DDX10P1, ZEB1-AS1, RNA5SP309, SPTLC1P1, HMG6B1P7, ARMC3, RN7SL825P, RPS4XP11, RNU7-22P, PPIAP31, RPS24P13, RNU6-1244P, C1DP1, AK3P5, CCNY, RN7SL847P, RN7SL398P, LINC00838, RPL23P11, TCEB2P4, PARD3-AS1, SS18L2P1, RNU6-847P, RNU6-193P, PRDX2P2, RN7SL3611, ITH5, HNRU7-77P, ATP6V1G1P4, RNU6-794P, RNU6-1167P, MIR4683, RPL7P37, MTND5P17, MKX, GJD4, FZD8, MSRB2, ARMC4, MTND4P18, NAMPTL, MKNK2P1, ARL6IP1P2, RNU6-811P, ATP8A2P1, RN7SL314P, ANKRD30A, LINC00993, EPC1, PTF1A, C1orf115, C1orf467, TMEM1619P1, VNI1R3P, TACC1P1, MTND1P18, ZNF33BP1, MTRNR2L7, ZNF248, ZNF33AP1, RNU6-795P, EIF3LP3, FXYP2P2, HSD17B7P2, OTUD1, MPP7, KIAA1217, SEPT7P9, ZNF25, RNU6-1118P, C1CP9, ABCD1P2, PABCP1P12, ZNF33A, SLC9B1P3, CCDC7, ACTR3BP5, CHEK2P5, KSR1P1, IGKV1OR10-1, PABCP1P8, ZNF37A, WAC, LINC00999, ARHGAP21, ITGB1, PRTFDC1, ENKUR, BAMBI, C1orf126, LYZL1, THNSL1, GPR158, ITH2, SVIL, MYO3A, NRP1, GAD2, KIN, APBB1P, KIAA1462, PDSS1, ATP5C1, MTPAP, PARD3, AB11, MAP3K8, LYZL2, ZNF438, AB11, MAP3K8, LYZL2, ZNF438, AB11, ANKR26, TAF3, GATA3, YME1L1, ARHGAP12, CELF2, KIF5B, LRSP2, RNA5SP297, RNA5SP298, RN7SL754P, MIR5699, CUL2, IDI2-AS1, RNU7-163P, LINC00200, ADARB2-AS1, LINC00700, RNU6-889P, RNU6-576P, LINC00701, MASTL, PITRM1-AS1, LINC00702, LINC00703, RNU6-163P, LINC00704, LINC00705, AKR1C6P, ACBD5, CREM, USP6NL, AKR1C5P, AKR1C7P, CALML3-AS1, RN7SL445P, ARBF2P5, RN7SKP78, MIR3155A, SDCBPP1, PRKCCQ-AS1, LINC00707, COX6CP17, RNU6-535P, GATA3-AS1, PRPF38AP1, LINC00708, KRT8P37, CHCHD3P1, RNA5SP299, ECHDC3, LINC00709, HSP90A8P7, TCEB1P3, CUX2P1, SFTA1P, PROSER2, LINC00710, CELF2-AS2, CELF2-AS1, PROSER2-AS1, RNU6-1095P, UPF2, MIR548AK, RN7SL232P, HNR7SL198P, RNU6ATAC39P, MIR4480, MIR548Q, RNA5SP300, RPL5A25, SNRPGP5, BTBD7P1, RNU6-6P, RNA5SP301, MIR4293, MIR1265, RNA5SP302, OR7E110P, OR7E26P, OR7E115P, DCCLRE1CP1, GAPDHP45, PPIAP30, FTL1P9, RNU6-1075P, RNU2-18P, VIM-AS1, ST8SI6A-AS1, PRPF38AP2, MIR5111-1, MIR5111-2, SLC39A12-AS1, ARL5B-AS1, AIFM1P1, UBE2V2P1, HMGN1P20, RNA5SP303, MTND2P16, RNU6-1212P, AMD1P1, MIR4675, MTND1P21, EIF4BP2, NPM1P30, NEBL-AS1, LUZP4P1, RNU6-15P, RNMTL1P1, MIR1915, RNU6-306P, HNRNRP1, RNU6-1141P, RN7SKP219, RN7SKP37, ADIPOR1P1, RNU6-413P, RNA5SP304, YWHAZP3, MIR1254-2, MIR603, RNA5SP305, RN7SKP241, GPR158-AS1, RN7SKP220, GPN3P1, HIRAP1, RNA5SP306, RNU6-632P, RNA5SP307, LINC00264, DHTKD1, LINC00202-2, HSPA8P3, RNU6-946P, LINC00202-1, LINC00614, RNU6-490P, RNU2-24P, RNU7-12P, LRRCC37A6, ARMC4P1, RNU6-666P, RNU6-452P, FAM210CP, TRIAP1P1, SEC61A2, TUBB8, RN7SKP132, RPL36AP55, ZNF101P1, RN7SKP39, WAC-AS1, RNU4ATAC6P, TPRKBP1, RNU6-1067P, RNU6-270P, LINC00837, CTCHD3P1, ZMYND11, MIR604, MIR938, RNU6-908P, RNU6-598P, EEF1A1P39, DNMF1P17, GOLGA2P6, RN7SL241P, NIFKP1, HNRNPA1P32, RN7SL63P, SVILP1, NUDT5, DIP2C, PRR26, LARP4B, CDC123, GTPB3A, IDI2, IDI1, WDR37, ADARB2, CAMK1D, PFKF, CCDC3, PITRM1, OPTN, KLF6, AKR1E2, AKR1C1, MCM10, AKR1C2, AKR1C3, AKR1C4, UCN4, UCN3, PHYH, TUBAL3, NET1, CALML5, CALML3, ASB13, FAM208B, GD12, ANKRD16, FBXO18, SEPHS1, IL15RA, BEND7, IL2RA, PRPF18, RBM17, PFKFB3, PRKCQ, FRMD4A, FAM107B, CDFN, HSPA14, SUV39H2, DCCLRE1C, MEIG1, OLAH, ACBD7, C1orf111, RPP38, NMT2, FAM171A1, ITGA8, FAM188A, PTER, C1QL3, RSU1, CUBN, TRDMT1, VIM, ST8SI6A, PTPLA, STAM, TMEM236, MRC1, SLC39A12, CACNB2, NSUN6, ARL5B, MALRD1, PLXDC2, NEBL, C1orf113, CASC10, SKIDA1, MLT10, DNAJC1, EBLN1, COMMD3, COMMD3-BM11, BM11, SPAG6, PIP4K2A |
| chr10 | 42827314  | 47756685  | M11,M14 | CCNYL2, LINC00839, ZNF37BP, FXYP2P1, EIF3LP2, RNU6-1170P, CUBNP1, RSU1P1, DUXAP3, RNU6-885P, MIR5100, ZNF33B, BMS1, RNU6ATAC11P, RNU7-193P, CAP1P2, ZNF32-AS3, ZNF32-AS2, UQCRRP3, TCEB1P30, HNRNPA3P1, LINC00619, LINC00840, LINC00841, RET, EIF2AP4, TMEM72-AS1, CEP164P1, DUXAP4, RSU1P2, CUBNP3, CSYGALNACT2, ANKRD54P1, ANKRD30BP3, MIR3156-1, RNU6-1207P, CUBNP2, OR6D1P, CTGLF10P, FAM21FP, RASGEF1A, RNA5SP310, FRMPD2P2, FXYP4, HNRNP7, CTGLF10P, BMS1P1, RNA5SP311, GLUD1P7, DUSP8P3, CTSLP5, ZNF487, FAM35BP, RN7SL248P, RHEBP1, ZNF239, ZNF485, LINC00842, HNRNPA1P33, RNA5SP312, BMS1P2, GLUD1P8, ZNF32, DUSP8P4, CTSLP7, CXCL12, FAM35DP, RN7SL453P, RHEBP2, AHCYP1, ANTXRPL1, CTGLF11P, FAM25HP, TMEM72, RASSF4, C1orf10, C1orf25, ZNF22, OR13A1, ALOX5, MARCH8, ZFAND4, FAM21C, FAM25E, AGAP4, PTPN20A, SYT15, GPRIN2, NPY4R, ANXA8L1, FAM25B, AGAP10, ANTXRXL, ANXA8L2                                                                                                                                                                                                                                                                                                                                                                                                                                                                                                                                                                                                                                                                                                                                                                                                                                                                                                                                                                                                                                                                                                                                                                                                                                                                                                                                                                                                                                                                                                                                                                                                                                                                                                                                                                                                                                                                                                                                                                                                                                                                                                                                                                                                                                                                                                                                                                                                                                                                                                                                                                                                                                               |
| chr10 | 47756685  | 64572993  | M11     | GDF2, GDF10, PTPN20B, FAM25D, MAPK8, ARHGAP22, WDFY4, SLC9A3P4, CTSLP2, GLUD1P6, DUSP8P2, BMS1P6, RNA5SP313, FRMPD2P1, BMS1P5, RNA5SP314, GLUD1P2, DUSP8P1, CTSLP3, FAM35EP, RN7SL527P, CTGLF12P, RNA5SP315, BMS1P7, PTPN20CP, ARHGAP22-IT1, MIR4294, FAM170B-AS1, C1orf71-AS1, FAM25D, LRRCC18, VSTM4, RNA5SP316, FAM170B, C1orf128, C1orf171, PARGP1, LINC00843, RNA5SP317, SLC9A3P3, SLC9A3P1, DYNC112P1, RMRPP4, RNU7-107P, DRGX, ERCC6, NUTM2HP, CTSLP4, PGBD3, PGGT1BP1, CCDC58P2, ERCC6-PGBD3, MIR605, RSU1P3, PRKG1-AS1, PRKRIRP3, CHAT, SNRPEP8, RNA5SP318, RNU6-687P, NEFMP1, MIR548F1, GAPDHP21, MIR3924, NRP533P3, TPT1P10, FAM133CP, RN7SKP196, LINC00844, TRAF6P1, MIR150P4, LINC00948, SLC18A3, C1orf53, ARL4P, RNU2-72P, LINC00845, OGDHL, RN7SL591P, ALDH7A1P4, PARG, FAM21D, AGAP8, NIMX2B, AGAP7, MSMB, NCOA4, TIMM23, AGAP6, FAM21A, ASAH2, SGMS1, ASAH2B, C1CF, PRKG1, CSTF2, DKK1, MBL2, PCDH15, ANXA8L2, FAM21B, MTRNR2L5, ZWINT, ASAH2C, IPMK, AGAP9, FAM25G, ANXA8, CISD1, UBE2D1, ZNF488, RBP3, TFAM, BICC1, PHYHPL, FAM13C, SLC16A9, CCDC6, A10F40, ANK3                                                                                                                                                                                                                                                                                                                                                                                                                                                                                                                                                                                                                                                                                                                                                                                                                                                                                                                                                                                                                                                                                                                                                                                                                                                                                                                                                                                                                                                                                                                                                                                                                                                                                                                                                                                                                                                                                                                                                                                                                                                                                                                                                                                                                                                                                                                                                                                                                                                   |
| chr10 | 64572993  | 69909868  | M11,M14 | RNU6-543P, TADT1P1, MIR1296, PRELID1P3, JMUJ1C-AS1, MRPL35P2, DBF4P1, RPL17P35, CYP2C61P, ANXA2P3, NEK4P3, MYL6P3, AKR1B10P1, RNU6-1250P, RN7SL394P, DNAJC1P1, RPL12P8, RN7SL220P, POU5F1P5, EGR2, NRBF2, JMJ1C, REEP3, CTNNA3, LRRMT3, DNAJC12, SIRT1, HERC4, MYPN                                                                                                                                                                                                                                                                                                                                                                                                                                                                                                                                                                                                                                                                                                                                                                                                                                                                                                                                                                                                                                                                                                                                                                                                                                                                                                                                                                                                                                                                                                                                                                                                                                                                                                                                                                                                                                                                                                                                                                                                                                                                                                                                                                                                                                                                                                                                                                                                                                                                                                                                                                                                                                                                                                                                                                                                                                                                                                                                                                                                                                                                                                                                                                                                                                                                   |
| chr10 | 69909868  | 69918242  | M14     | RN7SKP202, MYPN                                                                                                                                                                                                                                                                                                                                                                                                                                                                                                                                                                                                                                                                                                                                                                                                                                                                                                                                                                                                                                                                                                                                                                                                                                                                                                                                                                                                                                                                                                                                                                                                                                                                                                                                                                                                                                                                                                                                                                                                                                                                                                                                                                                                                                                                                                                                                                                                                                                                                                                                                                                                                                                                                                                                                                                                                                                                                                                                                                                                                                                                                                                                                                                                                                                                                                                                                                                                                                                                                                                       |
| chr10 | 69918242  | 71265996  | M11,M14 | DDX21, KIAA1279, SRGN, VPS26A, SUPV3L1, HKDC1, HK1, TACR2, TSPAN15, KRT19P4, RNA5SP319, TMEM14D, COX20P1, SNORD98, MIR1254-1, RNU6-697P, RNU6-571P, RN7SL373P, MED28P1, ACTBP14, ATP5G1P7, MYPN, ATOH7, PBLD, HNRNPH3, RUFY2, DNA2, SLC25A16, TET1, CCAR1, STOX1, DDX50                                                                                                                                                                                                                                                                                                                                                                                                                                                                                                                                                                                                                                                                                                                                                                                                                                                                                                                                                                                                                                                                                                                                                                                                                                                                                                                                                                                                                                                                                                                                                                                                                                                                                                                                                                                                                                                                                                                                                                                                                                                                                                                                                                                                                                                                                                                                                                                                                                                                                                                                                                                                                                                                                                                                                                                                                                                                                                                                                                                                                                                                                                                                                                                                                                                               |
| chr10 | 71265996  | 71266584  | M14     | TSPAN15                                                                                                                                                                                                                                                                                                                                                                                                                                                                                                                                                                                                                                                                                                                                                                                                                                                                                                                                                                                                                                                                                                                                                                                                                                                                                                                                                                                                                                                                                                                                                                                                                                                                                                                                                                                                                                                                                                                                                                                                                                                                                                                                                                                                                                                                                                                                                                                                                                                                                                                                                                                                                                                                                                                                                                                                                                                                                                                                                                                                                                                                                                                                                                                                                                                                                                                                                                                                                                                                                                                               |



|       |           |           |         |                                                                                                                                                                                                                                                                                                                                                                                                                                                                                                                                                                                                                                                                                                                                                                                                                                                                                                                                                                                                                                                                                                                                                                                                                                                                                                                                                                                                                                                                                                                                                                                                                                                                                                                                                                                                                                                                                                                                                                                                                                                                                                                                                                                                                                                                                                                                                                                                                                                                                                                                                                                                                                                                                                                                                                                                                                                                                                                                                                                                                                                                                                                                                                                                                                                    |
|-------|-----------|-----------|---------|----------------------------------------------------------------------------------------------------------------------------------------------------------------------------------------------------------------------------------------------------------------------------------------------------------------------------------------------------------------------------------------------------------------------------------------------------------------------------------------------------------------------------------------------------------------------------------------------------------------------------------------------------------------------------------------------------------------------------------------------------------------------------------------------------------------------------------------------------------------------------------------------------------------------------------------------------------------------------------------------------------------------------------------------------------------------------------------------------------------------------------------------------------------------------------------------------------------------------------------------------------------------------------------------------------------------------------------------------------------------------------------------------------------------------------------------------------------------------------------------------------------------------------------------------------------------------------------------------------------------------------------------------------------------------------------------------------------------------------------------------------------------------------------------------------------------------------------------------------------------------------------------------------------------------------------------------------------------------------------------------------------------------------------------------------------------------------------------------------------------------------------------------------------------------------------------------------------------------------------------------------------------------------------------------------------------------------------------------------------------------------------------------------------------------------------------------------------------------------------------------------------------------------------------------------------------------------------------------------------------------------------------------------------------------------------------------------------------------------------------------------------------------------------------------------------------------------------------------------------------------------------------------------------------------------------------------------------------------------------------------------------------------------------------------------------------------------------------------------------------------------------------------------------------------------------------------------------------------------------------------|
| chr11 | 59633864  | 63414006  | M2      | SLC22A25, SLC22A9, HRASLS5, LGALS12, RARRES3, HRASLS2, PLA2G16, AT13, SRD5A3P1, LINC00301, RNU6-933P, RN7SL23P, MIR4488, RPLP0P2, MIR611, MIR1908, RNU6-1243P, NPM1P35, RCC2P6, SNORA57, RNU6-118P, RN7SL119P, RN2U-2P, SNHG1, RN7SL259P, RPL29P22, CCND2P1, TCN1, OOSP1, OOSP2, MS4A3, MS4A2, MS4A6A, MS4A4E, MS4A4A, MS4A6E, MS4A7, MS4A14, MS4A5, MS4A1, MS4A12, MS4A13, MS4A8, MS4A18, MS4A15, MS4A10, CCDC86, PTGDR2, ZP1, PRPF19, TMEM109, TMEM132A, SLC15A3, CD6, CD5, VPS37C, PGA3, PGA4, PGA5, VVCE, DDB1, DAK, CYBS61A3, TMEM138, TMEM216, CPSF7, SDHAF2, PPP1R32, LRRC10B, SYT7, DAGLA, MYRF, TMEM258, FEN1, FADS2, FADS1, FADS3, RAB31L1, BEST1, FTH1, INCENP, SCGB1D1, SCGB2A1, SCGB1D2, SCGB2A2, SCGB1D4, ASRGL1, SCGB1A1, AHNAK, EEF1G, MIR3654, TUT1, MTA2, EML3, ROM1, B3GAT3, GANAB, INTS5, C11orf48, METTL12, C11orf83, UBXN1, LRNR44CL, HNRNPUL2-BSCL2, BSCL2, GNG3, HNRNPUL2, TTC9B, ZBTB3, PRLR2G, TAF6L, TMEM223, TMEM179B, NXF1, STX5, WDR74, SLC3A2, CHRMI1, SLC22A6, SLC22A8, SLC22A24, SLC22A10                                                                                                                                                                                                                                                                                                                                                                                                                                                                                                                                                                                                                                                                                                                                                                                                                                                                                                                                                                                                                                                                                                                                                                                                                                                                                                                                                                                                                                                                                                                                                                                                                                                                                                                                                                                                                                                                                                                                                                                                                                                                                                                                                                                                                         |
| chr11 | 63414006  | 65838313  | M14,M2  | KCNK7, MAP3K11, PCNXL3, RASGRP2, SIPA1, RELA, PYGM, AT13, KAT5, RTN3, RN85E2C, AP5B1, OVOL1, CFL1, SF1, SNX32, MUS81, C11orf84, EFEMP2, MARK2, CTSW, FIBP, MAP4K2, CCDC85B, FOSL1, C11orf68, DRAP1, RCOR2, TSGA10P, SART1, NAA40, EIF1AD, COX8A, OTUB1, BANF1, MEN1, CST6, CATSPER1, GAL3ST3, SF3B2, MACROD1, FLRT1, C11orf95, PACS1, RN7SL596P, RNU6-1306P, RNU6-45P, STIP1, CDC42BPG, EHD1, FERMT3, ATG2A, TRPT1, MIR1237, MIR192, MIR194-2, RN7SL114P, HIGD1AP10, RNU2-23P, PGAM1P8, SLC22A20, NEAT1, MALAT1, SNRPGP19, SSSCA1-AS1, MIR4690, MIR4489, RN7SL309P, KRT8P26, OVOL1-AS1, NUDT22, PPP2R5B, DNAJC4, GPHA2, C11orf85, VEGFB, BATF2, FKBP2, ARL2, PPP1R14B, SNX15, PLCB3, SAC3D1, NAALADL1, BAD, GPR137, KCNK4, CDCA5, TEX40, ZFPL1, ESRRR, TMEM262, TRMT112, VPS51, PRDX5, CCDC88B, TM7SF2, ZNHIT2, FAU, RPS6KA4, SYVN1, SLC22A11, MRPL49, SPDYC, SLC22A12, CAPN1, NRXN2, POLA2, CDC42EP2, DPF2, TIGD3, SLC25A45, FRMD8, SCYL1, LTBP3, SSSCA1, FAM89B, EHPBP1L1                                                                                                                                                                                                                                                                                                                                                                                                                                                                                                                                                                                                                                                                                                                                                                                                                                                                                                                                                                                                                                                                                                                                                                                                                                                                                                                                                                                                                                                                                                                                                                                                                                                                                                                                                                                                                                                                                                                                                                                                                                                                                                                                                                                                                                                                        |
| chr11 | 65838313  | 66639157  | M14     | PACS1, KLC2, RAB1B, CNIH2, YIF1A, TMEM151A, CD248, RIN1, RNU1-84P, BRMS1, RNU4-39P, RN7SL12P, FTLP6, B3GNT1, SLC29A2, NPAS4, MRPL11, PELI3, DPP3, BBS1, ZDHH24, ACTN3, CTSF, CCDC87, CCS, RBM14, RBM4, RBM14-RBM4, RBM4B, SPTBN2, C11orf80, RCE1, PC, LRFN4                                                                                                                                                                                                                                                                                                                                                                                                                                                                                                                                                                                                                                                                                                                                                                                                                                                                                                                                                                                                                                                                                                                                                                                                                                                                                                                                                                                                                                                                                                                                                                                                                                                                                                                                                                                                                                                                                                                                                                                                                                                                                                                                                                                                                                                                                                                                                                                                                                                                                                                                                                                                                                                                                                                                                                                                                                                                                                                                                                                        |
| chr11 | 66639157  | 67088804  | M14,M2  | RNU7-23P, MIR3163, PC, C11orf86, SYT12, RHOD, KDM2A, ADRBK1, ANKRD13D, SSH3                                                                                                                                                                                                                                                                                                                                                                                                                                                                                                                                                                                                                                                                                                                                                                                                                                                                                                                                                                                                                                                                                                                                                                                                                                                                                                                                                                                                                                                                                                                                                                                                                                                                                                                                                                                                                                                                                                                                                                                                                                                                                                                                                                                                                                                                                                                                                                                                                                                                                                                                                                                                                                                                                                                                                                                                                                                                                                                                                                                                                                                                                                                                                                        |
| chr11 | 67088804  | 70170558  | M14     | RN7SKP239, RNU6-1238P, RN7SL59P, DOC2G, RPL37P2, UNC93B5, OR7E11P, ALG1L8P, FAM86C2P, RNU6-46P, RPS3AP40, OR7E1P, ALDH3B1, MIR4691, NDUFA3P2, MIR3164, IFITM9P, ANO1-AS2, RNU6-1175P, ANO1-AS1, H2AFZP4, MIR548K, POLD4, CLCF1, RAD9A, PPP1CA, TBC1D10C, CARNIS1, RPS6KB2, PTPRCAP, CORO1B, GPR152, CABP4, TMEM134, AIP, PITPNM1, CDK2AP2, CABP2, GSTP1, C11orf72, NDUFV1, NUDT8, TBX10, ACY3, ALDH3B2, UNC93B1, NDUFS8, TCIRG1, CHKA, SUV420H1, C11orf24, LRP5, PPP6B, GAL, MTL5, CPT1A, MRPL21, IGHMBP2, MRGPRD, MRGPRF, TPCN2, MYEOV, CCND1, ORAOV1, FGF19, FGF4, FGF3, ANO1, FADD, PPIFA1                                                                                                                                                                                                                                                                                                                                                                                                                                                                                                                                                                                                                                                                                                                                                                                                                                                                                                                                                                                                                                                                                                                                                                                                                                                                                                                                                                                                                                                                                                                                                                                                                                                                                                                                                                                                                                                                                                                                                                                                                                                                                                                                                                                                                                                                                                                                                                                                                                                                                                                                                                                                                                                      |
| chr11 | 73366847  | 73753263  | M16     | RN7SKP243, CCDC58P5, PLEKHB1, RAB6A, MRPL48, COA4, PAAF1, DNAJB13, UCP2, UCP3, C2CD3                                                                                                                                                                                                                                                                                                                                                                                                                                                                                                                                                                                                                                                                                                                                                                                                                                                                                                                                                                                                                                                                                                                                                                                                                                                                                                                                                                                                                                                                                                                                                                                                                                                                                                                                                                                                                                                                                                                                                                                                                                                                                                                                                                                                                                                                                                                                                                                                                                                                                                                                                                                                                                                                                                                                                                                                                                                                                                                                                                                                                                                                                                                                                               |
| chr11 | 105623706 | 107219662 | M11     | GRIA4, MSANTD4, KBTBD3, AASDHPPT, GUCY1A2, CWF19L2, RNU4-55P, RNU6-277P                                                                                                                                                                                                                                                                                                                                                                                                                                                                                                                                                                                                                                                                                                                                                                                                                                                                                                                                                                                                                                                                                                                                                                                                                                                                                                                                                                                                                                                                                                                                                                                                                                                                                                                                                                                                                                                                                                                                                                                                                                                                                                                                                                                                                                                                                                                                                                                                                                                                                                                                                                                                                                                                                                                                                                                                                                                                                                                                                                                                                                                                                                                                                                            |
| chr11 | 107219662 | 134257834 | M11,M2  | RNU6-321P, STT3A-AS1, RNU6-1156P, RNU2-35P, NAP1L1P1, RNU4-86P, RN7SL351P, RPL35AP26, KIRREL3-AS1, KIRREL3-AS2, MIR3167, KIRREL3-AS3, RN7SKP121, RN7SKP279, SENCN, RNU6-876P, RNU6-874P, ZNF123P, RPS27P20, LINC00167, TCEB2P2, RPL34P21, DDX18P5, BAK1P2, PPP1R10P1, RN7SL167P, RNU6ATAC12P, NTM-IT, RNU6-1182P, OPCML-IT2, OPCML-IT1, MIR4697, PTP4A2P2, CWF19L2, ALKBH8, ELMOD1, SLN, SLC35F2, RAB39A, CUL5, ACAT1, NPAT, SMARCE1P1, ATM, RPS2P39, CYCSP29, RNU6-654P, RNA5SP349, TFAMP2, HNRNP1P60, RNA5SP350, RPS17P15, MIR4491, RNU2-60P, MIR348, MIR34C, RN7SKP273, ALG9-IT1, GNG5P3, RPL37AP8, RNA5SP351, PPIHP1, RNU6-893P, MRPS36P4, RPS12P21, RPS6P16, ST13P10, RNU6-44P, RPL23AP62, RNU7-187P, NCAM1-AS1, MIR4301, ATF4P4, LRRC37A13P, RNU6-1107P, NXPE2P1, LINC00900, C11orf65, APOA1-AS, SIK3-IT1, RNY4P6, TMPRSS4-AS1, HSP1E1P18, RN7SL86P, RPL5P30, RNU6-1157P, RNU6-376P, SETP16, MIR4492, RN7SL888P, RN7SL529P, RPL23AP64, MIR3656, KDELC2, SLC37A4, EXPH5, DDX10, C11orf87, ZC3H12C, RDX, FDX1, ARHGAP20, VPS11, RNU6-262P, USP2-AS1, DUXAP5, KRT8P7, RNU6-1123P, TCEB1P22, HMGB1P42, RPS4XP12, BMPR1APS2, RNU6-256P, MIR125B1, MIRLET7A2, MIR100, RNU4ATAC10P, RNU4ATAC5P, RNU6-592P, GLULP3, RNU4-23P, ATP5F1P5, RPL34P23, RPS26P43, RPL31P47, SNORD14E, SNORD14D, SNORD14C, MIR4493, LINC01059, SF3A3P2, RNU1-21P, OR6M2P, OR6M3P, OR10G5P, C11orf53, COLCA1, COLCA2, POU2AF1, OR10D5P, OR10D4P, OR10N1P, OR10D1P, OR8F1P, OR8G3P, OR8G7P, SLC54A1P1, OR8B7P, OR8B6P, OR8B5P, OR8B1P, OR8C1P, BTG4, OR8X1P, OR8A2P, OR8B9P, OR8B10P, OR8A3P, OR8Q1P, RNA5SP352, KRT18P59, C11orf88, LAYN, SIK2, PPP2R1B, ALG9, FDXACB1, C11orf1, CRYAB, HSPB2-C11orf52, C11orf52, DIXD1, DLAT, PIH1D2, C11orf57, TIMM8B, SDHD, IL18, TEX12, BCO2, PTS, PLET1, NCAM1, TTC12, ANKK1, DRD2, TMPRSS5, ZW10, CLDN25, USP28, HTR3B, HTR3A, ZBTB16, NNMT, C11orf71, RBM7, REXO2, NXPE4, NXPE4, CADM1, BUD13, ZNF259, APOA5, APOA4, APOC3, APOA1, SIK3, PAFAH1B2, SIDT2, TAGLN, PCSK7, RNF214, BACE1, CEP164, DSCAML1, FXYD2, FXYD6-FXYD2, FXYD6, TMPRSS13, IL10RA, TMPRSS4, SCN4B, SCN2B, AMICA1, MPZL3, MPZL2, CD3E, CD3D, CD3G, UBE4A, ATP5L, KMT2A, TTC36, TMEM25, IFT46, ARCN1, PHLD1P1, TREH, DDX6, CXCR5, BCL9L, UPK2, FOXR1, CCDC84, RPS25, TRAPP4, HYOU1, HMBS, H2AFX, DPAGT1, C2CD2L, HINFP, ABCG4, NLRX1, PDZD3, CCDC153, CBL, MCAM, RNF26, C10TNF5, MFRP, USP2, THY1, PVRL1, TRIM29, OAF, POU2F3, TMEM136, ARHGFE12, GRIK4, TBCEL, TECTA, CSC5D, SORL1, BLID, UBASH3B, CRTAM, C11orf63, BSX, HSPA8, CLMP, GRAMD1B, SCN3B, ZNF202, OR6X1, OR6M1, TMEM225, OR8D4, OR4D5, OR6T1, OR10S1, OR10G6, OR10G4, OR10G9, OR10G8, OR10G7, VWA5A, OR10D3, OR8G1, OR8G5, OR8D1, OR8D2, OR8B2, OR8B3, OR8B4, OR8B8, OR8E12, OR8A1, PANX3, TBRG1, SIAE, SPA17, NRGN, VSI62, ESAM, MSANTD2, ROBO3, ROBO4, HEPACAM, HEPN1, CCDC15, SLC37A2, TMEM218, PKNOX2, FEZ1, EI24, STT3A, CHEK1, ACVR1, PATE1, PATE2, PATE3, PATE4, HYL51, PUS3, DDX25, CDON, RPU5D4, FAM118B, SRPR, FOXRED1, TIRAP, DCPS, ST3GAL4, KIRREL3, ETS1, FLI1, KCNJ1, KCNJ5, C11orf45, TP53AIP1, ARHGAP32, BARX2, TMEM45B, NFRKB, PRDM10, APLP2, ST14, ZBTB44, ADAMTS8, ADAMTS15, C11orf44, SNX19, NTM, OPCML, SPATA19, IGSF9B, FAM3, NCAPD3, VPS26B, THYN1, ACAD8, GLB1L3, GLB1L2, B3GAT1 |
| chr12 | 7656240   | 8281958   | M2      | CD163, APOBEC1, GDF3, DPPA3, CLEC4C, NANOGB, NANO, SLC2A14, SLC2A3, FOXJ2, C3AR1, NECAP1, CLEC4A, GAPDHP31, NIFKP3, NANOGP1                                                                                                                                                                                                                                                                                                                                                                                                                                                                                                                                                                                                                                                                                                                                                                                                                                                                                                                                                                                                                                                                                                                                                                                                                                                                                                                                                                                                                                                                                                                                                                                                                                                                                                                                                                                                                                                                                                                                                                                                                                                                                                                                                                                                                                                                                                                                                                                                                                                                                                                                                                                                                                                                                                                                                                                                                                                                                                                                                                                                                                                                                                                        |
| chr12 | 19282984  | 19675173  | M17     | RN7SL459P, RN7SL67P, RNU6-254P, EEF1A1P4, PLEKHA5, AEBP2                                                                                                                                                                                                                                                                                                                                                                                                                                                                                                                                                                                                                                                                                                                                                                                                                                                                                                                                                                                                                                                                                                                                                                                                                                                                                                                                                                                                                                                                                                                                                                                                                                                                                                                                                                                                                                                                                                                                                                                                                                                                                                                                                                                                                                                                                                                                                                                                                                                                                                                                                                                                                                                                                                                                                                                                                                                                                                                                                                                                                                                                                                                                                                                           |
| chr12 | 110230456 | 112308164 | M2      | BRAP, ACAD10, ANKRD13A, C12orf76, IFT81, ALDH2, ATP2A2, MAPKAPK5, ANAPC7, ARPC3, GPN3, FAM216A, VPS29, MIR4497, RN7SL441P, RN7SL769P, HMGA1P3, RPL31P49, RN7SL387P, RPL29P25, RAD9B, RNA5SP373, HSPA8P14, PCNPP1, MAPKAPK5-AS1, PPTC7, TCTN1, HVCN1, PPP1CC, CCDC63, MYL2, CUX2, FAM109A, SH2B3, ATXN2, TRPV4, GLTP, TCHP, GIT2                                                                                                                                                                                                                                                                                                                                                                                                                                                                                                                                                                                                                                                                                                                                                                                                                                                                                                                                                                                                                                                                                                                                                                                                                                                                                                                                                                                                                                                                                                                                                                                                                                                                                                                                                                                                                                                                                                                                                                                                                                                                                                                                                                                                                                                                                                                                                                                                                                                                                                                                                                                                                                                                                                                                                                                                                                                                                                                    |
| chr12 | 120597945 | 120615303 | M16     | GCN1L1                                                                                                                                                                                                                                                                                                                                                                                                                                                                                                                                                                                                                                                                                                                                                                                                                                                                                                                                                                                                                                                                                                                                                                                                                                                                                                                                                                                                                                                                                                                                                                                                                                                                                                                                                                                                                                                                                                                                                                                                                                                                                                                                                                                                                                                                                                                                                                                                                                                                                                                                                                                                                                                                                                                                                                                                                                                                                                                                                                                                                                                                                                                                                                                                                                             |
| chr12 | 120615303 | 124267811 | M14,M16 | PXN-AS1, HNF1A, RPS20P31, NME2P1, RNU4-2, RNU4-1, RNU6-1088P, RPS27P25, RPL31P52, DYNLL1-AS1, RPL29P24, RPL11P5, MIR4700, ARF1P2, CLIC1P1, RPL12P33, HNF1A-AS1, C12orf43, OASL, RNU6-1004P, RNU7-170P, P2RX7, RPL21P1, MIR4304, RN7SL133P, RNA5SP375, MIR3908, RPL27P12, P2RX4, CAMKK2, ANAPC5, RNF34, KDM2B, GCN1L1, RPLP0, ORAI1, MORN3, TMEM120B, RHOF, SETD1B, HPD, PSMID9, WDR66, BCL7A, MLXIP, LRRC43, IL31, B3GNT4, DIABLO, VPS33A, CLIP1, PXN, ZCCHC8, SIRT4, PLA2G1B, RSR2, MSI1, COX6A1, TRIAP1, GATC, SRSF9, DYNLL1, COQ5, RNF10, KNTC1, HCAR1, HCAR2, HCAR3, DENR, POP5, CCDC62, CABP1, HIP1R, MLEC, UNC119B, ACADS, SPPL3, VPS37B, ABCB9, OGFOD2, ARL6IP4, PITPNM2, MPHOSPH9, C12orf65, CDK2AP1, SBNO1, SETD8, RILPL2, SNRNP35, RILPL1, TMED2, DDX55, EIF2B1, GTF2H3, TCTN2, ATP6V0A2, DNAH10                                                                                                                                                                                                                                                                                                                                                                                                                                                                                                                                                                                                                                                                                                                                                                                                                                                                                                                                                                                                                                                                                                                                                                                                                                                                                                                                                                                                                                                                                                                                                                                                                                                                                                                                                                                                                                                                                                                                                                                                                                                                                                                                                                                                                                                                                                                                                                                                                                         |
| chr12 | 124267811 | 126004077 | M14     | BRI3BP, AAC5, TMEM132B, RNU6-927P, MIR5188, RPL22P19, DNAH10, CCDC92, DNAH10OS, ZNF664, FAM101A, NCOR2, SCARB1, UBC, DHX37                                                                                                                                                                                                                                                                                                                                                                                                                                                                                                                                                                                                                                                                                                                                                                                                                                                                                                                                                                                                                                                                                                                                                                                                                                                                                                                                                                                                                                                                                                                                                                                                                                                                                                                                                                                                                                                                                                                                                                                                                                                                                                                                                                                                                                                                                                                                                                                                                                                                                                                                                                                                                                                                                                                                                                                                                                                                                                                                                                                                                                                                                                                         |
| chr12 | 133219405 | 133252679 | M2      | POLE                                                                                                                                                                                                                                                                                                                                                                                                                                                                                                                                                                                                                                                                                                                                                                                                                                                                                                                                                                                                                                                                                                                                                                                                                                                                                                                                                                                                                                                                                                                                                                                                                                                                                                                                                                                                                                                                                                                                                                                                                                                                                                                                                                                                                                                                                                                                                                                                                                                                                                                                                                                                                                                                                                                                                                                                                                                                                                                                                                                                                                                                                                                                                                                                                                               |
| chr12 | 133252679 | 133783695 | M16,M2  | RNA5SP379, RPS11P5, RNU6-327P, NANOGBNP2, RNU4ATAC12P, PTP4A1P2, RPL23AP67, POLE, PXM2P, PGAM5, ANKLE2, GOLGA3, CHFR, ZNF605, ZNF26, ZNF84, ZNF140, ZNF891, ZNF10, ZNF268                                                                                                                                                                                                                                                                                                                                                                                                                                                                                                                                                                                                                                                                                                                                                                                                                                                                                                                                                                                                                                                                                                                                                                                                                                                                                                                                                                                                                                                                                                                                                                                                                                                                                                                                                                                                                                                                                                                                                                                                                                                                                                                                                                                                                                                                                                                                                                                                                                                                                                                                                                                                                                                                                                                                                                                                                                                                                                                                                                                                                                                                          |
| chr14 | 50044052  | 50808940  | M2      | RNU6ATAC30P, RN7SL3, RN7SL2, RNU6-189P, PDLIM1P1, RN7SKP193, MIR4504, RPL32P29, RN7SL1, RHOOQP1, RPS29, LRR1, RPL36AL, MGAT2, DNAAF2, POLE2, KLHDC1, KLHDC2, NEMF, ARF6, C14orf182, C14orf183, VCPKMT, SOS2, L2HGDI, ATP5S, CDKL1                                                                                                                                                                                                                                                                                                                                                                                                                                                                                                                                                                                                                                                                                                                                                                                                                                                                                                                                                                                                                                                                                                                                                                                                                                                                                                                                                                                                                                                                                                                                                                                                                                                                                                                                                                                                                                                                                                                                                                                                                                                                                                                                                                                                                                                                                                                                                                                                                                                                                                                                                                                                                                                                                                                                                                                                                                                                                                                                                                                                                  |
| chr14 | 54996855  | 59113505  | M14     | RNU6ATAC9P, MIR4308, FDPSP3, CHMP4BP1, RPL21P6, KTN1-AS1, RPL7AP4, RPL13AP3, LINC00520, OTX2-AS1, RN7SL461P, RNU6-1204P, RPL3P3, RN7SKP99, UBA5P2P3, RN7SL598P, HMGB1P14, RNU6-341P, HSBP1P1, HNRNPCP1, RPL9P5, CGRRF1, SAMDA4, GCH1, WDHD1, SOCS4, MAPK11P1L, LGALS3, DLGAP5, FBXO34, ATG14, TBPL2, KTN1, PELI2, TMEM260, OTX2, EXOC5, AP5M1, NAA30, C14orf105, SLC35F4, C14orf37, ACTR10, PSMA3, ARID4A, TOMM20L, TIMM9, KIAA0586, DACT1                                                                                                                                                                                                                                                                                                                                                                                                                                                                                                                                                                                                                                                                                                                                                                                                                                                                                                                                                                                                                                                                                                                                                                                                                                                                                                                                                                                                                                                                                                                                                                                                                                                                                                                                                                                                                                                                                                                                                                                                                                                                                                                                                                                                                                                                                                                                                                                                                                                                                                                                                                                                                                                                                                                                                                                                         |



|       |          |          |              |                                                                                                                                                                                                                                                                                                                                                                                                                                                                                                                                                                                                                                                                                                                                                                                                                                                                                                                                                                                                                                                                                                                                                                                                                                                                                                      |
|-------|----------|----------|--------------|------------------------------------------------------------------------------------------------------------------------------------------------------------------------------------------------------------------------------------------------------------------------------------------------------------------------------------------------------------------------------------------------------------------------------------------------------------------------------------------------------------------------------------------------------------------------------------------------------------------------------------------------------------------------------------------------------------------------------------------------------------------------------------------------------------------------------------------------------------------------------------------------------------------------------------------------------------------------------------------------------------------------------------------------------------------------------------------------------------------------------------------------------------------------------------------------------------------------------------------------------------------------------------------------------|
| chr16 | 97278    | 2327974  | M14          | POLR3K, SNRN25, RHBD1F1, MIR3177, RN7SL367P, SNORA10, SNORA64, SNHG9, RN7SL219P, MIR1225, MIR4516, MIR3180-5, SNORD60, MPG, NPRL3, MIR940, MIR3677, MIR4717, HBZ, HBM, HBA2, HBA1, HBQ1, LUC7L, ITFG3, RGS11, ARHGDDIG, PDIA2, AXIN1, MRPL28, TMEEM8A, NME4, DECR2, RAB11FIP3, CAPN15, C16orf11, PIGQ, NHLRC4, RAB40C, WFIKKN1, C16orf13, FAM195A, WDR90, RHOT2, RHBOL1, STUB1, JMJDB, WDR24, FBXL16, METRN, FAM173A, CCDC78, HAGHL, NARFL, MSLN, MSLNL, RPUSD1, CHTF18, GNG13, PRR25, LMF1, SOX8, SSTR5, C1QTNF8, CACNA1H, TPSS1, TPSS2, TPSSA1, TPSSD1, UBE2I, BAIAP3, TSR3, GNPTG, UNKL, C16orf91, CCDC154, CLCN7, PTX4, TEO2, IFT140, TMEEM204, CRAMP1L, HN1L, MAPK8IP3, NME3, MRPS34, EME2, SPSB3, NUBP2, IGFALS, HAGH, FAHD1, MEIOB, HS3ST6, MSRB1, RPL3L, NDUFB10, RPS2, RNF151, TBL3, NOXO1, GFER, SYNGR3, ZNF598, NPW, SLC9A3R2, NTHL1, TSC2, PKD1, RAB26, TRAF7, CASKIN1, MLST8, BRICD5, PGP, EF41, DNASE1L2, EC1I, RNP51, ABCA3, HBZP1, MIR5587, MIR3176, MIR862, SSTR5-AS1, PRSS29P, TPSP2, RPS20P2, RPS3AP2                                                                                                                                                                                                                                                                             |
| chr16 | 46503248 | 56901054 | M11          | ANKRD26P1, RNU6-845P, RAB43P1, CKBP1, RPL23AP7, RNA5SP424, RNA5SP425, EIF4BP5, NDUFA5P11, UBA52P8, RN7SL54P, MOC51P1, RPS2P44, KLF8P1, RNU6-257P, ADAM3B, MRPS21P7, MRPS21P8, RPL34P29, RNY4P3, RPL10P14, RNA5SP426, SOD1P2, UNGP1, HNRNPA1P48, RN7SKP142, LINC00919, CASC16, RNA5SP427, RNU6-1153P, FTO-IT1, CRNDE, RN7SL841P, RPL31P56, CES1P2, CES1P1, MIR3935, MT1L, MT1JP, MT1DP, MT1CP, DPPA2P4, MIR138-2, SHCBP1, VPS35, ORC6, MYLK3, C16orf87, GPT2, DNAJA2, NETO2, ITFG1, PHKB, ABCC12, ABCC11, LONP2, SIAH1, N4BP1, CBLN1, C16orf78, ZNF423, CNEP1R1, HEATR3, PAPP5, ADCY7, BRD7, NKD1, SNX20, NOD2, CYLD, SALL1, C16orf97, TOX3, CHD9, RBL2, AKTIP, RPRGRIP1L, FTO, IRX3, IRX5, IRX6, MMP2, LPCAT2, CAPNS2, SLC6A2, CES1, CESSA, GNAO1, AMFR, NUDT21, OGFOD1, BBS2, MT4, MT3, MT2A, MT1E, MT1M, MT1A, MT1B, MT1F, MT1G, MT1H, MT1X, NUP93, SLC12A3                                                                                                                                                                                                                                                                                                                                                                                                                                        |
| chr16 | 56901054 | 59788570 | M11,M14      | RPS24P17, HMGB3P32, RNU6-20P, RN7SL645P, RNU6-269P, RNU6-1110P, RNU6-103P, SNORA46, SNORA50, RNU6-1155P, RN7SL143P, GEMIN8P2, RPS27P27, RNU4-58P, APOOP5, SLC12A3, HERPUD1, CETP, NLR5, CPNE2, FAM192A, RSPRY1, ARL2BP, PLLP, CCL22, CX3CL1, CCL17, CIAPIN1, COO9, POLR2C, DOK4, CCDC102A, GPR114, GPR56, GPR97, CCDC135, KATNB1, KIFC3, CNGB1, TEPP, ZNF319, USB1, MMP15, C16orf80, CSNK2A2, CCDC113, PRSS54, GINS3, NDRG4, SETD6, CNOT1, SLC38A7, GOT2                                                                                                                                                                                                                                                                                                                                                                                                                                                                                                                                                                                                                                                                                                                                                                                                                                             |
| chr16 | 59788570 | 66515616 | M11          | APOOP5, GNPATP, RN7SKP76, RNU6-21P, UBE2FP2, RPS15AP34, LINC00922, RNA5SP428, LINC00920, CDH8, CDH11, CDH5, BEAN1                                                                                                                                                                                                                                                                                                                                                                                                                                                                                                                                                                                                                                                                                                                                                                                                                                                                                                                                                                                                                                                                                                                                                                                    |
| chr16 | 66515616 | 66670484 | M11,M14      | BEAN1, TK2, KCLF, KCLF-CMTM1, CMTM1, CMTM2, CMTM3, CMTM4                                                                                                                                                                                                                                                                                                                                                                                                                                                                                                                                                                                                                                                                                                                                                                                                                                                                                                                                                                                                                                                                                                                                                                                                                                             |
| chr16 | 66670484 | 68155889 | M14          | ACD, PARD6A, ENK1, C16orf86, GFOD2, RANBP10, TSNAIXIP1, CENPT, THAP11, NUTF2, EDC4, NRN1L, PSKH1, CTRL, PSMB10, LCAT, SLC12A4, DPEP3, DPEP2, DUS2, DDX28, NFATC3, RN7SL543P, MIR328, RN7SKP118, RNU1-123P, KARSP3, RNU6-359P, CMTM4, DYNCL1L2, CCDC79, NAE1, CA7, PDP2, CDH16, RRAD, FAM96B, CES2, CES3, CES4A, CBFB, C16orf70, B3GNT9, TRADD, FBXL8, HSF4, NOL3, KIAA0895L, EXOC3L1, EZF4, ELMO3, LRRC29, TMEEM208, FHOD1, SLC9A5, PLEKHG4, KCTD19, LRRC36, TPPP3, ZDHHC1, HSD11B2, ATP6V0D1, AGRP, FAM65A, CTCF, RLTPR                                                                                                                                                                                                                                                                                                                                                                                                                                                                                                                                                                                                                                                                                                                                                                             |
| chr16 | 68155889 | 70765463 | M14,M9       | HSPE1P5, RNA5SP429, FTLP14, RNU6-898P, RPS2P45, RNU6-22P, MIR1538, MIR140, PDXDC2P, MIR1972-2, RN7SL407P, RN7SL279P, RPS27P26, RNU6-23P, SNORD111B, SNORD111, NFATC3, ESRP2, PLA2G15, SLC7A6, SLC7A6OS, PRMT7, SMPD3, ZFP90, CDH3, CDH1, RPS12P27, RNU6-1262P, RNU4-30P, RPL35AP33, TANGO6, HAS3, RNU4-36P, CHTF8, CIRH1A, SNTB2, VPS4A, COG8, PDF, NIP7, TMED6, TERF2, CYB5B, NFAT5, NQO1, NOB1, WWP2, CLEC18A, PDPR, CLEC18C, EXOSC6, AARS, DDX19B, DDX19A, ST3GAL2, FUK, COG4, SF3B3, IL34, MTSS1L, VAC14                                                                                                                                                                                                                                                                                                                                                                                                                                                                                                                                                                                                                                                                                                                                                                                         |
| chr16 | 70765463 | 70883628 | M9           | VAC14-AS1, VAC14, HYDIN                                                                                                                                                                                                                                                                                                                                                                                                                                                                                                                                                                                                                                                                                                                                                                                                                                                                                                                                                                                                                                                                                                                                                                                                                                                                              |
| chr16 | 70883628 | 71196633 | M4,M9        | RNU6ATAC25P, HYDIN                                                                                                                                                                                                                                                                                                                                                                                                                                                                                                                                                                                                                                                                                                                                                                                                                                                                                                                                                                                                                                                                                                                                                                                                                                                                                   |
| chr16 | 71196633 | 73127362 | M9           | RNU6-1061P, RNU6-208P, SNORA70D, SNORD71, PKD1L3, RPL39P31, ATP5A1P3, RNU6-385P, RNU7-90P, KRT18P18, RNU7-71P, HCCAT5, HYDIN, CMTR2, CALB2, ZNF23, ZNF19, CHST4, TAT, MARVELD3, PHLPP2, AP1G1, ATXN1L, IST1, ZNF821, DHODH, TXNL4B, HP, HPR, DHX38, PMFBP1, ZFH3                                                                                                                                                                                                                                                                                                                                                                                                                                                                                                                                                                                                                                                                                                                                                                                                                                                                                                                                                                                                                                     |
| chr16 | 73127362 | 88719761 | M11,M9       | HCCAT5, RPSAP56, RNU6-237P, HSPE1P7, RNU6-758P, RN7SL520P, ATP5F1P7, RNA5SP430, RPL18P13, RN7SKP233, MIR4719, VN2R10P, KRT8P22, LSM3P5, RPS3P7, RNA5SP431, RNU6-1191P, MIR4720, RN7SKP190, RN7SL134P, MIR3182, RNA5SP432, RNA5SP433, COX6CP16, LINC00311, MIR5093, RN7SL381P, MIR1910, RNU1-103P, LINC01082, LINC01081, LINC00917, FENRRR, MIR5189, C16orf47, PSMD7, NPPIP15, CLEC18B, GLG1, RFWD3, MLKL, FA2H, WDR59, ZNRF1, LDHD, ZFP1, CTRB2, CTRB1, BCAR1, CFDP1, TMEEM170A, CHST5, CHST5, TMEEM231, GABARAPL2, ADAT1, KARS, TERF2IP, CNTNAP4, MON1B, SYCE1L, ADAMTS18, NUDT7, VAT1L, CLEC3A, WWOX, MAF, DYNLRB2, CDYL2, CMC2, CENPN, ATMIN, C16orf46, GCSH, PKD1L2, BCMO1, GAN, CMIP, PLCG2, SDR42E1, HSD17B2, MPHOSPH6, CDH13, HSBP1, MLYCD, OSGIN1, NECAB2, SLC38A8, MBTPS1, HSDL1, DNAAF1, TAF1C, ADAD2, LRRC4, WFDC1, ATP2C2, TLDC1, KHLH36, USP10, CRISPLD2, ZDHHC7, KIAA0513, FAM92B, GSE1, GINS2, C16orf74, EMC8, COX4I1, IRF8, FOXF1, MTHFS, FOXO2, FOXL1, C16orf95, FBXO31, MAP1LC3B, ZCCHC14, JPH3, KLHDC4, SLC7A5, CASA, BANP, ZNF469, ZFPM1, ZC3H18, IL17C, CYBA, MVD                                                                                                                                                                                                               |
| chr16 | 88719761 | 90142293 | M11,M14,M9   | SNAI3-AS1, MIR4722, LINC00304, RNU6-430P, RNU7-117P, SNORD68, VPS9D1-AS1, AFG3L1P, URAHP, MVD, SNAI3, RNF166, CTU2, PIEZO1, CDT1, APRT, GALNS, TRAPPC2L, PABPN1L, CBFA2T3, ACSF3, CDH15, SLC22A31, ZNF778, ANKRD11, SPG7, RPL13, CPNE7, DPEP1, CHMP1A, SPATA33, CDK10, SPATA2L, VPS9D1, ZNF276, FANCA, SPIRE2, TCF25, MC1R, TUBB3, DEF8, CENPBD1, DBNDD1, GAS8, C16orf3, PRDM7                                                                                                                                                                                                                                                                                                                                                                                                                                                                                                                                                                                                                                                                                                                                                                                                                                                                                                                       |
| chr16 | 90142293 | 90142338 | M11,M9       | PRDM7                                                                                                                                                                                                                                                                                                                                                                                                                                                                                                                                                                                                                                                                                                                                                                                                                                                                                                                                                                                                                                                                                                                                                                                                                                                                                                |
| chr17 | 6010     | 6089     | M16          | DOC2B                                                                                                                                                                                                                                                                                                                                                                                                                                                                                                                                                                                                                                                                                                                                                                                                                                                                                                                                                                                                                                                                                                                                                                                                                                                                                                |
| chr17 | 6089     | 1802848  | M14,M16      | DOC2B, RPH3AL, C17orf97, FAM101B, VPS53, FAM57A, GEMIN4, GLOD4, RNMTL1, NXN, TIMM22, ABR, BHLHA9, TUSC5, YWHAE, CRK, MYO1C, INPP5K, RPS4XP17, DBIL5P, MIR3183, PITPNA-AS1, RN7SL105P, MIR22HG, PITPNA, SLC43A2, SCARF1, RILP, PRPF8, TLCD2, WDR81, SERPINF2, SERPINF1, SMDY4, RPA1                                                                                                                                                                                                                                                                                                                                                                                                                                                                                                                                                                                                                                                                                                                                                                                                                                                                                                                                                                                                                   |
| chr17 | 1802848  | 7163960  | M14          | CAMKK1, P2RX1, ATP2A3, ZZZF1, CYB5D2, ANKFY1, UBE2G1, SPNS3, SPNS2, MYBBP1A, GGT6, SMTNL2, ALOX15, PELP1, ARRB2, MED11, CXCL16, ZMYND15, TM4SF5, VMO1, GLTPD2, PSMB6, PLD2, MINK1, CHRNE, C17orf107, GP1BA, SLC25A11, RNF167, PFN1, ENO3, SPAG7, CAMTA2, INCA1, KIF1C, SLC52A1, ZFP3, ZNF232, USP6, ZNF594, SCIMP, RABEP1, NUP88, RPAIN, C1QB8, DHX33, DERL2, MIS12, NLRP1, WSCD1, AIPL1, FAM64A, PITPNM3, KIAA0753, TXNDC17, MED31, C17orf100, SLC13A5, XAF1, FBXO39, TEKT1, ALOX12, RNASEK, RNASEK-C17orf49, C17orf49, BCL6B, SLC16A13, SLC16A11, CLEC10A, ASGR2, ASGR1, DLG4, ACADVL, DVL2, MIR132, MIR212, RN7SL624P, HNRNPA1P16, SNORD91B, SNORD91A, RN7SL33P, EIF4A1P9, SAMD11P1, RN7SL608P, PHF23, MIR1253, RN7SL605P, OR1E3, OR1P1, OR1D4, OR1D3P, GABARAP, OR3A4P, OR3A5P, OR1AC1P, OR1R1P, CTDNBP1, RNA5SP434, RYK1, RN7SL774P, TXNP4, RNU6-955P, ATP6V0CP1, RN7SL171P, RN7SL784P, ELP5, RNU7-31P, RNU6-1264P, BTF3P14, RNA5SP435, CLDN7, MIR4520B, MIR4520A, RPL23AP73, ALOX12P2, MIR497HG, RPL7AP6A, MIR324, RPA1, RTN4R1L, DPH1, OVCA2, HIC1, SMG6, SRR, TSR1, SGSM2, MNT, METTL16, PAFAH1B1, CLUH, RAP1GAP2, OR1D5, OR1D2, OR1G1, OR1A2, OR1A1, OR3A2, OR3A1, OR1E1, OR3A3, OR1E2, SPATA22, ASPA, TRPV3, TRPV1, SHPK, CTNS, TAX1BP3, P2RX5-TAX1BP3, EMC6, P2RX5, ITGAE, GSG2, C17orf85 |
| chr17 | 7163960  | 7722726  | M14,M16      | CLDN7, SLC2A4, SENP3-EIF4A1, SNORA67, SNORA48, SNORD10, RPL29P2, YBX2, EIF5A, GPS2, NEURL4, ACAP1, KCTD11, TMEEM95, TNK1, TMEEM256-PLSCR3, TMEEM256, NLGN2, SPEM1, C17orf74, TMEEM102, FGF11, CHRNB1, ZBTB4, SLC35G6, POLR2A, TNFSF12, TNFSF12-TNFSF13, TNFSF13, SENP3, EIF4A1, CD68, MPDU1, SOX15, FXR2, SHBG, SAT2, ATP1B2, TP53, WRAP53, EFN3B, DNAH2                                                                                                                                                                                                                                                                                                                                                                                                                                                                                                                                                                                                                                                                                                                                                                                                                                                                                                                                             |
| chr17 | 7722726  | 8286519  | M14          | CHD3, KCNAB3, TRAPPC1, CNTR0B, GUCY2D, ALOX15B, ALOX12B, ALOXE3, HES7, PER1, VAMP2, TMEEM107, C17orf59, AURKB, CTC1, PFAS, SLC25A35, RANGRF, ARHGEF15, ODF4, KRBA2, RPL26, SCARNA21, MIR4314, SNORD118, LINC00324, DNAH2, KDM6B, TMEEM88, LSMD1, CYB5D1                                                                                                                                                                                                                                                                                                                                                                                                                                                                                                                                                                                                                                                                                                                                                                                                                                                                                                                                                                                                                                              |
| chr17 | 29701030 | 30274704 | M16          | RN7SL79P, RN7SL45P, MIR4724, MIR193A, RNU6ATAC7P, MIR4725, MIR365B, RNU6-1134P, NF1, RAB11FIP4, COPRS, UTP6, SUZ12                                                                                                                                                                                                                                                                                                                                                                                                                                                                                                                                                                                                                                                                                                                                                                                                                                                                                                                                                                                                                                                                                                                                                                                   |
| chr17 | 41154888 | 43345375 | M9           | SPATA32, RPL21P4, NBR2, LINC00854, LINC00910, RNU6-1137P, RNU6-470P, MIR2117, RNU6-406P, RNU6-971P, RNU6-131P, ASB16-AS1, SHC1P2, RN7SL507P, RNU6-453P, RPL7L1P5, RN7SL258P, RN7SL819P, RN7SL405P, MAP3K14-AS1, MAP3K14, RPL27, IFI35, VAT1, RND2, BRCA1, NBR1, TMEEM106A, ARL4D, DHX8, ETV4, MEOX1, SOST, DUSP3, C17orf105, MPP3, CD300L6, MPP2, FAM215A, PPY, PYY, NAGS, TMEEM101, LSM12, G6PC3, HDAC5, C17orf53, ASB16, TMUB2, ATXN7L3, UBTF, SLC4A1, RUND3C3A, SLC25A39, GRN, FAM171A2, ITGA2B, GPATCH8, FZD2, C17orf104, CCDC43, DBF4B, ADAM11, GJC1, HIGD1B, EFTUD2, CCDC103, FAM187A, GFAP, KIF18B, C1QL1, DCAKD, NMT1, PLCD3, ACBD4, HEXIM1, HEXIM2, FMNL1                                                                                                                                                                                                                                                                                                                                                                                                                                                                                                                                                                                                                                   |
| chr17 | 43345375 | 43367855 | M1,M9        | MAP3K14-AS1, MAP3K14                                                                                                                                                                                                                                                                                                                                                                                                                                                                                                                                                                                                                                                                                                                                                                                                                                                                                                                                                                                                                                                                                                                                                                                                                                                                                 |
| chr17 | 43367855 | 43368131 | M1,M4,M9     | MAP3K14                                                                                                                                                                                                                                                                                                                                                                                                                                                                                                                                                                                                                                                                                                                                                                                                                                                                                                                                                                                                                                                                                                                                                                                                                                                                                              |
| chr17 | 43368131 | 43394325 | M1,M4        | MAP3K14                                                                                                                                                                                                                                                                                                                                                                                                                                                                                                                                                                                                                                                                                                                                                                                                                                                                                                                                                                                                                                                                                                                                                                                                                                                                                              |
| chr17 | 43394325 | 44657088 | M1,M17,M4,M9 | ARHGAP27, PLEKHM1, CRHR1, SPPL2C, MAPT, STH, KANSL1, ARL17B, LRRC37A2, ARL17A, MAP3K14, RNA5SP443, RN7SL730P, LRRC37A4P, RN7SL739P, DND1P1, RPS26P8, CRHR1-IT1, MAPT-AS1, RNU7-101P, KANSL1-AS1, RN7SL656P, NSFP1, RN7SL199P, FAM215B                                                                                                                                                                                                                                                                                                                                                                                                                                                                                                                                                                                                                                                                                                                                                                                                                                                                                                                                                                                                                                                                |
| chr17 | 44657088 | 44832735 | M4,M9        | ARL17A, NSF, RPS7P11                                                                                                                                                                                                                                                                                                                                                                                                                                                                                                                                                                                                                                                                                                                                                                                                                                                                                                                                                                                                                                                                                                                                                                                                                                                                                 |
| chr17 | 44832735 | 45259003 | M4           | NSF, WNT3, WNT9B, GOSR2, RPRML, CDC27, RNU6ATAC3P, MIR5089, LRRC37A17P, RN7SL270P                                                                                                                                                                                                                                                                                                                                                                                                                                                                                                                                                                                                                                                                                                                                                                                                                                                                                                                                                                                                                                                                                                                                                                                                                    |
| chr18 | 20936557 | 21197791 | M16          | TMEEM241, RIOK3, C18orf8, NPC1, ANKRD29                                                                                                                                                                                                                                                                                                                                                                                                                                                                                                                                                                                                                                                                                                                                                                                                                                                                                                                                                                                                                                                                                                                                                                                                                                                              |
| chr18 | 74721804 | 77037196 | M9           | BDP1P, RNA5SP461, LINC01029, RNU6-655P, MBP, GALR1, SALL3, ATP9B                                                                                                                                                                                                                                                                                                                                                                                                                                                                                                                                                                                                                                                                                                                                                                                                                                                                                                                                                                                                                                                                                                                                                                                                                                     |



|       |          |          |               |                                                                                                                                                                                                                                                                                                                                                                                                                                                                                                                                                                                                                                                                                                                                                                                                                                                                                                                                                                                                                                                                                                                                                                                                                                                                                                                                                                                                                                                                                                                                                                                                                                                                                                                                                                                                                                                                                                                                                                                                                                                                                                                                                                                                                                                                                                                                                                                                                                                                                                                                                                                                                                                                                                                                                                                                                                                                                                                                                                                                                                                                                                                                                                                                                                                                                                                                                                                                                             |
|-------|----------|----------|---------------|-----------------------------------------------------------------------------------------------------------------------------------------------------------------------------------------------------------------------------------------------------------------------------------------------------------------------------------------------------------------------------------------------------------------------------------------------------------------------------------------------------------------------------------------------------------------------------------------------------------------------------------------------------------------------------------------------------------------------------------------------------------------------------------------------------------------------------------------------------------------------------------------------------------------------------------------------------------------------------------------------------------------------------------------------------------------------------------------------------------------------------------------------------------------------------------------------------------------------------------------------------------------------------------------------------------------------------------------------------------------------------------------------------------------------------------------------------------------------------------------------------------------------------------------------------------------------------------------------------------------------------------------------------------------------------------------------------------------------------------------------------------------------------------------------------------------------------------------------------------------------------------------------------------------------------------------------------------------------------------------------------------------------------------------------------------------------------------------------------------------------------------------------------------------------------------------------------------------------------------------------------------------------------------------------------------------------------------------------------------------------------------------------------------------------------------------------------------------------------------------------------------------------------------------------------------------------------------------------------------------------------------------------------------------------------------------------------------------------------------------------------------------------------------------------------------------------------------------------------------------------------------------------------------------------------------------------------------------------------------------------------------------------------------------------------------------------------------------------------------------------------------------------------------------------------------------------------------------------------------------------------------------------------------------------------------------------------------------------------------------------------------------------------------------------------|
| chr19 | 54079950 | 54318242 | M1,M16,M9     | RN7SL317P, RNU6-698P, MIR512-1, MIR512-2, MIR1323, MIR498, MIR520E, MIR515-1, MIR519E, MIR520F, MIR515-2, MIR519C, MIR1283-1, MIR520A, MIR526B, MIR519B, MIR525, MIR523, MIR518F, MIR520B, MIR518B, MIR526A1, MIR520C, MIR518C, MIR524, MIR517A, MIR519D, MIR521-2, RNU6-803P, MIR520D, MIR517B, MIR520G, MIR516B2, MIR526A2, MIR518E, MIR518A1, RNU6-980P, MIR518D, MIR516B1, MIR518A2, MIR517C, MIR520H, RNU6-982P, MIR521-1, RNU6-751P, MIR522, MIR519A1, MIR527, MIR516A1, MIR1283-2, RNU6-1041P, MIR516A2, MIR519A2, RNU6-165P, HMGNI1P32, SEPT7P8, MIR371B, MIR371A, MIR372, MIR373, ZNF331, DPRX, NLRP12                                                                                                                                                                                                                                                                                                                                                                                                                                                                                                                                                                                                                                                                                                                                                                                                                                                                                                                                                                                                                                                                                                                                                                                                                                                                                                                                                                                                                                                                                                                                                                                                                                                                                                                                                                                                                                                                                                                                                                                                                                                                                                                                                                                                                                                                                                                                                                                                                                                                                                                                                                                                                                                                                                                                                                                                             |
| chr19 | 54318242 | 54647485 | M16,M9        | MIR935, NLRP12, MYADM, PRKCG, CACNG7, CACNG8, CACNG6, VSTM1, TARM1, OSCAR, NDUFA3, TFPT, PRPF31, CNOT3                                                                                                                                                                                                                                                                                                                                                                                                                                                                                                                                                                                                                                                                                                                                                                                                                                                                                                                                                                                                                                                                                                                                                                                                                                                                                                                                                                                                                                                                                                                                                                                                                                                                                                                                                                                                                                                                                                                                                                                                                                                                                                                                                                                                                                                                                                                                                                                                                                                                                                                                                                                                                                                                                                                                                                                                                                                                                                                                                                                                                                                                                                                                                                                                                                                                                                                      |
| chr19 | 54647485 | 55237518 | M9            | RNU6-1307P, MIR4752, VN1R104P, LENG8-AS1, VN1R105P, LILRP1, LILRP2, CNOT3, LENG1, TMC4, MBOAT7, TSEN34, RPS9, LILRB3, LILRA6, LILRB5, LILRB2, LILRA3, LILRA5, LILRA4, LAIR1, TTYH1, LENG8, LENG9, CDC42EP5, LAIR2, KIR3DX1, LILRA2, LILRB1, LILRA1, LILRB4, KIR3DL1, KIR3DL2, KIR3DL3, KIR2DL4                                                                                                                                                                                                                                                                                                                                                                                                                                                                                                                                                                                                                                                                                                                                                                                                                                                                                                                                                                                                                                                                                                                                                                                                                                                                                                                                                                                                                                                                                                                                                                                                                                                                                                                                                                                                                                                                                                                                                                                                                                                                                                                                                                                                                                                                                                                                                                                                                                                                                                                                                                                                                                                                                                                                                                                                                                                                                                                                                                                                                                                                                                                              |
| chr19 | 55237518 | 55239076 | M4,M9         | KIR3DL1, KIR3DL3, KIR2DL4                                                                                                                                                                                                                                                                                                                                                                                                                                                                                                                                                                                                                                                                                                                                                                                                                                                                                                                                                                                                                                                                                                                                                                                                                                                                                                                                                                                                                                                                                                                                                                                                                                                                                                                                                                                                                                                                                                                                                                                                                                                                                                                                                                                                                                                                                                                                                                                                                                                                                                                                                                                                                                                                                                                                                                                                                                                                                                                                                                                                                                                                                                                                                                                                                                                                                                                                                                                                   |
| chr19 | 55239076 | 55365501 | M17,M4,M9     | KIR3DL2, KIR2DP1, KIR3DP1, KIR3DL1, KIR3DL3, KIR2DL4, KIR2DL3, KIR2DL1, KIR2DS4                                                                                                                                                                                                                                                                                                                                                                                                                                                                                                                                                                                                                                                                                                                                                                                                                                                                                                                                                                                                                                                                                                                                                                                                                                                                                                                                                                                                                                                                                                                                                                                                                                                                                                                                                                                                                                                                                                                                                                                                                                                                                                                                                                                                                                                                                                                                                                                                                                                                                                                                                                                                                                                                                                                                                                                                                                                                                                                                                                                                                                                                                                                                                                                                                                                                                                                                             |
| chr19 | 55365501 | 55451834 | M17,M9        | KIR3DL2, FCAR, NCR1, NLRP7, RNU6-222P, KIR3DL1                                                                                                                                                                                                                                                                                                                                                                                                                                                                                                                                                                                                                                                                                                                                                                                                                                                                                                                                                                                                                                                                                                                                                                                                                                                                                                                                                                                                                                                                                                                                                                                                                                                                                                                                                                                                                                                                                                                                                                                                                                                                                                                                                                                                                                                                                                                                                                                                                                                                                                                                                                                                                                                                                                                                                                                                                                                                                                                                                                                                                                                                                                                                                                                                                                                                                                                                                                              |
| chr19 | 55451834 | 59095763 | M9            | NLRP7, NLRP2, GP6, RDH13, EPS8L1, PPP1R12C, TNNT1, TNN3, DNAF3, SYT5, RN7SKP109, RFPL4AP1, VN2R17P, ZNF542, PTPRH, SLC25A36P1, ZNF582-AS1, ZNF667-AS1, TMEM86B, SIGLEC31P, PPP6R1, OR5AH1P, MIMT1, RPL7AP69, VN1R107P, VN2R19P, LETM1P2, HNRNPDL4, RN7SL526P, RPS15AP36, ERVK3-1, HSPBP1, A1BG-AS1, RNA5SP473, MIR4754, RNU6-1337P, RN7SL693P, RN7SL525P, CENPBD1P1, BRSK1, TMEM150B, SUV420H2, COX6B2, FAM71E2, IL11, TMEM190, TMEM238, RPL28, UBE2S, SHISA7, ISOC2, ZNF628, NAT14, SSC5D, SBK2, SBK3, ZNF579, FIZ1, ZNF524, ZNF865, ZNF784, ZNF580, ZNF581, CCDC106, U2AF2, EPN1, NLRP9, RFPL4A, RFPL4AL1, NLRP11, NLRP4, NLRP13, NLRP8, NLRP5, ZNF787, ZNF444, GALP, ZSCAN5B, ZSCAN5C, ZSCAN5A, ZSCAN5D, ZNF582, ZNF583, ZNF667, ZNF471, ZFP28, ZNF470, ZNF71, SMIM17, ZNF835, ZIM2, PEG3, USP29, ZIM3, DUXA, ZNF264, AURKC, ZNF805, ZNF460, ZNF543, ZNF304, ZNF547, TRAPPC2P1, ZNF548, ZNF17, ZNF772, ZNF419, ZNF773, ZNF549, ZNF550, ZNF416, ZIK1, ZNF530, ZNF134, ZNF211, ZSCAN4, ZNF551, ZNF154, ZNF671, ZNF576, ZNF586, ZNF552, ZNF587B, ZNF814, ZNF587, ZNF417, ZNF418, ZNF256, C19orf18, ZNF606, ZSCAN1, ZNF135, ZSCAN18, ZNF329, ZNF274, ZNF544, ZNF8, ZSCAN22, A1BG, ZNF497, ZNF837, RP55, ZNF584, ZNF132, ZNF324B, ZNF324, ZNF446, SLC27A5, ZBTB45, TRIM28, CHMP2A, UBE2M, MZF1                                                                                                                                                                                                                                                                                                                                                                                                                                                                                                                                                                                                                                                                                                                                                                                                                                                                                                                                                                                                                                                                                                                                                                                                                                                                                                                                                                                                                                                                                                                                                                                                                                                                                                                                                                                                                                                                                                                                                                                                                                                                                                                                |
| chr2  | 45439    | 45912    | M9            | FAM110C                                                                                                                                                                                                                                                                                                                                                                                                                                                                                                                                                                                                                                                                                                                                                                                                                                                                                                                                                                                                                                                                                                                                                                                                                                                                                                                                                                                                                                                                                                                                                                                                                                                                                                                                                                                                                                                                                                                                                                                                                                                                                                                                                                                                                                                                                                                                                                                                                                                                                                                                                                                                                                                                                                                                                                                                                                                                                                                                                                                                                                                                                                                                                                                                                                                                                                                                                                                                                     |
| chr2  | 45912    | 24080284 | M14,M9        | LINC00487, RNF144A-AS1, RHOB, HS1BP3, FAM110C, GDF7, SH3YL1, C2orf43, RN7SKP112, RNU6ATAC37P, APOB, LINC00298, LINC00299, SNRPEP5, HMGB1P25, RPL30P3, RNU4-73P, MIR4261, RN7SL66P, SNORA80B, RN7SL832P, ACP1, TDRD15, RNU7-138P, KLHL29, RNU7-176P, RNU6-1081P, LINC00570, RNA5SP84, MIR4429, RNU2-13P, RNA5SP85, RN7SL674P, MIR548S, MIR4262, ATAD2B, FAM150B, TMEM18, SNTG2, TPO, MIR3681, RNU6-843P, MIR3125, LINC00276, RNU6-1288P, RNU5E-7P, PXDN, MYCNUN, MYCNOS, RN7SL104P, RN7SKP16B, ZFYVE9P2, PSMC1P10, RNU6-1215P, MIR4757, CISD1P1, LINC00954, RN7SL140P, RNU6-961P, RNU7-113P, SLC7A15P, RNA5SP86, HS1BP3-IT1, RN7SL117P, MYT1L, RNA5SP87, RN7SKP27, TSSC1, TRAPPC12, ADI1, RNA5EH1, RPS7, COLEC11, ALLC, DCCDC2, SOX11, CMPK2, RSAD2, RNF144A, ID2, KIDINS220, MBOAT2, ASAP2, ITGB1BP1, CPFSF3, IAHI, ADAM17, YWHAQ, TAF1B, GRHL1, KLF11, CYS1, RRM2, C2orf48, HPCAL1, ODC1, NOL10, ATP6V1C2, PDIA6, KCN1F, C2orf50, PQLC3, ROCK2, E2F6, GREB1, NTR52, LPIN1, TRIB2, FAM84A, NBAS, DDX1, MYCN, FAM49A, RAD51AP2, VSNL1, SMC6, GEN1, MGSN1, KCNS3, RDH14, NT5C1B-RDH14, NT5C1B, OSR1, TTC32, WDR35, MATN3, LAPTM4A, SDC1, PUM2, LINC01115, MYT1L-AS1, TSSC1-IT1, TRAPPC12-AS1, RNA5EH1-AS1, TMSB4XP2, GAPDHP48, RN7SL531P, NPM1P48, RNU6-649P, LINC01105                                                                                                                                                                                                                                                                                                                                                                                                                                                                                                                                                                                                                                                                                                                                                                                                                                                                                                                                                                                                                                                                                                                                                                                                                                                                                                                                                                                                                                                                                                                                                                                                                                                                                                                                                                                                                                                                                                                                                                                                                                                                                                                                                       |
| chr2  | 24080284 | 24087794 | M14,M2,M9     | ATAD2B                                                                                                                                                                                                                                                                                                                                                                                                                                                                                                                                                                                                                                                                                                                                                                                                                                                                                                                                                                                                                                                                                                                                                                                                                                                                                                                                                                                                                                                                                                                                                                                                                                                                                                                                                                                                                                                                                                                                                                                                                                                                                                                                                                                                                                                                                                                                                                                                                                                                                                                                                                                                                                                                                                                                                                                                                                                                                                                                                                                                                                                                                                                                                                                                                                                                                                                                                                                                                      |
| chr2  | 24087794 | 24090704 | M14,M2        | ATAD2B                                                                                                                                                                                                                                                                                                                                                                                                                                                                                                                                                                                                                                                                                                                                                                                                                                                                                                                                                                                                                                                                                                                                                                                                                                                                                                                                                                                                                                                                                                                                                                                                                                                                                                                                                                                                                                                                                                                                                                                                                                                                                                                                                                                                                                                                                                                                                                                                                                                                                                                                                                                                                                                                                                                                                                                                                                                                                                                                                                                                                                                                                                                                                                                                                                                                                                                                                                                                                      |
| chr2  | 24090704 | 24092532 | M14,M2,M9     | ATAD2B                                                                                                                                                                                                                                                                                                                                                                                                                                                                                                                                                                                                                                                                                                                                                                                                                                                                                                                                                                                                                                                                                                                                                                                                                                                                                                                                                                                                                                                                                                                                                                                                                                                                                                                                                                                                                                                                                                                                                                                                                                                                                                                                                                                                                                                                                                                                                                                                                                                                                                                                                                                                                                                                                                                                                                                                                                                                                                                                                                                                                                                                                                                                                                                                                                                                                                                                                                                                                      |
| chr2  | 24092532 | 24398043 | M11,M14,M2,M9 | ATAD2B, UBXN2A, MFSD2B, C2orf44, FKBP1B, FAM228B, TP53I3, PFN4, FAM228A, PGAM1P6, SDHCP3, RN7SL610P, RNU6-370P                                                                                                                                                                                                                                                                                                                                                                                                                                                                                                                                                                                                                                                                                                                                                                                                                                                                                                                                                                                                                                                                                                                                                                                                                                                                                                                                                                                                                                                                                                                                                                                                                                                                                                                                                                                                                                                                                                                                                                                                                                                                                                                                                                                                                                                                                                                                                                                                                                                                                                                                                                                                                                                                                                                                                                                                                                                                                                                                                                                                                                                                                                                                                                                                                                                                                                              |
| chr2  | 24398043 | 24431188 | M11,M14,M9    | FAM228A, ITS2                                                                                                                                                                                                                                                                                                                                                                                                                                                                                                                                                                                                                                                                                                                                                                                                                                                                                                                                                                                                                                                                                                                                                                                                                                                                                                                                                                                                                                                                                                                                                                                                                                                                                                                                                                                                                                                                                                                                                                                                                                                                                                                                                                                                                                                                                                                                                                                                                                                                                                                                                                                                                                                                                                                                                                                                                                                                                                                                                                                                                                                                                                                                                                                                                                                                                                                                                                                                               |
| chr2  | 24431188 | 27591560 | M14,M9        | DNAJC5G, TRIM54, UCN, ASXL2, MPV17, KIF3C, RAB10, GTF3C2, GAREML, HADHA, HADHB, EIF2B4, GPR113, EPT1, DRC1, OTOF, ITS2, C2orf70, HMGN2P20, RPL36AP13, RNA5SP88, RNU6-936P, DNAJC27-AS1, RN7SL856P, SUCLA2P3, MIR1301, TPM3P7, NCOA1, PTGES3P2, UQCRHP2, RNU6-942P, SMARCE1P6, PPL1P1, CDKN2A1NLP2, CIB4, KCNK3, AGBL5-AS1, AGBL5-IT1, SLC35F6, CENPA, DPYSL5, PTRHD1, CENPO, ADYCY3, MAPRE3, TMEM214, DNACJ27, AGBL5, EFR3B, OST4, POMC, EMILIN1, KHK, DNMT3A, CGREF1, ABHD11, RPNB, PREB, C2orf53, TCF23, SLC5A6, ATRAID, CAD, SLC30A3                                                                                                                                                                                                                                                                                                                                                                                                                                                                                                                                                                                                                                                                                                                                                                                                                                                                                                                                                                                                                                                                                                                                                                                                                                                                                                                                                                                                                                                                                                                                                                                                                                                                                                                                                                                                                                                                                                                                                                                                                                                                                                                                                                                                                                                                                                                                                                                                                                                                                                                                                                                                                                                                                                                                                                                                                                                                                     |
| chr2  | 27591560 | 27873678 | M9            | EIF2B4, SNX17, ZNF513, PPM1G, NRBP1, KRTPAP3, IFT172, FTH1P3, RNU6-986P, FNDC4, GCKR, C2orf166, ZNF512, CCDC121, GPN1                                                                                                                                                                                                                                                                                                                                                                                                                                                                                                                                                                                                                                                                                                                                                                                                                                                                                                                                                                                                                                                                                                                                                                                                                                                                                                                                                                                                                                                                                                                                                                                                                                                                                                                                                                                                                                                                                                                                                                                                                                                                                                                                                                                                                                                                                                                                                                                                                                                                                                                                                                                                                                                                                                                                                                                                                                                                                                                                                                                                                                                                                                                                                                                                                                                                                                       |
| chr2  | 27873711 | 74185272 | M9            | MIR558, MIR4765, LINC00486, RNA5SP91, RNA5SP92, ATP6V0E1P3, HNRNPA1P61, PPP1CB, RNU6-1145P, MYADM, SLC25A5P2, RPS24P7, RN7SL602P, MIR548AD, RNU6-1117P, MRPL50P1, PPM1B, FAM136A, MIR5192, RN7SL51P, RNU6-577P, RNU6-846P, RN7SL18P, PSAT1P2, RSL24D1P2, RNU6-939P, RNU6-1116P, SPDYA, LINC00211, RMDN2-AS1, CYP1B1-AS1, ETAA1, RNU6-951P, RPL7P12, GAPDHP25, CID, RPLP0P6, TGFA, DBIL5P2, TTC39DP, ASS1P2, RPS4XP5, RNU6-851P, RN7SL96P, SOS1-IT1, HNRNPA1P66, RNU6-198P, HSPE1P13, RNU6-1185P, LINC00309, MIR4433, TRMT61B, WDR92, RNU6-100P, SLC8A1-AS1, RN7SL341P, RN7SL211P, RNU6-548P, HNRNPA1P57, LDHAP3, RNU4-63P, WDR43, ADD2, RNU6-137P, FTOP1, RNU6-242P, RNU6-958P, RN7SL635P, VTRNA2-2P, KRT18P33, MIR4778, MEIS1-AS3, MEIS1-AS2, FAM161A, PNO1, RN7SKP66, RNU6-1048P, RNU6-566P, SIX3-AS1, MIR3126, RNA5SP96, RNU6-1216P, LINC01211, RN7SL604P, SNORA36C, SLC3A1, RN7SL141P, RN7SL817P, PCBP1-AS1, PPP3R1, BCRYN1, RN7SKP119, MIR559, FAM179A, CNRIP1, RNU6-688P, RPL36AP15, PLEK, CCT4, RN7SKP224, RNU4-49P, RNU6-282P, TPT1P11, TCEB2P3, CTBP2P5, RNU6-439P, RPL7P13, KNOP1P3, CRYGGP, C2orf71, FBXO48, CLIP4, CYP26B1, ZNF863P, FTH1P6, MIR4431, APLF, RNU6-997P, MIR3682, HMGB1P31, RNU7-172P, RPL23AP32, RNU7-81P, RNU6-433P, EXOC6B, PRORS1P, PROKR1, RN7SL470P, MIR1285-2, BRD7P6, TGFA-IT1, HMGN2P21, ARHGAP25, LINC01143, TCEB1P21, RN7SL160P, OR7E91P, OR7E46P, OR7E62P, BTF3P5, RNU6-105P, RPS20P10, RNU6-775P, RNU6-221P, RNU6-634P, RNU6-39P, RN7SKP208, MIR217, MIR216A, MIR216B, RNA5SP93, RNU6-111P, ALK, ALMS1-IT1, ALMS1P, EIF3FP3, DGUOK-AS1, LINC01122, SPR, RNU6-508P, RNA5SP94, EMX1, RNU1-32P, MIR4432, RN7SL361P, RNU6-612P, ATP1B3P1, RN7SL632P, RNU4-51P, NONOP2, FIGLA, RNA5SP95, CLEC4F, CD207, SNORA70B, COMMD1, B3GNT2, SFXN5, VAX2, ATP6V1B1, TMEM17, EHBP1, BMP10, GKN2, GKN1, PREPL, RAB11FIP5, YPEL5, LBH, LCLAT1, ANKRD53, NOTO, SMYD5, TEX261, ANTXR1, OTX1, CAPN13, PRADC1, WDCPP, NAGK, CCT7, GFPT1, CAMKMT, GALNT14, NFU1, MCEE, MPHOSPH10, MDH1, PAIP2B, ZNF638, CAPN14, UGP2, SIX3, AAK1, SIX2, SRBD1, MIR4263, SNRPGP7, RNA5SP89, FBXO41, SNORD92, SNORD53, RN7SL516P, EHD3, RNA5SP90, SRD5A2, XDH, KRT18P52, AK2P2, DD50P1, RNU6-647P, ANXA4, EGR4, ALMS1, MEMO1, PRKCE, VPS5A, BIRC6-AS1, NAT8, TPRKB, GMCL1, DUSP11, DYP30, SPAST, SLC30A6, PELI1, SNRNP27, LGALS1, MXD1, EPAS1, AFTPH, GPN1, ASPRV1, PCBP1, C2orf42, NLR4, YIPF4, BIRC6, TMEM247, SERTA02, DYSF, ATP6V1E2, RHOO, SLC1A4, SUTP7L, TIA1, SLC4A1AP, TTC27, MRPL33, RBKS, CEP68, LTBP1, PCYOX1, RAB1A, SNRPG, BRE, PIGF, ACTR2, SPRED2, FOSL2, PLB1, MEIS1, CRIPT, RASGRP3, SOCS5, LINC01118, LINC01119, MCFD2, FAM98A, C2orf78, STAMBP, CRIM1, FEZ2, ACTG2, TTC7A, DGUOK, VIT, C2orf61, STRN, HEATR5B, GPATCH11, CALM2, EIF2AK2, SULT6B1, CEBPZ-AS1, CEBPZ, EPCAM, MSH2, NDUFAF7, PRK3, OPCT, CDC42EP3, KCNK12, RMDN2, MSH6, CYP1B1, ATL2, HNRNPLL, GALLM, FBXO11, SRSF7, GEMIN6, DHX57, MORNE2, ARHGFEF33, SOS1, CDKL4, FOXN2, PPP1R21, MAP4K3, TMEM178A, THUMPD2, SLC8A1, C2orf91, PKDCC, EML4, COX7A2L, KCNG3, MTA3, OXER1, HAAO, STON1, THADA, STON1-GTF2A1L, ZFP36L2, GTF2A1L, PLEKHK12, DYNC2L11, LHCGR, ABCG5, ABCG8, FSHR, LRPPRC, NRXN1, GPR75-ASB3, CHAC2, ERLEC1, GPR75, PSME4, ACYP2, TSPYL6, C2orf73, SPTBN1, EML6, RTN4, CLHC1, RPS27A, MTIF2, CCDC88A, CCDC104, SMEK2, PNPT1, EFEMP1, CCDC85A, VRK2, FANCL, BCL11A, PAPOLG, REL, PUS10, PEX13, KIAA1841, C2orf74, AHS2, USP34, XPO1 |
| chr2  | 74185272 | 74454257 | M17,M9        | DGUOK-AS1, RNA5SP97, FNBP1P1, BOLA3-AS1, DGUOK, TET3, BOLA3, MOB1A, MTHFD2, SLC4A5                                                                                                                                                                                                                                                                                                                                                                                                                                                                                                                                                                                                                                                                                                                                                                                                                                                                                                                                                                                                                                                                                                                                                                                                                                                                                                                                                                                                                                                                                                                                                                                                                                                                                                                                                                                                                                                                                                                                                                                                                                                                                                                                                                                                                                                                                                                                                                                                                                                                                                                                                                                                                                                                                                                                                                                                                                                                                                                                                                                                                                                                                                                                                                                                                                                                                                                                          |
| chr2  | 74454257 | 92130494 | M9            | RNU7-64P, RN7SL251P, RN7SL830P, RN7SL126P, RNU1-38P, RN7SKP83, SNORD94, MIR4779, RNU6-640P, ANAPC1P1, MIR4771-1, MIR4771-2, LINC00152, MIR4435-2, MIR4435-1, MTATP8P2, INO80B, RNU2-63P, MIR4780, RNY4P15, MRPL45P1, RNU6-568P, RNU6-1168P, RNU6-1007P, FOXI3, ANKRD36BP2, WBP1, MOGS, MRPL53, MIR4436A, IGKV7-3, PGBD4P5, IGKV2-4, IGKV2-10, IGKV1-13, IGKV2-14, IGKV2-18, IGKV2-19, IGKV1-22, IGKV2-23, IGKV3-25, IGKV2-26, IGKV2-29, IGKV3-31, IGKV1-32, IGKV3-34, IGKV1-35, IGKV2-36, IGKV2-38, IGKV2-39, IGKV2D-38, IGKV2D-36, IGKV1D-35, IGKV3D-34, IGKV1D-32, IGKV3D-31, IGKV1D-27, CCDC142, IGKV3D-25, IGKV2D-23, IGKV1D-22, KRT18P26, RNU6-542P, NECAP1P2, IGKV2D-19, IGKV2D-18, TAF13P2, IGKV2D-19, TAF13P2, IGKV2D-19, TAF13P2, IGKV2D-19, TAF13P2, DCTN1-AS1, IGKV2D-10, HMGATP8, IGKV10R2-11, LBX2-AS1, TVP23BP2, MIR5000, GAPDHP57, RNA5SP100, DRD5P1, SUCLA2P2, RN7SKP203, RN7SKP164, RNA5SP98, GG78P, IGKV10R-1, ABCD1P5, PABPC1P6, CYCSP6, TTC31, SLC9B1P2, RNU6-827P, RNU6-812P, REG1P, ACTR3BP2, RNU6-561P, MIR4264, RNA5SP99, RN7SL201P, RNU6-685P, MTND4P25, MTND5P27, RPL27P10, LBX2, PCGF1, RNU6-1312P, ST6GALNAC2P1, FUND02P2, DUXAP1, LDHAP7, RPL312P18, LSM3P3, TCF7L1-IT1, RNU6-674P, PEBP1P2, RN7SL113P, RNU7-162P, TLX2, DQX1, AUP1, HTRA2, LOXL3, DOK1, M1AP, SEMA4F, HK2, POLE4, TACR1, EVA1A, MRPL19, GCFC2, LRRTM4, REG3G, REG1B, REG1A, REG3A, CTNNA2, LRRTM1, SUCLG1, DNAH6, TRABD2A, TMSB10, KCMF1, TCF7L1, TGOLN2, RETSAT, ELMOD3, SLC4A5, CAPG, SH2D6, DCTN1, MAT2A, GGXC, VAMP8, VAMP5, RNF181, CTRF81, TMEM150A, WDR54, RTKN, USP39, C2orf68, SFTPB, GNLY, ATOH8, ST3GAL5, POLR1A, PTCD3, IMMT, MRPL35, REEP1, KDM3A, CHMP3, RNF103-CHMP3, RNF103, RMDN5A, CD8A, CD8B, RGPD1, PLGLB1, IGKV3OR2-268, PLGLB2, RGPD2, KRCC1, SMYD1, FABP1, THNSL2, TEX37, EIF2AK3, RPIA, IGKC, IGKJ5, IGKJ4, IGKJ3, IGKJ2, IGKJ1, IGKV1-5, IGKV1-6, IGKV3-7, IGKV1-8, IGKV1-9, IGKV1-5, IGKV1-12, IGKV3-15, IGKV1-16, IGKV1-17, IGKV3-20, IGKV6-21, IGKV2-24, IGKV1-27, IGKV2-28, IGKV2-30, IGKV1-33, IGKV1-37, IGKV1-39, IGKV2-40, IGKV2D-40, IGKV1D-39, IGKV1D-37, IGKV1D-33, IGKV2D-30, IGKV2D-29, IGKV2D-28, IGKV2D-26, IGKV2D-24, IGKV6D-21, IGKV3D-20, IGKV6D-41, IGKV1D-17, IGKV1D-16, IGKV3D-15, IGKV1D-13, IGKV1D-12, IGKV3D-11, IGKV1D-42, IGKV1D-43, IGKV1D-8, IGKV3D-7                                                                                                                                                                                                                                                                                                                                                                                                                                                                                                                                                                                                                                                                                                                                                                                                                                                                                                                                                                                                                                                                                                                     |





|       |           |           |        |                                                                                                                                                                                                                                                                                                                                                                                                                                                                                                                                                                                                                                                                                                                                                                                                                                                                                                                                                                                                                                                                                                                                                                                                                                                                                                                                                                                                                                                                                                                                                                                                                                                                                                                                                                                                                                                                                                                                                                                                                                                                                                                                                                                                                                                                                                                                                                                                                                                                                                                                                                                                                                                                                                                                                                                                                                                                                                                                                                                                                                                                                                                                                                                                                                                                                                                                                                                                                                                                                                                                                                                                                                                                                                                                                                                                                                                                                                                                                                                                                                                                                                                                                                                                                                                                                                                                                                                                                                                                                                                                                                                                                                                                                                                                                                                                                                                                                                                                                             |
|-------|-----------|-----------|--------|-------------------------------------------------------------------------------------------------------------------------------------------------------------------------------------------------------------------------------------------------------------------------------------------------------------------------------------------------------------------------------------------------------------------------------------------------------------------------------------------------------------------------------------------------------------------------------------------------------------------------------------------------------------------------------------------------------------------------------------------------------------------------------------------------------------------------------------------------------------------------------------------------------------------------------------------------------------------------------------------------------------------------------------------------------------------------------------------------------------------------------------------------------------------------------------------------------------------------------------------------------------------------------------------------------------------------------------------------------------------------------------------------------------------------------------------------------------------------------------------------------------------------------------------------------------------------------------------------------------------------------------------------------------------------------------------------------------------------------------------------------------------------------------------------------------------------------------------------------------------------------------------------------------------------------------------------------------------------------------------------------------------------------------------------------------------------------------------------------------------------------------------------------------------------------------------------------------------------------------------------------------------------------------------------------------------------------------------------------------------------------------------------------------------------------------------------------------------------------------------------------------------------------------------------------------------------------------------------------------------------------------------------------------------------------------------------------------------------------------------------------------------------------------------------------------------------------------------------------------------------------------------------------------------------------------------------------------------------------------------------------------------------------------------------------------------------------------------------------------------------------------------------------------------------------------------------------------------------------------------------------------------------------------------------------------------------------------------------------------------------------------------------------------------------------------------------------------------------------------------------------------------------------------------------------------------------------------------------------------------------------------------------------------------------------------------------------------------------------------------------------------------------------------------------------------------------------------------------------------------------------------------------------------------------------------------------------------------------------------------------------------------------------------------------------------------------------------------------------------------------------------------------------------------------------------------------------------------------------------------------------------------------------------------------------------------------------------------------------------------------------------------------------------------------------------------------------------------------------------------------------------------------------------------------------------------------------------------------------------------------------------------------------------------------------------------------------------------------------------------------------------------------------------------------------------------------------------------------------------------------------------------------------------------------------------------------------------|
| chr21 | 30953803  | 35472860  | M14    | GRIK1-AS1, LINC00307, RPL8P2, KRTPAP13-6P, MIR4327, KRTPAP13-5P, KRTPAP19-9P, KRTPAP19-10P, KRTPAP19-11P, KRTPAP21-4P, KRTPAP8-2P, KRTPAP8-3P, KRTPAP7-1, UBE3AP2, FBXW11P1, HMGN1P2, TPT1P1, HUNK-AS1, LINC00159, MIS18A-AS1, RN7SL109P, SNORA80, EXOSC3P1, RNA5SP490, LINC00846, OR7E23P, PAXBP1-AS1, LINC00945, IL10RB-AS1, USF1P1, RPS5P3, BTF3P6, LINC00649, RN7SL740P, BACH1, GRIK1, GRIK1-AS2, CLDN17, CLDN8, KRTPAP24-1, KRTPAP25-1, KRTPAP26-1, KRTPAP27-1, KRTPAP23-1, KRTPAP13-2, KRTPAP13-1, KRTPAP13-3, KRTPAP13-4, KRTPAP15-1, KRTPAP19-1, KRTPAP19-2, KRTPAP19-3, KRTPAP19-4, KRTPAP19-5, KRTPAP19-6, KRTPAP19-7, KRTPAP22-2, KRTPAP6-3, KRTPAP6-2, KRTPAP22-1, KRTPAP6-1, KRTPAP20-2, KRTPAP20-3, KRTPAP21-3, KRTPAP21-2, KRTPAP21-1, KRTPAP11-1, KRTPAP19-8, TIAM1, SOD1, SCAF4, HUNK, MIS18A, MRAP, URB1, C21orf119, EVA1C, TCF10P, C21orf59, SYNU1, PAXBP1, C21orf49, C21orf62, OLIG2, OLIG1, C21orf54, IFNAR2, IL10RB, IFNAR1, IFNGR2, TMEM50B, DNAJC28, GART, SON, DONSON, CRZYL1, ITSN1, ATP5O, MRPS6, SLC5A3                                                                                                                                                                                                                                                                                                                                                                                                                                                                                                                                                                                                                                                                                                                                                                                                                                                                                                                                                                                                                                                                                                                                                                                                                                                                                                                                                                                                                                                                                                                                                                                                                                                                                                                                                                                                                                                                                                                                                                                                                                                                                                                                                                                                                                                                                                                                                                                                                                                                                                                                                                                                                                                                                                                                                                                                                                                                                                                                                                                                                                                                                                                                                                                                                                                                                                                                                                                                                                                                                                                                                                                                                                                                                                                                                                                                                                                                                                                         |
| chr22 | 41318336  | 42180424  | M16    | MIR1281, RNU6-375P, LRRRC37A1P, RNU6-495P, RNU6-476P, HMGN2P10, RNU6ATAC22P, XPNPEP3, RBX1, EP300, L3MBTL2, CHADL, RANGAP1, ZC3H7B, TEF, TOB2, PHF5A, ACO2, POLR3H, CSDC2, PMM1, DESI1, XRCC6, NHP2L1, C22orf46, MEI1                                                                                                                                                                                                                                                                                                                                                                                                                                                                                                                                                                                                                                                                                                                                                                                                                                                                                                                                                                                                                                                                                                                                                                                                                                                                                                                                                                                                                                                                                                                                                                                                                                                                                                                                                                                                                                                                                                                                                                                                                                                                                                                                                                                                                                                                                                                                                                                                                                                                                                                                                                                                                                                                                                                                                                                                                                                                                                                                                                                                                                                                                                                                                                                                                                                                                                                                                                                                                                                                                                                                                                                                                                                                                                                                                                                                                                                                                                                                                                                                                                                                                                                                                                                                                                                                                                                                                                                                                                                                                                                                                                                                                                                                                                                                       |
| chr22 | 50656186  | 50965085  | M14    | RN7SL500P, TUBGCP6, HDAC10, MAPK11, PLXNB2, DENND6B, PPP6R2, SBF1, ADM2, MIOX, LMF2, NCAHP2, SCO2, TYMP                                                                                                                                                                                                                                                                                                                                                                                                                                                                                                                                                                                                                                                                                                                                                                                                                                                                                                                                                                                                                                                                                                                                                                                                                                                                                                                                                                                                                                                                                                                                                                                                                                                                                                                                                                                                                                                                                                                                                                                                                                                                                                                                                                                                                                                                                                                                                                                                                                                                                                                                                                                                                                                                                                                                                                                                                                                                                                                                                                                                                                                                                                                                                                                                                                                                                                                                                                                                                                                                                                                                                                                                                                                                                                                                                                                                                                                                                                                                                                                                                                                                                                                                                                                                                                                                                                                                                                                                                                                                                                                                                                                                                                                                                                                                                                                                                                                     |
| chr3  | 238649    | 9729575   | M11,M9 | CHL1, CNTN6, CNTN4, IL5RA, TRNT1, CRBN, SUMF1, LRRN1, SETMAR, ITPR1, BHLHE40, ARL8B, EDEM1, GRM7, LMCD1, SSUH2, CAV3, OXTR, RAD18, SRGAP3, THUMPD3, SETD5, LHFP4, MTMR14, CHL1-AS2, RNU6-1194P, RPS8P6, CHL1-AS1, RN7SL120P, RPL23AP39, RPL21P17, RN7SKP144, CNTN4-AS2, DNAJC19P4, CNTN4-AS1, PNPT1P1, MRPS10P2, ITPR1-AS1, EGOT, BHLHE40-AS1, RNU610P1, UBTF18, MIR4790, RN7SL553P, GRM7-AS3, MRPS36P1, GRM7-AS2, GRM7-AS1, LMCD1-AS1, RNU4ATAC17P, LINC000312, OR7E122P, SRGAP3-AS1, SRGAP3-AS2, SRGAP3-AS3, SRGAP3-AS4, PGAM1P4, SETD5-AS1, DUSP5P2                                                                                                                                                                                                                                                                                                                                                                                                                                                                                                                                                                                                                                                                                                                                                                                                                                                                                                                                                                                                                                                                                                                                                                                                                                                                                                                                                                                                                                                                                                                                                                                                                                                                                                                                                                                                                                                                                                                                                                                                                                                                                                                                                                                                                                                                                                                                                                                                                                                                                                                                                                                                                                                                                                                                                                                                                                                                                                                                                                                                                                                                                                                                                                                                                                                                                                                                                                                                                                                                                                                                                                                                                                                                                                                                                                                                                                                                                                                                                                                                                                                                                                                                                                                                                                                                                                                                                                                                      |
| chr3  | 9729575   | 47021402  | M9     | CCR8, SLC25A38, SLC6A11, RPSA, SLC6A1, RNU6-905P, RHBDP1P1, HRH1, FGD5-AS1, ATG7, MOB1P, MYRIP, RPS3AP53, COL6A4P1, VGLL4, EIF1B, ENTDP3, SH3BP5-AS1, RNU6-454P, HMGN2P7, RNU6-1024P, EAF1-AS1, MIR4270, RN7SL110P, MIR3134, RN7SL4P, MIR563, LINC00690, MIR3714, RPL14, PLCL2-AS1, PDCL3P3, ZNF619, TAMM41, TIMP4, ZNF620, ZNF621, RAD23BP1, RNU6-138P, MIR4791, HSPA8P18, PPARC, CTNNB1, RNU4-85P, MIR3135A, SGOL1-AS1, RNY4P22, RNU6-822P, RNU6-815P, VENTXP7, ZNF385D-AS1, ZNF385D-AS2, HMGB1P5, RANP7, SALL4P5, RPL24P7, UBE2E2-AS1, TSEN1, ULK4, RNU6-922P, RNU6-788P, UBE2E1-AS1, LINC00691, NPM1P23, RPL31P20, THR8-IT1, THR8-AS1, MIR4792, EIF3K2P, TRAK1, RN7SL216P, RNA5SP125, CFL1P7, RNA5SP126, MIR4442, CRIP1P2, TAF9BP1, RPEP2, HMGB3P12, C3orf83, MKRN2, RAF1, VENTXP4, MINOS1P3, CCK, LYZL4, RNU6-342P, RN7SL859P, RPS20P15, VIPR1, RNU1-96P, FAM96AP1, LINC00693, TMEM40, MESTP4, RBMS3-AS3, RPS12P5, RBMS3-AS2, RBMS3-AS1, CN2P6, SEC22C, RNA5SP127, THR3P3P1, OSBPL10-AS1, ZNF587P1, RPL21P40, NIFKFP, KRT18P15, IGBP1P3, RPL30P4, CNOT10-AS1, SUGT1P2, SEC13P1, SUMO2P10, RN7SL296P, CAND2, RNU7-110P, RNA5SP128, COX6CP10, SDAD1P3, FECHP1, KRT8P18, RNU6-243P, RPL32, ARPP21-AS1, MIR128-2, SS18L2, NKTR, IQSEC1, RFC3P1, NBP2P1P, NUP210, RN7SKP227, HSPD1P6, ZBTB47, RNU6ATAC4P, PRADC1P1, RPL29P11, UBE2D3P2, KLHL40, CCDC13, RNU6-1301P, HDAC11, HHATL, UBE2FP1, TCEA1P1, RNA5SP129, RNU7-73P, HIGD1A, RPL21P135, NDUFA4P3, MIR26A1, PPP2R2DP1, ACKR2, MTMR14, RNU6-235P, DLEC1P1, ACVR2B-AS1, DDTP1, RPL18AP7, CPN9E, KRBOX1, FBLN2, RNU6-1227P, DSTNP4, HNRNPA1P21, CYP8B1, ZNF662, BRPF1, EEF1A1P24, SNORA6, SNORA6P, RNU4-56P, RN7SL411P, ENTDP3-AS1, PGAM1P3, RNU5B-2P, RPL5P10, EEF1GP3, HMGN2P4, FAM198A, POMGN2, OGG1, SNRK, WNT7A, RN7SKP58, ATP6V0E1P2, CAMK1, RPL36P20, TPMT2P, RNU4-78P, SALL4P6, ANO10, EIF4BP4, TADA3, ARPC4, VIPR1-AS1, RN7SL567P, HHATL-AS1, ARPC4-TLL3, CCDC13-AS1, HNRNPA1P22, KRBOX1-AS1, TLL3, RN7SL517P, SNRK-AS1, RPUSD3, ABH5, CIDEC, JAGN1, TOPAZ1, RNU6-367P, MIR138-1, IL17RE, TCAIM, LINC00694, EI24P3, MPRIPP1, ZNF197-AS1, SOCS5P3, MIR564, RPL12P44, RNU5B-3P, RPS24P8, LARS2-AS1, LIMD1-AS1, RN7SL145P, NRRF2P2, FLT1P1, IL17RC, UQCRC2P1, ZNF445, PRSS44, ZNF852, ZKSCAN7, CRELD1, PRRT3, ZNF660, ZNF197, EMC3, FANCD2, ZNF35, ZNF502, ZNF501, TPRXL, CHCHD4, TMEM43, KIAA1143, KIF15, FANCD2OS, BRK1, IHL, IRAK2, XPC, TATDN2, LSM3, GHRL, SLC6A6, SEC13, TMEM42, TGM4, CCDC174, ATP2B2, ZDHHC3, C3orf20, FGD5, EXOSC7, NR2C2, CLEC5B, CDOP1, MRPS25, ZFYVE20, TMEM158, LARS2, ZFYVE20, SH3BP5, LIMD1, SACM1L, METTL6, EAF1, COLQ, SLC6A20, LZTFL1, HACL1, CCR9, BTD, FYCO1, ANKR028, CXCR6, XCR1, GALNT15, CCR3, DPH3, OXNAD1, CCR1, CCR2, CCR5, CCR2L2, LTF, RFTN1, DAZL, PLCL2, TBC1D5, RTP3, LRRC2, TDGF1, SATB1, KCNH8, ALS2CL, EFHB, RAB5A, PP2D1, KAT2B, TMIE, PRSS50, PRSS46, PRSS45, SGOL1, PRSS42, MYL3, PTH1R, ZNF385D, CCDC12, UBE2E2, NBAL2, UBE2E1, NKIRAS1, RPL15, NR1D2, THR8, RARB, TOP2B, NGLY1, OXSM, LINC00692, LRR3C3B, NEK10, SLC4A7, EOMES, CDC1, AZI2, ZICCP22, RBMS3, TGFBR2, GADL1, STT3B, OSBPL10, ZNF880, GPD1L, CMTM8, CMTM7, CMTM6, DYNCL1L1, CNOT10, TRIM71, CCR4, GLB1, TMMPPE, CRTAP, SUSD5, FBXL2, UBP1, CLASP2, PDCD6IP, ARPP21, STAC, DCLK3, TRANK1, EPM2AIP1, MLH1, LRRFIP2, COLGA4, C3orf35, ITGA9, CTDSPL, VILL, PLCD1, DLEC1, ACAA1, MYD88, OXSR1, SLC22A13, SLC22A14, XYLB, ACVR2B, EXOG, SCN5A, SCN10A, SCN11A, WDR4, GORASP1, TTC21A, CSRN1P, XIRP1, CX3CR1, RNU6-882P, PRRT3-AS1, EMC3-AS1, CYCSPP10, CIDEC, RNU6-670P, CYCSP11, RNU6-814P, LINC00852, GHRLOS, MIR378B, MIR885, AT2B2-IT1, AT2B2-IT2, LINC00606, SLC6A1-AS1, CHCHD4P4, FANCD2P2, FANCD2P2, RNU210P2, MARK2P14, RN7SL147P, SYN2, ACTG1P12, GSTM5P1, RNU6-404P, RNA5SP123, RNU6-377P, CRIP1P1, KRT18P17, SNORA7A, HDAC11-AS1, LINC00620, VN1R20P, FGD5P1, VN1R21P, RNA5SP124, GRIP2, RNU6-511P, HMGN1P7, RBBP4P2, RNU7-108P, ARMC10P1, WDR82P1, LINC00876, MIR5816, MTHFD2P1, HNRNKP4, RNU6-1094P, RPL18AP8, RCC2P5, CDV3P1, HNRNPA1P, RNA5AC4P, POU5F1P7, OR5H5P, OR5H3P, OR5H4P, OR5H7P, UBFD1P1, RPL38P4, WWP1P1, ST3GAL6-AS1, PDLIM1P4, RNU6-26P, RNU6-1263P, LINC00973, ACTG1P13, MIR3921, VT11BP1, GMFBP1, RNU6-865P, ACTR3P3, ZNF90P1, FAM172BP, RNU6-1256P, ZBTB11-AS1, PDCL3P4, RNU6-461P, RNU1-43P, NDUFA4P2, MIR5484B, TUBBP11, LINC00882, FCF1P3, MTND4P16, MTND3P6, MTND5P16, MTND6P6, MTND1P16, MTND2P14, RNU6-1308P, LINC00883, LINC00635, LINC00636, HNRNPA1P17, PROS1, ARL13B, STX19, DHFR1L1, SUN3, MTRNR2L12, EPHA6, ARL6, CRYBG3, MINA, GABRR3, OR5AC1, OR5AC2, OR5H1, OR5H14, OR5H15, OR5H6, OR5H2, OR5H8P, OR5K4, OR5K1, OR5K2, CLDN1, CPOX, GPR15, ST3GAL6, DCBLD2, COL8A1, CMSS1, F1LIP1L, TMEM30C, TBC1D23, NIT2, TOMM70A, LNP1, TMEM45A, GPR128, TFG, ABI3BP, IMPG2, SENP7, TRMT10C, PCNP, ZBTB11, RPL24, CEP97, NXPE3, NFKBIZ, ZPLD1, ALCAM, CBLB, CCDC54, BRX, CD047, IFIT57, HHLA2, MYH15, KIAA1524, DZIP3, RETNLB, TRAT1, GUCA1C, MORC1 |
| chr3  | 108819263 | 108819263 | M9     | MORC1-AS1, LINC00488, RNU6-1236P, H3F3AP3, PPIAP15, MORC1, DPPA2, DPPA4                                                                                                                                                                                                                                                                                                                                                                                                                                                                                                                                                                                                                                                                                                                                                                                                                                                                                                                                                                                                                                                                                                                                                                                                                                                                                                                                                                                                                                                                                                                                                                                                                                                                                                                                                                                                                                                                                                                                                                                                                                                                                                                                                                                                                                                                                                                                                                                                                                                                                                                                                                                                                                                                                                                                                                                                                                                                                                                                                                                                                                                                                                                                                                                                                                                                                                                                                                                                                                                                                                                                                                                                                                                                                                                                                                                                                                                                                                                                                                                                                                                                                                                                                                                                                                                                                                                                                                                                                                                                                                                                                                                                                                                                                                                                                                                                                                                                                     |
| chr3  | 108819263 | 109214014 | M2,M9  | ITGB5-AS1, ENO1P3, RNA5SP137, RNU6-230P, MIR5092, DUTP1, RNU6-232P, OR7E130P, OR7E29P, OR7E93P, OR7E53P, OR7E97P, MIR5481, RPS3AP14, ENPP7P4, FAM86JP, ALDH1L1-AS1, ALDH1L1-AS2, WDR52, RNA5SP138, NUP210P1, RCC2P4, SPICE1, SIDT1, KIAA2018, NAA50, ATP6V1A, GRAMD1C, ZNF123, KIAA1407, QTRTD1, DRD3, ZNF80, TIGIT, ZBTB20, GAP43, LSAMP, IGSF11, C3orf30, UPK1B, MIR4445, B4GALT4, RNU6ATAC15P, PVRL3-AS1, ATP6V0CP2, PLCXD2-AS1, RFKP2, MIR567, OR7E100P, ARHGAP31, TMEM39A, WDR52-AS1, SIDT1-AS1, MIR4446, RN7SL767P, VPS26AP1, POGTLU11, MIR568, ZBTB20-AS1, ZBTB20-AS2, MIR4796, ZBTB20-AS3, YBX1P3, ZBTB20-AS4, RN7SL815P, LSAMP-AS1, LINC00903, RN7SL582P, BZW1P2, TIMMDC1, TUSC7, MIR4447, LINC00901, RNU5E-8P, PTMAP8, CD80, RNU6-1200P, ADPRH, PLA1A, IGSF11-AS1, B4GALT4-AS1, RPS26P21, ARHGAP31-AS1, RNU6-1127P, PHBP8, RN7SL762P, RN7SL397P, NAP1L1P3, MIR5682, RPL7A11, RN7SL172P, RNU4-62P, POPDC2, HNRNPA1P23, EIF4BP8, MYLK-AS1, MYLK-AS2, MIR5002, RPL7P15, RNU6-143P, MIR544B, COX17, MAATS1, NR1I2, GSK3B, GPR156, LRRCS58, FSTL1, NDUFB4, HGD, RABL3, GTF2E1, STXBP5L, POLQ, ARGFX, HROX40, HCLS1, GOLGB1, IQCB1, EAF2, SLC15A2, ILDR1, CD86, CASR, CSTA, CCDC58, FAM162A, WDR5B, KPNA1, PARP9, DTX3L, PARP15, PARP14, HSPBAP1, DIRC2, SEMA5B, PDIA5, SEC22A, ADCY5, PTPBL, MYLK, CCDC14, ROPN1, KALRN, UMPS, ITGB5, MUC13, HEG1, SLC12A8, ZNF148, SNX4, OSBPL11, ALG1L, ROPN1L, SLC41A3, ALDH1L1, KLF15, CCDC37, ZXDC, UROCC1, CHST13, C3orf22, TXNRR2, TXNRR3NB, CHCHD6, PLXNA1, PVRL3, CD96, ZBED2, PLCXD2, PHLD2, ABHD10, TAGLN3, TMPRSS7, C3orf62, GCSAM, SLC9C1, CD200, BTLA, ATG3, SLC35A5, CCDC80, CD200R1L, CD200R1, GTPPB8, C3orf17, BOC, GMPS, ANAPC13, ARL14, PPM1L, FOXL2, CEP63, C3orf72, PRR23A, B3GALNT1, MRPS22, KCNAB1, PRR23B, PRR23C, COPB2, EPHB1, NMD3, RBP2, RBP1, KY, NMNAT3, SSR3, TIPARP, LEKR1, PPR2R3A, CLSTN2, CCNL1, TRIM42, SLC25A36, ACPP, MSL2, SPSB4, ACPL2, PCCB, VEPH1, DNAJC13, NIP7P2, HSPA8P19, NHPH3-AS1, ZBTB38, PTX3, C3orf55, ACAD11, BFSP2-AS1, SHOXT2, TFP1, RNU6-678P, RNA5SP140, HMGB3P14, RPL39P5, STAG1, HMGN1P9, HMGB3P13, MIR4788, RNU6-1174P, RNA5SP141, TDGF1P6, RNU6-1284P, RNY4P4, HMGN1P10, RNU7-198P, RNU6-789P, RSRRC1, CNKAB1-AS1, TIPARP-AS1, RNA5SP142, NPM1P17, HSPA8P9, KRT8P36, GAPDHP39, RPL23AP40, SLC35G2, RASA2, NCK1, MLF1, EEF1A1P25, ATP5G1P3, RPL71P7, BPESC1, RNU6-736P, ACTG1P1, RN7F, GRK7, IL20RB, ATP1B3, GF1M1, SOX14, CLDN18, TFDP2, ACKR4, RN7SKP124, RN7SL724P, TRMT112P5, CLSTN2-AS1, UBA5, KRT18P35, RASA2-IT1, YYHAOP6, TPT1P3, DZIP1L, HMGN2P25, RNU6-509P, ATP1B3-AS1, RNU6-425P, RNU6-1294P, RNU1-100P, RPL6P9, RNA5SP143, PLS1-AS1, RN7SKP25, RNU7-47P, TMEM108, AAGNT, DBR1, BFSP2, PBX2P1, SLC9A9-AS1, SLC9A9-AS2, ARMC8, GAPDHP47, LXN, ST13P15, RARRES1, RNA5SP144, GM2AP1, RPL21P39, MFSD1, CDV3, TOPBP1, TF, RNU6-428P, PLSCR5-AS1, NME9, RNU6-505P, RPL21P71, ZIC4-AS1, NPM1P28, GK5, SRPRB, HNRNPA1P20, RPL38P1, HMGB1P30, UBQLN4P1, HLTF-AS1, MED28P2, CPHL1P, MRAS, IQCJ-SCHIP1, RAB6B, TM4SF1-AS1, RNU6-1098P, WWTR1-IT1, WWTR1-AS1, RNU6-507P, RNU6-720P, NPM1P29, HNRNPA1P24, IQCJ, XRN1, RPL32P9, C3orf36, SLC02A1, SIAH2-AS1, CLRN1-AS1, ESYT3, SCHIP1, RYK, RNA5SP145, SETP11, CEP70, IL12A, LINC01100, C3orf80, IFT80, AMOTL2, ATR, FAIM, PIK3CB, SMC4, PLS1, MRPL42P6, MIR5186, MBNL1-AS1, ATP5L5, HMGN2P13, RN7SL300P, RNU6-901P, RPL21P42, ARHGEF26-AS1, DDX50P2, RPL9P15, MME-AS1, PABCP1P10, TRIM59, PLCH1-AS1, PLCH1-AS2, ZNF146, RNU6-1284P, RNY4P4, HMGN1P10, RNU7-198P, RNU6-789P, RSRRC1, CNKAB1-AS1, TIPARP-AS1, TRPC1, METTL15P1, LINC00886, PA2G4P4, KLF3P2, PCOLCE2, RN7SKP177, LINC00880, LINC00881, KRT18P34, RNA5SP146, RN7SKP46, MTAPP1, PAQR9, GPR79, MIR3919, IQCJ-SCHIP1-AS1, U2SURP, RNU2-31P, IL12A-AS1, BRD7P2, MIR15B, MIR16-2, RNU7-136P, SCARNA7, KRT8P12, RPL6P8, CHST2, PLSC9A, C3orf58, PLOC4, PLSCR2, PLSCR1, PLSCR5, ZIC4, ZIC1, AGTR1, CPB1, CPA3, YG1, HLT, HPS3, CP, TM4SF18, TM4SF1, TM4SF4, WWTR1, COMMD2, ANKUB1, RN1F13, PFN2, TSC22D2, SERP1, EIF2A, FAM194A, SIAH2, FAM188B2, CLRN1, MED12L, GPR171, P2RY14, GPR87, P2RY13, P2RY12, IGSF10, AADACL2, AADAC, SUCNR1, MBNL1, TMEM14E, P2RY1, RAP2B, C3orf79, ARHGEF26, DHX36, GPR149, MME, PLCH1, C3orf33, SLC33A1                                                                                                                                                                                                                                                                                                                                                                                                                                                                                                                                                                                                                                                                                                                    |
| chr4  | 86860     | 1824786   | M14    | ZNF595, ZNF732, ZNF141, ZNF721, PIGG, PDE6B, ATP5I, MYL5, MFSD7, PCGF3, CPLX1, GAK, TMEM1175, DGKQ, SLC26A1, IDUA, FGFR1L, RNF212, SPON2, CTBP1, MAEA, UVSSA, CRIPAK, NKX1-1, FAM53A, SLBP, TMEM129, TACC3, FGFR3, LETM1, ZNF718, ZNF876P, MIR571, ABCA11P1, RN7SL358P, TMED11P, CTBP1-AS2                                                                                                                                                                                                                                                                                                                                                                                                                                                                                                                                                                                                                                                                                                                                                                                                                                                                                                                                                                                                                                                                                                                                                                                                                                                                                                                                                                                                                                                                                                                                                                                                                                                                                                                                                                                                                                                                                                                                                                                                                                                                                                                                                                                                                                                                                                                                                                                                                                                                                                                                                                                                                                                                                                                                                                                                                                                                                                                                                                                                                                                                                                                                                                                                                                                                                                                                                                                                                                                                                                                                                                                                                                                                                                                                                                                                                                                                                                                                                                                                                                                                                                                                                                                                                                                                                                                                                                                                                                                                                                                                                                                                                                                                  |
| chr4  | 69176105  | 69879871  | M4     | MT2P1, UGT2B29P, YTHDC1, TMPRSS11E, UGT2B17, UGT2B15, UGT2B10, UGT2A3                                                                                                                                                                                                                                                                                                                                                                                                                                                                                                                                                                                                                                                                                                                                                                                                                                                                                                                                                                                                                                                                                                                                                                                                                                                                                                                                                                                                                                                                                                                                                                                                                                                                                                                                                                                                                                                                                                                                                                                                                                                                                                                                                                                                                                                                                                                                                                                                                                                                                                                                                                                                                                                                                                                                                                                                                                                                                                                                                                                                                                                                                                                                                                                                                                                                                                                                                                                                                                                                                                                                                                                                                                                                                                                                                                                                                                                                                                                                                                                                                                                                                                                                                                                                                                                                                                                                                                                                                                                                                                                                                                                                                                                                                                                                                                                                                                                                                       |

|      |           |           |                              |                                                                                                                                                                                                                                                                                                                                                                                                                                                                                                                                                                                                                                                                                                                                                                                                                                                                                                                                                                                                                                                                                                                                                                                                                                                                                                                       |
|------|-----------|-----------|------------------------------|-----------------------------------------------------------------------------------------------------------------------------------------------------------------------------------------------------------------------------------------------------------------------------------------------------------------------------------------------------------------------------------------------------------------------------------------------------------------------------------------------------------------------------------------------------------------------------------------------------------------------------------------------------------------------------------------------------------------------------------------------------------------------------------------------------------------------------------------------------------------------------------------------------------------------------------------------------------------------------------------------------------------------------------------------------------------------------------------------------------------------------------------------------------------------------------------------------------------------------------------------------------------------------------------------------------------------|
| chr4 | 109097266 | 113739329 | M14                          | LEF1-AS1, RPSAP34, EXOC7P1, RPL34-AS1, RNU6-431P, RCC2P8, RBMPX4, SEC24B-AS1, RN7SL55P, MIR576, SETP20, CDC42P4, HIGD1AP14, KRT19P3, RNU6-35P, RN7SL275P, HSBP1P2, RNU6-205P, ZBED1P1, RPL7L1P13, ZNF969P, MIR297, LYPLA1P2, RNU6-289P, CCDC34P1, TUBB8P3, RTL1P1, TOX4P1, MIR302B, MIR367, MIR302A, MIR302C, OSTCP4, WRBP1, RPL7AP30, RPL34, OSTC, ETNPPL, COL25A1, SEC24B, CCDC109B, CASP6, PLA2G12A, CFI, GAR1, RRR, LRIT3, EGF, ELOVL6, ENPEP, PITX2, C4orf32, AP1AR, TIFA, ALPK1, NEUROG2, C4orf21, LARP7, ANK2                                                                                                                                                                                                                                                                                                                                                                                                                                                                                                                                                                                                                                                                                                                                                                                                  |
| chr4 | 189020188 | 190948412 | M4                           | RNU6-173P, NARG2P1, LINC01060, RNU7-192P, HSP90AA4P, RNU1-51P, MLLT10P2, TUBB7P, RNA5SP174, RNA5SP175, DUX4L9, TRIML2, TRIML1, FRG1, FRG2                                                                                                                                                                                                                                                                                                                                                                                                                                                                                                                                                                                                                                                                                                                                                                                                                                                                                                                                                                                                                                                                                                                                                                             |
| chr5 | 14871460  | 31423051  | M2                           | BASP1, CDH18, CDH12, PRDM9, C5orf17, CDH10, CDH9, CDH6, DROSHA, UQCRRP3, HNRNPKP5, SEPH5ZP1, MARK2P5, MIR887, RNA5SP178, NACAP6, RNA5SP179, RNU6-660P, RNA5SP180, DCAF13P2, RNU6-1003P, RN7SKP133, FTH1P10, RPL36AP21, RN7SL58P, UBE2V1P12, RPL32P14, HSPD1P15, GUSBP1, HSPD1P1, PMCHL1, GCNT1P2, RN7SL572P, RNU6-374P, MSNP1, RNU4-43P, RNU6-738P, LINC01021, RNU6-909P, LSP1P3, SUCLG2P4, UBL5P1, RN7SKP207, RPL19P11, ANKH, FBXL7, MARCH11, ZNF622, FAM134B, MYO10                                                                                                                                                                                                                                                                                                                                                                                                                                                                                                                                                                                                                                                                                                                                                                                                                                                 |
| chr5 | 68463734  | 68805646  | M16                          | CFL1P5, CHCHD2P2, RN7SL476P, RPS27P14, RN7SL616P, GUSBP3, CCN21, CENPH, MRPS36, CDK7, CCDC125, TAF9, RAD17, MARVELD2, OCLN                                                                                                                                                                                                                                                                                                                                                                                                                                                                                                                                                                                                                                                                                                                                                                                                                                                                                                                                                                                                                                                                                                                                                                                            |
| chr5 | 133914186 | 134223872 | M16                          | RNU6-1311P, RNU6-1164P, RNU6-757P, JADE2, SAR1B, SEC24A, CAMLG, DDX46, C5orf24, TXNDC15                                                                                                                                                                                                                                                                                                                                                                                                                                                                                                                                                                                                                                                                                                                                                                                                                                                                                                                                                                                                                                                                                                                                                                                                                               |
| chr5 | 140033522 | 140951607 | M1                           | PCDHGC5, DIAPH1, VTRNA1-1, VTRNA1-2, VTRNA1-3, PCDHA14, PCDHB9, PCDHB18, PCDHB19P, PCDHGB8P, RN7SL68P, IK, WDR55, DND1, HARS, HARS2, ZMAT2, PCDHA1, PCDHA2, PCDHA3, PCDHA4, PCDHA5, PCDHA6, PCDHA7, PCDHA8, PCDHA9, PCDHA10, PCDHA11, PCDHA12, PCDHA13, PCDHAC1, PCDHAC2, PCDHB1, PCDHB2, PCDHB3, PCDHB4, PCDHB5, PCDHB6, PCDHB7, PCDHB8, PCDHB16, PCDHB10, PCDHB11, PCDHB12, PCDHB13, PCDHB14, PCDHB15, SLC25A2, TAF7, PCDHGA1, PCDHGA2, PCDHGA3, PCDHGB1, PCDHGA4, PCDHGB2, PCDHGA5, PCDHGB3, PCDHGA6, PCDHGA7, PCDHGB4, PCDHGA8, PCDHGA9, PCDHGB6, PCDHGA10, PCDHGB7, PCDHGA11, PCDHGA12, PCDHGC3, PCDHGC4                                                                                                                                                                                                                                                                                                                                                                                                                                                                                                                                                                                                                                                                                                         |
| chr6 | 28478527  | 28499554  | M4                           | GPX6, GPX5                                                                                                                                                                                                                                                                                                                                                                                                                                                                                                                                                                                                                                                                                                                                                                                                                                                                                                                                                                                                                                                                                                                                                                                                                                                                                                            |
| chr6 | 28499554  | 28500097  | M1, M4                       | GPX5                                                                                                                                                                                                                                                                                                                                                                                                                                                                                                                                                                                                                                                                                                                                                                                                                                                                                                                                                                                                                                                                                                                                                                                                                                                                                                                  |
| chr6 | 28500097  | 28547048  | M1, M2, M4                   | GPX5, SCAND3                                                                                                                                                                                                                                                                                                                                                                                                                                                                                                                                                                                                                                                                                                                                                                                                                                                                                                                                                                                                                                                                                                                                                                                                                                                                                                          |
| chr6 | 28547048  | 28870779  | M1, M16, M2, M4, M8          | LINC00533, RPSAP2, RPL13P, ZNF90P2, HCG14, SCAND3, TRIM27                                                                                                                                                                                                                                                                                                                                                                                                                                                                                                                                                                                                                                                                                                                                                                                                                                                                                                                                                                                                                                                                                                                                                                                                                                                             |
| chr6 | 28870779  | 31322941  | M1, M16, M17, M2, M4, M8     | RNU6-930P, KRT18P1, RN7SL471P, HCG15, HCG16, OR2AD1P, OR2P1P, OR2N1P, OR2J4P, OR2H4P, OR2G1P, OR2U1P, OR2U2P, OR2B4P, DDX6P1, UBDP1, MAS1LP1, RPS17P1, LINC01015, GPR53P, OR21P, OR2H5P, TMEM183AP1, SNORD32B, RPL13AP, SUMO2P1, ZDHHC20P1, HCG4P11, HLA-F-AS1, RPL23AP1, MICE, HCG9P5, IFITM4P, HLA-V, HCG4, HLA-P, RPL7AP7, MICG, HCG4P8, MICF, HCG4P7, HLA-H, HLA-T, DDX39BP1, MCCD1P1, HCG4B, HLA-K, HLA-U, HCG4P5, HLA-W, MICE, HCG9, DDX39BP2, MCCD1P2, ZNRD1-AS1, HCG4P3, HLA-J, ETF1P1, TRIM31-AS1, PAIP1P1, HCG17, TRIM26BP, HLA-L, HCG18, HLA-N, HCG19P, UBQLN1P1, MICC, TMPOP1, SUCLA2P1, RANP1, MIR877, PTMAP1, RPL7P4, MDC1-AS1, RN7SL353P, HCG20, LINC00243, RN7SKP186, DDR1-AS1, MIR4640, RN7SL175P, HCG21, HCG22, RNU6-1133P, POLR2LP, PSORS1C3, USP8P1, RPL3P2, WASF5P, TRIM27, C6orf100, ZNF311, OR2W1, OR2B3, OR2J1, OR2J3, OR2J2, OR14J1, OR5V1, OR12D3, OR12D2, OR12D1, OR11A1, OR10C1, OR2H1, MAS1L, UBD, GABBR1, OR2H2, MOG, ZFP57, HLA-F, HLA-G, HLA-A, ZNRD1, PPP1R11, RN3F9, TRIM31, TRIM40, TRIM10, TRIM15, TRIM26, TRIM39, TRIM39-RPP21, RPP21, HLA-E, GNLI, PRR3, ABCF1, PPP1R10, MRPS18B, ATAT1, C6orf136, DHX16, PPP1R18, NRM, MDC1, TUBB, FLOT1, IER3, DDR1, GTF2H4, VARS2, SFTA2, DPCR1, MUC21, MUC22, C6orf15, PSORS1C1, CDSN, PSORS1C2, CCHCR1, TCF19, POU5F1, HCG27, HLA-C, HLA-B |
| chr6 | 31322941  | 31324925  | M1, M16, M17, M2, M4, M6, M8 | HLA-B                                                                                                                                                                                                                                                                                                                                                                                                                                                                                                                                                                                                                                                                                                                                                                                                                                                                                                                                                                                                                                                                                                                                                                                                                                                                                                                 |
| chr6 | 31324925  | 31918549  | M1, M16, M17, M2, M4, M8     | LY6G5B, LY6G5C, ABHD16A, DHFRP2, RNU6-283P, FGFR3P1, ZDHHC20P2, HLA-S, HCP5, LINC01149, PPIAP9, RPL15P4, SNORD117, SNORD84, DDX39B-AS1, UQCRRHP1, SNORA38, C6orf47-AS1, MIR4646, RNU6-850P, SAPCD1-AS1, SNORD48, SNORD52, EHMT2-AS1, LY6G6F, LY6G6E, LY6G6D, C6orf25, LY6G6C, DDAH2, CLIC1, MSH5, MSH5-SAPCD1, SAPCD1, VWA7, VARS, LSM2, HSPA1L, HSPA1A, HSPA1B, C6orf48, NEU1, SLC44A4, EHMT2, C2, ZBTB12, CFB, HLA-B, MICA, MICB, MCCD1, ATP6V1G2-DDX39B, DDX39B, ATP6V1G2, NFKBIL1, LTA, TNF, LTB, LST1, NCR3, AIF1, PRRC2A, BAG6, APOM, C6orf47, GPANK1, CSNK2B                                                                                                                                                                                                                                                                                                                                                                                                                                                                                                                                                                                                                                                                                                                                                   |
| chr6 | 31918549  | 31919860  | M1, M16, M17, M4, M8         | CFB                                                                                                                                                                                                                                                                                                                                                                                                                                                                                                                                                                                                                                                                                                                                                                                                                                                                                                                                                                                                                                                                                                                                                                                                                                                                                                                   |
| chr6 | 31919860  | 31919864  | M1, M17, M4, M8              | CFB, NLF                                                                                                                                                                                                                                                                                                                                                                                                                                                                                                                                                                                                                                                                                                                                                                                                                                                                                                                                                                                                                                                                                                                                                                                                                                                                                                              |
| chr6 | 31919864  | 31922219  | M1, M16, M17, M4, M8         | NLF                                                                                                                                                                                                                                                                                                                                                                                                                                                                                                                                                                                                                                                                                                                                                                                                                                                                                                                                                                                                                                                                                                                                                                                                                                                                                                                   |
| chr6 | 31922219  | 31922995  | M1, M16, M4, M8              | NLF                                                                                                                                                                                                                                                                                                                                                                                                                                                                                                                                                                                                                                                                                                                                                                                                                                                                                                                                                                                                                                                                                                                                                                                                                                                                                                                   |
| chr6 | 31922995  | 32339656  | M1, M16, M17, M4, M8         | MIR1236, C4A-AS1, CYP21A1P, TNXA, STK19P, C4B-AS1, RNA5SP206, HNRNPA1P2, RNU6-603P, NLF, SKIV2L, DXO, STK19, C4A, C4B, CYP21A2, TNXB, ATF6B, FKBPL, PRRT1, PPT2, PPT2-EGFL8, EGFL8, AGPAT1, RN5, AGER, PBX2, GSPM3, NOTCH4, C6orf10                                                                                                                                                                                                                                                                                                                                                                                                                                                                                                                                                                                                                                                                                                                                                                                                                                                                                                                                                                                                                                                                                   |
| chr6 | 32339656  | 32412821  | M16, M17, M4, M8             | HCG23, C6orf10, BTNL2, HLA-DRA                                                                                                                                                                                                                                                                                                                                                                                                                                                                                                                                                                                                                                                                                                                                                                                                                                                                                                                                                                                                                                                                                                                                                                                                                                                                                        |
| chr6 | 32412821  | 32712935  | M17, M4, M8                  | HLA-DRB9, RNU1-61P, HLA-DRB6, HLA-DQB1-AS1, MTCO3P1, HLA-DQB3, HLA-DRA, HLA-DRB5, HLA-DRB1, HLA-DQA1, HLA-DQB1, HLA-DQA2                                                                                                                                                                                                                                                                                                                                                                                                                                                                                                                                                                                                                                                                                                                                                                                                                                                                                                                                                                                                                                                                                                                                                                                              |
| chr6 | 32712935  | 33374263  | M16, M17, M4, M8             | HSD17B8, RING1, VPS52, MIR3135B, TAPSAR1, PPP1R2P1, HLA-Z, BRD2-IT1, RPL32P1, HLA-DPA2, COL11A2P1, HLA-DPB2, HLA-DPA3, HCG24, RNY4P10, MIR219-1, ZNF70P1, HCG25, MYL8P, LYPLA2P1, RPL35AP4, RPL12P1, RPS18, B3GALT4, WDR46, PFDN6, RGL2, TAPBP, ZBTB22, DAXX, KIFC1, HLA-DQA2, HLA-DQB2, HLA-DOB, TAP2, PSMB8, PSMB9, TAP1, HLA-DMB, HLA-DMA, BRD2, HLA-DOA, HLA-DPA1, HLA-DPB1, COL11A2, RXRB, SLC39A7                                                                                                                                                                                                                                                                                                                                                                                                                                                                                                                                                                                                                                                                                                                                                                                                                                                                                                               |
| chr6 | 33374263  | 33409536  | M16, M17, M4                 | MIR5004, KIFC1, PHF1, CUTA, SYNGAP1                                                                                                                                                                                                                                                                                                                                                                                                                                                                                                                                                                                                                                                                                                                                                                                                                                                                                                                                                                                                                                                                                                                                                                                                                                                                                   |
| chr6 | 33409536  | 33425318  | M16, M4                      | SYNGAP1, ZBTB9                                                                                                                                                                                                                                                                                                                                                                                                                                                                                                                                                                                                                                                                                                                                                                                                                                                                                                                                                                                                                                                                                                                                                                                                                                                                                                        |
| chr6 | 33425318  | 33541991  | M16                          | RN7SL26P, ZBTB9, BAK1                                                                                                                                                                                                                                                                                                                                                                                                                                                                                                                                                                                                                                                                                                                                                                                                                                                                                                                                                                                                                                                                                                                                                                                                                                                                                                 |
| chr6 | 73713630  | 73879522  | M2                           | PGAM1P10, KCNQ5-AS1, KCNQ5                                                                                                                                                                                                                                                                                                                                                                                                                                                                                                                                                                                                                                                                                                                                                                                                                                                                                                                                                                                                                                                                                                                                                                                                                                                                                            |
| chr6 | 73879522  | 74520819  | M14, M2                      | KHDC1P1, RPSAP41, EIF3EP1, SDCBP2P1, PAICSP3, OOE-AS1, RPL39P3, RPS6P8, RNU6-975P, RPS27P15, SLC17A5, CD109, KCNQ5, KHDC1L, KHDC1, DPPA5, KHDC3L, OOE, DDX43, MB21D1, MTO1, EEF1A1                                                                                                                                                                                                                                                                                                                                                                                                                                                                                                                                                                                                                                                                                                                                                                                                                                                                                                                                                                                                                                                                                                                                    |
| chr6 | 74520819  | 75875222  | M14                          | TXNP7, CD109, COL12A1                                                                                                                                                                                                                                                                                                                                                                                                                                                                                                                                                                                                                                                                                                                                                                                                                                                                                                                                                                                                                                                                                                                                                                                                                                                                                                 |
| chr6 | 75875222  | 75953432  | M14, M2                      | COL12A1, COX7A2                                                                                                                                                                                                                                                                                                                                                                                                                                                                                                                                                                                                                                                                                                                                                                                                                                                                                                                                                                                                                                                                                                                                                                                                                                                                                                       |
| chr6 | 75953432  | 88776224  | M14, M2, M9                  | HMG8P139, MIR4463, RNU1-34P, RPL26P20, RNU6-1338P, RNU6-1016P, RN7SKP163, RNU6-155P, RNA5SP209, RNU6-248P, RNU6-261P, RPS6P7, HMGN3-AS1, DBIP1, GAPDHP63, RPL35AP18, AK4P5, RPL17P25, RNA5SP210, RNU6-130P, LAP3P1, SMARCE1P2, KRT18P64, DUTP5, TPT1P6, PKMP3, SNHG5, SMIM11P1, RNU4-72P, RNU4-12P, RPL7P27, NDUFA5P9, RN7SL643P, RPL7P29, MTHFD2P2, RN7SKP209, RCN1P1, HSPD1P10, ST13P16, RNU6-444P, RN7SL183P, COX7A2, TMEM30A, FILIP1, SENP6, MYO6, IMPG1, HTR1B, MEI4, IRAK1BP1, PHIP, HMGN3, LCA5, SH3BGR2, ELOVL4, TTK, BCKDHB, FAM46A, IBTK, TPBG, UBE3D, DOPEY1, PGM3, RWDD2A, ME1, PRSS35, SNAP91, RIPPLY2, CYB5R4, MRAP2, KIAA1009, TBX18, NT5E, SNX14, SYNCRIP, HTR1E, CGA, ZNF292, GJB7, SMIM8, C6orf163, C6orf164, C6orf165, SLC35A1, RARS2, ORC3, AKIRIN2, SPACA1                                                                                                                                                                                                                                                                                                                                                                                                                                                                                                                                       |
| chr6 | 88776224  | 111067328 | M2, M9                       | RN7SL617P, RNU6-957P, PNIS, USP45, CCNC, ACTBP8, RNU2-61P, RN7SL336P, TUBB3P1, NACAP7, RN7SL11P, DNAJC19P6, CASP8AP2, RN7SKP110, MIR4464, MIR4643, CASC6, RN7SL415P, RPL5P19, ATF1P1, COPSSP1, CYCSP17, MANEA-AS1, KRT18P50, RN7SL797P, UFL1-AS1, RPS7P8, RNU4-70P, EEF1G6, RN7SL509P, MIR2113, EIF4EBP2P3, MIR548A1, BDH2P1, TSTD3, MCHR2-AS1, NPM1P38, PRDX2P4, R3HD2P2, NPM1P10, RNU6-897P, LINC00577, RNU6-1106P, BVES-AS1, RPL35P3, RN7SKP211, RN7SL47P, RNU6-344P, RNA5SP211, RNU6-527P, RPL21P65, RNU6-117P, MIR587, RNU6-1299P, RPS24P12, RNU6-437P, RPL23AP50, MTHFD2P3, RPL3P7, OSTM1-AS1, RNA5SP212, RNU6-1144P, RNU6-770P, SUMO2P8, LINC00222, ZNF259P1, ARMC2-AS1, RNU6-653P, PTCHD3P3, CCDC162P, RPL7P28, PRDM13, MCHR2, SIM1, ASCC3, GRIK2, HACE1, LIN28B, BVES, POPDC3, PREP, PRDM1, ATG5, AIM1, RTN4P1, QRSL1, C6orf203, BEND3, PDSS2, SOBP, SCML4, SEC63, OSTM1, NR2E1, SNX3, LACE1, FOXO3, ARMC2, SESN1, CEP57L1, C6orf183, CD164, PPIL6, SMPD2, MICAL1, ZBTB24, AK9, FIG4, GPR6, WASF1, CDC40, METTL24, DDO, SLC22A16, CDK19, SPACA1, CNR1, RNGT7, PNRC1, SRSF12, PM20D2, GABRR1, GABRR2, UBE2J1, RRAAGD, ANKRD6, LYRM2, MDN1, GJA10, BACH2, MAP3K7, EPHA7, MAMMA, FUT9, UFL1, FHL5, GPR63, NDUFAF4, KLHL32, MMS22L, POU3F2, FBXL4, FAXC, COQ3                                                    |
| chr6 | 111067328 | 111672994 | M16, M2, M9                  | RNU6-1115P, CNN2P9, RNU6-906P, GSTM2P1, RNU6-960P, CDK19, AMD1, GTF3C6, RPF2, SLC16A10, KIAA1919, REV3L                                                                                                                                                                                                                                                                                                                                                                                                                                                                                                                                                                                                                                                                                                                                                                                                                                                                                                                                                                                                                                                                                                                                                                                                               |

|      |           |           |           |                                                                                                                                                                                                                                                                                                                                                                                                                                                                                                                                                                                                                                                                                                                                                                                                                                                                                                                                                                                                                                                                                                                                                                                                                                                                                                                                                                                                                                                                                                                                                                                                                                                                                                                                                                                                                                                                                                                                                                                                                                                                                                                                                                                                                                                                                                                                                                             |
|------|-----------|-----------|-----------|-----------------------------------------------------------------------------------------------------------------------------------------------------------------------------------------------------------------------------------------------------------------------------------------------------------------------------------------------------------------------------------------------------------------------------------------------------------------------------------------------------------------------------------------------------------------------------------------------------------------------------------------------------------------------------------------------------------------------------------------------------------------------------------------------------------------------------------------------------------------------------------------------------------------------------------------------------------------------------------------------------------------------------------------------------------------------------------------------------------------------------------------------------------------------------------------------------------------------------------------------------------------------------------------------------------------------------------------------------------------------------------------------------------------------------------------------------------------------------------------------------------------------------------------------------------------------------------------------------------------------------------------------------------------------------------------------------------------------------------------------------------------------------------------------------------------------------------------------------------------------------------------------------------------------------------------------------------------------------------------------------------------------------------------------------------------------------------------------------------------------------------------------------------------------------------------------------------------------------------------------------------------------------------------------------------------------------------------------------------------------------|
| chr6 | 111672994 | 147707278 | M2,M9     | ALDH8A1, GRM1, IL22RA2, FCF1P5, REV3L-IT1, BRD7P4, TRAF3IP2-AS1, RNU6-1226P, KRT18P65, FEM1AP3, RNU6-1163P, FCF1P10, SOCS5P5, IFNGR1, NUDT19P3, RPSAP43, RNA5SP213, DNAJA1P4, RNU6-475P, TP1P3, NIP7P3, RAB32, CBX3P9, KRT18P22, RPS29P13, RNA5SP214, RN75KP18, RNTSKP18, RNU6-253P, NEPNP, BRD7P3, SSXP10, MIR548B, ADGB, RNU6-194P, MIR3144, RNU6-214P, RNA5SP215, COX6A1P3, RNU6-1286P, RNU4-35P, RNU4-76P, RNU2-8P, SLC25A5P7, HMG83P18, RNU1-18P, RN7SL564P, ATP5LP2, NCOA7-AS1, RN75KP56, RNA5SP216, PPP1R14BP5, MIR588, RNU6-200P, VIMP1, PRELID1P1, RPS4XP9, RNA5SP217, OLIG3, YWHAZP4, PDE7B, RPL5P18, TNFAIP3, EEF1DP5, MESTP1, BMPR1AP51, RNU6-861P, RPL5P21, RPL2IP67, HBS1L, RNU4-18P, MIR548H5, RN7SKP245, MIR548A1, LINC01013, HIVEP2, EEF1A1P36, RPL2IP66, TAAR7P, TAAR4P, TAAR3, HLF1P1, CCNG1P1, SNORD100, SNORA33, HMG81P13, MTFR2, RPL23AP46, LINC00326, MTCYBP4, HSEI1P21, FTH1P26, HMGAI1P7, RN7SL408P, RNA5SP218, KRT8P42, CHCHD2P4, LINC01010, PERP, FAMA86P, STXB8P5, MYB-AS1, MIR548A2, LINC00271, KIAA1244, GAPDH7P3, HMG81P17, COX5BP2, NDU55P1, RNA5SP219, AIG1, RPL35AP3, BTF3L4P3, BCLAF1, RPSAP42, MARCKSL1P2, MIR3145, RNU6-427P, PBVO1, ATP5F1P6, HEBP2, RNA5SP220, RPS3668, MIR4465, RPS3AP24, RN7SKP106, RPS3AP23, NUBF8P2, RNA5SP221, VDAC1P8, MRPL42P3, TPT1P4, RNU1-33P, NBSL1, FUNDC2P3, RNA5SP222, RNU6-734P, KATNBL1P6, STXB8P5-AS1, ADAT2, CCDC28A, PEX3, ECT2L, MAP7, REPS1, FUCA2, MAP3K5, PHACTR2, PEX7, ABRACL, HECA, TXLNB, SLC35D3, IL20RA, CITED2, NMBR, GJE1, LTV1, VTA1, ZC2HC1B, GPR126, PLAGL1, SF3B5, STX11, UTRN, MYB, EPM2A, FBXO30, SHPRH, AH1, REV3L, TRAF3IP2, FYN, WISP3, TUBE1, FAM229B, LAMA4, RFPL4B, MARCKS, HDAC2, HS3ST5, FRK, NT5DC1, COL10A1, TSPYL4, DSE, TSPYL1, FAM26F, TRAPP3C, FAM26E, FAM26D, RWDD1, RSPH4A, ZUFSP, KPNA5, FAM162B, GPRC6A, RFX6, VGLL2, ROS1, GOPC, DCBLD1, NUS1, SLC35F1, CEP85L, PLN, MCM9, ASF1A, FAM184A, MAN1A1, TBC1D32, GJA1, HSF2, SERINC1, PKIB, FABP7, SMPDL3A, CLVS2, TRDN, NKAIN2, RNF217, TP052L1, HDDC2, HEY2, NCOA7, HINT3, TRMT11, CENPW, RSP03, RNF146, ECHDC1, SOGA3, KIAA0408, C6orf58, THEMIS, PTPRK, LAMA2, ARHGAP18, TMEM244, L3MBTL3, SAMD3, TMEM200A, SMLR1, EPB41L2, AKAP7, ARG1, MED23, ENPP3, OR2A4, CTAGE9, ENPP1, CTGF, MOXD1, STX7, TAAR9, TAAR8, TAAR6, TAAR5, TAAR2, TAAR1, VNN1, VNN3, VNN2, SLC18B1, RPS12, EYA4, TCF21, TBPL1, SLC2A12, SGK1 |
| chr6 | 147707278 | 160461673 | M14,M2,M9 | PCMT1, TIAM2, LRP11, RAET1E, RAET1G, TFB1M, ULBP2, ULBP1, CLDN20, NOX3, RAET1L, ULBP3, PPP1R14C, ARID1B, IYD, MYCT1, VIP, YAP1P1, FBXO5, RNU6-1222P, CYP51A1P3, TMEM242, SNRPEP6, PLEKHG1, RN7SL234P, FABP12P1, RNU7-3P, RPS18P9, SAMD5, CCT7P1, RAET1E-AS1, ZDHHC14, BTF3P10, RAET1K, MTRF1L, RAET1M, SASH1, PHB1P, RNU4-7P, SSR1P1, PDCL3P5, RNU6-302P, RNU6-300P, RNU6-1247P, RNY4P20, RN7SKP268, HSPA8P15, RNU6-813P, SYNE1-AS1, RNA5SP223, HSPD1P16, TUBB4BP7, RNA5SP224, RNA5SP225, MTND4P13, RNU6-896P, HMG83P19, RPS4XP8, RNU6-824P, MIR1273C, RNU7-152P, MIR1202, MIR4466, LDHAL6P, MIR3692, SNX9, HSP61P26, RNU6-786P, SYNU2-IT1, SRP72P2, RN7SL173P, CACYBP3, TATDN2P2, AMZ2P2, MIR3918, EZR-AS1, RGS17, OSTCP1, MTHFD1L, RNU6-293P, FNDC1-IT1, HNRNP1P1, RNU4ATAC18P, SNORA20, SNORA29, UST, AIRN, OPRN1, TAB2, SYNJ2, SUMO4, ZC3H12D, IPECF1, PP1L4, CNKSR3, AKAP12, SERAC1, ZBTB2, RSCD1, GINM1, SCAF8, GTF2H5, TULP4, C6orf211, KATNA1, TMEM181, CCDC170, DYNL1, LAT51, SYTL3, ESR1, EZR, NUP43, C6orf99, RSPH3, TAGAP, FNDC1, SOD2, WTAP, ACAT2, TCP1, MRPL18, PNLD1, MAS1, IGF2R, SYNE1                                                                                                                                                                                                                                                                                                                                                                                                                                                                                                                                                                                                                                                                                                                                                                                                                                                                                                                                                                                                                                                                                                                                                                                                                                                                    |
| chr6 | 160461673 | 170893748 | M2,M9     | LPAL2, KRT8P44, CAHM, RN7SL366P, RNA5SP226, RNU6-730P, LINC00473, GAPDH7P2, RNU6-153P, GNG5P1, HNRNP1P49, RPS6KA2-IT1, MIR1913, FAM103A2P, RPS6KA2-AS1, MIR3939, HMLT4-AS1, KIF25-AS1, CTAGE13P, LINC00242, LINC00574, RPL12P23, MIR4644, IGF2R, SLC22A1, SLC22A2, SLC22A3, LPA, PLG, FAMP3A, AGPAT4, PARK2, PACRG, QKI, C6orf118, PDE10A, SDIM1, T, PRR18, SFT2D1, MPC1, RPS6KA2, RNASET2, FGFR1OP, CCR6, TCP10L2, GPR31, UNC93A, TLL2, TCP10, C6orf123, MLLT4, KIF25, MRP1, DAKT, SMOCC2, THBS2, WDR27, C6orf1120, PPF10, TCTE3, ERMARD, DLL1, FAM120B, PSMB1, TBP, PDCC2                                                                                                                                                                                                                                                                                                                                                                                                                                                                                                                                                                                                                                                                                                                                                                                                                                                                                                                                                                                                                                                                                                                                                                                                                                                                                                                                                                                                                                                                                                                                                                                                                                                                                                                                                                                                 |
| chr7 | 4839801   | 6852668   | M16       | RADIL, PAPOLB, MMD2, RBAK-RBAKD, RBAK, WIPI2, SLC29A4, TNRC18, FBXL18, ACTB, FSCN1, RNF216, OCM, CC21, RSPH10B, PMS2, AIMP2, EIF2AK1, ANKRD61, USP42, CYTH3, FAM220A, RAC1, DAGLB, KDELR2, GRID2IP, ZDHHC4, C7orf26, ZNF853, ZNF12, RSPH10B2, CCZ1B, RNF216P1, RBAKDN, OR10AH1P, ZNF890P, RNU6-215P, MIR589, RNF216-IT1, ZNF815P, RN7SL556P, RN7SL851P, RNU6-218P, ZNF316, PMS2CL                                                                                                                                                                                                                                                                                                                                                                                                                                                                                                                                                                                                                                                                                                                                                                                                                                                                                                                                                                                                                                                                                                                                                                                                                                                                                                                                                                                                                                                                                                                                                                                                                                                                                                                                                                                                                                                                                                                                                                                           |
| chr7 | 148581255 | 148975618 | M16,M17   | RN7SL569P, RNY5, RNY4, RNY3, RNY1, RNU6-650P, COX6B1P1, RN7SL521P, EZH2, PDIA4, ZNF786, ZNF425, ZNF398, ZNF282, ZNF212, ZNF783                                                                                                                                                                                                                                                                                                                                                                                                                                                                                                                                                                                                                                                                                                                                                                                                                                                                                                                                                                                                                                                                                                                                                                                                                                                                                                                                                                                                                                                                                                                                                                                                                                                                                                                                                                                                                                                                                                                                                                                                                                                                                                                                                                                                                                              |
| chr7 | 148975618 | 148990933 | M17       | ZNF783                                                                                                                                                                                                                                                                                                                                                                                                                                                                                                                                                                                                                                                                                                                                                                                                                                                                                                                                                                                                                                                                                                                                                                                                                                                                                                                                                                                                                                                                                                                                                                                                                                                                                                                                                                                                                                                                                                                                                                                                                                                                                                                                                                                                                                                                                                                                                                      |
| chr9 | 14725     | 14674184  | M14       | FOXD4, CBWD1, C9orf66, DOCK8, KANK1, DMRT1, DMRT3, DMRT2, SMARCA2, VLDLR, KCN2V, KIAA0020, RFX3, GLIS3, SLC1A1, SPATA6L, PPAPDC2, CDC37L1, AK3, RCL1, JAK2, INSL6, INSL4, RLN2, RLN1, PLGRKT, CD274, PDCC1L2, KIAA1432, ERMP1, KIAA2026, MLANA, RANBP6, IL33, TP052L3, UHRF2, C9orf38, GLDC, KDM4C, TMEM261, PTPRD, TYRP1, LURAP1L, MPDZ, NFIB, ZDHHC21, MIR1302-11, MIR1302-10, MIR1302-9, MIR1302-2, FAM138C, RN7SL412P, RNU6-1327P, RNU6-1073P, RPS27AP14, RNA5SP279, RNU2-25P, RN7SL592P, CARM1P1, GLIS3-AS1, RNU6-694P, MIR101-2, HNRNP1P41, MTDN6P5, MTDN1P11, MTND4P14, MTND5P14, IGHEP2, HMG2P31, AK4P4, MIR4665, RN7SL25P, RN7SL123P, RNF2P1, SNRPEP2, RPL4P5, RNU7-185P, RPS26P3, RN7SL5P, IMP3P1, RNU2-47P, RN7SL849P, TDPX2, LINC00583, PES1P2, RPL3P11                                                                                                                                                                                                                                                                                                                                                                                                                                                                                                                                                                                                                                                                                                                                                                                                                                                                                                                                                                                                                                                                                                                                                                                                                                                                                                                                                                                                                                                                                                                                                                                                         |
| chr9 | 14674184  | 21141387  | M14,M2    | ZDHHC21, CER1, FREM1, TTC3B9, SNAPC3, PSIP1, CCDC171, C9orf92, BNC2, CNTLN, SH3GL2, ADAMTSL1, FAM154A, RRAA, HAUS6, PLIN2, DENND4C, RPS6, ACER2, SLC24A2, MLLT3, FOCAD, PTPLAD2, IFNB1, IFNW1, RNU6-1280P, LDHAP4, RNU6-559P, RN7SL157P, RNU6-319P, RN7SL98P, FTH1P12, RNU6-246P, HMG2P16, RNU6-14P, RN7SL720P, PABPC1P11, MIR3152, RN7SKP258, SCARNA8, RNU6-264P, RN7SL158P, NDUFA5P3, MIR4473, RNU4-26P, MIR4474, MIR491, IFNNP1, IFNWP4                                                                                                                                                                                                                                                                                                                                                                                                                                                                                                                                                                                                                                                                                                                                                                                                                                                                                                                                                                                                                                                                                                                                                                                                                                                                                                                                                                                                                                                                                                                                                                                                                                                                                                                                                                                                                                                                                                                                  |
| chr9 | 21141387  | 21166147  | M2        | IFNW1, IFNA21                                                                                                                                                                                                                                                                                                                                                                                                                                                                                                                                                                                                                                                                                                                                                                                                                                                                                                                                                                                                                                                                                                                                                                                                                                                                                                                                                                                                                                                                                                                                                                                                                                                                                                                                                                                                                                                                                                                                                                                                                                                                                                                                                                                                                                                                                                                                                               |
| chr9 | 21166147  | 22008992  | M14,M2    | IFNA21, IFNA4, IFNA7, IFNA10, IFNA16, IFNA17, IFNA14, IFNA5, KLHL9, IFNA6, IFNA13, IFNA2, IFNA8, IFNA1, IFNE, MTAP, C9orf53, CDKN2A, CDKN2B, IFNWP15, IFNWP9, IFNWP18, IFNWP5, IFNA22P, IFNA20P, IFNA11P, IFNA12P, IFNWP2, IFNWP19, MIR31HG, MIR31, KHSRPP1, RN7SL151P, TUBB8P1, CDKN2B-AS1                                                                                                                                                                                                                                                                                                                                                                                                                                                                                                                                                                                                                                                                                                                                                                                                                                                                                                                                                                                                                                                                                                                                                                                                                                                                                                                                                                                                                                                                                                                                                                                                                                                                                                                                                                                                                                                                                                                                                                                                                                                                                 |
| chr9 | 22008992  | 22029512  | M2        | CDKN2B, CDKN2B-AS1, UBA52P6                                                                                                                                                                                                                                                                                                                                                                                                                                                                                                                                                                                                                                                                                                                                                                                                                                                                                                                                                                                                                                                                                                                                                                                                                                                                                                                                                                                                                                                                                                                                                                                                                                                                                                                                                                                                                                                                                                                                                                                                                                                                                                                                                                                                                                                                                                                                                 |
| chr9 | 22029512  | 36058860  | M14,M2    | SERPINH1P1, RN7SKP24, CNTFR-AS1, FAM205B, FAM205CP, GLULP4, YWHAZP6, SYF2P2, RN7SL338P, ATP8B5P, ZFAND6P1, RPL36AP33, MIR4667, RMRP, RN7SL22P, OR13E1P, NDUFA5P4, LINC00961, PGAM1P2, YBX1P10, OR13C6P, OR2S1P, OR2AM1P, DMRTA1, ELAVL2, IZUMO3, TUSC1, CAAP1, PLAA, IFT74, LRRC19, TEK, EQTN, MOB3B, IFNK, C9orf72, LINGO2, ACO1, DD58, TOPORS, NDUFB6, GVQW1, TAF1L, TMEM215, APTX, DNAJA1, SMU1, B4GALT1, SPINK4, BAG1, CHMP5, NFX1, AQP7, AQP3, NOL6, ANKRD18B, TRBV20OR9-2, TRBV21OR9-2, TRBV23OR9-2, PRSS3, UBE2R2, UBAP2, DCAF12, UBAP1, KIF24, NUDT2, KIAA1161, C9orf24, FAM219A, DNAI1, ENHO, CNTFR, RPP25L, DCTN3, ARID3C, SIGMAR1, GALT, IL11RA, CCL27, CCL19, CCL21, FAM205A, KIAA1045, DNAJB5, C9orf131, VCP, FANCG, PIGO, STOML2, FAM214B, UNC13B, RUSC2, FAM166B, TESK1, CD72, SIT1, CCDC107, ARHGFEF39, CA9, TPM2, TLN1, CREB3, GBA2, RGP1, MSMP, NPR2, SPAG8, HINT2, TMEM8B, FAM221B, OR13J1, HRC11, OR2S2, OR13C7P, RECK, CDKN2B-AS1, SUMO2P2, RMRPP5, RN7SKP120, RN7SL100P, RNA5SP280, LINC00032, CTAGE12P, RSN876, MIR873, RBMXP2, KRT18P66, KRT18P36, RPS26P2, FTLP4, HSPA8P17, SLC25A6P2, HMG83P23, RNA5SP281, SLC25A5P8, TOPORS-AS1, ASS1P12, TCEA1P4, RNU4ATAC15P, SNX18P7, CYP4F26P, PRSS3P4, ANXA2P2, TRBV22OR9-2, TRBV24OR9-2, TRBV25OR9-2, PTENP1, TRBV28OR9-2, TRBV29OR9-2, RNU4ATAC11P, SNORD121B, SNORD121A, OSTCP8, RNU7-38P, RN7SKP114, TUBB4BP2, RNA5SP282, RNU2-50P                                                                                                                                                                                                                                                                                                                                                                                                                                                                                                                                                                                                                                                                                                                                                                                                                                                                                                                                                                      |
| chr9 | 36058860  | 45728282  | M2        | RNU4-53P, HMG83P24, MIR4475, MIR4540, MIR4476, CHCHD4P3, RN7SL463P, RAB1C, RN7SKP171, PAICSP1, RNU7-124P, VN1R48P, FAM220BP, CYP4F33P, SNX18P3, FAM201A, RNU6-765P, VN2R3P, RN7SL640P, FAM74A5, ATP5A1P9, RN7SL462P, FAM74A1, VN2R4P, VN2R5P, RN7SL422P, FAM74A3, ATP5A1P1, FAM74A2, FAM74A6, ZNF658B, ATP5A1P8, RBPJP5, RN7SL763P, MEP1AP1, RNU6-1269P, SNX18P8, FAM95B1, CNN2P2, IGKV1OR9-2, MTND1P12, BMS1P14, AQP7P3, CYP4F59P, SNX18P4, RNU6-538P, MEP1AP3, ATP5A1P5, RN7SL343P, CNN2P4, CYP4F60P, SNX18P5, ANKRD20A7P, RNU6-599P, MEP1AP4, RBPJP6, ATP5A1P6, FAM27E4, CDK2AP2P1, MYO5BP1, RN7SL565P, RECK, GLIPR2, COIN, CLTA, GNE, RNF38, MELK, PAX5, ZCCHC7, GRHPR, ZBTB5, POLR1E, FBXO10, TOMM5, FRMPD1, TRMT10B, EXOSC3, DCAF10, SLC25A51, SHB, ALDH1B1, IGF1P1, ANKRD18A, CNTNAP3, SPATA31A1, SCAT1, SCAI, PPP6C, RAB3EK, HSPA5, SPATY31A, SPATA31A5, ANKRD20A2, CBWD7, FOXD4L2, ANKRD20A3, SPATA31A6, CNTNAP3B, FAM27C, FAM27A                                                                                                                                                                                                                                                                                                                                                                                                                                                                                                                                                                                                                                                                                                                                                                                                                                                                                                                                                                                                                                                                                                                                                                                                                                                                                                                                                                                                                                  |
| chr9 | 127074787 | 128230388 | M11       | NEK6, PSMB7, GPR144, NR5A1, NR6A1, OLFML2A, WDR38, RPL35, ARPC5L, GOLGA1, SCAI, PPP6C, RAB3EK, HSPA5, SPATY31A, MAPKAP1, RN7SL302P, MIR181A2HG, MIR181A2, MIR181B2, RNU4-82P, PRPS1P2, RNU6-1020P                                                                                                                                                                                                                                                                                                                                                                                                                                                                                                                                                                                                                                                                                                                                                                                                                                                                                                                                                                                                                                                                                                                                                                                                                                                                                                                                                                                                                                                                                                                                                                                                                                                                                                                                                                                                                                                                                                                                                                                                                                                                                                                                                                           |
| chr9 | 130119497 | 131046788 | M11       | GARNL3, SNORA65, MIR3911, MIR3960, RNA5SP296, MIR4672, SLC2A8, MIR199B, MIR3154, ZNF79, RPL12, LRSAM1, FAM129B, STXBP1, PTRH1, C9orf117, TTC16, TOR2A, SH2D3C, CDK9, FPGS, ENG, AK1, ST6GALNAC6, ST6GALNAC4, PIP5K1L, DPM2, FAM102A, NAI1, SLC25A25, PTGES2, LCN2, C9orf16, CIZ1, DNMI1, GOLGA2, SWI5                                                                                                                                                                                                                                                                                                                                                                                                                                                                                                                                                                                                                                                                                                                                                                                                                                                                                                                                                                                                                                                                                                                                                                                                                                                                                                                                                                                                                                                                                                                                                                                                                                                                                                                                                                                                                                                                                                                                                                                                                                                                       |
| chr9 | 131046788 | 131749996 | M11,M2    | TMSB4XP4, MIR219-2, ODF2-AS1, RNU7-171P, VTI1BP4, HMGAI1P4, RN7SL560P, SWI5, TRUB2, COQ4, SLC27A4, URM1, CERCAM, ODF2, GLE1, SPTAN1, WDR34, SET, PKN3, ZDHHC12, ZER1, TBC1D13, ENDOG, C9orf114, CCBL1, LRRC8A, PHYHD1, DOLK, NUP188                                                                                                                                                                                                                                                                                                                                                                                                                                                                                                                                                                                                                                                                                                                                                                                                                                                                                                                                                                                                                                                                                                                                                                                                                                                                                                                                                                                                                                                                                                                                                                                                                                                                                                                                                                                                                                                                                                                                                                                                                                                                                                                                         |
| chr9 | 131749996 | 134077104 | M11       | C9orf106, RN7SL159P, LINC00963, UBE2V1P4, RN7SL665P, RNU6-881P, NUP188, SH3GLB2, FAM73B, DOLP1, CRAT, PPP2R4, IER5L, NTMT1, C9orf50, ASB6, PRRX2, PTGES, TOR1B, TOR1A, C9orf78, USP20, FNBP1, GPR107, NCS1, HMCN2, ASS1, FUBP3, PRDM12, EXOSC2, ABL1, QRF, FBXC21, LAMC3, AIF1L, NUP214                                                                                                                                                                                                                                                                                                                                                                                                                                                                                                                                                                                                                                                                                                                                                                                                                                                                                                                                                                                                                                                                                                                                                                                                                                                                                                                                                                                                                                                                                                                                                                                                                                                                                                                                                                                                                                                                                                                                                                                                                                                                                     |
| chr9 | 139912424 | 140064491 | M17       | MIR3621, ABCA2, C9orf139, FUT7, NPDC1, ENTDP2, SAPCD2, UAP1L1, MAN1B1, DPP7, GRIN1, LRRC26                                                                                                                                                                                                                                                                                                                                                                                                                                                                                                                                                                                                                                                                                                                                                                                                                                                                                                                                                                                                                                                                                                                                                                                                                                                                                                                                                                                                                                                                                                                                                                                                                                                                                                                                                                                                                                                                                                                                                                                                                                                                                                                                                                                                                                                                                  |
| chrX | 192990    | 5811707   | M2        | PLCXD1, GTPBP6, PPP2R3B, SHOX, CRLF2, CSF2RA, IL3RA, SLC25A6, ASMTL, P2RY8, AKAP17A, ASMT, DHRSX, ZBED1, CD99, XG, GYG2, ARSD, ARSE, ARSH, ARSF, CXorf28, MXRA5, PRKX, NLGN4X, LINC00685, FABP5P13, KRT18P53, RPL14P5, MIR3690, RNA5SP498, RN7SL355P, LINC00106, ASMTL-AS1, DHRSX-IT1, CD99P1, LINC00102, GYG2-AS1, ARSD-AS1, RN7SL578P, ASS1P4, RNU6-114P, RNU6-146P, PRKX-AS1, MTND6P12                                                                                                                                                                                                                                                                                                                                                                                                                                                                                                                                                                                                                                                                                                                                                                                                                                                                                                                                                                                                                                                                                                                                                                                                                                                                                                                                                                                                                                                                                                                                                                                                                                                                                                                                                                                                                                                                                                                                                                                   |

|      |           |           |        |                                                                                                                                                                                                                                                                                                                                                                                                                                                                                                                                                                                                                                                                                                                                                                                                                                                                                                                                                                                                                                                                                                                                                                                                                                                                                                                                                                                                                                                                                                                                                                                                                                                                                                                                                                                                                                                                                                                                                                                                                                                                                                                                                                                                                                                                                                                                                                                                                                                                                                                                                                                                                                                                                                                                                                                                                                                                                                                                                                                                                                                                                                                                                                                                                                                                                                                                                                                                                                                                                                                                                                                                                                                                                                                                                                                                                                                                                                                                                                                                                                                                                                                                                                                                                                                                                                                                                                                                                                                                                                                                                                                                                                                                                                                                                                                                                                                                                                                                                                                                                                                                                                                                                                                                                                                                                                                                                                                                                                                                                                                  |
|------|-----------|-----------|--------|------------------------------------------------------------------------------------------------------------------------------------------------------------------------------------------------------------------------------------------------------------------------------------------------------------------------------------------------------------------------------------------------------------------------------------------------------------------------------------------------------------------------------------------------------------------------------------------------------------------------------------------------------------------------------------------------------------------------------------------------------------------------------------------------------------------------------------------------------------------------------------------------------------------------------------------------------------------------------------------------------------------------------------------------------------------------------------------------------------------------------------------------------------------------------------------------------------------------------------------------------------------------------------------------------------------------------------------------------------------------------------------------------------------------------------------------------------------------------------------------------------------------------------------------------------------------------------------------------------------------------------------------------------------------------------------------------------------------------------------------------------------------------------------------------------------------------------------------------------------------------------------------------------------------------------------------------------------------------------------------------------------------------------------------------------------------------------------------------------------------------------------------------------------------------------------------------------------------------------------------------------------------------------------------------------------------------------------------------------------------------------------------------------------------------------------------------------------------------------------------------------------------------------------------------------------------------------------------------------------------------------------------------------------------------------------------------------------------------------------------------------------------------------------------------------------------------------------------------------------------------------------------------------------------------------------------------------------------------------------------------------------------------------------------------------------------------------------------------------------------------------------------------------------------------------------------------------------------------------------------------------------------------------------------------------------------------------------------------------------------------------------------------------------------------------------------------------------------------------------------------------------------------------------------------------------------------------------------------------------------------------------------------------------------------------------------------------------------------------------------------------------------------------------------------------------------------------------------------------------------------------------------------------------------------------------------------------------------------------------------------------------------------------------------------------------------------------------------------------------------------------------------------------------------------------------------------------------------------------------------------------------------------------------------------------------------------------------------------------------------------------------------------------------------------------------------------------------------------------------------------------------------------------------------------------------------------------------------------------------------------------------------------------------------------------------------------------------------------------------------------------------------------------------------------------------------------------------------------------------------------------------------------------------------------------------------------------------------------------------------------------------------------------------------------------------------------------------------------------------------------------------------------------------------------------------------------------------------------------------------------------------------------------------------------------------------------------------------------------------------------------------------------------------------------------------------------------------------------------------------------------------|
| chrX | 15720904  | 24544391  | M2     | CA5B, ZRSR2, AP1S2, GRPR, MAGEB17, CTPS2, S100G, SYAP1, TXLNG, RBBP7, REPS2, NHS, SCML2, RAI2, BEND2, SCML2, CDKL5, RS1, PPEF1, PHKA2, GPR64, PDHA1, MAP3K15, SH3KBP1, Cxorf23, MAP7D2, EIF1AX, RPS6KA3, CNKSR2, KLHL34, SMPX, MBTPS2, YY2, SMS, PHEX, ZNF645, DDH53, PTCHD1, PRDX4, ACOT9, SAT1, APOO, Cxorf58, KLHL15, EIF2S3, ZFX, PDK3, CA5B1P, RNU5F-7P, SETP15, RPL6P30, RN7SL658P, MIR548AM, RNU7-56P, RNU4-6P, CBX1P2, CBX1P4, MIR4768, NHS-AS1, TMSB10P2, GJA6P, PPEF1-AS1, HAUS1P2, PHKA2-AS1, RN7SL48P, MIR23C, EIF1AX-AS1, RN7SKP183, RNU6-133P, RARRES2P3, RN7SL436P, PHEX-AS1, METTL15P3, RNU6-266P, FAM3C2, RPL9P7, ZFX-AS1, SUPT20HL2, SUPT20HL1, SNRPEP9                                                                                                                                                                                                                                                                                                                                                                                                                                                                                                                                                                                                                                                                                                                                                                                                                                                                                                                                                                                                                                                                                                                                                                                                                                                                                                                                                                                                                                                                                                                                                                                                                                                                                                                                                                                                                                                                                                                                                                                                                                                                                                                                                                                                                                                                                                                                                                                                                                                                                                                                                                                                                                                                                                                                                                                                                                                                                                                                                                                                                                                                                                                                                                                                                                                                                                                                                                                                                                                                                                                                                                                                                                                                                                                                                                                                                                                                                                                                                                                                                                                                                                                                                                                                                                                                                                                                                                                                                                                                                                                                                                                                                                                                                                                                                                                                                                        |
| chrX | 40489865  | 57937067  | M2     | SLC35A2, PIM2, MIR222, MED28P4, KRT18P68, PCNAP3, OTUD5, ACTBP1, GAPDHPP65, RNU6-50P, ZNF674-AS1, MKI67P1, PGAM1P7, YBX1P8, RNU6-1189P, RNU12-2P, INE1, RN7SL785P, RNU6-149P, SNORA11C, NPM1P49, NUS1P1, MIR4769, UXT-AS1, CXXC1P1, KCND1, WASF4P, RPL7P57, ZNF630-AS1, SSX6, RNU6-707P, SSXP3, RNA5SP503, GRIPAP1, SSX9, SSXP9, MRPL32P1, VN1R110P, RNU6-1056P, RNU6-29P, RNU6-722P, RN7SL139P, RNU4-52P, RN7SL262P, SYP-AS1, HSPB1P2, TFE3, VDAC1P2, SALL1P1, USP27X-AS1, RNU6-421P, MIR532, MIR188, MIR500A, MIR362, MIR501, MIR500B, MIR660, MIR622, PYY3, DGKK, CCDC120, PRAF2, WDR45, RNU6-935P, H3F3AP5, HMGB1P15, CENPV3, CENPV2, CENVP1, RNU6-504P, IPO7P1, TPMT3, SNORA11E, SNORA11D, RBM22P6, RBM22P7, RBM22P10, RBM22P8, RBM22P9, RBM22P11, SSXP4, SSXP1, SSX8, RNA5SP504, SSXP5, GPKOW, MAGIX, EIF4A2P4, PLP2, PRICKLE3, LINC01155, RNU7-37P, ACTG1P10, KDM5C-IT1, VTRNA3-1P, MIR98, MIRLET7F2, SYP, RNA5SP505, RPL7AP71, RNU6-434P, PGAM4P1, SNORA11, MTND2P24, MTND1P30, RPL23AP83, UQCRRBP1, PPP1R11P2, MTHFD1P1, CACNA1F, CCDC22, FOXP3, PPP1R3F, GAGE10, GAGE12J, GAGE13, GAGE2E, GAGE2D, GAGE12I, GAGE2C, GAGE2B, GAGE12B, GAGE12C, GAGE12D, GAGE12E, GAGE12F, GAGE12G, GAGE12H, GAGE2A, GAGE1, PAGE1, PAGE4, USP27X, CLCN5, AKAP4, CENB3, SHROOM4, BMP15, NUDT10, Cxorf67, NUDT11, GSPT2, MAGED1, MAGED4B, MAGED4, XAGE2B, XAGE1B, XAGE1A, XAGE2, XAGE1X, XAGE1D, XAGE1E, SSX7, SSX2, SSX2B, SPANXN5, XAGE5, XAGE3, FAM156B, FAM156A, GPR173, TSPYL2, KDM5C, IQSEC2, SMC1A, Cxorf38, MED14, USP9X, DDX3X, RIBC1, NYX, CASK, HSD17B10, GPR34, GPR82, MAOA, MAOB, NDP, EFHC2, FUNDC1, DUSP21, KDM6A, HUWE1, Cxorf36, KRBOX4, ZNF674, CHST7, SLC9A7, RP2, Cxorf31, JADE3, RGN, NDUFB11, RBM10, UBA1, CDK16, USP11, ZNF157, ZNF41, Cxorf24, ARAF, SYN1, TIMP1, CFP, ELK1, UXT, ZNF81, ZNF182, ZNF630, PHF8, SPACA5, SPACA5B, SSX5, SSX1, SSX3, SSX4, SSX4B, SLC38A5, FTSJ1, PORCN, EBP, TBC1D25, FAM120C, VNNK3, RBM3, WDR13, TSR2, FGD1, WAS, GNL3L, ITH6, MAGED2, SUV39H1, GLOD5, GATA1, HDAC6, TRO, ERAS, PCSK1N, TIMM17B, PFKFB1, PQBP1, APEX2, MED14-AS1, DPRXP6, ALAS2, MKRN4P, SDCBPP3, RPS2P55, RNA5SP501, RN7SL15P, CASK-AS1, RNU6-1321P, RN7SL406P, RN7SL144P, RNU6-202P, ATP5G2P4, RNU6-630P, RNU6-1124P, PPP1R2P9, IMPDH1P4, NANOOGP10, NDP-AS1, TATDN2P1, RRM2P3, PAGE2B, FDPSP5, CHTF8P1, RPL19P20, PAGE2, RN7SL291P, RNU6-523P, KRT8P14, MIR221, FAM104B, MTRNR2L10, PAGE5, PAGE3, MAGEH1, USP51, FOXR2, RRAAGB, KLF8, UBQLN2, SPIN3, SPIN2B, FAAH2, ZXDB, ZXDA                                                                                                                                                                                                                                                                                                                                                                                                                                                                                                                                                                                                                                                                                                                                                                                                                                                                                                                                                                                                                                                                                                                                                                                                                                                                                                                                                                                                                                                                                                                                                                                                                                                                                                                                                                                                                                                                                                                                                                                                                                                                                                                                                                                                                                                                                                                                                                                                                                                                                                                                                                                                                                                                                                                                                                                                                                                                                                                                                                                                                   |
| chrX | 62567107  | 70469875  | M2     | SPIN4-AS1, ARHGEF9-IT1, BTF3P8, MIR1468, HNRNPDP1, RN7SL799P, SHC1P1, YWHAZP7, KRT8P27, GRPEL2P2, CNOT4P2, MORF4L1P5, TLE1P1, FRMD8P1, NANOOGP9, ETF1P3, MIR223, EIF4BP9, PKMP2, RNU6-394P, RNU6-1225P, RNU6-245P, RPL31P63, COX6CP12, ACTR3P2, SERBP1P1, HMGN1P35, LINC00269, CYCSP43, CNA7P3, MIR676, MTND4P31, IGBP1-AS2, IGBP1-AS1, RN7SL581P, RNA5SP507, RNY4P23, RNU4-81P, DLG3-AS1, RPS23P8, RNU1-56P, SOCS5P4, RN7SL746P, SPIN4, ARHGEF9, AMER1, ASB12, MTMR8, ZC4H2, ZC3H12B, LAS1L, MSN, VSIG4, HEPH, EDA2R, AR, OPNH1, YJF6, STARDB, EFNB1, PJA1, FAM155B, EDA, AWAT2, OTUD6A, IGBP1, DGAT2L6, AWAT1, P2RY4, ARR3, RAB41, PDZD11, KIF4A, GDPD2, LCG3, TEX11, SLC7A3, SNX12, FOXO4, Cxorf65, IL2RG, MED12, NLGN3, RPS11, GJB1, ZMYM3                                                                                                                                                                                                                                                                                                                                                                                                                                                                                                                                                                                                                                                                                                                                                                                                                                                                                                                                                                                                                                                                                                                                                                                                                                                                                                                                                                                                                                                                                                                                                                                                                                                                                                                                                                                                                                                                                                                                                                                                                                                                                                                                                                                                                                                                                                                                                                                                                                                                                                                                                                                                                                                                                                                                                                                                                                                                                                                                                                                                                                                                                                                                                                                                                                                                                                                                                                                                                                                                                                                                                                                                                                                                                                                                                                                                                                                                                                                                                                                                                                                                                                                                                                                                                                                                                                                                                                                                                                                                                                                                                                                                                                                                                                                                                                   |
| chrX | 70469875  | 70712604  | M17,M2 | INGX, ZMYM3, NONO, ITGB1BP2, TAF1                                                                                                                                                                                                                                                                                                                                                                                                                                                                                                                                                                                                                                                                                                                                                                                                                                                                                                                                                                                                                                                                                                                                                                                                                                                                                                                                                                                                                                                                                                                                                                                                                                                                                                                                                                                                                                                                                                                                                                                                                                                                                                                                                                                                                                                                                                                                                                                                                                                                                                                                                                                                                                                                                                                                                                                                                                                                                                                                                                                                                                                                                                                                                                                                                                                                                                                                                                                                                                                                                                                                                                                                                                                                                                                                                                                                                                                                                                                                                                                                                                                                                                                                                                                                                                                                                                                                                                                                                                                                                                                                                                                                                                                                                                                                                                                                                                                                                                                                                                                                                                                                                                                                                                                                                                                                                                                                                                                                                                                                                |
| chrX | 70712604  | 138827948 | M2     | PIN4, ERCC6L, RPS4X, NKRF, CITED1, MIR5481A, SETP4, UBE2DNL, MIR361, NDUFA5P7, TPMT4P, EEF1A1P15, GEMIN8P3, MIR1277, RBBP8P1, FCF1P9, ARL5AP1, RNU6-112P, RNSAP15, AKAP17BP, MRPS17P9, RNU1-67P, RN7SL118P, SLC25A5-AS1, SEPT6, MIR766, SNORA69, SRIP2, USP12PX, RNF19BPX, UBE2V1P9, NKAPP1, RNU6-555P, PABPC5-AS1, SERBP1P4, RNU2-26P, VDAC1P3, EIF4A1P10, EEF1A1P30, KRT18P11, SNX3P1X, ST13P18, PA2G4P1, RPL7P55, HDAC8, RNU6-332P, PAICSF7, CCNB1P1P3, MIR548M, CALM1P1, RNA5SP510, HSPA8P1, MIR3672, TPT1P13, RPL3P12, HNRNPLDLP3, HNRNPLDLP1, RPS7P13, RN7SL379P, RPS29P28, RN7SKP194, RN7SL74P, DIAPH2-AS1, MRRFP1, RPL8P29, EEF1A1P15, HMGB1P32, XRCC6P5, RPSAP8, HNRNPA1P26, TUBB4AP1, FERP1, RN7SL29P, HNRNPA1P27, MEMO1P4, RNU7-69P, CHCHD2P1, XIAP-AS1, RNU6-122P, ZIK1P1, HSPA8P20, TRMT2B-AS1, NPM1P34, MTND4P4, RNU6-934P, NANOOGNB3, RPL21P132, SOWAHD, RPL39, ARMCX3-AS1, RNU6-30P, RNU6-587P, RNU6-345P, RPL7AP72, MTND6P13, TCP11X3P, KRT18P44, RPL32P35, RPS26P56, RNA5SP513, UFP3B, FOXN3P1, SALL4P2, NXF4, RNU6-1130P, FAM45B, RNU6-191P, OR11Q1P, OR11N1P, OR5AW1P, OR5B1P, OR1AA1P, RNU6-589P, LINC00630, MTND1P32, MTND2P2, OR13K1P, OR7L1P, OR2AF1P, HDGFP1, MTND4P32, MTND5P26, RNA5SP514, RAP2C-AS1, RNU6-98P, HSGS2-AS1, RNU1-115P, RNU6-203P, RPSAP63, TIMM8BP2, MIR363, MIR92A2, MIR19B2, MIR180B, MIR188, MIR106A, LARBP1B3, PHKA1, MIR450B, MIR450A1, MIR450A2, MIR542, MIR503HG, TCEAL3-AS1, RN7SL42-AS1, RNA5SP511, DPPA3P1, H2BFP, PHBP10, RPL18AP14, KCTD9P2, RNU6-207P, MIR503, LINC00629, NAP1L4P2, RPL21P133, RNF113A, RPS7P12, RNU4-44P, RNU6-616P, NDUFA1, HMGB3P3, MIR548AN, EEF1A1P40, NCLP2, LINC00087, LINC00633, MYCLP1, AKAP14, DNAAJ1P3, KRT18P49, DMRTC1B, FRMPD3-AS1, DMRTC1, RNU6-309P, LINC00086, RNA5SP515, CROCCP1, RPS5P7, DD26B-AS1, MIR652, MIR3978, SNORD96B, AMMECR1-IT1, TDGF1P3, FCF1P4, GLUD1P9, RNU6-496P, HMGB1P12, LINC00890, PABPC112A, RN7SL661P, EIF4BP7, PABPC112A, RPL18AP15, RNA5SP512, ALG13-AS1, TRPC50S, DPRXP7, HMGB3P30, NKAP, MIR4329, RN7SL266P, GAPDHP67, RNU6-1015P, MIR934, RNU6-320P, LINC00892, RNU6-972P, RPL7P56, RANP4, SNORD61, QTRT1P1, RNU1-57P, RN7SL93P, SUW27P1, RPL36AP53, SNORA35, MIR764, MIR1912, MIR1298, MIR1911, SRRM1P3, NAP1L6, NAP1L2, CDX4, CHIC1, RHOXF2B, HSPA8P7, RAC1P4, RHOXF1, MIR448, RHOXF2, ZCCHC13, RNU6-648P, RN7SL325P, ZFYVE9P1, YAP1P2, RNU6-985P, RN7SKP31, SLC16A2, ZBTB33, MAGEA13P, RPL36P18, RLIM, TMEM255A, ASS1P5, EEF1G6P5, KIAA2022, RN7SL712P, AKR1B1P8, API5P1, RNU6-154P, KRT8P6, RNU6-1323P, SETP8, ABCB7, MIR504, ZGF13-AS1, SNURFL, SRD5A1P1, TUBB4BP3, RPL12P43, UPRT, ATP1B4, ZDHHC15, INGX, LAMP2, Cxorf49, Cxorf49B, RNU6-1078P, RPS26P11, RN7SL388P, RN7SL264P, RNU6-286P, HSPA1-AS1, RNU1-112P, FAM226B, FAM226A, MAGEE2, PBD1, LINC00684, MAGEE1, FGF16, ATRX, YWHAZP8, RNU6-1044P, MORKL, RAB11FIP1P1, CT47A10, MIR421, MIR374B, RN7SL648P, MIR545, MIR374A, RN7SL790P, PRKRIRP1, UHRF2P1, DDX3YP1, C1GALT1C1, CT47B1, CT47A12, CT47A11, DDX3YP2, MKRNP5, USMG5P1, BMP2KL, RAB11FIP1P1, CT47A10, MIR421, MIR374B, RN7SL648P, MIR545, MIR374A, RN7SL790P, PRKRIRP1, RPS7P14, MAGT1, RN7SL641P, HNRNPA1P25, CT47A9, PABPC1P3, RNU6-330P, RNU6-562P, RPL21P134, CT47A8, PCNPP4, BRAFP1, CT47A7, TTC3P1, SAR1AP4, CT47A5, CT47A6, CT47A4, RNU6-867P, LDHBP2, RNA5SP508, MIR325, RNA5SP509, CT47A3, FABP5P15, RNU6-854P, RN7SL460P, FNDC3CP, HMGN1P34, UBE2V1P7, PPATP2, RPL7P54, KIF4CP, COX7B, CT47A1, CT47A2, ATP7A, CHMP1B2P, HNRNHP3P1, HK2P1, RNU6-493P, VDAC1P1, RNU6-995P, GLUD2, RNU6-974P, RPL22P22, GRIA3, ATG4AP1, TERF1P4, PGAMA, PGK1, THOC2, TAF9B, XIAP, CYSLTR1, ZCCHC5, LPAR4, P2RY10, GPR174, ITM2A, STAG2, TBX22, FAM46D, BRWD3, SH2D1A, TENM1, HMGN5, DCAF12L2, DCAF12L1, Cxorf64, ACTR11, SMARCA1, SH3BGR, POU3F4, CYLC1, OCLR, RPS6KA6, HDX, APLN, XPNPEP2, SASH3, APOOL, SATL1, ZDHHC9, ZNF711, POF1B, UTP14A, CHM, DACH2, BCORL1, KLHL4, ELF4, CPXCR1, TGIF2LX, AIFM1, PABPC5, PCDH11X, NAP1L3, FAM133A, DIAPH2, RPA4, PCDH19, RAB33A, ZNF280C, TNMD, TSPAN6, SLC25A14, SRPX2, SYTL4, GPR119, RBMX2, CSTF2, NOX1, ENOX2, XKRX, ARL13A, ARHGAP36, TRMT2B, IGSF1, TMEM35, CENPI, DRP2, OR13H1, FRMD7, RAP2C, TAF7L, MBNL3, TIMM8A, BTK, RPL36A, HSGS2, RPL36A-HNRNPH2, GLA, HNRNPH2, ARMCX4, ARMCX1, ARMCX6, ARMCX3, USP26, TFDP3, GPC4, GPC3, ARMCX2, CCDC160, PHF6, HPR11, NXF5, PLAC1, FAM122B, FAM122C, ZMAT1, MOSPD1, TCEAL2, TCEAL3, TCEAL6, BEX5, NXF2, SMIM10, FAM127C, FAM127A, FAM127B, CT55, ZNF75D, ZNF449, DDX26B, TCP11X1, NXF2B, CT45A1, CT45A2, CT45A3, TCP11X2, TMSB15A, ARMCX5, CT45A4, CT45A5, GPRASP1, GPRASP2, CT45A6, BHLHB9, SAGE1, RAB40AL, BEX1, NXF3, MMGT1, SLC9A6, BEX4, TCEAL8, FH1L, TCEAL5, BEX2, TCEAL7, WBP5, NGRFRAP1, RAB40A, MAPP7D, TCEAL4, TCEAL3, TCEAL1, MORF4L2, GPR112, BR3, HTASF1, VGLL1, CD40LG, ARHGEF6, GLRA4, TMEM31, PLP1, RBMX, GPR101, ZIC3, RAB9B, TMSB15B, H2BFWT, H2BFM, SLC25A53, ZCCHC18, FAM199X, FGF13, ESX1, F9, IL1RAPL2, TEX13A, NRK, MCF2, SERPINA7, MUM1L1, Cxorf57, RNF128, TBC1D8B, MORC4, ATP11C, RIPPLY1, CLDN2, RBM41, NUP62CL, PIH1D3, FRMPD3, PRPS1, TSC22D3, NCBP2L, MID2, TEX13B, VSIG1, PSM1D10, ATG4A, COL4A6, COL4A5, IRS4, GUCY2F, NKT2, KCNE1L, ACSL4, TAF1, TMEM164, AMMECR1, OGT, GNG5P2, RGAG1, CHRDL1, ACRC, CXCR3, NHAAL2, RGAGA, PAK3, CAPN6, DCX, ALG13, TRPC5, ZCCHC16, LHFPL1, AMOT, HTR2C, IL13RA2, LRCH2, RBMLX3, LUZP4, PLS3, AGTR2, SLC6A14, CT83, KLHL13, WDR44, DOCK11, IL13RA1, ZCCHC12, LONRF3, KIAA1210, PGRMC1, SLC25A43, SLC25A5, Cxorf66, UBE2A |
| chrX | 138827948 | 139796338 | M14,M2 | RNU6ATAC23P, MIR505, HNRNPA3P3, RN7SL727P, RPS17P17, ATP11C, Cxorf66, SOX3, LINC00632                                                                                                                                                                                                                                                                                                                                                                                                                                                                                                                                                                                                                                                                                                                                                                                                                                                                                                                                                                                                                                                                                                                                                                                                                                                                                                                                                                                                                                                                                                                                                                                                                                                                                                                                                                                                                                                                                                                                                                                                                                                                                                                                                                                                                                                                                                                                                                                                                                                                                                                                                                                                                                                                                                                                                                                                                                                                                                                                                                                                                                                                                                                                                                                                                                                                                                                                                                                                                                                                                                                                                                                                                                                                                                                                                                                                                                                                                                                                                                                                                                                                                                                                                                                                                                                                                                                                                                                                                                                                                                                                                                                                                                                                                                                                                                                                                                                                                                                                                                                                                                                                                                                                                                                                                                                                                                                                                                                                                            |
| chrX | 139796338 | 150911060 | M2     | ELL2P4, Cxorf51B, Cxorf51A, MIR513C, MIR513B, MIR513A1, MIR513A2, MIR506, MIR507, MIR508, MIR514B, MIR509-2, MIR509-3, MIR509-1, MIR510, MIR514A1, MIR514A2, MIR514A3, RNU6-382P, FMR1-AS1, FMR1-IT1, FTH1P8, RPL7L1P11, AFF2-IT1, RN7SKP267, RNU7-98P, IDSP1, LINC00893, TMEM185AP1, MAGEA8P, DUTP4, MAGEA8-AS1, LINC00894, MIR2114, XRCC6P2, RNU6-383P, RPL19P21, MIR4330, GPR50-AS1, MIR320D2, RNU6-3P, RBMX2P2, SPANX2-OT1, RNA5SP516, RN7SKP81, RN7SKP149, PGBD4P6, MTND1P33, HNRNPH1P2, RRM2P4, HNRNPPCP10, RN7SKP189, CYCSP44, MIR890, MIR888, MIR892A, MIR892B, MIR891B, MIR891A, RNA5SP517, LINC00632, CDR1, SPANXB2, SPANXB1, LDOC1, SPANXC, SPANXA1, SPANX2A, SPANXD, MAGEC3, MAGEC1, MAGEC2, SPANXN4, SPANXN3, SLITRK4, SPANXN2, UBE2NL, SPANXN1, SLITRK2, TMEM257, FMR1, FMR1NB, AFF2, IDS, Cxorf40A, MAGEA9B, HSF2, MAGE2, TMEM185A, MAGEA11, HSF1, MAGEA9, MAGEA8, Cxorf40B, MAMLD1, MTM1, CD99L2, HMGB3, GPR50, VMA21, PASD1, PRRG3, FATE1, CNGA2                                                                                                                                                                                                                                                                                                                                                                                                                                                                                                                                                                                                                                                                                                                                                                                                                                                                                                                                                                                                                                                                                                                                                                                                                                                                                                                                                                                                                                                                                                                                                                                                                                                                                                                                                                                                                                                                                                                                                                                                                                                                                                                                                                                                                                                                                                                                                                                                                                                                                                                                                                                                                                                                                                                                                                                                                                                                                                                                                                                                                                                                                                                                                                                                                                                                                                                                                                                                                                                                                                                                                                                                                                                                                                                                                                                                                                                                                                                                                                                                                                                                                                                                                                                                                                                                                                                                                                                                                                                                                                                                                |
| chrX | 150911060 | 151284195 | M14,M2 | MIR224, MIR452, MAGEA5, CNGA2, MAGEA4, GABRE                                                                                                                                                                                                                                                                                                                                                                                                                                                                                                                                                                                                                                                                                                                                                                                                                                                                                                                                                                                                                                                                                                                                                                                                                                                                                                                                                                                                                                                                                                                                                                                                                                                                                                                                                                                                                                                                                                                                                                                                                                                                                                                                                                                                                                                                                                                                                                                                                                                                                                                                                                                                                                                                                                                                                                                                                                                                                                                                                                                                                                                                                                                                                                                                                                                                                                                                                                                                                                                                                                                                                                                                                                                                                                                                                                                                                                                                                                                                                                                                                                                                                                                                                                                                                                                                                                                                                                                                                                                                                                                                                                                                                                                                                                                                                                                                                                                                                                                                                                                                                                                                                                                                                                                                                                                                                                                                                                                                                                                                     |
| chrX | 151284195 | 155240482 | M2     | MAGEA5, RNU6-764P, MIR105-1, MIR767, MIR105-2, KRT8P8, CSAG3, CSAG4, CSAG2, RN7SL190P, RN7SL667P, KRT18P48, NAA10, RPL18AP16, RN7SL687P, CYCSP45, HCFCA1-AS1, MIR3202-2, MIR3202-1, MIR718, SNORA70, RN7SL697P, RN7SL742P, ATF4P2, ATF4P1, IKBKGP1, OR3B1P, SNORA36A, SNORA56, HMGN1P37, MIR1184-2, EEF1A1P31, RENBP, MIR1184-3, MIR1184-2, TMLHE-AS1, AMDP1, DPH3P2, TCEB1P24, TRPC6P, HCF1, TMEM187, IRAK1, MECP2, OPN1LW, TEX28P2, OPN1MW, TEX28P1, OPN1MW2, TEX28, TKTL1, FLNA, EMD, RPL10, DNASE1L1, TAZ, ATP6AP1, GDI1, FAM50A, PLXNA3, LAGE3, UBL4A, SLC10A3, FAM3A, G6PD, IKBKG, CTAG1A, CTAG1B, CTAG2, GAB3, DKC1, MPP1, SMX19, H8, H2AFB1, F8, H2AF1, F11, FUNDC2, MTCP1, CMC4, BRCC3, VBP1, RAB39B, CLIC2, H2AFB2, F8A2, F8A3, H2AFB3, TMLHE, SPRY3, VAMP7, IL9R, MAGEA10, GABRA3, GABRQ, MAGEA6, MAGEA2B, MAGEA12, CSAG1, MAGEA2, MAGEA3, CETN2, NSDHL, ZNF185, PNMA5, PNMA3, PNMA6C, PNMA6A, PNMA6D, PNMA6B, MAGEA1, ZNF275, ZFP92, TREX2, HAUS7, BGN, ATP2B3, FAM58A, DUSP9, PNCK, SLC6A8, BCAP31, ABCD1, PLXNB3, SRPK3, IDH3G, SRR4, PDZD4, L1CAM, AVPR2, ARHGAP4                                                                                                                                                                                                                                                                                                                                                                                                                                                                                                                                                                                                                                                                                                                                                                                                                                                                                                                                                                                                                                                                                                                                                                                                                                                                                                                                                                                                                                                                                                                                                                                                                                                                                                                                                                                                                                                                                                                                                                                                                                                                                                                                                                                                                                                                                                                                                                                                                                                                                                                                                                                                                                                                                                                                                                                                                                                                                                                                                                                                                                                                                                                                                                                                                                                                                                                                                                                                                                                                                                                                                                                                                                                                                                                                                                                                                                                                                                                                                                                                                                                                                                                                                                                                                                                                                                                                                                                                                                 |

Supplementary Table S8

Mutations reported in Figures 1, 4 and 5 and found in TCGA and Cosmic databases

| Genes   | Sample          | Mutation | TCGA        | Cosmic                                                                                                                                                                                                                                                                                                                                                                                                                                                     |
|---------|-----------------|----------|-------------|------------------------------------------------------------------------------------------------------------------------------------------------------------------------------------------------------------------------------------------------------------------------------------------------------------------------------------------------------------------------------------------------------------------------------------------------------------|
| BRAF    | M8, M4, M9, M11 | V600E    | 0.37        | ID=COSM476; OCCURENCE=3(adrenal_gland),3(urinary_tract),4(genital_tract),7(pancreas),16(liver),68(eye),2(prostate),4161(large_intestine),21(biliary_tract),11(breast),4377(skin),9(small_intestine),1(autonomic_ganglia),20(pituitary),242(ovary),32(soft_tissue),7(testis),459(haematopoietic_and_lymphoid_tissue),9534(thyroid),78(lung),1(meninges),12(upper_aerodigestive_tract),717(NS),15(bone),2(oesophagus),4(stomach),228(central_nervous_system) |
| BRAF    | M14             | D594N    | 0.002932551 | ID=COSM27639; OCCURENCE=1(lung),1(haematopoietic_and_lymphoid_tissue),8(skin),1(small_intestine),7(large_intestine)                                                                                                                                                                                                                                                                                                                                        |
| KRAS    | M14             | A146T    |             | ID=COSM1165198, COSM19404; OCCURENCE=91(large_intestine),2(small_intestine),1(upper_aerodigestive_tract),11(haematopoietic_and_lymphoid_tissue)                                                                                                                                                                                                                                                                                                            |
| ARAF    | M8              | V340L    |             |                                                                                                                                                                                                                                                                                                                                                                                                                                                            |
| ARAF    | M14             | P194A/Q  |             |                                                                                                                                                                                                                                                                                                                                                                                                                                                            |
| NF1     | M16             | Q1815X   |             | ID=COSM3402744, COSM41804; OCCURENCE=1(central_nervous_system),1(soft_tissue)                                                                                                                                                                                                                                                                                                                                                                              |
| NF1     | M9              | R1276X   |             | ID=COSM1177899, COSM30762; OCCURENCE=1(haematopoietic_and_lymphoid_tissue),2(soft_tissue),1(endometrium)                                                                                                                                                                                                                                                                                                                                                   |
| PTEN    | M16             | E73V     |             | ID=COSM5235; OCCURENCE=1(endometrium)                                                                                                                                                                                                                                                                                                                                                                                                                      |
| EGFR    | M2              | L654I    |             |                                                                                                                                                                                                                                                                                                                                                                                                                                                            |
| FGFR4   | M16             | W655X    |             |                                                                                                                                                                                                                                                                                                                                                                                                                                                            |
| FGFR4   | M2              | S375P    |             |                                                                                                                                                                                                                                                                                                                                                                                                                                                            |
| ERBB3   | M9              | G1043V   |             |                                                                                                                                                                                                                                                                                                                                                                                                                                                            |
| ERBB4   | M16             | G146E    |             |                                                                                                                                                                                                                                                                                                                                                                                                                                                            |
| ERBB4   | M14             | K361M    |             |                                                                                                                                                                                                                                                                                                                                                                                                                                                            |
| PPP6C   | M11             | P20L     |             |                                                                                                                                                                                                                                                                                                                                                                                                                                                            |
| MET     | M16             | S233F    |             |                                                                                                                                                                                                                                                                                                                                                                                                                                                            |
| KIT     | M16             | L576P    | 0.002932551 | ID=COSM1290; OCCURENCE=1(haematopoietic_and_lymphoid_tissue),2(testis),2(NS),2(thymus),2(large_intestine),1(genital_tract),53(skin),2(breast),19(soft_tissue)                                                                                                                                                                                                                                                                                              |
| KIT     | M2              | D816Y    |             | ID=COSM1310; OCCURENCE=1(large_intestine),1(genital_tract),4(ovary),40(haematopoietic_and_lymphoid_tissue),4(testis)                                                                                                                                                                                                                                                                                                                                       |
| GRIA1   | M16             | G184E    | 0.005865103 |                                                                                                                                                                                                                                                                                                                                                                                                                                                            |
| GRIA1   | M8              | splicing |             |                                                                                                                                                                                                                                                                                                                                                                                                                                                            |
| GRIA1   | M9              | G462E    |             |                                                                                                                                                                                                                                                                                                                                                                                                                                                            |
| GRM3    | M16             | S255F    |             |                                                                                                                                                                                                                                                                                                                                                                                                                                                            |
| GRM8    | M16             | R651Q    |             | ID=COSM3698018, COSM203268; OCCURENCE=1(skin),2(large_intestine)                                                                                                                                                                                                                                                                                                                                                                                           |
| GRM8    | M16             | S129L    | 0.002932551 | ID=COSM222142; OCCURENCE=1(skin)                                                                                                                                                                                                                                                                                                                                                                                                                           |
| GRIN3A  | M4              | E1105G   |             |                                                                                                                                                                                                                                                                                                                                                                                                                                                            |
| GRIN3A  | M9              | R708Q    | 0.002932551 |                                                                                                                                                                                                                                                                                                                                                                                                                                                            |
| GRIN3B  | M14             | A488G    |             |                                                                                                                                                                                                                                                                                                                                                                                                                                                            |
| TP53    | M1              | R196X    | 0.008797654 | ID=COSM1640847, COSM99667, COSM99666, COSM99668, COSM3378446, COSM99665, COSM10705; OCCURENCE=10(haematopoietic_and_lymphoid_tissue),9(lung),8(upper_aerodigestive_tract),17(oesophagus),13(central_nervous_system),11(stomach),1(liver),1(kidney),9(pancreas),6(urinary_tract),42(large_intestine),2(biliary_tract),10(skin),22(breast),11(ovary)                                                                                                         |
| TP53BP2 | M16             | C49S     |             |                                                                                                                                                                                                                                                                                                                                                                                                                                                            |
| TP53BP2 | M11             | S564R    |             |                                                                                                                                                                                                                                                                                                                                                                                                                                                            |
| BRCA1   | M1              | splicing |             |                                                                                                                                                                                                                                                                                                                                                                                                                                                            |
| TSC2    | M11             | G113S/D  |             |                                                                                                                                                                                                                                                                                                                                                                                                                                                            |
| TSC2    | M14             | R901C    |             | ID=COSM1230660, COSM1230661; OCCURENCE=1(large_intestine),1(prostate)                                                                                                                                                                                                                                                                                                                                                                                      |
| CHD9    | M11             | R1988C   |             | ID=COSM971432; OCCURENCE=1(endometrium)                                                                                                                                                                                                                                                                                                                                                                                                                    |
| CHD9    | M14             | A460D    |             |                                                                                                                                                                                                                                                                                                                                                                                                                                                            |
| NALCN   | M2              | V1152I   |             |                                                                                                                                                                                                                                                                                                                                                                                                                                                            |
| NALCN   | M14             | H1531Y   | 0.002932551 |                                                                                                                                                                                                                                                                                                                                                                                                                                                            |
| NOTCH4  | M11             | A1063T   |             |                                                                                                                                                                                                                                                                                                                                                                                                                                                            |
| KMT2C   | M4              | D348N    |             | ID=COSM228110; OCCURENCE=1(skin)                                                                                                                                                                                                                                                                                                                                                                                                                           |
| KMT2C   | M17             | V919L    |             | ID=COSM1131647; OCCURENCE=1(prostate),1(thyroid)                                                                                                                                                                                                                                                                                                                                                                                                           |
| KMT2C   | M11             | R380L    |             | ID=COSM225885; OCCURENCE=2(skin)                                                                                                                                                                                                                                                                                                                                                                                                                           |
| KMT2C   | M11             | C391X    |             | ID=COSM230133; OCCURENCE=1(NS)                                                                                                                                                                                                                                                                                                                                                                                                                             |
| KMT2C   | M2              | R284Q    |             | ID=COSM1179107; OCCURENCE=1(large_intestine),2(prostate),3(breast)                                                                                                                                                                                                                                                                                                                                                                                         |
| SMARCA2 | M6              | Q233P    |             |                                                                                                                                                                                                                                                                                                                                                                                                                                                            |
| SMARCA2 | M11             | A1389S   |             |                                                                                                                                                                                                                                                                                                                                                                                                                                                            |
| PREX1   | M4              | P1028L   |             |                                                                                                                                                                                                                                                                                                                                                                                                                                                            |
| PREX1   | M6              | E462A    |             |                                                                                                                                                                                                                                                                                                                                                                                                                                                            |
| SMG1    | M17             | G1875V   |             |                                                                                                                                                                                                                                                                                                                                                                                                                                                            |
| SMG1    | M16             | P902S    |             |                                                                                                                                                                                                                                                                                                                                                                                                                                                            |

|         |     |          |
|---------|-----|----------|
| CNOT1   | M17 | Q1597H   |
| CNOT1   | M16 | P1027S   |
| SLIT2   | M4  | L224F    |
| SLIT3   | M4  | S268L    |
| SLIT3   | M9  | G575R    |
| ROBO2   | M11 | splicing |
| ROBO4   | M11 | T404I    |
| EPHA8   | M16 | A451G    |
| SEMA3D  | M11 | E115K    |
| SEMA3F  | M4  | splicing |
| SEMA4B  | M16 | S231F    |
| SEMA6B  | M11 | A307V    |
| SEMA6B  | M11 | P275L    |
| NOTCH2  | M4  | N922S    |
| NOTCH3  | M4  | R1669H   |
| NCOR1   | M11 | splicing |
| HEY2    | M11 | L253F    |
| LNX2    | M9  | L278F    |
| GLI1    | M9  | T1045A   |
| GLI2    | M16 | P1013S   |
| GLI2    | M16 | P1013L   |
| HHIP    | M16 | R128K    |
| VEGFA   | M9  | S256F    |
| MST1    | M16 | splicing |
| MST1    | M9  | splicing |
| MST1R   | M16 | P521L    |
| MST1R   | M11 | H79N     |
| NTRK1   | M2  | H291Y    |
| FLT1    | M11 | S1322C   |
| ROS1    | M16 | W1477X   |
| ROS1    | M16 | S615F    |
| ASXL3   | M16 | S1721Y   |
| ASXL3   | M9  | S1721F   |
| KMT2B   | M9  | F1225S   |
| CHD2    | M16 | S260N    |
| CHD6    | M11 | S2548F   |
| CHD7    | M11 | E2972X   |
| SMARCA1 | M16 | R716K    |
| SUV39H1 | M17 | V321L    |
| SETBP1  | M11 | P462H    |
| SETBP1  | M11 | P906S    |
| PRC1    | M16 | W26X     |
| SMYD1   | M9  | R449H    |
| PRDM10  | M8  | Q1037P   |
| REST    | M1  | P784L    |
| PRDM9   | M16 | E496K    |
| PRDM16  | M16 | S436F    |
| TET1    | M16 | I843K    |

ID=COSM992073.COSM1589832;OCCURENCE=1(endometrium)
